# Supplementary material for: Single-oocyte transcriptional profile of early-stage human oocytes reveals differentially expressed genes in the primordial and transitioning stages
Source: Research Square preprint supplement (doi:10.21203/rs.3.rs-6957514/v1), 2025-07-03
Supplement: Supplementary file 1 [file 3760588ec95bda3ff432a700.xlsx]

## Sheet: DE_results
ENSEMBL	Symbol	entrezgene_id	pct.1	pct.2	mean.1	mean.2	fc(m2-m1)	pval	FDR
ENSG00000000003	TSPAN6	7105	1	0.964706	6.47937	5.903	-0.576365	0.07854	0.177314
ENSG00000000005	TNMD	64102	0.291667	0.141176	-0.799688	-1.76095	-0.961258	0.017377	0.0563065
ENSG00000000419	DPM1	8813	0.958333	0.941176	3.8598	3.80161	-0.0581886	0.882668	0.932974
ENSG00000000457	SCYL3	57147	0.458333	0.388235	-0.265522	-0.420472	-0.154949	0.665313	0.787374
ENSG00000000460	C1orf112	55732	0.8125	0.764706	2.01632	2.47852	0.462195	0.0904478	0.197152
ENSG00000000971	CFH	3075	0.895833	0.352941	3.96776	-0.531358	-4.49912	7.36394e-13	1.35214e-10
ENSG00000001036	FUCA2	2519	1	0.929412	4.98349	4.20753	-0.775965	0.0249701	0.0748844
ENSG00000001084	GCLC	2729	0.833333	0.941176	2.53728	3.25074	0.713456	0.0700499	0.162544
ENSG00000001167	NFYA	4800	0.666667	0.670588	0.900902	1.29046	0.38956	0.40769	0.57365
ENSG00000001460	STPG1	90529	0.958333	1	4.41082	5.54267	1.13185	2.7238e-05	0.000311607
ENSG00000001461	NIPAL3	57185	0.979167	1	5.84612	6.45883	0.612714	0.000335332	0.00233998
ENSG00000001497	LAS1L	81887	1	1	7.63608	7.91904	0.282958	0.303783	0.469293
ENSG00000001561	ENPP4	22875	0.375	0.352941	-0.500661	-0.765138	-0.264477	0.645144	0.772456
ENSG00000001626	CFTR	1080	0.458333	0.552941	-1.29634	-1.11117	0.185172	0.341222	0.508462
ENSG00000001629	ANKIB1	54467	0.666667	0.741176	1.09989	1.07772	-0.0221735	0.781532	0.869343
ENSG00000001630	CYP51A1	1595	1	1	4.99093	5.12243	0.131502	0.405643	0.571302
ENSG00000001631	KRIT1	889	0.916667	0.964706	2.40497	3.15983	0.754852	0.0141763	0.0478601
ENSG00000002016	RAD52	5893	0.5	0.2	-0.432814	-1.65797	-1.22516	0.000266655	0.00194591
ENSG00000002079	MYH16	.	0.6875	0.635294	1.57745	1.10288	-0.474574	0.490801	0.649423
ENSG00000002330	BAD	572	1	0.988235	5.8055	5.49359	-0.311906	0.152355	0.287741
ENSG00000002549	LAP3	51056	1	0.988235	5.98377	5.98893	0.00516267	0.849511	0.912672
ENSG00000002586	CD99	4267	1	1	7.68149	7.60039	-0.0810981	0.495451	0.653259
ENSG00000002587	HS3ST1	9957	0.958333	0.494118	4.9039	-0.184843	-5.08874	1.88228e-15	1.22981e-12
ENSG00000002746	HECW1	23072	0.875	0.764706	1.51508	0.945157	-0.569928	0.168977	0.309965
ENSG00000002822	MAD1L1	8379	1	1	8.45451	8.74269	0.288184	0.00888198	0.032984
ENSG00000002834	LASP1	3927	0.958333	0.952941	4.18873	4.14781	-0.0409217	0.979442	0.988415
ENSG00000002919	SNX11	29916	1	1	7.57277	7.71051	0.137735	0.138128	0.267486
ENSG00000002933	TMEM176A	55365	0.875	0.576471	3.53975	0.224615	-3.31514	1.46456e-09	7.52056e-08
ENSG00000003056	M6PR	4074	1	0.988235	5.55394	5.69481	0.140871	0.0515814	0.129081
ENSG00000003096	KLHL13	90293	0.375	0.235294	-0.476716	-1.49459	-1.01787	0.0317242	0.0898821
ENSG00000003137	CYP26B1	56603	0.458333	0.529412	-0.18605	0.0119658	0.198016	0.683616	0.800952
ENSG00000003147	ICA1	3382	1	1	5.20352	5.52208	0.318554	0.0026116	0.012457
ENSG00000003249	DBNDD1	79007	0.708333	0.670588	2.14051	1.44835	-0.692159	0.202864	0.352549
ENSG00000003393	ALS2	57679	0.895833	0.929412	3.33493	3.85319	0.518257	0.0249359	0.0748736
ENSG00000003402	CFLAR	8837	0.833333	0.682353	2.38233	0.945405	-1.43692	0.00140354	0.00749089
ENSG00000003436	TFPI	7035	0.4375	0.270588	-0.43696	-1.18112	-0.744162	0.0530935	0.131795
ENSG00000003509	NDUFAF7	55471	0.729167	0.776471	1.64706	2.23243	0.585372	0.249661	0.409228
ENSG00000003756	RBM5	10181	0.958333	0.988235	4.617	4.60501	-0.0119876	0.919767	0.954365
ENSG00000003987	MTMR7	9108	0.604167	0.858824	0.673851	2.0068	1.33295	0.00656499	0.0259093
ENSG00000003989	SLC7A2	6542	0.666667	0.458824	1.08473	-0.232148	-1.31688	0.0103955	0.0374534
ENSG00000004059	ARF5	381	1	1	8.49831	8.41985	-0.0784607	0.217019	0.369553
ENSG00000004139	SARM1	23098	0.3125	0.129412	-0.793202	-1.79702	-1.00381	0.00790542	0.030001
ENSG00000004142	POLDIP2	26073	1	1	7.66526	7.94288	0.277619	0.0580823	0.141228
ENSG00000004399	PLXND1	23129	0.541667	0.611765	-0.0735072	0.637186	0.710693	0.140216	0.270549
ENSG00000004455	AK2	204	1	1	5.29194	5.16532	-0.126623	0.637754	0.7674
ENSG00000004468	CD38	952	0.979167	1	4.31553	5.03929	0.723763	0.00393148	0.0172458
ENSG00000004478	FKBP4	2288	1	1	7.74286	7.80212	0.0592541	0.424412	0.589874
ENSG00000004487	KDM1A	23028	1	1	6.46102	7.01797	0.556946	0.000724288	0.00435675
ENSG00000004534	RBM6	10180	0.958333	0.952941	5.46494	4.47777	-0.987165	4.8678e-06	7.55529e-05
ENSG00000004660	CAMKK1	84254	0.354167	0.435294	-0.68128	-0.113936	0.567343	0.210749	0.362372
ENSG00000004700	RECQL	5965	0.666667	0.752941	1.14404	1.84839	0.704353	0.120875	0.242487
ENSG00000004766	VPS50	55610	0.9375	0.988235	4.03484	5.20884	1.174	0.000604801	0.00378193
ENSG00000004776	HSPB6	126393	1	1	7.10188	6.7201	-0.381779	0.0060007	0.0241329
ENSG00000004777	ARHGAP33	115703	0.895833	0.929412	3.24487	3.88719	0.642317	0.0040397	0.0176651
ENSG00000004779	NDUFAB1	4706	1	1	6.40988	6.50119	0.0913175	0.130812	0.257029
ENSG00000004799	PDK4	5166	0.875	0.305882	2.48633	-1.26529	-3.75162	2.13172e-13	4.71206e-11
ENSG00000004838	ZMYND10	51364	0.25	0.176471	-1.02293	-1.48114	-0.458217	0.275672	0.43823
ENSG00000004848	ARX	170302	0.958333	0.811765	3.51487	2.26156	-1.25331	0.00611103	0.0244953
ENSG00000004864	SLC25A13	10165	0.9375	0.929412	3.52123	3.67398	0.152743	0.559644	0.706405
ENSG00000004866	ST7	7982	0.9375	0.941176	4.25521	4.25709	0.00187373	0.606271	0.743142
ENSG00000004897	CDC27	996	0.958333	0.988235	4.69255	4.96993	0.277375	0.319462	0.485723
ENSG00000004948	CALCR	799	0.333333	0.6	-0.687577	0.571668	1.25924	0.00582051	0.0235699
ENSG00000004961	HCCS	3052	1	1	6.56472	7.15189	0.587166	3.23911e-07	7.82272e-06
ENSG00000004975	DVL2	1856	0.916667	0.941176	4.35533	5.11872	0.763393	0.0309461	0.0880996
ENSG00000005007	UPF1	5976	0.979167	1	6.62468	7.00962	0.384942	0.0593346	0.143371
ENSG00000005020	SKAP2	8935	0.958333	1	4.85916	5.56302	0.703864	0.0550472	0.135406
ENSG00000005022	SLC25A5	292	1	1	9.82812	10.0906	0.262468	0.00784361	0.0297975
ENSG00000005059	MCUB	55013	0.979167	1	6.462	7.11597	0.65397	0.000186766	0.00146781
ENSG00000005075	POLR2J	5439	1	1	8.0592	8.06429	0.00508998	0.897487	0.941457
ENSG00000005100	DHX33	56919	0.75	0.870588	1.23703	2.42961	1.19258	0.0050813	0.0210934
ENSG00000005108	THSD7A	221981	0.895833	1	3.60018	5.39178	1.7916	1.30527e-08	5.04041e-07
ENSG00000005156	LIG3	3980	0.770833	0.788235	1.91256	2.5235	0.610937	0.0532089	0.132027
ENSG00000005175	RPAP3	79657	1	1	5.76925	6.33057	0.561324	0.00237986	0.0115209
ENSG00000005187	ACSM3	6296	0.979167	0.529412	4.66679	0.107333	-4.55946	2.26985e-14	8.0996e-12
ENSG00000005189	REXO5	81691	0.958333	0.929412	4.06136	4.52205	0.460696	0.0284905	0.0828341
ENSG00000005194	CIAPIN1	57019	1	1	8.03804	8.23573	0.197692	0.185666	0.330854
ENSG00000005206	SPPL2B	56928	0.875	0.788235	2.9818	2.59089	-0.39091	0.698275	0.811226
ENSG00000005238	FAM214B	80256	0.5625	0.729412	0.823491	2.03589	1.2124	0.0153403	0.050886
ENSG00000005243	COPZ2	51226	0.4375	0.129412	-0.479623	-1.86572	-1.3861	3.97909e-05	0.000425231
ENSG00000005249	PRKAR2B	5577	0.875	0.729412	2.5321	0.971044	-1.56105	0.000479341	0.00312199
ENSG00000005302	MSL3	10943	1	1	7.07189	7.49499	0.423107	0.00290792	0.0135609
ENSG00000005339	CREBBP	1387	0.979167	0.964706	3.79618	4.16044	0.364254	0.141263	0.27205
ENSG00000005379	TSPOAP1	9256	0.5	0.0588235	0.119317	-2.11396	-2.23328	1.94904e-09	9.70676e-08
ENSG00000005421	PON1	5444	0.333333	0.529412	-0.993153	0.199756	1.19291	0.011547	0.0407972
ENSG00000005436	GCFC2	6936	0.916667	0.964706	3.59826	4.25746	0.659198	0.00328172	0.0149239
ENSG00000005448	WDR54	84058	0.854167	0.847059	3.71095	2.87336	-0.837584	0.00161235	0.00837423
ENSG00000005469	CROT	54677	0.416667	0.529412	-0.814513	-0.120949	0.693564	0.0912797	0.198407
ENSG00000005471	ABCB4	5244	0.604167	0.764706	0.743973	2.05579	1.31182	0.0133387	0.0457284
ENSG00000005483	KMT2E	55904	1	1	7.70714	7.89752	0.190378	0.0632264	0.150407
ENSG00000005486	RHBDD2	57414	1	1	6.89644	6.5585	-0.337933	0.00864116	0.0322478
ENSG00000005513	SOX8	30812	0.3125	0.235294	-0.997435	-1.12756	-0.130121	0.46425	0.626141
ENSG00000005700	IBTK	25998	0.833333	0.729412	2.17407	1.34257	-0.831505	0.0882995	0.1939
ENSG00000005801	ZNF195	7748	0.979167	0.976471	4.43258	5.11986	0.68728	0.000688072	0.00418346
ENSG00000005810	MYCBP2	23077	0.9375	0.952941	4.0346	3.86131	-0.173283	0.466267	0.628159
ENSG00000005812	FBXL3	26224	0.854167	0.882353	2.3338	2.78232	0.448519	0.251517	0.411084
ENSG00000005882	PDK2	5164	0.958333	1	6.52647	7.13217	0.605707	0.0851177	0.188531
ENSG00000005884	ITGA3	3675	0.8125	0.858824	2.81482	2.80477	-0.0100532	0.790838	0.874834
ENSG00000005889	ZFX	7543	0.833333	0.835294	2.43817	2.2027	-0.23547	0.684618	0.801868
ENSG00000005893	LAMP2	3920	0.979167	1	5.40592	5.71535	0.309431	0.544046	0.69427
ENSG00000005961	ITGA2B	3674	0.229167	0.211765	-1.24694	-1.51143	-0.264498	0.697196	0.810443
ENSG00000006007	GDE1	51573	0.791667	0.752941	2.51658	2.16182	-0.354767	0.683392	0.800895
ENSG00000006015	REX1BD	55049	1	1	7.04796	6.60316	-0.444806	0.000997604	0.00568835
ENSG00000006025	OSBPL7	114881	0.5625	0.552941	0.661141	0.566429	-0.0947115	0.939411	0.966637
ENSG00000006042	TMEM98	26022	0.979167	0.941176	5.69951	3.96336	-1.73615	2.90166e-08	1.00088e-06
ENSG00000006047	YBX2	51087	0.9375	1	4.87174	6.07189	1.20015	0.00136381	0.00731847
ENSG00000006062	MAP3K14	9020	0.583333	0.764706	0.811162	2.02157	1.2104	0.0290634	0.0840205
ENSG00000006118	TMEM132A	54972	0.541667	0.129412	0.161078	-1.88744	-2.04852	1.4574e-07	3.98985e-06
ENSG00000006125	AP2B1	163	1	1	5.87878	6.50294	0.624159	0.000107884	0.000952461
ENSG00000006128	TAC1	6863	0.604167	0.647059	0.561251	0.806744	0.245493	0.622236	0.756134
ENSG00000006194	ZNF263	10127	0.854167	0.788235	2.89373	2.05611	-0.837617	0.041111	0.109369
ENSG00000006282	SPATA20	64847	0.9375	0.717647	3.75784	1.95957	-1.79827	0.00188714	0.00949738
ENSG00000006283	CACNA1G	8913	0.208333	0.0117647	-1.42964	-2.2789	-0.849264	8.56326e-05	0.000793794
ENSG00000006327	TNFRSF12A	51330	0.541667	0.529412	0.423004	-0.0504257	-0.473429	0.393946	0.560341
ENSG00000006377	DLX6	1750	0.958333	1	6.26782	7.48396	1.21614	5.27993e-08	1.71036e-06
ENSG00000006432	MAP3K9	4293	0.458333	0.658824	-0.0938695	0.958123	1.05199	0.0471132	0.121152
ENSG00000006451	RALA	5898	1	1	6.17788	6.51936	0.341485	0.000101828	0.000911388
ENSG00000006453	BAIAP2L1	55971	1	1	9.96258	10.4063	0.443764	0.00101435	0.00576213
ENSG00000006459	KDM7A	80853	0.5625	0.764706	0.652176	1.95099	1.29882	0.0214994	0.0664878
ENSG00000006530	AGK	55750	1	1	6.00961	7.1153	1.10569	2.50693e-08	8.8316e-07
ENSG00000006534	ALDH3B1	221	0.0625	0	-2.11268	-2.32193	-0.209246	0.0207082	0.0646018
ENSG00000006555	TTC22	55001	0.333333	0.223529	-0.839251	-1.3312	-0.491948	0.192422	0.339497
ENSG00000006576	PHTF2	57157	0.916667	0.894118	2.83587	2.90187	0.0659953	0.492291	0.650856
ENSG00000006606	CCL26	10344	0.354167	0.211765	-1.06101	-1.71846	-0.657453	0.0452795	0.1175
ENSG00000006607	FARP2	9855	0.770833	0.752941	1.55029	1.82505	0.274759	0.439085	0.602937
ENSG00000006625	GGCT	79017	0.9375	0.941176	4.01395	4.06819	0.0542402	0.981309	0.989968
ENSG00000006634	DBF4	10926	0.979167	0.988235	5.16834	5.70059	0.532257	0.0175352	0.0566977
ENSG00000006638	TBXA2R	6915	0.229167	0.129412	-1.58234	-1.84048	-0.258142	0.165587	0.305743
ENSG00000006652	IFRD1	3475	0.75	0.494118	2.01517	0.0118094	-2.00336	0.000108419	0.000956721
ENSG00000006695	COX10	1352	0.958333	0.988235	5.05554	5.36557	0.310031	0.938383	0.96582
ENSG00000006704	GTF2IRD1	9569	0.708333	0.741176	1.5507	1.85276	0.302059	0.597756	0.73603
ENSG00000006712	PAF1	54623	1	0.988235	6.33063	6.37703	0.0464026	0.305992	0.471496
ENSG00000006715	VPS41	27072	0.875	0.917647	2.84088	3.35036	0.509476	0.153511	0.289173
ENSG00000006740	ARHGAP44	9912	0.916667	0.988235	4.25849	4.82693	0.568435	0.0967397	0.207099
ENSG00000006744	ELAC2	60528	0.979167	1	6.50357	7.27088	0.767308	0.00550571	0.0225107
ENSG00000006747	SCIN	85477	0.208333	0.211765	-1.46565	-1.57304	-0.107394	0.965919	0.981578
ENSG00000006756	ARSD	414	0.541667	0.176471	0.280425	-1.64349	-1.92392	3.25885e-06	5.44479e-05
ENSG00000006757	PNPLA4	8228	1	0.952941	4.89383	4.73332	-0.160518	0.454904	0.616976
ENSG00000006788	MYH13	8735	0.791667	0.917647	2.68618	3.30345	0.617267	0.206259	0.357053
ENSG00000006831	ADIPOR2	79602	0.979167	0.976471	4.52728	4.9455	0.418222	0.00864082	0.0322478
ENSG00000006837	CDKL3	51265	0.791667	0.788235	1.3081	1.38095	0.0728557	0.663276	0.785842
ENSG00000007038	PRSS21	10942	0.979167	1	5.74427	5.71483	-0.0294412	0.299399	0.46493
ENSG00000007047	MARK4	57787	0.958333	0.941176	4.37141	4.10268	-0.268734	0.454877	0.616976
ENSG00000007080	CCDC124	115098	1	1	7.38211	7.30131	-0.0808033	0.288622	0.453033
ENSG00000007168	PAFAH1B1	5048	1	1	6.25315	6.4502	0.197048	0.013818	0.046924
ENSG00000007171	NOS2	4843	0.75	0.952941	2.52297	4.99146	2.46849	2.46552e-07	6.25079e-06
ENSG00000007174	DNAH9	1770	0.979167	0.976471	4.27304	4.59868	0.325643	0.190379	0.337084
ENSG00000007202	KIAA0100	9703	0.875	0.764706	2.4699	1.54148	-0.928423	0.0434095	0.1139
ENSG00000007237	GAS7	8522	0.958333	0.952941	3.91887	4.83547	0.916596	0.00131952	0.00711269
ENSG00000007255	TRAPPC6A	79090	1	1	4.394	4.14884	-0.245166	0.0809576	0.181282
ENSG00000007264	MATK	4145	0.958333	0.976471	5.06348	5.19434	0.130858	0.452081	0.614525
ENSG00000007341	ST7L	54879	0.8125	0.835294	2.29175	2.27973	-0.0120166	0.97939	0.988415
ENSG00000007350	TKTL1	8277	1	1	9.00006	9.43818	0.438116	0.00752248	0.0288367
ENSG00000007372	PAX6	5080	0.520833	0.576471	0.212357	0.760454	0.548097	0.325497	0.491975
ENSG00000007376	RPUSD1	113000	0.833333	0.8	3.2748	3.05831	-0.216485	0.687757	0.803864
ENSG00000007384	RHBDF1	64285	0.854167	0.858824	2.94365	3.34965	0.406	0.311976	0.47817
ENSG00000007392	LUC7L	55692	0.958333	0.988235	5.16292	4.79392	-0.368997	0.0265309	0.0783324
ENSG00000007402	CACNA2D2	9254	0.979167	1	6.00408	6.55394	0.549855	0.00691535	0.0270048
ENSG00000007516	BAIAP3	8938	0.770833	0.894118	2.58393	3.59287	1.00894	0.0715308	0.165221
ENSG00000007520	TSR3	115939	1	0.964706	5.66081	4.66177	-0.999039	0.000160796	0.00130616
ENSG00000007541	PIGQ	9091	0.958333	0.941176	4.74282	4.88286	0.140038	0.878972	0.930691
ENSG00000007545	CRAMP1	57585	0.854167	0.788235	2.30881	1.90445	-0.404364	0.398805	0.565174
ENSG00000007866	TEAD3	7005	0.958333	0.882353	3.69546	3.76896	0.0735068	0.167515	0.308212
ENSG00000007923	DNAJC11	55735	0.9375	0.952941	4.43349	5.02466	0.591172	0.0309598	0.0880996
ENSG00000007944	MYLIP	29116	1	1	6.15724	6.93126	0.774025	4.35481e-07	1.00165e-05
ENSG00000007968	E2F2	1870	0.166667	0.258824	-1.5108	-1.3376	0.173202	0.328921	0.495371
ENSG00000008018	PSMB1	5689	1	1	7.36747	7.02918	-0.338292	4.44649e-05	0.000464264
ENSG00000008056	SYN1	6853	0.666667	0.564706	1.38591	0.42922	-0.956691	0.0784829	0.177314
ENSG00000008083	JARID2	3720	1	1	5.69102	6.51663	0.82561	3.5573e-05	0.000387446
ENSG00000008086	CDKL5	6792	0.791667	0.941176	1.51203	2.65059	1.13856	0.00439724	0.0188388
ENSG00000008118	CAMK1G	57172	0.479167	0.141176	0.500566	-1.72188	-2.22245	8.28303e-06	0.000115733
ENSG00000008128	CDK11A	728642	1	1	5.50124	5.97524	0.473991	0.00138624	0.00741801
ENSG00000008130	NADK	65220	0.958333	0.917647	4.24094	3.75102	-0.489919	0.321673	0.4878
ENSG00000008196	TFAP2B	7021	0.833333	0.952941	1.20702	2.98225	1.77523	5.90704e-06	8.79428e-05
ENSG00000008197	TFAP2D	83741	0.125	0.258824	-1.85918	-1.30634	0.552842	0.0722033	0.166541
ENSG00000008226	DLEC1	9940	0.854167	0.894118	3.56799	3.77438	0.206395	0.840207	0.906842
ENSG00000008256	CYTH3	9265	0.895833	0.952941	3.90328	4.41488	0.511601	0.427064	0.592254
ENSG00000008277	ADAM22	53616	0.375	0.435294	-0.852754	-0.599473	0.253281	0.454943	0.616976
ENSG00000008282	SYPL1	6856	1	1	7.23836	7.73261	0.494251	0.0174243	0.0564095
ENSG00000008283	CYB561	1534	0.5625	0.717647	0.637253	1.81888	1.18163	0.0365685	0.100475
ENSG00000008294	SPAG9	9043	0.9375	0.882353	3.52187	2.88752	-0.634355	0.0537598	0.133122
ENSG00000008300	CELSR3	1951	0.375	0.470588	-0.608012	-0.298679	0.309333	0.350586	0.517117
ENSG00000008311	AASS	10157	0.916667	0.541176	3.47408	0.217029	-3.25705	1.77641e-10	1.25161e-08
ENSG00000008324	SS18L2	51188	0.958333	0.988235	4.43634	4.30465	-0.131691	0.0437064	0.114413
ENSG00000008382	MPND	84954	0.875	0.941176	3.77545	3.9418	0.166343	0.486482	0.646164
ENSG00000008394	MGST1	4257	0.895833	0.964706	2.58487	3.79878	1.21392	0.000376137	0.00257821
ENSG00000008405	CRY1	1407	0.75	0.917647	2.03318	3.85154	1.81836	6.7383e-06	9.76006e-05
ENSG00000008438	PGLYRP1	8993	0.270833	0.317647	-1.39862	-1.48351	-0.0848921	0.855651	0.91656
ENSG00000008441	NFIX	4784	0.854167	0.611765	2.19598	0.839679	-1.3563	0.0106035	0.0381081
ENSG00000008513	ST3GAL1	6482	0.645833	0.670588	1.20494	1.18354	-0.0214007	0.925762	0.958452
ENSG00000008517	IL32	9235	0.604167	0.211765	1.11372	-1.49299	-2.6067	1.44245e-07	3.96686e-06
ENSG00000008710	PKD1	5310	0.8125	0.788235	2.66866	2.3824	-0.286261	0.473088	0.63411
ENSG00000008735	MAPK8IP2	23542	0.5625	0.447059	0.62269	-0.00784255	-0.630532	0.246999	0.405927
ENSG00000008838	MED24	9862	0.854167	0.858824	3.30526	3.00492	-0.300336	0.415628	0.581982
ENSG00000008853	RHOBTB2	23221	0.666667	0.564706	1.25395	0.430618	-0.823332	0.123139	0.245949
ENSG00000008869	HEATR5B	54497	1	1	5.47339	5.73843	0.265048	0.0215627	0.0666042
ENSG00000008952	SEC62	7095	1	1	5.41258	5.14043	-0.27215	0.114911	0.233731
ENSG00000008988	RPS20	6224	1	1	8.33921	7.74738	-0.591829	2.76797e-06	4.75578e-05
ENSG00000009307	CSDE1	7812	1	1	7.9109	8.65673	0.74583	1.62609e-06	3.07266e-05
ENSG00000009335	UBE3C	9690	0.895833	0.941176	3.04092	3.54903	0.508112	0.155652	0.292116
ENSG00000009413	REV3L	5980	0.958333	0.952941	4.02838	4.53255	0.504177	0.0593232	0.143371
ENSG00000009694	TENM1	10178	0.395833	0.564706	-0.520504	0.022882	0.543386	0.169097	0.309965
ENSG00000009780	FAM76A	199870	0.958333	1	4.67405	5.32155	0.6475	0.00840612	0.0315133
ENSG00000009830	POMT2	29954	0.854167	0.858824	3.19278	3.23518	0.0424028	0.945761	0.969819
ENSG00000009844	VTA1	51534	1	1	6.95645	7.43597	0.479522	0.000208767	0.00160871
ENSG00000009950	MLXIPL	51085	0.75	0.647059	1.77084	1.29965	-0.471189	0.320922	0.48724
ENSG00000009954	BAZ1B	9031	1	1	6.68483	7.12179	0.436964	0.00010381	0.000926392
ENSG00000010017	RANBP9	10048	0.958333	0.964706	3.93814	4.34842	0.410276	0.135645	0.264189
ENSG00000010030	ETV7	51513	0.1875	0.117647	-1.28305	-1.90144	-0.618387	0.201226	0.350775
ENSG00000010072	SPRTN	83932	0.541667	0.741176	0.487494	2.12867	1.64117	0.00139858	0.00747087
ENSG00000010165	EEF1AKNMT	51603	0.916667	0.976471	4.36778	5.01104	0.643258	0.0986303	0.209949
ENSG00000010219	DYRK4	8798	0.979167	1	5.24596	5.65032	0.404354	0.0221017	0.0678887
ENSG00000010244	ZNF207	7756	1	1	7.78624	8.24926	0.463017	0.00333394	0.0151096
ENSG00000010256	UQCRC1	7384	1	1	8.9123	8.78235	-0.129947	0.0606091	0.145523
ENSG00000010270	STARD3NL	83930	1	1	5.2597	5.7062	0.446506	0.0324603	0.0915538
ENSG00000010278	CD9	928	1	1	6.30074	6.51055	0.209806	0.27604	0.438393
ENSG00000010292	NCAPD2	9918	0.541667	0.611765	0.065822	0.318482	0.25266	0.513331	0.667993
ENSG00000010295	IFFO1	25900	0.729167	0.694118	1.86845	1.68743	-0.181011	0.730829	0.834538
ENSG00000010318	PHF7	51533	0.854167	0.905882	2.58629	3.20509	0.618802	0.0671313	0.157297
ENSG00000010322	NISCH	11188	0.958333	0.952941	5.02084	4.73506	-0.285782	0.853178	0.915158
ENSG00000010327	STAB1	23166	0.666667	0.717647	1.7723	1.4197	-0.352604	0.294927	0.459796
ENSG00000010361	FUZ	80199	0.895833	0.8	3.30602	2.40845	-0.897565	0.0181822	0.0583125
ENSG00000010379	SLC6A13	6540	0.208333	0.117647	-1.61919	-1.80291	-0.183726	0.223709	0.377971
ENSG00000010404	IDS	3423	0.9375	0.941176	4.13001	3.93554	-0.194468	0.199204	0.348165
ENSG00000010438	PRSS3	5646	0.1875	0.2	-1.52574	-1.47727	0.0484745	0.889667	0.937254
ENSG00000010539	ZNF200	7752	0.9375	0.964706	4.46175	5.1737	0.711947	0.0111051	0.03952
ENSG00000010610	CD4	920	0.229167	0.152941	-1.30604	-1.5238	-0.217754	0.299443	0.464958
ENSG00000010626	LRRC23	10233	0.604167	0.552941	0.928497	0.272622	-0.655876	0.153382	0.28908
ENSG00000010803	SCMH1	22955	0.8125	0.705882	2.19331	1.31799	-0.875315	0.0594151	0.143528
ENSG00000010810	FYN	2534	0.916667	0.976471	4.03977	5.10494	1.06518	0.0101749	0.03682
ENSG00000010818	HIVEP2	3097	0.333333	0.164706	-0.754262	-1.6546	-0.900334	0.0186378	0.0593757
ENSG00000010932	FMO1	2326	0.229167	0.0588235	-1.13443	-2.16272	-1.02829	0.00279701	0.0131516
ENSG00000011007	ELOA	6924	0.916667	0.964706	4.09142	4.50907	0.417652	0.169088	0.309965
ENSG00000011009	LYPLA2	11313	1	0.988235	5.7919	5.55371	-0.238191	0.489543	0.648704
ENSG00000011021	CLCN6	1185	0.729167	0.670588	1.56399	1.03642	-0.527571	0.330841	0.497488
ENSG00000011028	MRC2	9902	0.833333	0.482353	3.11204	-0.485965	-3.59801	2.11528e-09	1.03923e-07
ENSG00000011052	NME1	654364	0.645833	0.752941	1.53719	1.68409	0.146894	0.9207	0.955006
ENSG00000011105	TSPAN9	10867	0.979167	1	5.74914	6.21567	0.466529	0.0372991	0.101866
ENSG00000011114	BTBD7	55727	0.875	0.894118	2.90498	2.53336	-0.371616	0.30124	0.466984
ENSG00000011132	APBA3	9546	0.75	0.623529	1.8355	1.18083	-0.654677	0.251093	0.410576
ENSG00000011143	MKS1	54903	0.833333	0.835294	3.68167	3.3743	-0.307377	0.24517	0.403869
ENSG00000011198	ABHD5	51099	1	1	4.89034	5.41541	0.525071	0.00964079	0.0352611
ENSG00000011201	ANOS1	3730	0.9375	0.941176	4.11102	4.33513	0.224108	0.803878	0.883028
ENSG00000011243	AKAP8L	26993	0.979167	1	6.60681	6.44978	-0.157027	0.0738855	0.169262
ENSG00000011258	MBTD1	54799	0.791667	0.847059	2.0194	2.55261	0.533211	0.222881	0.377307
ENSG00000011260	UTP18	51096	1	1	7.15307	7.34744	0.194364	0.24056	0.398296
ENSG00000011275	RNF216	54476	1	1	6.50408	6.80449	0.300408	0.0381625	0.103602
ENSG00000011295	TTC19	54902	0.958333	0.929412	4.48096	4.18069	-0.30027	0.994392	0.997576
ENSG00000011304	PTBP1	5725	1	1	7.63356	8.12462	0.491068	0.000688115	0.00418346
ENSG00000011332	DPF1	8193	0.583333	0.576471	0.749036	0.650709	-0.0983274	0.735001	0.83746
ENSG00000011347	SYT7	9066	0.4375	0.470588	-0.245357	-0.17417	0.0711872	0.77486	0.864382
ENSG00000011376	LARS2	23395	0.520833	0.694118	0.170774	1.14371	0.972937	0.0427638	0.112677
ENSG00000011405	PIK3C2A	5286	0.791667	0.894118	2.27637	2.79439	0.518017	0.503762	0.660519
ENSG00000011422	PLAUR	5329	0.833333	0.705882	2.40202	1.54167	-0.860355	0.138852	0.268573
ENSG00000011426	ANLN	54443	0.958333	1	4.21143	5.31881	1.10738	1.9515e-05	0.000235559
ENSG00000011451	WIZ	58525	0.833333	0.964706	3.00811	4.49484	1.48674	0.00347895	0.0156458
ENSG00000011454	RABGAP1	284423637	1	0.964706	3.48155	4.43921	0.95766	0.000762174	0.00454433
ENSG00000011465	DCN	1634	1	0.988235	7.95351	4.92856	-3.02495	1.76098e-14	6.81085e-12
ENSG00000011485	PPP5C	5536	1	0.988235	6.22127	6.33785	0.116579	0.440897	0.604415
ENSG00000011523	CEP68	23177	0.895833	0.882353	3.32416	3.54794	0.22378	0.366789	0.534425
ENSG00000011566	MAP4K3	8491	0.708333	0.682353	1.40702	0.8651	-0.541924	0.104403	0.218042
ENSG00000011638	TMEM159	57146	1	1	5.77183	5.92351	0.151679	0.338023	0.505352
ENSG00000012048	BRCA1	672	0.979167	0.952941	3.69892	4.38652	0.687599	0.000264955	0.00193576
ENSG00000012061	ERCC1	2067	1	0.988235	6.0144	5.46077	-0.553632	0.000948895	0.00545337
ENSG00000012124	CD22	933	0.8125	0.164706	2.89574	-1.62664	-4.52238	2.02879e-15	1.23793e-12
ENSG00000012171	SEMA3B	7869	0.6875	0.341176	1.98898	-0.865156	-2.85413	2.65519e-07	6.64823e-06
ENSG00000012174	MBTPS2	51360	0.75	0.670588	1.24916	0.869975	-0.379183	0.415287	0.581594
ENSG00000012211	PRICKLE3	4007	0.1875	0.211765	-1.28643	-1.25911	0.0273128	0.80515	0.883954
ENSG00000012232	EXTL3	2137	0.666667	0.894118	2.05613	3.1976	1.14147	0.113707	0.232138
ENSG00000012504	NR1H4	9971	1	1	6.07092	6.11162	0.0407017	0.776838	0.865545
ENSG00000012660	ELOVL5	60481	1	1	6.40617	6.75344	0.347268	0.00542689	0.0222385
ENSG00000012779	ALOX5	240	0.395833	0.188235	-0.54688	-1.60733	-1.06045	0.00603244	0.0242498
ENSG00000012822	CALCOCO1	57658	0.979167	0.952941	5.212	5.15813	-0.053874	0.805707	0.883954
ENSG00000012963	UBR7	55148	0.958333	1	4.69676	5.78162	1.08486	2.07825e-05	0.000248059
ENSG00000012983	MAP4K5	11183	0.958333	0.941176	3.80041	3.28937	-0.51104	0.117059	0.236986
ENSG00000013016	EHD3	30845	0.604167	0.623529	0.958343	1.27046	0.312117	0.610883	0.746881
ENSG00000013275	PSMC4	5704	0.979167	1	6.69738	7.15676	0.459386	0.0432207	0.113503
ENSG00000013288	MAN2B2	23324	0.770833	0.482353	1.80892	0.157427	-1.65149	0.00346401	0.015594
ENSG00000013297	CLDN11	5010	0.916667	0.635294	4.69041	0.559192	-4.13122	4.23148e-12	5.23265e-10
ENSG00000013306	SLC25A39	51629	1	1	8.19927	7.86615	-0.333125	0.0223757	0.0685217
ENSG00000013364	MVP	9961	1	1	8.47465	8.68845	0.213801	0.06525	0.153901
ENSG00000013374	NUB1	51667	1	1	6.26625	6.6072	0.340944	0.0161398	0.0530353
ENSG00000013375	PGM3	5238	1	1	6.44878	6.77114	0.322361	0.126104	0.250335
ENSG00000013392	RWDD2A	112611	0.8125	0.894118	2.12977	3.18057	1.0508	0.00142404	0.00758459
ENSG00000013441	CLK1	1195	1	1	7.53545	7.61735	0.0818969	0.389957	0.556365
ENSG00000013503	POLR3B	55703	0.8125	0.917647	2.44649	3.29002	0.843522	0.133486	0.261195
ENSG00000013523	ANGEL1	23357	0.8125	0.835294	2.45666	2.28233	-0.174331	0.691436	0.806786
ENSG00000013561	RNF14	9604	0.979167	1	6.00205	6.94183	0.939776	4.62932e-05	0.000480331
ENSG00000013563	DNASE1L1	1774	0.708333	0.647059	2.01097	1.3443	-0.666665	0.152931	0.28847
ENSG00000013573	DDX11	1663	0.979167	1	4.98541	5.95499	0.969584	0.000323489	0.00227569
ENSG00000013583	HEBP1	50865	0.916667	0.882353	3.87301	2.42192	-1.45109	2.42365e-07	6.17047e-06
ENSG00000013588	GPRC5A	9052	0.979167	0.952941	5.17299	5.21211	0.0391194	0.278098	0.44095
ENSG00000013619	MAMLD1	10046	0.4375	0.0941176	-0.195502	-1.94811	-1.75261	3.11911e-06	5.24507e-05
ENSG00000013810	TACC3	10460	1	1	7.81173	8.50531	0.693572	0.000279922	0.00202082
ENSG00000014123	UFL1	23376	0.958333	0.988235	4.11491	4.7987	0.683795	0.018797	0.0597802
ENSG00000014138	POLA2	23649	0.958333	0.952941	4.87851	5.10348	0.224978	0.342747	0.509514
ENSG00000014164	ZC3H3	23144	1	1	7.16038	7.66869	0.508314	8.06655e-05	0.000759367
ENSG00000014216	CAPN1	823	0.875	0.764706	3.45161	2.21545	-1.23617	0.0062468	0.024957
ENSG00000014257	ACPP	55	0.375	0.494118	-0.949732	0.0393692	0.989101	0.0436035	0.11431
ENSG00000014641	MDH1	4190	1	1	8.13736	8.2514	0.114042	0.31044	0.476459
ENSG00000014824	SLC30A9	10463	0.916667	0.952941	3.58919	3.93537	0.346186	0.170529	0.311674
ENSG00000014914	MTMR11	10903	0.645833	0.235294	0.376361	-1.4678	-1.84416	1.93751e-06	3.53615e-05
ENSG00000014919	COX15	1355	0.875	0.882353	3.03907	3.31858	0.279508	0.359295	0.5268
ENSG00000015133	CCDC88C	440193	1	1	5.98837	6.16665	0.178277	0.504382	0.660519
ENSG00000015153	YAF2	10138	0.875	0.894118	2.52522	2.67683	0.151613	0.97195	0.984371
ENSG00000015171	ZMYND11	10771	0.958333	0.988235	4.51485	5.4118	0.896948	0.0027349	0.0129002
ENSG00000015413	DPEP1	1800	0.895833	0.952941	4.59915	4.78865	0.189494	0.816583	0.891124
ENSG00000015475	BID	637	0.8125	0.729412	2.78235	1.8979	-0.884451	0.0349521	0.0969423
ENSG00000015479	MATR3	9782	1	1	5.95089	6.32371	0.372826	0.0255889	0.0763424
ENSG00000015532	XYLT2	64132	0.916667	0.952941	3.68053	3.67616	-0.00436599	0.429817	0.594636
ENSG00000015568	RGPD5	84220	0.833333	0.752941	2.46766	2.13242	-0.335237	0.808365	0.885956
ENSG00000015676	NUDCD3	23386	0.9375	0.823529	3.88652	2.74137	-1.14515	0.0422439	0.111741
ENSG00000016082	ISL1	3670	0.645833	0.847059	1.53077	3.1679	1.63712	0.00100534	0.00572214
ENSG00000016391	CHDH	55349	0.645833	0.623529	0.858526	1.11106	0.252538	0.629046	0.761085
ENSG00000016402	IL20RA	53832	0.625	0.647059	1.43954	1.25307	-0.186467	0.582665	0.723772
ENSG00000016864	GLT8D1	55830	1	0.905882	4.40473	3.7119	-0.692833	0.184067	0.328862
ENSG00000017260	ATP2C1	27032	0.979167	1	4.26768	5.38202	1.11434	3.14632e-05	0.00034981
ENSG00000017427	IGF1	3479	0.416667	0.105882	-0.230442	-1.96104	-1.73059	1.29317e-05	0.000166247
ENSG00000017483	SLC38A5	92745	0.375	0.0588235	-0.0813071	-2.07631	-1.99501	2.00817e-06	3.6359e-05
ENSG00000017797	RALBP1	10928	1	1	5.41026	5.59834	0.188076	0.161973	0.300657
ENSG00000018189	RUFY3	22902	1	1	5.99033	5.55592	-0.434417	0.0265317	0.0783324
ENSG00000018236	CNTN1	1272	0.708333	0.694118	1.43807	1.18929	-0.248778	0.557456	0.704939
ENSG00000018408	WWTR1	25937	0.854167	0.435294	2.82822	-0.627184	-3.4554	3.68356e-10	2.35774e-08
ENSG00000018510	AGPS	8540	0.895833	0.882353	2.56667	3.07919	0.512521	0.0248731	0.0747221
ENSG00000018610	CXorf56	63932	0.958333	1	4.89503	5.44532	0.550294	0.588427	0.728122
ENSG00000018699	TTC27	55622	0.5625	0.529412	0.264632	0.349001	0.0843681	0.970513	0.984046
ENSG00000018869	ZNF582	147948	0.833333	0.8	2.11218	1.99161	-0.120576	0.845334	0.910499
ENSG00000019102	VSIG2	23584	0.333333	0.282353	-0.863991	-1.01343	-0.149437	0.57339	0.71661
ENSG00000019144	PHLDB1	23187	0.8125	0.823529	3.34723	3.04822	-0.299014	0.301261	0.466984
ENSG00000019186	CYP24A1	1591	0.25	0.270588	-1.52279	-1.42588	0.0969033	0.718933	0.826405
ENSG00000019485	PRDM11	56981	0.458333	0.364706	0.0628084	-0.765924	-0.828732	0.127817	0.252797
ENSG00000019505	SYT13	57586	0.104167	0.105882	-1.87736	-1.93177	-0.0544111	1	1
ENSG00000019549	SNAI2	6591	0.541667	0.294118	0.335293	-1.19263	-1.52793	0.00140439	0.00749089
ENSG00000019582	CD74	972	0.854167	0.788235	4.68579	2.1591	-2.52669	7.19774e-05	0.000690549
ENSG00000019991	HGF	3082	0.145833	0.247059	-1.79845	-1.24262	0.555826	0.14358	0.275591
ENSG00000019995	ZRANB1	54764	0.6875	0.870588	1.1299	2.41983	1.28993	0.0074561	0.0286669
ENSG00000020129	NCDN	23154	0.854167	0.835294	3.10635	2.50396	-0.60239	0.285551	0.449804
ENSG00000020181	ADGRA2	25960	0.458333	0.176471	-0.0931417	-1.64305	-1.54991	0.000227683	0.00172093
ENSG00000020256	ZFP64	55734	0.979167	0.988235	5.7878	6.10423	0.316429	0.910475	0.949057
ENSG00000020426	MNAT1	4331	1	0.976471	4.11989	3.90333	-0.216561	0.528609	0.681705
ENSG00000020577	SAMD4A	23034	0.958333	1	5.02223	5.78139	0.759154	0.00527224	0.0217225
ENSG00000020633	RUNX3	864	0.104167	0.105882	-1.82288	-1.76361	0.0592624	0.919433	0.954365
ENSG00000020922	MRE11	4361	0.958333	0.964706	4.48427	4.87384	0.389564	0.0995963	0.211422
ENSG00000021300	PLEKHB1	58473	0.9375	0.976471	5.35199	5.9558	0.603815	0.253944	0.413249
ENSG00000021355	SERPINB1	1992	0.833333	0.894118	2.96726	3.51605	0.548795	0.174554	0.31698
ENSG00000021488	SLC7A9	11136	1	1	6.36743	6.80341	0.435982	0.000676436	0.00412349
ENSG00000021574	SPAST	6683	0.8125	0.894118	2.0199	2.73495	0.715049	0.212123	0.363634
ENSG00000021645	NRXN3	9369	0.9375	0.988235	3.93215	5.18099	1.24883	0.00479643	0.0201635
ENSG00000021762	OSBPL5	114879	0.833333	0.8	2.28874	2.34241	0.0536623	0.567917	0.712709
ENSG00000021776	AQR	9716	0.875	0.929412	2.86388	3.81155	0.947664	0.00298751	0.0138538
ENSG00000021826	CPS1	1373	0.583333	0.588235	0.461716	0.61483	0.153114	0.79861	0.879437
ENSG00000022267	FHL1	2273	1	0.952941	6.04091	4.83789	-1.20301	0.000208728	0.00160871
ENSG00000022277	RTF2	51507	1	1	8.83203	8.8728	0.040771	0.780432	0.868271
ENSG00000022556	NLRP2	55655	1	1	8.04937	8.93849	0.889118	9.03683e-06	0.000123926
ENSG00000022567	SLC45A4	57210	0.666667	0.611765	1.06356	0.687059	-0.376503	0.404306	0.569969
ENSG00000022840	RNF10	9921	1	1	7.66369	8.625	0.961314	1.82109e-07	4.8116e-06
ENSG00000022976	ZNF839	55778	0.6875	0.764706	1.56521	1.97932	0.414109	0.851845	0.914477
ENSG00000023041	ZDHHC6	64429	0.8125	0.776471	2.6323	1.98751	-0.644792	0.109517	0.225791
ENSG00000023171	GRAMD1B	57476	0.333333	0.0470588	-0.762375	-2.12345	-1.36108	8.63659e-06	0.000119869
ENSG00000023191	RNH1	6050	1	1	8.31823	7.75883	-0.559397	7.75576e-06	0.00010929
ENSG00000023228	NDUFS1	4719	1	0.988235	5.78373	6.1047	0.320966	0.115994	0.235197
ENSG00000023287	RB1CC1	9821	0.979167	0.941176	3.53593	4.00062	0.46469	0.0103832	0.0374271
ENSG00000023318	ERP44	23071	1	0.988235	5.87474	6.24292	0.368182	0.0288489	0.0834657
ENSG00000023330	ALAS1	211	1	1	6.49045	7.21483	0.724371	5.32744e-06	8.10394e-05
ENSG00000023445	BIRC3	330	0.25	0.0941176	-1.27023	-2.03127	-0.761039	0.0103089	0.0372467
ENSG00000023516	AKAP11	11215	0.9375	0.964706	3.91265	4.64413	0.731481	0.0266849	0.0786953
ENSG00000023572	GLRX2	51022	0.958333	0.988235	3.12046	3.58049	0.460028	0.276037	0.438393
ENSG00000023608	SNAPC1	6617	1	1	5.1111	5.58911	0.478012	0.00731499	0.0282032
ENSG00000023697	DERA	51071	0.979167	0.964706	4.52282	4.73595	0.213121	0.943974	0.969357
ENSG00000023734	STRAP	11171	1	1	7.36395	7.5107	0.146751	0.319464	0.485723
ENSG00000023839	ABCC2	1244	0.291667	0.352941	-1.11976	-0.691721	0.428041	0.291311	0.455914
ENSG00000023892	DEF6	50619	0.145833	0.188235	-1.74156	-1.5685	0.173065	0.517664	0.672245
ENSG00000023902	PLEKHO1	51177	0.875	0.858824	3.60306	2.72138	-0.881679	0.0043126	0.0185593
ENSG00000023909	GCLM	2730	0.979167	0.976471	5.04723	5.55173	0.504502	0.00011427	0.000994907
ENSG00000024048	UBR2	23304	0.8125	0.788235	1.94545	1.70264	-0.242808	0.350366	0.516891
ENSG00000024422	EHD2	30846	0.770833	0.294118	2.75818	-0.855648	-3.61383	5.13677e-10	3.14398e-08
ENSG00000024526	DEPDC1	55635	0.5	0.6	-0.0301339	0.569853	0.599987	0.149656	0.284152
ENSG00000024862	CCDC28A	25901	0.9375	0.964706	4.14489	4.3142	0.169316	0.61945	0.753907
ENSG00000025039	RRAGD	58528	0.291667	0.141176	-0.830723	-1.71549	-0.884769	0.0280976	0.0819475
ENSG00000025156	HSF2	3298	1	1	6.46671	7.28264	0.815931	1.54693e-05	0.000192735
ENSG00000025293	PHF20	51230	0.979167	1	5.22174	5.61604	0.394296	0.0493736	0.125106
ENSG00000025423	HSD17B6	8630	0.208333	0.341176	-1.35978	-0.718208	0.641575	0.130667	0.256974
ENSG00000025434	NR1H3	10062	0.9375	0.929412	3.94143	3.32208	-0.619346	0.0723409	0.166679
ENSG00000025708	TYMP	1890	0.583333	0.588235	0.366232	-0.112675	-0.478907	0.449818	0.612677
ENSG00000025770	NCAPH2	29781	0.958333	1	6.37401	6.63908	0.265071	0.614517	0.749611
ENSG00000025772	TOMM34	10953	1	1	9.08719	9.47552	0.388336	0.00405004	0.017672
ENSG00000025796	SEC63	11231	0.958333	1	5.46001	5.70932	0.24931	0.553415	0.70168
ENSG00000025800	KPNA6	23633	1	1	5.88953	6.68657	0.797034	2.34244e-07	5.97207e-06
ENSG00000026025	VIM	7431	1	1	9.35484	7.10433	-2.25051	1.22443e-16	3.17968e-13
ENSG00000026036	RTEL1	.	0.208333	0.105882	-1.4422	-1.90884	-0.466646	0.0955388	0.20543
ENSG00000026103	FAS	355	0.583333	0.164706	0.37998	-1.71497	-2.09495	3.1016e-07	7.54763e-06
ENSG00000026297	RNASET2	8635	1	1	6.58992	6.8001	0.210179	0.0544567	0.134317
ENSG00000026508	CD44	960	0.3125	0.0941176	-0.726556	-1.93305	-1.20649	0.00124814	0.0067947
ENSG00000026559	KCNG1	3755	0.1875	0.211765	-1.38473	-1.20746	0.177263	0.694048	0.808226
ENSG00000026652	AGPAT4	56895	0.729167	0.564706	1.74267	0.83522	-0.907454	0.128157	0.253359
ENSG00000026950	BTN3A1	11119	0.3125	0.0941176	-0.747086	-2.0687	-1.32161	0.000579728	0.00364737
ENSG00000027001	MIPEP	4285	0.895833	0.894118	2.98348	3.32494	0.34146	0.467475	0.629398
ENSG00000027075	PRKCH	5583	0.854167	0.952941	2.92073	4.19341	1.27268	0.00422326	0.0182787
ENSG00000027697	IFNGR1	3459	0.979167	0.894118	3.99766	3.81496	-0.182709	0.707751	0.818068
ENSG00000027847	B4GALT7	11285	0.916667	0.882353	3.26107	3.00514	-0.255937	0.594688	0.73351
ENSG00000028116	VRK2	7444	0.9375	1	3.81196	4.78167	0.969711	0.000107875	0.000952461
ENSG00000028137	TNFRSF1B	7133	0.854167	0.870588	2.59077	2.71104	0.120275	0.714454	0.822921
ENSG00000028203	VEZT	55591	0.833333	0.576471	2.31625	0.502442	-1.81381	0.000206985	0.00160039
ENSG00000028277	POU2F2	5452	0.583333	0.705882	0.710378	1.35411	0.643734	0.285533	0.449804
ENSG00000028310	BRD9	65980	0.979167	0.976471	5.50648	5.26585	-0.240629	0.330981	0.497488
ENSG00000028528	SNX1	6642	1	1	6.24776	6.27496	0.0271961	0.301586	0.467049
ENSG00000028839	TBPL1	9519	1	1	5.13573	5.60816	0.472436	0.00806447	0.0305066
ENSG00000029153	ARNTL2	56938	0.666667	0.776471	1.33906	1.82774	0.488678	0.34796	0.514831
ENSG00000029363	BCLAF1	9774	1	1	6.96109	7.05058	0.0894919	0.71654	0.824332
ENSG00000029364	SLC39A9	55334	0.645833	0.670588	1.09222	0.670874	-0.421348	0.350213	0.516734
ENSG00000029534	ANK1	286	0.541667	0.705882	0.703573	1.44718	0.743609	0.188386	0.334717
ENSG00000029639	TFB1M	51106	0.9375	0.976471	4.77914	5.07058	0.291441	0.805707	0.883954
ENSG00000029725	RABEP1	9135	1	1	6.86622	7.51303	0.646806	2.21256e-10	1.52928e-08
ENSG00000029993	HMGB3	3149	1	1	7.35643	7.68414	0.327713	0.000415347	0.00278399
ENSG00000030066	NUP160	23279	0.770833	0.741176	2.095	1.42055	-0.674452	0.15055	0.285549
ENSG00000030110	BAK1	578	0.541667	0.447059	0.940097	-0.0967874	-1.03688	0.0980989	0.209178
ENSG00000030582	GRN	2896	1	1	9.11356	9.1789	0.0653341	0.591661	0.730901
ENSG00000031003	FAM13B	51306	0.6875	0.623529	1.22215	0.628902	-0.593246	0.136784	0.265877
ENSG00000031081	ARHGAP31	57514	0.1875	0.0823529	-1.56351	-2.11216	-0.548659	0.0538734	0.133239
ENSG00000031691	CENPQ	55166	0.916667	0.952941	3.27524	4.29275	1.01751	0.000800952	0.00473248
ENSG00000031698	SARS	6301	1	1	7.70143	7.79987	0.0984484	0.178002	0.321291
ENSG00000031823	RANBP3	8498	1	1	6.63007	7.27343	0.643358	0.00115797	0.00640724
ENSG00000032219	ARID4A	5926	1	0.988235	5.42664	5.8704	0.443762	0.046211	0.119322
ENSG00000032389	EIPR1	7260	1	1	6.95946	7.37476	0.415298	0.00185088	0.00934852
ENSG00000032444	PNPLA6	10908	1	1	7.27643	7.74629	0.469863	0.0103167	0.0372467
ENSG00000032742	IFT88	8100	0.979167	0.988235	3.8648	4.82972	0.964925	0.000147737	0.00122349
ENSG00000033011	ALG1	56052	0.75	0.811765	2.64908	2.60301	-0.0460637	0.632823	0.764031
ENSG00000033030	ZCCHC8	55596	0.895833	0.917647	3.3539	3.45528	0.10138	0.782153	0.86985
ENSG00000033050	ABCF2	10061	0.9375	0.941176	3.57317	3.92844	0.355265	0.243337	0.401615
ENSG00000033100	CHPF2	54480	0.541667	0.317647	0.234383	-0.828378	-1.06276	0.0188222	0.0598409
ENSG00000033122	LRRC7	57554	0.916667	0.952941	2.86967	3.64454	0.77487	0.00783698	0.0297975
ENSG00000033170	FUT8	2530	0.979167	0.976471	4.53245	5.08594	0.553482	0.00617413	0.0247112
ENSG00000033178	UBA6	55236	0.958333	0.988235	4.87315	5.02045	0.147297	0.463434	0.625183
ENSG00000033327	GAB2	9846	1	1	6.86965	7.23963	0.369979	0.00265217	0.0126075
ENSG00000033627	ATP6V0A1	535	0.916667	0.988235	4.02677	5.00067	0.973906	0.00795176	0.0301451
ENSG00000033800	PIAS1	8554	1	1	8.21634	8.87052	0.654188	3.14632e-05	0.00034981
ENSG00000033867	SLC4A7	9497	0.979167	0.988235	4.37945	5.46414	1.08469	5.75842e-06	8.62956e-05
ENSG00000034053	APBA2	321	0.833333	0.917647	3.49025	4.26044	0.770192	0.0721808	0.166511
ENSG00000034152	MAP2K3	5606	0.6875	0.741176	1.59464	2.12479	0.530151	0.321082	0.487442
ENSG00000034239	EFCAB1	79645	0.333333	0.0352941	-0.770131	-2.22692	-1.45679	1.64507e-06	3.10209e-05
ENSG00000034510	TMSB10	9168	1	1	6.87389	4.32719	-2.5467	2.04301e-15	1.23793e-12
ENSG00000034533	ASTE1	28990	0.6875	0.729412	1.54786	1.67541	0.127554	0.98109	0.989816
ENSG00000034677	RNF19A	25897	0.854167	0.905882	3.00678	3.20883	0.202055	0.723362	0.829511
ENSG00000034693	PEX3	8504	0.979167	0.988235	4.63885	4.73256	0.093712	0.360941	0.528446
ENSG00000034713	GABARAPL2	11345	1	1	8.56521	8.84822	0.283014	5.01656e-05	0.000513174
ENSG00000035115	SH3YL1	26751	0.916667	0.964706	3.80922	4.08994	0.280717	0.695632	0.809109
ENSG00000035141	FAM136A	84908	1	1	6.73323	7.18766	0.454431	0.000233183	0.00174941
ENSG00000035403	VCL	7414	0.875	0.917647	3.16887	3.43057	0.2617	0.748157	0.846372
ENSG00000035499	DEPDC1B	55789	0.416667	0.658824	-0.323231	1.0509	1.37413	0.00439878	0.018841
ENSG00000035664	DAPK2	23604	0.645833	0.576471	0.798352	0.770373	-0.0279786	0.998069	0.999506
ENSG00000035681	NSMAF	8439	0.458333	0.317647	-0.240807	-0.956565	-0.715758	0.0884673	0.194199
ENSG00000035687	ADSS	159	1	1	5.08595	5.9281	0.842149	5.22151e-05	0.000529545
ENSG00000035862	TIMP2	7077	1	1	6.5179	5.40136	-1.11654	1.21191e-07	3.48028e-06
ENSG00000035928	RFC1	5981	1	1	6.25505	6.475	0.219943	0.0298941	0.0857528
ENSG00000036054	TBC1D23	55773	0.979167	1	4.51848	5.64114	1.12266	5.95341e-06	8.82716e-05
ENSG00000036257	CUL3	8452	1	1	5.57305	6.05701	0.483958	0.00132018	0.00711269
ENSG00000036448	MYOM2	9172	0.8125	0.894118	3.16713	3.58452	0.417386	0.973806	0.98574
ENSG00000036530	CYP46A1	10858	0.916667	0.964706	3.62372	3.85699	0.233267	0.773234	0.863505
ENSG00000036549	AC118549.1	26009	0.666667	0.576471	0.719434	0.153208	-0.566226	0.192882	0.340144
ENSG00000036672	USP2	9099	1	1	7.90802	8.74063	0.832612	6.18967e-12	7.16661e-10
ENSG00000037042	TUBG2	27175	0.958333	1	4.5928	5.36252	0.769715	0.0352128	0.0974132
ENSG00000037241	RPL26L1	51121	1	1	4.71375	4.86745	0.153705	0.372131	0.539355
ENSG00000037280	FLT4	2324	0.291667	0.141176	-0.992029	-1.67642	-0.684387	0.0380688	0.103501
ENSG00000037474	NSUN2	54888	0.875	0.952941	3.29473	4.03712	0.742384	0.0893825	0.195694
ENSG00000037637	FBXO42	54455	0.875	0.858824	3.62872	3.64154	0.0128132	0.581519	0.722987
ENSG00000037749	MFAP3	4238	0.375	0.341176	-1.01289	-0.985963	0.0269233	0.901787	0.944062
ENSG00000037757	MRI1	84245	0.5	0.423529	0.190075	-0.492615	-0.68269	0.165401	0.305661
ENSG00000037897	METTL1	4234	0.979167	0.905882	4.29387	3.94138	-0.352486	0.359638	0.527113
ENSG00000037965	HOXC8	3224	0.208333	0.0470588	-1.34729	-2.20191	-0.854613	0.00237493	0.0115185
ENSG00000038002	AGA	175	0.645833	0.564706	1.14956	0.623241	-0.526316	0.223466	0.377748
ENSG00000038210	PI4K2B	55300	0.708333	0.752941	0.974635	1.62124	0.646606	0.0608279	0.145952
ENSG00000038219	BOD1L1	259282	0.791667	0.741176	1.74433	1.34027	-0.404062	0.188866	0.335175
ENSG00000038274	MAT2B	27430	1	1	8.33962	9.29386	0.954238	1.82109e-07	4.8116e-06
ENSG00000038295	TLL1	7092	0.895833	0.882353	2.66063	3.07999	0.419363	0.119027	0.240274
ENSG00000038358	EDC4	23644	0.854167	0.976471	3.54633	4.72827	1.18193	0.0139849	0.0473371
ENSG00000038382	TRIO	7204	0.9375	0.952941	3.88664	3.94472	0.058085	0.878972	0.930691
ENSG00000038427	VCAN	1462	0.25	0.0117647	-1.21135	-2.25703	-1.04568	1.1025e-05	0.000144806
ENSG00000038532	CLEC16A	23274	1	1	6.79212	7.47079	0.678674	2.35786e-09	1.14602e-07
ENSG00000038945	MSR1	4481	0.854167	0.917647	0.506096	1.63366	1.12757	0.000242102	0.00180144
ENSG00000039068	CDH1	999	0.875	0.964706	3.51262	4.41107	0.898446	0.0199945	0.0629094
ENSG00000039123	MTREX	23517	0.9375	0.964706	3.80631	4.23622	0.429909	0.0898783	0.196286
ENSG00000039139	DNAH5	1767	0.354167	0.564706	-0.679012	0.361229	1.04024	0.0251015	0.0751847
ENSG00000039319	ZFYVE16	9765	0.708333	0.552941	1.04397	0.119941	-0.924033	0.0431763	0.113503
ENSG00000039523	RIPOR1	79567	0.645833	0.364706	1.09439	-0.60874	-1.70313	0.000763649	0.00455135
ENSG00000039560	RAI14	26064	0.916667	0.929412	3.61641	3.79311	0.176702	0.581907	0.723028
ENSG00000039600	SOX30	11063	0.75	0.941176	2.39091	3.63912	1.24821	0.00195057	0.00977328
ENSG00000039650	PNKP	11284	0.9375	0.882353	3.81365	3.43282	-0.38083	0.449064	0.612098
ENSG00000040199	PHLPP2	23035	0.541667	0.647059	0.723073	0.975558	0.252486	0.814729	0.890634
ENSG00000040275	SPDL1	54908	0.979167	1	6.43162	7.2035	0.771886	0.000146352	0.00121257
ENSG00000040341	STAU2	27067	1	0.988235	5.02535	5.49174	0.466389	0.00155239	0.00812536
ENSG00000040487	SLC66A1	54896	0.770833	0.729412	1.97379	1.98712	0.0133306	0.846405	0.911058
ENSG00000040531	CTNS	1497	0.958333	0.964706	4.67667	5.27982	0.603143	0.0165556	0.0541169
ENSG00000040608	RTN4R	65078	0.854167	0.941176	3.57588	4.80252	1.22665	0.000275966	0.002001
ENSG00000040633	PHF23	79142	0.895833	0.858824	3.45467	3.07934	-0.375324	0.534332	0.686631
ENSG00000040731	CDH10	1008	0.229167	0.388235	-1.59224	-0.555653	1.03659	0.020017	0.0629094
ENSG00000040933	INPP4A	3631	0.625	0.635294	0.99988	1.03382	0.0339411	0.963579	0.980406
ENSG00000041353	RAB27B	5874	0.9375	0.941176	3.1522	4.41153	1.25934	0.000252841	0.00186532
ENSG00000041357	PSMA4	5685	1	1	7.08484	7.33852	0.253676	0.0195192	0.0616755
ENSG00000041515	MYO16	23026	0.895833	1	2.9752	4.22641	1.2512	0.000160747	0.00130616
ENSG00000041802	LSG1	55341	0.958333	0.988235	4.75541	4.84084	0.0854292	0.938383	0.96582
ENSG00000041880	PARP3	10039	0.229167	0.0352941	-1.1874	-2.23248	-1.04508	0.000338169	0.00235797
ENSG00000041988	THAP3	90326	0.916667	0.976471	4.80593	4.64116	-0.16477	0.0044892	0.0191457
ENSG00000042062	RIPOR3	140876	0.708333	0.905882	2.16497	3.81392	1.64896	0.000553127	0.00351646
ENSG00000042088	TDP1	55775	1	1	6.87567	7.61353	0.737865	3.48888e-07	8.30115e-06
ENSG00000042286	AIFM2	84883	0.729167	0.717647	1.82735	1.37804	-0.449306	0.285513	0.449804
ENSG00000042317	SPATA7	55812	1	1	7.08738	7.53167	0.444291	0.00028505	0.00205132
ENSG00000042429	MED17	9440	0.6875	0.764706	1.87848	2.14852	0.270042	0.822297	0.89518
ENSG00000042445	RETSAT	54884	0.6875	0.623529	1.26785	0.959139	-0.308707	0.395016	0.561342
ENSG00000042493	CAPG	822	0.208333	0.129412	-1.17641	-1.77599	-0.599579	0.161879	0.300606
ENSG00000042753	AP2S1	1175	1	1	6.15551	5.66223	-0.493284	0.00182171	0.00923712
ENSG00000042781	USH2A	7399	0.8125	0.929412	1.75345	2.8842	1.13075	0.00120669	0.00660698
ENSG00000042813	ZPBP	11055	0.333333	0.223529	-1.172	-1.66895	-0.496947	0.115111	0.234059
ENSG00000042832	TG	7038	0.0416667	0.141176	-2.20439	-1.69859	0.505794	0.0666752	0.156511
ENSG00000042980	ADAM28	10863	0.479167	0.576471	-0.305331	0.431218	0.736549	0.122309	0.244753
ENSG00000043039	BARX2	8538	0.958333	0.976471	4.87076	5.24317	0.37241	0.282277	0.446088
ENSG00000043093	DCUN1D1	54165	1	1	5.48622	6.00404	0.517816	7.31381e-05	0.00069827
ENSG00000043143	JADE2	23338	0.458333	0.258824	-0.181976	-1.09762	-0.915639	0.0245981	0.0740184
ENSG00000043355	ZIC2	7546	0.520833	0.576471	-0.183035	0.395746	0.578781	0.196299	0.344698
ENSG00000043514	TRIT1	54802	0.8125	0.823529	2.30971	3.00523	0.695515	0.0400367	0.107262
ENSG00000043591	ADRB1	153	0.25	0.352941	-1.36184	-0.830462	0.531376	0.161287	0.299629
ENSG00000044090	CUL7	9820	0.5	0.176471	0.0555091	-1.58806	-1.64357	5.91836e-05	0.000585651
ENSG00000044115	CTNNA1	1495	1	1	6.41652	6.80803	0.391504	0.00583141	0.023572
ENSG00000044446	PHKA2	5256	0.979167	0.988235	5.04373	5.4172	0.373469	0.153027	0.28862
ENSG00000044459	CNTLN	54875	0.9375	0.952941	3.32031	3.6798	0.359484	0.474911	0.635424
ENSG00000044574	HSPA5	3309	1	1	8.43713	8.2222	-0.214931	0.103518	0.216742
ENSG00000046604	DSG2	1829	0.6875	0.364706	1.0606	-0.716197	-1.7768	0.000268266	0.00195687
ENSG00000046647	GEMIN8	54960	1	1	5.72719	6.05781	0.330626	0.059969	0.144386
ENSG00000046651	OFD1	8481	1	1	7.86256	8.55472	0.692157	2.8206e-10	1.87127e-08
ENSG00000046653	GPM6B	2824	1	1	8.81325	9.57919	0.765938	1.37719e-07	3.81397e-06
ENSG00000046774	MAGEC2	51438	0.208333	0.2	-1.18425	-1.31268	-0.128429	0.864999	0.922658
ENSG00000046889	PREX2	80243	0.3125	0.470588	-1.0166	-0.156068	0.860533	0.059779	0.144139
ENSG00000047056	WDR37	22884	0.9375	0.976471	3.25083	4.44799	1.19716	3.01825e-05	0.000338836
ENSG00000047188	YTHDC2	64848	0.729167	0.717647	1.36688	1.07008	-0.296808	0.316484	0.483246
ENSG00000047230	CTPS2	56474	0.645833	0.494118	0.951673	0.0860005	-0.865673	0.0818102	0.182763
ENSG00000047249	ATP6V1H	51606	1	1	6.01725	6.45879	0.441536	0.00110204	0.00614882
ENSG00000047315	POLR2B	5431	0.895833	0.882353	3.17512	2.90778	-0.267346	0.451764	0.614525
ENSG00000047346	FAM214A	56204	0.958333	1	4.99407	5.72862	0.734549	0.00295264	0.0137308
ENSG00000047365	ARAP2	116984	0.854167	0.894118	2.50101	3.03273	0.531727	0.0786804	0.177561
ENSG00000047410	TPR	7175	1	1	6.76595	6.98107	0.215117	0.151017	0.285863
ENSG00000047578	KIAA0556	23247	0.708333	0.858824	1.88804	2.54559	0.657547	0.2388	0.396177
ENSG00000047579	DTNBP1	84062	1	1	6.49596	6.66688	0.170919	0.11171	0.22902
ENSG00000047597	XK	7504	0.770833	0.752941	1.48235	1.07313	-0.409223	0.169778	0.310955
ENSG00000047617	ANO2	57101	0.270833	0.270588	-1.07922	-1.21848	-0.13926	0.911788	0.949795
ENSG00000047621	C12orf4	57102	0.916667	0.988235	3.50044	4.90953	1.40909	8.06317e-05	0.000759367
ENSG00000047634	SCML1	6322	1	1	6.03567	6.62629	0.590618	1.14667e-05	0.000149851
ENSG00000047644	WWC3	55841	0.916667	0.905882	3.91978	4.84519	0.925403	0.000628648	0.00389621
ENSG00000047648	ARHGAP6	395	0.979167	0.976471	4.57135	4.89667	0.325318	0.0996032	0.211422
ENSG00000047662	FAM184B	27146	1	1	7.90733	8.05521	0.147884	0.379708	0.546589
ENSG00000047849	MAP4	4134	1	1	6.86663	7.05224	0.185607	0.0793403	0.178651
ENSG00000047932	GOPC	57120	0.979167	0.988235	3.98436	3.95788	-0.0264771	0.977574	0.987681
ENSG00000048028	USP28	57646	0.791667	0.705882	1.49624	1.1913	-0.304943	0.552918	0.70168
ENSG00000048052	HDAC9	9734	1	1	6.59507	6.95811	0.363037	0.013818	0.046924
ENSG00000048140	TSPAN17	26262	0.958333	0.976471	4.59762	4.76737	0.169751	0.912331	0.949795
ENSG00000048162	NOP16	51491	1	1	4.70916	4.48353	-0.225625	0.400373	0.566557
ENSG00000048342	CC2D2A	57545	0.3125	0.129412	-0.842417	-1.85418	-1.01177	0.00645446	0.0255508
ENSG00000048392	RRM2B	50484	0.708333	0.764706	0.920071	1.51764	0.597568	0.117302	0.237399
ENSG00000048405	ZNF800	168850	0.916667	0.905882	3.16977	2.88735	-0.282419	0.389784	0.556365
ENSG00000048471	SNX29	92017	1	1	6.53248	6.66864	0.136162	0.187228	0.332854
ENSG00000048540	LMO3	55885	0.979167	0.988235	5.10174	5.77208	0.670348	3.38014e-05	0.000371264
ENSG00000048544	MRPS10	55173	1	1	6.92272	7.24483	0.322108	0.0281697	0.0820623
ENSG00000048545	GUCA1A	2978	0.875	0.976471	4.06269	5.18965	1.12695	0.00643774	0.0255238
ENSG00000048649	RSF1	51773	1	1	5.79162	5.64081	-0.150813	0.193572	0.3406
ENSG00000048707	VPS13D	55187	0.770833	0.682353	1.92707	1.33284	-0.594234	0.179733	0.323068
ENSG00000048740	CELF2	10659	1	1	5.90358	6.77287	0.869294	1.27104e-08	4.92642e-07
ENSG00000048828	FAM120A	23196	0.979167	0.988235	4.93168	5.8416	0.909919	4.86777e-05	0.000501908
ENSG00000048991	R3HDM1	23518	0.895833	0.858824	2.55028	2.5034	-0.0468728	0.691888	0.806944
ENSG00000049089	COL9A2	1298	0.166667	0.117647	-1.68973	-1.87553	-0.185797	0.437693	0.601982
ENSG00000049130	KITLG	4254	0.5	0.552941	-0.113277	0.179994	0.293271	0.47211	0.632938
ENSG00000049167	ERCC8	1161	0.645833	0.729412	0.774449	1.53458	0.760131	0.186668	0.33221
ENSG00000049239	H6PD	9563	0.833333	0.541176	2.22831	0.0519779	-2.17633	1.34035e-05	0.000171101
ENSG00000049245	VAMP3	9341	1	1	7.12079	7.60313	0.482333	0.000290266	0.00207817
ENSG00000049246	PER3	8863	0.958333	0.976471	4.13653	4.79448	0.657955	0.00234282	0.0113916
ENSG00000049247	UTS2	10911	0.3125	0.364706	-1.18514	-1.25896	-0.0738113	0.923032	0.956696
ENSG00000049283	EPN3	55040	0.291667	0.0705882	-0.776598	-2.11282	-1.33622	0.000312192	0.00221076
ENSG00000049323	LTBP1	4052	0.833333	0.917647	3.22236	3.38671	0.164347	0.691984	0.806944
ENSG00000049449	RCN1	5954	0.958333	0.447059	4.59012	-0.422573	-5.0127	3.50605e-16	6.37329e-13
ENSG00000049540	ELN	2006	0.333333	0.0470588	-0.811853	-2.16768	-1.35583	7.24254e-06	0.000103747
ENSG00000049541	RFC2	5982	1	1	5.52624	5.24843	-0.277812	0.0885696	0.194306
ENSG00000049618	ARID1B	57492	1	0.964706	4.02643	3.47721	-0.549221	0.122659	0.245219
ENSG00000049656	CLPTM1L	81037	1	0.988235	5.47721	5.63059	0.153375	0.0930416	0.201227
ENSG00000049759	NEDD4L	23327	1	1	5.03495	5.87309	0.838143	4.01893e-05	0.000428481
ENSG00000049768	FOXP3	50943	0.1875	0.0941176	-1.6032	-1.97596	-0.372758	0.122957	0.245654
ENSG00000049769	PPP1R3F	89801	0.75	0.776471	2.17659	2.72213	0.545536	0.283433	0.447593
ENSG00000049860	HEXB	3074	1	1	7.62108	8.4157	0.794626	3.24718e-06	5.43028e-05
ENSG00000049883	PTCD2	79810	0.791667	0.811765	2.64275	2.2541	-0.388649	0.222346	0.376753
ENSG00000050030	NEXMIF	340533	0.145833	0.164706	-1.84939	-1.73259	0.116796	0.750939	0.848441
ENSG00000050130	JKAMP	51528	1	1	6.2022	6.34976	0.147562	0.81661	0.891124
ENSG00000050165	DKK3	27122	0.75	0.435294	1.74371	-0.150572	-1.89428	0.000354939	0.00245606
ENSG00000050327	ARHGEF5	7984	0.291667	0.211765	-1.15803	-1.3818	-0.223764	0.393669	0.560131
ENSG00000050344	NFE2L3	9603	0.75	0.847059	1.98625	2.51895	0.532701	0.322431	0.48843
ENSG00000050393	MCUR1	63933	1	1	6.12847	6.10789	-0.0205894	0.457742	0.619617
ENSG00000050405	LIMA1	51474	1	1	5.81953	6.36859	0.549059	0.00123662	0.00673636
ENSG00000050426	LETMD1	25875	1	1	5.95088	6.30406	0.353182	0.0288489	0.0834657
ENSG00000050438	SLC4A8	9498	0.354167	0.447059	-0.687687	-0.554228	0.133459	0.560547	0.707105
ENSG00000050555	LAMC3	10319	0.708333	0.717647	1.75035	1.70234	-0.0480058	0.647338	0.77447
ENSG00000050748	MAPK9	5601	0.708333	0.588235	1.532	0.459678	-1.07232	0.0285652	0.0829565
ENSG00000050767	COL23A1	91522	0.208333	0.258824	-1.45201	-1.26759	0.184424	0.554838	0.702926
ENSG00000050820	BCAR1	9564	1	0.952941	4.42657	4.42688	0.000309635	0.483669	0.643469
ENSG00000051009	FAM160A2	84067	0.875	0.882353	3.33531	3.64575	0.310441	0.4405	0.6043
ENSG00000051108	HERPUD1	9709	1	1	6.98988	7.03624	0.046363	0.882677	0.932974
ENSG00000051128	HOMER3	9454	0.958333	0.952941	4.99906	4.44089	-0.55817	0.00963755	0.0352611
ENSG00000051180	RAD51	5888	1	1	7.56142	7.89671	0.335297	0.0060007	0.0241329
ENSG00000051341	POLQ	10721	0.479167	0.552941	-0.205479	0.301379	0.506858	0.276696	0.439244
ENSG00000051382	PIK3CB	5291	0.729167	0.847059	1.50535	2.57584	1.07049	0.0264454	0.078175
ENSG00000051523	CYBA	1535	0.8125	0.317647	1.74732	-1.29003	-3.03735	1.88519e-11	1.86244e-09
ENSG00000051596	THOC3	84321	1	1	7.50364	8.01238	0.508738	0.00273504	0.0129002
ENSG00000051620	HEBP2	23593	1	1	5.79835	4.88832	-0.910032	2.25083e-06	3.96468e-05
ENSG00000051825	MPHOSPH9	10198	0.583333	0.717647	0.536596	1.21622	0.679624	0.120344	0.241862
ENSG00000052126	PLEKHA5	54477	0.958333	0.988235	4.4088	4.97236	0.563552	0.103516	0.216742
ENSG00000052723	SIKE1	80143	0.979167	0.988235	5.21653	5.40783	0.191298	0.877133	0.929764
ENSG00000052749	RRP12	23223	0.854167	0.858824	2.91355	3.04055	0.126994	0.664294	0.786813
ENSG00000052795	FNIP2	57600	0.729167	0.811765	1.54032	2.36778	0.827462	0.0371672	0.101674
ENSG00000052802	MSMO1	6307	0.979167	0.917647	4.03161	3.81873	-0.212882	0.690434	0.805759
ENSG00000052841	TTC17	55761	1	1	6.06259	6.93355	0.870961	2.83201e-06	4.84293e-05
ENSG00000053108	FSTL4	23105	0.9375	0.964706	3.79047	4.93216	1.14169	0.000214495	0.0016438
ENSG00000053254	FOXN3	1112	0.979167	1	4.82589	5.01567	0.189788	0.853184	0.915158
ENSG00000053371	AKR7A2	8574	1	1	6.39169	5.6788	-0.712894	1.71979e-05	0.000210521
ENSG00000053372	MRTO4	51154	1	0.988235	5.38368	5.24382	-0.139856	0.644461	0.771841
ENSG00000053501	USE1	55850	0.9375	0.870588	3.64852	2.75686	-0.891654	0.00430623	0.01854
ENSG00000053524	MCF2L2	23101	0.833333	0.8	1.84982	1.9449	0.0950835	0.69122	0.806586
ENSG00000053747	LAMA3	3909	0.270833	0.247059	-1.04403	-1.45138	-0.407346	0.491716	0.650256
ENSG00000053770	AP5M1	55745	0.854167	0.870588	2.18079	2.7349	0.554112	0.111795	0.229116
ENSG00000053900	ANAPC4	29945	0.875	0.917647	3.0844	3.62558	0.541184	0.303559	0.469265
ENSG00000053918	KCNQ1	3784	0.979167	1	5.82398	6.40545	0.581471	0.0986453	0.209949
ENSG00000054116	TRAPPC3	27095	0.958333	0.964706	5.28083	5.17282	-0.108014	0.340378	0.507348
ENSG00000054118	THRAP3	9967	1	1	6.84203	6.9363	0.0942737	0.203383	0.353079
ENSG00000054148	PHPT1	29085	1	1	6.22266	5.59924	-0.623421	1.54693e-05	0.000192735
ENSG00000054179	ENTPD2	954	0.229167	0.223529	-1.19092	-1.3268	-0.135881	0.810275	0.886967
ENSG00000054219	LY75	4065	0.5	0.576471	-0.191533	0.120608	0.312141	0.450482	0.61335
ENSG00000054267	ARID4B	51742	1	1	5.54076	5.77624	0.235473	0.0258999	0.0769797
ENSG00000054277	OPN3	23596	0.479167	0.2	-0.441326	-1.71235	-1.27102	0.000271417	0.00197511
ENSG00000054282	SDCCAG8	10806	1	1	6.33618	6.73738	0.401192	0.000400877	0.00270898
ENSG00000054392	HHAT	55733	1	1	5.06871	5.71815	0.649447	0.00152758	0.00802091
ENSG00000054523	KIF1B	23095	0.9375	0.964706	4.15042	4.20337	0.0529583	0.858694	0.918736
ENSG00000054598	FOXC1	2296	0.520833	0.658824	0.0744837	0.625547	0.551064	0.254185	0.413539
ENSG00000054611	TBC1D22A	25771	1	1	5.48896	5.71026	0.221299	0.513398	0.667993
ENSG00000054654	SYNE2	23224	1	1	6.08704	6.0645	-0.0225311	0.559704	0.706405
ENSG00000054690	PLEKHH1	57475	0.541667	0.423529	-0.491774	-0.863075	-0.371301	0.211636	0.363338
ENSG00000054793	ATP9A	10079	0.958333	0.988235	4.16813	4.68335	0.515217	0.109614	0.225791
ENSG00000054796	SPO11	23626	0.104167	0.176471	-1.77465	-1.65373	0.120923	0.352145	0.518812
ENSG00000054803	CBLN4	140689	0.645833	0.811765	0.758808	2.47006	1.71126	0.000463981	0.00303937
ENSG00000054938	CHRDL2	25884	0.916667	0.917647	4.31422	4.61523	0.301013	0.259719	0.4201
ENSG00000054965	FAM168A	23201	0.833333	0.8	2.41774	1.86364	-0.554103	0.240877	0.398676
ENSG00000054967	RELT	84957	0.833333	0.882353	3.00034	3.67353	0.673193	0.116632	0.236359
ENSG00000054983	GALC	2581	0.666667	0.752941	0.948709	1.52138	0.572675	0.133871	0.261723
ENSG00000055044	NOP58	51602	1	1	7.24129	7.14151	-0.0997825	0.248152	0.407233
ENSG00000055070	SZRD1	26099	1	0.988235	5.82605	5.73383	-0.0922194	0.74118	0.841547
ENSG00000055118	KCNH2	3757	0.8125	0.764706	2.91236	2.43506	-0.477303	0.144959	0.277727
ENSG00000055130	CUL1	8454	0.979167	1	6.13412	7.31436	1.18024	3.10269e-06	5.22229e-05
ENSG00000055147	FAM114A2	10827	0.9375	1	4.34474	5.15459	0.809855	0.0477692	0.122091
ENSG00000055163	CYFIP2	26999	0.979167	0.988235	4.45668	5.51011	1.05343	3.9783e-05	0.000425231
ENSG00000055208	TAB2	23118	0.791667	0.894118	1.98087	2.66958	0.688703	0.162771	0.301954
ENSG00000055211	GINM1	116254	1	1	6.21611	6.12178	-0.0943312	0.161973	0.300657
ENSG00000055332	EIF2AK2	5610	0.9375	0.929412	3.39477	3.74692	0.35215	0.084225	0.187055
ENSG00000055483	USP36	57602	1	1	6.29742	6.59575	0.298326	0.00277736	0.0130693
ENSG00000055609	KMT2C	58508	0.979167	1	4.88499	5.52974	0.644748	0.035213	0.0974132
ENSG00000055732	MCOLN3	55283	0.208333	0.164706	-1.54168	-1.62817	-0.0864858	0.612445	0.748287
ENSG00000055917	PUM2	23369	0.875	0.858824	2.73342	2.63567	-0.0977561	0.945773	0.969819
ENSG00000055950	MRPL43	84545	1	1	6.50667	6.07679	-0.42988	0.00938166	0.0345292
ENSG00000056050	HPF1	54969	1	1	6.82148	7.01326	0.191774	0.387379	0.553817
ENSG00000056097	ZFR	51663	1	1	5.98457	6.31019	0.325623	0.0291938	0.0841421
ENSG00000056277	ZNF280C	55609	0.979167	1	5.47806	6.00509	0.527031	0.250076	0.40954
ENSG00000056291	NPFFR2	10886	0.854167	0.823529	2.36324	2.77694	0.413693	0.0491306	0.124734
ENSG00000056487	PHF21B	112885	0.666667	0.694118	0.565419	0.985747	0.420328	0.414256	0.580464
ENSG00000056586	RC3H2	54542	0.833333	0.835294	2.15854	2.2616	0.103065	0.77275	0.863444
ENSG00000056736	IL17RB	55540	0.625	0.635294	0.821561	0.912908	0.0913472	0.86451	0.922309
ENSG00000056972	TRAF3IP2	10758	1	0.988235	5.7675	6.59963	0.832132	0.00028505	0.00205132
ENSG00000056998	GYG2	8908	0.583333	0.623529	1.0425	0.935359	-0.107137	0.788583	0.873534
ENSG00000057019	DCBLD2	131566	0.916667	0.8	2.77145	1.77113	-1.00031	0.00624981	0.0249635
ENSG00000057252	SOAT1	6646	0.916667	0.952941	3.21492	4.363	1.14808	0.000609316	0.00380094
ENSG00000057294	PKP2	5318	0.895833	0.964706	3.44011	3.9208	0.480681	0.436692	0.60106
ENSG00000057468	MSH4	4438	0.104167	0.141176	-2.01209	-1.76022	0.251865	0.477288	0.637857
ENSG00000057608	GDI2	2665	1	1	9.46371	9.97886	0.515153	4.35767e-05	0.000457354
ENSG00000057657	PRDM1	639	0.479167	0.282353	-0.393302	-1.24891	-0.855608	0.0172972	0.0561079
ENSG00000057663	ATG5	9474	0.979167	0.988235	5.25216	5.75756	0.505397	0.0109607	0.0391132
ENSG00000057704	TMCC3	57458	0.645833	0.8	1.0165	2.22762	1.21112	0.00659492	0.0260105
ENSG00000057757	PITHD1	57095	1	1	8.50721	8.73618	0.228968	0.0340098	0.0947625
ENSG00000057935	MTA3	57504	1	1	7.04383	7.24052	0.196682	0.0632264	0.150407
ENSG00000058056	USP13	8975	0.520833	0.423529	-0.135937	-0.682609	-0.546672	0.207104	0.357966
ENSG00000058063	ATP11B	23200	0.645833	0.705882	0.908617	1.02309	0.114474	0.958237	0.977343
ENSG00000058091	CDK14	5218	0.875	0.835294	1.94948	1.57847	-0.371014	0.437346	0.601766
ENSG00000058262	SEC61A1	29927	1	0.988235	5.20711	5.09667	-0.110441	0.374646	0.541791
ENSG00000058272	PPP1R12A	4659	1	1	6.72803	7.02425	0.296219	0.163383	0.302781
ENSG00000058335	RASGRF1	5923	0.791667	0.917647	2.20721	2.75867	0.551465	0.429386	0.594368
ENSG00000058404	CAMK2B	816	0.270833	0.294118	-1.08095	-1.0986	-0.0176467	0.88552	0.935024
ENSG00000058453	CROCC	9696	0.708333	0.635294	1.70148	1.23556	-0.465922	0.367733	0.53523
ENSG00000058600	POLR3E	55718	0.9375	0.905882	3.89036	4.1094	0.219036	0.191847	0.338901
ENSG00000058668	ATP2B4	493	0.958333	0.941176	4.22053	3.75823	-0.462298	0.179485	0.322741
ENSG00000058673	ZC3H11A	9877	0.875	0.882353	3.41901	3.2089	-0.210112	0.748059	0.846372
ENSG00000058729	RIOK2	55781	0.979167	0.988235	5.24391	5.81635	0.572438	0.108065	0.223584
ENSG00000058799	YIPF1	54432	0.979167	1	5.89849	6.35151	0.453017	0.00309072	0.0141805
ENSG00000058804	NDC1	55706	0.833333	0.952941	3.1212	4.19741	1.07621	0.00481666	0.0202304
ENSG00000058866	DGKG	1608	0.520833	0.529412	-0.268687	-0.342376	-0.0736884	0.94666	0.970361
ENSG00000059122	FLYWCH1	84256	1	0.988235	5.90532	5.88934	-0.0159764	0.979443	0.988415
ENSG00000059145	UNKL	64718	1	1	6.33064	7.07499	0.744349	2.17252e-07	5.60968e-06
ENSG00000059377	TBXAS1	6916	0.354167	0.376471	-1.09805	-1.18046	-0.0824083	0.909436	0.94841
ENSG00000059378	PARP12	64761	0.854167	0.952941	3.20954	4.70019	1.49064	7.27975e-05	0.000696481
ENSG00000059573	ALDH18A1	5832	0.916667	0.929412	3.46335	4.21833	0.754981	0.0100257	0.0364629
ENSG00000059588	TARBP1	6894	0.583333	0.552941	0.378321	0.362322	-0.0159986	0.923999	0.956988
ENSG00000059691	GATB	5188	0.854167	0.694118	2.35778	1.35962	-0.998154	0.0702088	0.162788
ENSG00000059728	MXD1	4084	1	1	4.96003	6.09052	1.13049	5.98034e-07	1.30505e-05
ENSG00000059758	CDK17	5128	0.854167	0.870588	2.49656	2.60758	0.111012	0.672901	0.793563
ENSG00000059769	DNAJC25	548645	0.583333	0.670588	0.515719	0.953802	0.438083	0.368211	0.535766
ENSG00000059804	SLC2A3	6515	0.458333	0.2	0.299922	-1.63014	-1.93006	0.000131394	0.00111195
ENSG00000059915	PSD	5662	0.791667	0.752941	1.29705	0.272514	-1.02454	0.0187543	0.0596946
ENSG00000060069	CTDP1	9150	0.708333	0.764706	2.02561	2.56081	0.535201	0.147593	0.28132
ENSG00000060138	YBX3	8531	1	1	8.07896	7.89451	-0.184448	0.218769	0.371766
ENSG00000060140	STYK1	55359	0.1875	0.4	-1.44666	-0.375998	1.07066	0.0111571	0.0396818
ENSG00000060237	WNK1	65125	0.979167	0.952941	4.53688	4.47401	-0.0628734	0.741173	0.841547
ENSG00000060339	CCAR1	55749	1	0.988235	5.23894	5.45917	0.220239	0.280192	0.443592
ENSG00000060491	OGFR	11054	0.979167	0.976471	5.69879	5.91518	0.216385	0.0515802	0.129081
ENSG00000060566	CREB3L3	84699	0.229167	0.341176	-1.1964	-0.506486	0.689917	0.128079	0.25326
ENSG00000060642	PIGV	55650	0.854167	0.858824	3.37716	3.05431	-0.322855	0.76934	0.860937
ENSG00000060656	PTPRU	10076	0.979167	0.964706	5.59687	5.45105	-0.145814	0.750043	0.847754
ENSG00000060688	SNRNP40	9410	1	1	6.38418	6.71115	0.326975	0.0157305	0.0518963
ENSG00000060709	RIMBP2	23504	0.958333	0.988235	4.2485	5.09858	0.850073	0.0113334	0.0402395
ENSG00000060718	COL11A1	1301	0.520833	0.435294	0.0223382	-0.422883	-0.445221	0.353127	0.51981
ENSG00000060749	QSER1	79832	0.604167	0.635294	0.55827	0.537371	-0.0208994	0.984635	0.991727
ENSG00000060762	MPC1	51660	1	0.988235	5.0365	5.12365	0.0871413	0.210121	0.361394
ENSG00000060971	ACAA1	30	1	1	6.51002	6.57485	0.0648357	0.27193	0.433837
ENSG00000060982	BCAT1	586	0.75	0.317647	1.26836	-0.604327	-1.87268	4.84887e-05	0.000500243
ENSG00000061273	HDAC7	51564	0.625	0.152941	1.23082	-1.84231	-3.07313	5.42866e-10	3.27848e-08
ENSG00000061337	LZTS1	11178	0.291667	0.235294	-1.34797	-1.43437	-0.0864006	0.55533	0.703323
ENSG00000061455	PRDM6	93166	0.520833	0.376471	0.307792	-0.553016	-0.860808	0.0836691	0.186161
ENSG00000061656	SPAG4	6676	0.395833	0.282353	-0.746292	-1.19785	-0.451557	0.175908	0.31881
ENSG00000061676	NCKAP1	10787	0.9375	0.976471	4.20154	4.13827	-0.0632754	0.443668	0.606817
ENSG00000061794	MRPS35	60488	1	1	6.30619	6.69621	0.39002	0.000887373	0.00514864
ENSG00000061918	GUCY1B1	2983	0.291667	0.141176	-1.05134	-1.74603	-0.694689	0.0327596	0.0922262
ENSG00000061936	SFSWAP	6433	0.979167	1	5.37315	5.4982	0.125052	0.147058	0.280594
ENSG00000061938	TNK2	10188	0.645833	0.635294	1.23667	0.928104	-0.308562	0.439727	0.603545
ENSG00000061987	MON2	23041	0.833333	0.811765	2.37606	2.36783	-0.00822975	0.52433	0.678044
ENSG00000062038	CDH3	1001	1	1	8.4736	9.23247	0.758865	1.25585e-06	2.44945e-05
ENSG00000062194	GPBP1	65056	1	1	6.31463	7.04672	0.73209	8.65153e-06	0.000119869
ENSG00000062282	DGAT2	84649	1	1	6.47952	6.72578	0.246252	0.049918	0.126117
ENSG00000062485	CS	1431	1	1	6.98123	7.48845	0.507216	0.000255553	0.00187919
ENSG00000062524	LTK	4058	0.9375	0.905882	3.56411	3.05101	-0.513099	0.116982	0.236883
ENSG00000062582	MRPS24	64951	1	1	6.53307	6.18205	-0.351024	0.00626293	0.0249699
ENSG00000062598	ELMO2	63916	0.979167	1	5.30893	6.26702	0.958096	8.22563e-05	0.000769956
ENSG00000062650	WAPL	23063	0.9375	0.988235	3.87866	4.84679	0.968132	0.0075744	0.0290113
ENSG00000062716	VMP1	81671	1	0.976471	5.51108	5.19302	-0.318062	0.498418	0.656017
ENSG00000062725	APPBP2	10513	0.958333	0.941176	3.63269	3.94583	0.313139	0.314896	0.481307
ENSG00000062822	POLD1	5424	0.958333	1	5.65702	6.31855	0.661526	0.134431	0.262284
ENSG00000063046	EIF4B	1975	1	1	7.51943	7.49263	-0.0267923	0.234974	0.391903
ENSG00000063127	SLC6A16	28968	0.4375	0.494118	-0.258912	0.0381837	0.297096	0.601597	0.738907
ENSG00000063169	BICRA	29998	0.5625	0.658824	0.282643	1.18219	0.899547	0.0788624	0.177817
ENSG00000063176	SPHK2	56848	0.895833	0.835294	3.35628	2.67126	-0.685021	0.107041	0.221996
ENSG00000063177	RPL18	6141	1	1	8.18711	7.54524	-0.641877	1.36099e-09	7.10919e-08
ENSG00000063180	CA11	770	0.645833	0.329412	1.3342	-1.11651	-2.45072	4.69991e-06	7.36508e-05
ENSG00000063241	ISOC2	79763	1	0.976471	5.50448	5.5813	0.0768281	0.469169	0.630625
ENSG00000063244	U2AF2	11338	1	1	7.65954	7.95251	0.292971	0.00653543	0.0258039
ENSG00000063245	EPN1	29924	1	1	8.62296	8.71856	0.0956005	0.575578	0.717814
ENSG00000063322	MED29	55588	1	1	6.2057	6.39712	0.19142	0.253956	0.413249
ENSG00000063438	AHRR	.	0.729167	0.8	1.11571	1.89272	0.777011	0.130388	0.256625
ENSG00000063587	ZNF275	10838	0.791667	0.576471	2.48999	0.313685	-2.17631	1.94958e-05	0.000235559
ENSG00000063601	MTMR1	8776	0.708333	0.811765	1.37386	2.20191	0.828047	0.0902672	0.196937
ENSG00000063660	GPC1	2817	0.916667	0.811765	4.48321	2.56703	-1.91618	5.36929e-06	8.16079e-05
ENSG00000063761	ADCK1	57143	0.3125	0.352941	-1.03041	-0.582379	0.448033	0.473333	0.634298
ENSG00000063854	HAGH	3029	1	1	6.51614	7.08317	0.567029	0.000201176	0.00156348
ENSG00000063978	RNF4	6047	1	1	7.15552	7.82223	0.666714	9.4385e-06	0.000128519
ENSG00000064012	CASP8	841	0.583333	0.376471	0.423383	-0.751729	-1.17511	0.0108943	0.038907
ENSG00000064042	LIMCH1	22998	0.791667	0.847059	2.41233	2.26718	-0.145151	0.584231	0.724876
ENSG00000064102	INTS13	55726	0.8125	0.905882	2.43821	3.00901	0.570797	0.191509	0.338577
ENSG00000064115	TM7SF3	51768	1	1	6.10338	6.74351	0.640134	0.019765	0.0623223
ENSG00000064199	SPA17	53340	0.604167	0.776471	0.207012	1.04694	0.839931	0.0274991	0.0805888
ENSG00000064205	CCN5	8839	0.75	0.247059	2.15351	-1.37462	-3.52814	1.69515e-10	1.21603e-08
ENSG00000064218	DMRT3	58524	0.645833	0.741176	1.35084	2.0766	0.72576	0.348672	0.515592
ENSG00000064225	ST3GAL6	10402	0.729167	0.776471	1.55329	2.23828	0.684992	0.0439514	0.114924
ENSG00000064270	ATP2C2	9914	0.958333	0.941176	4.46302	4.90541	0.442387	0.0103113	0.0372467
ENSG00000064300	NGFR	4804	0.25	0.376471	-0.985396	-0.316303	0.669093	0.155861	0.292479
ENSG00000064309	CDON	50937	0.75	0.882353	1.57801	2.48922	0.911204	0.0516155	0.129131
ENSG00000064313	TAF2	6873	0.895833	0.929412	3.16649	3.86467	0.698185	0.103421	0.216742
ENSG00000064393	HIPK2	28996	0.958333	0.894118	3.33115	3.08714	-0.244011	0.647733	0.774614
ENSG00000064419	TNPO3	23534	0.916667	0.976471	3.47918	4.93186	1.45269	0.0001099	0.000964849
ENSG00000064489	BORCS8	.	0.625	0.623529	1.12979	0.826528	-0.303267	0.492663	0.651035
ENSG00000064490	RFXANK	8625	1	0.988235	5.86141	5.4361	-0.425312	0.0645696	0.152732
ENSG00000064545	TMEM161A	54929	0.895833	0.952941	4.59498	4.78679	0.191812	0.657911	0.782166
ENSG00000064547	LPAR2	9170	0.208333	0.258824	-1.5601	-1.35604	0.204062	0.563245	0.709147
ENSG00000064601	CTSA	5476	1	1	7.12094	7.14238	0.0214329	0.908618	0.947828
ENSG00000064607	SUGP2	10147	0.979167	0.988235	4.53989	5.55851	1.01862	1.37591e-05	0.000174886
ENSG00000064651	SLC12A2	6558	1	1	4.87079	5.02994	0.159149	0.78403	0.870516
ENSG00000064652	SNX24	28966	0.791667	0.858824	2.22024	2.97368	0.753442	0.132339	0.259455
ENSG00000064655	EYA2	2139	1	1	7.43945	7.86213	0.422681	0.0488343	0.124105
ENSG00000064666	CNN2	1265	0.979167	0.752941	5.74551	1.91999	-3.82552	3.88813e-13	7.85316e-11
ENSG00000064687	ABCA7	10347	0.354167	0.282353	-0.820294	-1.00374	-0.183441	0.528661	0.681705
ENSG00000064692	SNCAIP	9627	0.833333	0.917647	2.37871	2.95627	0.577562	0.379367	0.546589
ENSG00000064703	DDX20	11218	0.958333	0.988235	4.55868	5.29227	0.73359	0.00309057	0.0141805
ENSG00000064726	BTBD1	53339	0.729167	0.823529	1.82956	2.37585	0.546297	0.318339	0.48506
ENSG00000064763	FAR2	55711	0.25	0.258824	-1.32863	-1.45087	-0.122233	0.997562	0.999506
ENSG00000064787	BCAS1	8537	1	1	6.0152	6.51931	0.504111	0.0200135	0.0629094
ENSG00000064932	SBNO2	22904	0.729167	0.811765	1.73254	2.15995	0.427404	0.490237	0.648961
ENSG00000064933	PMS1	5378	0.979167	1	4.65943	5.15313	0.493703	0.0139996	0.0473371
ENSG00000064961	HMG20B	10362	0.979167	0.917647	4.96154	3.96715	-0.99439	0.000165134	0.00133652
ENSG00000064989	CALCRL	10203	0.458333	0.117647	-0.355853	-1.84291	-1.48706	9.53813e-06	0.000129755
ENSG00000064995	TAF11	6882	0.9375	0.988235	4.29709	4.26434	-0.0327484	0.0350077	0.0970725
ENSG00000064999	ANKS1A	23294	0.8125	0.917647	2.83963	3.55135	0.711721	0.212292	0.363855
ENSG00000065000	AP3D1	8943	0.979167	0.988235	6.03158	6.46291	0.43133	0.178757	0.322174
ENSG00000065029	ZNF76	7629	0.979167	0.905882	4.50391	4.89521	0.391307	0.0408244	0.108784
ENSG00000065054	SLC9A3R2	9351	1	0.964706	6.25776	5.56616	-0.6916	0.00423377	0.0182858
ENSG00000065057	NTHL1	4913	0.979167	0.952941	5.03987	4.45911	-0.580761	0.104506	0.218093
ENSG00000065060	UHRF1BP1	54887	0.791667	0.882353	1.8246	2.70352	0.878918	0.052887	0.13139
ENSG00000065135	GNAI3	2773	1	1	6.32717	7.27406	0.946894	2.21287e-05	0.000261205
ENSG00000065150	IPO5	3843	0.916667	0.988235	3.69114	4.66366	0.972513	0.00574716	0.0233038
ENSG00000065154	OAT	4942	1	1	7.64629	8.33306	0.686771	0.00038688	0.00263298
ENSG00000065183	WDR3	10885	0.708333	0.788235	1.66579	1.69413	0.0283462	0.786175	0.872312
ENSG00000065243	PKN2	5586	1	0.976471	3.96467	4.05839	0.0937249	0.178001	0.321291
ENSG00000065268	WDR18	57418	1	1	6.90048	7.07927	0.178791	0.489543	0.648704
ENSG00000065308	TRAM2	9697	1	1	6.69667	7.26454	0.567869	2.0352e-05	0.000243876
ENSG00000065320	NTN1	9423	0.979167	1	5.75342	6.11607	0.362648	0.0859706	0.190049
ENSG00000065328	MCM10	55388	0.645833	0.764706	0.831819	1.58488	0.753064	0.136345	0.265334
ENSG00000065357	DGKA	1606	0.208333	0.105882	-1.55035	-2.02168	-0.471333	0.0839038	0.186501
ENSG00000065413	ANKRD44	91526	0.541667	0.647059	0.1115	1.15386	1.04236	0.0462602	0.119415
ENSG00000065427	KARS	3735	0.979167	1	6.43176	6.49618	0.0644196	0.975706	0.986396
ENSG00000065457	ADAT1	23536	0.916667	0.905882	3.26326	3.78974	0.526477	0.0605152	0.14547
ENSG00000065485	PDIA5	10954	0.645833	0.447059	0.860279	-0.228206	-1.08848	0.0246759	0.0741788
ENSG00000065491	TBC1D22B	55633	0.916667	0.929412	3.0864	3.97738	0.89098	0.00272939	0.012897
ENSG00000065518	NDUFB4	4710	1	1	5.69898	5.29589	-0.403087	0.000125738	0.00106958
ENSG00000065526	SPEN	23013	0.770833	0.752941	1.97132	1.57582	-0.3955	0.284183	0.448513
ENSG00000065534	MYLK	4638	1	0.964706	5.17382	4.29894	-0.874878	0.00182161	0.00923712
ENSG00000065548	ZC3H15	55854	1	1	7.57865	7.67371	0.0950533	0.97197	0.984371
ENSG00000065559	MAP2K4	6416	0.854167	0.788235	2.32217	1.92604	-0.396132	0.459091	0.62112
ENSG00000065600	PACC1	55248	0.875	0.976471	3.41147	4.83971	1.42824	0.000641632	0.00396041
ENSG00000065609	SNAP91	9892	0.916667	0.964706	3.12474	3.78584	0.661099	0.00364633	0.0162379
ENSG00000065613	SLK	9748	0.916667	0.976471	3.60374	4.32529	0.721543	0.0285005	0.0828341
ENSG00000065615	CYB5R4	51167	0.916667	0.905882	2.91799	3.33675	0.418754	0.152205	0.287741
ENSG00000065618	COL17A1	1308	0.0833333	0.223529	-1.96138	-1.36389	0.597487	0.0416672	0.110525
ENSG00000065621	GSTO2	119391	0.916667	0.917647	3.8036	3.47403	-0.329575	0.180917	0.324714
ENSG00000065665	SEC61A2	55176	0.833333	0.847059	2.84387	3.0455	0.201634	0.332368	0.499198
ENSG00000065675	PRKCQ	5588	1	1	5.22576	5.89118	0.665421	0.0151337	0.0503846
ENSG00000065717	TLE2	7089	1	1	7.4937	7.65483	0.161132	0.758945	0.85335
ENSG00000065802	ASB1	51665	0.854167	0.894118	3.18496	3.48422	0.299259	0.792869	0.875837
ENSG00000065809	FAM107B	83641	0.895833	0.964706	3.02697	3.7844	0.757429	0.216099	0.368607
ENSG00000065833	ME1	4199	0.854167	0.905882	2.74814	3.22434	0.476203	0.108328	0.22408
ENSG00000065882	TBC1D1	23216	1	1	6.28195	6.93175	0.649804	1.22308e-05	0.000158243
ENSG00000065883	CDK13	8621	0.833333	0.694118	2.0435	1.3815	-0.662006	0.308608	0.474568
ENSG00000065911	MTHFD2	10797	0.979167	0.929412	4.29519	4.41032	0.115133	0.251977	0.411373
ENSG00000065923	SLC9A7	84679	0.770833	0.835294	1.964	2.38152	0.417518	0.567917	0.712709
ENSG00000065970	FOXJ2	55810	0.916667	0.858824	2.78831	2.43806	-0.350245	0.845709	0.91056
ENSG00000065978	YBX1	4904	1	1	9.69139	9.70227	0.0108832	0.923487	0.956696
ENSG00000065989	PDE4A	5141	0.729167	0.788235	1.90512	2.47243	0.567311	0.139375	0.26916
ENSG00000066027	PPP2R5A	5525	0.8125	0.894118	2.3561	3.44903	1.09293	0.0075009	0.0287843
ENSG00000066032	CTNNA2	1496	0.979167	1	6.63088	7.55992	0.929041	0.000400877	0.00270898
ENSG00000066044	ELAVL1	1994	1	1	6.78983	7.15293	0.363103	1.99296e-05	0.000239518
ENSG00000066056	TIE1	7075	0.104167	0.0823529	-1.77706	-1.97467	-0.197602	0.640769	0.769443
ENSG00000066084	DIP2B	57609	0.833333	0.788235	1.9028	2.18975	0.286942	0.37034	0.537788
ENSG00000066117	SMARCD1	6602	1	1	5.74772	6.35405	0.606335	5.43438e-05	0.000546082
ENSG00000066135	KDM4A	9682	0.75	0.835294	1.70988	2.57994	0.870062	0.0419661	0.111091
ENSG00000066136	NFYC	4802	1	1	7.94644	8.47182	0.525374	4.92195e-07	1.11283e-05
ENSG00000066185	ZMYND12	84217	0.708333	0.764706	1.55556	2.01532	0.459765	0.251915	0.411373
ENSG00000066230	SLC9A3	6550	0.75	0.741176	1.63854	1.73704	0.0984985	0.703701	0.814925
ENSG00000066248	NGEF	25791	0.708333	0.717647	1.85252	1.72352	-0.129006	0.731079	0.834688
ENSG00000066279	ASPM	259266	0.979167	0.988235	5.24021	5.84222	0.602004	0.000694014	0.00421088
ENSG00000066322	ELOVL1	64834	0.979167	0.964706	5.06218	4.96527	-0.0969104	0.580376	0.721625
ENSG00000066379	ZNRD1	30834	0.958333	0.988235	4.05622	3.60198	-0.454241	0.00106609	0.00599089
ENSG00000066405	CLDN18	51208	1	0.988235	5.05596	6.17744	1.12148	8.585e-07	1.77339e-05
ENSG00000066422	ZBTB11	27107	0.75	0.847059	1.37956	2.3716	0.992046	0.0203547	0.0637726
ENSG00000066427	ATXN3	4287	0.979167	0.964706	4.59233	4.63009	0.0377575	0.318321	0.48506
ENSG00000066455	GOLGA5	9950	0.958333	1	4.72763	5.9931	1.26548	2.79116e-08	9.68277e-07
ENSG00000066468	FGFR2	2263	0.5	0.623529	0.284624	0.925786	0.641162	0.314558	0.480912
ENSG00000066557	LRRC40	55631	0.958333	1	4.82021	5.8696	1.04939	0.000255548	0.00187919
ENSG00000066583	ISOC1	51015	1	1	6.78177	7.15522	0.373449	0.0183297	0.0586202
ENSG00000066629	EML1	2009	0.958333	1	4.43158	5.72452	1.29294	1.34783e-06	2.60656e-05
ENSG00000066651	TRMT11	60487	0.875	0.976471	2.93164	3.67506	0.743419	0.0652212	0.153901
ENSG00000066654	THUMPD1	55623	1	0.976471	6.03918	5.78104	-0.258144	0.227669	0.382493
ENSG00000066697	MSANTD3	91283	0.958333	0.988235	4.65895	4.90132	0.242375	0.784029	0.870516
ENSG00000066735	KIF26A	26153	0.229167	0.117647	-1.42939	-1.86438	-0.434984	0.0952753	0.20496
ENSG00000066739	ATG2B	55102	0.895833	0.894118	3.07068	3.72229	0.651609	0.0285853	0.0829938
ENSG00000066777	ARFGEF1	10565	0.979167	1	4.97716	5.53073	0.553573	0.0562452	0.137775
ENSG00000066827	ZFAT	57623	0.729167	0.705882	1.22724	1.51035	0.283116	0.420303	0.58658
ENSG00000066855	MTFR1	9650	0.895833	0.941176	3.41024	3.90422	0.493978	0.0796788	0.179235
ENSG00000066923	STAG3	10734	1	1	8.69705	8.86335	0.166296	0.0306089	0.0874032
ENSG00000066926	FECH	2235	0.958333	0.976471	4.99297	5.63968	0.646711	0.01346	0.0460217
ENSG00000066933	MYO9A	4649	0.895833	0.952941	3.52592	4.20702	0.6811	0.084225	0.187055
ENSG00000067057	PFKP	5214	1	1	9.24703	9.89183	0.644796	1.9644e-07	5.14537e-06
ENSG00000067064	IDI1	3422	1	1	5.90757	6.63976	0.732183	0.000255553	0.00187919
ENSG00000067066	SP100	6672	0.895833	0.447059	3.13914	-0.327382	-3.46652	6.07382e-11	5.15934e-09
ENSG00000067082	KLF6	1316	1	0.976471	5.59832	4.73661	-0.861713	0.000653617	0.00400865
ENSG00000067113	PLPP1	8611	0.916667	0.917647	3.73839	3.56125	-0.177133	0.585098	0.725517
ENSG00000067141	NEO1	4756	0.75	0.929412	2.32762	3.24255	0.914933	0.212984	0.364731
ENSG00000067167	TRAM1	23471	1	1	6.01143	6.62241	0.610986	2.25083e-06	3.96468e-05
ENSG00000067177	PHKA1	5255	0.645833	0.564706	0.468549	0.189405	-0.279144	0.478878	0.639231
ENSG00000067182	TNFRSF1A	7132	0.833333	0.352941	2.97651	-0.679977	-3.65649	1.17883e-09	6.28409e-08
ENSG00000067191	CACNB1	782	0.25	0.141176	-1.17469	-1.86133	-0.686645	0.0788612	0.177817
ENSG00000067208	EVI5	7813	0.895833	0.917647	2.36886	2.87049	0.501625	0.189428	0.336041
ENSG00000067221	STOML1	9399	0.520833	0.576471	0.671651	0.873351	0.2017	0.629074	0.761085
ENSG00000067225	PKM	5315	1	1	8.39205	8.50018	0.108132	0.709553	0.819116
ENSG00000067248	DHX29	54505	1	1	5.72166	5.58128	-0.140376	0.342768	0.509514
ENSG00000067334	DNTTIP2	30836	1	1	7.20355	7.49054	0.286991	0.0360352	0.0992796
ENSG00000067365	METTL22	79091	0.958333	0.988235	5.53383	5.77114	0.23731	0.688738	0.804053
ENSG00000067369	TP53BP1	7158	0.833333	0.682353	2.09433	1.17279	-0.921539	0.0478424	0.122213
ENSG00000067445	TRO	7216	0.6875	0.294118	1.59247	-1.01745	-2.60993	1.06464e-06	2.13374e-05
ENSG00000067533	RRP15	51018	0.979167	0.976471	4.02195	4.17576	0.153801	0.155055	0.291241
ENSG00000067560	RHOA	387	1	1	9.39376	9.60829	0.214526	0.0372991	0.101866
ENSG00000067596	DHX8	1659	0.916667	0.941176	2.63517	3.94108	1.3059	3.33656e-05	0.000368162
ENSG00000067601	PMS2P4	.	0.25	0.270588	-1.50407	-1.55568	-0.0516064	0.973462	0.985552
ENSG00000067606	PRKCZ	5590	0.979167	0.976471	5.04023	5.4118	0.371562	0.681851	0.799505
ENSG00000067704	IARS2	55699	0.916667	0.894118	3.47027	3.27175	-0.198513	0.949546	0.971766
ENSG00000067715	SYT1	6857	0.708333	0.505882	0.964272	0.0106081	-0.953664	0.0466471	0.120243
ENSG00000067798	NAV3	89795	0.729167	0.658824	0.556926	0.17101	-0.385916	0.322084	0.488025
ENSG00000067829	IDH3G	3421	1	1	8.01059	8.07804	0.0674521	0.591661	0.730901
ENSG00000067836	ROGDI	79641	1	1	6.13443	6.1568	0.0223676	0.871596	0.926325
ENSG00000067900	ROCK1	6093	0.979167	1	5.25735	5.69086	0.43351	0.0550475	0.135406
ENSG00000067955	CBFB	865	0.9375	0.929412	2.95083	3.31491	0.364086	0.119234	0.24046
ENSG00000067992	PDK3	5165	0.895833	0.929412	4.16658	4.28097	0.114391	0.794795	0.87696
ENSG00000068001	HYAL2	8692	0.895833	0.964706	4.87235	5.13337	0.261022	0.988785	0.994256
ENSG00000068024	HDAC4	9759	0.916667	0.941176	3.28333	3.98503	0.701696	0.0544197	0.134317
ENSG00000068028	RASSF1	11186	0.9375	0.929412	4.78702	4.41711	-0.369909	0.0515457	0.129081
ENSG00000068078	FGFR3	2261	0.208333	0.247059	-1.31576	-1.15272	0.16304	0.655747	0.780934
ENSG00000068079	IFI35	3430	0.729167	0.423529	2.09351	-0.387461	-2.48097	5.20236e-06	7.96536e-05
ENSG00000068097	HEATR6	63897	0.479167	0.388235	-0.374005	-0.696531	-0.322526	0.359744	0.527118
ENSG00000068120	COASY	80347	1	0.988235	7.35229	7.48957	0.13728	0.210121	0.361394
ENSG00000068137	PLEKHH3	79990	0.854167	0.882353	2.76929	2.86316	0.0938707	0.776612	0.865545
ENSG00000068305	MEF2A	4205	0.875	0.941176	2.59339	2.77295	0.179566	0.678334	0.797433
ENSG00000068308	OTUD5	55593	0.979167	0.988235	5.30649	6.00959	0.703104	3.31168e-05	0.000365734
ENSG00000068323	TFE3	7030	0.895833	0.894118	3.54454	3.62247	0.0779293	0.406695	0.57256
ENSG00000068354	TBC1D25	4943	0.9375	0.964706	4.79314	5.31269	0.519554	0.0091883	0.0339896
ENSG00000068366	ACSL4	2182	0.666667	0.564706	0.975748	0.536614	-0.439134	0.533931	0.68631
ENSG00000068383	INPP5A	3632	0.916667	0.964706	2.93135	3.58131	0.649957	0.0731114	0.167895
ENSG00000068394	GPKOW	27238	1	1	6.84984	7.11837	0.268527	0.068031	0.15869
ENSG00000068400	GRIPAP1	56850	0.979167	0.941176	4.55087	4.72927	0.178403	0.0907691	0.197722
ENSG00000068438	FTSJ1	24140	1	0.988235	6.38671	6.38297	-0.00373285	0.547161	0.696275
ENSG00000068489	PRR11	55771	0.520833	0.447059	-0.127352	-0.651991	-0.524639	0.294049	0.458896
ENSG00000068615	REEP1	65055	0.520833	0.482353	-0.026056	0.0236643	0.0497203	0.942013	0.967881
ENSG00000068650	ATP11A	23250	0.645833	0.741176	1.21696	1.48187	0.264908	0.633442	0.764513
ENSG00000068654	POLR1A	25885	0.854167	0.882353	2.97457	3.81426	0.839689	0.0300779	0.0862254
ENSG00000068697	LAPTM4A	9741	1	1	8.9329	8.94133	0.00842769	0.81661	0.891124
ENSG00000068724	TTC7A	57217	0.875	0.952941	3.43574	4.05575	0.620011	0.105447	0.219541
ENSG00000068745	IP6K2	51447	1	1	6.65304	6.80485	0.151814	0.495451	0.653259
ENSG00000068781	STON1	286749	0.583333	0.423529	-0.459386	-1.05843	-0.599045	0.0585537	0.142165
ENSG00000068784	SRBD1	55133	0.770833	0.952941	2.07808	3.54617	1.46808	0.00531633	0.0218841
ENSG00000068796	KIF2A	3796	0.979167	1	4.44895	4.80489	0.355943	0.0207755	0.0646894
ENSG00000068831	RASGRP2	10235	0.645833	0.694118	0.591346	0.809244	0.217898	0.575462	0.717814
ENSG00000068878	PSME4	23198	0.791667	0.635294	1.15323	0.469231	-0.684003	0.165711	0.305911
ENSG00000068885	IFT80	57560	0.833333	0.835294	1.79803	1.75697	-0.0410555	0.808917	0.886223
ENSG00000068903	SIRT2	22933	0.916667	0.929412	4.8751	4.44635	-0.428758	0.0335793	0.0940386
ENSG00000068912	ERLEC1	27248	0.979167	0.976471	5.34793	5.55668	0.208752	0.443677	0.606817
ENSG00000068971	PPP2R5B	5526	0.541667	0.494118	0.378127	0.306409	-0.071718	0.820569	0.893699
ENSG00000068976	PYGM	5837	0.208333	0.329412	-1.44388	-0.749713	0.694166	0.0957147	0.20562
ENSG00000069011	PITX1	5307	0.979167	1	6.21254	6.6234	0.410862	0.31268	0.478644
ENSG00000069018	TRPC7	57113	0.9375	0.988235	3.99706	4.65356	0.656501	0.0628908	0.149892
ENSG00000069020	MAST4	375449	0.958333	0.988235	4.51383	4.35361	-0.160214	0.400371	0.566557
ENSG00000069188	SDK2	54549	1	1	5.84574	6.54386	0.698118	0.000430303	0.00285893
ENSG00000069248	NUP133	55746	1	1	5.13264	5.89445	0.761813	6.246e-05	0.000613397
ENSG00000069275	NUCKS1	64710	1	1	6.29594	5.75112	-0.544821	8.55273e-05	0.000793222
ENSG00000069329	VPS35	55737	0.979167	1	6.7884	7.65494	0.86654	8.28196e-06	0.000115733
ENSG00000069345	DNAJA2	10294	1	1	8.88463	9.41541	0.530779	5.76916e-05	0.000572757
ENSG00000069399	BCL3	602	0.4375	0.505882	0.586593	-0.138715	-0.725307	0.559645	0.706405
ENSG00000069424	KCNAB2	8514	0.729167	0.811765	1.25172	1.59731	0.345585	0.441305	0.604798
ENSG00000069431	ABCC9	10060	0.3125	0.0705882	-1.09521	-2.06984	-0.974634	0.000223624	0.00169634
ENSG00000069482	GAL	51083	0.666667	0.505882	0.0472759	-0.519643	-0.566919	0.104855	0.218584
ENSG00000069493	CLEC2D	29121	0.729167	0.435294	0.488911	-1.28147	-1.77038	1.94863e-06	3.54933e-05
ENSG00000069509	FUNDC1	139341	1	1	5.17786	5.3182	0.140342	0.528609	0.681705
ENSG00000069535	MAOB	4129	0.9375	0.517647	4.39262	0.243067	-4.14955	2.2217e-12	3.01388e-10
ENSG00000069667	RORA	6095	1	0.988235	5.44477	5.3225	-0.122269	0.416307	0.582305
ENSG00000069702	TGFBR3	7049	0.9375	0.811765	4.20074	2.49055	-1.71019	9.57012e-05	0.000869393
ENSG00000069812	HES2	54626	0.104167	0.105882	-1.94571	-1.88235	0.0633631	0.947405	0.971015
ENSG00000069849	ATP1B3	483	1	1	7.11743	7.29847	0.181041	0.483674	0.643469
ENSG00000069869	NEDD4	4734	0.479167	0.423529	-0.688999	-0.909727	-0.220728	0.493432	0.651762
ENSG00000069943	PIGB	9488	0.666667	0.447059	0.979835	-0.0679605	-1.0478	0.0316909	0.0898437
ENSG00000069956	MAPK6	5597	1	1	5.33272	6.19169	0.858972	2.10009e-06	3.75372e-05
ENSG00000069966	GNB5	10681	1	1	6.12095	6.38211	0.261167	0.0249766	0.0748844
ENSG00000069974	RAB27A	5873	0.895833	0.964706	3.10881	4.07604	0.967236	0.00554044	0.0226426
ENSG00000069998	HDHD5	27440	1	0.952941	5.17964	4.52039	-0.659247	0.124943	0.248746
ENSG00000070010	UFD1	7353	0.958333	1	5.26271	5.14092	-0.121791	0.0126043	0.0436426
ENSG00000070018	LRP6	4040	0.979167	1	5.86121	6.62559	0.76438	0.021035	0.0652852
ENSG00000070047	PHRF1	57661	0.875	0.976471	3.63143	4.1873	0.555864	0.352335	0.518889
ENSG00000070061	ELP1	8518	0.833333	0.894118	3.05671	3.28575	0.229042	0.908523	0.947828
ENSG00000070081	NUCB2	4925	1	0.988235	5.86312	5.57199	-0.291129	0.0666286	0.156444
ENSG00000070087	PFN2	5217	1	1	8.72473	9.13158	0.406853	0.000228936	0.0017268
ENSG00000070159	PTPN3	5774	1	1	4.29371	5.07016	0.776453	0.00210015	0.0103656
ENSG00000070182	SPTB	6710	0.8125	0.847059	3.00862	3.22268	0.21406	0.925179	0.958012
ENSG00000070190	DAPP1	27071	0.5	0.729412	0.530632	1.55983	1.0292	0.0508568	0.127883
ENSG00000070214	SLC44A1	23446	0.729167	0.647059	1.0101	0.373936	-0.636162	0.19566	0.343676
ENSG00000070269	TMEM260	54916	0.8125	0.788235	1.65447	1.60344	-0.0510267	0.923166	0.956696
ENSG00000070366	SMG6	23293	0.958333	0.847059	3.79429	3.22427	-0.570022	0.957002	0.976314
ENSG00000070367	EXOC5	10640	0.770833	0.905882	1.57924	2.77157	1.19232	0.00754038	0.0288992
ENSG00000070371	CLTCL1	8218	0.458333	0.482353	-0.375374	-0.157607	0.217768	0.614005	0.749489
ENSG00000070388	FGF22	27006	0.125	0.152941	-1.83174	-1.64833	0.183411	0.65242	0.778603
ENSG00000070404	FSTL3	10272	0.854167	0.705882	3.02935	1.84675	-1.1826	0.0218531	0.0672955
ENSG00000070413	DGCR2	9993	0.979167	0.941176	4.45321	4.36151	-0.0917049	0.580364	0.721625
ENSG00000070423	RNF126	55658	1	1	6.55492	6.74343	0.188519	0.0817762	0.18271
ENSG00000070444	MNT	4335	0.895833	0.941176	2.87345	3.68218	0.808735	0.0125029	0.0433737
ENSG00000070476	ZXDC	79364	0.854167	0.964706	3.06164	4.27714	1.2155	0.00419481	0.0181859
ENSG00000070495	JMJD6	23210	0.979167	0.941176	5.33162	5.38088	0.049267	0.272932	0.435169
ENSG00000070501	POLB	5423	1	1	6.04608	6.36138	0.315293	0.00286379	0.0133997
ENSG00000070540	WIPI1	55062	0.895833	0.917647	3.44049	3.62594	0.185451	0.577038	0.719296
ENSG00000070601	FRMPD1	22844	0.3125	0.447059	-0.884311	-0.184578	0.699733	0.129818	0.25578
ENSG00000070610	GBA2	57704	0.854167	0.870588	3.12637	2.9702	-0.156173	0.40374	0.569459
ENSG00000070614	NDST1	3340	0.9375	0.752941	3.27169	1.74855	-1.52314	0.000807431	0.0047598
ENSG00000070669	ASNS	440	1	1	6.18735	6.37632	0.188971	0.998131	0.999506
ENSG00000070718	AP3M2	10947	0.854167	0.976471	3.05966	4.61183	1.55217	8.07708e-06	0.000113378
ENSG00000070729	CNGB1	1258	0.0625	0.152941	-2.12169	-1.72038	0.401305	0.120013	0.241487
ENSG00000070731	ST6GALNAC2	10610	0.25	0.141176	-1.15313	-1.8671	-0.713966	0.0625829	0.149217
ENSG00000070756	PABPC1	26986	1	1	9.04588	8.84879	-0.197089	0.0132858	0.0455593
ENSG00000070759	TESK2	10420	0.645833	0.764706	0.77426	2.24861	1.47435	0.00419597	0.0181865
ENSG00000070761	CFAP20	29105	1	1	6.267	6.38389	0.11689	0.0754118	0.171935
ENSG00000070770	CSNK2A2	1459	0.9375	0.976471	4.44854	4.75621	0.307674	0.534747	0.686789
ENSG00000070778	PTPN21	11099	0.875	0.858824	2.97848	2.76981	-0.208678	0.827334	0.897881
ENSG00000070785	EIF2B3	8891	1	1	6.38558	6.44485	0.0592654	0.744722	0.843935
ENSG00000070808	CAMK2A	815	0.854167	0.976471	2.97079	4.59869	1.62791	2.04467e-06	3.69096e-05
ENSG00000070814	TCOF1	6949	1	1	7.87346	8.12431	0.250847	0.540941	0.691945
ENSG00000070831	CDC42	998	1	1	9.37195	9.65345	0.281497	0.000183319	0.00144697
ENSG00000070882	OSBPL3	26031	0.8125	0.964706	2.51054	3.91488	1.40434	0.00158403	0.00825767
ENSG00000070886	EPHA8	2046	0.916667	1	4.28511	5.38534	1.10023	0.0157292	0.0518963
ENSG00000070915	SLC12A3	6559	0.208333	0.211765	-1.65173	-1.37099	0.280736	0.810384	0.886967
ENSG00000070950	RAD18	56852	0.979167	1	5.09034	5.8103	0.719959	0.000130618	0.00110591
ENSG00000070961	ATP2B1	490	1	0.988235	6.46012	6.67354	0.213422	0.0746455	0.170623
ENSG00000070985	TRPM5	29850	0.979167	1	5.11077	5.60703	0.496255	0.0167713	0.0546264
ENSG00000071051	NCK2	8440	1	1	7.56143	8.53962	0.978189	1.09248e-10	8.30928e-09
ENSG00000071054	MAP4K4	9448	0.958333	0.988235	4.44078	4.42105	-0.0197307	0.20338	0.353079
ENSG00000071073	MGAT4A	11320	0.958333	0.976471	4.5059	5.23473	0.728836	0.000193809	0.00151623
ENSG00000071082	RPL31	6160	1	1	8.26941	7.58136	-0.688056	6.27742e-07	1.36008e-05
ENSG00000071127	WDR1	9948	1	1	7.86242	8.38131	0.518887	1.39071e-05	0.000176292
ENSG00000071189	SNX13	23161	0.708333	0.847059	1.68087	2.10551	0.424643	0.542355	0.693077
ENSG00000071205	ARHGAP10	79658	1	1	6.2889	6.93797	0.649069	4.07183e-06	6.53289e-05
ENSG00000071242	RPS6KA2	6196	0.916667	0.905882	3.60127	3.53002	-0.0712551	0.654457	0.779997
ENSG00000071243	ING3	54556	1	1	6.16391	6.3578	0.193895	0.0386005	0.104494
ENSG00000071246	VASH1	22846	0.458333	0.317647	0.103823	-0.813717	-0.917541	0.0590656	0.143007
ENSG00000071282	LMCD1	29995	0.833333	0.8	2.9409	2.13134	-0.809555	0.018406	0.0588123
ENSG00000071462	BUD23	114049	1	1	7.81859	8.08954	0.27095	0.000762221	0.00454433
ENSG00000071537	SEL1L	6400	0.958333	0.964706	4.43766	4.60075	0.163091	0.432597	0.597021
ENSG00000071539	TRIP13	9319	0.916667	1	4.41552	5.83565	1.42013	0.000125713	0.00106958
ENSG00000071553	ATP6AP1	537	1	1	7.43073	7.2312	-0.199527	0.1238	0.246867
ENSG00000071564	TCF3	6929	0.979167	1	5.66358	6.31575	0.652173	0.466298	0.628159
ENSG00000071575	TRIB2	28951	0.833333	0.694118	2.71764	1.46399	-1.25365	0.0058371	0.0235898
ENSG00000071626	DAZAP1	26528	1	1	5.86789	6.43755	0.569664	0.000138274	0.00115885
ENSG00000071655	MBD3	53615	0.958333	0.905882	5.55324	4.3795	-1.17375	0.0153088	0.0508467
ENSG00000071794	HLTF	6596	0.979167	0.988235	4.54242	4.4865	-0.0559116	0.676705	0.796603
ENSG00000071859	FAM50A	9130	0.979167	0.976471	6.12365	5.93838	-0.185269	0.208419	0.359492
ENSG00000071889	FAM3A	60343	0.979167	0.847059	4.35054	2.75054	-1.6	5.94536e-06	8.82716e-05
ENSG00000071894	CPSF1	29894	1	1	6.18274	6.8623	0.679559	0.000531127	0.0033972
ENSG00000071909	MYO3B	140469	0.958333	1	4.34537	4.8349	0.48953	0.342768	0.509514
ENSG00000071967	CYBRD1	79901	0.708333	0.388235	1.67641	-0.603003	-2.27941	8.67285e-06	0.000120072
ENSG00000071991	CDH19	28513	0.229167	0.211765	-1.36416	-1.41833	-0.054174	0.780351	0.868271
ENSG00000071994	PDCD2	5134	1	1	5.7041	5.47777	-0.226337	0.611228	0.747002
ENSG00000072042	RDH11	51109	0.854167	0.835294	3.14776	2.65697	-0.490793	0.183252	0.327805
ENSG00000072062	PRKACA	5566	0.958333	0.929412	4.42222	3.74083	-0.681382	0.0019697	0.00985029
ENSG00000072071	ADGRL1	22859	0.895833	0.917647	3.67564	3.99554	0.3199	0.450514	0.61335
ENSG00000072110	ACTN1	87	1	1	7.43749	8.32021	0.882716	3.17415e-06	5.31794e-05
ENSG00000072121	ZFYVE26	23503	0.604167	0.611765	0.730161	1.12731	0.397147	0.363704	0.53108
ENSG00000072133	RPS6KA6	27330	0.3125	0.152941	-1.11571	-1.75822	-0.642509	0.0308212	0.0878853
ENSG00000072134	EPN2	22905	0.9375	1	4.08608	5.28212	1.19604	1.05175e-05	0.000139451
ENSG00000072135	PTPN18	26469	0.729167	0.694118	1.54374	1.07771	-0.466032	0.36101	0.528503
ENSG00000072163	LIMS2	55679	0.979167	0.917647	5.4708	4.34632	-1.12448	0.00153815	0.00807404
ENSG00000072195	SPEG	10290	0.291667	0.0823529	-0.855492	-1.98683	-1.13134	0.00103423	0.00584764
ENSG00000072201	LNX1	84708	0.833333	0.988235	3.10764	4.94326	1.83562	3.69512e-05	0.000400443
ENSG00000072210	ALDH3A2	224	0.979167	0.988235	4.62281	4.71984	0.0970216	0.877133	0.929764
ENSG00000072274	TFRC	7037	0.875	0.858824	3.18829	2.68936	-0.498937	0.14141	0.272246
ENSG00000072310	SREBF1	6720	0.708333	0.529412	1.98019	-0.0442197	-2.02441	0.000475012	0.00310268
ENSG00000072364	AFF4	27125	0.958333	0.976471	4.2702	4.402	0.131805	0.685289	0.801885
ENSG00000072401	UBE2D1	7321	1	1	4.96387	5.3917	0.427833	0.0108875	0.0388904
ENSG00000072415	MPP5	64398	0.979167	1	5.06567	5.94939	0.883723	1.36133e-05	0.000173536
ENSG00000072422	RHOBTB1	9886	0.3125	0.0588235	-0.908094	-2.0982	-1.19011	7.29068e-05	0.000697159
ENSG00000072501	SMC1A	8243	1	0.976471	5.21097	5.69889	0.487916	0.002735	0.0129002
ENSG00000072506	HSD17B10	3028	1	0.976471	5.29152	4.6022	-0.689327	0.00197187	0.00985029
ENSG00000072518	MARK2	2011	0.979167	0.976471	4.07892	4.18943	0.110506	0.553413	0.70168
ENSG00000072571	HMMR	3161	0.833333	0.952941	2.65575	3.77295	1.1172	0.00272525	0.0128842
ENSG00000072609	CHFR	55743	0.833333	0.905882	3.2012	4.14035	0.939144	0.0128629	0.0443685
ENSG00000072657	TRHDE	29953	0.833333	0.964706	2.32565	3.10514	0.779495	0.128334	0.253627
ENSG00000072682	P4HA2	8974	0.916667	0.941176	4.2739	4.88326	0.609357	0.210051	0.361394
ENSG00000072736	NFATC3	4775	0.791667	0.941176	2.60543	3.9681	1.36267	0.000755598	0.00452065
ENSG00000072756	TRNT1	51095	1	0.988235	4.80588	5.59187	0.785983	0.000521951	0.00334674
ENSG00000072778	ACADVL	37	1	1	7.70205	7.36281	-0.339242	0.00104862	0.0059143
ENSG00000072786	STK10	6793	0.479167	0.564706	-0.183213	0.369593	0.552805	0.239523	0.397268
ENSG00000072803	FBXW11	23291	0.958333	0.929412	2.26178	2.75333	0.491551	0.157752	0.294833
ENSG00000072832	CRMP1	1400	0.9375	1	5.37676	6.75525	1.37849	0.0996032	0.211422
ENSG00000072840	EVC	2121	0.583333	0.552941	0.475826	0.222058	-0.253769	0.609188	0.74551
ENSG00000072849	DERL2	51009	0.916667	0.964706	3.80389	4.0003	0.196406	0.949566	0.971766
ENSG00000072864	NDE1	54820	1	1	5.62792	5.88175	0.253822	0.24056	0.398296
ENSG00000072952	MRVI1	10335	0.770833	0.823529	2.22807	2.89945	0.671387	0.151492	0.286635
ENSG00000072954	TMEM38A	79041	0.375	0.188235	-0.882126	-1.44913	-0.567004	0.0331737	0.0931587
ENSG00000072958	AP1M1	8907	1	1	8.22674	8.31209	0.0853489	0.975706	0.986396
ENSG00000073008	PVR	5817	0.791667	0.741176	2.21595	2.04685	-0.169101	0.952973	0.97453
ENSG00000073050	XRCC1	7515	1	1	7.24241	7.49647	0.254061	0.046211	0.119322
ENSG00000073060	SCARB1	949	1	1	7.82297	7.80523	-0.017736	0.534757	0.686789
ENSG00000073111	MCM2	4171	0.979167	0.988235	5.32528	6.16841	0.843138	0.00439294	0.0188293
ENSG00000073146	MOV10L1	54456	0.8125	0.823529	2.07511	2.21408	0.138979	0.510647	0.665702
ENSG00000073150	PANX2	56666	0.208333	0.235294	-1.35094	-1.11856	0.232383	0.698523	0.811462
ENSG00000073169	SELENOO	83642	0.895833	0.882353	3.78385	3.97609	0.192237	0.489233	0.648704
ENSG00000073282	TP63	8626	0.875	0.952941	3.06643	4.30144	1.235	1.90326e-05	0.000231112
ENSG00000073331	ALPK1	80216	0.208333	0.0823529	-1.34439	-2.07474	-0.730357	0.0277601	0.0812467
ENSG00000073350	LLGL2	3993	0.979167	0.988235	5.5127	6.25149	0.73879	0.000314859	0.00222791
ENSG00000073417	PDE8A	5151	0.895833	0.847059	3.05355	2.82277	-0.230772	0.803661	0.882983
ENSG00000073464	CLCN4	1183	1	1	4.95601	5.91695	0.96094	3.84495e-08	1.29193e-06
ENSG00000073536	NLE1	54475	0.791667	0.788235	3.10438	2.77799	-0.32639	0.220136	0.373706
ENSG00000073578	SDHA	6389	1	1	7.96893	8.51015	0.541211	0.000179931	0.00142642
ENSG00000073584	SMARCE1	6605	1	1	7.43058	7.57323	0.142651	0.477844	0.638178
ENSG00000073605	GSDMB	55876	0.291667	0.0470588	-0.957893	-2.12201	-1.16411	8.29796e-05	0.000775529
ENSG00000073614	KDM5A	5927	0.875	0.894118	2.60404	2.84279	0.238755	0.59789	0.736045
ENSG00000073670	ADAM11	4185	0.395833	0.458824	-0.575881	-0.242352	0.333528	0.418321	0.584556
ENSG00000073711	PPP2R3A	5523	0.729167	0.776471	1.65949	1.70991	0.0504185	0.667682	0.789612
ENSG00000073712	FERMT2	10979	1	0.988235	4.86228	5.19248	0.330201	0.0527159	0.131036
ENSG00000073734	ABCB11	8647	0.375	0.447059	-0.966808	-0.510828	0.455981	0.293013	0.4577
ENSG00000073756	PTGS2	5743	0.145833	0.0117647	-1.40346	-2.24613	-0.842665	0.00187497	0.00945182
ENSG00000073792	IGF2BP2	10644	1	0.894118	3.95468	3.10975	-0.844924	0.0360067	0.0992615
ENSG00000073803	MAP3K13	9175	1	0.976471	4.42751	3.70155	-0.72596	0.0037595	0.0166604
ENSG00000073849	ST6GAL1	6480	0.333333	0.423529	-0.794609	-0.354554	0.440054	0.312953	0.478975
ENSG00000073910	FRY	10129	0.75	0.705882	1.68066	0.907101	-0.773558	0.0630323	0.150092
ENSG00000073921	PICALM	8301	0.979167	0.964706	4.06679	4.55527	0.488479	0.0046582	0.0196968
ENSG00000073969	NSF	4905	1	0.988235	5.13542	6.01135	0.875933	2.3557e-05	0.000275737
ENSG00000074047	GLI2	2736	0.5	0.223529	0.0764127	-1.33214	-1.40855	0.000868214	0.00504875
ENSG00000074054	CLASP1	23332	0.895833	0.964706	3.60676	4.33642	0.729658	0.0925515	0.200572
ENSG00000074071	MRPS34	65993	1	0.988235	6.55918	6.48326	-0.075914	0.78403	0.870516
ENSG00000074181	NOTCH3	4854	0.520833	0.188235	0.42469	-1.67578	-2.10047	8.80023e-06	0.000121558
ENSG00000074201	CLNS1A	1207	1	1	6.99438	6.77082	-0.223557	0.0340098	0.0947625
ENSG00000074211	PPP2R2C	5522	0.9375	0.976471	4.35491	4.78319	0.428284	0.369614	0.53691
ENSG00000074219	TEAD2	8463	0.5	0.282353	0.304862	-1.29084	-1.5957	0.00094848	0.00545337
ENSG00000074266	EED	8726	0.854167	0.847059	2.92207	3.13495	0.21288	0.873227	0.927474
ENSG00000074276	CDHR2	54825	0.270833	0.411765	-1.14657	-0.16311	0.983456	0.0568128	0.138999
ENSG00000074317	SNCB	6620	0.916667	0.988235	4.55201	5.16341	0.611395	0.397742	0.56389
ENSG00000074319	TSG101	7251	1	1	9.5884	9.96689	0.378484	5.43438e-05	0.000546082
ENSG00000074356	NCBP3	55421	1	1	5.30944	5.83455	0.52511	0.00191051	0.00959107
ENSG00000074370	ATP2A3	489	0.375	0.247059	-0.391673	-0.93669	-0.545017	0.181308	0.325191
ENSG00000074410	CA12	771	0.583333	0.752941	0.370647	1.7135	1.34285	0.0126292	0.04372
ENSG00000074416	MGLL	11343	0.25	0.0941176	-1.33911	-2.02315	-0.684039	0.0136117	0.0464448
ENSG00000074527	NTN4	59277	0.770833	0.788235	1.76698	1.4768	-0.290175	0.245693	0.404474
ENSG00000074582	BCS1L	617	0.979167	0.894118	4.43983	3.911	-0.52883	0.570713	0.714705
ENSG00000074590	NUAK1	9891	0.375	0.341176	-0.845804	-0.932332	-0.0865278	0.80718	0.885244
ENSG00000074603	DPP8	54878	0.9375	0.917647	3.3272	3.34712	0.0199258	0.742898	0.843211
ENSG00000074621	SLC24A1	9187	0.270833	0.164706	-1.28886	-1.6826	-0.39374	0.153641	0.289323
ENSG00000074657	ZNF532	55205	0.979167	1	4.3956	4.98121	0.585612	0.00449099	0.0191457
ENSG00000074660	SCARF1	8578	0.354167	0.294118	-0.659966	-0.964186	-0.30422	0.437942	0.601982
ENSG00000074695	LMAN1	3998	0.979167	0.988235	4.71282	4.11838	-0.594443	0.00109295	0.00610935
ENSG00000074696	HACD3	51495	0.958333	0.952941	4.76588	4.48852	-0.277363	0.167651	0.308212
ENSG00000074755	ZZEF1	23140	0.854167	0.8	2.44654	2.0776	-0.368934	0.249649	0.409228
ENSG00000074800	ENO1	2023	1	1	9.51565	9.51971	0.00406115	0.709553	0.819116
ENSG00000074842	MYDGF	56005	1	1	7.3195	7.10452	-0.214982	0.0313383	0.0889272
ENSG00000074855	ANO8	57719	0.354167	0.294118	-1.12087	-1.16873	-0.0478618	0.672038	0.792855
ENSG00000074935	TUBE1	51175	0.875	0.894118	3.05244	3.23331	0.180874	0.791094	0.874834
ENSG00000074964	ARHGEF10L	55160	0.3125	0.282353	-1.20504	-0.966482	0.238555	0.944277	0.969504
ENSG00000075043	KCNQ2	3785	0.333333	0.6	-0.88494	0.333229	1.21817	0.0043345	0.0186359
ENSG00000075089	ACTR6	64431	0.895833	0.964706	3.55131	4.54453	0.993217	0.00239584	0.011589
ENSG00000075131	TIPIN	54962	1	1	5.56024	6.02	0.459761	0.00635261	0.0252631
ENSG00000075142	SRI	6717	1	1	6.65541	6.53724	-0.118169	0.321747	0.4878
ENSG00000075151	EIF4G3	8672	0.979167	0.988235	3.98107	4.9322	0.951125	0.000574305	0.00362868
ENSG00000075188	NUP37	79023	0.9375	0.988235	3.97782	4.69327	0.715451	0.0720097	0.166179
ENSG00000075213	SEMA3A	10371	0.25	0.294118	-1.48187	-1.2406	0.241268	0.523743	0.67743
ENSG00000075218	GTSE1	51512	0.916667	0.929412	2.92416	4.20435	1.28018	8.86172e-05	0.000818539
ENSG00000075223	SEMA3C	10512	0.75	0.576471	1.20455	0.215787	-0.988768	0.04115	0.10944
ENSG00000075234	TTC38	55020	0.875	0.870588	3.42729	3.64516	0.217869	0.189919	0.336651
ENSG00000075239	ACAT1	38	1	1	8.13952	8.42951	0.289991	0.00752248	0.0288367
ENSG00000075240	GRAMD4	23151	0.875	0.882353	3.12021	3.26925	0.149043	0.504012	0.660519
ENSG00000075275	CELSR1	9620	0.6875	0.847059	1.89961	3.11458	1.21497	0.0176771	0.0570147
ENSG00000075290	WNT8B	7479	0.270833	0.247059	-1.25533	-1.60611	-0.35078	0.539057	0.690555
ENSG00000075292	ZNF638	27332	1	0.988235	5.53765	5.74853	0.210889	0.0694576	0.161252
ENSG00000075303	SLC25A40	55972	0.583333	0.705882	0.0842693	1.14887	1.0646	0.011401	0.0404112
ENSG00000075336	TIMM21	29090	0.979167	0.976471	4.76509	4.70221	-0.0628764	0.97197	0.984371
ENSG00000075340	ADD2	119	0.916667	0.952941	3.43574	4.31782	0.882085	0.0309538	0.0880996
ENSG00000075391	RASAL2	9462	0.6875	0.717647	1.18974	1.23586	0.0461118	0.873698	0.927638
ENSG00000075399	VPS9D1	9605	0.625	0.423529	0.557508	-0.577344	-1.13485	0.0118763	0.0417012
ENSG00000075407	ZNF37A	7587	0.645833	0.352941	0.610415	-0.93518	-1.5456	0.000441398	0.00292091
ENSG00000075413	MARK3	4140	1	1	6.78255	7.31437	0.531819	0.00558556	0.0227911
ENSG00000075415	SLC25A3	5250	1	1	8.83919	8.75939	-0.079797	0.265844	0.427278
ENSG00000075420	FNDC3B	64778	0.958333	0.976471	4.35493	4.35128	-0.00365294	0.634408	0.764896
ENSG00000075426	FOSL2	2355	1	1	5.37144	5.09006	-0.281384	0.220529	0.373987
ENSG00000075429	CACNG5	27091	0.25	0.258824	-1.28882	-1.2745	0.0143178	0.914823	0.951625
ENSG00000075539	FRYL	285527	0.75	0.670588	1.19476	0.583204	-0.611559	0.122074	0.244391
ENSG00000075568	TMEM131	23505	0.895833	0.870588	2.83548	2.9124	0.0769161	0.821921	0.894878
ENSG00000075618	FSCN1	6624	0.875	0.529412	3.78808	0.372766	-3.41532	4.34063e-08	1.43723e-06
ENSG00000075624	ACTB	60	1	1	10.6904	10.2181	-0.472274	1.37719e-07	3.81397e-06
ENSG00000075643	MOCOS	55034	0.833333	0.952941	2.55935	4.27004	1.71069	8.58639e-06	0.00011933
ENSG00000075651	PLD1	5337	0.833333	0.552941	2.02237	0.133889	-1.88848	7.97301e-05	0.000754076
ENSG00000075673	ATP12A	479	0.416667	0.611765	-0.387542	0.874773	1.26231	0.0136317	0.0464448
ENSG00000075702	WDR62	284403	0.791667	0.964706	2.78376	4.44085	1.65709	0.00474263	0.0199934
ENSG00000075711	DLG1	1739	0.979167	0.976471	4.73547	5.19494	0.459467	0.000788477	0.00467052
ENSG00000075785	RAB7A	7879	1	1	7.64748	7.74823	0.100751	0.495451	0.653259
ENSG00000075790	BCAP29	55973	1	1	6.67631	7.0924	0.416087	0.00591551	0.0238589
ENSG00000075826	SEC31B	25956	0.75	0.764706	2.15377	1.97425	-0.179515	0.808026	0.885744
ENSG00000075856	SART3	9733	0.9375	0.964706	4.72304	5.31741	0.594363	0.00604145	0.0242807
ENSG00000075884	ARHGAP15	55843	1	1	7.04228	7.15954	0.11726	0.416307	0.582305
ENSG00000075886	TUBA3D	113457	0.875	0.917647	3.40921	3.92302	0.513811	0.400155	0.566557
ENSG00000075891	PAX2	5076	0.208333	0.105882	-1.4711	-1.74855	-0.277445	0.15103	0.285863
ENSG00000075914	EXOSC7	23016	1	1	6.72368	6.80464	0.0809616	0.333319	0.500172
ENSG00000075945	KIFAP3	22920	1	1	6.00139	6.81791	0.816517	5.01656e-05	0.000513174
ENSG00000075975	MKRN2	23609	1	1	6.8521	7.48066	0.628556	0.00103135	0.0058332
ENSG00000076003	MCM6	4175	1	0.988235	5.75244	6.36726	0.614815	0.041788	0.110717
ENSG00000076043	REXO2	25996	1	1	9.48088	9.6032	0.122321	0.140636	0.271072
ENSG00000076053	RBM7	10179	0.895833	0.894118	3.34607	3.15717	-0.188909	0.490765	0.649423
ENSG00000076067	RBMS2	5939	0.895833	0.917647	2.77437	2.96644	0.192066	0.523871	0.677547
ENSG00000076108	BAZ2A	11176	0.979167	1	4.81755	5.36973	0.55218	0.0493736	0.125106
ENSG00000076201	PTPN23	25930	0.9375	1	4.94204	5.88052	0.938487	0.0155288	0.0513724
ENSG00000076242	MLH1	4292	0.958333	0.952941	4.09497	4.2916	0.196622	0.578761	0.720419
ENSG00000076248	UNG	7374	1	1	8.05601	8.87577	0.819761	1.01599e-09	5.54617e-08
ENSG00000076258	FMO4	2329	0.145833	0.0588235	-1.58323	-2.04241	-0.459181	0.0924385	0.200375
ENSG00000076321	KLHL20	27252	0.958333	0.976471	4.79981	5.25829	0.458474	0.0149379	0.0498825
ENSG00000076351	SLC46A1	113235	0.354167	0.235294	-0.805949	-1.30261	-0.496661	0.168822	0.309827
ENSG00000076356	PLXNA2	5362	0.479167	0.470588	-0.113708	-0.289925	-0.176217	0.823508	0.895526
ENSG00000076382	SPAG5	10615	0.9375	0.976471	4.33023	5.70158	1.37135	2.77942e-05	0.000316519
ENSG00000076513	ANKRD13A	88455	1	0.952941	4.17926	4.75718	0.57792	0.00117701	0.00648057
ENSG00000076554	TPD52	7163	1	1	6.95496	7.88439	0.929428	3.32038e-07	7.99442e-06
ENSG00000076555	ACACB	32	0.458333	0.317647	-0.516766	-1.09806	-0.581292	0.115594	0.234753
ENSG00000076604	TRAF4	9618	0.875	0.894118	3.55218	3.54149	-0.0106896	0.820125	0.893649
ENSG00000076641	PAG1	55824	0.8125	0.764706	2.03663	1.70244	-0.334182	0.606076	0.743103
ENSG00000076650	GPATCH1	55094	1	0.976471	5.10029	5.92032	0.820031	6.27721e-07	1.36008e-05
ENSG00000076662	ICAM3	3385	0.770833	0.835294	1.57832	2.48897	0.910645	0.0203547	0.0637726
ENSG00000076685	NT5C2	22978	0.833333	0.894118	2.78443	3.24104	0.456613	0.364148	0.531515
ENSG00000076706	MCAM	4162	0.645833	0.576471	0.853309	0.683169	-0.170139	0.784474	0.870796
ENSG00000076716	GPC4	2239	0.8125	0.847059	2.7414	2.80428	0.0628724	0.943848	0.969357
ENSG00000076770	MBNL3	55796	0.583333	0.552941	0.725554	0.450607	-0.274947	0.665045	0.787108
ENSG00000076826	CAMSAP3	57662	0.895833	0.964706	3.44067	4.20922	0.768551	0.0496208	0.125645
ENSG00000076864	RAP1GAP	5909	0.541667	0.611765	0.482278	0.954673	0.472394	0.320293	0.486731
ENSG00000076924	XAB2	56949	1	1	8.61649	9.10355	0.487058	0.000170117	0.0013665
ENSG00000076928	ARHGEF1	9138	0.666667	0.588235	1.72645	0.918554	-0.807897	0.0812515	0.181807
ENSG00000076944	STXBP2	6813	0.979167	1	7.17131	7.76381	0.592504	0.00393148	0.0172458
ENSG00000076984	MAP2K7	5609	0.979167	1	5.64329	6.42318	0.779892	0.000400877	0.00270898
ENSG00000077009	NMRK2	27231	1	1	8.52615	8.84523	0.319078	0.0255889	0.0763424
ENSG00000077044	DGKD	8527	0.958333	0.917647	4.10506	3.67273	-0.432326	0.469102	0.630625
ENSG00000077063	CTTNBP2	83992	0.770833	0.929412	1.84442	3.08276	1.23833	0.00287862	0.0134553
ENSG00000077092	RARB	5915	0.916667	0.964706	2.30989	3.3998	1.08991	0.00152639	0.00802091
ENSG00000077097	TOP2B	7155	0.979167	0.976471	4.32361	4.86173	0.538111	0.00143187	0.00761013
ENSG00000077147	TM9SF3	56889	1	0.988235	3.8953	4.26249	0.367188	0.16767	0.308212
ENSG00000077150	NFKB2	4791	1	1	6.66556	6.921	0.255436	0.0413194	0.10973
ENSG00000077152	UBE2T	29089	1	1	5.80394	6.29648	0.492535	9.42509e-05	0.000857075
ENSG00000077157	PPP1R12B	4660	0.916667	0.741176	3.28453	1.35751	-1.92702	3.19067e-05	0.000354307
ENSG00000077232	DNAJC10	54431	0.9375	0.988235	4.35441	5.0991	0.74469	0.0424966	0.112233
ENSG00000077235	GTF3C1	2975	0.979167	1	5.61474	6.27897	0.664223	0.0673268	0.157431
ENSG00000077238	IL4R	3566	0.541667	0.576471	0.438948	0.652775	0.213827	0.73017	0.834382
ENSG00000077254	USP33	23032	1	0.988235	5.0621	5.46583	0.403725	0.0131125	0.0450759
ENSG00000077264	PAK3	5063	0.354167	0.294118	-0.833005	-1.07281	-0.2398	0.493501	0.651762
ENSG00000077312	SNRPA	6626	1	1	7.3768	7.35902	-0.017781	0.794851	0.87696
ENSG00000077327	SPAG6	9576	0.979167	0.988235	4.88604	5.48671	0.600667	0.00570723	0.0231746
ENSG00000077348	EXOSC5	56915	1	1	5.84642	5.89324	0.0468171	0.651196	0.7775
ENSG00000077380	DYNC1I2	1781	1	1	6.89015	7.17674	0.286588	0.092133	0.199856
ENSG00000077454	LRCH4	4034	1	1	6.17412	6.5723	0.398176	0.0223757	0.0685217
ENSG00000077458	FAM76B	143684	0.958333	1	4.32111	4.75838	0.43727	0.136887	0.265877
ENSG00000077463	SIRT6	51548	0.8125	0.776471	2.83597	2.24329	-0.592682	0.0729162	0.167675
ENSG00000077514	POLD3	10714	0.916667	0.976471	3.58524	4.30595	0.720711	0.0167664	0.0546264
ENSG00000077522	ACTN2	88	0.291667	0.211765	-0.939695	-1.31699	-0.377293	0.272776	0.434958
ENSG00000077549	CAPZB	832	1	1	8.18881	8.35394	0.165126	0.0521461	0.130118
ENSG00000077585	GPR137B	7107	0.895833	0.964706	3.84882	4.59451	0.745692	0.0507192	0.127627
ENSG00000077616	NAALAD2	10003	1	1	5.73374	6.5553	0.82156	0.000149141	0.00123231
ENSG00000077684	JADE1	79960	0.979167	0.988235	4.39006	5.02947	0.639408	0.0276692	0.0810066
ENSG00000077713	SLC25A43	203427	0.645833	0.635294	1.28662	1.20559	-0.0810358	0.701032	0.813129
ENSG00000077721	UBE2A	7319	1	1	7.73417	8.0609	0.326729	0.00550571	0.0225107
ENSG00000077782	FGFR1	2260	0.916667	0.929412	4.29936	4.16332	-0.136041	0.379608	0.546589
ENSG00000077800	FKBP6	8468	0.979167	0.988235	5.19784	5.59551	0.397672	0.0354168	0.0978875
ENSG00000077935	SMC1B	27127	0.895833	0.988235	3.05082	3.53582	0.485001	0.33447	0.501593
ENSG00000077942	FBLN1	2192	1	1	6.31266	5.5639	-0.748757	0.00449099	0.0191457
ENSG00000078018	MAP2	4133	0.520833	0.364706	0.145063	-0.66723	-0.812294	0.0551349	0.135566
ENSG00000078043	PIAS2	9063	0.979167	1	6.13662	7.04757	0.910942	7.72997e-09	3.23768e-07
ENSG00000078053	AMPH	273	0.854167	0.905882	3.22739	3.76358	0.536185	0.516122	0.670897
ENSG00000078061	ARAF	369	1	1	6.25894	6.31392	0.0549769	0.98318	0.990481
ENSG00000078070	MCCC1	56922	0.8125	0.752941	1.97388	2.1626	0.188724	0.491476	0.650081
ENSG00000078081	LAMP3	27074	0.875	0.964706	2.60222	4.24596	1.64374	1.90535e-05	0.000231212
ENSG00000078114	NEBL	10529	0.645833	0.776471	1.14479	2.0304	0.885611	0.0649617	0.1535
ENSG00000078124	ACER3	55331	0.5	0.552941	-0.153689	0.136112	0.289801	0.509416	0.664989
ENSG00000078140	UBE2K	3093	0.979167	1	4.8102	5.05566	0.245454	0.634412	0.764896
ENSG00000078142	PIK3C3	5289	1	0.976471	4.07443	4.77281	0.698373	0.00476201	0.0200426
ENSG00000078177	N4BP2	55728	0.541667	0.564706	0.107554	0.239977	0.132423	0.793046	0.875926
ENSG00000078237	TIGAR	57103	0.5	0.482353	-0.333783	-0.0578378	0.275945	0.612961	0.748667
ENSG00000078246	TULP3	7289	1	1	6.22566	6.92047	0.69481	3.8054e-06	6.19289e-05
ENSG00000078269	SYNJ2	8871	0.875	0.929412	2.95957	4.04209	1.08252	0.0020596	0.0102182
ENSG00000078295	ADCY2	108	0.541667	0.541176	-0.0518974	0.143274	0.195171	0.750559	0.848131
ENSG00000078304	PPP2R5C	5527	1	1	6.77681	6.76631	-0.0104975	0.528609	0.681705
ENSG00000078319	PMS2P1	.	0.9375	0.976471	3.06265	3.17175	0.109097	0.849508	0.912672
ENSG00000078328	RBFOX1	54715	1	1	6.28058	6.90817	0.627584	3.02482e-08	1.03162e-06
ENSG00000078369	GNB1	2782	1	1	6.77952	6.9383	0.158778	0.290756	0.455282
ENSG00000078399	HOXA9	3205	0.770833	0.882353	2.08566	3.20114	1.11548	0.0259203	0.0770153
ENSG00000078401	EDN1	1906	0.4375	0.517647	-0.641961	-0.364547	0.277413	0.47789	0.638193
ENSG00000078403	MLLT10	8028	1	0.976471	4.13728	4.38366	0.24638	0.282283	0.446088
ENSG00000078487	ZCWPW1	55063	0.979167	0.988235	4.70284	4.75855	0.0557125	0.735876	0.838038
ENSG00000078549	ADCYAP1R1	117	0.25	0.376471	-1.26029	-0.626486	0.633801	0.125746	0.250007
ENSG00000078596	ITM2A	9452	0.75	0.647059	2.13868	0.829292	-1.30939	0.00853402	0.0319201
ENSG00000078618	NRDC	4898	0.979167	0.988235	4.43327	4.79415	0.360882	0.13141	0.257938
ENSG00000078668	VDAC3	7419	1	1	8.46315	8.59708	0.13393	0.86054	0.919575
ENSG00000078674	PCM1	5108	1	1	6.69892	6.95431	0.255383	0.225869	0.380524
ENSG00000078687	TNRC6C	57690	0.791667	0.682353	1.89377	1.13648	-0.757296	0.0572248	0.139779
ENSG00000078699	CBFA2T2	9139	0.854167	0.788235	2.86806	2.48135	-0.386714	0.871172	0.926325
ENSG00000078725	BRINP1	1620	0.958333	0.976471	4.68252	5.04835	0.365834	0.820249	0.893649
ENSG00000078747	ITCH	83737	0.9375	0.870588	3.4412	3.11854	-0.322662	0.739265	0.840317
ENSG00000078804	TP53INP2	58476	0.9375	0.941176	3.42596	3.9277	0.501732	0.0501675	0.126595
ENSG00000078808	SDF4	51150	0.979167	1	6.28978	5.93053	-0.359255	0.00134187	0.00721244
ENSG00000078814	MYH7B	57644	0.625	0.788235	1.50259	2.56348	1.06089	0.126984	0.251723
ENSG00000078900	TP73	7161	0.25	0.235294	-1.58288	-1.38699	0.195895	0.977566	0.987681
ENSG00000078902	TOLLIP	54472	1	1	6.73494	6.82167	0.0867272	0.678419	0.797433
ENSG00000078967	UBE2D4	51619	1	0.976471	5.24478	4.74291	-0.501874	0.0291936	0.0841421
ENSG00000079101	CLUL1	27098	0.8125	0.835294	2.23207	2.65262	0.420547	0.219335	0.372589
ENSG00000079102	RUNX1T1	862	1	1	6.6115	7.04721	0.43571	0.000788526	0.00467052
ENSG00000079112	CDH17	1015	0.875	0.988235	3.71402	5.1653	1.45128	0.000269651	0.00196503
ENSG00000079134	THOC1	9984	0.979167	0.988235	4.60188	5.03746	0.435577	0.464866	0.626832
ENSG00000079150	FKBP7	51661	0.833333	0.341176	1.99622	-0.972232	-2.96846	1.84135e-10	1.29236e-08
ENSG00000079156	OSBPL6	114880	0.625	0.8	0.94343	1.86312	0.919688	0.050013	0.126304
ENSG00000079246	XRCC5	7520	1	1	6.36074	6.41262	0.0518856	0.387379	0.553817
ENSG00000079257	LXN	56925	0.979167	0.952941	5.11166	4.2664	-0.845262	0.000279822	0.00202082
ENSG00000079277	MKNK1	8569	0.979167	0.988235	4.76414	4.94144	0.177297	0.339205	0.506369
ENSG00000079308	TNS1	7145	0.854167	0.529412	3.04993	0.347439	-2.70249	1.03266e-06	2.08344e-05
ENSG00000079313	REXO1	57455	0.895833	0.976471	3.87715	4.85758	0.980434	0.0192674	0.0610285
ENSG00000079332	SAR1A	56681	1	1	5.75386	6.09324	0.33938	0.0550475	0.135406
ENSG00000079335	CDC14A	8556	0.270833	0.270588	-1.16751	-1.38005	-0.212542	0.771486	0.86233
ENSG00000079337	RAPGEF3	10411	0.583333	0.223529	0.637323	-1.41824	-2.05556	9.00401e-06	0.000123809
ENSG00000079387	SENP1	29843	0.854167	0.882353	2.19295	2.34129	0.148342	0.73738	0.839208
ENSG00000079432	CIC	23152	0.854167	0.694118	2.5275	1.10826	-1.41924	0.00245675	0.0118396
ENSG00000079435	LIPE	3991	0.645833	0.823529	1.3144	2.74902	1.43462	0.00529865	0.0218241
ENSG00000079459	FDFT1	2222	1	1	9.75355	10.5152	0.761674	1.66452e-06	3.12579e-05
ENSG00000079462	PAFAH1B3	5050	1	1	6.59155	6.39318	-0.198371	0.0967482	0.207099
ENSG00000079482	OPHN1	4983	0.708333	0.858824	0.951766	1.68536	0.733598	0.10624	0.220812
ENSG00000079616	KIF22	3835	1	1	8.20097	8.57906	0.378089	0.00257159	0.012292
ENSG00000079689	SCGN	10590	0.145833	0.0588235	-1.52284	-2.00906	-0.486217	0.094279	0.203443
ENSG00000079691	CARMIL1	55604	1	1	5.67002	6.30863	0.638609	1.11575e-06	2.22148e-05
ENSG00000079739	PGM1	5236	1	0.976471	5.60366	4.94055	-0.663109	0.00261156	0.012457
ENSG00000079785	DDX1	1653	1	1	8.17933	8.73145	0.552115	0.00343602	0.0154795
ENSG00000079805	DNM2	1785	1	1	6.27928	6.66985	0.390576	0.224079	0.378454
ENSG00000079819	EPB41L2	2037	1	0.976471	4.48654	5.1175	0.630968	0.00170919	0.00877932
ENSG00000079841	RIMS1	22999	0.354167	0.411765	-0.875844	-0.547446	0.328399	0.372447	0.539727
ENSG00000079931	MOXD1	26002	0.208333	0.223529	-1.49782	-1.56032	-0.0624942	0.971547	0.984371
ENSG00000079950	STX7	8417	0.9375	0.964706	4.29996	4.86061	0.560647	0.386073	0.552645
ENSG00000079974	RABL2B	11158	0.916667	0.976471	3.92472	4.34499	0.420261	0.369604	0.53691
ENSG00000079999	KEAP1	9817	0.729167	0.435294	2.24085	-0.0562436	-2.29709	4.62944e-05	0.000480331
ENSG00000080007	DDX43	55510	1	1	6.03458	6.78222	0.747642	0.000653627	0.00400865
ENSG00000080031	PTPRH	5794	0.125	0.0941176	-1.73716	-1.94626	-0.209098	0.558615	0.706057
ENSG00000080166	DCT	1638	0.5625	0.729412	0.285436	1.8163	1.53087	0.00177353	0.00904835
ENSG00000080189	SLC35C2	51006	0.979167	0.988235	5.43354	5.38932	-0.0442214	0.210974	0.362587
ENSG00000080200	CRYBG3	131544	0.833333	0.8	1.99396	2.04958	0.055619	0.990624	0.995254
ENSG00000080224	EPHA6	285220	0.270833	0.376471	-1.37559	-1.10996	0.265631	0.290902	0.455432
ENSG00000080298	RFX3	5991	0.854167	0.8	2.84137	2.40131	-0.440067	0.5228	0.676547
ENSG00000080345	RIF1	55183	0.958333	0.929412	4.12835	4.23598	0.107634	0.21523	0.367451
ENSG00000080371	RAB21	23011	0.916667	0.858824	2.82186	2.73424	-0.0876209	0.594582	0.73351
ENSG00000080503	SMARCA2	6595	1	1	6.74386	8.34203	1.59817	2.28442e-07	5.84054e-06
ENSG00000080546	SESN1	27244	1	1	6.11588	7.05907	0.943189	2.41193e-06	4.20768e-05
ENSG00000080561	MID2	11043	0.708333	0.670588	1.39214	1.31341	-0.0787263	0.755183	0.85108
ENSG00000080573	COL5A3	50509	0.1875	0.141176	-1.57459	-1.64567	-0.0710773	0.554846	0.702926
ENSG00000080603	SRCAP	10847	0.833333	0.835294	2.67037	3.18241	0.512042	0.159625	0.297466
ENSG00000080608	PUM3	9933	1	1	5.09064	5.36465	0.274009	0.112769	0.230578
ENSG00000080644	CHRNA3	1136	1	1	6.43848	6.88569	0.447202	0.00912877	0.0337831
ENSG00000080709	KCNN2	3781	0.979167	0.964706	3.61053	4.2548	0.644267	0.0142746	0.0481186
ENSG00000080802	CNOT4	4850	1	1	5.51069	6.16957	0.658885	0.000123363	0.00105579
ENSG00000080815	PSEN1	5663	0.979167	1	6.29443	7.14227	0.847844	0.000128156	0.00108658
ENSG00000080819	CPOX	1371	0.958333	0.976471	4.23009	4.88932	0.659233	0.048297	0.123124
ENSG00000080822	CLDND1	56650	1	1	5.99762	6.4268	0.42918	0.135655	0.264189
ENSG00000080823	MOK	5891	1	1	6.20327	6.85931	0.656045	2.3557e-05	0.000275737
ENSG00000080824	HSP90AA1	3320	1	1	10.8198	11.032	0.212113	0.0593346	0.143371
ENSG00000080839	RBL1	5933	0.5	0.611765	-0.153911	0.997497	1.15141	0.0205569	0.0642399
ENSG00000080845	DLGAP4	22839	1	1	8.39953	8.80193	0.402397	0.00626293	0.0249699
ENSG00000080854	IGSF9B	22997	0.354167	0.447059	-0.618744	-0.563465	0.0552799	0.62952	0.761422
ENSG00000080947	CROCCP3	114819	0.270833	0.235294	-1.27699	-1.37535	-0.0983629	0.687973	0.803933
ENSG00000080986	NDC80	10403	0.958333	0.988235	5.41133	5.9613	0.549963	0.0709073	0.163992
ENSG00000081014	AP4E1	23431	0.166667	0.282353	-1.68258	-1.2285	0.454084	0.134491	0.262371
ENSG00000081019	RSBN1	54665	0.770833	0.682353	1.30613	0.651994	-0.654137	0.103947	0.217365
ENSG00000081026	MAGI3	260425	0.625	0.505882	0.724949	0.00865723	-0.716292	0.116258	0.235654
ENSG00000081041	CXCL2	2920	0.1875	0.164706	-1.01822	-1.5908	-0.57258	0.588983	0.728633
ENSG00000081052	COL4A4	1286	0.708333	0.694118	1.62236	0.945705	-0.676652	0.0577455	0.14074
ENSG00000081059	TCF7	6932	0.9375	0.988235	4.2591	5.31425	1.05515	6.18308e-05	0.000608533
ENSG00000081087	OSTM1	28962	0.666667	0.717647	0.810502	1.3818	0.571294	0.215948	0.368384
ENSG00000081138	CDH7	1005	0.4375	0.458824	-0.59502	-0.292285	0.302735	0.513225	0.667993
ENSG00000081154	PCNP	57092	1	1	6.20525	6.20021	-0.00503527	0.483674	0.643469
ENSG00000081177	EXD2	55218	0.708333	0.741176	1.23724	1.87416	0.636912	0.136686	0.265844
ENSG00000081181	ARG2	384	1	1	8.57708	9.12628	0.549198	0.000109977	0.000964849
ENSG00000081189	MEF2C	4208	0.520833	0.152941	-0.264421	-1.80187	-1.53745	4.63318e-06	7.30459e-05
ENSG00000081277	PKP1	5317	0.104167	0.105882	-1.95104	-1.79171	0.159332	0.898517	0.942321
ENSG00000081307	UBA5	79876	0.979167	0.988235	4.55312	5.00523	0.452105	0.0219657	0.0675851
ENSG00000081320	STK17B	9262	0.979167	0.988235	4.75752	5.15622	0.398705	0.0144625	0.0486222
ENSG00000081377	CDC14B	8555	0.375	0.341176	-0.891596	-0.908838	-0.0172417	0.893107	0.939033
ENSG00000081386	ZNF510	22869	0.666667	0.776471	0.784512	0.967194	0.182682	0.692985	0.807511
ENSG00000081479	LRP2	4036	0.270833	0.4	-1.24463	-0.568453	0.676178	0.114205	0.232763
ENSG00000081665	ZNF506	440515	0.708333	0.717647	0.911982	1.15692	0.244942	0.43271	0.597116
ENSG00000081692	JMJD4	65094	1	0.894118	4.77907	4.10897	-0.670101	0.421629	0.587318
ENSG00000081721	DUSP12	11266	0.9375	0.929412	4.16762	3.63739	-0.530232	0.0652089	0.153901
ENSG00000081760	AACS	65985	0.958333	0.988235	4.83839	5.70786	0.869469	0.00977235	0.0356831
ENSG00000081791	DELE1	9812	0.9375	0.764706	3.2279	2.14904	-1.07886	0.0261425	0.0775361
ENSG00000081803	CADPS2	93664	1	1	5.05579	5.80761	0.751818	0.00110204	0.00614882
ENSG00000081870	HSPB11	51668	1	1	5.15083	5.37054	0.219711	0.0215627	0.0666042
ENSG00000081913	PHLPP1	23239	0.708333	0.823529	1.6165	2.53903	0.922527	0.0618612	0.148029
ENSG00000081923	ATP8B1	5205	0.395833	0.4	-1.03709	-0.45992	0.577168	0.393798	0.560262
ENSG00000082014	SMARCD3	6604	0.958333	0.8	4.36351	2.36317	-2.00035	6.59108e-06	9.60037e-05
ENSG00000082068	WDR70	55100	1	1	4.89519	5.22269	0.327498	0.049918	0.126117
ENSG00000082146	STRADB	55437	1	1	6.5915	6.99657	0.405061	0.124948	0.248746
ENSG00000082153	BZW1	9689	1	1	5.80425	6.51367	0.709427	0.000347579	0.00241156
ENSG00000082175	PGR	5241	0.8125	0.811765	2.25869	2.10418	-0.154513	0.673972	0.794672
ENSG00000082212	ME2	4200	0.916667	0.964706	3.86689	4.62867	0.761785	0.015723	0.0518963
ENSG00000082213	C5orf22	55322	0.6875	0.858824	1.18148	2.28008	1.0986	0.00596161	0.0240288
ENSG00000082258	CCNT2	905	0.854167	0.952941	3.4387	4.27376	0.835056	0.0220644	0.0678543
ENSG00000082269	FAM135A	57579	0.583333	0.682353	0.338389	0.903077	0.564688	0.194906	0.34264
ENSG00000082397	EPB41L3	23136	1	1	6.67461	7.02889	0.354278	0.00653543	0.0258039
ENSG00000082438	COBLL1	22837	0.9375	0.952941	3.16364	3.65008	0.486437	0.033997	0.0947625
ENSG00000082458	DLG3	1741	0.520833	0.294118	-0.0550496	-1.10135	-1.0463	0.0104537	0.0376257
ENSG00000082512	TRAF5	7188	1	1	5.28883	5.73121	0.442379	0.00691535	0.0270048
ENSG00000082515	MRPL22	29093	1	1	6.59362	6.46543	-0.128187	0.205052	0.35557
ENSG00000082516	GEMIN5	25929	0.833333	0.858824	2.85721	3.27335	0.416139	0.191217	0.338127
ENSG00000082556	OPRK1	4986	0.104167	0.0352941	-1.87341	-2.18136	-0.307947	0.115355	0.234372
ENSG00000082641	NFE2L1	4779	0.895833	0.882353	3.29114	2.25385	-1.03729	0.00384804	0.0169698
ENSG00000082684	SEMA5B	54437	0.0208333	0.0470588	-2.2735	-2.09455	0.178953	0.442668	0.606027
ENSG00000082701	GSK3B	2932	0.9375	0.964706	3.62849	4.44043	0.81194	0.00894006	0.0331929
ENSG00000082781	ITGB5	3693	0.9375	0.941176	4.29642	4.13831	-0.158104	0.77502	0.864382
ENSG00000082805	ERC1	23085	0.958333	0.964706	4.55916	4.64958	0.0904162	0.986917	0.992871
ENSG00000082898	XPO1	7514	0.979167	1	4.59913	5.17544	0.576309	0.0344069	0.0956929
ENSG00000082996	RNF13	11342	0.958333	0.988235	4.87468	4.98166	0.106979	0.886375	0.935253
ENSG00000083067	TRPM3	80036	0.395833	0.470588	-0.954148	-0.196938	0.75721	0.13671	0.265844
ENSG00000083093	PALB2	79728	0.520833	0.564706	-0.132454	-0.0833978	0.0490564	0.878874	0.930691
ENSG00000083097	DOP1A	23033	0.895833	0.976471	3.48933	5.12273	1.6334	1.82966e-05	0.000222919
ENSG00000083099	LYRM2	57226	0.979167	0.952941	4.02093	3.88873	-0.132194	0.540931	0.691945
ENSG00000083123	BCKDHB	594	0.729167	0.729412	1.70844	1.23237	-0.476066	0.234928	0.391903
ENSG00000083168	KAT6A	7994	0.708333	0.564706	1.19798	0.294803	-0.903176	0.0570895	0.139486
ENSG00000083223	TUT7	79670	0.6875	0.741176	1.0481	1.36067	0.312576	0.502747	0.659773
ENSG00000083290	ULK2	9706	0.9375	0.976471	4.41975	5.01155	0.591802	0.0403905	0.107923
ENSG00000083307	GRHL2	79977	1	1	5.58858	6.53017	0.941586	2.19946e-06	3.90447e-05
ENSG00000083312	TNPO1	3842	0.979167	1	5.66229	6.42984	0.767548	0.000290266	0.00207817
ENSG00000083444	PLOD1	5351	0.958333	0.929412	5.09409	4.22098	-0.873113	0.00475758	0.0200426
ENSG00000083454	P2RX5	5026	0.8125	0.858824	2.02265	2.44578	0.423131	0.294106	0.458907
ENSG00000083457	ITGAE	3682	0.958333	0.976471	3.14351	2.98753	-0.15598	0.61781	0.752531
ENSG00000083520	DIS3	22894	0.791667	0.682353	1.97472	1.11787	-0.856851	0.0671683	0.157321
ENSG00000083535	PIBF1	10464	0.979167	1	5.33218	6.03147	0.69929	0.000241901	0.00180069
ENSG00000083544	TDRD3	81550	0.895833	0.988235	3.34062	4.49593	1.1553	0.00100542	0.00572214
ENSG00000083635	NUFIP1	26747	0.958333	1	4.29344	5.03808	0.744637	0.00155237	0.00812536
ENSG00000083642	PDS5B	23047	0.916667	0.964706	3.51703	3.32939	-0.18764	0.276005	0.438393
ENSG00000083720	OXCT1	5019	0.770833	0.705882	1.62501	1.44105	-0.183959	0.798311	0.879349
ENSG00000083750	RRAGB	10325	1	1	6.40859	6.90737	0.498774	0.0834336	0.185683
ENSG00000083799	CYLD	1540	0.625	0.682353	0.883714	1.02013	0.136416	0.721848	0.82855
ENSG00000083807	SLC27A5	10998	0.958333	0.964706	3.63043	3.48727	-0.143154	0.544036	0.69427
ENSG00000083812	ZNF324	25799	0.770833	0.776471	2.26991	2.5455	0.275592	0.485561	0.64545
ENSG00000083814	ZNF671	79891	0.541667	0.458824	0.424672	0.0577736	-0.366899	0.547518	0.69668
ENSG00000083817	ZNF416	55659	0.895833	0.952941	4.40357	5.00816	0.604582	0.0427068	0.112642
ENSG00000083828	ZNF586	54807	0.9375	0.941176	3.96639	4.8495	0.883112	0.00172094	0.00883459
ENSG00000083838	ZNF446	55663	0.645833	0.588235	0.89846	0.21244	-0.68602	0.0945807	0.203828
ENSG00000083844	ZNF264	9422	0.375	0.341176	-0.850618	-1.16996	-0.319346	0.501668	0.658863
ENSG00000083845	RPS5	6193	1	1	10.7732	10.2465	-0.526702	3.08228e-07	7.51068e-06
ENSG00000083857	FAT1	2195	0.625	0.517647	0.844659	0.217234	-0.627425	0.175125	0.317643
ENSG00000083896	YTHDC1	91746	1	1	5.59795	5.64216	0.0442133	0.550283	0.699201
ENSG00000083937	CHMP2B	25978	1	1	5.4885	5.817	0.328502	0.0141832	0.0478601
ENSG00000084070	SMAP2	64744	1	1	5.93442	6.61473	0.680302	2.64402e-06	4.55574e-05
ENSG00000084072	PPIE	10450	1	1	6.63998	6.45302	-0.186964	0.100572	0.212853
ENSG00000084073	ZMPSTE24	10269	0.791667	0.870588	2.00622	3.06498	1.05876	0.00303279	0.0139959
ENSG00000084090	STARD7	56910	1	1	6.09993	6.87903	0.779098	9.03683e-06	0.000123926
ENSG00000084092	NOA1	84273	0.9375	1	5.45808	6.32036	0.86228	0.0240812	0.0727661
ENSG00000084093	REST	5978	0.958333	0.905882	4.28236	3.97778	-0.304576	0.860511	0.919575
ENSG00000084110	HAL	3034	0.333333	0.470588	-0.660424	-0.266215	0.394209	0.295415	0.460356
ENSG00000084112	SSH1	54434	1	0.988235	4.7653	5.23564	0.470334	0.0673268	0.157431
ENSG00000084207	GSTP1	2950	1	1	7.45247	6.36001	-1.09246	5.50353e-11	4.76396e-09
ENSG00000084234	APLP2	334	1	1	7.0183	7.15563	0.137325	0.250076	0.40954
ENSG00000084444	FAM234B	57613	0.979167	0.976471	5.81605	5.71126	-0.104796	0.236823	0.39416
ENSG00000084453	SLCO1A2	6579	0.541667	0.611765	-0.108843	0.654264	0.763107	0.0884922	0.19423
ENSG00000084463	WBP11	51729	1	1	7.3987	7.78231	0.383611	0.0165584	0.0541169
ENSG00000084623	EIF3I	8668	1	1	6.96542	6.70427	-0.261154	0.0232152	0.0706758
ENSG00000084636	COL16A1	1307	0.791667	0.282353	2.97606	-1.07282	-4.04888	2.59859e-11	2.46027e-09
ENSG00000084652	TXLNA	200081	0.979167	0.929412	4.60741	3.85692	-0.750497	0.0868075	0.191437
ENSG00000084676	NCOA1	8648	0.9375	0.976471	4.38358	4.46319	0.0796065	0.741173	0.841547
ENSG00000084693	AGBL5	60509	1	1	6.50691	6.89417	0.387263	0.024377	0.0734258
ENSG00000084710	EFR3B	22979	0.729167	0.729412	1.70068	2.29269	0.592015	0.211564	0.363309
ENSG00000084731	KIF3C	3797	0.833333	0.952941	2.75441	4.74469	1.99028	3.37032e-07	8.09322e-06
ENSG00000084733	RAB10	10890	1	1	7.17551	7.20431	0.0287955	0.723551	0.829511
ENSG00000084734	GCKR	2646	0.229167	0.2	-1.27681	-1.60225	-0.325442	0.587606	0.727623
ENSG00000084754	HADHA	3030	1	1	7.11451	6.68231	-0.432199	0.00550571	0.0225107
ENSG00000084764	MAPRE3	22924	1	1	6.2278	6.91245	0.68465	0.000179931	0.00142642
ENSG00000084774	CAD	790	0.979167	0.905882	5.05119	4.77715	-0.274035	0.780399	0.868271
ENSG00000085063	CD59	966	1	1	8.36833	8.63855	0.270219	0.00191051	0.00959107
ENSG00000085117	CD82	3732	1	1	7.80742	8.20664	0.399216	0.000216625	0.00165454
ENSG00000085185	BCORL1	63035	1	1	6.6943	7.35973	0.66543	1.91412e-06	3.49696e-05
ENSG00000085224	ATRX	546	1	0.964706	4.946	4.26709	-0.678913	0.0212968	0.0659194
ENSG00000085231	AK6	102157402	1	1	5.6692	5.44589	-0.223311	0.0859706	0.190049
ENSG00000085274	MYNN	55892	0.895833	0.941176	3.28817	3.78086	0.492685	0.202457	0.352108
ENSG00000085365	SCAMP1	9522	0.958333	1	4.47883	5.72676	1.24792	1.3325e-05	0.000170224
ENSG00000085377	PREP	5550	0.979167	1	5.42959	6.37766	0.94807	2.25083e-06	3.96468e-05
ENSG00000085382	HACE1	57531	0.375	0.411765	-0.790297	-0.619649	0.170648	0.673698	0.794452
ENSG00000085415	SEH1L	81929	1	1	4.6352	5.28815	0.652959	0.00129881	0.00701421
ENSG00000085433	WDR47	22911	0.979167	0.976471	4.4232	4.84544	0.422248	0.0195185	0.0616755
ENSG00000085449	WDFY1	57590	0.979167	0.988235	4.94781	6.27217	1.32436	1.43084e-07	3.94686e-06
ENSG00000085465	OVGP1	5016	0.270833	0.129412	-1.22365	-1.83467	-0.611021	0.0382873	0.103832
ENSG00000085491	SLC25A24	29957	0.416667	0.223529	-0.696519	-1.49707	-0.80055	0.0165384	0.0541101
ENSG00000085511	MAP3K4	4216	0.8125	0.788235	2.05151	1.89022	-0.161285	0.520751	0.674904
ENSG00000085552	IGSF9	57549	0.354167	0.458824	-0.414803	0.220203	0.635005	0.205694	0.356479
ENSG00000085563	ABCB1	5243	0.104167	0.0823529	-1.93968	-2.06081	-0.121128	0.661137	0.784577
ENSG00000085644	ZNF213	7760	0.625	0.411765	0.726624	-0.432893	-1.15952	0.0151578	0.0504464
ENSG00000085662	AKR1B1	231	1	1	9.70955	9.92409	0.21454	0.0859706	0.190049
ENSG00000085719	CPNE3	8895	0.895833	0.752941	2.53211	1.51799	-1.01412	0.0305276	0.0873081
ENSG00000085721	RRN3	54700	0.958333	0.964706	3.60601	4.72798	1.12197	4.45248e-06	7.07272e-05
ENSG00000085733	CTTN	2017	1	1	7.27288	7.18348	-0.0893986	0.522497	0.676261
ENSG00000085741	WNT11	7481	0.25	0.294118	-1.14824	-1.08137	0.0668699	0.728617	0.833269
ENSG00000085760	MTIF2	4528	0.979167	0.988235	4.57846	5.02271	0.444248	0.0449443	0.116877
ENSG00000085788	DDHD2	23259	0.9375	0.988235	4.13985	4.47268	0.332825	0.496928	0.654861
ENSG00000085831	TTC39A	22996	1	1	6.54906	6.73213	0.183066	0.347557	0.514402
ENSG00000085832	EPS15	2060	0.9375	0.941176	3.27597	3.49622	0.220247	0.420298	0.58658
ENSG00000085840	ORC1	4998	0.958333	0.976471	4.27273	5.0886	0.815869	0.00074926	0.0044854
ENSG00000085871	MGST2	4258	1	1	5.65311	5.59952	-0.0535883	0.856861	0.917045
ENSG00000085872	CHERP	10523	0.979167	1	5.2983	6.17372	0.875429	2.78073e-05	0.000316519
ENSG00000085978	ATG16L1	55054	0.9375	0.964706	4.20892	5.30875	1.09983	0.0011291	0.00628056
ENSG00000085982	USP40	55230	0.791667	0.811765	2.15703	2.16275	0.00571569	0.848954	0.912672
ENSG00000085998	POMGNT1	55624	0.8125	0.788235	3.25696	2.41038	-0.846579	0.0295616	0.0850675
ENSG00000085999	RAD54L	8438	0.854167	0.929412	2.87882	3.7721	0.893281	0.0067928	0.0266292
ENSG00000086015	MAST2	23139	0.854167	0.788235	3.05556	2.07108	-0.98448	0.0318872	0.0902874
ENSG00000086061	DNAJA1	3301	1	1	10.5876	11.0053	0.417704	5.16821e-07	1.15842e-05
ENSG00000086062	B4GALT1	2683	1	1	5.67319	5.65055	-0.0226397	0.986917	0.992871
ENSG00000086065	CHMP5	51510	1	1	6.29505	6.27209	-0.0229616	0.534757	0.686789
ENSG00000086102	NFX1	4799	0.958333	1	4.95023	5.2942	0.343973	0.631077	0.762596
ENSG00000086189	DIMT1	27292	0.979167	1	4.98161	5.8454	0.863789	0.00185088	0.00934852
ENSG00000086200	IPO11	51194	0.770833	0.858824	1.79581	2.57931	0.783501	0.10362	0.216854
ENSG00000086232	EIF2AK1	27102	0.958333	1	4.91537	5.52565	0.610281	0.0255887	0.0763424
ENSG00000086289	EPDR1	54749	0.541667	0.188235	0.951823	-1.59566	-2.54748	3.39234e-06	5.63087e-05
ENSG00000086300	SNX10	29887	0.791667	0.823529	1.80586	2.34602	0.540163	0.0984817	0.209896
ENSG00000086475	SEPHS1	22929	0.958333	0.905882	4.53621	4.04147	-0.494741	0.333218	0.500172
ENSG00000086504	MRPL28	10573	1	0.988235	6.46373	6.2803	-0.183428	0.695652	0.809109
ENSG00000086506	HBQ1	3049	0.875	0.929412	2.0783	2.12301	0.0447059	0.413455	0.579861
ENSG00000086544	ITPKC	80271	0.291667	0.258824	-1.00427	-1.24488	-0.24061	0.625517	0.758651
ENSG00000086570	FAT2	2196	0.145833	0.176471	-1.74629	-1.47966	0.266628	0.569786	0.714058
ENSG00000086589	RBM22	55696	1	0.988235	6.15051	6.15111	0.000606718	0.547161	0.696275
ENSG00000086598	TMED2	10959	1	1	7.53175	8.0724	0.540649	0.00817697	0.030832
ENSG00000086619	ERO1B	56605	0.958333	1	4.98413	5.55269	0.568562	0.00304403	0.0140302
ENSG00000086666	ZFAND6	54469	1	1	7.62574	8.0414	0.41566	2.35704e-06	4.12776e-05
ENSG00000086712	TXLNG	55787	1	1	6.15589	6.70022	0.544334	3.8923e-06	6.30608e-05
ENSG00000086717	PPEF1	5475	0.854167	0.952941	2.83793	3.92324	1.08531	0.00699746	0.0272996
ENSG00000086758	HUWE1	10075	1	0.976471	5.98057	5.54273	-0.437837	0.553415	0.70168
ENSG00000086827	ZW10	9183	0.916667	0.941176	3.53065	4.35794	0.827294	0.0278114	0.0813042
ENSG00000086848	ALG9	79796	0.9375	0.952941	4.11651	5.2691	1.15259	3.55273e-05	0.000387446
ENSG00000086967	MYBPC2	4606	1	1	6.83665	7.31014	0.473491	0.0446948	0.116399
ENSG00000086991	NOX4	50507	0.5	0.564706	0.172343	0.288639	0.116296	0.784435	0.870796
ENSG00000087008	ACOX3	8310	0.5625	0.752941	0.709017	1.84173	1.13271	0.0333417	0.0934451
ENSG00000087053	MTMR2	8898	0.958333	1	4.72205	6.0158	1.29375	5.82267e-06	8.69027e-05
ENSG00000087074	PPP1R15A	23645	0.958333	0.870588	5.73398	3.15602	-2.57795	1.06475e-05	0.000141072
ENSG00000087076	HSD17B14	51171	0.875	0.564706	2.61827	0.552788	-2.06548	3.78287e-05	0.000407375
ENSG00000087077	TRIP6	7205	0.791667	0.352941	2.49967	-0.89824	-3.39791	4.70526e-10	2.90926e-08
ENSG00000087085	ACHE	43	0.395833	0.423529	-0.469221	-0.682144	-0.212923	0.908162	0.947828
ENSG00000087086	FTL	2512	1	1	10.5734	10.187	-0.38641	9.06652e-05	0.00083196
ENSG00000087087	SRRT	51593	1	1	7.43192	7.61216	0.180233	0.120406	0.241862
ENSG00000087088	BAX	581	0.916667	0.917647	3.18426	2.58086	-0.603404	0.00804674	0.0304737
ENSG00000087095	NLK	51701	0.729167	0.882353	0.859147	2.09429	1.23514	0.0034043	0.0153633
ENSG00000087111	PIGS	94005	0.979167	1	6.54411	6.80933	0.265219	0.338023	0.505352
ENSG00000087116	ADAMTS2	9509	0.833333	0.835294	3.01151	2.52944	-0.482075	0.368542	0.536077
ENSG00000087128	TMPRSS11E	28983	0.291667	0.341176	-1.11095	-1.06319	0.0477572	0.71605	0.824167
ENSG00000087152	ATXN7L3	56970	0.583333	0.494118	0.698937	-0.282779	-0.981717	0.0424226	0.112087
ENSG00000087157	PGS1	9489	0.895833	0.988235	4.40405	5.5608	1.15675	0.000730086	0.00438872
ENSG00000087191	PSMC5	5705	1	1	9.19367	9.27768	0.084009	0.769666	0.861037
ENSG00000087206	UIMC1	51720	0.979167	0.988235	5.70132	6.47398	0.772654	7.02579e-06	0.00010112
ENSG00000087245	MMP2	4313	0.958333	0.658824	5.5456	0.981686	-4.56392	1.60292e-12	2.38835e-10
ENSG00000087250	MT3	4504	0.708333	0.729412	0.426593	0.476234	0.0496404	0.738453	0.839814
ENSG00000087253	LPCAT2	54947	0.395833	0.423529	-0.423818	-0.38715	0.036668	0.842065	0.907795
ENSG00000087258	GNAO1	2775	0.5625	0.623529	0.15821	0.772404	0.614194	0.192049	0.339004
ENSG00000087263	OGFOD1	55239	0.979167	0.988235	5.2503	5.84272	0.592423	0.0105275	0.0378722
ENSG00000087266	SH3BP2	6452	0.666667	0.717647	1.27698	1.80416	0.527176	0.454385	0.616976
ENSG00000087269	NOP14	8602	0.9375	0.905882	3.37065	3.50587	0.135227	0.308075	0.473949
ENSG00000087274	ADD1	118	1	1	5.98135	6.08086	0.0995105	0.617814	0.752531
ENSG00000087299	L2HGDH	79944	0.604167	0.588235	0.508621	0.527942	0.0193205	0.945865	0.969819
ENSG00000087301	TXNDC16	57544	0.8125	0.894118	1.75888	2.16171	0.402833	0.377848	0.544948
ENSG00000087302	RTRAF	51637	1	1	8.50357	8.57125	0.0676738	0.483674	0.643469
ENSG00000087303	NID2	22795	0.895833	0.941176	3.63104	3.64915	0.0181073	0.785786	0.871987
ENSG00000087338	GMCL1	64395	0.875	0.964706	2.82723	4.28923	1.46199	6.74264e-05	0.000655793
ENSG00000087365	SF3B2	10992	1	1	8.32319	8.51982	0.196633	0.0108875	0.0388904
ENSG00000087448	KLHL42	57542	0.604167	0.529412	0.512762	0.20479	-0.307972	0.561167	0.70761
ENSG00000087460	GNAS	2778	1	1	9.20774	8.97571	-0.232033	0.0390428	0.105362
ENSG00000087470	DNM1L	10059	0.979167	1	6.2283	6.75251	0.524209	0.00762819	0.029162
ENSG00000087494	PTHLH	5744	0.208333	0.258824	-1.53957	-1.24117	0.298394	0.436572	0.60106
ENSG00000087495	PHACTR3	116154	1	1	7.56851	8.20844	0.639931	9.92074e-09	4.03444e-07
ENSG00000087502	ERGIC2	51290	0.979167	0.988235	5.44905	5.63587	0.186816	0.966367	0.981814
ENSG00000087510	TFAP2C	7022	1	1	5.455	6.40308	0.948075	1.39071e-05	0.000176292
ENSG00000087586	AURKA	6790	1	1	8.55591	9.5262	0.97029	2.28091e-10	1.56462e-08
ENSG00000087589	CASS4	57091	0.229167	0.294118	-1.37178	-0.945701	0.426078	0.354867	0.521822
ENSG00000087842	PIR	8544	0.8125	0.835294	2.24764	2.63062	0.38298	0.470904	0.632115
ENSG00000087884	AAMDC	28971	0.979167	0.976471	3.64826	3.17523	-0.473026	0.0139991	0.0473371
ENSG00000087903	RFX2	5990	0.75	0.776471	1.7235	1.95566	0.232168	0.346898	0.513895
ENSG00000087995	METTL2A	339175	0.8125	0.835294	1.81422	1.90309	0.088871	0.856494	0.917045
ENSG00000088002	SULT2B1	6820	1	0.988235	3.87086	4.27883	0.407961	0.0278353	0.0813042
ENSG00000088035	ALG6	29929	0.75	0.870588	2.16179	3.36238	1.20059	0.0207043	0.0646018
ENSG00000088038	CNOT3	4849	1	1	6.71839	7.43185	0.713464	3.01966e-05	0.000338836
ENSG00000088179	PTPN4	5775	0.833333	0.705882	2.4357	1.4255	-1.0102	0.0503573	0.126962
ENSG00000088205	DDX18	8886	1	1	5.98143	6.17903	0.19761	0.126104	0.250335
ENSG00000088247	KHSRP	8570	1	1	4.52505	5.0637	0.538646	0.0587057	0.142268
ENSG00000088256	GNA11	2767	0.895833	0.952941	3.55598	4.70708	1.1511	0.000109711	0.000964849
ENSG00000088280	ASAP3	55616	0.729167	0.576471	1.60928	0.850624	-0.758653	0.180683	0.324486
ENSG00000088298	EDEM2	55741111089941	0.9375	0.964706	4.31932	4.26025	-0.0590612	0.368356	0.535892
ENSG00000088305	DNMT3B	1789	0.8125	0.929412	2.40841	3.91582	1.50742	0.000117413	0.00101829
ENSG00000088320	REM1	28954	0.291667	0.376471	-1.19758	-0.759816	0.437766	0.27799	0.44095
ENSG00000088325	TPX2	22974	1	1	5.69821	6.78656	1.08835	5.79559e-10	3.45417e-08
ENSG00000088340	FER1L4	.	0.479167	0.482353	-0.194007	-0.347514	-0.153507	0.810397	0.886967
ENSG00000088356	PDRG1	81572	1	1	7.32669	7.41131	0.0846273	0.31268	0.478644
ENSG00000088367	EPB41L1	2036	0.75	0.717647	1.37714	1.50179	0.124647	0.855437	0.91656
ENSG00000088386	SLC15A1	6564	0.958333	0.941176	3.70615	4.24797	0.541826	0.052699	0.131036
ENSG00000088387	DOCK9	23348	0.75	0.811765	1.60614	2.41415	0.808017	0.0897227	0.196149
ENSG00000088448	ANKRD10	55608	1	1	6.35849	6.60654	0.248055	0.0746455	0.170623
ENSG00000088451	TGDS	23483	0.708333	0.788235	1.65981	2.30223	0.642421	0.13051	0.25678
ENSG00000088538	DOCK3	1795	0.875	0.8	2.5857	2.14493	-0.440774	0.494334	0.652673
ENSG00000088543	C3orf18	51161	0.666667	0.682353	1.5103	1.38271	-0.127587	0.740456	0.841198
ENSG00000088682	COQ9	57017	1	0.988235	5.99176	6.05191	0.0601585	0.326344	0.492505
ENSG00000088726	TMEM40	55287	0.25	0.258824	-1.29381	-1.247	0.0468157	0.909976	0.948809
ENSG00000088727	KIF9	64147	0.958333	0.964706	3.49682	4.11848	0.621653	0.00773367	0.0294967
ENSG00000088756	ARHGAP28	79822	0.5625	0.317647	0.35192	-1.05052	-1.40244	0.00124845	0.0067947
ENSG00000088766	CRLS1	54675	1	1	5.20563	5.57474	0.369115	0.0101783	0.03682
ENSG00000088808	PPP1R13B	23368	0.979167	1	5.76511	6.49731	0.732208	0.000422763	0.00281914
ENSG00000088812	ATRN	8455	1	0.988235	5.68361	5.61917	-0.0644413	0.897487	0.941457
ENSG00000088826	SMOX	54498	0.854167	0.929412	3.82586	4.57228	0.746413	0.259632	0.4201
ENSG00000088832	FKBP1A	2280	1	1	7.95182	8.04988	0.0980569	0.26184	0.42241
ENSG00000088833	NSFL1C	55968	1	1	8.49051	8.65992	0.169408	0.00817697	0.030832
ENSG00000088836	SLC4A11	83959	0.541667	0.717647	1.1772	2.40723	1.23003	0.0584302	0.141903
ENSG00000088854	C20orf194	25943	0.708333	0.752941	1.44328	1.85992	0.41664	0.578507	0.720379
ENSG00000088876	ZNF343	79175	0.875	0.8	3.02492	2.30483	-0.720093	0.156722	0.293596
ENSG00000088881	EBF4	57593	0.666667	0.305882	1.12409	-0.820111	-1.9442	0.00012312	0.00105579
ENSG00000088882	CPXM1	56265	0.75	0.341176	2.18061	-0.911945	-3.09255	5.5262e-08	1.77797e-06
ENSG00000088888	MAVS	57506	0.770833	0.741176	2.27819	1.52523	-0.752958	0.177694	0.32115
ENSG00000088899	LZTS3	9762	0.541667	0.305882	0.224234	-0.912613	-1.13685	0.0106729	0.0382894
ENSG00000088930	XRN2	22803	1	1	5.71216	5.98168	0.269525	0.021035	0.0652852
ENSG00000088970	KIZ	55857	1	0.988235	5.99925	5.96128	-0.0379667	0.97197	0.984371
ENSG00000088986	DYNLL1	8655	1	1	7.23827	7.19467	-0.0435948	0.678419	0.797433
ENSG00000088992	TESC	54997	1	1	7.24218	7.87989	0.637706	1.79396e-05	0.000218863
ENSG00000089006	SNX5	27131	1	1	7.41214	7.92928	0.517147	3.85097e-07	8.99972e-06
ENSG00000089009	RPL6	6128	1	1	9.83934	9.13275	-0.706588	3.83012e-09	1.76263e-07
ENSG00000089022	MAPKAPK5	8550	0.9375	0.964706	3.98958	3.94691	-0.0426684	0.642767	0.770591
ENSG00000089041	P2RX7	5027	0.0833333	0.0352941	-1.86931	-2.18785	-0.318537	0.223689	0.377971
ENSG00000089048	ESF1	51575	0.979167	1	5.5553	5.64832	0.0930112	0.681853	0.799505
ENSG00000089050	RBBP9	10741	0.479167	0.447059	-0.483795	-0.45382	0.0299751	0.894354	0.939418
ENSG00000089053	ANAPC5	51433	1	0.988235	6.93779	7.05054	0.112744	0.787632	0.872801
ENSG00000089057	SLC23A2	9962	0.729167	0.388235	1.5535	-0.593001	-2.1465	3.2541e-05	0.00036025
ENSG00000089060	SLC8B1	80024	0.770833	0.541176	1.97497	0.323377	-1.65159	0.00102509	0.00581042
ENSG00000089063	TMEM230	29058	1	1	7.95783	7.96245	0.004626	0.403003	0.568773
ENSG00000089091	DZANK1	55184	0.708333	0.870588	1.64268	2.70737	1.06469	0.0420518	0.111301
ENSG00000089094	KDM2B	84678	0.958333	0.988235	4.37208	5.18195	0.809874	0.0099059	0.0360947
ENSG00000089101	CFAP61	26074	0.604167	0.811765	0.325137	1.58358	1.25844	0.00296161	0.0137548
ENSG00000089123	TASP1	55617	0.833333	0.8	2.59737	2.73371	0.136335	0.505965	0.661971
ENSG00000089127	OAS1	4938	0.4375	0.0823529	-0.343263	-1.90683	-1.56357	2.91105e-06	4.95943e-05
ENSG00000089154	GCN1	10985	0.854167	0.905882	3.59274	3.94643	0.35369	0.480441	0.641175
ENSG00000089157	RPLP0	6175	1	1	11.3457	10.5742	-0.771514	1.07885e-11	1.1402e-09
ENSG00000089159	PXN	5829	0.625	0.741176	1.15362	2.05455	0.900925	0.0894841	0.195731
ENSG00000089163	SIRT4	23409	0.166667	0.152941	-1.80766	-1.67903	0.128629	0.979389	0.988415
ENSG00000089169	RPH3A	22895	0.458333	0.588235	-0.141218	0.477417	0.618634	0.224393	0.378809
ENSG00000089177	KIF16B	55614	0.75	0.741176	2.26577	2.07477	-0.190997	0.503796	0.660519
ENSG00000089195	TRMT6	51605	1	1	6.11629	6.76863	0.652346	0.000353859	0.00244952
ENSG00000089199	CHGB	1114	0.25	0.0941176	-1.18196	-1.97986	-0.797903	0.0130494	0.0449011
ENSG00000089220	PEBP1	5037	1	1	8.55753	8.23749	-0.320042	0.00010381	0.000926392
ENSG00000089225	TBX5	6910	0.854167	0.988235	3.17268	4.97127	1.7986	5.25621e-06	8.02246e-05
ENSG00000089234	BRAP	8315	1	1	7.48322	8.05023	0.567009	0.000453682	0.00297942
ENSG00000089248	ERP29	10961	1	1	7.95643	8.03837	0.0819394	0.70259	0.813997
ENSG00000089250	NOS1	4842	0.270833	0.305882	-1.23404	-1.08719	0.146856	0.683479	0.800895
ENSG00000089280	FUS	2521	1	1	9.56912	9.58857	0.0194533	0.827545	0.897881
ENSG00000089289	IGBP1	3476	1	1	8.00469	8.05078	0.0460951	0.94957	0.971766
ENSG00000089327	FXYD5	53827	0.5	0.105882	0.298038	-1.879	-2.17704	1.75117e-07	4.6744e-06
ENSG00000089335	ZNF302	55900	0.979167	0.952941	3.80645	4.12998	0.323534	0.164792	0.304791
ENSG00000089351	GRAMD1A	57655	0.9375	0.8	3.98225	2.88415	-1.09811	0.018018	0.0579498
ENSG00000089472	HEPH	9843	0.416667	0.117647	-0.5797	-1.79191	-1.21221	0.000127346	0.00108173
ENSG00000089486	CDIP1	29965	1	0.988235	6.48532	6.80701	0.321692	0.135655	0.264189
ENSG00000089597	GANAB	23193	0.979167	1	5.26618	5.2087	-0.0574859	0.553415	0.70168
ENSG00000089639	GMIP	51291	0.25	0.247059	-1.23299	-1.18868	0.0443074	0.928614	0.960385
ENSG00000089682	RBM41	55285	0.604167	0.588235	0.608388	0.425436	-0.182952	0.627672	0.76004
ENSG00000089685	BIRC5	332	1	1	7.3968	7.45383	0.0570283	0.97197	0.984371
ENSG00000089692	LAG3	3902	0.333333	0.0941176	-0.602184	-1.83926	-1.23708	0.000710752	0.0042938
ENSG00000089693	MLF2	8079	1	1	7.6604	7.49785	-0.162543	0.06525	0.153901
ENSG00000089737	DDX24	57062	1	1	7.45727	7.76389	0.30662	0.0876963	0.192809
ENSG00000089775	ZBTB25	7597	0.666667	0.552941	0.338595	-0.085374	-0.423969	0.300442	0.466067
ENSG00000089818	NECAP1	25977	0.979167	1	6.30372	7.31806	1.01434	9.85719e-06	0.000132827
ENSG00000089820	ARHGAP4	393	0.333333	0.176471	-0.693068	-1.64713	-0.954065	0.0258165	0.0768954
ENSG00000089847	ANKRD24	170961	0.9375	0.952941	4.29208	4.20901	-0.0830658	0.70257	0.813997
ENSG00000089876	DHX32	55760	0.583333	0.752941	0.543478	1.33958	0.796104	0.0813774	0.182043
ENSG00000089902	RCOR1	23186	0.916667	0.941176	3.29914	3.81043	0.511299	0.157732	0.294833
ENSG00000089916	GPATCH2L	55668	0.666667	0.447059	0.84209	-0.227183	-1.06927	0.0297754	0.085559
ENSG00000090006	LTBP4	8425	0.979167	0.941176	5.56888	3.96897	-1.59991	3.99559e-08	1.33514e-06
ENSG00000090013	BLVRB	645	0.875	0.764706	2.94979	1.33702	-1.61277	8.36517e-05	0.000780303
ENSG00000090020	SLC9A1	6548	0.833333	0.917647	3.39958	4.01185	0.612269	0.0974536	0.208217
ENSG00000090054	SPTLC1	10558	1	1	5.26293	5.35746	0.094522	0.776838	0.865545
ENSG00000090060	PAPOLA	10914	1	1	7.17842	7.34678	0.168367	0.0472457	0.121236
ENSG00000090061	CCNK	8812	1	1	7.45754	7.63896	0.181423	0.319464	0.485723
ENSG00000090097	PCBP4	57060	0.5625	0.317647	0.701536	-0.965764	-1.6673	0.000962218	0.0055228
ENSG00000090238	YPEL3	83719	1	1	6.19596	6.34965	0.153692	0.103518	0.216742
ENSG00000090263	MRPS33	51650	1	1	5.00976	4.6878	-0.321965	0.0019719	0.00985029
ENSG00000090266	NDUFB2	4708	1	1	6.13351	6.00192	-0.131595	0.27398	0.436275
ENSG00000090273	NUDC	10726	1	1	8.20116	8.03709	-0.164072	0.0826016	0.184124
ENSG00000090316	MAEA	10296	1	1	6.62648	6.68931	0.0628341	0.0694576	0.161252
ENSG00000090339	ICAM1	3383	0.979167	0.976471	5.01822	6.28781	1.26959	9.60857e-05	0.000870783
ENSG00000090372	STRN4	29888	0.916667	0.917647	3.89545	3.79332	-0.102135	0.249944	0.409536
ENSG00000090376	IRAK3	11213	0.0625	0.117647	-1.95498	-1.92592	0.0290615	0.353722	0.520518
ENSG00000090432	MUL1	79594	0.979167	0.952941	5.09951	5.46445	0.36494	0.0876882	0.192809
ENSG00000090447	TFAP4	7023	0.791667	0.858824	2.10566	2.53526	0.429598	0.471048	0.632168
ENSG00000090470	PDCD7	10081	0.958333	0.976471	5.11153	5.13138	0.0198442	0.544041	0.69427
ENSG00000090487	SPG21	51324	1	1	8.21276	8.54503	0.332278	3.78143e-05	0.000407375
ENSG00000090520	DNAJB11	51726	1	1	6.33146	6.78366	0.452193	0.000453682	0.00297942
ENSG00000090530	P3H2	55214	0.854167	0.717647	2.64634	1.6468	-0.999547	0.0468857	0.120721
ENSG00000090539	CHRD	8646	0.375	0.0823529	-0.130611	-1.99079	-1.86018	1.66009e-05	0.000204729
ENSG00000090554	FLT3LG	2323	0.541667	0.576471	0.279894	-0.151654	-0.431548	0.366734	0.534425
ENSG00000090565	RAB11FIP3	9727	0.291667	0.223529	-1.24551	-1.73616	-0.490651	0.224714	0.37928
ENSG00000090581	GNPTG	84572	0.979167	0.976471	5.83397	5.81929	-0.0146778	0.654573	0.779997
ENSG00000090612	ZNF268	10795	0.666667	0.623529	1.14011	0.576336	-0.56377	0.30782	0.473797
ENSG00000090615	GOLGA3	2802	0.979167	1	4.55238	4.6624	0.110012	0.585203	0.725517
ENSG00000090621	PABPC4	8761	1	1	7.01052	7.31123	0.300702	0.0625635	0.14919
ENSG00000090661	CERS4	79603	0.979167	0.988235	5.30984	5.87575	0.565912	0.0350097	0.0970725
ENSG00000090674	MCOLN1	57192	0.958333	0.952941	5.10394	5.76625	0.662306	0.000393584	0.00267321
ENSG00000090686	USP48	84196	0.958333	0.988235	4.70291	5.11402	0.411104	0.0599677	0.144386
ENSG00000090776	EFNB1	1947	0.708333	0.752941	1.98542	2.19388	0.208459	0.644797	0.772142
ENSG00000090857	PDPR	55066	0.854167	0.894118	2.25288	3.08927	0.83639	0.0432817	0.113614
ENSG00000090861	AARS	16	1	1	6.77955	6.89496	0.115406	0.0666286	0.156444
ENSG00000090863	GLG1	2734	0.979167	0.976471	6.2514	5.29963	-0.951775	5.69438e-06	8.54862e-05
ENSG00000090889	KIF4A	24137	0.9375	0.976471	3.46947	4.86921	1.39974	1.16915e-06	2.32018e-05
ENSG00000090905	TNRC6A	27327	0.979167	0.941176	3.70378	3.96208	0.258295	0.0781314	0.176651
ENSG00000090924	PLEKHG2	64857	0.416667	0.0470588	-0.215338	-2.08249	-1.86715	1.45613e-07	3.98985e-06
ENSG00000090932	DLL3	10683	1	1	5.26259	5.35198	0.0893899	0.27811	0.44095
ENSG00000090971	NAT14	57106	0.791667	0.823529	2.31809	2.66944	0.351346	0.626604	0.759564
ENSG00000090975	PITPNM2	57605	0.375	0.305882	-0.522167	-1.02434	-0.502177	0.306941	0.472632
ENSG00000090989	EXOC1	55763	0.958333	0.988235	4.02847	5.11054	1.08207	0.000121021	0.0010422
ENSG00000091009	RBM27	54439	1	0.964706	4.33717	4.44644	0.109262	0.550281	0.699201
ENSG00000091039	OSBPL8	114882	1	1	5.551	5.87314	0.322137	0.0249766	0.0748844
ENSG00000091073	DTX2	113878	0.979167	1	6.70138	7.53392	0.832546	1.82717e-06	3.37543e-05
ENSG00000091127	PUS7	54517	0.875	0.941176	2.76134	3.40982	0.64848	0.0644946	0.152732
ENSG00000091128	LAMB4	22798	0.541667	0.729412	0.592569	1.67138	1.07881	0.0550442	0.135406
ENSG00000091129	NRCAM	4897	1	0.952941	4.2127	4.02042	-0.192283	0.699114	0.811582
ENSG00000091136	LAMB1	3912	0.979167	1	5.52329	5.78791	0.26462	0.410955	0.577049
ENSG00000091140	DLD	1738	1	1	6.36208	6.85507	0.492994	0.0408553	0.108784
ENSG00000091157	WDR7	23335	1	0.988235	6.00491	6.98735	0.982437	2.72123e-09	1.29833e-07
ENSG00000091164	TXNL1	9352	1	1	7.05256	7.10723	0.0546635	0.998131	0.999506
ENSG00000091181	IL5RA	3568	0.208333	0.188235	-1.60732	-1.54572	0.0615973	0.889667	0.937254
ENSG00000091262	ABCC6	368	0.5625	0.705882	0.210086	1.23297	1.02289	0.0280703	0.0818909
ENSG00000091317	CMTM6	54918	1	0.988235	5.45223	5.78676	0.334527	0.0139996	0.0473371
ENSG00000091409	ITGA6	3655	1	1	5.79394	6.09971	0.305772	0.0939574	0.202877
ENSG00000091428	RAPGEF4	11069	0.25	0.235294	-1.29675	-1.41481	-0.118055	0.790562	0.87483
ENSG00000091436	MAP3K20	51776	1	0.988235	6.42158	6.00803	-0.413553	0.0281697	0.0820623
ENSG00000091483	FH	2271	1	1	7.34209	7.63145	0.28936	0.0084062	0.0315133
ENSG00000091527	CDV3	55573	1	1	5.56464	5.6726	0.107956	0.102529	0.215577
ENSG00000091536	MYO15A	51168	0.333333	0.211765	-0.947455	-1.5636	-0.616143	0.0970427	0.207534
ENSG00000091542	ALKBH5	54890	1	1	8.18019	8.97681	0.79662	3.48888e-07	8.30115e-06
ENSG00000091592	NLRP1	22861	0.291667	0.305882	-0.967552	-1.15396	-0.186408	0.851121	0.914077
ENSG00000091622	PITPNM3	83394	0.479167	0.376471	-0.0139744	-0.803695	-0.789721	0.116926	0.236874
ENSG00000091640	SPAG7	9552	1	0.988235	6.3572	5.86829	-0.488911	0.000688115	0.00418346
ENSG00000091651	ORC6	23594	0.958333	1	5.36607	5.95656	0.590487	0.00338459	0.0152897
ENSG00000091656	ZFHX4	79776	0.104167	0.0352941	-1.95852	-2.19887	-0.240345	0.107687	0.223004
ENSG00000091704	CPA1	1357	0.8125	0.929412	3.08044	4.2895	1.20905	0.0234019	0.0712169
ENSG00000091732	ZC3HC1	51530	1	0.952941	5.09785	5.18553	0.0876849	0.224073	0.378454
ENSG00000091831	ESR1	2099	0.333333	0.270588	-0.681291	-1.36147	-0.680181	0.207302	0.35826
ENSG00000091844	RGS17	26575	0.208333	0.2	-1.55859	-1.60681	-0.0482252	0.917691	0.953574
ENSG00000091879	ANGPT2	285	0.270833	0.317647	-1.31	-1.19654	0.113457	0.63788	0.767449
ENSG00000091947	TMEM101	84336	0.958333	1	5.2566	5.45936	0.202761	0.077749	0.176028
ENSG00000091972	CD200	4345	0.354167	0.129412	-0.515805	-1.77392	-1.25811	0.00151559	0.00798331
ENSG00000091986	CCDC80	151887	0.8125	0.247059	2.47295	-1.44678	-3.91974	6.62569e-13	1.2813e-10
ENSG00000092010	PSME1	5720	1	0.988235	6.50712	5.49792	-1.0092	6.43745e-11	5.31909e-09
ENSG00000092020	PPP2R3C	55012	1	1	6.77765	6.90633	0.128684	0.196803	0.345217
ENSG00000092036	HAUS4	54930	1	1	7.57668	7.85033	0.273652	0.0288489	0.0834657
ENSG00000092051	JPH4	84502	0.479167	0.176471	0.261552	-1.56111	-1.82266	5.34268e-05	0.000539851
ENSG00000092054	MYH7	4625	0.0208333	0.152941	-2.21335	-1.58869	0.624665	0.018197	0.0583394
ENSG00000092068	SLC7A8	23428	1	1	7.92359	8.639	0.715412	1.23663e-08	4.81617e-07
ENSG00000092094	OSGEP	55644	0.8125	0.611765	2.44014	0.738321	-1.70182	0.000419452	0.0028053
ENSG00000092096	SLC22A17	51310	0.6875	0.247059	1.77844	-1.29466	-3.07311	2.36345e-08	8.35851e-07
ENSG00000092098	RNF31	55072	0.854167	0.894118	3.39446	4.03123	0.63677	0.0306449	0.0874511
ENSG00000092108	SCFD1	23256	1	1	6.71412	7.25515	0.541023	0.000461735	0.00302684
ENSG00000092140	G2E3	55632	0.854167	0.894118	2.73155	3.2835	0.551949	0.147361	0.281024
ENSG00000092148	HECTD1	25831	0.979167	0.964706	4.66294	4.72238	0.0594452	0.380974	0.547718
ENSG00000092199	HNRNPC	3183	1	1	9.06861	9.3425	0.273893	0.000160809	0.00130616
ENSG00000092200	RPGRIP1	57096	0.104167	0.305882	-1.9176	-0.979744	0.937852	0.00762068	0.0291517
ENSG00000092201	SUPT16H	11198	1	1	5.58333	5.76376	0.180431	0.242442	0.400465
ENSG00000092203	TOX4	9878	1	1	7.1146	7.55418	0.439584	0.00626293	0.0249699
ENSG00000092208	GEMIN2	8487	1	0.988235	5.32166	5.46952	0.147854	0.916049	0.952301
ENSG00000092330	TINF2	26277	0.979167	0.988235	5.55807	6.11961	0.561536	0.00508461	0.0210975
ENSG00000092345	DAZL	1618	1	1	5.61046	6.86812	1.25765	7.25647e-07	1.54278e-05
ENSG00000092421	SEMA6A	57556	0.75	0.776471	1.64119	1.92392	0.282724	0.501664	0.658863
ENSG00000092439	TRPM7	54822	0.729167	0.8	1.69446	2.23495	0.540488	0.276379	0.438818
ENSG00000092445	TYRO3	7301	0.979167	0.8	4.75369	2.63253	-2.12116	5.01562e-06	7.73316e-05
ENSG00000092470	WDR76	79968	1	1	5.94101	6.66033	0.719316	3.93823e-05	0.000422106
ENSG00000092529	CAPN3	825	0.9375	0.952941	4.56308	4.66831	0.105231	0.912326	0.949795
ENSG00000092531	SNAP23	8773	1	1	5.20744	5.65776	0.450317	0.0344069	0.0956929
ENSG00000092621	PHGDH	26227	0.8125	0.435294	2.79749	-0.364268	-3.16176	1.52518e-07	4.1504e-06
ENSG00000092758	COL9A3	1299	0.958333	0.941176	4.22259	4.61845	0.395865	0.181008	0.324805
ENSG00000092820	EZR	7430	1	1	10.1861	10.9625	0.776412	6.6099e-12	7.60474e-10
ENSG00000092841	MYL6	4637	1	1	7.3887	5.05895	-2.32975	5.78253e-18	3.50383e-14
ENSG00000092847	AGO1	26523	0.979167	0.964706	4.36746	4.29016	-0.0772964	0.985048	0.991924
ENSG00000092853	CLSPN	63967	0.979167	1	5.46881	5.82736	0.358557	0.0223757	0.0685217
ENSG00000092871	RFFL	117584	0.9375	0.929412	3.10796	3.85966	0.751698	0.00574096	0.0232945
ENSG00000092929	UNC13D	201294	0.958333	0.988235	5.11844	6.00407	0.885626	0.000964823	0.00552951
ENSG00000092931	MFSD11	79157	0.9375	0.882353	2.86421	3.14496	0.280755	0.161778	0.300449
ENSG00000092964	DPYSL2	1808	0.979167	0.870588	4.62539	3.24455	-1.38085	5.45457e-05	0.000547808
ENSG00000092969	TGFB2	7042	0.1875	0.0235294	-1.62427	-2.1854	-0.561131	0.00129543	0.00700425
ENSG00000092978	GPATCH2	55105	0.708333	0.741176	1.15694	1.34713	0.190195	0.601045	0.738776
ENSG00000093000	NUP50	10762	1	1	5.50384	6.13219	0.62835	1.5144e-05	0.000189332
ENSG00000093009	CDC45	8318	0.979167	0.988235	5.19422	6.00948	0.815263	4.58285e-05	0.000476858
ENSG00000093010	COMT	1312	1	0.635294	5.2099	0.821142	-4.38876	7.69244e-14	2.08706e-11
ENSG00000093072	ADA2	51816	0.354167	0.0470588	-0.521647	-2.13662	-1.61497	2.97633e-06	5.0329e-05
ENSG00000093100	AC016026.1	.	0.416667	0.188235	-0.00841487	-1.49037	-1.48195	0.00142882	0.00760558
ENSG00000093144	ECHDC1	55862	0.979167	1	5.28952	5.48798	0.198456	0.820251	0.893649
ENSG00000093167	LRRFIP2	9209	1	1	5.97458	6.28251	0.307929	0.119291	0.24046
ENSG00000093183	SEC22C	9117	0.9375	0.952941	3.9837	4.44645	0.462752	0.0948568	0.204278
ENSG00000093217	XYLB	9942	0.395833	0.317647	-0.507831	-0.984451	-0.47662	0.251971	0.411373
ENSG00000094631	HDAC6	10013	0.875	0.835294	2.8108	3.03858	0.227785	0.429083	0.594076
ENSG00000094755	GABRP	2568	0.8125	0.894118	2.34075	3.31181	0.971061	0.0134343	0.0459904
ENSG00000094796	KRT31	3881	0.770833	0.811765	1.44896	1.2758	-0.17316	0.408991	0.575035
ENSG00000094804	CDC6	990	1	1	6.46066	7.2541	0.79344	2.57554e-10	1.72063e-08
ENSG00000094841	UPRT	139596	0.770833	0.835294	1.89705	2.6513	0.754257	0.126006	0.250335
ENSG00000094880	CDC23	8697	0.979167	0.988235	5.10639	5.76882	0.66243	6.9627e-05	0.000672876
ENSG00000094914	AAAS	8086	1	1	7.49228	7.60096	0.108681	0.762514	0.856091
ENSG00000094916	CBX5	23468	1	0.988235	4.74818	4.16738	-0.580798	0.0155293	0.0513724
ENSG00000094975	SUCO	51430	0.8125	0.858824	2.33132	2.39853	0.0672085	0.633745	0.76463
ENSG00000095002	MSH2	4436	0.958333	0.988235	4.49047	5.64818	1.15771	1.09818e-05	0.000144567
ENSG00000095015	MAP3K1	4214	0.75	0.8	1.21803	1.66728	0.449251	0.323826	0.489971
ENSG00000095059	DHPS	1725	0.979167	0.988235	5.81812	5.14174	-0.676385	0.000376676	0.00257843
ENSG00000095066	HOOK2	29911	0.895833	0.882353	3.10912	2.97037	-0.138753	0.867814	0.924459
ENSG00000095139	ARCN1	372	1	1	5.71011	6.06996	0.359851	0.0477703	0.122091
ENSG00000095203	EPB41L4B	54566	0.729167	0.823529	1.73336	2.62639	0.893029	0.0623274	0.148784
ENSG00000095209	TMEM38B	55151	0.645833	0.764706	0.900929	1.31263	0.411702	0.51796	0.67239
ENSG00000095261	PSMD5	5711	0.916667	1	3.25681	4.55102	1.29421	3.08166e-05	0.000344385
ENSG00000095303	PTGS1	5742	0.3125	0.435294	-1.08879	-0.00322744	1.08556	0.0503646	0.126963
ENSG00000095319	NUP188	23511	0.916667	0.941176	3.73397	4.0279	0.293935	0.562802	0.708862
ENSG00000095321	CRAT	1384	0.895833	0.835294	3.97211	3.74865	-0.223461	0.78012	0.868271
ENSG00000095370	SH2D3C	10044	0.145833	0.105882	-1.66977	-1.90439	-0.23462	0.473223	0.634244
ENSG00000095380	NANS	54187	1	1	6.73024	6.63877	-0.0914692	0.744722	0.843935
ENSG00000095383	TBC1D2	55357	0.958333	1	4.52675	6.17021	1.64346	5.95324e-06	8.82716e-05
ENSG00000095397	WHRN	25861	0.979167	0.988235	4.73765	5.51361	0.775959	0.00420275	0.0182029
ENSG00000095464	PDE6C	5146	0.416667	0.694118	-0.296903	1.69029	1.98719	0.000179199	0.00142434
ENSG00000095485	CWF19L1	55280	0.9375	0.976471	3.52321	4.28961	0.766403	0.182561	0.326813
ENSG00000095539	SEMA4G	57715	0.416667	0.411765	-0.133816	-0.664438	-0.530622	0.4677	0.629534
ENSG00000095564	BTAF1	9044	0.75	0.635294	1.51891	0.371399	-1.14751	0.0155704	0.051499
ENSG00000095574	IKZF5	64376	0.875	0.941176	2.38479	3.4988	1.11401	0.00422326	0.0182787
ENSG00000095587	TLL2	7093	0.458333	0.541176	-0.250209	0.235216	0.485425	0.319986	0.486387
ENSG00000095596	CYP26A1	1592	0.0833333	0.0823529	-1.94816	-1.90239	0.0457705	0.996087	0.998672
ENSG00000095627	TDRD1	56165	0.958333	1	4.72717	5.74019	1.01302	9.4249e-05	0.000857075
ENSG00000095637	SORBS1	10580	0.791667	0.941176	1.74075	3.14132	1.40057	0.00114855	0.00636338
ENSG00000095713	CRTAC1	55118	0.208333	0.282353	-1.39059	-1.21818	0.172412	0.432236	0.59687
ENSG00000095739	BAMBI	25805	0.8125	0.729412	2.95833	1.83027	-1.12806	0.0176387	0.0569273
ENSG00000095777	MYO3A	53904	0.604167	0.741176	0.555004	1.09973	0.544722	0.305492	0.471339
ENSG00000095787	WAC	51322	1	1	6.03444	6.56379	0.529347	0.000486701	0.00316199
ENSG00000095794	CREM	1390	1	1	6.78954	6.91686	0.127328	0.463436	0.625183
ENSG00000095906	NUBP2	10101	1	0.988235	6.26782	5.67874	-0.589073	0.00044576	0.00293694
ENSG00000095932	SMIM24	284422	0.25	0.411765	-1.43069	-0.303799	1.12689	0.0128725	0.044393
ENSG00000095951	HIVEP1	3096	0.916667	0.905882	3.24229	3.11964	-0.122655	0.76243	0.856091
ENSG00000095981	KCNK16	83795	0.333333	0.329412	-1.05865	-0.937079	0.121566	0.873238	0.927474
ENSG00000096060	FKBP5	2289	0.979167	0.941176	4.11346	4.08993	-0.0235357	0.690452	0.805759
ENSG00000096063	SRPK1	6732	1	1	5.7367	6.09328	0.356576	0.0051217	0.0212271
ENSG00000096070	BRPF3	27154	0.5	0.388235	0.00386675	-0.523291	-0.527158	0.186164	0.331579
ENSG00000096080	MRPS18A	55168	1	1	6.74656	6.68975	-0.056808	0.513398	0.667993
ENSG00000096092	TMEM14A	28978	1	1	6.47809	7.19088	0.712797	1.7639e-08	6.49073e-07
ENSG00000096093	EFHC1	114327	0.833333	0.658824	2.88215	1.19359	-1.68856	0.00184532	0.00934119
ENSG00000096384	HSP90AB1	3326	1	1	11.1415	11.4595	0.318076	0.014369	0.0483738
ENSG00000096401	CDC5L	988	1	0.988235	4.42203	4.87713	0.455097	0.0488343	0.124105
ENSG00000096433	ITPR3	3710	0.958333	0.988235	4.98236	6.74244	1.76008	2.705e-06	4.65639e-05
ENSG00000096654	ZNF184	7738	0.625	0.8	0.826703	2.28057	1.45387	0.0014267	0.00759655
ENSG00000096696	DSP	1832	0.520833	0.4	0.625175	-0.403809	-1.02898	0.0623135	0.14877
ENSG00000096717	SIRT1	23411	0.708333	0.870588	1.12289	1.83704	0.714144	0.184205	0.32896
ENSG00000096746	HNRNPH3	3189	1	1	7.21216	7.54977	0.337611	0.144463	0.27695
ENSG00000096872	IFT74	80173	0.9375	0.941176	3.41851	3.52957	0.111061	0.502842	0.659785
ENSG00000096968	JAK2	3717	0.666667	0.8	0.825879	1.64128	0.815401	0.100881	0.213432
ENSG00000097007	ABL1	25	0.75	0.823529	2.23582	2.27088	0.0350565	0.467304	0.629267
ENSG00000097021	ACOT7	11332	1	1	6.65387	7.14132	0.487451	0.00150314	0.00792691
ENSG00000097033	SH3GLB1	51100	1	1	8.31772	8.62603	0.308302	0.0022712	0.0110954
ENSG00000097046	CDC7	8317	0.9375	0.976471	3.40454	4.30328	0.898735	0.0122733	0.0427479
ENSG00000097096	SYDE2	84144	0.416667	0.4	-0.818069	-1.12126	-0.303187	0.618506	0.753011
ENSG00000099139	PCSK5	5125	0.958333	0.964706	4.73673	5.30436	0.567632	0.0040491	0.017672
ENSG00000099194	SCD	6319	0.8125	0.6	2.51113	0.552642	-1.95849	9.38836e-05	0.000856735
ENSG00000099203	TMED1	11018	0.958333	0.952941	5.51836	4.7195	-0.798861	0.000300781	0.0021408
ENSG00000099204	ABLIM1	3983	0.979167	0.988235	5.83969	5.75059	-0.0891036	0.383531	0.55022
ENSG00000099219	ERMP1	79956	0.895833	0.976471	3.629	4.22669	0.597692	0.233099	0.389511
ENSG00000099246	RAB18	22931	1	1	5.93775	6.59628	0.65853	8.55273e-05	0.000793222
ENSG00000099250	NRP1	8829	0.75	0.176471	1.38279	-1.74117	-3.12396	3.87547e-12	4.89224e-10
ENSG00000099251	HSD17B7P2	.	0.541667	0.505882	-0.126302	-0.0587212	0.0675808	0.946506	0.970313
ENSG00000099256	PRTFDC1	56952	0.479167	0.117647	-0.170859	-1.88653	-1.71567	2.02092e-06	3.65536e-05
ENSG00000099260	PALMD	54873	0.291667	0.0588235	-0.77223	-2.11869	-1.34646	0.000136208	0.00114417
ENSG00000099282	TSPAN15	23555	0.979167	0.988235	5.53279	6.5175	0.984707	2.07586e-06	3.72876e-05
ENSG00000099284	H2AFY2	55506	0.895833	0.976471	3.81584	4.35752	0.541674	0.537816	0.689339
ENSG00000099290	WASHC2A	387680	1	0.976471	4.97205	5.20344	0.231389	0.240559	0.398296
ENSG00000099308	MAST3	23031	0.8125	0.894118	2.69629	3.67539	0.979102	0.0246473	0.0741527
ENSG00000099326	MZF1	7593	0.625	0.423529	1.10276	-0.342986	-1.44574	0.00722349	0.0279439
ENSG00000099330	OCEL1	79629	0.958333	0.917647	4.42468	4.19744	-0.22724	0.990654	0.995254
ENSG00000099331	MYO9B	4650	0.645833	0.647059	1.1676	1.29627	0.128675	0.994265	0.997576
ENSG00000099337	KCNK6	9424	0.416667	0.0352941	-0.585573	-2.21165	-1.62608	2.16073e-08	7.71666e-07
ENSG00000099338	CATSPERG	57828	0.770833	0.847059	1.86826	2.51313	0.644875	0.185152	0.330261
ENSG00000099341	PSMD8	5714	1	1	8.14992	7.90018	-0.249748	0.00343602	0.0154795
ENSG00000099364	FBXL19	54620	0.645833	0.776471	0.714673	1.64583	0.931153	0.0313101	0.0889272
ENSG00000099377	HSD3B7	80270	0.3125	0.0941176	-0.841408	-1.83093	-0.989521	0.00251547	0.0120682
ENSG00000099381	SETD1A	9739	0.645833	0.647059	1.50732	1.31479	-0.19253	0.491684	0.650256
ENSG00000099385	BCL7C	9274	0.895833	0.635294	2.57346	0.36933	-2.20413	4.32899e-07	9.99274e-06
ENSG00000099399	MAGEB2	4113	0.979167	1	6.71206	6.89283	0.180774	0.908618	0.947828
ENSG00000099617	EFNA2	1943	0.354167	0.447059	-0.913363	-0.348003	0.565361	0.212047	0.363538
ENSG00000099622	CIRBP	1153	1	1	8.94792	8.6604	-0.287528	0.004975	0.0207421
ENSG00000099624	ATP5F1D	513	1	1	7.06449	6.53971	-0.524783	2.46805e-06	4.27685e-05
ENSG00000099625	CBARP	255057	0.458333	0.470588	-0.537176	-0.709255	-0.172079	0.860661	0.919597
ENSG00000099769	IGFALS	3483	0.666667	0.8	1.34909	2.57835	1.22927	0.0393238	0.105948
ENSG00000099783	HNRNPM	4670	1	1	7.75106	7.76832	0.0172628	0.709553	0.819116
ENSG00000099785	MARCH2	51257	0.833333	0.729412	2.22005	1.30529	-0.914759	0.079037	0.178122
ENSG00000099795	NDUFB7	4713	1	1	6.92105	6.4392	-0.481845	1.09829e-05	0.000144567
ENSG00000099797	TECR	9524	1	1	8.78308	8.69032	-0.0927596	0.0432207	0.113503
ENSG00000099800	TIMM13	26517	1	1	6.55367	6.05135	-0.502317	0.000829567	0.00485977
ENSG00000099804	CDC34	997	1	1	6.69817	6.72092	0.0227499	0.827545	0.897881
ENSG00000099810	MTAP	4507	0.895833	0.894118	3.26875	3.31312	0.0443705	0.955141	0.97588
ENSG00000099812	MISP	126353	0.0833333	0.152941	-1.95344	-1.51036	0.443079	0.221146	0.374965
ENSG00000099814	CEP170B	283638	0.604167	0.588235	0.466411	0.419264	-0.0471468	0.949726	0.97186
ENSG00000099817	POLR2E	5434	1	1	9.90527	9.74833	-0.156931	0.0332273	0.0932109
ENSG00000099821	POLRMT	5442	1	0.988235	6.37444	6.72292	0.348485	0.00469294	0.0198115
ENSG00000099822	HCN2	610	0.979167	0.952941	4.30081	3.98174	-0.31907	0.225857	0.380524
ENSG00000099840	IZUMO4	113177	0.708333	0.611765	1.22085	0.729437	-0.49141	0.277763	0.44063
ENSG00000099849	RASSF7	8045	0.916667	0.976471	4.92935	5.17507	0.245721	0.641089	0.769443
ENSG00000099860	GADD45B	4616	1	0.823529	5.39026	2.52657	-2.86369	2.07679e-07	5.40084e-06
ENSG00000099864	PALM	5064	0.770833	0.517647	2.09436	0.289144	-1.80521	0.000561164	0.00355554
ENSG00000099866	MADCAM1	8174	0.229167	0.152941	-1.43885	-1.77495	-0.3361	0.259123	0.419405
ENSG00000099875	MKNK2	2872	0.979167	0.988235	5.22095	5.68604	0.465082	0.210974	0.362587
ENSG00000099889	ARVCF	421	0.520833	0.682353	0.720367	1.13394	0.413578	0.424162	0.589874
ENSG00000099899	TRMT2A	27037	0.895833	0.741176	3.5754	2.81636	-0.759033	0.274026	0.436301
ENSG00000099901	RANBP1	5902	1	1	7.42046	7.50187	0.0814032	0.233132	0.389511
ENSG00000099904	ZDHHC8	29801	0.75	0.929412	2.65783	3.45726	0.799431	0.281688	0.445534
ENSG00000099910	KLHL22	84861	0.5	0.282353	0.184065	-1.2347	-1.41877	0.00265028	0.0126075
ENSG00000099917	MED15	51586	1	1	7.25075	7.75423	0.503475	0.00405004	0.017672
ENSG00000099937	SERPIND1	3053	0.583333	0.623529	0.844572	1.12566	0.281089	0.544277	0.694403
ENSG00000099940	SNAP29	9342	1	1	6.59482	6.81997	0.225148	0.109616	0.225791
ENSG00000099942	CRKL	1399	0.9375	0.976471	3.76451	4.28492	0.520417	0.104506	0.218093
ENSG00000099949	LZTR1	8216	0.645833	0.4	1.13524	-0.617947	-1.75318	0.000816407	0.00479659
ENSG00000099953	MMP11	4320	0.3125	0.247059	-1.0056	-1.17252	-0.16692	0.559316	0.706405
ENSG00000099954	CECR2	27443	0.833333	0.847059	2.3104	2.64107	0.330665	0.744237	0.843935
ENSG00000099956	SMARCB1	6598	1	1	9.53892	9.80175	0.26283	0.0200135	0.0629094
ENSG00000099958	DERL3	91319	1	1	6.13655	6.20898	0.072428	0.501396	0.658648
ENSG00000099960	SLC7A4	6545	0.0833333	0.0588235	-1.88896	-2.00321	-0.114246	0.586875	0.726916
ENSG00000099968	BCL2L13	23786	0.979167	0.976471	4.65782	4.69475	0.0369327	0.438122	0.601982
ENSG00000099974	DDTL	100037417	0.375	0.376471	-0.616885	-0.911881	-0.294996	0.696245	0.809695
ENSG00000099977	DDT	1652100037417	1	1	4.92125	4.96206	0.0408128	0.661353	0.784577
ENSG00000099991	CABIN1	23523	0.8125	0.894118	3.106	3.19135	0.0853507	0.735562	0.837785
ENSG00000099992	TBC1D10A	83874	0.9375	0.988235	5.3243	6.07488	0.750583	0.00493837	0.0206367
ENSG00000099995	SF3A1	10291	1	1	7.36443	7.59022	0.225786	0.0556437	0.13654
ENSG00000099998	GGT5	2687	0.375	0.117647	-0.212551	-1.83471	-1.62215	0.00026067	0.00191144
ENSG00000099999	RNF215	200312	0.416667	0.341176	-0.0178622	-0.727645	-0.709783	0.166372	0.30685
ENSG00000100003	SEC14L2	23541	0.208333	0.188235	-1.36223	-1.74748	-0.385253	0.531344	0.684044
ENSG00000100014	SPECC1L	23384	1	1	5.37548	5.94187	0.566396	0.00964079	0.0352611
ENSG00000100023	PPIL2	23759	1	0.976471	5.66132	5.93307	0.271751	0.121529	0.24354
ENSG00000100024	UPB1	51733	1	1	8.23876	8.60278	0.364021	0.00333394	0.0151096
ENSG00000100027	YPEL1	29799	0.9375	1	4.34228	5.51637	1.17408	3.48512e-05	0.000381217
ENSG00000100028	SNRPD3	6634	1	1	5.59162	5.4805	-0.111126	0.483674	0.643469
ENSG00000100029	PES1	23481	1	0.988235	7.05919	7.25684	0.197647	0.169118	0.309965
ENSG00000100030	MAPK1	5594	0.979167	1	4.7734	5.50871	0.735312	0.00290792	0.0135609
ENSG00000100031	GGT1	2678	0.833333	0.870588	3.28389	3.83163	0.547737	0.115464	0.234514
ENSG00000100034	PPM1F	9647	1	1	7.28267	7.56828	0.285601	0.0587057	0.142268
ENSG00000100036	SLC35E4	339665	0.479167	0.623529	-0.25917	1.05554	1.31471	0.0123668	0.0430081
ENSG00000100038	TOP3B	8940	0.708333	0.658824	1.61316	1.49095	-0.122207	0.967685	0.982559
ENSG00000100053	CRYBB3	1417	0.291667	0.411765	-1.36813	-1.23891	0.12922	0.358554	0.526011
ENSG00000100055	CYTH4	27128	0.375	0.635294	-0.607448	1.77271	2.38016	0.000110372	0.000967376
ENSG00000100056	ESS2	8220	1	1	7.37194	7.89696	0.525024	0.0011204	0.00623594
ENSG00000100058	CRYBB2P1	.	0.75	0.6	1.59168	0.875752	-0.715923	0.284871	0.449084
ENSG00000100065	CARD10	29775	0.6875	0.811765	2.20915	3.08853	0.879375	0.0758714	0.172679
ENSG00000100068	LRP5L	91355	0.5	0.247059	0.151701	-1.2213	-1.373	0.00201623	0.0100304
ENSG00000100075	SLC25A1	6576	1	1	7.22141	7.20145	-0.0199625	0.938383	0.96582
ENSG00000100077	GRK3	157	0.520833	0.729412	-0.0882975	1.51078	1.59908	0.000913204	0.00527494
ENSG00000100083	GGA1	26088	0.9375	0.929412	4.46245	4.72956	0.267109	0.222228	0.376623
ENSG00000100084	HIRA	7290	0.6875	0.694118	1.27225	1.54097	0.268715	0.442516	0.60591
ENSG00000100092	SH3BP1	23616	0.729167	0.858824	1.7268	2.91919	1.19239	0.0263488	0.0779699
ENSG00000100097	LGALS1	3956	1	1	5.99035	4.51379	-1.47656	2.99647e-10	1.95232e-08
ENSG00000100099	HPS4	89781	1	1	5.68096	6.22052	0.539561	0.0153304	0.0508624
ENSG00000100100	PIK3IP1	113791	0.666667	0.635294	1.72191	1.19806	-0.52385	0.263182	0.424162
ENSG00000100101	Z83844.1	.	0.0625	0.164706	-1.97309	-1.36188	0.611212	0.083948	0.186563
ENSG00000100104	SRRD	402055	0.895833	0.976471	3.80772	4.37585	0.568131	0.238654	0.396083
ENSG00000100105	PATZ1	23598	0.875	0.752941	2.75022	1.72208	-1.02814	0.0829758	0.184845
ENSG00000100106	TRIOBP	11078	0.9375	0.917647	4.08669	3.99901	-0.0876853	0.639358	0.768558
ENSG00000100109	TFIP11	24144	0.979167	0.964706	5.08015	5.76202	0.681869	0.000636891	0.00393388
ENSG00000100116	GCAT	23464	1	1	8.52509	8.6591	0.134012	0.321747	0.4878
ENSG00000100124	ANKRD54	129138	1	0.952941	5.35843	4.90524	-0.453189	0.695649	0.809109
ENSG00000100129	EIF3L	51386	1	1	9.30674	8.99286	-0.313881	3.63057e-05	0.000394009
ENSG00000100138	SNU13	4809	1	1	8.73983	8.79885	0.0590173	0.621118	0.755028
ENSG00000100139	MICALL1	85377	0.4375	0.564706	-0.143511	0.313798	0.457309	0.320223	0.486666
ENSG00000100142	POLR2F	5435	1	1	5.69209	5.58769	-0.104405	0.463436	0.625183
ENSG00000100146	SOX10	6663	0.229167	0.235294	-1.05993	-1.16947	-0.109538	0.959655	0.978276
ENSG00000100147	CCDC134	79879	0.416667	0.388235	-0.437744	-0.472768	-0.0350247	0.913536	0.950721
ENSG00000100150	DEPDC5	9681	0.875	0.917647	3.15906	3.68021	0.521152	0.0994477	0.21131
ENSG00000100151	PICK1	9463	0.9375	0.964706	4.7478	4.90858	0.160773	0.79665	0.878199
ENSG00000100154	TTC28	23331	0.791667	0.847059	1.9528	2.0526	0.0998007	0.701857	0.81393
ENSG00000100156	SLC16A8	23539	0.729167	0.835294	0.921857	1.37859	0.456733	0.259839	0.4201
ENSG00000100162	CENPM	79019	0.875	0.847059	3.11675	2.5792	-0.537554	0.0349473	0.0969423
ENSG00000100167	SEPTIN3	55964	0.583333	0.564706	0.787579	0.918212	0.130633	0.920297	0.954751
ENSG00000100170	SLC5A1	6523	0.354167	0.411765	-0.606489	-0.38732	0.219169	0.626105	0.759098
ENSG00000100181	TPTEP1	.	0.5625	0.458824	-0.439308	-0.83046	-0.391151	0.312096	0.478273
ENSG00000100196	KDELR3	11015	0.979167	1	5.34695	5.28263	-0.0643262	0.160571	0.298605
ENSG00000100197	CYP2D6	1.56511e+21	0.354167	0.164706	-0.938896	-1.68091	-0.742011	0.0146551	0.0491408
ENSG00000100201	DDX17	10521	1	1	5.80151	5.19962	-0.601889	0.000173331	0.00138802
ENSG00000100206	DMC1	11144	0.125	0.282353	-1.96822	-1.26286	0.705354	0.0274223	0.0804652
ENSG00000100207	TCF20	6942	0.791667	0.941176	2.36042	3.58339	1.22297	0.0166933	0.0544599
ENSG00000100209	HSCB	150274	0.875	0.858824	2.75501	1.9568	-0.798216	0.00235032	0.0114205
ENSG00000100211	CBY1	25776	1	0.952941	5.16101	4.44376	-0.717247	0.0587024	0.142268
ENSG00000100216	TOMM22	56993	1	1	6.11535	6.10086	-0.0144918	0.938383	0.96582
ENSG00000100218	RSPH14	27156	0.5	0.682353	-0.543253	0.81695	1.3602	0.00235931	0.0114581
ENSG00000100219	XBP1	7494	1	0.988235	6.79704	6.3268	-0.470238	0.00829088	0.031171
ENSG00000100220	RTCB	51493	1	1	7.91621	8.25426	0.338057	0.0291938	0.0841421
ENSG00000100221	JOSD1	9929	0.916667	0.894118	3.34116	3.12858	-0.212576	0.886323	0.935253
ENSG00000100225	FBXO7	25793	1	1	8.48895	8.95662	0.467665	2.25954e-05	0.000266195
ENSG00000100226	GTPBP1	9567	1	1	5.58751	6.26393	0.676412	9.64567e-06	0.000130558
ENSG00000100227	POLDIP3	84271	1	0.988235	6.41791	6.38725	-0.0306621	0.342768	0.509514
ENSG00000100228	RAB36	9609	0.75	0.835294	1.42007	2.52031	1.10024	0.0149506	0.049903
ENSG00000100234	TIMP3	7078	0.729167	0.576471	2.17892	0.752139	-1.42678	0.00542492	0.0222385
ENSG00000100239	PPP6R2	9701	0.958333	0.952941	4.31486	4.53095	0.216087	0.547143	0.696275
ENSG00000100241	SBF1	6305	0.9375	0.976471	4.73766	5.0664	0.328737	0.957032	0.976314
ENSG00000100242	SUN2	25777	0.875	0.788235	3.25449	2.50323	-0.751262	0.0967092	0.207099
ENSG00000100243	CYB5R3	1727	1	1	8.26119	7.76392	-0.497266	2.96439e-06	5.02206e-05
ENSG00000100246	DNAL4	10126	0.958333	0.882353	4.24849	3.94258	-0.30591	0.712944	0.8219
ENSG00000100253	MIOX	55586	0.458333	0.411765	-0.232019	-0.320074	-0.0880542	0.737589	0.839208
ENSG00000100258	LMF2	91289	1	1	8.18629	8.16811	-0.0181806	0.968235	0.982559
ENSG00000100263	RHBDD3	25807	0.625	0.423529	0.98104	-0.436489	-1.41753	0.00376682	0.0166886
ENSG00000100266	PACSIN2	11252	0.979167	1	5.2427	5.90883	0.666134	0.00185088	0.00934852
ENSG00000100271	TTLL1	25809	0.916667	0.964706	4.83992	5.04612	0.206201	0.364613	0.531972
ENSG00000100276	RASL10A	10633	0.958333	0.976471	4.95051	5.26407	0.313554	0.794848	0.87696
ENSG00000100280	AP1B1	162	0.958333	1	5.76527	6.51535	0.750075	0.0212973	0.0659194
ENSG00000100281	HMGXB4	10042	0.958333	0.976471	4.43861	4.9283	0.489687	0.0427359	0.112642
ENSG00000100284	TOM1	10043	0.979167	0.988235	6.22103	6.69386	0.472827	0.0401672	0.107499
ENSG00000100285	NEFH	4744	0.979167	1	6.6465	7.30563	0.65914	0.0016821	0.00865882
ENSG00000100288	CHKB	1120	0.9375	0.905882	3.68843	3.45819	-0.230238	0.234843	0.391864
ENSG00000100290	BIK	638	1	1	7.50118	8.0701	0.568915	0.000312038	0.00221053
ENSG00000100292	HMOX1	3162	0.958333	0.976471	5.88597	5.96112	0.0751435	0.594897	0.73351
ENSG00000100294	MCAT	27349	1	0.976471	5.89937	5.84974	-0.0496317	0.395144	0.561342
ENSG00000100296	THOC5	8563	0.875	0.823529	3.66739	2.9235	-0.743886	0.0740753	0.169547
ENSG00000100297	MCM5	4174	1	1	8.54974	8.87231	0.322576	0.0377287	0.1027
ENSG00000100299	ARSA	410	0.479167	0.223529	0.499029	-1.28041	-1.77944	0.00038703	0.00263302
ENSG00000100300	TSPO	706	0.854167	0.482353	3.20385	-0.272531	-3.47639	1.67875e-09	8.50035e-08
ENSG00000100304	TTLL12	23170	0.979167	1	7.04701	7.8214	0.774392	0.000504039	0.00325601
ENSG00000100307	CBX7	23492	0.75	0.576471	1.34436	0.578276	-0.766086	0.0963351	0.206531
ENSG00000100311	PDGFB	5155	0.0833333	0.0117647	-1.80928	-2.26011	-0.450832	0.0359985	0.0992539
ENSG00000100314	CABP7	164633	0.0625	0.176471	-2.15139	-1.73806	0.413333	0.0669665	0.156992
ENSG00000100316	RPL3	6122	1	1	11.9391	10.8437	-1.09545	2.4439e-14	8.38213e-12
ENSG00000100319	ZMAT5	55954	1	0.988235	4.97669	4.87869	-0.0979999	0.31044	0.476459
ENSG00000100320	RBFOX2	23543	0.979167	0.988235	5.40391	5.14169	-0.262214	0.30049	0.466067
ENSG00000100321	SYNGR1	9145	0.916667	0.647059	4.094	1.03395	-3.06005	7.85302e-11	6.28864e-09
ENSG00000100324	TAB1	10454	0.875	0.882353	4.13927	4.20846	0.0691924	0.685034	0.801885
ENSG00000100325	ASCC2	84164	1	1	7.35104	8.07995	0.728908	0.00188048	0.00946645
ENSG00000100330	MTMR3	8897	1	0.988235	5.46024	6.21222	0.751976	9.42509e-05	0.000857075
ENSG00000100335	MIEF1	54471	0.875	0.823529	3.19632	3.2429	0.0465858	0.232213	0.388511
ENSG00000100336	APOL4	80832	0.0833333	0.0470588	-2.01755	-2.10349	-0.0859428	0.409806	0.576004
ENSG00000100342	APOL1	8542	0.354167	0.0705882	-0.833819	-2.1133	-1.27948	1.99357e-05	0.000239518
ENSG00000100344	PNPLA3	80339	0.416667	0.517647	-0.0399671	0.348405	0.388372	0.380858	0.547638
ENSG00000100345	MYH9	4627	1	0.964706	5.67587	4.60787	-1.06799	1.08946e-06	2.17895e-05
ENSG00000100346	CACNA1I	8911	0.604167	0.764706	0.795784	1.93872	1.14294	0.0285324	0.0828917
ENSG00000100347	SAMM50	25813	1	1	6.94387	7.09029	0.146416	0.540941	0.691945
ENSG00000100348	TXN2	25828	1	1	8.69684	8.47828	-0.218566	0.00701338	0.0272996
ENSG00000100350	FOXRED2	80020	0.979167	0.964706	5.09769	4.8725	-0.225185	0.561277	0.70761
ENSG00000100351	GRAP2	9402	0.104167	0.258824	-1.89655	-1.13676	0.759784	0.0318051	0.0900971
ENSG00000100353	EIF3D	8664	1	1	7.65026	7.0935	-0.556758	4.10119e-05	0.000434956
[truncated: 16,179 more rows]
