# Supplementary material for: Single-oocyte transcriptional profile of early-stage human oocytes reveals differentially expressed genes in the primordial and transitioning stages
Source: Research Square preprint supplement (doi:10.21203/rs.3.rs-6957514/v1), 2025-07-03
Supplement: Supplementary file 2 [file 5ef76927aa76ce5978ed5348.xlsx]

## Sheet: Panther Pathway
	Id	Name	ConceptType	#Genes	Coeff	OddsRatio	P-Value	FDR	Direction	SigGenes	FDR2
2	882842	FAS signaling pathway	Panther Pathway	25	0.0652023	1.49961	0.0138467	0.164757	up	1537, 207, 2934, 3725, 4000, 8837	0.201569
8	882870	Insulin/IGF pathway-mitogen activated protein kinase kinase/MAP kinase cascade	Panther Pathway	24	0.0637752	1.48637	0.019016	0.178275	up	2353, 3482, 3643, 5605, 5894, 6199	0.201569
7	882957	Cytoskeletal regulation by Rho GTPase	Panther Pathway	47	0.0556005	1.41275	0.00860855	0.164757	up	10109, 1072, 203068, 388, 389, 4627, 4638, 59, 60, 84617	0.201569
1	882923	Integrin signalling pathway	Panther Pathway	106	0.0523553	1.38454	0.00077871	0.0584033	up	10109, 1277, 1278, 1284, 1289, 1291, 1292, 1293, 2316, 3611, 3688, 388, 389, 55679, 5605, 5894, 60, 7094, 857	0.0412716
21	882930	Toll receptor signaling pathway	Panther Pathway	29	0.0427286	1.30414	0.127806	0.456452	up	3654, 3725, 51295, 5605, 7128	0.479486
3	882893	Inflammation mediated by chemokine and cytokine signaling pathway	Panther Pathway	107	0.0391582	1.27552	0.0153773	0.164757	up	10109, 1291, 1292, 1293, 207, 3725, 3726, 3727, 389, 4627, 4638, 5566, 5894, 59, 60, 9021	0.201569
16	882953	Apoptosis signaling pathway	Panther Pathway	79	0.0339638	1.235	0.0687639	0.334244	up	207, 2353, 3303, 3304, 3482, 3725, 468, 54205, 581, 8837	0.365034
35	882967	Oxidative stress response	Panther Pathway	36	0.0280127	1.19016	0.306473	0.638484	up	1649, 1843, 1844, 3725, 7295	0.624732
18	882915	Angiogenesis	Panther Pathway	106	0.027475	1.18619	0.103665	0.431936	up	207, 2353, 3725, 388, 389, 5159, 5337, 5781, 5894, 7041, 80310	0.457853
36	882971	T cell activation	Panther Pathway	56	0.0249617	1.16781	0.269718	0.638484	up	207, 2353, 3725, 5530, 5605, 567, 5894, 808, 972	0.624732
46	882910	p53 pathway by glucose deprivation	Panther Pathway	20	0.024415	1.16385	0.509188	0.830197	up	1978, 207, 5516, 6199	0.793734
32	882850	TGF-beta signaling pathway	Panther Pathway	56	0.0235632	1.1577	0.300485	0.638484	up	2286, 3725, 3726, 3727, 649	0.624732
43	882927	PI3 kinase pathway	Panther Pathway	43	0.0215085	1.14301	0.407864	0.71139	up	207, 2771, 3643, 6199	0.688251
40	882894	Interleukin signaling pathway	Panther Pathway	55	0.021357	1.14194	0.35673	0.668868	up	207, 2353, 3572, 3718, 5894, 6773	0.651954
45	882955	B cell activation	Panther Pathway	42	0.0209804	1.13927	0.425761	0.714222	up	2353, 3725, 5530, 5605, 5894, 808	0.688251
52	882824	Insulin/IGF pathway-protein kinase B signaling cascade	Panther Pathway	28	0.0137194	1.089	0.678332	0.913303	up	207, 3482, 3643	0.871835
71	882962	Metabotropic glutamate receptor group II pathway	Panther Pathway	27	0.0125096	1.08084	0.71172	0.913303	up	2771, 2791, 5566, 5577	0.871835
67	882914	Alzheimer disease-presenilin pathway	Panther Pathway	54	0.0113456	1.07305	0.641778	0.913303	up	351, 4035, 4037, 4313, 59, 60	0.871835
57	882848	Ras Pathway	Panther Pathway	59	0.00760181	1.04838	0.748762	0.913303	up	207, 3725, 388, 389, 5337, 5605, 5894	0.871835
64	882906	Huntington disease	Panther Pathway	93	0.00702067	1.0446	0.715357	0.913303	up	11258, 1537, 1778, 203068, 207, 2353, 3725, 581, 59, 60, 823, 826, 84617	0.871835
66	882913	VEGF signaling pathway	Panther Pathway	46	0.00658731	1.04179	0.806036	0.913303	up	207, 5894, 7041	0.871835
56	882845	Parkinson disease	Panther Pathway	70	0.00543666	1.03436	0.805513	0.913303	up	10273, 3303, 3304, 4729, 5682, 5689, 5699, 9246	0.871835
62	882896	PDGF signaling pathway	Panther Pathway	100	0.00385812	1.02427	0.83765	0.913303	up	2353, 3718, 3725, 388, 5605, 5894, 6199, 6773	0.88122
73	882926	Muscarinic acetylcholine receptor 2 and 4 signaling pathway	Panther Pathway	29	-0.0038481	0.976369	0.912115	0.937105	down	2054, 2773, 3763, 54331, 5573, 5576, 6809, 9341	0.912115
59	882866	De novo purine biosynthesis	Panther Pathway	24	-0.00658242	0.959918	0.864593	0.913303	down	159, 205, 2618, 26289, 5471, 6240, 6241	0.88122
54	882834	5HT1 type receptor mediated signaling pathway	Panther Pathway	22	-0.00745821	0.954708	0.853556	0.913303	down	2773, 51305, 54331, 5576, 6809, 9341	0.88122
61	882874	Nicotinic acetylcholine receptor signaling pathway	Panther Pathway	49	-0.00774101	0.953031	0.7773	0.913303	down	1136, 1138, 1139, 2054, 22989, 23026, 4643, 4646, 4651, 6809, 775, 84700, 9341	0.871835
50	882822	GABA-B receptor II signaling	Panther Pathway	22	-0.0100831	0.93926	0.804503	0.913303	down	111, 115, 2773, 54331, 5573, 5576, 9568	0.871835
60	882871	Interferon-gamma signaling pathway	Panther Pathway	25	-0.0106823	0.935769	0.780418	0.913303	down	51588, 5594, 5599, 6772, 8554, 9063	0.871835
65	882907	Hypoxia response via HIF activation	Panther Pathway	24	-0.0111926	0.932806	0.774974	0.913303	down	2475, 3091, 5289, 5293, 5295, 5728, 7179	0.871835
49	882889	FGF signaling pathway	Panther Pathway	83	-0.0115417	0.930785	0.592032	0.90674	down	10971, 2259, 5289, 5293, 5336, 5515, 5521, 5525, 5537, 5581, 5583, 5588, 5594, 5599, 5604, 5879, 5880, 7529, 7532, 7533	0.848578
53	882833	Transcription regulation by bZIP transcription factor	Panther Pathway	44	-0.0130941	0.921848	0.654809	0.913303	down	2958, 2959, 2960, 2965, 387332, 51616, 5573, 5576, 6880, 6908, 7270, 80298, 9519	0.871835
47	882861	Beta2 adrenergic receptor signaling pathway	Panther Pathway	27	-0.0202598	0.881697	0.592404	0.90674	down	54331, 5576, 6809, 775, 9341	0.848578
48	882885	Beta1 adrenergic receptor signaling pathway	Panther Pathway	27	-0.0202598	0.881697	0.592404	0.90674	down	54331, 5576, 6809, 775, 9341	0.848578
42	882959	Heterotrimeric G-protein signaling pathway-Gi alpha and Gs alpha mediated pathway	Panther Pathway	65	-0.0216222	0.874263	0.383436	0.684707	down	109, 111, 115, 2773, 2915, 2931, 2932, 29899, 3274, 3763, 54331, 5573, 5576, 5908, 5997, 6000, 801, 805	0.677403
33	882888	EGF receptor signaling pathway	Panther Pathway	91	-0.0224027	0.870033	0.290902	0.638484	down	10971, 2066, 22800, 5289, 5293, 5336, 5515, 5525, 5537, 5581, 5583, 5588, 5594, 5599, 5604, 5609, 5879, 5880, 6772, 6774, 7039, 7529, 7532, 7533, 9846	0.624732
38	882876	p53 pathway	Panther Pathway	59	-0.0251741	0.855177	0.336396	0.648505	down	1017, 25942, 3732, 51512, 5170, 5289, 5293, 5295, 5515, 5728, 6241, 64393, 6477, 7179, 8493, 8626, 891, 983	0.638314
44	882891	General transcription regulation	Panther Pathway	30	-0.0289658	0.835261	0.428533	0.714222	down	2958, 2959, 2960, 2965, 51616, 6880, 7270, 80298, 9519	0.688251
28	882820	Alzheimer disease-amyloid secretase pathway	Panther Pathway	51	-0.0298137	0.830871	0.292709	0.638484	down	1139, 23385, 320, 3831, 5125, 5581, 5583, 5588, 5594, 5596, 5597, 5598, 5599, 5663, 5664, 775	0.624732
31	882841	Endothelin signaling pathway	Panther Pathway	51	-0.030649	0.826569	0.28011	0.638484	down	109, 111, 115, 23236, 2767, 3710, 5289, 5293, 5295, 5573, 5576, 5581, 5583, 5588, 5592, 5594, 5604, 9630	0.624732
11	882900	Wnt signaling pathway	Panther Pathway	145	-0.0348236	0.805401	0.0481637	0.334244	down	1001, 1002, 1010, 1012, 1015, 1016, 1453, 1456, 1457, 1488, 1495, 1496, 1499, 159, 22881, 23236, 23401, 2767, 2932, 3710, 4772, 4773, 4775, 51176, 51701, 54331, 5515, 5525, 5537, 5581, 5583, 5588, 6477, 6595, 6602, 7088, 7091, 79718, 79816, 8945, 90780, 91, 9630	0.365034
34	882949	5HT2 type receptor mediated signaling pathway	Panther Pathway	40	-0.0378705	0.790294	0.240296	0.638484	down	23236, 2767, 51305, 5336, 54331, 5581, 5583, 5588, 6809, 775, 9341, 9630	0.624732
24	882903	Heterotrimeric G-protein signaling pathway-Gq alpha and Go alpha mediated pathway	Panther Pathway	51	-0.0394988	0.782337	0.16962	0.530063	down	10125, 23236, 25780, 2915, 29899, 3710, 3763, 54331, 5581, 5583, 5588, 5908, 5997, 6000	0.528816
39	882965	Notch signaling pathway	Panther Pathway	24	-0.0397693	0.781023	0.337223	0.648505	down	182, 222484, 23385, 2530, 55294, 5663, 5664, 84708, 8650	0.638314
30	882826	Muscarinic acetylcholine receptor 1 and 3 signaling pathway	Panther Pathway	30	-0.0402972	0.778465	0.278479	0.638484	down	2767, 2904, 3710, 54331, 5581, 5583, 5588, 9341, 9630	0.624732
25	882851	Thyrotropin-releasing hormone receptor signaling pathway	Panther Pathway	38	-0.0441594	0.760003	0.184717	0.545224	down	23236, 2767, 5336, 54331, 5581, 5583, 5588, 6809, 9341, 9630	0.543888
22	882875	Oxytocin receptor mediated signaling pathway	Panther Pathway	38	-0.0489595	0.737666	0.143015	0.472012	down	23236, 2767, 5336, 54331, 5581, 5583, 5588, 6809, 775, 9341, 9630	0.479486
19	882899	Ubiquitin proteasome pathway	Panther Pathway	42	-0.0497749	0.733937	0.118444	0.454963	down	10054, 10055, 11060, 11065, 29089, 5707, 5708, 64750, 7319, 7321, 7323, 7324, 7325, 7326, 7334	0.479486
23	882904	Histamine H1 receptor mediated signaling pathway	Panther Pathway	30	-0.054803	0.711358	0.14475	0.472012	down	23236, 2767, 3710, 5336, 54331, 5581, 5583, 5588, 9630	0.479486
15	882936	Cadherin signaling pathway	Panther Pathway	40	-0.0582026	0.696487	0.0757619	0.334244	down	1001, 1002, 10097, 1010, 1012, 1015, 1016, 1457, 1495, 1496, 1499, 2066, 2534, 2932, 51176, 5770, 7525	0.365034
10	882877	p53 pathway feedback loops 2	Panther Pathway	38	-0.0599702	0.688878	0.0743192	0.334244	down	1017, 1499, 5170, 5289, 5293, 5295, 5515, 5728, 6477, 6772, 7179, 8493, 8626, 890	0.365034
17	882963	Metabotropic glutamate receptor group III pathway	Panther Pathway	32	-0.067155	0.658796	0.0657758	0.334244	down	143187, 2773, 2890, 2898, 2900, 2904, 2915, 54331, 5573, 5576, 57030, 9341	0.365034
14	882935	Axon guidance mediated by netrin	Panther Pathway	22	-0.0786013	0.61356	0.0710058	0.334244	down	1630, 4773, 4775, 5293, 5295, 5336, 5879, 5880, 7408, 8633, 998	0.365034

## Sheet: KEGG
	Id	Name	ConceptType	#Genes	Coeff	OddsRatio	P-Value	FDR	Direction	SigGenes	FDR2	SigGenes_external_name
76	hsa03010	Ribosome	KEGG	85	0.188634	3.22937	1.87878e-55	3.60725e-53	up	11224, 2197, 23521, 25873, 3921, 4736, 6122, 6124, 6125, 6128, 6129, 6130, 6132, 6133, 6134, 6135, 6136, 6137, 6138, 6139, 6141, 6142, 6143, 6144, 6146, 6147, 6152, 6154, 6155, 6156, 6157, 6158, 6159, 6160, 6161, 6164, 6165, 6166, 6167, 6168, 6169, 6170, 6171, 6173, 6175, 6176, 6181, 6187, 6188, 6189, 6191, 6193, 6194, 6201, 6202, 6203, 6204, 6205, 6206, 6207, 6208, 6209, 6210, 6217, 6218, 6222, …	2.70544e-53	RPS20, RPL18, RPL31, RPS5, RPL6, RPLP0, RPL3, RPS16, RPS19, RPL18A, RPL28, RPL19, RPL34, RPS13, RPS12, RPL24, RPS15, RPL22, RPS25, RPL21, RPL5, RPS10, RPL23, RPL36, RPL27, RPS15A, RPL35, RPS6, RPLP1, RPS24, RPS2, RPS11, RPL13A, RPL11, RPS8, RPS27A, RPL32, RPS3A, RPL37, RPL10, RPL7, RPL7A, RPS3, FAU, RPL30, RPL8, RPL26, RPL29, RPL9, RPS14, RPL36AL, RPL27A, RPL13, RPSA, RPS9, RPS21, RPS7, RPL38, RP…
77	hsa05012	Parkinson's disease	KEGG	119	0.089561	1.74471	2.1575e-18	2.0712e-16	up	10476, 10975, 11315, 126328, 1329, 1337, 1345, 1347, 1351, 1537, 293, 29796, 4508, 4509, 4512, 4513, 4514, 4519, 4535, 4536, 4537, 4538, 4539, 4540, 4541, 4697, 4710, 4713, 4714, 4715, 4716, 4724, 4725, 4729, 51079, 513, 516, 517, 522, 539, 54205, 54539, 6392, 7381, 7386, 7388, 7417, 9246	1.5534e-16	NDUFB4, ATP5F1D, NDUFB7, COX6A1, COX7A2, PARK7, UQCR11, ATP5MC2, COX5B, NDUFB10, NDUFB11, NDUFB9, ATP5PF, UQCRB, UBE2L6, ATP5MC1, NDUFS4, COX6C, VDAC2, NDUFB8, ATP5PD, NDUFS5, UQCRFS1, SLC25A6, CYCS, UQCRH, NDUFA11, COX8A, NDUFV2, CYC1, UQCR10, NDUFA13, NDUFA4, MT-ND6, MT-CO2, MT-CYB, MT-ND2, MT-ND5, MT-CO1, MT-ND3, MT-ND4, MT-ND1, MT-ATP6, MT-CO3, SDHD, MT-ND4L, MT-ATP8, ATP5PO
78	hsa00190	Oxidative phosphorylation	KEGG	118	0.0865507	1.71237	6.27035e-17	4.01303e-15	up	10476, 10975, 126328, 1329, 1337, 1345, 1347, 1351, 1537, 29796, 4508, 4509, 4512, 4513, 4514, 4519, 4535, 4536, 4537, 4538, 4539, 4540, 4541, 4697, 4710, 4713, 4714, 4715, 4716, 4724, 4725, 4729, 51079, 513, 516, 517, 522, 539, 54539, 5464, 6392, 7381, 7386, 7388	3.00977e-15	NDUFB4, ATP5F1D, NDUFB7, COX6A1, COX7A2, UQCR11, ATP5MC2, COX5B, NDUFB10, NDUFB11, NDUFB9, ATP5PF, UQCRB, ATP5MC1, NDUFS4, COX6C, NDUFB8, ATP5PD, NDUFS5, UQCRFS1, UQCRH, NDUFA11, COX8A, NDUFV2, CYC1, PPA1, UQCR10, NDUFA13, NDUFA4, MT-ND6, MT-CO2, MT-CYB, MT-ND2, MT-ND5, MT-CO1, MT-ND3, MT-ND4, MT-ND1, MT-ATP6, MT-CO3, SDHD, MT-ND4L, MT-ATP8, ATP5PO
82	hsa04260	Cardiac muscle contraction	KEGG	49	0.0763496	1.60718	8.83924e-07	2.42448e-05	up	10975, 1329, 1337, 1345, 1347, 1351, 1537, 29796, 4512, 4513, 4514, 4519, 7169, 7171, 7381, 7386, 7388, 784	1.81836e-05	COX6A1, COX7A2, UQCR11, COX5B, UQCRB, COX6C, TPM4, CACNB3, UQCRFS1, UQCRH, COX8A, CYC1, UQCR10, TPM2, MT-CO2, MT-CYB, MT-CO1, MT-CO3
87	hsa04612	Antigen processing and presentation	KEGG	31	0.0757136	1.60084	8.28631e-05	0.00137589	up	1514, 3105, 3106, 3107, 3133, 3303, 3304, 567, 5720, 5721, 972	0.00103192	CD74, PSME1, PSME2, CTSL, B2M, HSPA1B, HSPA1A, HLA-C, HLA-E, HLA-B
85	hsa04512	ECM-receptor interaction	KEGG	38	0.0720376	1.56469	5.37196e-05	0.00103142	up	1277, 1278, 1284, 1289, 1291, 1292, 1293, 3688, 3908, 3911, 3915, 7057, 961	0.000773562	COL1A1, COL5A1, LAMA5, COL4A2, LAMC1, THBS1, COL6A1, COL6A2, ITGB1, COL6A3, COL1A2, LAMA2, CD47
80	hsa05010	Alzheimer's disease	KEGG	133	0.063705	1.48572	2.66273e-09	1.02249e-07	up	10476, 10975, 126328, 1329, 1337, 1345, 1347, 1351, 1537, 29796, 3028, 348, 351, 4035, 4508, 4509, 4512, 4513, 4514, 4519, 4697, 4710, 4713, 4714, 4715, 4716, 4724, 4725, 4729, 51079, 513, 516, 517, 522, 539, 54205, 54539, 5530, 6392, 7381, 7386, 7388, 808, 823	7.66867e-08	CAPN1, NDUFB4, HSD17B10, ATP5F1D, NDUFB7, COX6A1, COX7A2, LRP1, UQCR11, APOE, ATP5MC2, COX5B, PPP3CA, NDUFB10, APP, NDUFB11, NDUFB9, ATP5PF, UQCRB, ATP5MC1, CALM3, NDUFS4, COX6C, NDUFB8, ATP5PD, NDUFS5, UQCRFS1, CYCS, UQCRH, NDUFA11, COX8A, NDUFV2, CYC1, UQCR10, NDUFA13, NDUFA4, MT-CO2, MT-CYB, MT-CO1, MT-ATP6, MT-CO3, SDHD, MT-ATP8, ATP5PO
90	hsa04974	Protein digestion and absorption	KEGG	36	0.0633374	1.48233	0.000965743	0.0123615	up	1277, 1278, 1284, 1289, 1291, 1292, 1293, 54407, 80781	0.0106975	COL1A1, COL5A1, SLC38A2, COL4A2, COL6A1, COL6A2, COL6A3, COL1A2, COL18A1
83	hsa05016	Huntington's disease	KEGG	162	0.0506578	1.37001	1.19298e-06	2.86314e-05	up	10476, 10488, 10540, 10975, 1175, 126328, 1329, 1337, 1345, 1347, 1351, 1537, 293, 29796, 4508, 4509, 4512, 4513, 4514, 4519, 4697, 4710, 4713, 4714, 4715, 4716, 4724, 4725, 4729, 51079, 513, 516, 517, 522, 539, 54205, 54539, 581, 6392, 7381, 7386, 7388, 7417	2.14736e-05	AP2S1, NDUFB4, BAX, ATP5F1D, NDUFB7, CREB3, COX6A1, COX7A2, UQCR11, ATP5MC2, COX5B, NDUFB10, NDUFB11, NDUFB9, ATP5PF, UQCRB, ATP5MC1, NDUFS4, COX6C, VDAC2, NDUFB8, ATP5PD, NDUFS5, UQCRFS1, SLC25A6, CYCS, UQCRH, NDUFA11, DCTN2, COX8A, NDUFV2, CYC1, UQCR10, NDUFA13, NDUFA4, MT-CO2, MT-CYB, MT-CO1, MT-ATP6, MT-CO3, SDHD, MT-ATP8, ATP5PO
120	hsa05416	Viral myocarditis	KEGG	36	0.0412122	1.29191	0.0596234	0.243568	up	3105, 3106, 3107, 3133, 3908, 4627, 54205, 60, 6443, 857	0.220148	ACTB, MYH9, CAV1, SGCB, CYCS, LAMA2, HLA-C, HLA-E, HLA-B
91	hsa04510	Focal adhesion	KEGG	123	0.0380333	1.26663	0.00231955	0.0272586	up	103910, 10398, 10627, 1277, 1278, 1284, 1289, 1291, 1292, 1293, 207, 2316, 3611, 3688, 3725, 3908, 3911, 3915, 4638, 5159, 5894, 60, 7057, 7094, 80310, 857	0.0231551	MYLK, ACTB, MYL9, MYL12A, CAV1, COL1A1, PDGFRB, MYL12B, COL5A1, LAMA5, RAF1, COL4A2, LAMC1, TLN1, THBS1, COL6A1, COL6A2, AKT1, ITGB1, COL6A3, COL1A2, ILK, PDGFD, JUN, LAMA2, FLNA
152	hsa00860	Porphyrin and chlorophyll metabolism	KEGG	21	0.0378872	1.26548	0.192216	0.48429	up	2495, 2512, 326625, 644, 645, 7389, 7390	0.430273	FTL, BLVRB, BLVRA, UROD, MMAB, FTH1, UROS
147	hsa05219	Bladder cancer	KEGG	26	0.0362779	1.25289	0.169733	0.452621	up	1019, 1612, 4313, 5605, 5894, 7057	0.400681	MMP2, MAP2K2, RAF1, CDK4, THBS1, DAPK1
125	hsa05322	Systemic lupus erythematosus	KEGG	45	0.0360604	1.2512	0.0750232	0.285506	up	3015, 55766, 715, 716, 718, 721, 730, 8364	0.253968	C7, C3, C1R, H2AFZ, C1S, HIST1H4C, C4B, H2AFJ
138	hsa00480	Glutathione metabolism	KEGG	36	0.0344428	1.23868	0.130689	0.39829	up	2878, 2879, 2946, 2948, 2949, 2950, 4259, 6723, 9446	0.355079	GSTP1, SRM, GSTM5, MGST3, GSTO1, GPX4, GSTM4, GPX3, GSTM2
134	hsa03050	Proteasome	KEGG	39	0.0342631	1.2373	0.118398	0.385294	up	5682, 5689, 5692, 5694, 5714, 5720, 5721, 7979	0.347944	PSMB1, PSME1, PSMD8, PSME2, SEM1, PSMA1, PSMB6, PSMB4
149	hsa04514	Cell adhesion molecules (CAMs)	KEGG	47	0.0273026	1.18492	0.190875	0.48429	up	2734, 3105, 3106, 3107, 3133, 3688, 4684, 5010	0.430273	CLDN11, GLG1, NCAM1, ITGB1, HLA-C, HLA-E, HLA-B
159	hsa00330	Arginine and proline metabolism	KEGG	39	0.026809	1.18129	0.242263	0.553744	up	112483, 1152, 217, 2628, 4129, 435, 445, 6303, 6723	0.505593	MAOB, ALDH2, SRM, ASL, SAT1, ASS1, SAT2, CKB, GATM
144	hsa04270	Vascular smooth muscle contraction	KEGG	60	0.0261759	1.17665	0.160765	0.447345	up	10398, 140465, 4637, 4638, 4660, 5566, 5605, 5894, 59, 800, 808, 94274	0.39914	MYLK, PRKACA, PPP1R12B, MYL6, MYL9, ACTA2, CALD1, MAP2K2, RAF1, CALM3, PPP1R14A, MYL6B
171	hsa05140	Leishmaniasis	KEGG	31	0.0238957	1.1601	0.35982	0.73005	up	2353, 3654, 3688, 3725, 65108, 718	0.678801	C3, ITGB1, FOS, MARCKSL1, JUN, IRAK1
141	hsa04145	Phagosome	KEGG	84	0.0233384	1.15608	0.147885	0.43021	up	10952, 1514, 1778, 203068, 23480, 3105, 3106, 3107, 3133, 3688, 60, 7057, 715, 718, 7846, 78989, 84617	0.380275	ACTB, SEC61B, COLEC11, C3, SEC61G, CTSL, THBS1, ITGB1, C1R, TUBA1A, TUBB6, TUBB, DYNC1H1, HLA-C, HLA-E, HLA-B
181	hsa00380	Tryptophan metabolism	KEGG	21	0.023095	1.15434	0.467253	0.823051	up	125061, 217, 3030, 4129	0.782377	MAOB, HADHA, ALDH2, AFMID
160	hsa04380	Osteoclast differentiation	KEGG	71	0.019001	1.12534	0.28845	0.651559	up	207, 2274, 2353, 3725, 3726, 3727, 5530, 6773, 9021	0.593384	FHL2, JUND, PPP3CA, AKT1, FOS, STAT2, JUNB, JUN, SOCS3
209	hsa03060	Protein export	KEGG	22	0.0177878	1.11689	0.578403	0.875022	up	10952, 23478, 23480, 5018, 6727	0.840758	SEC61B, SEC61G, SRP14, SEC11A, OXA1L
99	hsa01100	Metabolic pathways	KEGG	780	0.0168731	1.11056	0.00888234	0.0710587	up	10157, 10400, 10423, 10476, 10554, 10588, 10654, 10975, 11041, 112483, 1152, 125061, 126328, 1312, 1329, 1337, 1345, 1351, 1537, 1593, 1635, 1716, 191, 216, 217, 2224, 25796, 2628, 28, 29796, 2987, 3028, 3030, 30815, 30833, 326625, 3340, 353, 3615, 37, 3945, 4129, 4245, 435, 4357, 445, 4508, 4509, 4512, 4513, 4514, 4519, 4535, 4536, 4537, 4538, 4539, 4540, 4541, 4697, 4710, 4713, 4714, 4715, 4716…	0.0710587	ACSM3, AASS, H6PD, NDUFB4, MAOB, NDST1, HSD17B10, ACADVL, PLD1, HADHA, COMT, ATP5F1D, NDUFB7, PMM1, AHCY, NME3, CDIPT, ISYNA1, PON3, PTGDS, ALDH2, LDHB, CMAS, COX6A1, DGUOK, SRM, PRDX6, CHPF, PIGT, NT5C, UROD, ASL, UQCR11, MPST, DCTD, SAT1, PGLS, ASS1, PPT1, MGAT1, PEMT, ATP5MC2, CYP27A1, COX5B, MTHFS, DPM2, MMAB, NDUFB10, SAT2, GUK1, NDUFB9, TM7SF2, PFKM, ATP5PF, UQCRB, ATP5MC1, ST6GALNAC6, FDPS…
201	hsa05323	Rheumatoid arthritis	KEGG	31	0.0162924	1.10655	0.549849	0.875022	up	1514, 2353, 3725, 6387	0.840758	CXCL12, CTSL, FOS, JUN
226	hsa00650	Butanoate metabolism	KEGG	21	0.0129947	1.08411	0.699268	0.89289	up	3030, 6296	0.866887	ACSM3, HADHA
207	hsa05146	Amoebiasis	KEGG	51	0.0119776	1.07728	0.583253	0.875022	up	1277, 1278, 1284, 1289, 3908, 3911, 3915, 5269, 5566	0.840758	PRKACA, COL1A1, SERPINB6, COL5A1, LAMA5, COL4A2, LAMC1, COL1A2, LAMA2
218	hsa03320	PPAR signaling pathway	KEGG	34	0.011436	1.07366	0.668734	0.87943	up	1593, 1622, 3611, 6319	0.858695	SCD, CYP27A1, DBI, ILK
195	hsa04662	B cell receptor signaling pathway	KEGG	53	0.0108265	1.0696	0.615446	0.875022	up	207, 2353, 3725, 5530, 5605, 5894, 8519, 975	0.84404	CD81, MAP2K2, RAF1, PPP3CA, AKT1, FOS, JUN, IFITM1
228	hsa00310	Lysine degradation	KEGG	37	0.0097151	1.06224	0.707241	0.893157	up	10157, 217, 3030, 5351, 54904, 55870, 64324, 79709	0.866887	AASS, PLOD1, HADHA, ALDH2, ASH1L, COLGALT1, NSD3, NSD1
236	hsa00563	Glycosylphosphatidylinositol(GPI)-anchor biosynthesis	KEGG	23	0.00887806	1.05672	0.787069	0.926753	up	51604, 8733, 8818	0.910131	PIGT, DPM2, GPAA1
229	hsa05414	Dilated cardiomyopathy	KEGG	45	0.00858396	1.05479	0.716386	0.893157	up	3688, 3908, 4000, 5566, 60, 6443, 7169, 7171, 784	0.866887	PRKACA, ACTB, ITGB1, LMNA, SGCB, TPM4, CACNB3, LAMA2, TPM2
241	hsa05410	Hypertrophic cardiomyopathy (HCM)	KEGG	44	0.00622821	1.03946	0.796721	0.926753	up	3688, 3908, 4000, 60, 6443, 7169, 7171, 784	0.910131	ACTB, ITGB1, LMNA, SGCB, TPM4, CACNB3, LAMA2, TPM2
235	hsa04620	Toll-like receptor signaling pathway	KEGG	51	0.00563495	1.03564	0.802685	0.926753	up	207, 2353, 3654, 3725, 5605	0.910131	MAP2K2, AKT1, FOS, JUN, IRAK1
249	hsa00030	Pentose phosphate pathway	KEGG	23	0.00535058	1.03381	0.872987	0.963296	up	25796, 5213, 9563	0.952349	H6PD, PGLS, PFKM
248	hsa03020	RNA polymerase	KEGG	28	0.00503213	1.03177	0.86857	0.963296	up		0.952349
244	hsa04210	Apoptosis	KEGG	53	0.004659	1.02938	0.834037	0.946485	up	207, 23052, 3654, 54205, 5530, 5566, 5577, 581, 823, 8837	0.931018	CFLAR, PRKAR2B, CAPN1, PRKACA, BAX, PPP3CA, AKT1, ENDOD1, CYCS, IRAK1
253	hsa00071	Fatty acid degradation	KEGG	29	0.00368181	1.02314	0.902608	0.971719	up	217, 3030, 37	0.960711	ACADVL, HADHA, ALDH2
256	hsa04930	Type II diabetes mellitus	KEGG	30	0.00320244	1.0201	0.91401	0.971719	up	3643, 3667, 9021	0.960711	IRS1, INSR, SOCS3
260	hsa00240	Pyrimidine metabolism	KEGG	86	0.00133739	1.00835	0.940202	0.974822	up	1635, 30833, 4830, 4832, 54963, 57804	0.97134	NME3, NT5C, DCTD, POLD4, UCKL1, NME1
266	hsa00640	Propanoate metabolism	KEGG	26	0.000368853	1.00229	0.990882	0.99607	up	217, 3030, 3945, 8802	0.996415	HADHA, ALDH2, LDHB, SUCLG1
267	hsa04060	Cytokine-cytokine receptor interaction	KEGG	50	-0.000105203	0.999346	0.996415	0.996415	down	1232, 1436, 1438, 3597, 3815, 91	0.996415	IL13RA1, ACVR1B, KIT, CSF1R, CCR3, CSF2RA
265	hsa00620	Pyruvate metabolism	KEGG	31	-0.000578841	0.996409	0.984458	0.994821	down	160287, 223, 3029, 31, 38, 3948, 4200	0.996415	HAGH, ACAT1, ME2, ALDH9A1, LDHC, LDHAL6A, ACACA
262	hsa05220	Chronic myeloid leukemia	KEGG	55	-0.00104723	0.993513	0.962772	0.983256	down	1027, 1398, 1488, 1869, 5293, 5295, 5594, 5604, 9846	0.983256	GAB2, MAPK1, E2F1, CDKN1B, PIK3R1, CRK, MAP2K1, PIK3CD, CTBP2
261	hsa04960	Aldosterone-regulated sodium reabsorption	KEGG	23	-0.00242536	0.98504	0.944359	0.974822	down	23327, 4306, 481, 486, 5170, 5293, 5295, 5594	0.97134	NEDD4L, MAPK1, FXYD2, PDPK1, ATP1B1, PIK3R1, NR3C2, PIK3CD
251	hsa05218	Melanoma	KEGG	38	-0.00266839	0.983554	0.921643	0.971719	down	1869, 2259, 5293, 5295, 5594, 5604, 5728	0.961714	MAPK1, E2F1, FGF14, PIK3R1, MAP2K1, PIK3CD, PTEN
252	hsa04621	NOD-like receptor signaling pathway	KEGG	32	-0.00328919	0.979766	0.91158	0.971719	down	329, 3326, 5594, 5599, 7189	0.960711	HSP90AB1, MAPK1, MAPK8, BIRC2, TRAF6
254	hsa00280	Valine, leucine and isoleucine degradation	KEGG	36	-0.00372871	0.977094	0.894051	0.971719	down	223, 26275, 3157, 38, 5095, 64087	0.960711	ACAT1, HMGCS1, MCCC2, ALDH9A1, PCCA, HIBCH
250	hsa00010	Glycolysis / Gluconeogenesis	KEGG	35	-0.00429849	0.97364	0.879961	0.965443	down	160287, 223, 3948, 5214, 5230, 669, 83440	0.95274	PFKP, PGK1, ALDH9A1, ADPGK, LDHC, LDHAL6A, BPGM
246	hsa04150	mTOR signaling pathway	KEGG	43	-0.00446346	0.972643	0.862263	0.963296	down	1977, 2475, 253260, 3091, 5170, 51719, 5293, 5295, 5563, 5594, 57521	0.952349	MAPK1, HIF1A, CAB39, PDPK1, RPTOR, PIK3R1, EIF4E, PRKAA2, RICTOR, PIK3CD, MTOR
243	hsa04650	Natural killer cell mediated cytotoxicity	KEGG	57	-0.00502693	0.969243	0.822774	0.940313	down	10451, 2185, 2534, 3383, 4772, 4773, 4775, 5293, 5295, 5336, 5534, 5594, 5604, 5879, 5880	0.925621	FYN, NFATC3, ICAM1, MAPK1, NFATC2, PTK2B, RAC2, NFATC1, VAV3, RAC1, PIK3R1, MAP2K1, PIK3CD, PLCG2, PPP3R1
237	hsa04670	Leukocyte transendothelial migration	KEGG	64	-0.00590226	0.963984	0.781493	0.926753	down	10451, 1495, 1496, 1499, 2185, 2773, 3383, 3676, 4688, 51208, 5293, 5295, 5336, 5879, 5880, 5908, 7408, 7430, 83700, 87, 89, 9071, 998	0.910131	CTNNA1, GNAI3, CTNNA2, CLDN18, CDC42, ACTN1, ICAM1, EZR, ITGA4, NCF2, PTK2B, VASP, RAP1B, RAC2, VAV3, CLDN10, RAC1, PIK3R1, JAM3, CTNNB1, PIK3CD, PLCG2, ACTN3
231	hsa05145	Toxoplasmosis	KEGG	72	-0.00621774	0.962096	0.75721	0.914367	down	10105, 2773, 329, 4843, 5293, 5295, 5594, 5599, 6772, 6774, 7099, 7189, 8398	0.893756	NOS2, GNAI3, MAPK1, MAPK8, PPIF, BIRC2, STAT1, TLR4, PIK3R1, STAT3, PIK3CD, TRAF6, PLA2G6
238	hsa05130	Pathogenic Escherichia coli infection	KEGG	40	-0.00674463	0.958951	0.802247	0.926753	down	10971, 1499, 2534, 347688, 4691, 7099, 7277, 7430, 8440, 84790, 998	0.910131	FYN, CDC42, NCK2, EZR, NCL, TUBA4A, YWHAQ, TLR4, TUBA1C, CTNNB1, TUBB8
222	hsa04530	Tight junction	KEGG	93	-0.00743398	0.954852	0.676886	0.881903	down	10207, 1457, 1495, 1496, 1499, 2037, 22800, 22989, 23136, 2773, 3993, 51208, 5515, 5520, 5521, 5581, 5583, 5588, 5728, 60412, 64398, 7525, 83700, 84612, 87, 89, 9071, 9223, 9414, 998	0.858695	PRKCH, CTNNA1, GNAI3, PRKCQ, CTNNA2, CLDN18, CDC42, ACTN1, MPP5, LLGL2, EPB41L2, EPB41L3, CSNK2A1, PPP2CA, TJP2, PARD6B, EXOC4, PATJ, RRAS2, CLDN10, MYH15, MAGI1, PPP2R2B, JAM3, CTNNB1, PRKCE, PTEN, YES1, PPP2R2A, ACTN3
203	hsa04141	Protein processing in endoplasmic reticulum	KEGG	146	-0.00796529	0.951704	0.57941	0.875022	down	10483, 10802, 10808, 22824, 22926, 23471, 258010, 267, 29979, 3301, 3326, 51726, 55768, 55829, 55968, 5599, 5609, 56605, 5887, 6396, 6745, 7321, 7323, 7324, 7325, 7326, 7466, 79139, 84447, 8454, 9532, 9601, 9632	0.840758	CUL1, TRAM1, UBE2D1, MAP2K7, DNAJA1, ERO1B, NSFL1C, DNAJB11, HSP90AB1, SEC23B, MAPK8, UBE2D3, WFS1, BAG2, SEC24A, ATF6, RAD23B, HSPH1, SSR1, SELENOS, UBE2G1, UBQLN1, DERL1, NGLY1, PDIA4, SEC13, AMFR, SYVN1, HSPA4L, UBE2E1, SEC24C, UBE2E2, SVIP
232	hsa05223	Non-small cell lung cancer	KEGG	41	-0.00834536	0.949459	0.755382	0.914367	down	1869, 5170, 5293, 5295, 5336, 5594, 5604, 5915, 7039	0.893756	RARB, MAPK1, E2F1, PDPK1, PIK3R1, TGFA, MAP2K1, PIK3CD, PLCG2
196	hsa04722	Neurotrophin signaling pathway	KEGG	101	-0.00842603	0.948983	0.624364	0.875022	down	10971, 1398, 2932, 4916, 5293, 5295, 5336, 5594, 5598, 5599, 5604, 5609, 5663, 5664, 5879, 5908, 6272, 7189, 7529, 7532, 7533, 801, 805, 810, 815, 818, 9252, 998	0.848193	CAMK2A, CDC42, MAP2K7, PSEN1, GSK3B, MAPK1, RPS6KA5, MAPK8, RAP1B, YWHAH, SORT1, YWHAQ, RAC1, NTRK3, PSEN2, CALM2, PIK3R1, CAMK2G, MAPK7, YWHAB, CRK, MAP2K1, YWHAG, PIK3CD, TRAF6, CALML3, PLCG2, CALM1
191	hsa04010	MAPK signaling pathway	KEGG	167	-0.00856654	0.948155	0.525929	0.870503	down	10125, 11072, 11221, 1398, 1847, 1849, 2259, 22800, 25780, 4342, 4773, 5062, 51701, 5494, 5534, 55799, 5594, 5598, 5599, 5604, 5609, 56940, 5801, 5871, 5879, 5880, 5908, 5924, 7189, 775, 8398, 84867, 9252, 9254, 998	0.832239	CACNA2D2, CDC42, MAP2K7, NLK, MAPK1, PPM1A, RPS6KA5, NFATC2, FGF14, MAPK8, PTPN5, DUSP22, RASGRF2, RAP1B, RAC2, RRAS2, RAC1, DUSP5, DUSP10, CACNA1C, RASGRP3, PTPRR, CACNA2D3, DUSP7, MAPK7, CRK, MAP4K2, MAP2K1, RASGRP1, MOS, TRAF6, PAK2, PLA2G6, PPP3R1, DUSP14
224	hsa04912	GnRH signaling pathway	KEGG	59	-0.00875415	0.94705	0.696202	0.89289	down	109, 111, 115, 2185, 23236, 2767, 3710, 5594, 5598, 5599, 5604, 5609, 775, 801, 805, 810, 815, 818, 8398, 998	0.866887	CAMK2A, CDC42, MAP2K7, GNA11, ITPR3, MAPK1, MAPK8, PTK2B, ADCY3, CALM2, CAMK2G, CACNA1C, ADCY9, MAPK7, MAP2K1, ADCY5, CALML3, PLCB1, PLA2G6, CALM1
197	hsa04910	Insulin signaling pathway	KEGG	106	-0.00881771	0.946676	0.600434	0.875022	down	10580, 10891, 1398, 1977, 2475, 2932, 31, 3991, 5139, 51422, 5170, 5293, 5295, 5501, 5509, 5563, 5564, 5571, 5573, 5576, 5594, 5599, 5604, 57521, 5770, 801, 805, 810	0.840758	LIPE, GSK3B, SORBS1, MAPK1, PRKAG2, MAPK8, PRKAR1A, PPARGC1A, PRKAB1, PRKAR2A, PPP1R3D, PDPK1, RPTOR, CALM2, PIK3R1, EIF4E, PRKAA2, CRK, MAP2K1, PIK3CD, PDE3A, CALML3, PRKAG1, PPP1CC, PTPN1, CALM1, MTOR, ACACA
227	hsa04920	Adipocytokine signaling pathway	KEGG	47	-0.00925005	0.944136	0.712839	0.893157	down	10891, 2181, 2475, 51094, 51422, 5563, 5564, 5571, 5588, 5599, 6774, 79602, 948	0.866887	ADIPOR2, PRKCQ, PRKAG2, MAPK8, PPARGC1A, PRKAB1, ACSL3, CD36, ADIPOR1, PRKAA2, STAT3, PRKAG1, MTOR
230	hsa00510	N-Glycan biosynthesis	KEGG	42	-0.00944114	0.943015	0.72255	0.895029	down	11282, 11320, 146664, 2530, 57171, 79796, 79868, 91869	0.867059	FUT8, MGAT4A, ALG9, ALG13, MGAT4B, RFT1, DOLPP1, MGAT5B
214	hsa04630	Jak-STAT signaling pathway	KEGG	61	-0.00949863	0.942678	0.667604	0.87943	down	1438, 3597, 51588, 5293, 5295, 6772, 6774, 8554, 894, 9063	0.858695	PIAS1, PIAS2, PIAS4, STAT1, CCND2, IL13RA1, PIK3R1, STAT3, PIK3CD, CSF2RA
215	hsa05142	Chagas disease (American trypanosomiasis)	KEGG	61	-0.0102053	0.938548	0.645554	0.87943	down	1636, 23236, 2767, 2773, 4087, 4843, 5293, 5295, 5515, 5520, 5521, 5594, 5599, 7099, 7189, 9630	0.858695	NOS2, GNAI3, GNA11, MAPK1, MAPK8, PPP2CA, TLR4, PIK3R1, GNA14, PPP2R2B, ACE, PIK3CD, TRAF6, SMAD2, PLCB1, PPP2R2A
219	hsa05131	Shigellosis	KEGG	50	-0.0111511	0.933047	0.649897	0.87943	down	1398, 1793, 5217, 5594, 5599, 5879, 8936, 8945, 9474, 9844, 998	0.858695	ATG5, PFN2, CDC42, MAPK1, MAPK8, WASF1, RAC1, DOCK1, ELMO1, BTRC, CRK
198	hsa05215	Prostate cancer	KEGG	66	-0.0116259	0.930298	0.588056	0.875022	down	1017, 1027, 1499, 1869, 2475, 2932, 3326, 4824, 51176, 5170, 5293, 5295, 5594, 5604, 5728, 6932, 7039, 9586	0.840758	TCF7, GSK3B, HSP90AB1, MAPK1, E2F1, CDKN1B, CDK2, LEF1, PDPK1, PIK3R1, CREB5, TGFA, NKX3-1, CTNNB1, MAP2K1, PIK3CD, PTEN, MTOR
174	hsa00230	Purine metabolism	KEGG	115	-0.0121675	0.927172	0.45813	0.823051	down	100, 10621, 10622, 109, 111, 11128, 115, 159, 205, 2618, 26289, 5136, 5139, 5144, 54107, 5422, 5440, 5471, 5558, 5631, 6240, 6241, 8622	0.782377	ADSS, POLA1, PDE8B, POLR3G, PDE4D, PDE1A, PPAT, POLR3F, ADCY3, PRIM2, PRPS1, POLR2K, POLE3, POLR3A, AK5, GART, ADCY9, AK4, RRM1, RRM2, PDE3A, ADCY5, ADA, AC022414.1
199	hsa04146	Peroxisome	KEGG	58	-0.0122937	0.926445	0.59198	0.875022	down	11001, 2181, 3295, 3417, 3418, 4843, 5193, 55825, 5825, 5826, 5828, 6648	0.840758	NOS2, PEX12, PECR, ABCD3, ABCD4, ACSL3, HSD17B4, IDH1, SLC27A2, PEX2, IDH2, SOD2
204	hsa04350	TGF-beta signaling pathway	KEGG	52	-0.0124511	0.92554	0.607214	0.875022	down	3397, 4087, 5308, 5515, 5594, 64750, 654, 7027, 8454, 9372	0.840758	CUL1, MAPK1, SMURF2, PPP2CA, ID1, BMP6, ZFYVE9, PITX2, SMAD2, TFDP1
216	hsa04622	RIG-I-like receptor signaling pathway	KEGG	37	-0.0125119	0.92519	0.662506	0.87943	down	23586, 29110, 55593, 5599, 7187, 7189, 79132, 9474	0.858695	ATG5, OTUD5, DDX58, MAPK8, DHX58, TRAF3, TRAF6, TBK1
186	hsa04142	Lysosome	KEGG	96	-0.0126928	0.92415	0.479309	0.829075	down	10717, 10947, 1497, 1515, 164, 23163, 2517, 26985, 27074, 2720, 2799, 3074, 4864, 51606, 535, 55353, 57192, 6272, 8120, 8546, 8763, 9374	0.784324	ATP6V0A1, CTNS, ATP6V1H, HEXB, AP3M2, LAMP3, MCOLN1, AP3B2, LAPTM4B, GGA3, AP3B1, SORT1, AP4B1, CD164, GNS, CTSV, NPC1, AP1G1, GLB1, FUCA1, AP3M1, PPT2
194	hsa04660	T cell receptor signaling pathway	KEGG	66	-0.0126998	0.92411	0.555737	0.875022	down	10125, 10451, 1739, 2534, 2932, 4772, 4773, 4775, 5062, 5293, 5295, 5534, 5588, 5594, 5604, 5609, 8440, 998	0.840758	FYN, PRKCQ, CDC42, NCK2, NFATC3, DLG1, MAP2K7, GSK3B, MAPK1, NFATC2, NFATC1, VAV3, PIK3R1, MAP2K1, PIK3CD, RASGRP1, PAK2, PPP3R1
223	hsa00051	Fructose and mannose metabolism	KEGG	27	-0.013908	0.917197	0.679801	0.881903	down	5209, 5214, 8898, 9107, 9108	0.858695	MTMR7, PFKP, MTMR2, MTMR6, PFKFB3
176	hsa05160	Hepatitis C	KEGG	83	-0.0150482	0.910721	0.438859	0.823051	down	10197, 23586, 29110, 2932, 3659, 51208, 51588, 5293, 5295, 5515, 5520, 5521, 5594, 5599, 6772, 6774, 7187, 7189, 8554, 9063, 9071	0.782377	PIAS1, CLDN18, PIAS2, GSK3B, MAPK1, PIAS4, DDX58, MAPK8, PPP2CA, STAT1, IRF1, TRAF3, PSME3, CLDN10, PIK3R1, PPP2R2B, STAT3, PIK3CD, TRAF6, TBK1, PPP2R2A
200	hsa00520	Amino sugar and nucleotide sugar metabolism	KEGG	37	-0.0150944	0.91046	0.602157	0.875022	down	10007, 132789, 140838, 3074, 64841, 6675, 7360, 80146, 80896	0.840758	HEXB, GNPNAT1, GNPDA1, UXS1, UAP1, NPL, GNPDA2, UGP2, NANP
193	hsa04540	Gap junction	KEGG	52	-0.0152376	0.90965	0.533699	0.874286	down	109, 111, 115, 1453, 23236, 2767, 2773, 2915, 347688, 3710, 5592, 5594, 5598, 5604, 7277, 84790, 983	0.835355	GNAI3, GNA11, ITPR3, MAPK1, TUBA4A, ADCY3, CSNK1D, ADCY9, MAPK7, TUBA1C, GRM5, MAP2K1, CDK1, ADCY5, PLCB1, PRKG1, TUBB8
206	hsa05120	Epithelial cell signaling in Helicobacter pylori infection	KEGG	49	-0.0152763	0.909431	0.544635	0.875022	down	245973, 51382, 51606, 526, 528, 5336, 535, 5599, 5879, 83700, 9550, 998	0.840758	ATP6V0A1, ATP6V1H, CDC42, ATP6V1D, MAPK8, RAC1, ATP6V1G1, ATP6V1C2, ATP6V1B2, ATP6V1C1, JAM3, PLCG2
175	hsa04666	Fc gamma R-mediated phagocytosis	KEGG	73	-0.0153238	0.909162	0.459612	0.823051	down	10059, 10451, 1398, 1794, 2209, 26052, 3985, 4651, 5293, 5295, 5336, 5581, 5594, 5604, 5879, 5880, 7408, 8395, 8398, 8612, 8853, 8936, 9846, 998	0.782377	GAB2, CDC42, DNM1L, MAPK1, PIP5K1B, WASF1, VASP, RAC2, VAV3, DOCK2, RAC1, PLPP2, MYO10, PIK3R1, FCGR1A, ASAP2, CRK, MAP2K1, PRKCE, PIK3CD, LIMK2, PLA2G6, PLCG2, DNM3
220	hsa04623	Cytosolic DNA-sensing pathway	KEGG	24	-0.015427	0.908579	0.66767	0.87943	down	103, 10621, 10622, 11128, 23586, 29110	0.858695	DDX58, POLR3G, POLR3F, POLR3A, ADAR, TBK1
187	hsa00564	Glycerophospholipid metabolism	KEGG	53	-0.0166614	0.901636	0.494408	0.845949	down	10434, 129642, 1607, 23761, 54675, 79888, 8398, 8612, 8760, 9489, 9791	0.79994	PGS1, CRLS1, CDS2, LYPLA1, DGKB, PLPP2, MBOAT2, LPCAT1, PTDSS1, PLA2G6, PISD
178	hsa05221	Acute myeloid leukemia	KEGG	46	-0.0193797	0.886533	0.463017	0.823051	down	2475, 3728, 3815, 51176, 5293, 5295, 5594, 5604, 6774, 6932, 862	0.782377	RUNX1T1, TCF7, MAPK1, LEF1, PIK3R1, KIT, STAT3, MAP2K1, PIK3CD, JUP, MTOR
177	hsa05214	Glioma	KEGG	46	-0.0199571	0.883357	0.450709	0.823051	down	1869, 2475, 5293, 5295, 5336, 5594, 5604, 5728, 7039, 801, 805, 810, 815, 818	0.782377	CAMK2A, MAPK1, E2F1, CALM2, PIK3R1, CAMK2G, TGFA, MAP2K1, PIK3CD, PTEN, CALML3, PLCG2, CALM1, MTOR
212	hsa00250	Alanine, aspartate and glutamate metabolism	KEGG	24	-0.0208757	0.878329	0.568949	0.875022	down	159, 2571, 27165, 5471, 84706	0.840758	ADSS, PPAT, GAD1, GLS2, GPT2
170	hsa05222	Small cell lung cancer	KEGG	59	-0.0213933	0.875508	0.36297	0.73005	down	1017, 1027, 1163, 1869, 329, 4843, 51588, 5293, 5295, 5728, 5915, 6502, 7187, 7188, 7189, 8554, 9063	0.678801	NOS2, PIAS1, RARB, PIAS2, TRAF5, E2F1, PIAS4, BIRC2, CDKN1B, CDK2, TRAF3, SKP2, PIK3R1, PIK3CD, PTEN, CKS1B, TRAF6
173	hsa05211	Renal cell carcinoma	KEGG	53	-0.0214691	0.875096	0.386657	0.757533	down	1398, 2034, 2271, 3091, 5062, 5293, 5295, 5594, 5604, 5879, 5908, 7039, 8453, 998	0.704793	CDC42, FH, MAPK1, HIF1A, CUL2, EPAS1, RAP1B, RAC1, PIK3R1, TGFA, CRK, MAP2K1, PIK3CD, PAK2
189	hsa00600	Sphingolipid metabolism	KEGG	29	-0.0222292	0.870972	0.507094	0.854053	down	130367, 166929, 2720, 55512, 55627, 8612, 8879	0.81135	SMPD3, SMPD4, PLPP2, SGPP2, SGMS2, SGPL1, GLB1
145	hsa03040	Spliceosome	KEGG	126	-0.0226301	0.868804	0.164859	0.452184	down	10523, 10569, 10946, 10992, 11325, 11338, 1655, 1659, 1665, 22938, 24148, 26121, 3183, 3192, 4686, 5093, 51340, 51645, 51729, 56259, 56949, 6434, 8449, 84991, 8559, 8683, 9129, 9343, 9410, 9716	0.400681	AQR, SNRNP40, U2AF2, DHX8, XAB2, WBP11, CHERP, SF3B2, HNRNPC, SNW1, PRPF6, CRNKL1, PRPF31, DDX5, EFTUD2, DHX15, SRSF9, PRPF3, CTNNBL1, RBM17, TRA2B, NCBP1, PPIL1, HNRNPU, SLU7, PRPF18, PCBP1, SF3A3, DDX42, DHX16
164	hsa05100	Bacterial invasion of epithelial cells	KEGG	56	-0.0234946	0.864149	0.333562	0.707356	down	10059, 1398, 1495, 1496, 1499, 1793, 26052, 26084, 5293, 5295, 5879, 79658, 8936, 9844, 998	0.659561	CTNNA1, CTNNA2, CDC42, ARHGAP10, DNM1L, WASF1, ARHGEF26, RAC1, PIK3R1, DOCK1, ELMO1, CRK, CTNNB1, PIK3CD, DNM3
163	hsa05210	Colorectal cancer	KEGG	53	-0.0239058	0.861944	0.338941	0.707356	down	1499, 1630, 26060, 2932, 4087, 4436, 4437, 51176, 5293, 5295, 5594, 5599, 5604, 5879, 5880, 6932	0.659561	TCF7, GSK3B, MSH2, MAPK1, MAPK8, MSH3, RAC2, RAC1, LEF1, PIK3R1, APPL1, CTNNB1, MAP2K1, PIK3CD, SMAD2, DCC
180	hsa00561	Glycerolipid metabolism	KEGG	31	-0.0243865	0.859373	0.455073	0.823051	down	129642, 1607, 223, 55750, 8612	0.782377	AGK, DGKB, PLPP2, ALDH9A1, MBOAT2
185	hsa00270	Cysteine and methionine metabolism	KEGG	26	-0.025575	0.853049	0.474401	0.828045	down	160287, 1786, 1788, 1789, 262, 27430, 3948, 51074	0.784324	MAT2B, DNMT3B, DNMT3A, AMD1, DNMT1, APIP, LDHC, LDHAL6A
130	hsa04144	Endocytosis	KEGG	142	-0.0259923	0.850839	0.0945446	0.330046	down	10015, 10059, 116987, 137492, 1436, 161, 163, 2066, 22905, 23327, 25978, 26052, 26119, 26286, 30011, 3815, 4087, 51100, 51534, 55048, 57403, 5869, 5878, 60682, 6455, 6456, 64744, 64750, 7189, 7251, 79720, 8395, 8411, 84440, 84612, 8766, 8853, 9135, 9372, 9525, 9815, 9922, 998	0.302543	AP2B1, VTA1, RABEP1, NEDD4L, CDC42, EPN2, TSG101, CHMP2B, SMAP2, DNM1L, SH3GLB1, EEA1, RAB11A, PIP5K1B, SH3GL2, RAB5C, SMURF2, RAB5B, SMAP1, VPS4B, PARD6B, RAB22A, RAB11FIP4, GIT2, VPS37B, SH3GL1, IQSEC1, SH3KBP1, ASAP2, VPS37A, ZFYVE9, KIT, LDLRAP1, AGAP1, VPS37C, PDCD6IP, TRAF6, SMAD2, ERBB4, CSF1R, AP2A2, DNM3, ARFGAP3
132	hsa04810	Regulation of actin cytoskeleton	KEGG	131	-0.0268178	0.846485	0.0979434	0.333987	down	10451, 10458, 1398, 1730, 1793, 2259, 22800, 22801, 23191, 26230, 26999, 3676, 3985, 4342, 5062, 5217, 5293, 5295, 5305, 5501, 55740, 5594, 5604, 5879, 5880, 7074, 7430, 79837, 81624, 8395, 87, 8826, 8874, 89, 8936, 998	0.303786	CYFIP2, PFN2, CDC42, ACTN1, EZR, MAPK1, FGF14, ARHGEF7, PIP5K1B, WASF1, ITGA4, RAC2, RRAS2, VAV3, RAC1, ITGA11, DIAPH3, IQGAP1, PIK3R1, TIAM2, DIAPH2, DOCK1, PIP4K2A, ENAH, TIAM1, PIP4K2C, CRK, MAP2K1, PIK3CD, MOS, BAIAP2, PAK2, LIMK2, PPP1CC, ACTN3, CYFIP1
112	hsa05200	Pathways in cancer	KEGG	207	-0.0287948	0.836149	0.0278993	0.14105	down	1017, 1027, 10342, 1163, 1398, 1436, 1438, 1488, 1495, 1496, 1499, 1613, 1630, 1869, 2034, 2259, 2271, 2475, 26060, 2932, 3091, 329, 3326, 3728, 3815, 4087, 4436, 4437, 4824, 4843, 51176, 51588, 5293, 5295, 5336, 5594, 5599, 5604, 5728, 5879, 5880, 5888, 5898, 5899, 5915, 6502, 675, 6772, 6774, 6932, 7039, 7187, 7188, 7189, 8030, 8031, 8453, 8554, 862, 9063, 998	0.129675	RALA, NOS2, PIAS1, CTNNA1, RAD51, CTNNA2, CDC42, RARB, PIAS2, RUNX1T1, TCF7, TRAF5, GSK3B, FH, MSH2, HSP90AB1, MAPK1, HIF1A, E2F1, FGF14, PIAS4, MAPK8, CCDC6, CUL2, BIRC2, CDKN1B, MSH3, TFG, STAT1, EPAS1, CDK2, RAC2, TRAF3, RAC1, LEF1, BRCA2, RALB, SKP2, PIK3R1, KIT, APPL1, TGFA, NKX3-1, CRK, DAPK3, CTNNB1, STAT3, MAP2K1, PIK3CD, PTEN, CKS1B, JUP, CTBP2, TRAF6, SMAD2, CSF1R, DCC, PLCG2, CSF2RA, M…
166	hsa04970	Salivary secretion	KEGG	37	-0.0291213	0.834454	0.337047	0.707356	down	109, 111, 115, 23236, 3710, 481, 486, 5592, 801, 805, 810, 952	0.659561	CD38, ITPR3, FXYD2, ADCY3, ATP1B1, CALM2, ADCY9, ADCY5, CALML3, PLCB1, PRKG1, CALM1
172	hsa04130	SNARE interactions in vesicular transport	KEGG	30	-0.0303482	0.828116	0.368827	0.73005	down	10228, 143187, 2054, 662, 6809, 6845, 9341, 9554, 9570	0.680912	VAMP3, GOSR2, STX2, BNIP1, VAMP7, STX6, VTI1A, STX3, SEC22B
165	hsa05014	Amyotrophic lateral sclerosis (ALS)	KEGG	34	-0.0306383	0.826624	0.334782	0.707356	down	2890, 2904, 4741, 4747, 5534, 5879, 79139	0.659561	NEFM, RAC1, DERL1, GRIA1, PPP3R1, GRIN2B, NEFL
146	hsa03018	RNA degradation	KEGG	63	-0.0324917	0.817158	0.167557	0.452621	down	10200, 11044, 1656, 167227, 219988, 23019, 23644, 246175, 29883, 3313, 4848, 4849, 4850, 5073, 5393, 80153, 84186, 9337	0.400681	EDC4, CNOT4, CNOT3, DDX6, CNOT2, TENT4A, HSPA9, EXOSC9, CNOT1, MPHOSPH6, CNOT6L, PARN, ZCCHC7, CNOT8, PATL1, DCP2, EDC3, CNOT7
158	hsa05110	Vibrio cholerae infection	KEGG	44	-0.0332054	0.813541	0.238199	0.551015	down	109, 11014, 115, 245973, 375, 51382, 51606, 526, 528, 5336, 535, 9414, 9550, 9601	0.504422	ATP6V0A1, ATP6V1H, ATP6V1D, TJP2, KDELR2, ATP6V1G1, ADCY3, ARF1, ATP6V1C2, ATP6V1B2, ATP6V1C1, PDIA4, ADCY9, PLCG2
139	hsa04012	ErbB signaling pathway	KEGG	64	-0.0349888	0.804574	0.136717	0.410151	down	1027, 1398, 145957, 2066, 2475, 2932, 5062, 5293, 5295, 5336, 5594, 5599, 5604, 5609, 7039, 815, 818, 8440	0.364578	CAMK2A, NCK2, MAP2K7, GSK3B, MAPK1, MAPK8, CDKN1B, PIK3R1, CAMK2G, TGFA, CRK, MAP2K1, NRG4, PIK3CD, ERBB4, PAK2, PLCG2, MTOR
150	hsa04370	VEGF signaling pathway	KEGG	49	-0.0350694	0.804172	0.191026	0.48429	down	4772, 4773, 4775, 5293, 5295, 5336, 5534, 5594, 5604, 5879, 5880, 8398, 998	0.430273	CDC42, NFATC3, MAPK1, NFATC2, RAC2, NFATC1, RAC1, PIK3R1, MAP2K1, PIK3CD, PLA2G6, PLCG2, PPP3R1
154	hsa04664	Fc epsilon RI signaling pathway	KEGG	45	-0.0355088	0.801978	0.204765	0.497658	down	10451, 2534, 5293, 5295, 5336, 5581, 5594, 5599, 5604, 5609, 5879, 5880, 8398, 9846	0.446761	FYN, GAB2, MAP2K7, MAPK1, MAPK8, RAC2, VAV3, RAC1, PIK3R1, MAP2K1, PRKCE, PIK3CD, PLA2G6, PLCG2
151	hsa05213	Endometrial cancer	KEGG	44	-0.0368768	0.795189	0.194221	0.48429	down	1495, 1496, 1499, 2932, 51176, 5170, 5293, 5295, 5594, 5604, 5728, 6932	0.430273	CTNNA1, CTNNA2, TCF7, GSK3B, MAPK1, LEF1, PDPK1, PIK3R1, CTNNB1, MAP2K1, PIK3CD, PTEN
143	hsa05212	Pancreatic cancer	KEGG	52	-0.0369622	0.794768	0.157754	0.445423	down	1869, 4087, 5293, 5295, 5594, 5599, 5604, 5879, 5880, 5888, 5898, 5899, 675, 6772, 6774, 7039, 998	0.398537	RALA, RAD51, CDC42, MAPK1, E2F1, MAPK8, STAT1, RAC2, RAC1, BRCA2, RALB, PIK3R1, TGFA, STAT3, MAP2K1, PIK3CD, SMAD2
168	hsa05217	Basal cell carcinoma	KEGG	22	-0.0372602	0.793297	0.35259	0.727928	down	1499, 2932, 51176, 6932	0.676973	TCF7, GSK3B, LEF1, CTNNB1
131	hsa03008	Ribosome biogenesis in eukaryotes	KEGG	69	-0.0376017	0.791615	0.0991523	0.333987	down	10199, 10813, 1457, 166378, 1736, 23560, 26354, 28987, 29889, 51068, 55127, 55131, 55226, 55916, 5901, 79631, 83732, 84916	0.303786	CSNK2A1, NXT2, RBM28, GTPBP4, HEATR1, MPHOSPH10, RIOK1, DKC1, RAN, GNL2, NAT10, EFL1, UTP4, NOB1, SPATA5, UTP14A, GNL3, NMD3
115	hsa04062	Chemokine signaling pathway	KEGG	99	-0.0391957	0.783812	0.0410972	0.194338	down	10451, 109, 111, 115, 1232, 1398, 1794, 2185, 23236, 26230, 2773, 2931, 2932, 5293, 5295, 54331, 5594, 5604, 57580, 5879, 5880, 5908, 6772, 6774, 7074, 9844, 998	0.175761	GNAI3, CDC42, GSK3B, MAPK1, GSK3A, STAT1, PTK2B, PREX1, RAP1B, RAC2, VAV3, DOCK2, RAC1, ADCY3, PIK3R1, TIAM2, ELMO1, TIAM1, ADCY9, CRK, STAT3, MAP2K1, PIK3CD, ADCY5, PLCB1, CCR3, GNG2
105	hsa03013	RNA transport	KEGG	137	-0.0394848	0.782405	0.0161537	0.103384	down	10289, 10460, 10605, 10762, 11218, 11260, 129401, 1964, 1967, 1977, 1982, 23636, 4686, 4927, 51068, 51095, 53371, 55706, 55746, 55916, 57122, 57510, 5901, 60528, 6396, 6606, 7329, 79902, 8021, 81929, 8480, 8669, 8672, 96764, 9688, 9818, 9972	0.0969221	ELAC2, TACC3, NDC1, DDX20, NUP133, TRNT1, EIF4G3, SEH1L, NUP50, RAE1, NXT2, NUP93, UBE2I, EIF3J, NUP88, EIF4G2, EIF2B1, NUP107, EIF1B, XPO5, NUP153, NUP85, NUP214, RAN, NCBP1, TGS1, NUP54, NUP58, EIF4E, SEC13, NUP35, NMD3, SMN1, PAIP1, EIF1AX, XPOT, NUP62
140	hsa00562	Inositol phosphate metabolism	KEGG	47	-0.0407266	0.776391	0.141929	0.419236	down	23236, 27124, 3612, 3705, 4952, 5289, 5293, 5298, 5305, 5336, 5728, 79837, 8395, 8871	0.371595	PIK3C3, SYNJ2, ITPK1, PIP5K1B, OCRL, IMPA1, PI4KB, PIP4K2A, PIP4K2C, PIK3CD, PTEN, PLCB1, INPP5J, PLCG2
135	hsa04720	Long-term potentiation	KEGG	49	-0.0421291	0.769653	0.122028	0.390489	down	23236, 2890, 2904, 2915, 3710, 5501, 5534, 5594, 5604, 5908, 775, 801, 805, 810, 815, 818	0.350372	CAMK2A, ITPR3, MAPK1, RAP1B, CALM2, CAMK2G, CACNA1C, GRIA1, GRM5, MAP2K1, CALML3, PLCB1, PPP1CC, CALM1, PPP3R1, GRIN2B
155	hsa03440	Homologous recombination	KEGG	26	-0.046345	0.74975	0.217142	0.52114	down	10111, 146956, 25788, 5888, 5889, 5890, 6117, 6118, 641, 675, 7516, 8438	0.466693	RAD51, RAD54L, RAD51C, RAD50, RPA2, RPA1, BRCA2, EME1, RAD51B, XRCC2, RAD54B, BLM
116	hsa03015	mRNA surveillance pathway	KEGG	72	-0.0463541	0.749707	0.0414992	0.194338	down	10767, 11051, 11052, 1477, 26528, 2935, 29894, 390748, 4686, 51692, 5515, 5520, 5521, 5525, 55916, 81608	0.175761	PPP2R5A, DAZAP1, CPSF1, CSTF1, NXT2, GSPT1, CPSF6, HBS1L, PPP2CA, CPSF3, NCBP1, FIP1L1, PPP2R2B, NUDT21, PABPN1L, PPP2R2A
127	hsa04115	p53 signaling pathway	KEGG	49	-0.0484529	0.739992	0.0786738	0.287809	down	1017, 1111, 27244, 3732, 51512, 5728, 6241, 64326, 64393, 6477, 83667, 8493, 891, 894, 901, 9133, 9538, 983	0.257478	GTSE1, SESN1, CD82, CCND2, CDK2, SESN2, CCNB1, CCNG2, COP1, EI24, CHEK1, CCNB2, CDK1, PPM1D, RRM2, PTEN, ZMAT3, SIAH1
133	hsa04730	Long-term depression	KEGG	40	-0.0492886	0.736159	0.105955	0.350749	down	23236, 2767, 2773, 2890, 2895, 2915, 3710, 5515, 5592, 5594, 5604, 8398	0.317866	GNAI3, GNA11, ITPR3, MAPK1, PPP2CA, GRID2, GRIA1, GRM5, MAP2K1, PLCB1, PLA2G6, PRKG1
122	hsa04916	Melanogenesis	KEGG	53	-0.0502893	0.731595	0.0585687	0.243568	down	109, 111, 115, 1499, 1638, 23236, 2773, 2932, 3815, 51176, 5594, 5604, 6932, 801, 805, 810, 815, 818	0.220148	GNAI3, CAMK2A, DCT, TCF7, GSK3B, MAPK1, ADCY3, LEF1, CALM2, CAMK2G, KIT, ADCY9, CTNNB1, MAP2K1, ADCY5, CALML3, PLCB1, CALM1
107	hsa04020	Calcium signaling pathway	KEGG	81	-0.0508478	0.72906	0.0187374	0.112424	down	109, 1139, 115, 2066, 2185, 23236, 2767, 2915, 292, 2925, 3274, 3710, 4843, 5136, 5336, 5481, 5534, 6546, 6870, 7416, 775, 801, 805, 810, 815, 818, 83447, 952, 9630	0.103776	CD38, SLC25A5, NOS2, CAMK2A, GNA11, ITPR3, HRH2, PDE1A, PTK2B, GRPR, ADCY3, CALM2, CAMK2G, CACNA1C, SLC25A31, GNA14, ADCY9, GRM5, TACR3, PPID, CHRNA7, CALML3, ERBB4, PLCB1, SLC8A1, PLCG2, CALM1, VDAC1, PPP3R1
137	hsa04962	Vasopressin-regulated water reabsorption	KEGG	33	-0.0513948	0.726586	0.126371	0.391814	down	109, 115, 140735, 1639, 4905, 51143, 51164, 51626, 5869, 5878, 79659, 8766, 9586	0.350372	NSF, RAB11A, RAB5C, RAB5B, DCTN4, ADCY3, DYNC2LI1, DYNC1LI1, CREB5, ADCY9, DYNC2H1, DCTN1, DYNLL2
123	hsa05412	Arrhythmogenic right ventricular cardiomyopathy (ARVC)	KEGG	45	-0.051863	0.724475	0.0724998	0.284081	down	1495, 1496, 1499, 1756, 22801, 3676, 3728, 51176, 55799, 6546, 6932, 775, 87, 89, 9254	0.253968	CACNA2D2, CTNNA1, CTNNA2, ACTN1, TCF7, ITGA4, ITGA11, LEF1, CACNA1C, CACNA2D3, CTNNB1, JUP, SLC8A1, DMD, ACTN3
136	hsa04976	Bile secretion	KEGG	30	-0.0540356	0.714759	0.126523	0.391814	down	10257, 109, 111, 115, 2052, 28234, 3781, 481, 486, 5244, 64241	0.350372	ABCB4, KCNN2, SLCO1B3, ABCC4, FXYD2, ADCY3, ATP1B1, EPHX1, ABCG8, ADCY9, ADCY5
113	hsa04520	Adherens junction	KEGG	62	-0.0544473	0.712933	0.0279161	0.14105	down	10458, 10580, 1457, 1495, 1496, 1499, 2534, 4008, 4087, 51176, 51701, 5594, 5770, 5879, 5880, 6615, 6932, 7525, 87, 8826, 89, 8936, 998	0.129675	FYN, CTNNA1, CTNNA2, CDC42, ACTN1, TCF7, NLK, SORBS1, MAPK1, CSNK2A1, WASF1, SNAI1, RAC2, LMO7, RAC1, LEF1, IQGAP1, CTNNB1, SMAD2, BAIAP2, YES1, PTPN1, ACTN3
101	hsa04360	Axon guidance	KEGG	80	-0.0545053	0.712676	0.0127367	0.0873373	down	10154, 1020, 1630, 1944, 2046, 2534, 27289, 2773, 2932, 3985, 4772, 4773, 4775, 5062, 5534, 5594, 57522, 5879, 5880, 6586, 8440, 8633, 9037, 9723, 998	0.0833674	FYN, GNAI3, CDC42, EPHA8, NCK2, NFATC3, GSK3B, MAPK1, NFATC2, SEMA5A, RAC2, NFATC1, PLXNC1, RAC1, EFNA3, CDK5, SEMA3E, RND1, PAK2, UNC5C, LIMK2, SLIT3, DCC, SRGAP1, PPP3R1
97	hsa04310	Wnt signaling pathway	KEGG	96	-0.0577685	0.698368	0.00409118	0.0357048	down	1457, 1488, 1499, 23002, 23236, 23401, 23500, 2932, 4087, 4772, 4773, 4775, 51176, 51701, 5515, 5525, 5534, 5599, 5663, 5879, 5880, 6477, 6932, 79718, 815, 818, 8454, 894, 8945	0.0346547	CUL1, PPP2R5A, CAMK2A, NFATC3, PSEN1, TCF7, GSK3B, NLK, DAAM1, NFATC2, CSNK2A1, MAPK8, PPP2CA, CCND2, RAC2, NFATC1, RAC1, LEF1, DAAM2, CAMK2G, BTRC, CTNNB1, CTBP2, SMAD2, TBL1XR1, FRAT2, PLCB1, SIAH1, PPP3R1
102	hsa04070	Phosphatidylinositol signaling system	KEGG	61	-0.0629627	0.676185	0.0124172	0.0873373	down	1607, 23236, 27124, 3612, 3705, 3710, 4952, 5289, 5293, 5295, 5298, 5305, 5336, 5728, 79837, 801, 805, 810, 8395, 8760, 8871	0.0833674	PIK3C3, SYNJ2, ITPR3, ITPK1, CDS2, PIP5K1B, OCRL, IMPA1, DGKB, PI4KB, CALM2, PIK3R1, PIP4K2A, PIP4K2C, PIK3CD, PTEN, CALML3, PLCB1, INPP5J, PLCG2, CALM1
124	hsa04330	Notch signaling pathway	KEGG	30	-0.0642764	0.670687	0.0716365	0.284081	down	113878, 1488, 182, 22938, 23385, 5663, 5664, 8650	0.253968	PSEN1, DTX2, SNW1, JAG1, NUMB, PSEN2, NCSTN, CTBP2
114	hsa00970	Aminoacyl-tRNA biosynthesis	KEGG	39	-0.0647237	0.668825	0.0390903	0.192445	down	10667, 123263, 123283, 2058, 2617, 4141, 4677, 57038, 5917, 6897, 7453, 79731	0.175761	MTFMT, GARS, TARS, RARS, NARS, EPRS, NARS2, WARS, FARS2, RARS2, MARS, TARSL2
118	hsa04971	Gastric acid secretion	KEGG	34	-0.0649195	0.668012	0.0530505	0.23371	down	109, 111, 115, 23236, 2773, 3274, 3710, 481, 7430, 801, 805, 810, 815, 818	0.212202	GNAI3, CAMK2A, EZR, ITPR3, HRH2, ADCY3, ATP1B1, CALM2, CAMK2G, ADCY9, ADCY5, CALML3, PLCB1, CALM1
126	hsa00020	Citrate cycle (TCA cycle)	KEGG	27	-0.0668078	0.660219	0.0758376	0.285506	down	1431, 2271, 3417, 3418, 3419, 47, 48, 4967, 6389	0.253968	CS, SDHA, FH, OGDH, ACO1, ACLY, IDH1, IDH3A, IDH2
121	hsa05216	Thyroid cancer	KEGG	25	-0.0742146	0.630517	0.0580122	0.243568	down	10342, 1499, 51176, 5594, 5604, 6932, 8030, 8031	0.220148	TCF7, MAPK1, CCDC6, TFG, LEF1, CTNNB1, MAP2K1, NCOA4
106	hsa03420	Nucleotide excision repair	KEGG	38	-0.0754015	0.625884	0.0180299	0.111669	down	1022, 1642, 2071, 2965, 3978, 5111, 54107, 5887, 5983, 5985, 6117, 6118, 8451, 902	0.103776	LIG1, GTF2H1, RFC5, RPA2, RAD23B, RPA1, PCNA, RFC3, CDK7, CCNH, CUL4A, POLE3, ERCC3, DDB1
100	hsa04972	Pancreatic secretion	KEGG	42	-0.0779314	0.61612	0.0102778	0.0789331	down	10136, 109, 111, 115, 23236, 3710, 481, 486, 5874, 5879, 5908, 8398, 8766, 952, 9545	0.0778945	CD38, RAB27B, ITPR3, RAB11A, RAB3D, RAP1B, RAC1, FXYD2, ADCY3, CELA3A, ATP1B1, ADCY9, ADCY5, PLCB1, PLA2G6
111	hsa03410	Base excision repair	KEGG	31	-0.0784666	0.614074	0.0258827	0.139654	down	142, 3978, 5111, 54107, 5423, 55247, 7374, 8930	0.129675	POLB, UNG, LIG1, NEIL3, MBD4, PCNA, PARP1, POLE3
117	hsa04740	Olfactory transduction	KEGG	23	-0.0806161	0.605926	0.0479488	0.219195	down	109, 219865, 26648, 2978, 390059, 4994, 5592, 801, 805, 810, 815, 818	0.197275	GUCA1A, CAMK2A, ADCY3, CALM2, CAMK2G, CALML3, OR3A1, OR51M1, PRKG1, CALM1, OR7E24, OR8G5
84	hsa04120	Ubiquitin mediated proteolysis	KEGG	121	-0.0855577	0.587601	3.27176e-06	6.97975e-05	down	10054, 10055, 11060, 11065, 1642, 23327, 329, 4281, 4591, 51434, 51588, 55070, 55120, 55284, 55294, 63893, 64326, 64750, 6477, 6502, 65264, 672, 7189, 7319, 7321, 7323, 7324, 7325, 7326, 7328, 7329, 7334, 8065, 84447, 8451, 8452, 8453, 8454, 8554, 8697, 8945, 9063, 92912, 9320, 991	5.23481e-05	BRCA1, PIAS1, CUL3, NEDD4L, CUL1, UBE2D1, UBE2A, PIAS2, CDC23, MID1, UBE2I, UBE2W, PIAS4, CUL2, TRIM37, SMURF2, UBE2D3, FBXW7, BIRC2, FANCL, CDC20, UBA2, UBE2G1, CUL4A, UBE2Q2, DET1, SAE1, COP1, SKP2, TRIP12, UBE2Z, SYVN1, BTRC, CUL5, DDB1, UBE2E1, UBE2C, TRAF6, UBE2O, UBE2N, UBE2E2, UBE2H, SIAH1, ANAPC7, WWP2
103	hsa03022	Basal transcription factors	KEGG	30	-0.0892863	0.574142	0.0122728	0.0873373	down	11036, 27097, 2958, 2959, 2960, 2965, 387332, 51616, 6875, 6877, 6908, 9519	0.0833674	TBPL1, GTF2H1, TBP, TAF5L, GTF2B, GTF2A2, TAF4B, TAF5, GTF2E1, TBPL2, TAF9B, GTF2A1L
86	hsa04914	Progesterone-mediated oocyte maturation	KEGG	71	-0.0924585	0.562934	8.59933e-05	0.00137589	down	1017, 109, 111, 115, 2773, 3326, 387778, 4085, 4342, 5139, 51434, 5293, 5295, 5347, 5594, 5599, 5604, 64506, 699, 8379, 8697, 890, 891, 9133, 983, 993	0.00103192	MAD1L1, GNAI3, CDC23, HSP90AB1, MAPK1, MAPK8, CDK2, CCNB1, ADCY3, CCNA2, PIK3R1, CCNB2, ADCY9, CDC25A, MAD2L1, PLK1, MAP2K1, BUB1, CDK1, PIK3CD, PDE3A, MOS, ADCY5, ANAPC7, SPDYC, CPEB1
92	hsa04080	Neuroactive ligand-receptor interaction	KEGG	41	-0.0927811	0.561806	0.00241352	0.0272586	down	1136, 1138, 1139, 2567, 2568, 2742, 2890, 2895, 2898, 2900, 2904, 2915, 2925, 3274, 5746, 6870, 7068, 9568	0.0231551	CHRNA3, GABRP, GLRA2, HRH2, GRPR, GABBR2, PTH2R, GRIK4, THRB, GRID2, GRIA1, GRIK2, GRM5, CHRNA5, TACR3, CHRNA7, GABRG3, GRIN2B
110	hsa04640	Hematopoietic cell lineage	KEGG	20	-0.0961794	0.550066	0.0261852	0.139654	down	1436, 1438, 2209, 3676, 3815, 948, 952, 966	0.129675	CD38, CD59, ITGA4, CD36, FCGR1A, KIT, CSF1R, CSF2RA
108	hsa03430	Mismatch repair	KEGG	21	-0.0973584	0.54605	0.0210216	0.122308	down	3978, 4436, 4437, 5111, 5983, 5985, 6117, 6118	0.112115	MSH2, LIG1, RFC5, MSH3, RPA2, RPA1, PCNA, RFC3
93	hsa03030	DNA replication	KEGG	35	-0.0990571	0.540316	0.00257279	0.0274431	down	1763, 246243, 3978, 4171, 4172, 4173, 5111, 54107, 5422, 5558, 5983, 5985, 6117, 6118	0.0231551	MCM2, POLA1, MCM4, LIG1, RFC5, MCM3, RPA2, RPA1, PCNA, RFC3, DNA2, PRIM2, POLE3, RNASEH1
104	hsa04710	Circadian rhythm	KEGG	20	-0.104925	0.520966	0.0143958	0.0953098	down	1407, 1453, 406, 4862, 8454, 8863, 8945, 9572, 9575	0.09013	CRY1, PER3, CUL1, NR1D1, ARNTL, CLOCK, CSNK1D, BTRC, NPAS2
81	hsa04114	Oocyte meiosis	KEGG	90	-0.109371	0.506769	1.7924e-07	5.73568e-06	down	1017, 109, 10971, 111, 115, 3710, 387778, 4085, 4342, 51434, 5347, 5501, 5515, 5525, 5534, 5594, 5604, 64506, 6790, 699, 7529, 7532, 7533, 801, 805, 810, 815, 818, 8243, 8454, 8697, 891, 8945, 9133, 9232, 9700, 983, 991	4.30176e-06	CUL1, PPP2R5A, CAMK2A, SMC1A, AURKA, CDC23, ITPR3, MAPK1, PPP2CA, CDC20, CDK2, YWHAH, CCNB1, YWHAQ, ESPL1, ADCY3, CALM2, CAMK2G, CCNB2, ADCY9, MAD2L1, PTTG1, BTRC, PLK1, YWHAB, MAP2K1, BUB1, YWHAG, CDK1, MOS, ADCY5, CALML3, PPP1CC, ANAPC7, CALM1, SPDYC, CPEB1, PPP3R1
79	hsa04110	Cell cycle	KEGG	103	-0.127842	0.451812	6.39159e-11	3.06796e-09	down	1017, 1022, 1027, 10971, 1111, 1869, 23594, 2932, 4085, 4087, 4171, 4172, 4173, 494551, 4998, 4999, 5000, 5001, 5111, 51434, 5347, 6502, 699, 701, 7027, 7272, 7529, 7532, 7533, 7709, 8243, 8317, 8318, 8379, 8454, 8697, 890, 891, 894, 902, 9133, 9184, 9232, 9700, 983, 990, 991, 993	2.30097e-09	MAD1L1, CUL1, SMC1A, MCM2, GSK3B, ORC1, ORC6, CDC45, CDC6, CDC23, CDC7, E2F1, MCM4, CDKN1B, MCM3, TTK, ORC2, ORC4, ZBTB17, CDC20, CCND2, CDK2, YWHAH, PCNA, CCNB1, CDK7, YWHAQ, CCNH, ESPL1, CCNA2, SKP2, CHEK1, BUB3, BUB1B, CCNB2, CDC25A, MAD2L1, PTTG1, ORC5, PLK1, YWHAB, BUB1, YWHAG, CDK1, SMAD2, ANAPC7, TFDP1, WEE2

## Sheet: GOCC
	Id	Name	ConceptType	#Genes	Coeff	OddsRatio	P-Value	FDR	Direction	SigGenes	FDR2	SigGenes_external_name
268	GO:0022626	cytosolic ribosome	GOCC	100	0.1814	3.0874	3.62383e-77	1.21761e-74	up	11224, 1939, 23521, 25873, 3921, 4736, 6122, 6124, 6125, 6128, 6129, 6130, 6133, 6134, 6135, 6137, 6138, 6139, 6141, 6142, 6143, 6144, 6146, 6147, 6152, 6154, 6155, 6156, 6157, 6158, 6159, 6160, 6161, 6164, 6165, 6166, 6167, 6168, 6169, 6170, 6171, 6173, 6175, 6176, 6181, 6187, 6188, 6189, 6191, 6193, 6194, 6201, 6202, 6203, 6204, 6205, 6206, 6207, 6208, 6209, 6210, 6217, 6218, 6222, 6223, 6224, …	8.04491e-75	RPS20, RPL18, RPL31, RPS5, RPL6, RPLP0, RPL3, RPS16, RPS19, RPL18A, RPL28, RPL19, RPL34, RPS13, RPS12, RPL24, RPS15, RPL22, RPS25, RPL21, RPL5, RPS10, RPL23, RPL36, RPL27, RPS15A, RPL35, RPS6, RPLP1, RPS24, RPS2, RPS11, RPL13A, RPL11, RPS8, EIF2D, RPS27A, RPL32, RPS3A, RPL37, RPL10, RPL7, RPL7A, RPS3, RPL30, RPL26, RPL29, RPL9, RPS14, RPL36AL, RPL27A, RPL13, RPSA, RPS9, RPS21, RPS7, RPL38, RPL4, …
273	GO:0022625	cytosolic large ribosomal subunit	GOCC	56	0.17969	3.05477	8.69045e-50	9.73331e-48	up	11224, 23521, 25873, 4736, 6122, 6124, 6125, 6128, 6129, 6130, 6133, 6134, 6135, 6137, 6138, 6139, 6141, 6142, 6143, 6144, 6146, 6147, 6152, 6154, 6155, 6156, 6157, 6158, 6159, 6160, 6161, 6164, 6165, 6166, 6167, 6168, 6169, 6170, 6171, 6173, 6175, 6176, 6181, 9045, 9349	6.43094e-48	RPL18, RPL31, RPL6, RPLP0, RPL3, RPL18A, RPL28, RPL19, RPL34, RPL24, RPL22, RPL21, RPL5, RPL23, RPL36, RPL27, RPL35, RPLP1, RPL13A, RPL11, RPL32, RPL37, RPL10, RPL7, RPL7A, RPL30, RPL26, RPL29, RPL9, RPL36AL, RPL27A, RPL13, RPL38, RPL4, RPL15, RPLP2, RPL35A, RPL14, RPL37A, RPL23A, RPL10A, RPL39, RPL41, RPL36A, RPL17
282	GO:0022627	cytosolic small ribosomal subunit	GOCC	37	0.178565	3.03348	2.79701e-35	1.26879e-33	up	1939, 3921, 6187, 6188, 6189, 6191, 6193, 6194, 6201, 6202, 6203, 6204, 6205, 6206, 6207, 6208, 6209, 6210, 6217, 6218, 6222, 6223, 6224, 6227, 6228, 6229, 6230, 6231, 6232, 6233, 6234, 6235	1.39718e-33	RPS20, RPS5, RPS16, RPS19, RPS13, RPS12, RPS15, RPS25, RPS10, RPS15A, RPS6, RPS24, RPS2, RPS11, RPS8, EIF2D, RPS27A, RPS3A, RPS3, RPS14, RPSA, RPS9, RPS21, RPS7, RPS27, RPS17, RPS23, RPS26, RPS4X, RPS29, RPS18, RPS28
269	GO:0044391	ribosomal subunit	GOCC	150	0.15664	2.64708	3.21076e-77	1.21761e-74	up	10399, 11224, 1939, 23521, 25873, 28973, 3921, 4736, 51021, 51081, 51258, 51264, 51373, 51650, 54460, 54948, 6122, 6124, 6125, 6128, 6129, 6130, 6133, 6134, 6135, 6137, 6138, 6139, 6141, 6142, 6143, 6144, 6146, 6147, 6152, 6154, 6155, 6156, 6157, 6158, 6159, 6160, 6161, 6164, 6165, 6166, 6167, 6168, 6169, 6170, 6171, 6173, 6175, 6176, 6181, 6182, 6187, 6188, 6189, 6191, 6193, 6194, 6201, 6202, 62…	8.04491e-75	RPS20, MRPL43, MRPS24, RPL18, RPL31, RPS5, RPL6, RPLP0, MRPS33, RPL3, RPS16, RPS19, RPL18A, RPL28, RPL19, MRPL27, RPL34, RPS13, MRPL51, RPS12, RPL24, RPS15, RPL22, RPS25, RPL21, RPL5, RPS10, MRPS7, RPL23, RPL36, RPL27, RPS15A, RPL35, RPS6, RPLP1, RPS24, RPS2, RPS11, RPL13A, RPL11, RPS8, EIF2D, RPS27A, RPL32, RPS3A, RPL37, RPL10, RPL7, RPL7A, RPS3, RPL30, RPL26, RPL29, RPL9, RPS14, RPL36AL, RPL27A…
274	GO:0015934	large ribosomal subunit	GOCC	89	0.148869	2.52227	9.67358e-49	9.28664e-47	up	11224, 23521, 25873, 4736, 51258, 51264, 54948, 6122, 6124, 6125, 6128, 6129, 6130, 6133, 6134, 6135, 6137, 6138, 6139, 6141, 6142, 6143, 6144, 6146, 6147, 6152, 6154, 6155, 6156, 6157, 6158, 6159, 6160, 6161, 6164, 6165, 6166, 6167, 6168, 6169, 6170, 6171, 6173, 6175, 6176, 6181, 6182, 65003, 84545, 9045, 9349, 9553	6.13581e-47	MRPL43, RPL18, RPL31, RPL6, RPLP0, RPL3, RPL18A, RPL28, RPL19, MRPL27, RPL34, MRPL51, RPL24, RPL22, RPL21, RPL5, RPL23, RPL36, RPL27, RPL35, RPLP1, RPL13A, RPL11, RPL32, RPL37, RPL10, RPL7, RPL7A, RPL30, RPL26, RPL29, RPL9, RPL36AL, RPL27A, MRPL16, RPL13, RPL38, RPL4, MRPL11, RPL15, RPLP2, RPL35A, RPL14, RPL37A, RPL23A, RPL10A, RPL39, RPL41, RPL36A, MRPL33, MRPL12, RPL17
281	GO:0015935	small ribosomal subunit	GOCC	61	0.146683	2.48824	2.83211e-35	1.26879e-33	up	10399, 1939, 28973, 3921, 51021, 51081, 51373, 51650, 54460, 6187, 6188, 6189, 6191, 6193, 6194, 6201, 6202, 6203, 6204, 6205, 6206, 6207, 6208, 6209, 6210, 6217, 6218, 6222, 6223, 6224, 6227, 6228, 6229, 6230, 6231, 6232, 6233, 6234, 6235, 64951, 64963	1.39718e-33	RPS20, MRPS24, RPS5, MRPS33, RPS16, RPS19, RPS13, RPS12, RPS15, RPS25, RPS10, MRPS7, RPS15A, RPS6, RPS24, RPS2, RPS11, RPS8, EIF2D, RPS27A, RPS3A, RPS3, RPS14, RPSA, RPS9, RPS21, RPS7, RPS27, MRPS11, MRPS16, RPS17, RPS23, RPS26, RPS4X, MRPS18B, RACK1, RPS29, RPS18, RPS28, MRPS17, MRPS21
271	GO:0044445	cytosolic part	GOCC	174	0.136051	2.32915	1.28892e-62	2.16538e-60	up	11224, 119032, 1727, 1939, 23521, 25873, 2647, 3921, 4736, 5213, 6122, 6124, 6125, 6128, 6129, 6130, 6133, 6134, 6135, 6137, 6138, 6139, 6141, 6142, 6143, 6144, 6146, 6147, 6152, 6154, 6155, 6156, 6157, 6158, 6159, 6160, 6161, 6164, 6165, 6166, 6167, 6168, 6169, 6170, 6171, 6173, 6175, 6176, 6181, 6187, 6188, 6189, 6191, 6193, 6194, 6201, 6202, 6203, 6204, 6205, 6206, 6207, 6208, 6209, 6210, 6217…	1.4307e-60	CFLAR, RPS20, RPL18, RPL31, MAP3K13, RPS5, RPL6, RPLP0, CYB5R3, RPL3, RPS16, RPS19, RPL18A, RPL28, RPL19, RPL34, RPS13, RPS12, RPL24, RPS15, RPL22, RPS25, RPL21, RPL5, RPS10, RPL23, RPL36, RPL27, RPS15A, BLOC1S1, RPL35, RPS6, RPLP1, RPS24, RPS2, RPS11, RPL13A, RPL11, RPS8, EIF2D, RPS27A, RPL32, RPS3A, RPL37, RPL10, RPL7, RPL7A, RPS3, PFKM, RPL30, RPL26, RPL29, RPL9, RPS14, RPL36AL, BORCS7, RPL27A…
270	GO:0005840	ribosome	GOCC	209	0.135312	2.31848	3.75227e-69	8.40508e-67	up	10399, 11224, 116540, 1939, 23521, 25873, 28973, 3921, 4736, 51021, 51081, 51258, 51264, 51373, 51650, 54460, 54948, 6122, 6124, 6125, 6128, 6129, 6130, 6133, 6134, 6135, 6137, 6138, 6139, 6141, 6142, 6143, 6144, 6146, 6147, 6152, 6154, 6155, 6156, 6157, 6158, 6159, 6160, 6161, 6164, 6165, 6166, 6167, 6168, 6169, 6170, 6171, 6173, 6175, 6176, 6181, 6182, 6187, 6188, 6189, 6191, 6193, 6194, 6201, …	5.55336e-67	RPS20, MRPL43, MRPS24, RPL18, RPL31, RPS5, RPL6, RPLP0, MRPS33, RPL3, RPS16, RPS19, RPL18A, RPL28, RPL19, MRPL27, RPL34, RPS13, MRPL51, RPS12, RPL24, RPS15, RPL22, RPS25, RPL21, RPL5, RPS10, MRPS7, RPL23, RRBP1, RPL36, RPL27, RPS15A, RPL35, RPS6, RPLP1, RPS24, RPS2, RPS11, RPL13A, RPL11, RPS8, MRPL24, EIF2D, RPS27A, RPL32, RPS3A, RPL37, RPL10, RPL7, RPL7A, MTG1, RPS3, RPL30, RPL26, RPL29, RPL9, R…
294	GO:0005581	collagen trimer	GOCC	28	0.129016	2.22951	2.35844e-13	5.8699e-12	up	11117, 114897, 1277, 1278, 1284, 1289, 1291, 1292, 1634, 4060, 78989, 80781	5.23574e-12	DCN, COL1A1, COLEC11, COL5A1, COL4A2, EMILIN1, LUM, COL6A1, COL6A2, COL1A2, C1QTNF1, COL18A1
298	GO:0034774	secretory granule lumen	GOCC	30	0.119475	2.10116	1.78307e-11	3.86523e-10	up	1191, 2621, 351, 3671, 3959, 5768, 5919, 6414, 6678, 7057, 7076, 7078, 710, 7114	3.29867e-10	TIMP3, TIMP1, RARRES2, LGALS3BP, SPARC, QSOX1, CLU, ISLR, THBS1, APP, SERPING1, GAS6, TMSB4X, SELENOP
272	GO:0031012	extracellular matrix	GOCC	248	0.118151	2.08394	4.34084e-56	5.83409e-54	up	10417, 10491, 1072, 11117, 1191, 1277, 1278, 1284, 1289, 1291, 1292, 1397, 1471, 1509, 1634, 165, 1778, 1842, 203068, 2192, 2316, 2331, 2734, 2817, 293, 302, 3030, 3490, 3491, 3611, 3908, 3911, 3915, 3956, 3958, 3959, 4000, 4016, 4060, 4147, 4237, 4239, 4256, 4313, 4627, 4637, 5052, 5270, 5339, 539, 5549, 5591, 5654, 5919, 6133, 6135, 6146, 6155, 6156, 6165, 6188, 6189, 6191, 6193, 6201, 6204, 62…	3.85466e-54	RPS20, DCN, VIM, TIMP2, GPC1, TGFBR3, FBLN1, RPS5, HADHA, MMP2, LTBP4, GLG1, MYL6, LGALS1, TIMP3, MYH9, CST3, TIMP1, RPS16, RPS19, RARRES2, AEBP1, ECM2, LGALS3BP, COL1A1, CPZ, RPS13, MGP, SMOC2, SPARC, RPL22, MFAP2, PRDX1, CTSD, RPS25, CLU, FMOD, RPS10, RPL23, LOXL1, COL5A1, LAMA5, RPL27, LGALS3, MATN2, RPS15A, COL4A2, LAMC1, SERPINE2, THBS1, EMILIN1, LUM, TGFB1I1, COL6A1, COL6A2, RPS11, RPL11, C…
307	GO:0031093	platelet alpha granule lumen	GOCC	23	0.117316	2.07316	8.39159e-09	1.40979e-07	up	1191, 2621, 351, 3671, 5768, 6678, 7057, 7076, 710, 7114	1.12905e-07	TIMP1, SPARC, QSOX1, CLU, ISLR, THBS1, APP, SERPING1, GAS6, TMSB4X
292	GO:0044420	extracellular matrix component	GOCC	61	0.115633	2.05159	8.93816e-19	2.40258e-17	up	1277, 1278, 1284, 1289, 1291, 1471, 1634, 2192, 302, 3908, 3911, 3915, 4016, 4060, 4147, 4237, 4239, 64094, 667, 6678, 7076, 7078, 80781, 9510, 977	2.20475e-17	DCN, FBLN1, TIMP3, CST3, TIMP1, COL1A1, SMOC2, SPARC, MFAP2, LOXL1, COL5A1, LAMA5, MATN2, COL4A2, LAMC1, LUM, COL6A1, DST, ADAMTS1, COL1A2, MFAP4, CD151, ANXA2, COL18A1, LAMA2
296	GO:0031983	vesicle lumen	GOCC	39	0.110978	1.99309	1.29015e-11	2.88994e-10	up	1191, 2621, 351, 3671, 3959, 5768, 5919, 6414, 6678, 7057, 7076, 7078, 710, 7114	2.49056e-10	TIMP3, TIMP1, RARRES2, LGALS3BP, SPARC, QSOX1, CLU, ISLR, THBS1, APP, SERPING1, GAS6, TMSB4X, SELENOP
297	GO:0060205	cytoplasmic membrane-bounded vesicle lumen	GOCC	39	0.110978	1.99309	1.29015e-11	2.88994e-10	up	1191, 2621, 351, 3671, 3959, 5768, 5919, 6414, 6678, 7057, 7076, 7078, 710, 7114	2.49056e-10	TIMP3, TIMP1, RARRES2, LGALS3BP, SPARC, QSOX1, CLU, ISLR, THBS1, APP, SERPING1, GAS6, TMSB4X, SELENOP
295	GO:0072562	blood microparticle	GOCC	42	0.108856	1.96698	1.06127e-11	2.54705e-10	up	10518, 1191, 1192, 2934, 308, 3303, 3304, 3959, 54973, 60, 710, 715, 716, 718, 721	2.24383e-10	ACTB, LGALS3BP, CLU, C3, INTS11, CIB2, GSN, SERPING1, C1R, ANXA5, C1S, HSPA1B, HSPA1A, CLIC1, C4B
317	GO:0031091	platelet alpha granule	GOCC	36	0.0979727	1.83834	8.69672e-08	1.16884e-06	up	1191, 2621, 351, 3671, 51706, 5270, 5768, 6678, 7057, 7076, 710, 7114, 9749	9.65336e-07	TIMP1, PHACTR2, SPARC, QSOX1, CLU, ISLR, SERPINE2, THBS1, APP, SERPING1, CYB5R1, GAS6, TMSB4X
350	GO:0031941	filamentous actin	GOCC	20	0.0966704	1.82352	7.94192e-05	0.000643009	up	1809, 2316, 6624, 7114, 7171, 9168	0.000559716	TMSB10, FSCN1, DPYSL3, TPM4, FLNA, TMSB4X
288	GO:0005578	proteinaceous extracellular matrix	GOCC	142	0.0959044	1.81486	5.09655e-22	1.6309e-20	up	10417, 10491, 11117, 1277, 1278, 1284, 1289, 1291, 1292, 1471, 1634, 1842, 2192, 2331, 2734, 2817, 302, 3491, 3908, 3911, 3915, 3956, 3959, 4016, 4060, 4147, 4237, 4239, 4256, 4313, 5549, 64094, 649, 667, 6678, 7049, 7076, 7077, 7078, 80781, 8404, 8425, 8532, 9510, 977	1.61634e-20	DCN, TIMP2, GPC1, TGFBR3, FBLN1, MMP2, LTBP4, GLG1, LGALS1, TIMP3, CST3, TIMP1, ECM2, LGALS3BP, COL1A1, CPZ, MGP, SMOC2, SPARC, MFAP2, FMOD, LOXL1, COL5A1, LAMA5, MATN2, COL4A2, LAMC1, EMILIN1, LUM, COL6A1, COL6A2, CCN1, DST, SPARCL1, ADAMTS1, SPON2, COL1A2, MFAP4, BMP1, CRTAP, CD151, ANXA2, COL18A1, PRELP, LAMA2
305	GO:0005604	basement membrane	GOCC	49	0.0957457	1.81307	2.33979e-09	4.13774e-08	up	1284, 1289, 1471, 2192, 302, 3908, 3911, 3915, 4016, 4147, 64094, 667, 6678, 7076, 7078, 80781, 9510, 977	3.35119e-08	FBLN1, TIMP3, CST3, TIMP1, SMOC2, SPARC, LOXL1, COL5A1, LAMA5, MATN2, COL4A2, LAMC1, DST, ADAMTS1, CD151, ANXA2, COL18A1, LAMA2
385	GO:0070069	cytochrome complex	GOCC	20	0.0858167	1.70458	0.00109023	0.00626045	up	1327, 1329, 1337, 1349, 1351, 29796, 4697, 7381, 7386	0.00531937	COX6A1, COX4I1, COX7B, COX5B, UQCRB, UQCRFS1, COX8A, UQCR10, NDUFA4
352	GO:0005796	Golgi lumen	GOCC	28	0.0857342	1.7037	0.000121392	0.000959708	up	1634, 2331, 2621, 2817, 4060, 51150, 5549	0.000829199	DCN, GPC1, SDF4, FMOD, LUM, GAS6, PRELP
388	GO:0045259	proton-transporting ATP synthase complex	GOCC	20	0.0854563	1.70076	0.00117587	0.00653047	up	10476, 513, 516, 517, 522, 539	0.00555413	ATP5F1D, ATP5MC2, ATP5PF, ATP5MC1, ATP5PD, ATP5PO
286	GO:0005925	focal adhesion	GOCC	309	0.0837976	1.68332	9.04148e-28	3.19783e-26	up	10109, 10174, 1072, 11135, 1265, 1465, 2273, 2274, 2316, 23521, 26986, 2934, 308, 3303, 3304, 3482, 3611, 3688, 388, 4035, 4082, 4627, 4736, 5159, 5339, 5479, 55679, 5605, 567, 57175, 60, 6122, 6124, 6125, 6128, 6129, 6130, 6133, 6141, 6143, 6146, 6155, 6156, 6160, 6168, 6169, 6175, 6176, 6181, 6187, 6188, 6189, 6191, 6193, 6201, 6202, 6203, 6204, 6205, 6207, 6208, 6209, 6217, 6218, 6222, 6223, 6…	3.34535e-26	CAPN1, FHL1, VIM, RPL18, CNN2, SLC9A3R2, PABPC1, RPL31, LIMS2, ACTB, TNS1, RPS5, RPL6, RPLP0, RPL3, MYH9, RPS16, RPS19, CAV1, RPL19, CD81, RPS13, PPFIBP1, PDGFRB, RPS15, FHL2, RPL22, SORBS3, RPL5, LRP1, RPS10, AHNAK, RPL23, MAP2K2, CDC42EP1, AKAP12, RPL27, TLN1, RPLP1, TGFB1I1, RPS2, RPS11, RPL13A, RPS8, RHOB, RPS3A, RPL7, GSN, RPL7A, RPS3, ITGB1, DST, RPL30, CSRP1, ARPC2, RPL9, ANXA5, RPS14, ILK…
285	GO:0005924	cell-substrate adherens junction	GOCC	311	0.083749	1.68281	7.38314e-28	2.75637e-26	up	10109, 10174, 10518, 1072, 11135, 1265, 1465, 2273, 2274, 2316, 23521, 26986, 2934, 308, 3303, 3304, 3482, 3611, 3688, 388, 4035, 4082, 4627, 4736, 5159, 5339, 5479, 55679, 5605, 567, 57175, 60, 6122, 6124, 6125, 6128, 6129, 6130, 6133, 6141, 6143, 6146, 6155, 6156, 6160, 6168, 6169, 6175, 6176, 6181, 6187, 6188, 6189, 6191, 6193, 6201, 6202, 6203, 6204, 6205, 6207, 6208, 6209, 6217, 6218, 6222, …	2.9801e-26	CAPN1, FHL1, VIM, RPL18, CNN2, SLC9A3R2, PABPC1, RPL31, LIMS2, ACTB, TNS1, RPS5, RPL6, RPLP0, RPL3, MYH9, RPS16, RPS19, CAV1, RPL19, CD81, RPS13, PPFIBP1, PDGFRB, RPS15, FHL2, RPL22, SORBS3, RPL5, LRP1, RPS10, AHNAK, RPL23, MAP2K2, CDC42EP1, AKAP12, RPL27, CIB2, TLN1, RPLP1, TGFB1I1, RPS2, RPS11, RPL13A, RPS8, RHOB, RPS3A, RPL7, GSN, RPL7A, RPS3, ITGB1, DST, RPL30, CSRP1, ARPC2, RPL9, ANXA5, RPS1…
300	GO:0005788	endoplasmic reticulum lumen	GOCC	93	0.0836236	1.6815	6.19141e-11	1.2608e-09	up	10491, 1277, 1278, 1284, 1289, 1291, 1292, 1522, 25870, 2621, 5479, 5589, 567, 57333, 7057, 79188, 79709, 80310, 80781, 871, 8720, 9563	1.0573e-09	H6PD, CTSZ, COL1A1, SUMF2, PRKCSH, COLGALT1, COL5A1, COL4A2, THBS1, MBTPS1, COL6A1, COL6A2, RCN3, SERPINH1, COL1A2, B2M, PPIB, CRTAP, TMEM43, PDGFD, COL18A1, GAS6
306	GO:0070469	respiratory chain	GOCC	75	0.0828863	1.67382	5.15972e-09	8.8906e-08	up	10975, 11315, 126328, 1327, 1329, 1337, 1347, 1349, 1351, 1537, 29796, 4697, 4710, 4713, 4714, 4715, 4716, 4724, 4725, 4729, 5018, 51079, 54205, 54539, 6392, 7381, 7386, 7388	7.15912e-08	NDUFB4, NDUFB7, COX6A1, COX7A2, PARK7, UQCR11, COX4I1, COX7B, COX5B, NDUFB10, NDUFB11, NDUFB9, OXA1L, UQCRB, NDUFS4, NDUFB8, NDUFS5, UQCRFS1, CYCS, UQCRH, NDUFA11, COX8A, NDUFV2, CYC1, UQCR10, NDUFA13, NDUFA4, SDHD
287	GO:0030055	cell-substrate junction	GOCC	314	0.0820954	1.66561	1.0744e-26	3.60998e-25	up	10109, 10174, 10518, 1072, 11135, 1265, 1465, 2273, 2274, 2316, 23521, 26986, 2934, 308, 3303, 3304, 3482, 3611, 3688, 388, 4035, 4082, 4627, 4736, 5159, 5339, 5479, 55679, 5605, 567, 57175, 60, 6122, 6124, 6125, 6128, 6129, 6130, 6133, 6141, 6143, 6146, 6155, 6156, 6160, 6168, 6169, 6175, 6176, 6181, 6187, 6188, 6189, 6191, 6193, 6201, 6202, 6203, 6204, 6205, 6207, 6208, 6209, 6217, 6218, 6222, …	3.66948e-25	CAPN1, FHL1, VIM, RPL18, CNN2, SLC9A3R2, PABPC1, RPL31, LIMS2, ACTB, TNS1, RPS5, RPL6, RPLP0, RPL3, MYH9, RPS16, RPS19, CAV1, RPL19, CD81, RPS13, PPFIBP1, PDGFRB, RPS15, FHL2, RPL22, SORBS3, RPL5, LRP1, RPS10, AHNAK, RPL23, MAP2K2, CDC42EP1, AKAP12, RPL27, CIB2, TLN1, RPLP1, TGFB1I1, RPS2, RPS11, RPL13A, RPS8, RHOB, RPS3A, RPL7, GSN, RPL7A, RPS3, ITGB1, DST, RPL30, CSRP1, ARPC2, RPL9, ANXA5, RPS1…
336	GO:0005747	mitochondrial respiratory chain complex I	GOCC	41	0.081926	1.66386	1.64025e-05	0.000155246	up	11315, 126328, 4697, 4710, 4713, 4714, 4715, 4716, 4724, 4725, 4729, 51079, 54539	0.000125564	NDUFB4, NDUFB7, PARK7, NDUFB10, NDUFB11, NDUFB9, NDUFS4, NDUFB8, NDUFS5, NDUFA11, NDUFV2, NDUFA13, NDUFA4
337	GO:0030964	NADH dehydrogenase complex	GOCC	41	0.081926	1.66386	1.64025e-05	0.000155246	up	11315, 126328, 4697, 4710, 4713, 4714, 4715, 4716, 4724, 4725, 4729, 51079, 54539	0.000125564	NDUFB4, NDUFB7, PARK7, NDUFB10, NDUFB11, NDUFB9, NDUFS4, NDUFB8, NDUFS5, NDUFA11, NDUFV2, NDUFA13, NDUFA4
338	GO:0045271	respiratory chain complex I	GOCC	41	0.081926	1.66386	1.64025e-05	0.000155246	up	11315, 126328, 4697, 4710, 4713, 4714, 4715, 4716, 4724, 4725, 4729, 51079, 54539	0.000125564	NDUFB4, NDUFB7, PARK7, NDUFB10, NDUFB11, NDUFB9, NDUFS4, NDUFB8, NDUFS5, NDUFA11, NDUFV2, NDUFA13, NDUFA4
315	GO:0005746	mitochondrial respiratory chain	GOCC	68	0.0810917	1.65525	6.69074e-08	9.2732e-07	up	11315, 126328, 1327, 1329, 1337, 1347, 1349, 1351, 29796, 4697, 4710, 4713, 4714, 4715, 4716, 4724, 4725, 4729, 5018, 51079, 54539, 6392, 7381, 7386, 7388	7.69795e-07	NDUFB4, NDUFB7, COX6A1, COX7A2, PARK7, COX4I1, COX7B, COX5B, NDUFB10, NDUFB11, NDUFB9, OXA1L, UQCRB, NDUFS4, NDUFB8, NDUFS5, UQCRFS1, UQCRH, NDUFA11, COX8A, NDUFV2, UQCR10, NDUFA13, NDUFA4, SDHD
323	GO:0098803	respiratory chain complex	GOCC	62	0.080754	1.65178	2.79803e-07	3.35764e-06	up	11315, 126328, 1327, 1329, 1337, 1349, 1351, 29796, 4697, 4710, 4713, 4714, 4715, 4716, 4724, 4725, 4729, 51079, 54539, 6392, 7381, 7386	2.82347e-06	NDUFB4, NDUFB7, COX6A1, PARK7, COX4I1, COX7B, COX5B, NDUFB10, NDUFB11, NDUFB9, UQCRB, NDUFS4, NDUFB8, NDUFS5, UQCRFS1, NDUFA11, COX8A, NDUFV2, UQCR10, NDUFA13, NDUFA4, SDHD
398	GO:0005771	multivesicular body	GOCC	22	0.0798809	1.64284	0.00219942	0.0112825	up	1471, 30061, 684, 7178, 967, 972	0.0100675	CD74, CST3, BST2, TPT1, CD63, SLC40A1
284	GO:0005615	extracellular space	GOCC	482	0.0775025	1.61874	3.01485e-31	1.19175e-29	up	10404, 10417, 10491, 10518, 10549, 1072, 114897, 114900, 114990, 1152, 1191, 1192, 1277, 1278, 128240, 1292, 1363, 1368, 1471, 1509, 1514, 1522, 1634, 165, 1809, 1842, 1915, 2192, 2331, 23318, 25824, 2621, 2647, 2817, 2878, 2934, 2950, 29937, 302, 308, 3303, 3304, 3482, 3485, 3487, 3488, 3489, 3490, 351, 3858, 3911, 3915, 3956, 3958, 3959, 4016, 4060, 4282, 4313, 4343, 4521, 4924, 5052, 5066, 526…	1.33859e-29	DCN, TIMP2, GPC1, TGFBR3, ACTB, FBLN1, GSTP1, MMP2, LTBP4, LGALS1, TIMP3, PLTP, CTSZ, CST3, TIMP1, CPQ, NUCB1, CLEC11A, PON3, NUDT1, AEBP1, ECM2, PTGDS, CXCL12, ACTA2, LGALS3BP, COL1A1, CPE, CPZ, SPARC, DPYSL3, IGFBP2, IGFBP5, QSOX1, PRDX1, PRDX6, NENF, CTSD, SLF2, CLU, FMOD, PRDX4, SERPINB6, C3, PRDX5, INTS11, LOXL1, LAMA5, SH3BGRL, PPT1, LGALS3, SDF2, TPT1, YARS, TUT4, CTSL, CD63, BLOC1S1, PPP1…
325	GO:0005775	vacuolar lumen	GOCC	67	0.0772811	1.61651	6.05143e-07	7.01132e-06	up	1509, 1514, 1634, 196463, 2331, 23324, 2817, 351, 4060, 4758, 5159, 5538, 5549, 5660, 567, 8722, 967, 972	5.84095e-06	DCN, MAN2B2, CD74, GPC1, PDGFRB, CTSD, FMOD, PPT1, CTSL, CD63, LUM, APP, PLBD2, B2M, CTSF, PRELP, PSAP
359	GO:0001725	stress fiber	GOCC	38	0.0760022	1.60372	0.000209946	0.00151703	up	103910, 10398, 1265, 3611, 4627, 4638, 57175, 6624, 7171, 9260	0.0013129	CNN2, MYLK, FSCN1, MYH9, MYL9, MYL12B, ILK, TPM4, CORO1B, PDLIM7
360	GO:0097517	contractile actin filament bundle	GOCC	38	0.0760022	1.60372	0.000209946	0.00151703	up	103910, 10398, 1265, 3611, 4627, 4638, 57175, 6624, 7171, 9260	0.0013129	CNN2, MYLK, FSCN1, MYH9, MYL9, MYL12B, ILK, TPM4, CORO1B, PDLIM7
355	GO:0042641	actomyosin	GOCC	44	0.0737873	1.58179	0.000140256	0.00107105	up	103910, 10398, 1265, 1627, 3611, 4627, 4638, 57175, 6624, 7171, 9260	0.00092946	CNN2, MYLK, FSCN1, MYH9, MYL9, DBN1, MYL12B, ILK, TPM4, CORO1B, PDLIM7
377	GO:0032432	actin filament bundle	GOCC	40	0.0712697	1.55724	0.000553007	0.00337837	up	103910, 10398, 1265, 3611, 4627, 4638, 57175, 6624, 7171, 9260	0.00288865	CNN2, MYLK, FSCN1, MYH9, MYL9, MYL12B, ILK, TPM4, CORO1B, PDLIM7
313	GO:0098800	inner mitochondrial membrane protein complex	GOCC	106	0.070885	1.55352	4.83865e-08	7.06864e-07	up	10476, 11315, 125988, 126328, 1327, 1329, 1337, 1351, 293, 29796, 4697, 4710, 4713, 4714, 4715, 4716, 4724, 4725, 4729, 51079, 513, 516, 517, 522, 539, 54539, 6392, 7381, 7386, 91689	5.80638e-07	NDUFB4, ATP5F1D, NDUFB7, COX6A1, PARK7, COX4I1, ATP5MC2, COX5B, NDUFB10, NDUFB11, NDUFB9, ATP5PF, UQCRB, ATP5MC1, NDUFS4, NDUFB8, ATP5PD, NDUFS5, UQCRFS1, SLC25A6, NDUFA11, MICOS13, COX8A, NDUFV2, SMDT1, UQCR10, NDUFA13, NDUFA4, SDHD, ATP5PO
382	GO:0030670	phagocytic vesicle membrane	GOCC	41	0.0693457	1.53873	0.000785321	0.004589	up	3105, 3106, 3107, 3133, 567, 83871	0.00387425	RAB34, B2M, HLA-C, HLA-E, HLA-B
356	GO:0043202	lysosomal lumen	GOCC	58	0.0672096	1.51844	0.000146621	0.00110707	up	1509, 1514, 1634, 196463, 2331, 23324, 2817, 4060, 4758, 5159, 5538, 5549, 5660, 8722, 972	0.000957351	DCN, MAN2B2, CD74, GPC1, PDGFRB, CTSD, FMOD, PPT1, CTSL, LUM, PLBD2, CTSF, PRELP, PSAP
320	GO:0098798	mitochondrial protein complex	GOCC	135	0.0628049	1.47744	2.54089e-07	3.22166e-06	up	10476, 11315, 125988, 126328, 1327, 1329, 1337, 1351, 2109, 26517, 293, 29796, 3030, 4697, 4710, 4713, 4714, 4715, 4716, 4724, 4725, 4729, 51079, 513, 516, 517, 522, 539, 54539, 54543, 581, 6392, 7381, 7386, 91689	2.62362e-06	NDUFB4, HADHA, BAX, ATP5F1D, NDUFB7, TIMM13, ETFB, COX6A1, PARK7, COX4I1, ATP5MC2, COX5B, NDUFB10, NDUFB11, NDUFB9, ATP5PF, UQCRB, ATP5MC1, NDUFS4, NDUFB8, ATP5PD, NDUFS5, UQCRFS1, SLC25A6, NDUFA11, MICOS13, COX8A, NDUFV2, SMDT1, UQCR10, NDUFA13, NDUFA4, TOMM7, SDHD, ATP5PO
310	GO:0044455	mitochondrial membrane part	GOCC	157	0.0627757	1.47717	3.31597e-08	5.18216e-07	up	10476, 11315, 125988, 126328, 1327, 1329, 1337, 1347, 1349, 1351, 28958, 293, 29796, 4697, 4710, 4713, 4714, 4715, 4716, 4724, 4725, 4729, 5018, 51024, 51079, 513, 516, 517, 522, 539, 54539, 54543, 6392, 65991, 6770, 7381, 7386, 7388, 80024, 89941, 91689	4.08969e-07	NDUFB4, SLC8B1, ATP5F1D, NDUFB7, COX6A1, COX7A2, PARK7, COX4I1, COX7B, ATP5MC2, COX5B, RHOT2, NDUFB10, NDUFB11, STAR, NDUFB9, ATP5PF, OXA1L, UQCRB, ATP5MC1, NDUFS4, FUNDC2, NDUFB8, ATP5PD, NDUFS5, UQCRFS1, SLC25A6, UQCRH, NDUFA11, MICOS13, COX8A, NDUFV2, SMDT1, COA3, UQCR10, NDUFA13, NDUFA4, TOMM7, SDHD, FIS1, ATP5PO
437	GO:0000315	organellar large ribosomal subunit	GOCC	31	0.0609474	1.46048	0.0149533	0.0577505	up	51258, 51264, 54948, 6182, 65003, 84545, 9553	0.0534808	MRPL43, MRPL27, MRPL51, MRPL16, MRPL11, MRPL33, MRPL12
438	GO:0005762	mitochondrial large ribosomal subunit	GOCC	31	0.0609474	1.46048	0.0149533	0.0577505	up	51258, 51264, 54948, 6182, 65003, 84545, 9553	0.0534808	MRPL43, MRPL27, MRPL51, MRPL16, MRPL11, MRPL33, MRPL12
291	GO:0005912	adherens junction	GOCC	560	0.059876	1.45079	3.63608e-19	1.0181e-17	up	10109, 10174, 10399, 10518, 1072, 10848, 11135, 11315, 114793, 114990, 1192, 1265, 1465, 1627, 1937, 199731, 2273, 2274, 2316, 23521, 26986, 2934, 302, 308, 3303, 3304, 3482, 3611, 3646, 3688, 388, 4035, 4082, 4627, 4736, 5052, 5159, 5339, 5479, 54806, 55082, 55591, 55679, 55898, 5605, 567, 56904, 5694, 57175, 60, 6122, 6124, 6125, 6128, 6129, 6130, 6133, 6138, 6141, 6143, 6146, 6147, 6152, 6155,…	9.49658e-18	CAPN1, FHL1, VIM, VEZT, RPL18, CNN2, SLC9A3R2, PABPC1, RPL31, LIMS2, FSCN1, ACTB, TNS1, RPS5, RPL6, RPLP0, RPL3, MYH9, EIF3E, PPP1R13L, RPS16, RPS19, CADM4, CAV1, RPL19, RPL34, CD81, RPS13, PPFIBP1, PDGFRB, DBN1, RPL24, RPS15, SPTBN1, FHL2, RPL22, PARK7, PRDX1, PRDX6, SORBS3, RPL5, CALD1, LRP1, RPS10, AHNAK, RPL23, MAP2K2, CDC42EP1, AKAP12, RPL27, ARGLU1, AHI1, CIB2, TLN1, RPLP1, UNC45A, TGFB1I1,…
289	GO:0030529	intracellular ribonucleoprotein complex	GOCC	683	0.059736	1.44952	7.30662e-22	2.23184e-20	up	10011, 10399, 10436, 10949, 11224, 1153, 116540, 140890, 1939, 199746, 203068, 2091, 23521, 255967, 25873, 26986, 27335, 28973, 3178, 3187, 348262, 3646, 3692, 3921, 3958, 4343, 4736, 51021, 51081, 51258, 51264, 51373, 51386, 51650, 51691, 51747, 54460, 54948, 55011, 55272, 55323, 55651, 5682, 57819, 58517, 60, 6122, 6124, 6125, 6128, 6129, 6130, 6133, 6134, 6135, 6137, 6138, 6139, 6141, 6142, 61…	2.16276e-20	RPS20, MRPL43, MRPS24, RPL18, PABPC1, RPL31, ACTB, RPS5, RPL6, RPLP0, MRPS33, CIRBP, EIF3L, RPL3, EIF3D, PABPN1, EIF3E, PIH1D1, RPS16, FBL, RPS19, RPL18A, RPL28, RPL19, MRPL27, LUC7L3, RPL34, RPS13, MRPL51, RPS12, RPL24, RPS15, TIA1, RPL22, RPS25, RBM25, RPL21, RPL5, RPS10, MRPS7, RPL23, RRBP1, EMG1, ZFP36, LSM8, SNRPN, PSMA1, RPL36, EIF3G, RPL27, LGALS3, RPS15A, PAN2, HNRNPA1, RPL35, RPS6, RPLP1…
290	GO:1990904	ribonucleoprotein complex	GOCC	684	0.0593859	1.44637	1.32471e-21	3.87046e-20	up	10011, 10399, 10436, 10949, 11224, 1153, 116540, 140890, 1939, 199746, 203068, 2091, 23521, 255967, 25873, 26986, 27335, 28973, 3178, 3187, 348262, 3646, 3692, 3921, 3958, 4343, 4736, 51021, 51081, 51258, 51264, 51373, 51386, 51650, 51691, 51747, 54460, 54948, 55011, 55272, 55323, 55651, 5682, 57819, 58517, 60, 6122, 6124, 6125, 6128, 6129, 6130, 6133, 6134, 6135, 6137, 6138, 6139, 6141, 6142, 61…	3.67607e-20	RPS20, MRPL43, MRPS24, RPL18, PABPC1, RPL31, ACTB, RPS5, RPL6, RPLP0, MRPS33, CIRBP, EIF3L, RPL3, EIF3D, PABPN1, EIF3E, PIH1D1, RPS16, FBL, RPS19, RPL18A, RPL28, RPL19, MRPL27, LUC7L3, RPL34, RPS13, MRPL51, RPS12, RPL24, RPS15, TIA1, RPL22, RPS25, RBM25, RPL21, RPL5, RPS10, MRPS7, RPL23, RRBP1, EMG1, ZFP36, LSM8, SNRPN, PSMA1, RPL36, EIF3G, RPL27, LGALS3, RPS15A, PAN2, HNRNPA1, RPL35, RPS6, RPLP1…
293	GO:0070161	anchoring junction	GOCC	568	0.0589997	1.44291	9.85036e-19	2.54594e-17	up	10109, 10174, 10399, 10518, 1072, 10848, 11135, 11315, 114793, 114990, 1192, 1265, 1465, 1627, 1937, 199731, 2273, 2274, 2316, 23521, 26986, 2934, 302, 308, 3303, 3304, 3482, 3611, 3646, 3688, 388, 4035, 4082, 4627, 4736, 5052, 5159, 5339, 5479, 54806, 55082, 55591, 55679, 55898, 5605, 567, 56904, 5694, 57175, 60, 6122, 6124, 6125, 6128, 6129, 6130, 6133, 6138, 6141, 6143, 6146, 6147, 6152, 6155,…	2.30187e-17	CAPN1, FHL1, VIM, VEZT, RPL18, CNN2, SLC9A3R2, PABPC1, RPL31, LIMS2, FSCN1, ACTB, TNS1, RPS5, RPL6, RPLP0, RPL3, MYH9, EIF3E, PPP1R13L, RPS16, RPS19, CADM4, CAV1, RPL19, RPL34, CD81, RPS13, PPFIBP1, PDGFRB, DBN1, RPL24, RPS15, SPTBN1, FHL2, RPL22, PARK7, PRDX1, PRDX6, SORBS3, RPL5, CALD1, LRP1, RPS10, AHNAK, RPL23, MAP2K2, CDC42EP1, AKAP12, RPL27, ARGLU1, AHI1, CIB2, TLN1, RPLP1, UNC45A, TGFB1I1,…
378	GO:0000313	organellar ribosome	GOCC	71	0.0580214	1.43416	0.000658553	0.00395132	up	28973, 51021, 51081, 51258, 51264, 51373, 51650, 54460, 54948, 6182, 64951, 64963, 64976, 65003, 78988, 84545, 90480, 92170, 9553	0.00335901	MRPL43, MRPS24, MRPS33, MRPL27, MRPL51, MRPS7, MTG1, MRPL16, MRPL57, MRPL11, GADD45GIP1, MRPS11, MRPS16, MRPL40, MRPS18B, MRPS17, MRPL33, MRPL12, MRPS21
379	GO:0005761	mitochondrial ribosome	GOCC	71	0.0580214	1.43416	0.000658553	0.00395132	up	28973, 51021, 51081, 51258, 51264, 51373, 51650, 54460, 54948, 6182, 64951, 64963, 64976, 65003, 78988, 84545, 90480, 92170, 9553	0.00335901	MRPL43, MRPS24, MRPS33, MRPL27, MRPL51, MRPS7, MTG1, MRPL16, MRPL57, MRPL11, GADD45GIP1, MRPS11, MRPS16, MRPL40, MRPS18B, MRPS17, MRPL33, MRPL12, MRPS21
370	GO:1990204	oxidoreductase complex	GOCC	80	0.0572163	1.427	0.000399867	0.00260884	up	11315, 126328, 29796, 4697, 4710, 4713, 4714, 4715, 4716, 4724, 4725, 4729, 51079, 51292, 54539, 6392, 7381, 7386	0.00219186	NDUFB4, NDUFB7, GMPR2, PARK7, NDUFB10, NDUFB11, NDUFB9, UQCRB, NDUFS4, NDUFB8, NDUFS5, UQCRFS1, NDUFA11, NDUFV2, UQCR10, NDUFA13, NDUFA4, SDHD
340	GO:0043292	contractile fiber	GOCC	124	0.0560728	1.4169	2.16203e-05	0.000199026	up	10273, 103910, 10398, 140465, 1471, 202333, 2274, 23345, 23363, 274, 3611, 3856, 3998, 4313, 4660, 5339, 5530, 59, 667, 6711, 6840, 7169, 7171, 79026, 800, 808	0.000162702	LMAN1, PPP1R12B, MMP2, MYL9, CST3, STUB1, ACTA2, SPTBN1, FHL2, MYL12B, CALD1, OBSL1, AHNAK, SYNE1, BIN1, PPP3CA, DST, CALM3, CMYA5, ILK, TPM4, KRT8, PLEC, MYL6B, SVIL, TPM2
446	GO:0016459	myosin complex	GOCC	39	0.0556188	1.41291	0.0163949	0.0615494	up	103910, 10398, 10627, 140465, 4627, 4637	0.0568697	MYL6, MYH9, MYL9, MYL12A, MYL12B, MYL6B
451	GO:0012507	ER to Golgi transport vesicle membrane	GOCC	38	0.0552209	1.40942	0.0189515	0.0692143	up	10972, 3105, 3106, 3107, 3133, 3998, 567, 90411, 972	0.0632668	CD74, LMAN1, B2M, TMED10, MCFD2, HLA-C, HLA-E, HLA-B
488	GO:0030687	preribosome, large subunit precursor	GOCC	28	0.0536993	1.39615	0.0519664	0.158015	up	3692, 6175, 6176, 6181	0.145114	RPLP0, RPLP1, RPLP2, EIF6
299	GO:0005743	mitochondrial inner membrane	GOCC	401	0.052268	1.38379	3.91426e-11	8.21995e-10	up	10476, 10730, 10975, 11315, 11331, 116540, 123096, 125988, 126328, 1327, 1329, 1337, 1345, 1347, 1349, 1351, 140823, 1537, 1593, 1727, 23787, 25915, 2628, 26517, 28958, 28973, 293, 29796, 3030, 37, 373156, 3958, 4129, 4697, 4710, 4713, 4714, 4715, 4716, 4724, 4725, 4729, 5018, 51021, 51079, 51081, 51258, 51264, 51295, 513, 51312, 51373, 516, 51650, 517, 522, 539, 54205, 54460, 54539, 54948, 54998…	6.95173e-10	PRKAR2B, MRPL43, MRPS24, NDUFB4, MAOB, ACADVL, HADHA, SLC8B1, MRPS33, ATP5F1D, NDUFB7, TIMM13, CYB5R3, UQCC1, SLC25A11, MRPL27, MRPL51, COX6A1, COX7A2, PARK7, MRPS7, ROMO1, UQCR11, ECSIT, COX4I1, COX7B, LGALS3, ATP5MC2, CYP27A1, COX5B, YME1L1, MTCH1, NDUFB10, MRPL24, NDUFB11, SLC25A37, STAR, NDUFB9, MTG1, RPS3, ATP5PF, OXA1L, UQCRB, ATP5MC1, SUCLG1, NDUFS4, COX6C, VDAC2, NDUFB8, MRPL16, ATP5PD, N…
407	GO:0042383	sarcolemma	GOCC	69	0.052109	1.38242	0.00366008	0.0175684	up	10518, 10519, 1291, 1292, 274, 302, 3688, 3856, 3908, 5339, 54407, 5530, 6443, 682, 784, 79026, 80024	0.0162507	SLC8B1, AHNAK, SLC38A2, CIB2, BIN1, PPP3CA, COL6A1, COL6A2, ITGB1, SGCB, CACNB3, KRT8, BSG, PLEC, ANXA2, CIB1, LAMA2
365	GO:0044449	contractile fiber part	GOCC	112	0.0509086	1.37215	0.000369389	0.00246278	up	10273, 103910, 10398, 140465, 202333, 2274, 23345, 23363, 274, 3611, 3856, 3998, 4313, 4660, 5339, 5530, 59, 667, 6711, 6840, 7169, 7171, 79026, 808	0.00207467	LMAN1, PPP1R12B, MMP2, MYL9, STUB1, ACTA2, SPTBN1, FHL2, MYL12B, OBSL1, AHNAK, SYNE1, BIN1, PPP3CA, DST, CALM3, CMYA5, ILK, TPM4, KRT8, PLEC, MYL6B, SVIL, TPM2
364	GO:0030016	myofibril	GOCC	118	0.0502547	1.36658	0.0003306	0.00229034	up	10273, 103910, 10398, 202333, 2274, 23345, 23363, 274, 3611, 3856, 3998, 4313, 4660, 5339, 5530, 667, 6711, 6840, 7169, 7171, 79026, 800, 808	0.00195715	LMAN1, PPP1R12B, MMP2, MYL9, STUB1, SPTBN1, FHL2, MYL12B, CALD1, OBSL1, AHNAK, SYNE1, BIN1, PPP3CA, DST, CALM3, CMYA5, ILK, TPM4, KRT8, PLEC, SVIL, TPM2
529	GO:0000314	organellar small ribosomal subunit	GOCC	25	0.0494527	1.35979	0.0998084	0.253931	up	28973, 51021, 51081, 51373, 51650, 54460, 64951, 64963	0.232333	MRPS24, MRPS33, MRPS7, MRPS11, MRPS16, MRPS18B, MRPS17, MRPS21
531	GO:0005763	mitochondrial small ribosomal subunit	GOCC	25	0.0494527	1.35979	0.0998084	0.253931	up	28973, 51021, 51081, 51373, 51650, 54460, 64951, 64963	0.232333	MRPS24, MRPS33, MRPS7, MRPS11, MRPS16, MRPS18B, MRPS17, MRPS21
302	GO:0019866	organelle inner membrane	GOCC	437	0.0488313	1.35455	2.88426e-10	5.53777e-09	up	10476, 10730, 10975, 11315, 11331, 116540, 123096, 125988, 126328, 1327, 1329, 1337, 1345, 1347, 1349, 1351, 140823, 1537, 1593, 1727, 23787, 25915, 2628, 26517, 28958, 28973, 293, 29796, 3030, 37, 373156, 3958, 4129, 4697, 4710, 4713, 4714, 4715, 4716, 4724, 4725, 4729, 5018, 51021, 51079, 51081, 51258, 51264, 51295, 513, 51312, 51373, 516, 51650, 517, 522, 539, 54205, 54460, 54539, 54948, 54998…	4.5736e-09	PRKAR2B, MRPL43, MRPS24, NDUFB4, MAOB, ACADVL, HADHA, SLC8B1, MRPS33, ATP5F1D, NDUFB7, TIMM13, CYB5R3, UQCC1, SLC25A11, MRPL27, MRPL51, COX6A1, COX7A2, PARK7, MRPS7, ROMO1, UQCR11, ECSIT, COX4I1, COX7B, LGALS3, ATP5MC2, CYP27A1, COX5B, YME1L1, MTCH1, NDUFB10, MRPL24, NDUFB11, SLC25A37, STAR, NDUFB9, MTG1, RPS3, ATP5PF, OXA1L, UQCRB, ATP5MC1, SUCLG1, NDUFS4, COX6C, VDAC2, NDUFB8, MRPL16, ATP5PD, N…
566	GO:0045178	basal part of cell	GOCC	23	0.0462106	1.33267	0.148426	0.333586	up	5010, 667, 9454	0.306517	CLDN11, HOMER3, DST
301	GO:0031966	mitochondrial membrane	GOCC	533	0.0455659	1.32734	2.7735e-10	5.48174e-09	up	10476, 10730, 10975, 11315, 11331, 116540, 1191, 123096, 125988, 126328, 1327, 1329, 1337, 1345, 1347, 1349, 1351, 140823, 1537, 1593, 1727, 22877, 23645, 23770, 23787, 25915, 2628, 26517, 28958, 28973, 293, 29796, 3030, 37, 373156, 3958, 4129, 445, 4697, 4710, 4713, 4714, 4715, 4716, 4724, 4725, 4729, 4830, 5018, 51021, 51024, 51079, 51081, 51258, 51264, 51295, 513, 51312, 51373, 516, 51650, 517…	4.56087e-09	PRKAR2B, MRPL43, MRPS24, NDUFB4, MAOB, ACADVL, HADHA, PPP1R15A, BAX, SLC8B1, MRPS33, ATP5F1D, NDUFB7, TIMM13, CYB5R3, UQCC1, FKBP8, SLC25A11, MRPL27, MRPL51, COX6A1, COX7A2, PARK7, CLU, MRPS7, ROMO1, UQCR11, ECSIT, ASS1, COX4I1, COX7B, LGALS3, RAF1, ATP5MC2, CYP27A1, COX5B, YME1L1, MTCH1, RHOT2, NDUFB10, MRPL24, NDUFB11, SLC25A37, STAR, NDUFB9, MTG1, RPS3, ATP5PF, OXA1L, UQCRB, ATP5MC1, SUCLG1, N…
560	GO:0005689	U12-type spliceosomal complex	GOCC	26	0.0451539	1.32394	0.136084	0.31211	up		0.286356
465	GO:0030863	cortical cytoskeleton	GOCC	57	0.0446976	1.32019	0.0301825	0.101631	up	1915, 2316, 26012, 2934, 2995, 4627, 60, 6711, 7171, 800	0.0939144	ACTB, MYH9, SPTBN1, CALD1, GYPC, GSN, EEF1A1, NSMF, TPM4, FLNA
445	GO:0031970	organelle envelope lumen	GOCC	71	0.0445368	1.31887	0.016265	0.061405	up	11315, 203068, 2628, 2647, 26517, 27166, 3482, 351, 4713, 4725, 54205, 6653, 6770, 84269	0.0568635	NDUFB7, TIMM13, PARK7, CHCHD5, BLOC1S1, SORL1, APP, STAR, NDUFS5, PRELID1, GATM, CYCS, TUBB, IGF2R
303	GO:0005740	mitochondrial envelope	GOCC	569	0.0438517	1.31327	5.69686e-10	1.06341e-08	up	10476, 10730, 10975, 11315, 11331, 116540, 1191, 123096, 125988, 126328, 1327, 1329, 1337, 1345, 1347, 1349, 1351, 140823, 1537, 1593, 1727, 22877, 23645, 23770, 23787, 25915, 2628, 2647, 26517, 27166, 28958, 28973, 293, 29796, 3030, 37, 373156, 3958, 4129, 445, 4697, 4710, 4713, 4714, 4715, 4716, 4724, 4725, 4729, 4830, 5018, 51021, 51024, 51079, 51081, 51258, 51264, 51295, 513, 51312, 51373, 51…	8.72209e-09	PRKAR2B, MRPL43, MRPS24, NDUFB4, MAOB, ACADVL, HADHA, PPP1R15A, BAX, SLC8B1, MRPS33, ATP5F1D, NDUFB7, TIMM13, CYB5R3, UQCC1, FKBP8, SLC25A11, MRPL27, MRPL51, COX6A1, COX7A2, PARK7, CLU, MRPS7, CHCHD5, ROMO1, UQCR11, ECSIT, ASS1, COX4I1, COX7B, LGALS3, RAF1, ATP5MC2, BLOC1S1, CYP27A1, COX5B, YME1L1, MTCH1, RHOT2, NDUFB10, MRPL24, NDUFB11, SLC25A37, STAR, NDUFB9, MTG1, RPS3, ATP5PF, OXA1L, UQCRB, A…
522	GO:0005844	polysome	GOCC	36	0.0434553	1.31004	0.0954374	0.248581	up	5682, 6130, 6188, 6191, 6194	0.228386	PSMA1, RPS6, RPL7A, RPS3, RPS4X
511	GO:0005901	caveola	GOCC	42	0.0428918	1.30546	0.0767598	0.211404	up	284119, 3643, 857	0.19475	CAV1, INSR, CAVIN1
484	GO:0030134	ER to Golgi transport vesicle	GOCC	54	0.042841	1.30505	0.0454816	0.141335	up	10972, 1522, 3105, 3106, 3107, 3133, 351, 3998, 567, 90411, 972	0.129897	CD74, LMAN1, CTSZ, APP, B2M, TMED10, MCFD2, HLA-C, HLA-E, HLA-B
422	GO:0030017	sarcomere	GOCC	100	0.0425509	1.3027	0.00735279	0.0318779	up	10273, 103910, 10398, 202333, 2274, 23345, 23363, 274, 3611, 3856, 3998, 4313, 4660, 5530, 667, 6711, 7169, 7171, 808	0.0299508	LMAN1, PPP1R12B, MMP2, MYL9, STUB1, SPTBN1, FHL2, MYL12B, OBSL1, SYNE1, BIN1, PPP3CA, DST, CALM3, CMYA5, ILK, TPM4, KRT8, TPM2
436	GO:0030666	endocytic vesicle membrane	GOCC	89	0.0414791	1.29405	0.0141548	0.056284	up	1175, 3105, 3106, 3107, 3133, 4035, 567, 6233, 7311, 83871, 857, 972	0.0528127	CD74, AP2S1, CAV1, RAB34, LRP1, RPS27A, B2M, HLA-C, HLA-E, UBA52, HLA-B
516	GO:0032592	integral component of mitochondrial membrane	GOCC	46	0.0403278	1.28482	0.0866605	0.233879	up	125988, 28958, 5018, 51024, 54543, 65991, 80024, 89941, 91689	0.216165	SLC8B1, RHOT2, OXA1L, FUNDC2, MICOS13, SMDT1, COA3, TOMM7, FIS1
535	GO:0098573	intrinsic component of mitochondrial membrane	GOCC	47	0.0384397	1.26984	0.102723	0.257575	up	125988, 28958, 5018, 51024, 54543, 65991, 80024, 89941, 91689	0.235099	SLC8B1, RHOT2, OXA1L, FUNDC2, MICOS13, SMDT1, COA3, TOMM7, FIS1
505	GO:0045335	phagocytic vesicle	GOCC	59	0.0379911	1.2663	0.071971	0.203212	up	3105, 3106, 3107, 3133, 567, 83871	0.187971	RAB34, B2M, HLA-C, HLA-E, HLA-B
591	GO:0031594	neuromuscular junction	GOCC	31	0.037279	1.26071	0.200917	0.41416	up	10518, 351, 3688, 4627, 5270, 5566, 9145	0.384513	PRKACA, SYNGR1, MYH9, SERPINE2, CIB2, APP, ITGB1
638	GO:0005719	nuclear euchromatin	GOCC	23	0.0356847	1.24828	0.295788	0.534327	up	26012, 3015, 3725, 9314	0.497462	KLF4, H2AFZ, NSMF, JUN
582	GO:0016469	proton-transporting two-sector ATPase complex	GOCC	39	0.0353422	1.24563	0.179256	0.38	up	10476, 513, 516, 517, 522, 539	0.352167	ATP5F1D, ATP5MC2, ATP5PF, ATP5MC1, ATP5PD, ATP5PO
596	GO:0030660	Golgi-associated vesicle membrane	GOCC	37	0.0346079	1.23995	0.202041	0.414443	up	10945, 22818, 81502, 8906, 9445	0.385004	HM13, KDELR1, COPZ1, ITM2B, AP1G2
319	GO:0044429	mitochondrial part	GOCC	787	0.0340753	1.23586	1.08459e-07	1.40162e-06	up	10157, 10202, 10476, 10588, 10730, 10975, 11315, 11331, 116540, 1191, 123096, 125988, 126328, 128240, 1327, 1329, 1337, 1345, 1347, 1349, 1351, 140823, 1537, 1593, 1666, 1716, 1727, 2109, 217, 22877, 23645, 23770, 23787, 25824, 25828, 25915, 2628, 2647, 26517, 27166, 28958, 28973, 293, 29796, 3028, 3030, 326625, 37, 373156, 3958, 4129, 445, 4521, 4697, 4710, 4713, 4714, 4715, 4716, 4724, 4725, 47…	1.14657e-06	ACSM3, PRKAR2B, AASS, MRPL43, MRPS24, NDUFB4, MAOB, HSD17B10, ACADVL, HADHA, PPP1R15A, BAX, SLC8B1, MRPS33, ATP5F1D, NDUFB7, TIMM13, CYB5R3, TXN2, DHRS2, UQCC1, DECR1, ETFB, FKBP8, NUDT1, SLC25A11, MRPL27, ALDH2, MRPL51, COX6A1, COX7A2, DGUOK, PARK7, CLU, CHPF, MRPS7, CHCHD5, ROMO1, PRDX5, UQCR11, ECSIT, ASS1, COX4I1, COX7B, LGALS3, RAF1, ATP5MC2, BLOC1S1, CYP27A1, COX5B, MTHFS, YME1L1, MTCH1, MM…
423	GO:0030141	secretory granule	GOCC	175	0.0339563	1.23494	0.00759267	0.0327069	up	10972, 1191, 1277, 1363, 2621, 351, 3671, 3959, 4016, 4521, 5066, 51706, 5270, 55591, 5768, 5919, 6414, 6678, 682, 7057, 7076, 7078, 710, 7114, 857, 94121, 967, 9749	0.0306468	VEZT, TIMP3, TIMP1, SYTL4, CAV1, NUDT1, RARRES2, LGALS3BP, COL1A1, CPE, PHACTR2, SPARC, QSOX1, CLU, ISLR, LOXL1, CD63, SERPINE2, THBS1, APP, PAM, SERPING1, CYB5R1, TMED10, BSG, GAS6, TMSB4X, SELENOP
644	GO:0031304	intrinsic component of mitochondrial inner membrane	GOCC	24	0.0338119	1.23384	0.316992	0.560043	up	125988, 28958, 91689	0.520224	MICOS13, SMDT1, COA3
645	GO:0031305	integral component of mitochondrial inner membrane	GOCC	24	0.0338119	1.23384	0.316992	0.560043	up	125988, 28958, 91689	0.520224	MICOS13, SMDT1, COA3
664	GO:0071010	prespliceosome	GOCC	21	0.0337448	1.23332	0.35024	0.59285	up	51747, 6638	0.551442	LUC7L3, SNRPN
521	GO:0030684	preribosome	GOCC	69	0.0337023	1.233	0.0926647	0.24516	up	10436, 2091, 3692, 3921, 55272, 6175, 6176, 6181, 6201	0.224826	RPLP0, FBL, EMG1, RPLP1, RPSA, RPS7, RPLP2, IMP3, EIF6
534	GO:0005758	mitochondrial intermembrane space	GOCC	66	0.0336157	1.23233	0.100992	0.254182	up	11315, 2628, 2647, 26517, 27166, 4713, 4725, 54205, 6770, 84269	0.232333	NDUFB7, TIMM13, PARK7, CHCHD5, BLOC1S1, STAR, NDUFS5, PRELID1, GATM, CYCS
648	GO:0036452	ESCRT complex	GOCC	25	0.0333686	1.23044	0.314815	0.560043	up	29082, 51160, 93343	0.520224	MVB12A, VPS28, CHMP4A
642	GO:0030686	90S preribosome	GOCC	26	0.0332265	1.22935	0.307848	0.550197	up	3921, 55272, 6201	0.511927	RPSA, RPS7, IMP3
316	GO:0030054	cell junction	GOCC	912	0.0327434	1.22567	6.76171e-08	9.2732e-07	up	10109, 10174, 1019, 10399, 10518, 10567, 1072, 10791, 10848, 11135, 11315, 114793, 114990, 115207, 1192, 1265, 1465, 1627, 1822, 1937, 199731, 207, 2273, 2274, 2316, 23363, 23521, 26012, 26986, 28973, 2934, 302, 308, 3303, 3304, 3482, 351, 3611, 3646, 3688, 3856, 388, 4035, 4082, 4357, 4627, 4736, 4758, 5010, 5052, 51501, 5159, 5339, 5376, 5479, 54806, 55082, 55591, 55679, 55870, 55898, 5605, 567…	7.69795e-07	CLDN11, CAPN1, FHL1, VIM, VEZT, HOMER3, RPL18, CNN2, SLC9A3R2, PABPC1, RPL31, LIMS2, FSCN1, ACTB, TNS1, RPS5, RPL6, RPLP0, RPL3, SYNGR1, MYH9, EIF3E, PPP1R13L, RPS16, RPS19, RABAC1, CADM4, CAV1, SH3PXD2A, RPL19, PMP22, RPL34, CD81, RPS13, PPFIBP1, ATN1, PDGFRB, DBN1, RPL24, RPS15, SPTBN1, FHL2, RPL22, PARK7, ASH1L, PRDX1, PRDX6, SORBS3, RPL5, CALD1, LRP1, OBSL1, RPS10, AHNAK, RPL23, MAP2K2, CDC42…
387	GO:0009986	cell surface	GOCC	298	0.0323568	1.22273	0.00116174	0.00650574	up	10791, 11258, 11331, 114990, 1191, 131566, 1368, 2013, 23654, 302, 307, 308, 3105, 3106, 3107, 3133, 3482, 351, 3572, 3688, 388, 389, 3956, 4059, 4282, 4627, 4638, 4684, 5066, 5159, 5270, 54587, 55959, 5621, 567, 6387, 6678, 684, 6840, 7049, 7057, 7077, 7094, 7145, 80274, 81502, 967, 972	0.00554637	CD74, TIMP2, DCBLD2, MYLK, TGFBR3, TNS1, LGALS1, MYH9, HM13, CXCL12, SPARC, PDGFRB, CLU, BST2, IL6ST, CD63, CPM, SERPINE2, TLN1, DCTN3, THBS1, APP, RHOB, PAM, NCAM1, ITGB1, RHOC, SCUBE1, MXRA8, ANXA5, B2M, VASN, VAMP5, PRNP, ANXA2, BCAM, SULF2, PLXNB2, ANXA4, IGF2R, SVIL, HLA-C, HLA-E, EMP2, PHB2, HLA-B, MIF
613	GO:0030864	cortical actin cytoskeleton	GOCC	41	0.031386	1.21537	0.232133	0.450848	up	1915, 2934, 4627, 6711, 800	0.418972	MYH9, SPTBN1, CALD1, GSN, EEF1A1
557	GO:0009897	external side of plasma membrane	GOCC	71	0.030212	1.20654	0.133892	0.309195	up	308, 3572, 3688, 4059, 4684, 5270, 567, 6387, 7049, 7057, 80274, 972	0.283087	CD74, TGFBR3, CXCL12, IL6ST, SERPINE2, THBS1, NCAM1, ITGB1, SCUBE1, ANXA5, B2M, BCAM
674	GO:0097526	spliceosomal tri-snRNP complex	GOCC	25	0.0299583	1.20464	0.376235	0.617798	up	51691, 57819, 6638	0.584085	LSM8, SNRPN, LSM2
468	GO:0045121	membrane raft	GOCC	158	0.0294907	1.20114	0.031148	0.103621	up	11315, 1509, 2013, 2771, 2817, 284119, 302, 351, 3643, 3688, 3945, 55004, 5538, 5566, 5577, 5621, 6281, 682, 684, 79026, 857, 871, 8837	0.0953772	CFLAR, PRKAR2B, GPC1, PRKACA, CAV1, LDHB, GNAI2, PARK7, CTSD, AHNAK, BST2, PPT1, APP, SERPINH1, LAMTOR1, ITGB1, INSR, PRNP, BSG, CAVIN1, ANXA2, S100A10, EMP2
469	GO:0098857	membrane microdomain	GOCC	159	0.0294211	1.20062	0.0310931	0.103621	up	11315, 1509, 2013, 2771, 2817, 284119, 302, 351, 3643, 3688, 3945, 55004, 5538, 5566, 5577, 5621, 6281, 682, 684, 79026, 857, 871, 8837	0.0953772	CFLAR, PRKAR2B, GPC1, PRKACA, CAV1, LDHB, GNAI2, PARK7, CTSD, AHNAK, BST2, PPT1, APP, SERPINH1, LAMTOR1, ITGB1, INSR, PRNP, BSG, CAVIN1, ANXA2, S100A10, EMP2
632	GO:0000786	nucleosome	GOCC	39	0.029228	1.19918	0.283583	0.520677	up	23522, 3015, 55766, 8364, 8971	0.486143	KAT6B, H2AFZ, H1FX, HIST1H4C, H2AFJ
687	GO:0022624	proteasome accessory complex	GOCC	24	0.0289436	1.19707	0.4049	0.64784	up	5714, 5720, 5721, 7979	0.613568	PSME1, PSMD8, PSME2, SEM1
508	GO:0031301	integral component of organelle membrane	GOCC	113	0.028934	1.19699	0.0733156	0.204432	up	10791, 11041, 125988, 28958, 347734, 5018, 51024, 54543, 5768, 65991, 780776, 79188, 80024, 89941, 91689, 9445	0.189257	SLC8B1, QSOX1, ITM2B, RHOT2, OXA1L, SLC35B2, FUNDC2, TVP23A, VAMP5, TMEM43, B4GAT1, MICOS13, SMDT1, COA3, TOMM7, FIS1
691	GO:0071011	precatalytic spliceosome	GOCC	25	0.0280849	1.19069	0.411753	0.653127	up	57819	0.617937	LSM2
603	GO:0000502	proteasome complex	GOCC	61	0.0274631	1.1861	0.213057	0.423592	up	51035, 5682, 5689, 5692, 5694, 5699, 5714, 5720, 5721, 7979	0.394155	PSMB1, PSME1, PSMD8, PSME2, SEM1, PSMA1, PSMB6, PSMB4, UBXN1, PSMB10
605	GO:1905369	endopeptidase complex	GOCC	61	0.0274631	1.1861	0.213057	0.423592	up	51035, 5682, 5689, 5692, 5694, 5699, 5714, 5720, 5721, 7979	0.394155	PSMB1, PSME1, PSMD8, PSME2, SEM1, PSMA1, PSMB6, PSMB4, UBXN1, PSMB10
564	GO:0005793	endoplasmic reticulum-Golgi intermediate compartment	GOCC	88	0.0271456	1.18376	0.141005	0.319041	up	10945, 10972, 11018, 1522, 24141, 3998, 4924, 57222, 84317, 871, 90411	0.293925	LMAN1, TMED1, CTSZ, NUCB1, KDELR1, ERGIC1, LAMP5, CCDC115, SERPINH1, TMED10, MCFD2
631	GO:0044853	plasma membrane raft	GOCC	48	0.0268177	1.18135	0.281867	0.52037	up	284119, 3643, 5566, 857	0.485074	PRKACA, CAV1, INSR, CAVIN1
526	GO:0031300	intrinsic component of organelle membrane	GOCC	117	0.0267356	1.18075	0.0961896	0.248613	up	10791, 11041, 125988, 28958, 347734, 5018, 51024, 54543, 5768, 65991, 780776, 79188, 80024, 89941, 91689, 9445	0.228386	SLC8B1, QSOX1, ITM2B, RHOT2, OXA1L, SLC35B2, FUNDC2, TVP23A, VAMP5, TMEM43, B4GAT1, MICOS13, SMDT1, COA3, TOMM7, FIS1
595	GO:0030018	Z disc	GOCC	69	0.0264917	1.17896	0.204138	0.414443	up	10273, 103910, 10398, 2274, 23363, 274, 3856, 4660, 5530, 667	0.38569	PPP1R12B, MYL9, STUB1, FHL2, MYL12B, OBSL1, BIN1, PPP3CA, DST, KRT8
431	GO:0005913	cell-cell adherens junction	GOCC	288	0.0263108	1.17764	0.0116213	0.0476191	up	10399, 10848, 11135, 11315, 114793, 114990, 1192, 1265, 1627, 1937, 199731, 2316, 302, 3303, 3646, 3688, 4627, 5052, 5339, 55082, 55898, 56904, 5694, 57175, 6128, 6130, 6138, 6147, 6152, 6159, 6164, 6187, 6231, 6624, 6711, 682, 7094, 79026, 800, 8407, 8496, 85456, 8971, 9045, 9351, 9588, 9973	0.0441014	CNN2, SLC9A3R2, FSCN1, RPL6, MYH9, EIF3E, PPP1R13L, CADM4, RPL34, PPFIBP1, DBN1, RPL24, SPTBN1, PARK7, PRDX1, PRDX6, CALD1, AHNAK, CDC42EP1, ARGLU1, TLN1, UNC45A, RPS2, PSMB6, RPL7A, SH3GLB2, TNKS1BP1, ITGB1, FMNL2, TAGLN2, RPL29, VASN, BSG, CORO1B, CCS, RPL15, PLEC, ANXA2, H1FX, RPL14, FLNA, RPS26, RPL23A, HSPA1A, RACK1, CLIC1, EEF1G
608	GO:0031674	I band	GOCC	72	0.0252315	1.16977	0.21987	0.433293	up	10273, 103910, 10398, 2274, 23363, 274, 3856, 4660, 5530, 667	0.403064	PPP1R12B, MYL9, STUB1, FHL2, MYL12B, OBSL1, BIN1, PPP3CA, DST, KRT8
348	GO:0031975	envelope	GOCC	880	0.0251404	1.1691	6.90361e-05	0.000572744	up	1019, 10202, 10476, 10730, 10975, 11315, 11331, 116540, 1191, 1192, 123096, 125988, 126328, 1327, 1329, 1337, 1345, 1347, 1349, 1351, 140823, 1471, 1537, 1593, 163590, 1727, 203068, 22877, 23345, 23468, 23645, 23770, 23787, 25915, 26012, 2628, 2647, 26517, 27166, 274, 28958, 28959, 28973, 293, 29796, 3030, 307, 3164, 3482, 351, 37, 373156, 3958, 4000, 4129, 4259, 445, 4521, 4697, 4710, 4713, 4714…	0.000502492	PRKAR2B, MRPL43, MRPS24, NDUFB4, MAOB, ACADVL, HADHA, PPP1R15A, BAX, SLC8B1, MRPS33, TYRO3, CBX5, ATP5F1D, NDUFB7, TIMM13, CYB5R3, DHRS2, UQCC1, CST3, FKBP8, NUDT1, TMEM176B, PTGDS, CUEDC2, SLC25A11, MRPL27, MRPL51, COX6A1, COX7A2, PARK7, CLU, NR4A1, MRPS7, CHCHD5, ROMO1, UQCR11, ECSIT, ASS1, SYNE1, COX4I1, COX7B, LGALS3, RAF1, ATP5MC2, BLOC1S1, CDK4, CYP27A1, COX5B, BIN1, YME1L1, MTCH1, SORL1, A…
349	GO:0031967	organelle envelope	GOCC	878	0.0250049	1.16812	7.73469e-05	0.000633868	up	1019, 10202, 10476, 10730, 10975, 11315, 11331, 116540, 1191, 1192, 123096, 125988, 126328, 1327, 1329, 1337, 1345, 1347, 1349, 1351, 140823, 1471, 1537, 1593, 163590, 1727, 203068, 22877, 23345, 23468, 23645, 23770, 23787, 25915, 26012, 2628, 2647, 26517, 27166, 274, 28958, 28959, 28973, 293, 29796, 3030, 307, 3164, 3482, 351, 37, 373156, 3958, 4000, 4129, 4259, 445, 4521, 4697, 4710, 4713, 4714…	0.000553904	PRKAR2B, MRPL43, MRPS24, NDUFB4, MAOB, ACADVL, HADHA, PPP1R15A, BAX, SLC8B1, MRPS33, TYRO3, CBX5, ATP5F1D, NDUFB7, TIMM13, CYB5R3, DHRS2, UQCC1, CST3, FKBP8, NUDT1, TMEM176B, PTGDS, CUEDC2, SLC25A11, MRPL27, MRPL51, COX6A1, COX7A2, PARK7, CLU, NR4A1, MRPS7, CHCHD5, ROMO1, UQCR11, ECSIT, ASS1, SYNE1, COX4I1, COX7B, LGALS3, RAF1, ATP5MC2, BLOC1S1, CDK4, CYP27A1, COX5B, BIN1, YME1L1, MTCH1, SORL1, A…
627	GO:0031225	anchored component of membrane	GOCC	59	0.0249931	1.16803	0.271359	0.506537	up	1368, 2817, 4061, 4684, 5621, 684	0.472484	GPC1, BST2, CPM, NCAM1, LY6E, PRNP
637	GO:0097525	spliceosomal snRNP complex	GOCC	54	0.0249409	1.16766	0.293595	0.533231	up	51691, 51747, 57819, 6638	0.49565	LUC7L3, LSM8, SNRPN, LSM2
724	GO:0035869	ciliary transition zone	GOCC	22	0.0249114	1.16744	0.501997	0.738167	up	54806, 80184	0.700902	AHI1, CEP290
729	GO:0005790	smooth endoplasmic reticulum	GOCC	25	0.0227282	1.15171	0.5188	0.749964	up	10549, 351, 5479	0.715061	PRDX4, APP, PPIB
678	GO:0005811	lipid particle	GOCC	47	0.0226094	1.15086	0.380002	0.619809	up	1727, 302, 3654, 50486, 857	0.587878	CYB5R3, CAV1, G0S2, ANXA2, IRAK1
450	GO:0044433	cytoplasmic vesicle part	GOCC	367	0.0222957	1.14862	0.0186124	0.0683471	up	10791, 10945, 10972, 1175, 1191, 1363, 200734, 22818, 23710, 24141, 2621, 29082, 3105, 3106, 3107, 3133, 351, 3671, 3959, 3998, 4035, 5066, 51706, 567, 5768, 5919, 6233, 6414, 6678, 682, 7057, 7076, 7078, 710, 7114, 7311, 81502, 83871, 857, 8906, 90411, 9145, 94121, 9445, 967, 972, 9749, 9784	0.0626053	CD74, AP2S1, LMAN1, TIMP3, SYNGR1, HM13, TIMP1, SYTL4, KDELR1, CAV1, RARRES2, LGALS3BP, RAB34, CPE, COPZ1, PHACTR2, SPARC, SNX17, QSOX1, CLU, LRP1, LAMP5, ISLR, CD63, ITM2B, THBS1, GABARAPL1, APP, RPS27A, PAM, SERPING1, CYB5R1, B2M, VAMP5, TMED10, BSG, MCFD2, GAS6, SPRED2, HLA-C, HLA-E, TMSB4X, AP1G2, UBA52, HLA-B, SELENOP, CHMP4A
622	GO:0031902	late endosome membrane	GOCC	87	0.0220816	1.14709	0.24622	0.466084	up	10410, 10948, 29082, 302, 388, 51160, 5337, 55004, 93343, 967	0.435544	PLD1, STARD3, CD63, MVB12A, IFITM3, RHOB, LAMTOR1, VPS28, ANXA2, CHMP4A
472	GO:0015629	actin cytoskeleton	GOCC	315	0.0218206	1.14523	0.0325138	0.106582	up	10109, 103910, 10398, 10540, 10627, 1072, 11135, 11258, 1265, 140465, 1612, 1627, 1809, 1915, 2274, 2316, 274, 2934, 3611, 4082, 4627, 4637, 4638, 4660, 51019, 5236, 57175, 59, 644150, 6624, 6711, 6840, 7114, 7169, 7171, 79026, 800, 9168, 9260, 9644	0.0975413	TMSB10, CNN2, MYLK, FSCN1, PPP1R12B, PGM1, MYL6, MYH9, MYL9, MYL12A, ACTA2, SH3PXD2A, DPYSL3, DBN1, SPTBN1, FHL2, MYL12B, WASHC3, WIPF3, CALD1, AHNAK, CDC42EP1, BIN1, DCTN3, GSN, EEF1A1, ARPC2, ILK, TPM4, CORO1B, CFL1, DCTN2, MYL6B, DAPK1, PDLIM7, FLNA, SVIL, TPM2, TMSB4X, MARCKS
680	GO:0030667	secretory granule membrane	GOCC	51	0.0215311	1.14317	0.386636	0.627583	up	10972, 1363, 5066, 51706, 6678, 682, 857, 967, 9749	0.594001	CAV1, CPE, PHACTR2, SPARC, CD63, PAM, CYB5R1, TMED10, BSG
720	GO:0016528	sarcoplasm	GOCC	33	0.0215222	1.14311	0.485754	0.719002	up	2934, 2946, 5339, 7057	0.684682	THBS1, GSN, PLEC, GSTM2
710	GO:0032154	cleavage furrow	GOCC	37	0.0213196	1.14167	0.46529	0.704223	up	11258, 3688, 388, 389, 4627, 4638, 6840	0.668572	MYLK, MYH9, DCTN3, RHOB, ITGB1, RHOC, SVIL
711	GO:0097610	cell surface furrow	GOCC	37	0.0213196	1.14167	0.46529	0.704223	up	11258, 3688, 388, 389, 4627, 4638, 6840	0.668572	MYLK, MYH9, DCTN3, RHOB, ITGB1, RHOC, SVIL
623	GO:0030658	transport vesicle membrane	GOCC	97	0.0209899	1.13933	0.247462	0.467119	up	10972, 1363, 200734, 3105, 3106, 3107, 3133, 3998, 567, 8906, 90411, 9145, 94121, 972	0.436004	CD74, LMAN1, SYNGR1, SYTL4, CPE, B2M, TMED10, MCFD2, SPRED2, HLA-C, HLA-E, AP1G2, HLA-B
772	GO:0046540	U4/U6 x U5 tri-snRNP complex	GOCC	20	0.0208718	1.1385	0.599559	0.797829	up	51691, 57819, 6638	0.771607	LSM8, SNRPN, LSM2
527	GO:0098589	membrane region	GOCC	211	0.0206865	1.13719	0.0961605	0.248613	up	11315, 1175, 1509, 2013, 26020, 2771, 2817, 284119, 302, 351, 3643, 3688, 3945, 4035, 4037, 55004, 5538, 5566, 5577, 5621, 6281, 682, 684, 79026, 857, 871, 8837	0.228386	CFLAR, PRKAR2B, AP2S1, GPC1, PRKACA, CAV1, LDHB, GNAI2, PARK7, CTSD, LRP1, AHNAK, BST2, LRP3, PPT1, APP, SERPINH1, LAMTOR1, ITGB1, INSR, PRNP, BSG, CAVIN1, ANXA2, LRP10, S100A10, EMP2
618	GO:0030176	integral component of endoplasmic reticulum membrane	GOCC	103	0.0206012	1.13659	0.24326	0.46309	up	23770, 284361, 3105, 3106, 3107, 3133, 347734, 51604, 51669, 6238, 7108, 7993, 81502, 8733, 8818, 972	0.433765	CD74, HM13, UBXN8, FKBP8, PIGT, RRBP1, SARAF, DPM2, TM7SF2, SLC35B2, EMC10, GPAA1, HLA-C, HLA-E, HLA-B
476	GO:0005759	mitochondrial matrix	GOCC	356	0.0198495	1.13129	0.041081	0.131981	up	10157, 10202, 10588, 11315, 128240, 1593, 1666, 1716, 2109, 217, 25824, 25828, 2647, 28973, 3028, 3030, 326625, 37, 373156, 4521, 51021, 51081, 51258, 51264, 513, 51373, 51650, 54460, 54948, 6182, 6188, 6296, 64951, 64963, 64976, 65003, 7284, 7417, 78988, 79586, 84545, 85007, 8802, 90480, 92170, 9553	0.120794	ACSM3, AASS, MRPL43, MRPS24, HSD17B10, ACADVL, HADHA, MRPS33, ATP5F1D, TXN2, DHRS2, DECR1, ETFB, NUDT1, MRPL27, ALDH2, MRPL51, DGUOK, PARK7, CHPF, MRPS7, PRDX5, BLOC1S1, CYP27A1, MTHFS, MMAB, MTG1, RPS3, NAXE, SUCLG1, VDAC2, MRPL16, MRPL57, MRPL11, PHYKPL, TUFM, GADD45GIP1, MRPS11, MRPS16, MRPL40, GSTK1, MRPS18B, MRPS17, MRPL33, MRPL12, MRPS21
732	GO:0043195	terminal bouton	GOCC	34	0.019752	1.1306	0.519945	0.749964	up	1808, 351, 3611, 9145	0.715061	DPYSL2, SYNGR1, APP, ILK
481	GO:0000323	lytic vacuole	GOCC	362	0.0194925	1.12878	0.0435191	0.136023	up	10404, 10410, 10577, 10948, 114990, 1175, 119032, 1291, 1471, 1509, 1514, 1522, 1634, 1915, 196463, 2331, 23324, 2495, 2512, 2647, 2817, 29952, 302, 3482, 4035, 4060, 445, 4758, 51374, 5159, 5337, 55004, 5538, 5549, 55652, 5660, 7128, 7311, 79026, 81502, 823, 84317, 84557, 8722, 9322, 9516, 9588, 967, 972	0.125471	DCN, MAN2B2, CAPN1, CD74, AP2S1, GPC1, PLD1, FTL, CTSZ, HM13, CST3, MAP1LC3A, CPQ, PDGFRB, PRDX6, CTSD, TNFAIP3, NPC2, FMOD, LRP1, AHNAK, TRIP10, ASS1, PPT1, STARD3, CTSL, CD63, BLOC1S1, CCDC115, ATRAID, LUM, IFITM3, COL6A1, LAMTOR1, PLBD2, EEF1A1, BORCS7, FTH1, VASN, CTSF, DPP7, ANXA2, PRELP, LITAF, IGF2R, PSAP, SLC48A1, UBA52
482	GO:0005764	lysosome	GOCC	362	0.0194925	1.12878	0.0435191	0.136023	up	10404, 10410, 10577, 10948, 114990, 1175, 119032, 1291, 1471, 1509, 1514, 1522, 1634, 1915, 196463, 2331, 23324, 2495, 2512, 2647, 2817, 29952, 302, 3482, 4035, 4060, 445, 4758, 51374, 5159, 5337, 55004, 5538, 5549, 55652, 5660, 7128, 7311, 79026, 81502, 823, 84317, 84557, 8722, 9322, 9516, 9588, 967, 972	0.125471	DCN, MAN2B2, CAPN1, CD74, AP2S1, GPC1, PLD1, FTL, CTSZ, HM13, CST3, MAP1LC3A, CPQ, PDGFRB, PRDX6, CTSD, TNFAIP3, NPC2, FMOD, LRP1, AHNAK, TRIP10, ASS1, PPT1, STARD3, CTSL, CD63, BLOC1S1, CCDC115, ATRAID, LUM, IFITM3, COL6A1, LAMTOR1, PLBD2, EEF1A1, BORCS7, FTH1, VASN, CTSF, DPP7, ANXA2, PRELP, LITAF, IGF2R, PSAP, SLC48A1, UBA52
703	GO:0016234	inclusion body	GOCC	56	0.0186158	1.12265	0.439785	0.677833	up	10273, 1191, 23741, 3303, 3304, 468, 8106, 93343	0.642317	PABPN1, STUB1, CLU, ATF4, MVB12A, HSPA1B, HSPA1A, EID1
785	GO:0032589	neuron projection membrane	GOCC	21	0.0180545	1.11874	0.646441	0.837073	up	23710, 24141, 468, 5064, 6711	0.806296	PALM, SPTBN1, LAMP5, ATF4, GABARAPL1
599	GO:0005770	late endosome	GOCC	166	0.0178209	1.11712	0.20827	0.420293	up	10410, 10791, 10948, 1471, 1649, 29082, 30061, 302, 3482, 388, 51150, 51160, 5337, 55004, 5605, 684, 7178, 84557, 93343, 967, 972	0.391517	CD74, PLD1, SDF4, CST3, MAP1LC3A, MAP2K2, BST2, STARD3, TPT1, CD63, SLC40A1, MVB12A, IFITM3, RHOB, LAMTOR1, VPS28, VAMP5, DDIT3, ANXA2, IGF2R, CHMP4A
625	GO:0031968	organelle outer membrane	GOCC	130	0.0176752	1.1161	0.268489	0.503852	up	11331, 1727, 22877, 23345, 23645, 4129, 445, 4830, 51024, 517, 54543, 581, 5894, 65991, 7417, 81890, 89941	0.469327	MAOB, PPP1R15A, BAX, CYB5R3, ASS1, SYNE1, RAF1, ATP5MC2, RHOT2, VDAC2, FUNDC2, MLXIP, TOMM7, QTRT1, FIS1, PHB2, NME1
430	GO:0044432	endoplasmic reticulum part	GOCC	752	0.0175961	1.11556	0.0113411	0.0467557	up	100128731, 10423, 10488, 10491, 10550, 10554, 10945, 10952, 10972, 11018, 1277, 1278, 1284, 1289, 1291, 1292, 1522, 163590, 171546, 1727, 200185, 221035, 22818, 2286, 23478, 23480, 23645, 23646, 23770, 25870, 2621, 27173, 284361, 3105, 3106, 3107, 3133, 347734, 3998, 4259, 4779, 51035, 51604, 51669, 51706, 5337, 5351, 5355, 5479, 55850, 5589, 567, 57190, 57222, 5730, 57333, 581, 5833, 6048, 6238,…	0.0434088	CD74, H6PD, USE1, UFD1, LMAN1, PLD1, NFE2L1, PLOD1, PPP1R15A, BAX, TYRO3, SCD, TMED1, XBP1, CYB5R3, CTSZ, HM13, PLP2, CDIPT, UBXN8, PLD3, KDELR1, FKBP8, CAV1, SEC61B, CREB3, PTGDS, COL1A1, COPZ1, SLC39A7, ERGIC1, REEP6, PIGT, RRBP1, SUMF2, REEP5, PRKCSH, COLGALT1, COL5A1, SEC61G, SDF2, SARAF, COL4A2, DPM2, THBS1, SEC11A, MBTPS1, COL6A1, COL6A2, RCN3, MGST3, SLC39A1, ARL6IP5, SERPINH1, TM7SF2, DST…
640	GO:0005741	mitochondrial outer membrane	GOCC	116	0.0173548	1.11388	0.304995	0.548013	up	11331, 1727, 22877, 23645, 4129, 445, 4830, 51024, 517, 54543, 581, 5894, 65991, 7417, 81890, 89941	0.50909	MAOB, PPP1R15A, BAX, CYB5R3, ASS1, RAF1, ATP5MC2, RHOT2, VDAC2, FUNDC2, MLXIP, TOMM7, QTRT1, FIS1, PHB2, NME1
681	GO:0044448	cell cortex part	GOCC	83	0.0173055	1.11354	0.385911	0.627583	up	1915, 2316, 26012, 2934, 2995, 4627, 60, 6711, 7171, 800	0.594001	ACTB, MYH9, SPTBN1, CALD1, GYPC, GSN, EEF1A1, NSMF, TPM4, FLNA
554	GO:0044297	cell body	GOCC	267	0.0172695	1.11329	0.125658	0.294224	up	10399, 10519, 11315, 114327, 128240, 1312, 1363, 1471, 1808, 1809, 203068, 2316, 23710, 25828, 26012, 2771, 3572, 3611, 4035, 445, 4692, 4926, 5066, 51035, 5372, 54407, 5538, 5577, 59, 6001, 6158, 6194, 6770, 7077	0.269527	PRKAR2B, TIMP2, DPYSL2, COMT, EFHC1, TXN2, PMM1, CST3, ACTA2, RPL28, CPE, DPYSL3, GNAI2, PARK7, LRP1, ASS1, PPT1, SLC38A2, IL6ST, RPS6, NUMA1, GABARAPL1, PAM, STAR, RGS10, UBXN1, NAXE, NSMF, ILK, NDN, CIB1, TUBB, FLNA, RACK1
723	GO:0030532	small nuclear ribonucleoprotein complex	GOCC	61	0.0160235	1.10471	0.493315	0.72699	up	51691, 51747, 57819, 6638	0.690952	LUC7L3, LSM8, SNRPN, LSM2
636	GO:0030139	endocytic vesicle	GOCC	151	0.0159227	1.10401	0.287357	0.524283	up	1175, 3105, 3106, 3107, 3133, 3482, 4035, 5337, 567, 6233, 6678, 7311, 83871, 857, 972	0.48787	CD74, AP2S1, PLD1, CAV1, RAB34, SPARC, LRP1, RPS27A, B2M, IGF2R, HLA-C, HLA-E, UBA52, HLA-B
779	GO:0032040	small-subunit processome	GOCC	32	0.0157434	1.10279	0.625688	0.821215	up	10436, 2091, 55272, 6201	0.791468	FBL, EMG1, RPS7, IMP3
651	GO:0019867	outer membrane	GOCC	132	0.0157152	1.10259	0.326042	0.567719	up	11331, 1727, 22877, 23345, 23645, 4129, 445, 4830, 51024, 517, 54543, 581, 5894, 65991, 7417, 81890, 89941	0.527188	MAOB, PPP1R15A, BAX, CYB5R3, ASS1, SYNE1, RAF1, ATP5MC2, RHOT2, VDAC2, FUNDC2, MLXIP, TOMM7, QTRT1, FIS1, PHB2, NME1
764	GO:0005882	intermediate filament	GOCC	42	0.0154879	1.10104	0.583192	0.788541	up	3856, 3858, 4000, 4830, 667, 7431	0.763827	VIM, DST, LMNA, KRT8, KRT10, NME1
598	GO:0099503	secretory vesicle	GOCC	242	0.0151767	1.09891	0.203528	0.414443	up	10567, 10972, 1191, 1277, 1363, 1809, 2621, 30061, 351, 3671, 3959, 4016, 4521, 5066, 51706, 5270, 5538, 55591, 5768, 5919, 6414, 6678, 682, 7057, 7076, 7078, 710, 7114, 7417, 857, 9145, 94121, 967, 9749	0.38569	VEZT, TIMP3, SYNGR1, TIMP1, SYTL4, RABAC1, CAV1, NUDT1, RARRES2, LGALS3BP, COL1A1, CPE, PHACTR2, SPARC, DPYSL3, QSOX1, CLU, ISLR, LOXL1, PPT1, CD63, SERPINE2, THBS1, SLC40A1, APP, PAM, SERPING1, CYB5R1, VDAC2, TMED10, BSG, GAS6, TMSB4X, SELENOP
523	GO:0005911	cell-cell junction	GOCC	452	0.0148219	1.09649	0.0947796	0.248581	up	1019, 10399, 10791, 10848, 11135, 11315, 114793, 114990, 1192, 1265, 1627, 1937, 199731, 207, 2316, 23363, 302, 3303, 351, 3611, 3646, 3688, 3856, 4627, 5010, 5052, 5339, 5376, 54806, 55082, 55870, 55898, 5605, 56904, 5694, 57175, 6128, 6130, 6138, 6147, 6152, 6159, 6164, 6187, 6231, 6624, 6711, 682, 7094, 79026, 800, 8407, 8496, 85456, 8971, 9045, 9260, 9351, 9588, 9973	0.228386	CLDN11, CNN2, SLC9A3R2, FSCN1, RPL6, MYH9, EIF3E, PPP1R13L, CADM4, PMP22, RPL34, PPFIBP1, DBN1, RPL24, SPTBN1, PARK7, ASH1L, PRDX1, PRDX6, CALD1, OBSL1, AHNAK, MAP2K2, CDC42EP1, ARGLU1, CDK4, AHI1, TLN1, UNC45A, RPS2, APP, AKT1, PSMB6, RPL7A, SH3GLB2, TNKS1BP1, ITGB1, FMNL2, TAGLN2, RPL29, ILK, VASN, VAMP5, KRT8, BSG, CORO1B, CCS, RPL15, PLEC, ANXA2, H1FX, RPL14, PDLIM7, FLNA, RPS26, RPL23A, HSPA…
695	GO:0031227	intrinsic component of endoplasmic reticulum membrane	GOCC	107	0.0144935	1.09425	0.416657	0.653573	up	23770, 284361, 3105, 3106, 3107, 3133, 347734, 51604, 51669, 6238, 7108, 7993, 81502, 8733, 8818, 972	0.618714	CD74, HM13, UBXN8, FKBP8, PIGT, RRBP1, SARAF, DPM2, TM7SF2, SLC35B2, EMC10, GPAA1, HLA-C, HLA-E, HLA-B
774	GO:0033116	endoplasmic reticulum-Golgi intermediate compartment membrane	GOCC	51	0.0132333	1.08572	0.609446	0.806196	up	10945, 10972, 11018, 1522, 24141, 3998, 57222, 90411	0.779809	LMAN1, TMED1, CTSZ, KDELR1, ERGIC1, LAMP5, TMED10, MCFD2
804	GO:0060170	ciliary membrane	GOCC	34	0.0131076	1.08487	0.679339	0.85497	up	123016, 9249	0.816853	DHRS3, TTC8
780	GO:0043679	axon terminus	GOCC	50	0.0124929	1.08073	0.634127	0.83067	up	1808, 351, 3611, 6001, 9145	0.799865	DPYSL2, SYNGR1, APP, RGS10, ILK
759	GO:1905368	peptidase complex	GOCC	76	0.0124284	1.0803	0.56014	0.76507	up	51035, 5682, 5689, 5692, 5694, 5699, 5714, 5720, 5721, 7979	0.737989	PSMB1, PSME1, PSMD8, PSME2, SEM1, PSMA1, PSMB6, PSMB4, UBXN1, PSMB10
756	GO:0042470	melanosome	GOCC	90	0.0119919	1.07737	0.54186	0.761556	up	10972, 1509, 191, 302, 3688, 5052, 5479, 682, 9145, 967	0.730195	SYNGR1, AHCY, PRDX1, CTSD, CD63, ITGB1, PPIB, TMED10, BSG, ANXA2
758	GO:0048770	pigment granule	GOCC	90	0.0119919	1.07737	0.54186	0.761556	up	10972, 1509, 191, 302, 3688, 5052, 5479, 682, 9145, 967	0.730195	SYNGR1, AHCY, PRDX1, CTSD, CD63, ITGB1, PPIB, TMED10, BSG, ANXA2
808	GO:0030173	integral component of Golgi membrane	GOCC	38	0.0115681	1.07454	0.701831	0.87095	up	11041, 347734, 5768, 780776	0.830967	QSOX1, SLC35B2, TVP23A, B4GAT1
801	GO:0043204	perikaryon	GOCC	46	0.0114389	1.07368	0.677359	0.85497	up	10399, 26012, 445, 4692, 5066	0.816853	ASS1, PAM, NSMF, NDN, RACK1
661	GO:0030425	dendrite	GOCC	271	0.0110476	1.07107	0.336874	0.574568	up	10399, 10519, 1191, 1312, 1627, 1808, 2316, 23710, 24141, 25828, 26012, 2771, 351, 3572, 3611, 3688, 3908, 4035, 4926, 5064, 51035, 54407, 5538, 5577, 6001, 6158, 6175, 6194, 721, 81858, 91978, 9638	0.534187	PRKAR2B, RPLP0, DPYSL2, COMT, PALM, TXN2, RPL28, DBN1, GNAI2, CLU, LRP1, LAMP5, PPT1, SLC38A2, IL6ST, RPS6, NUMA1, GABARAPL1, TPGS1, APP, RGS10, FEZ1, ITGB1, UBXN1, NSMF, ILK, SHARPIN, CIB1, LAMA2, FLNA, RACK1, C4B
846	GO:0005669	transcription factor TFIID complex	GOCC	20	0.010311	1.06618	0.805353	0.925579	up	2067, 8721	0.901222	ERCC1, EDF1
794	GO:0005798	Golgi-associated vesicle	GOCC	62	0.00983285	1.06301	0.68045	0.85497	up	10945, 10972, 22818, 3482, 4924, 81502, 84317, 8906, 9445	0.816853	HM13, NUCB1, KDELR1, COPZ1, ITM2B, CCDC115, TMED10, IGF2R, AP1G2
730	GO:0005938	cell cortex	GOCC	164	0.0094765	1.06066	0.521718	0.749964	up	1397, 1627, 1915, 2316, 26012, 2934, 2995, 302, 4082, 4627, 4926, 60, 667, 6711, 7171, 800, 857, 9322, 9590	0.715061	ACTB, MYH9, CAV1, DBN1, SPTBN1, CALD1, TRIP10, AKAP12, GYPC, NUMA1, GSN, DST, EEF1A1, NSMF, TPM4, ANXA2, CRIP2, FLNA, MARCKS
792	GO:0005777	peroxisome	GOCC	95	0.00795042	1.05065	0.683213	0.85497	up	10005, 10654, 1891, 25824, 26063, 3615, 373156, 51024, 5605, 7431, 84263	0.816853	VIM, ACOT8, ECH1, HSDL2, PRDX5, MAP2K2, PMVK, IMPDH2, GSTK1, FIS1, DECR2
799	GO:0042579	microbody	GOCC	95	0.00795042	1.05065	0.683213	0.85497	up	10005, 10654, 1891, 25824, 26063, 3615, 373156, 51024, 5605, 7431, 84263	0.816853	VIM, ACOT8, ECH1, HSDL2, PRDX5, MAP2K2, PMVK, IMPDH2, GSTK1, FIS1, DECR2
658	GO:0098796	membrane protein complex	GOCC	636	0.0075614	1.04811	0.331103	0.567719	up	10476, 10791, 10952, 10972, 11315, 1175, 1192, 125988, 126328, 1327, 1329, 1337, 1349, 1351, 171546, 200185, 22818, 23258, 2771, 2790, 2791, 284361, 29082, 293, 29796, 3105, 3106, 3107, 3133, 3482, 3572, 3588, 3643, 3654, 3688, 3856, 4627, 4697, 4710, 4713, 4714, 4715, 4716, 4724, 4725, 4729, 51035, 51079, 51160, 513, 516, 51604, 517, 522, 539, 54539, 54543, 55004, 5566, 567, 581, 6048, 6332, 639…	0.528812	CFLAR, CD74, AP2S1, NDUFB4, TGFBR3, UFD1, PRKACA, BAX, ATP5F1D, NDUFB7, MYH9, HM13, STX10, CAV1, SEC61B, COPZ1, COX6A1, C7, GNAI2, PARK7, PIGT, GNG11, COX4I1, COX7B, IL6ST, ATP5MC2, COX5B, SCN7A, NDUFB10, MVB12A, NDUFB11, NDUFB9, LAMTOR1, ITGB1, ATP5PF, UQCRB, ATP5MC1, CALM3, VPS28, EMC10, UBXN1, SGCB, KRTCAP2, NDUFS4, SPTSSA, VDAC2, NDUFB8, B2M, CACNB3, ATP5PD, NDUFS5, VAMP5, UQCRFS1, SLC25A6, T…
684	GO:0044437	vacuolar part	GOCC	514	0.00730074	1.04642	0.395976	0.63812	up	10410, 10948, 114990, 1175, 119032, 1291, 1509, 1514, 1634, 1915, 196463, 2331, 23324, 23710, 24141, 2647, 2817, 29082, 302, 3105, 3106, 3107, 3133, 3482, 351, 3643, 3654, 388, 4035, 4060, 4758, 51160, 51293, 51374, 5159, 5337, 54741, 55004, 5538, 5549, 55652, 5660, 567, 6233, 7311, 79026, 81502, 84557, 857, 8722, 8906, 93343, 9445, 9516, 967, 972, 9784	0.60417	DCN, MAN2B2, CD74, AP2S1, GPC1, PLD1, HM13, MAP1LC3A, CAV1, PDGFRB, SNX17, CTSD, FMOD, LRP1, AHNAK, LAMP5, PPT1, STARD3, CTSL, CD63, BLOC1S1, ITM2B, ATRAID, GABARAPL1, LUM, MVB12A, IFITM3, COL6A1, APP, RHOB, RPS27A, LAMTOR1, PLBD2, EEF1A1, VPS28, BORCS7, B2M, CD320, VASN, INSR, CTSF, ANXA2, IRAK1, PRELP, LITAF, IGF2R, PSAP, HLA-C, HLA-E, SLC48A1, LEPROT, AP1G2, UBA52, HLA-B, CHMP4A
852	GO:0031228	intrinsic component of Golgi membrane	GOCC	40	0.00725704	1.04613	0.808986	0.925579	up	11041, 347734, 5768, 780776	0.901222	QSOX1, SLC35B2, TVP23A, B4GAT1
849	GO:0005903	brush border	GOCC	55	0.00639311	1.04053	0.803674	0.925579	up	103910, 1192, 4627, 4637, 51181, 5339, 54407	0.901222	MYL6, MYH9, MYL12B, SLC38A2, DCXR, PLEC, CLIC1
848	GO:0005884	actin filament	GOCC	58	0.00603485	1.03822	0.809882	0.925579	up	1809, 2316, 57175, 644150, 6624, 7114, 7171, 9168	0.901222	TMSB10, FSCN1, DPYSL3, WIPF3, TPM4, CORO1B, FLNA, TMSB4X
836	GO:0030662	coated vesicle membrane	GOCC	100	0.00549914	1.03477	0.774443	0.914492	up	10945, 10972, 1175, 22818, 3105, 3106, 3107, 3133, 3998, 567, 8906, 90411, 972	0.888509	CD74, AP2S1, LMAN1, KDELR1, COPZ1, B2M, TMED10, MCFD2, HLA-C, HLA-E, AP1G2, HLA-B
800	GO:0043025	neuronal cell body	GOCC	226	0.00546173	1.03453	0.670904	0.85497	up	10399, 10519, 114327, 1363, 1471, 1808, 2316, 25828, 26012, 3572, 3611, 4035, 445, 4692, 4926, 5066, 51035, 5372, 54407, 5538, 5577, 6001, 6770, 7077	0.816853	PRKAR2B, TIMP2, DPYSL2, EFHC1, TXN2, PMM1, CST3, CPE, LRP1, ASS1, PPT1, SLC38A2, IL6ST, NUMA1, PAM, STAR, RGS10, UBXN1, NSMF, ILK, NDN, CIB1, FLNA, RACK1
879	GO:0001669	acrosomal vesicle	GOCC	44	0.00468369	1.02954	0.87143	0.956864	up	4016, 4521, 55591, 682, 857	0.934094	VEZT, CAV1, NUDT1, LOXL1, BSG
788	GO:0036477	somatodendritic compartment	GOCC	376	0.00449163	1.02831	0.656041	0.846179	up	10399, 10519, 114327, 1191, 1312, 1363, 1471, 1627, 1808, 2316, 23710, 24141, 25828, 26012, 2771, 351, 3572, 3611, 3688, 3908, 4035, 445, 4692, 4926, 5064, 5066, 51035, 5372, 54407, 5538, 5577, 6001, 6158, 6175, 6194, 6770, 7077, 721, 81858, 91978, 9638	0.813637	PRKAR2B, TIMP2, RPLP0, DPYSL2, COMT, EFHC1, PALM, TXN2, PMM1, CST3, RPL28, CPE, DBN1, GNAI2, CLU, LRP1, LAMP5, ASS1, PPT1, SLC38A2, IL6ST, RPS6, NUMA1, GABARAPL1, TPGS1, APP, PAM, STAR, RGS10, FEZ1, ITGB1, UBXN1, NSMF, ILK, SHARPIN, NDN, CIB1, LAMA2, FLNA, RACK1, C4B
746	GO:0016023	cytoplasmic, membrane-bounded vesicle	GOCC	726	0.00446304	1.02812	0.54641	0.761556	up	10133, 10567, 10791, 10945, 10972, 1175, 1191, 1277, 1363, 1509, 1522, 1809, 191, 200734, 22818, 23710, 24141, 25844, 2621, 29082, 29952, 30061, 302, 3105, 3106, 3107, 3133, 3482, 351, 3671, 3688, 3959, 3998, 4016, 4035, 4521, 4758, 4924, 5052, 5064, 5066, 5159, 51604, 51706, 5270, 5337, 5479, 55245, 5538, 55591, 567, 5768, 5919, 6233, 6414, 667, 6678, 682, 7057, 7076, 7078, 710, 7114, 7311, 7417…	0.732948	CD74, VEZT, AP2S1, LMAN1, PLD1, PALM, TIMP3, SYNGR1, UQCC1, CTSZ, HM13, AHCY, TIMP1, SYTL4, NUCB1, RABAC1, KDELR1, CAV1, NUDT1, RARRES2, LGALS3BP, COL1A1, RAB34, CPE, COPZ1, PHACTR2, SPARC, DPYSL3, PDGFRB, SNX17, QSOX1, PRDX1, PRDX6, CTSD, CLU, OPTN, LRP1, PIGT, LAMP5, ISLR, LOXL1, PPT1, CD63, SERPINE2, ITM2B, CCDC115, YIPF3, THBS1, SLC40A1, GABARAPL1, APP, RPS27A, PAM, SERPING1, ITGB1, DST, CYB5…
738	GO:0097708	intracellular vesicle	GOCC	794	0.0044413	1.02799	0.531804	0.758753	up	10133, 10567, 10791, 10945, 10972, 1175, 1191, 1277, 1363, 1509, 1522, 1809, 191, 200734, 2013, 22818, 23710, 24141, 25824, 25844, 2621, 29082, 29952, 30061, 302, 3105, 3106, 3107, 3133, 3482, 3485, 351, 3671, 3688, 3959, 3998, 4016, 4035, 4521, 4758, 4924, 5052, 5064, 5066, 5159, 51604, 51706, 5270, 5337, 5479, 55245, 5538, 55591, 567, 5768, 5919, 6233, 6414, 667, 6678, 682, 7057, 7076, 7078, 71…	0.724298	CD74, VEZT, AP2S1, LMAN1, PLD1, PALM, TIMP3, SYNGR1, UQCC1, CTSZ, HM13, AHCY, MAP1LC3A, TIMP1, SYTL4, NUCB1, TBC1D17, RABAC1, KDELR1, CAV1, NUDT1, RARRES2, LGALS3BP, COL1A1, RAB34, CPE, COPZ1, PHACTR2, SPARC, DPYSL3, PDGFRB, SNX17, IGFBP2, QSOX1, PRDX1, PRDX6, CTSD, CLU, OPTN, LRP1, PIGT, LAMP5, PRDX5, ISLR, LOXL1, PPT1, CD63, SERPINE2, ITM2B, CCDC115, YIPF3, THBS1, SLC40A1, GABARAPL1, APP, RPS27…
741	GO:0005730	nucleolus	GOCC	707	0.00440629	1.02776	0.556434	0.761556	up	1019, 10436, 10521, 11224, 1153, 1915, 2091, 2316, 23318, 23468, 23521, 25828, 25873, 260294, 26517, 29997, 30834, 3431, 3692, 37, 4035, 4736, 4781, 4782, 51119, 51329, 51333, 51386, 55011, 55272, 55651, 5591, 5930, 6122, 6124, 6125, 6129, 6130, 6133, 6135, 6141, 6143, 6144, 6147, 6164, 6188, 6189, 6194, 6201, 6203, 6204, 6205, 6207, 6208, 6223, 6228, 6230, 6231, 6233, 6430, 64976, 6711, 6902, 74…	0.735288	RPL18, ZNRD1, ACADVL, CBX5, CIRBP, TIMM13, EIF3L, DDX17, RPL3, TXN2, SRSF5, PIH1D1, FBL, RPS19, NOP53, NSUN5P2, EDF1, RPL19, RPL34, RPS13, ABHD14B, SPTBN1, RPS25, RPL21, RBBP6, RPL5, LRP1, RPS10, RPL23, SBDS, EMG1, RPL36, TUT4, CDK4, SP110, RPL35, RPS6, NFIC, RPS11, RPL13A, RPL11, RPS27A, RPS3A, NHP2, RPL7, NFIB, RPL7A, RPS3, EEF1A1, RPL9, RPS14, TAF1D, WEE1, MIDN, RPS9, TBCA, RPS7, RPL4, IMP3, Z…
877	GO:0032587	ruffle membrane	GOCC	54	0.00439039	1.02766	0.86676	0.95359	up	10519, 1072, 1915, 3688, 4830, 51177, 6188, 7094	0.932109	PLEKHO1, TLN1, RPS3, ITGB1, EEF1A1, CFL1, CIB1, NME1
751	GO:0031410	cytoplasmic vesicle	GOCC	793	0.00432796	1.02726	0.542712	0.761556	up	10133, 10567, 10791, 10945, 10972, 1175, 1191, 1277, 1363, 1509, 1522, 1809, 191, 200734, 2013, 22818, 23710, 24141, 25824, 25844, 2621, 29082, 29952, 30061, 302, 3105, 3106, 3107, 3133, 3482, 3485, 351, 3671, 3688, 3959, 3998, 4016, 4035, 4521, 4758, 4924, 5052, 5064, 5066, 5159, 51604, 51706, 5270, 5337, 5479, 55245, 5538, 55591, 567, 5768, 5919, 6233, 6414, 667, 6678, 682, 7057, 7076, 7078, 71…	0.730195	CD74, VEZT, AP2S1, LMAN1, PLD1, PALM, TIMP3, SYNGR1, UQCC1, CTSZ, HM13, AHCY, MAP1LC3A, TIMP1, SYTL4, NUCB1, TBC1D17, RABAC1, KDELR1, CAV1, NUDT1, RARRES2, LGALS3BP, COL1A1, RAB34, CPE, COPZ1, PHACTR2, SPARC, DPYSL3, PDGFRB, SNX17, IGFBP2, QSOX1, PRDX1, PRDX6, CTSD, CLU, OPTN, LRP1, PIGT, LAMP5, PRDX5, ISLR, LOXL1, PPT1, CD63, SERPINE2, ITM2B, CCDC115, YIPF3, THBS1, SLC40A1, GABARAPL1, APP, RPS27…
823	GO:0044440	endosomal part	GOCC	318	0.00380725	1.02394	0.72831	0.882196	up	10410, 10948, 1175, 1514, 24141, 29082, 302, 3105, 3106, 3107, 3133, 351, 3643, 3654, 388, 51160, 51293, 5337, 54741, 55004, 55652, 567, 6233, 7311, 857, 8906, 93343, 9445, 967, 9784	0.848739	AP2S1, PLD1, CAV1, SNX17, LAMP5, STARD3, CTSL, CD63, ITM2B, MVB12A, IFITM3, APP, RHOB, RPS27A, LAMTOR1, VPS28, B2M, CD320, INSR, ANXA2, IRAK1, HLA-C, HLA-E, SLC48A1, LEPROT, AP1G2, UBA52, HLA-B, CHMP4A
842	GO:0098552	side of membrane	GOCC	194	0.00374161	1.02353	0.788428	0.921433	up	1915, 2771, 2790, 2791, 29082, 308, 3105, 3106, 3107, 3133, 3572, 3688, 3718, 4059, 4684, 4924, 5270, 5605, 567, 6277, 6387, 7049, 7057, 80274, 81502, 84299, 972	0.89847	CD74, TGFBR3, HM13, NUCB1, JAK3, CXCL12, GNAI2, MAP2K2, GNG11, IL6ST, SERPINE2, THBS1, MIEN1, NCAM1, ITGB1, EEF1A1, SCUBE1, ANXA5, B2M, BCAM, S100A6, HLA-C, HLA-E, HLA-B, GNG10, CHMP4A
886	GO:0044452	nucleolar part	GOCC	57	0.00371134	1.02333	0.884482	0.960593	up	2091, 30834, 51386, 55272, 55651, 79101	0.939251	ZNRD1, EIF3L, FBL, NHP2, TAF1D, IMP3
790	GO:0098805	whole membrane	GOCC	917	0.00290008	1.01819	0.664605	0.853948	up	10410, 10945, 10948, 10972, 11315, 11331, 114990, 1175, 119032, 1291, 1363, 1509, 1727, 1915, 200734, 2013, 22818, 22877, 23345, 23645, 23710, 24141, 26020, 26063, 2647, 2771, 2817, 284119, 29082, 302, 3105, 3106, 3107, 3133, 3482, 351, 3615, 3643, 3654, 3688, 388, 3945, 3998, 4035, 4037, 4129, 445, 4758, 4830, 5066, 51024, 51160, 51293, 51374, 517, 51706, 5337, 54543, 54741, 55004, 5538, 55652, …	0.816853	CFLAR, PRKAR2B, CD74, AP2S1, GPC1, MAOB, PRKACA, LMAN1, PLD1, PPP1R15A, BAX, CYB5R3, SYNGR1, HM13, MAP1LC3A, SYTL4, KDELR1, CAV1, RAB34, CPE, COPZ1, LDHB, PHACTR2, SPARC, GNAI2, SNX17, PARK7, CTSD, LRP1, AHNAK, LAMP5, MAP2K2, BST2, ASS1, LRP3, SYNE1, PPT1, STARD3, RAF1, ATP5MC2, CD63, BLOC1S1, ITM2B, ATRAID, GABARAPL1, RHOT2, MVB12A, IFITM3, COL6A1, APP, RHOB, RPS27A, PAM, SERPINH1, LAMTOR1, ITGB…
902	GO:0044815	DNA packaging complex	GOCC	45	0.0028067	1.0176	0.92246	0.977065	up	23522, 3015, 55766, 8364, 8971	0.961437	KAT6B, H2AFZ, H1FX, HIST1H4C, H2AFJ
913	GO:0030315	T-tubule	GOCC	25	0.00270021	1.01692	0.944314	0.982227	up	274, 784, 79026	0.972796	AHNAK, BIN1, CACNB3
885	GO:0034399	nuclear periphery	GOCC	104	0.00269417	1.01688	0.887435	0.960593	up	1051, 1072, 11331, 1822, 26012, 3856, 4000, 468, 4926, 6678, 7041	0.939251	ATN1, SPARC, ATF4, NUMA1, TGFB1I1, LMNA, NSMF, KRT8, CEBPB, CFL1, PHB2
858	GO:0010008	endosome membrane	GOCC	301	0.0026172	1.0164	0.816929	0.930084	up	10410, 10948, 1175, 24141, 29082, 302, 3105, 3106, 3107, 3133, 3643, 3654, 388, 51160, 51293, 5337, 54741, 55004, 55652, 567, 6233, 7311, 857, 8906, 93343, 9445, 967, 9784	0.902346	AP2S1, PLD1, CAV1, SNX17, LAMP5, STARD3, CD63, ITM2B, MVB12A, IFITM3, RHOB, RPS27A, LAMTOR1, VPS28, B2M, CD320, INSR, ANXA2, IRAK1, HLA-C, HLA-E, SLC48A1, LEPROT, AP1G2, UBA52, HLA-B, CHMP4A
818	GO:0005794	Golgi apparatus	GOCC	960	0.00237313	1.01486	0.717698	0.875305	up	10109, 10133, 10139, 10404, 10423, 10519, 10567, 10791, 10945, 10972, 11018, 11041, 11135, 113201, 1191, 126003, 1277, 1363, 140606, 1522, 1622, 1634, 2013, 22818, 22836, 23258, 2331, 23345, 23363, 23645, 23710, 25844, 2621, 2634, 2734, 28, 2817, 29952, 30815, 3105, 3106, 3107, 3133, 3340, 347734, 3482, 3489, 351, 3998, 4060, 4245, 4684, 4924, 4926, 5066, 51150, 51643, 5337, 54741, 54928, 55004, …	0.840786	RHBDD2, DCN, CD74, AKR7A2, GPC1, NDST1, LMAN1, PLD1, ITM2A, SDF4, PPP1R15A, GLG1, TMED1, CTSZ, ARFRP1, HM13, CDIPT, CPQ, IMPAD1, NUCB1, STX10, RABAC1, KDELR1, CAV1, PTGDS, COL1A1, RAB34, CPE, COPZ1, SLC39A7, ERGIC1, SNX17, QSOX1, ASH1L, CLU, FMOD, OPTN, CHPF, OBSL1, TRIP10, MAP2K2, CDC42EP1, BST2, SYNE1, PPT1, MGAT1, RAF1, ITM2B, CCDC115, YIPF3, NUMA1, SORL1, GABARAPL1, LUM, MBTPS1, APP, PSMB6, P…
917	GO:1990391	DNA repair complex	GOCC	33	0.00198128	1.01239	0.953202	0.986795	up	2067, 286257, 5591	0.976482	ERCC1, PAXX, PRKDC
914	GO:0031256	leading edge membrane	GOCC	88	0.00148118	1.00925	0.943153	0.982227	up	10519, 1072, 1915, 23710, 24141, 3688, 468, 4830, 5064, 51177, 6188, 6711, 7094	0.972796	PLEKHO1, PALM, SPTBN1, LAMP5, ATF4, TLN1, GABARAPL1, RPS3, ITGB1, EEF1A1, CFL1, CIB1, NME1
923	GO:0044304	main axon	GOCC	30	0.00141056	1.0088	0.968289	0.991905	up	274, 351, 6711	0.983799	SPTBN1, BIN1, APP
874	GO:0005773	vacuole	GOCC	824	0.0012293	1.00767	0.861739	0.952449	up	10109, 10133, 10404, 10410, 10577, 10791, 10948, 114990, 1175, 119032, 1291, 1471, 1509, 1514, 1522, 1634, 1649, 1915, 196463, 2331, 23324, 23710, 24141, 2495, 2512, 2647, 2817, 29082, 29952, 30061, 302, 3105, 3106, 3107, 3133, 3482, 351, 3643, 3654, 3688, 388, 4035, 4060, 4123, 445, 4758, 4924, 51019, 51150, 51160, 51293, 51374, 5159, 5178, 5337, 53917, 54741, 54940, 55004, 5538, 5549, 55652, 56…	0.932109	DCN, MAN2B2, CAPN1, CD74, AP2S1, GPC1, PLD1, SDF4, FTL, CTSZ, HM13, CST3, MAP1LC3A, SYTL4, CPQ, NUCB1, TBC1D17, CAV1, OCIAD1, PDGFRB, SNX17, PRDX6, CTSD, TNFAIP3, NPC2, WASHC3, FMOD, OPTN, LRP1, AHNAK, TRIP10, LAMP5, MAP2K2, BST2, ASS1, PPT1, STARD3, TPT1, CTSL, CD63, BLOC1S1, ITM2B, CCDC115, SORL1, ATRAID, SLC40A1, GABARAPL1, LUM, MAN2C1, MVB12A, IFITM3, COL6A1, APP, RHOB, RPS27A, LAMTOR1, ITGB1…
881	GO:0005789	endoplasmic reticulum membrane	GOCC	668	0.00120054	1.00749	0.877291	0.957044	up	100128731, 10423, 10488, 10550, 10554, 10945, 10952, 10972, 11018, 163590, 171546, 1727, 200185, 221035, 22818, 2286, 23478, 23480, 23645, 23646, 23770, 27173, 284361, 3105, 3106, 3107, 3133, 347734, 3998, 4259, 4779, 51035, 51604, 51669, 51706, 5337, 5351, 5355, 55850, 57190, 57222, 5730, 581, 5833, 6048, 6238, 6319, 6388, 667, 6746, 6748, 7108, 7301, 7353, 7494, 7922, 7993, 81502, 8396, 857, 87…	0.934094	CD74, USE1, UFD1, LMAN1, PLD1, NFE2L1, PLOD1, PPP1R15A, BAX, TYRO3, SCD, TMED1, XBP1, CYB5R3, HM13, PLP2, CDIPT, UBXN8, PLD3, KDELR1, FKBP8, CAV1, SEC61B, CREB3, PTGDS, COPZ1, SLC39A7, ERGIC1, REEP6, PIGT, RRBP1, SEC61G, SDF2, SARAF, DPM2, SEC11A, MBTPS1, MGST3, SLC39A1, ARL6IP5, TM7SF2, DST, SLC35B2, CYB5R1, EMC10, UBXN1, SELENON, DHRS3, KRTCAP2, SSR2, SPTSSA, REEP3, TOR1AIP2, TMED10, FKBP2, MCF…
920	GO:0016363	nuclear matrix	GOCC	84	0.00113794	1.0071	0.957362	0.987971	up	1051, 1072, 11331, 1822, 26012, 3856, 4926, 6678, 7041	0.977169	ATN1, SPARC, NUMA1, TGFB1I1, NSMF, KRT8, CEBPB, CFL1, PHB2
892	GO:0042175	nuclear outer membrane-endoplasmic reticulum membrane network	GOCC	680	0.00102317	1.00638	0.894505	0.961772	up	100128731, 10423, 10488, 10550, 10554, 10945, 10952, 10972, 11018, 163590, 171546, 1727, 200185, 221035, 22818, 2286, 23345, 23478, 23480, 23645, 23646, 23770, 27173, 284361, 3105, 3106, 3107, 3133, 347734, 3998, 4259, 4779, 51035, 51604, 51669, 51706, 5337, 5351, 5355, 55850, 57190, 57222, 5730, 581, 5833, 6048, 6238, 6319, 6388, 667, 6746, 6748, 7108, 7301, 7353, 7494, 7922, 7993, 81502, 8396, …	0.941138	CD74, USE1, UFD1, LMAN1, PLD1, NFE2L1, PLOD1, PPP1R15A, BAX, TYRO3, SCD, TMED1, XBP1, CYB5R3, HM13, PLP2, CDIPT, UBXN8, PLD3, KDELR1, FKBP8, CAV1, SEC61B, CREB3, PTGDS, COPZ1, SLC39A7, ERGIC1, REEP6, PIGT, RRBP1, SYNE1, SEC61G, SDF2, SARAF, DPM2, SEC11A, MBTPS1, MGST3, SLC39A1, ARL6IP5, TM7SF2, DST, SLC35B2, CYB5R1, EMC10, UBXN1, SELENON, DHRS3, KRTCAP2, SSR2, SPTSSA, REEP3, TOR1AIP2, TMED10, FKB…
931	GO:0005905	clathrin-coated pit	GOCC	49	0.000490917	1.00306	0.985956	0.997835	up	1175, 26020, 351, 4035, 4037	0.992663	AP2S1, LRP1, LRP3, APP, LRP10
936	GO:0044291	cell-cell contact zone	GOCC	42	0.000267939	1.00167	0.992907	0.998835	up	10791, 23363, 3688, 79026	0.996616	OBSL1, AHNAK, ITGB1, VAMP5
935	GO:0005791	rough endoplasmic reticulum	GOCC	44	0.000154193	1.00096	0.995824	0.998835	up	10952, 351, 4924, 5351, 5730, 6748, 81502	0.996616	PLOD1, HM13, NUCB1, SEC61B, PTGDS, APP, SSR4
937	GO:0044431	Golgi apparatus part	GOCC	595	-3.49487e-05	0.999783	0.996616	0.998835	down	10040, 10066, 10071, 10125, 10228, 10237, 10313, 10342, 10396, 10466, 10483, 10678, 10717, 10802, 10955, 10959, 11014, 11113, 11282, 11320, 11345, 114805, 122553, 128344, 1315, 143187, 1453, 146664, 148789, 163, 164, 166929, 1718, 2131, 22796, 22820, 22878, 22908, 22926, 22937, 23163, 23256, 23268, 23673, 23760, 2527, 2530, 258010, 25843, 26003, 26056, 26119, 26286, 26511, 26958, 27032, 27236, 27…	0.996616	ICA1, AP2B1, ATP2C1, FUT8, GABARAPL2, CUL3, RAB27B, VAMP3, ATP2C2, GOLGA5, CDC42, NCK2, MGAT4A, NSF, KLHL20, RBFOX1, PSEN1, CD59, SCAMP1, TMED2, NSFL1C, SPG21, SCFD1, SH3GLB1, PCSK5, RAB36, GNPNAT1, VRK1, TRIP11, SEC23B, SLC35A2, NDFIP2, SMPD3, XYLT1, SYT17, AP3B2, RAB11A, RAB2A, NCALD, SH3GL2, DNMBP, GBF1, GOSR2, CYTH1, CHIC2, PPP6R3, GOLT1B, FIG4, GOLPH3, SEC24A, TFG, SCAP, GORASP1, MOB4, UXS1,…
922	GO:0043005	neuron projection	GOCC	568	-0.000339733	0.997891	0.96786	0.991905	down	100, 1012, 10160, 1020, 10228, 10243, 10300, 10458, 10891, 10947, 11130, 11141, 1136, 1139, 115, 127933, 143187, 1453, 1496, 1515, 153090, 1630, 1739, 1740, 1756, 1826, 2046, 2185, 22849, 22866, 22941, 22974, 23034, 23064, 23108, 23191, 23426, 23613, 23705, 23762, 24137, 25793, 25843, 25861, 25983, 26047, 26052, 26119, 2617, 26230, 267, 26985, 26999, 27020, 27124, 27252, 2825, 2890, 2895, 2898, 2…	0.983799	PAFAH1B1, CDKL5, ELOVL5, SAMD4A, RTN4R, VAMP3, CYFIP2, CTNNA2, RAB27A, PFN2, AP3M2, CDC42, EPHA8, TP63, NSF, DLG1, KLHL20, CTTNBP2, SYNJ2, CHRNA3, KCNN2, PSEN1, GSK3B, MTMR2, AURKA, TPX2, KIF4A, WHRN, MAPK1, FBXO7, NEFH, HIF1A, ZMYND8, EEA1, CDK16, ARHGEF7, RNF40, AP3B2, RAB11A, HOMER2, CALB1, NEFM, SLC17A7, ANKRD27, GARS, APBA1, SETX, CPEB3, WFS1, PPARGC1A, TRPV4, FXR1, STAT1, MOB4, RGS2, PTBP2,…
928	GO:0032153	cell division site	GOCC	45	-0.000611757	0.996205	0.983295	0.996643	down	10426, 1894, 27229, 29127, 382, 4221, 440145, 51474, 54443, 5501, 55165, 5898, 84440, 84930, 8766, 989	0.992234	RALA, ANLN, LIMA1, RAB11A, ECT2, MASTL, SEPTIN7, TUBGCP3, RAB11FIP4, MEN1, TUBGCP4, CEP55, RACGAP1, ARF6, PPP1CC, MZT1
929	GO:0032155	cell division site part	GOCC	45	-0.000611757	0.996205	0.983295	0.996643	down	10426, 1894, 27229, 29127, 382, 4221, 440145, 51474, 54443, 5501, 55165, 5898, 84440, 84930, 8766, 989	0.992234	RALA, ANLN, LIMA1, RAB11A, ECT2, MASTL, SEPTIN7, TUBGCP3, RAB11FIP4, MEN1, TUBGCP4, CEP55, RACGAP1, ARF6, PPP1CC, MZT1
926	GO:0014704	intercalated disc	GOCC	30	-0.000862363	0.994655	0.980776	0.996643	down	10052, 1495, 1499, 1739, 3728, 481, 6546, 7533, 87	0.992234	CTNNA1, ACTN1, DLG1, YWHAH, ATP1B1, CTNNB1, JUP, GJC1, SLC8A1
916	GO:0030427	site of polarized growth	GOCC	103	-0.00110725	0.993143	0.954489	0.986795	down	1020, 10300, 1826, 2185, 22941, 23064, 25861, 26230, 267, 27124, 2932, 3831, 4747, 5015, 5048, 5663, 57451, 57580, 57698, 58155, 59341, 60412, 65078, 6792, 6809, 7074, 801, 805, 8239, 8826, 90060, 9585	0.976482	PAFAH1B1, CDKL5, RTN4R, PSEN1, GSK3B, WHRN, SETX, TRPV4, PTBP2, PTK2B, PREX1, USP9X, KLC1, EXOC4, KIF20B, IQGAP1, KATNB1, CALM2, TENM2, TIAM2, CCDC120, TIAM1, AMFR, SHANK2, CDK5, OTX2, STX3, DSCAM, INPP5J, SHTN1, CALM1, NEFL
905	GO:0005765	lysosomal membrane	GOCC	219	-0.00116704	0.992774	0.93051	0.979535	down	114876, 118426, 121260, 1497, 153129, 157753, 161, 163, 164, 206358, 221955, 23274, 23385, 26985, 27074, 2767, 2773, 2822, 284129, 286410, 29919, 29988, 3326, 4646, 4864, 4905, 4948, 51382, 51552, 51606, 51622, 526, 528, 54468, 55016, 55207, 55255, 55315, 55737, 55788, 5663, 56674, 57192, 57231, 57521, 57617, 5826, 5862, 5878, 6272, 64114, 65082, 6845, 84925, 8546, 8763, 8774, 9550	0.965295	AP2B1, CLEC16A, CTNS, ATP6V1H, GNAI3, VPS35, NSF, LAMP3, PSEN1, GNA11, MCOLN1, HSP90AB1, ATP6V1D, ATP11C, OCA2, VPS18, RAB2A, RAB5C, GPLD1, RAB14, ABCD4, CCZ1, SLC36A1, VAMP7, AP3B1, ARL8B, SORT1, NAPG, SNX14, CD164, TMBIM1, SLC2A8, ATP6V1G1, SLC49A4, SLC15A4, VPS33A, OSBPL1A, RMC1, NPC1, RPTOR, MARCH1, ATP6V1B2, ATP6V1C1, NCSTN, WDR41, DAGLB, MIOS, TMEM74, BORCS5, AP1G1, LMBRD1, TMEM9B, SLC38A9,…
911	GO:0098852	lytic vacuole membrane	GOCC	219	-0.00116704	0.992774	0.93051	0.979535	down	114876, 118426, 121260, 1497, 153129, 157753, 161, 163, 164, 206358, 221955, 23274, 23385, 26985, 27074, 2767, 2773, 2822, 284129, 286410, 29919, 29988, 3326, 4646, 4864, 4905, 4948, 51382, 51552, 51606, 51622, 526, 528, 54468, 55016, 55207, 55255, 55315, 55737, 55788, 5663, 56674, 57192, 57231, 57521, 57617, 5826, 5862, 5878, 6272, 64114, 65082, 6845, 84925, 8546, 8763, 8774, 9550	0.965295	AP2B1, CLEC16A, CTNS, ATP6V1H, GNAI3, VPS35, NSF, LAMP3, PSEN1, GNA11, MCOLN1, HSP90AB1, ATP6V1D, ATP11C, OCA2, VPS18, RAB2A, RAB5C, GPLD1, RAB14, ABCD4, CCZ1, SLC36A1, VAMP7, AP3B1, ARL8B, SORT1, NAPG, SNX14, CD164, TMBIM1, SLC2A8, ATP6V1G1, SLC49A4, SLC15A4, VPS33A, OSBPL1A, RMC1, NPC1, RPTOR, MARCH1, ATP6V1B2, ATP6V1C1, NCSTN, WDR41, DAGLB, MIOS, TMEM74, BORCS5, AP1G1, LMBRD1, TMEM9B, SLC38A9,…
909	GO:0043209	myelin sheath	GOCC	131	-0.0014325	0.991137	0.933806	0.979535	down	10015, 10576, 10935, 10963, 10989, 1739, 22948, 23176, 23236, 25927, 2665, 292, 3313, 3419, 3710, 382, 4744, 4747, 481, 4905, 526, 5728, 5898, 60412, 6389, 64398, 7345, 7416, 7430, 7532, 83700, 8774, 9118, 966, 9948, 998	0.966457	SLC25A5, RALA, GDI2, CDC42, WDR1, MPP5, SDHA, NSF, DLG1, CD59, EZR, ITPR3, NEFH, HSPA9, CNRIP1, EXOC4, IMMT, NAPG, ATP1B1, ATP6V1B2, INA, CCT5, UCHL1, SEPTIN8, ARF6, PRDX3, JAM3, CCT2, IDH3A, STIP1, YWHAG, PDCD6IP, PTEN, PLCB1, VDAC1, NEFL
889	GO:0098797	plasma membrane protein complex	GOCC	223	-0.00186472	0.988478	0.88848	0.960593	down	10052, 10580, 1136, 1138, 1139, 1495, 1499, 161, 163, 1739, 1740, 1756, 1804, 2185, 22801, 22908, 22941, 23630, 26047, 26119, 2773, 2890, 2895, 2898, 2900, 2904, 329, 3597, 3676, 3728, 3756, 3763, 3790, 4688, 481, 486, 5144, 54331, 55799, 5663, 57463, 57582, 5826, 58513, 6000, 64241, 7187, 7188, 7189, 775, 801, 80333, 805, 8301, 836, 91, 9254, 9568, 9630, 9779	0.939251	AP2B1, CACNA2D2, CTNNA1, GNAI3, PICALM, DLG1, CHRNA3, PSEN1, TRAF5, SORBS1, KCNT1, BIRC2, PDE4D, ITGA4, NCF2, ABCD4, PTK2B, EPS15L1, DPP6, TRAF3, TBC1D5, IL13RA1, ACVR1B, GABBR2, FXYD2, ITGA11, ATP1B1, KCNH1, ABCG8, CALM2, GRIK4, DLG2, CACNA1C, GRID2, GRIA1, GNA14, CACNA2D3, KCNJ6, LDLRAP1, SHANK2, CASP3, GRIK2, CTNNB1, CHRNA5, KCNS3, JUP, CNTNAP2, TRAF6, CHRNA7, KCNE5, AMIGO1, RGS7, GJC1, AP2A2,…
899	GO:0001726	ruffle	GOCC	115	-0.00192927	0.988082	0.916614	0.974628	down	10458, 10630, 11252, 154796, 23189, 23191, 23586, 26084, 27124, 27131, 382, 4289, 4646, 4651, 51429, 526, 5420, 54869, 54997, 57403, 5756, 57669, 5879, 59338, 59341, 64419, 6792, 7074, 7430, 81930, 87, 8826, 8874	0.959851	CDKL5, ACTN1, TESC, SNX5, EZR, PACSIN2, ARHGEF7, KANK1, DDX58, PLEKHA1, TRPV4, ARHGEF26, EPB41L5, KIF18A, RAB22A, AMOT, PODXL, MKLN1, SNX9, EPS8L1, RAC1, IQGAP1, MYO10, ATP6V1B2, TWF1, TIAM1, PDPN, MTMR14, ARF6, BAIAP2, INPP5J, MYO6, CYFIP1
864	GO:0005774	vacuolar membrane	GOCC	453	-0.00204976	0.987342	0.828134	0.931215	down	10040, 10066, 10226, 11252, 11345, 114876, 114883, 117584, 1183, 118426, 121260, 137492, 143187, 1497, 153129, 157753, 161, 163, 164, 2046, 206358, 2209, 221955, 22863, 23163, 23207, 23274, 23385, 23673, 25978, 26056, 26060, 26985, 27074, 27131, 2767, 2773, 2822, 284129, 286410, 29110, 29919, 29988, 3326, 3756, 382, 4646, 4864, 4905, 4948, 4952, 51100, 51324, 51382, 51534, 51552, 51606, 51622, 52…	0.907881	AP2B1, VTA1, ATP6V0A1, GABARAPL2, CLEC16A, CTNS, RAB27B, ATP6V1H, GNAI3, VPS35, RAB27A, EPHA8, CLCN4, NSF, TSG101, LAMP3, PSEN1, CHMP2B, SCAMP1, MTMR2, GNA11, SNX5, SPG21, MCOLN1, RFFL, HSP90AB1, SH3GLB1, PACSIN2, GNPNAT1, ATP6V1D, ATP11C, EEA1, NDFIP2, RAB11A, OCA2, VPS18, RAB2A, PLIN3, GOSR2, RAB5C, UBE2D3, RAB5B, GPLD1, SNX3, FIG4, SNX4, PLEKHB2, PLEKHM2, STX12, OSBPL9, RAB14, ABCD4, OCRL, CCZ…
915	GO:0000307	cyclin-dependent protein kinase holoenzyme complex	GOCC	30	-0.0021785	0.986553	0.951696	0.986795	down	1017, 1025, 1163, 22938, 894, 902	0.976482	SNW1, CCND2, CDK2, CCNH, CDK9, CKS1B
845	GO:0000139	Golgi membrane	GOCC	476	-0.0022262	0.98626	0.809321	0.925579	down	10066, 10125, 10228, 10237, 10313, 10342, 10396, 10466, 10483, 10678, 10717, 10802, 10955, 10959, 11014, 11282, 11320, 11345, 114805, 122553, 1315, 143187, 1453, 146664, 148789, 164, 166929, 1718, 2131, 22796, 22820, 22908, 22926, 22937, 23256, 23673, 23760, 2527, 2530, 258010, 25843, 26003, 26056, 26286, 26958, 27032, 27236, 2800, 2801, 283987, 2890, 3382, 375, 375056, 377, 400, 4905, 51026, 511…	0.901222	ICA1, ATP2C1, FUT8, GABARAPL2, CUL3, VAMP3, ATP2C2, GOLGA5, CDC42, MGAT4A, NSF, PSEN1, CD59, TMED2, SCFD1, SH3GLB1, RAB36, GNPNAT1, TRIP11, SEC23B, SLC35A2, NDFIP2, SMPD3, XYLT1, RAB2A, SH3GL2, GBF1, GOSR2, CYTH1, PPP6R3, GOLT1B, FIG4, GOLPH3, SEC24A, TFG, SCAP, GORASP1, MOB4, UXS1, GORASP2, DHCR24, KLHL12, BLZF1, STX12, ATF6, RAB14, PPP6C, ARL1, SLC35B1, ATP8A1, A4GALT, COPB1, CBFA2T3, FUT5, SER…
868	GO:0030659	cytoplasmic vesicle membrane	GOCC	317	-0.00229072	0.985865	0.838243	0.93727	down	10059, 10227, 10257, 10396, 10483, 10802, 10947, 10959, 10971, 11252, 127833, 1315, 143187, 161, 163, 1638, 164, 2209, 22820, 22905, 22937, 23120, 2571, 25932, 25977, 26056, 26119, 26958, 26985, 27074, 27131, 2890, 29988, 30011, 310, 3382, 3710, 3801, 4481, 4646, 4948, 4952, 51429, 51552, 5289, 535, 54503, 55016, 55647, 55776, 56776, 57030, 57221, 57403, 57410, 5799, 5873, 5874, 5880, 5898, 6396,…	0.916699	ICA1, AP2B1, RALA, ATP6V0A1, MSR1, RAB27B, VAMP3, ATG5, RAB27A, AP3M2, CAMK2A, EPN2, PICALM, STXBP2, LAMP3, PIK3C3, DCT, CADPS2, CD59, SCAMP1, TMED2, DNM1L, SNX5, NECAP1, ITPR3, PACSIN2, TRIP11, SEC23B, AP3B2, RAB11A, OCA2, NCALD, SLC17A7, ANKRD27, SH3GL2, GOSR2, MFSD10, SAYSD1, ARFGEF3, SEC24A, SCAP, ATP10B, RAB14, OCRL, RAB22A, VAMP7, ATP8A1, ABCC4, YWHAH, BAIAP2L2, RAC2, GAD1, COPB1, SNX9, TBC…
891	GO:0030426	growth cone	GOCC	100	-0.00264839	0.983676	0.893579	0.961772	down	1020, 10300, 1826, 2185, 22941, 23064, 25861, 26230, 267, 27124, 2932, 3831, 4747, 5015, 5048, 5663, 57451, 57580, 57698, 58155, 59341, 60412, 65078, 6792, 6809, 7074, 801, 805, 8239, 8826, 90060, 9585	0.941138	PAFAH1B1, CDKL5, RTN4R, PSEN1, GSK3B, WHRN, SETX, TRPV4, PTBP2, PTK2B, PREX1, USP9X, KLC1, EXOC4, KIF20B, IQGAP1, KATNB1, CALM2, TENM2, TIAM2, CCDC120, TIAM1, AMFR, SHANK2, CDK5, OTX2, STX3, DSCAM, INPP5J, SHTN1, CALM1, NEFL
882	GO:0036464	cytoplasmic ribonucleoprotein granule	GOCC	126	-0.00276491	0.982964	0.875629	0.957044	down	10146, 11022, 11273, 113802, 127933, 149041, 163589, 1653, 1656, 167227, 197135, 1977, 219988, 221400, 23019, 23034, 23185, 23644, 26065, 2886, 29883, 3192, 406, 4076, 4691, 4848, 4849, 51441, 54514, 55095, 55124, 55239, 56165, 56478, 5879, 5936, 6311, 64506, 6606, 6780, 80153, 84944, 84962, 8826, 8878, 9118, 9271, 9575, 998	0.934094	SAMD4A, EDC4, CDC42, DDX1, OGFOD1, CNOT3, TDRD1, LARP4B, DDX6, CNOT2, NCL, STAU1, CNOT1, PIWIL1, AJUBA, ARNTL, CLOCK, CAPRIN1, RC3H1, RAC1, IQGAP1, GRB7, MAEL, G3BP1, INA, EIF4E, UHMK1, DDX4, HNRNPU, SQSTM1, HENMT1, TDRD5, PATL1, ATXN2L, SMN1, DCP2, RBM4, SAMD4B, EDC3, TDRD6, TDRKH, EIF4ENIF1, PIWIL2, YTHDF2, CNOT7, ATXN2, CPEB1, PATL2, LSM14A
860	GO:0031252	cell leading edge	GOCC	264	-0.00281432	0.982662	0.818828	0.930084	down	10096, 1020, 10458, 10630, 11252, 1139, 1495, 1496, 1499, 154796, 1639, 2054, 2185, 23189, 23191, 23586, 25800, 26047, 26084, 26230, 27124, 27131, 2890, 29959, 375, 3756, 382, 4289, 4646, 4651, 5048, 51429, 526, 5420, 54828, 54869, 54997, 55604, 55740, 57403, 5756, 57669, 57698, 5879, 5880, 59338, 59341, 64419, 6453, 65059, 6643, 6792, 6809, 6845, 6870, 7074, 7408, 7430, 81565, 81930, 8291, 84962…	0.902346	PAFAH1B1, CDKL5, CTNNA1, CTNNA2, CDC42, ACTN1, CARMIL1, TESC, SNX5, EZR, PACSIN2, ARHGEF7, KANK1, DDX58, PLEKHA1, GBF1, TRPV4, STX2, WASF1, ARHGEF26, ACTR3, EPB41L5, NRBP1, PTK2B, KIF18A, RAB22A, VAMP7, VASP, AMOT, RAC2, PODXL, MKLN1, AJUBA, SNX9, EPS8L1, DYSF, RAC1, IQGAP1, BCAS3, SLC39A6, LMO4, KCNH1, ARF1, MYO10, TIAM2, ATP6V1B2, TWF1, ENAH, GRIA1, TIAM1, PDPN, MTMR14, CDK5, ARF6, NDEL1, STX3,…
807	GO:0005768	endosome	GOCC	558	-0.00342246	0.978955	0.690312	0.859055	down	10040, 10066, 1017, 10226, 10228, 1027, 10612, 10717, 10935, 11252, 114876, 114883, 117584, 1183, 123606, 137492, 143187, 1497, 153020, 153129, 161, 163, 1636, 164, 1730, 201294, 2046, 2209, 22906, 23043, 23080, 23163, 23207, 23245, 23274, 23295, 23426, 23673, 2534, 256227, 25930, 25978, 26047, 26056, 26060, 26119, 26750, 27074, 27131, 27229, 27342, 286410, 2890, 29110, 375, 3756, 382, 3833, 4864…	0.819515	VPS50, AP2B1, VTA1, FYN, RABEP1, ATP6V0A1, CLEC16A, CTNS, RAB27B, VAMP3, VPS35, RAB27A, EPHA8, CLCN4, TSG101, PTPN23, ANKRD13A, LAMP3, PIK3C3, CARMIL1, CHMP2B, SCAMP1, WDFY1, MTMR2, SNX5, SPG21, MCOLN1, EZR, RFFL, UNC13D, MAPK1, PACSIN2, GNPNAT1, TM9SF4, ATP11C, EEA1, NDFIP2, MGRN1, USP10, ZP2, VPS35L, RAB11A, OCA2, VPS18, ANKRD27, PLIN3, AVL9, STEAP1B, GOSR2, RAB5C, UBE2D3, TRIM3, CDKN1B, RAB5B,…
878	GO:0034708	methyltransferase complex	GOCC	88	-0.00354256	0.978225	0.867029	0.95359	down	11091, 2146, 23054, 26121, 3720, 4221, 4591, 51605, 54881, 55006, 5501, 5928, 5929, 5931, 6045, 6880, 9734	0.932109	JARID2, HDAC9, TRMT6, RBBP7, PRPF31, EZH2, TRIM37, RBBP5, RNF2, MEN1, TEX10, RBBP4, TRMT61B, PPP1CC, WDR5, NCOA6, TAF9
847	GO:0005681	spliceosomal complex	GOCC	168	-0.00385833	0.976307	0.802016	0.925579	down	103, 10569, 10625, 10946, 10992, 11338, 1655, 1659, 1665, 22938, 24144, 24148, 26121, 27336, 3183, 3185, 3192, 51322, 51340, 51645, 51729, 55015, 55094, 55109, 55131, 5546, 56259, 56949, 58155, 6936, 7536, 8220, 8449, 8458, 84991, 8539, 8559, 9129, 9343, 9410, 9716	0.901222	GCFC2, AQR, SNRNP40, U2AF2, DHX8, GPATCH1, XAB2, WBP11, SF3B2, HNRNPC, WAC, ESS2, TFIP11, SNW1, PRPF6, CRNKL1, HTATSF1, PRPF31, RBM28, DDX5, EFTUD2, DHX15, IVNS1ABP, TTF2, PRPF3, PTBP2, CTNNBL1, RBM17, PPIL1, PRCC, HNRNPU, ADAR, AGGF1, SLU7, PRPF18, API5, SF1, HNRNPF, SF3A3, PRPF39, DHX16
853	GO:0031253	cell projection membrane	GOCC	159	-0.00393468	0.975844	0.803518	0.925579	down	10227, 10630, 11136, 11252, 1139, 1499, 1739, 1756, 22941, 23189, 23586, 25800, 26047, 27241, 2890, 2978, 3326, 3756, 382, 4646, 4651, 54084, 5420, 54869, 54997, 5756, 57669, 585, 5879, 59338, 59341, 65009, 6792, 6870, 7074, 7399, 7408, 7430, 79583, 948	0.901222	CDKL5, SLC7A9, USH2A, GUCA1A, DLG1, TESC, EZR, HSP90AB1, PACSIN2, NDRG4, KANK1, DDX58, PLEKHA1, MFSD10, TRPV4, EPB41L5, BBS9, VASP, PODXL, EPS8L1, CD36, RAC1, BBS4, SLC39A6, KCNH1, MYO10, TWF1, GRIA1, TIAM1, SHANK2, PDPN, ARF6, CTNNB1, TACR3, CNTNAP2, CHRNA7, TSPEAR, MYO6, DMD, TMEM231
833	GO:0099568	cytoplasmic region	GOCC	206	-0.00408688	0.974921	0.76924	0.91361	down	100, 10097, 10640, 10947, 11034, 120, 126206, 127933, 1499, 2037, 2185, 219736, 23245, 24137, 25924, 26985, 2898, 29091, 29899, 29959, 3091, 382, 3993, 4289, 4354, 441161, 4646, 4651, 4691, 4747, 4843, 5048, 5357, 54443, 54874, 55763, 5594, 5664, 56776, 5899, 59341, 60412, 6792, 7111, 7189, 7345, 7430, 79816, 80306, 8120, 81565, 830, 83872, 83992, 84260, 84612, 8546, 8874, 9001, 9099, 9833, 989	0.887124	PAFAH1B1, NOS2, CDKL5, ANLN, USP2, EXOC5, AP3M2, LLGL2, CTTNBP2, EPB41L2, KIF4A, EXOC1, EZR, MAPK1, HIF1A, ARHGEF7, AP3B2, TLE6, TRPV4, NCL, NRBP1, MED28, PLS1, PTK2B, GPSM2, SEPTIN7, PARD6B, DSTN, MKLN1, MPP1, EXOC4, AP3B1, TMOD1, FNBP1L, ACTR2, TCHP, HMCN1, PSEN2, RALB, MYO10, ASTN2, ADD3, UHMK1, UCHL1, FMN2, GRIK2, MELK, ARF6, STOX1, NDEL1, CTNNB1, STXBP6, MYRIP, NLRP5, HAP1, TRAF6, AP3M1, MYO…
810	GO:0012506	vesicle membrane	GOCC	331	-0.00408987	0.974903	0.711439	0.874016	down	10059, 10227, 10257, 10396, 10483, 10802, 10947, 10959, 10971, 11252, 127833, 1315, 143187, 161, 163, 1638, 164, 2209, 22820, 22905, 22937, 23120, 2571, 25932, 25977, 26056, 26060, 26119, 26958, 26985, 27074, 27131, 2890, 29988, 30011, 310, 3382, 3710, 3801, 4481, 4646, 4948, 4952, 51429, 51552, 5289, 535, 54503, 55016, 55647, 55776, 56776, 57030, 57221, 57403, 57410, 5799, 5873, 5874, 5880, 5898…	0.840103	ICA1, AP2B1, RALA, ATP6V0A1, MSR1, RAB27B, VAMP3, ATG5, RAB27A, AP3M2, CAMK2A, NCK2, EPN2, PICALM, STXBP2, LAMP3, PIK3C3, DCT, CADPS2, CD59, SCAMP1, TMED2, DNM1L, SNX5, NECAP1, ITPR3, PACSIN2, TRIP11, SEC23B, AP3B2, RAB11A, OCA2, NCALD, SLC17A7, ANKRD27, SH3GL2, GOSR2, MFSD10, SAYSD1, ARFGEF3, SEC24A, SCAP, ATP10B, RAB14, OCRL, RAB22A, VAMP7, ATP8A1, ABCC4, YWHAH, BAIAP2L2, RAC2, GAD1, COPB1, SNX…
900	GO:0016235	aggresome	GOCC	24	-0.00412566	0.974687	0.918818	0.975428	down	221044, 23594, 29979, 4591, 51622, 5663, 8878	0.959895	PSEN1, ORC6, TRIM37, CCZ1, UBQLN1, SQSTM1, UCMA
872	GO:0005776	autophagosome	GOCC	69	-0.00439652	0.973047	0.854294	0.947336	down	11345, 143187, 157753, 22863, 23032, 29979, 4943, 51100, 5289, 5305, 57617, 5899, 64771, 65082, 79837, 8031, 8678, 8878, 9001, 94241, 9474, 9779	0.929672	GABARAPL2, ATG5, TBC1D25, USP33, PIK3C3, SH3GLB1, VPS18, BECN1, ATG14, TBC1D5, UBQLN1, VPS33A, RALB, PIP4K2A, VTI1A, SQSTM1, TMEM74, TP53INP1, PIP4K2C, HAP1, ILRUN, NCOA4
893	GO:0000791	euchromatin	GOCC	29	-0.00475827	0.970862	0.897425	0.96337	down	10891, 1499, 1788, 29128, 6045, 6908, 6932	0.941978	TCF7, PPARGC1A, TBP, DNMT3A, RNF2, CTNNB1, UHRF1
775	GO:0048471	perinuclear region of cytoplasm	GOCC	453	-0.00488017	0.970127	0.608607	0.806196	down	10049, 10059, 1012, 10207, 1022, 10228, 10483, 10523, 10562, 10802, 10868, 10920, 10955, 11190, 114569, 140578, 143187, 1453, 1499, 1739, 1796, 1977, 2009, 2181, 2185, 221044, 23026, 23032, 23108, 23191, 23368, 23560, 25780, 2580, 25843, 25924, 25932, 26031, 26052, 26234, 267, 26999, 27074, 2720, 27252, 2800, 2932, 29959, 29979, 320, 3301, 340719, 375, 3756, 377, 4085, 4172, 4591, 4646, 4745, 484…	0.779809	PAFAH1B1, NOS2, USP2, MYO16, RAD51, CYFIP2, EML1, OSBPL3, ARHGAP10, PICALM, DLG1, KLHL20, TPD52, USP33, LAMP3, GSK3B, CHERP, DNAJA1, DNM1L, AURKA, PPP1R13B, EZR, SEC23B, NXT2, MOSPD1, PHEX, NDFIP2, OLFM4, RAB11A, PTN, DNAJB6, EIF4H, APBA1, GTPBP4, RAD51C, TRIM37, MCM3, SEC24A, FXR1, NRBP1, DOK1, STAT1, MOB4, ODC1, TSNAX, CDC20, FBXL5, SET, RAB14, PTK2B, LRAT, ACSL3, PREX1, VAMP7, CEP250, HECTD3, …
880	GO:0005637	nuclear inner membrane	GOCC	35	-0.00527813	0.967731	0.87543	0.957044	down	10269, 199953, 23306, 26049, 3756, 5664, 7112	0.934094	ZMPSTE24, TMPO, KCNH1, PSEN2, NEMP1, TMEM201, FAM169A
854	GO:0071013	catalytic step 2 spliceosome	GOCC	87	-0.00536847	0.967187	0.802031	0.925579	down	10569, 10946, 10992, 1655, 1659, 22938, 24144, 24148, 3183, 3185, 3192, 51340, 51645, 55094, 56949, 8220, 9343, 9410, 9716	0.901222	AQR, SNRNP40, DHX8, GPATCH1, XAB2, SF3B2, HNRNPC, ESS2, TFIP11, SNW1, PRPF6, CRNKL1, DDX5, EFTUD2, PPIL1, HNRNPU, SLU7, HNRNPF, SF3A3
862	GO:1902911	protein kinase complex	GOCC	69	-0.00559211	0.965844	0.816046	0.930084	down	1017, 1022, 1025, 10580, 10935, 1163, 2071, 22938, 2965, 51422, 51719, 5563, 5564, 5571, 5573, 5576, 83667, 894, 902, 91, 9779, 9821	0.902346	RB1CC1, SORBS1, SNW1, PRKAG2, PRKAR1A, GTF2H1, PRKAB1, PRKAR2A, CCND2, CDK2, SESN2, TBC1D5, CDK7, CCNH, ACVR1B, CAB39, CDK9, PRKAA2, ERCC3, PRDX3, CKS1B, PRKAG1
844	GO:0098862	cluster of actin-based cell projections	GOCC	78	-0.00599637	0.963421	0.79122	0.92149	down	10059, 10096, 10227, 11136, 120, 22941, 2314, 257629, 25861, 3326, 3710, 4354, 4643, 51473, 51474, 5357, 54084, 7399, 7430, 830, 87, 9455, 948, 9497, 9732	0.89847	SLC7A9, SLC4A7, USH2A, LIMA1, ACTN1, DNM1L, EZR, WHRN, HSP90AB1, ITPR3, HOMER2, MFSD10, ACTR3, PLS1, DOCK4, MPP1, CD36, DCDC2, ADD3, MYO1E, SHANK2, ANKS4B, TSPEAR, FLII, CAPZA2
876	GO:0005684	U2-type spliceosomal complex	GOCC	30	-0.00613066	0.962617	0.866473	0.95359	down	10992, 11338, 1665, 24144, 26121, 27336, 55015, 6936, 8559	0.932109	GCFC2, U2AF2, SF3B2, TFIP11, HTATSF1, PRPF31, DHX15, PRPF18, PRPF39
871	GO:0005801	cis-Golgi network	GOCC	36	-0.00628772	0.961678	0.850291	0.94602	down	10745, 11014, 23256, 2801, 3985, 5295, 57410, 8729, 9321, 9950	0.927591	GOLGA5, SCFD1, TRIP11, GBF1, PHTF1, KDELR2, SCYL1, PIK3R1, GOLGA2, LIMK2
875	GO:0016529	sarcoplasmic reticulum	GOCC	29	-0.00646737	0.960605	0.861701	0.952449	down	10523, 3710, 57338, 818	0.932109	CHERP, ITPR3, CAMK2G, JPH3
856	GO:0008287	protein serine/threonine phosphatase complex	GOCC	44	-0.00683056	0.958439	0.821054	0.930084	down	29966, 5501, 5504, 5515, 5520, 5521, 5525, 5534, 57718, 9878	0.902346	PPP2R5A, TOX4, PPP2CA, PPP4R4, PPP2R2B, PPP1R2, PPP1CC, STRN3, PPP3R1, PPP2R2A
863	GO:1903293	phosphatase complex	GOCC	44	-0.00683056	0.958439	0.821054	0.930084	down	29966, 5501, 5504, 5515, 5520, 5521, 5525, 5534, 57718, 9878	0.902346	PPP2R5A, TOX4, PPP2CA, PPP4R4, PPP2R2B, PPP1R2, PPP1CC, STRN3, PPP3R1, PPP2R2A
787	GO:0030027	lamellipodium	GOCC	132	-0.0079282	0.951923	0.651755	0.842268	down	10096, 1020, 10630, 1495, 1496, 1499, 154796, 2054, 2185, 23191, 25800, 26230, 29959, 4651, 5420, 54997, 55604, 55740, 57698, 5879, 5880, 59341, 6453, 65059, 6643, 6809, 6845, 7408, 8291, 84962, 8874, 8936	0.810586	CTNNA1, CTNNA2, CARMIL1, TESC, ARHGEF7, TRPV4, STX2, WASF1, ACTR3, NRBP1, PTK2B, VAMP7, VASP, AMOT, RAC2, PODXL, AJUBA, DYSF, RAC1, SLC39A6, MYO10, TIAM2, ENAH, PDPN, CDK5, STX3, CTNNB1, RAPH1, SHTN1, SNX2, ITSN1, CYFIP1
817	GO:0097223	sperm part	GOCC	75	-0.00853968	0.948313	0.713838	0.874016	down	11057, 1495, 152006, 154865, 158297, 1656, 29127, 3074, 3326, 3815, 4688, 4957, 55329, 56164, 6103, 8878, 9321, 9899	0.840241	CTNNA1, HEXB, HSP90AB1, TRIP11, DDX6, NCF2, ODF2, RNF38, MNS1, ABHD2, SAXO1, RPGR, KIT, SQSTM1, RACGAP1, IQUB, SV2B, STK31
831	GO:0005881	cytoplasmic microtubule	GOCC	45	-0.00887458	0.946341	0.767816	0.91361	down	11004, 26586, 283987, 4281, 5048, 51512, 51626, 54828, 58477, 59341, 79884, 9545	0.887124	PAFAH1B1, GTSE1, MID1, RAB3D, TRPV4, CKAP2, DYNC2LI1, BCAS3, KIF2C, SRPRB, MAP9, HID1
768	GO:0035770	ribonucleoprotein granule	GOCC	134	-0.00933363	0.943645	0.594077	0.793677	down	10146, 11022, 11273, 113802, 127933, 149041, 163589, 1653, 1656, 167227, 197135, 1977, 219988, 221400, 22907, 23019, 23034, 23185, 23644, 26065, 2886, 29883, 3192, 406, 4076, 4691, 4848, 4849, 51441, 54514, 55095, 55124, 55239, 56165, 56478, 5879, 5936, 6311, 64506, 6606, 6780, 80153, 8087, 84944, 84962, 8826, 8878, 9118, 9271, 9575, 998	0.769009	SAMD4A, EDC4, CDC42, DDX1, OGFOD1, CNOT3, TDRD1, LARP4B, DDX6, CNOT2, FXR1, NCL, STAU1, CNOT1, PIWIL1, AJUBA, DHX30, ARNTL, CLOCK, CAPRIN1, RC3H1, RAC1, IQGAP1, GRB7, MAEL, G3BP1, INA, EIF4E, UHMK1, DDX4, HNRNPU, SQSTM1, HENMT1, TDRD5, PATL1, ATXN2L, SMN1, DCP2, RBM4, SAMD4B, EDC3, TDRD6, TDRKH, EIF4ENIF1, PIWIL2, YTHDF2, CNOT7, ATXN2, CPEB1, PATL2, LSM14A
820	GO:0044306	neuron projection terminus	GOCC	57	-0.00942924	0.943085	0.724658	0.880597	down	10228, 143187, 1756, 2898, 5217, 5799, 6809, 7345, 793, 81532, 9810	0.846706	PFN2, RNF40, CALB1, STX6, VTI1A, UCHL1, PTPRN2, GRIK2, STX3, DMD
717	GO:0030133	transport vesicle	GOCC	228	-0.00958398	0.942178	0.477509	0.71308	down	10059, 10066, 10226, 10483, 10802, 10959, 11014, 127833, 1315, 143187, 201294, 2054, 22820, 22937, 23335, 25924, 26056, 26119, 26958, 2801, 2890, 29988, 320, 3382, 51124, 51138, 5127, 51305, 51324, 51552, 51760, 54432, 54843, 57030, 57221, 5799, 5870, 5873, 5874, 59349, 6272, 6396, 6721, 6809, 6845, 6854, 7039, 7416, 79666, 81555, 81565, 81615, 8224, 83988, 83992, 84079, 8766, 8898, 9001, 9276, 9…	0.679532	ICA1, RAB27B, VAMP3, YIPF1, GOLGA5, RAB27A, CTTNBP2, CD59, SCAMP1, TMED2, MTMR2, DNM1L, SPG21, WDR7, UNC13D, TRIP11, SEC23B, CDK16, SYT17, RAB11A, NCALD, SLC17A7, ANKRD27, PLIN3, RAB3D, APBA1, GOSR2, STX2, ARFGEF3, SEC24A, SCAP, KLHL12, RAB14, VAMP7, COPB1, IER3IP1, SORT1, RAB11FIP5, KDELR2, SLC2A8, SYTL2, COPS4, SCAMP2, SYT2, YIPF5, VTI1A, TMEM163, PTPRN2, GRIA1, SEC13, SYN2, LDLRAP1, COPG2, TGF…
830	GO:0031463	Cul3-RING ubiquitin ligase complex	GOCC	40	-0.00974333	0.941246	0.76049	0.907725	down	11146, 114818, 23276, 23510, 27252, 55975, 571, 57563, 59349, 64410, 83892, 8452	0.881612	CUL3, KLHL20, KCTD10, KLHL18, KLHL12, KLHL29, KLHL7, KLHL8, BACH1, GLMN, KCTD2, KLHL25
718	GO:0031965	nuclear membrane	GOCC	207	-0.01001	0.939687	0.479767	0.714863	down	10017, 10269, 10762, 113878, 129401, 199953, 204219, 221264, 23108, 23133, 23236, 23306, 23534, 23560, 23636, 253782, 26031, 26049, 2643, 27346, 3710, 3756, 3842, 3843, 4646, 5048, 51514, 53371, 54881, 54980, 55706, 55746, 55787, 5663, 5664, 57122, 6049, 6272, 64782, 7112, 79647, 79902, 80321, 8315, 83990, 894, 9118, 9330, 9538, 9670, 9688, 9818, 9821, 9972	0.680564	PAFAH1B1, RB1CC1, NDC1, TNPO3, IPO5, NUP133, OSBPL3, PSEN1, TNPO1, ZMPSTE24, TXLNG, BRAP, DTX2, NUP50, ITPR3, NUP93, GTPBP4, TMEM97, NUP107, CEP70, C2orf42, IPO13, CCND2, GTF3C3, TMPO, NUP153, NUP85, RNF6, GCH1, RAP1GAP2, SORT1, BRIP1, TEX10, BCL2L10, NUP54, NUP58, KCNH1, DTL, PSEN2, INA, EI24, CERS3, AK9, NUP35, NEMP1, CERS6, PHF8, AKIRIN1, AEN, PLCB1, TMEM201, MYO6, FAM169A, NUP62
586	GO:0097458	neuron part	GOCC	759	-0.0101372	0.938944	0.181709	0.383209	down	100, 10059, 1012, 10160, 1020, 10228, 10243, 10300, 10458, 10891, 10947, 11113, 11130, 11141, 1136, 1139, 115, 127833, 127933, 143187, 1453, 1496, 1515, 153090, 1630, 1739, 1740, 1756, 1826, 2046, 2054, 2185, 22849, 22866, 22941, 22974, 23034, 23064, 23108, 23191, 23245, 23335, 23426, 23613, 23705, 23762, 24137, 2534, 2571, 25793, 25843, 25861, 25924, 25983, 26047, 26052, 26119, 2617, 26230, 267,…	0.354246	ICA1, PAFAH1B1, CDKL5, FYN, ELOVL5, SAMD4A, NRXN3, LRRC7, SLC4A7, RTN4R, USH2A, GUCA1A, VAMP3, CYFIP2, CTNNA2, SMARCD1, RAB27A, PFN2, AP3M2, CAMK2A, CDC42, EPHA8, TP63, PICALM, NSF, DLG1, KLHL20, CTTNBP2, SYNJ2, SMARCA2, CHRNA3, KCNN2, PSEN1, CADPS2, GSK3B, NUFIP1, SCAMP1, MTMR2, DNM1L, AURKA, GNA11, TPX2, KIF4A, WDR7, WHRN, ITPR3, MAPK1, FBXO7, NEFH, HIF1A, ZMYND8, EEA1, CDK16, ARHGEF7, EEF2K, S…
709	GO:0005667	transcription factor complex	GOCC	215	-0.0102	0.938578	0.463449	0.704223	down	1017, 1022, 10481, 10625, 11036, 142, 1499, 1869, 2034, 2071, 22938, 23028, 23054, 23314, 25942, 2625, 2649, 27097, 2958, 2965, 2976, 3091, 406, 4087, 430, 4773, 4802, 4862, 51176, 51616, 51741, 5308, 5316, 6497, 6617, 6665, 6774, 6875, 6877, 6880, 6908, 6932, 7027, 8464, 84864, 84962, 8543, 8626, 9015, 902, 9079, 9329, 9330, 9519, 9575, 9734	0.668572	KDM1A, SNAPC1, TBPL1, HDAC9, NFYC, TP63, TCF7, SNW1, HIF1A, NFATC2, E2F1, GATA3, GTF2H1, TBP, GTF3C2, EPAS1, IVNS1ABP, GTF3C3, SATB2, CDK2, GTF3C4, SOX15, AJUBA, ARNTL, CDK7, CCNH, CLOCK, TAF5L, LEF1, GTF2A2, TAF4B, LMO4, TAF1A, PARP1, NR6A1, TAF5, SKI, HOXB13, PKNOX1, ERCC3, PITX2, CTNNB1, STAT3, SIN3A, LDB2, NPAS2, RIOX2, SMAD2, ASCL2, WWOX, TAF9B, SUPT3H, TFDP1, NCOA6, GTF2A1L, TAF9
814	GO:0032580	Golgi cisterna membrane	GOCC	51	-0.0103474	0.937719	0.715341	0.874016	down	10959, 23256, 2527, 2530, 25843, 2800, 2801, 55204, 55790, 6272, 64083, 80146, 81555, 8853, 9334	0.840241	FUT8, TMED2, SCFD1, GOLPH3, MOB4, UXS1, FUT5, SORT1, GOLGA1, GOLPH3L, YIPF5, CSGALNACT1, ASAP2, B4GALT5, GOLGA2
802	GO:0044438	microbody part	GOCC	64	-0.0104315	0.937229	0.680691	0.85497	down	11001, 2181, 3295, 3416, 3417, 375, 4257, 5193, 55825, 5825, 5826, 5828, 7265, 84896	0.816853	MGST1, PEX12, TTC1, PECR, ABCD3, ABCD4, IDE, ACSL3, HSD17B4, ATAD1, IDH1, SLC27A2, ARF1, PEX2
803	GO:0044439	peroxisomal part	GOCC	64	-0.0104315	0.937229	0.680691	0.85497	down	11001, 2181, 3295, 3416, 3417, 375, 4257, 5193, 55825, 5825, 5826, 5828, 7265, 84896	0.816853	MGST1, PEX12, TTC1, PECR, ABCD3, ABCD4, IDE, ACSL3, HSD17B4, ATAD1, IDH1, SLC27A2, ARF1, PEX2
783	GO:0031513	nonmotile primary cilium	GOCC	75	-0.0109269	0.934348	0.641373	0.835276	down	22920, 22941, 25924, 27241, 2767, 2978, 4952, 51473, 55812, 585, 5873, 6103, 6903, 7399, 79583, 79600, 9657, 989	0.804433	SPATA7, USH2A, GUCA1A, RAB27A, KIFAP3, GNA11, OCRL, BBS9, SEPTIN7, TBCC, BBS4, DCDC2, RPGR, SHANK2, MYRIP, IQCB1, TCTN1, TMEM231
733	GO:0043235	receptor complex	GOCC	130	-0.0114156	0.931515	0.523412	0.749964	down	10154, 10580, 1136, 1138, 1139, 117584, 1739, 1740, 2066, 2185, 22801, 22908, 22941, 2567, 2861, 2890, 2895, 2898, 2900, 2904, 329, 342372, 3597, 3676, 3710, 4306, 4916, 53353, 57192, 5799, 64241, 65981, 7099, 7187, 7188, 7189, 7436, 91, 91584, 9568, 9865	0.715061	DLG1, CHRNA3, TRAF5, MCOLN1, RFFL, SORBS1, ITPR3, BIRC2, CAPRIN2, ITGA4, PTK2B, TRAF3, IL13RA1, ACVR1B, PLXNC1, TLR4, GABBR2, ITGA11, NTRK3, ABCG8, VLDLR, GRIK4, DLG2, NR3C2, GRID2, PTPRN2, GRIA1, SHANK2, GRIK2, LRP1B, CHRNA5, GPR37, TRAF6, CHRNA7, ERBB4, GABRG3, SACM1L, PLXNA4, TRIL, GRIN2B, PKD1L3
835	GO:0030140	trans-Golgi network transport vesicle	GOCC	24	-0.0119468	0.928444	0.773494	0.914492	down	26119, 51324, 51552, 5874, 6272, 83988	0.888509	RAB27B, SPG21, NCALD, RAB14, SORT1, LDLRAP1
843	GO:0097346	INO80-type complex	GOCC	20	-0.0121008	0.927556	0.790205	0.92149	down	79913, 93973	0.89847	ACTR5, ACTR8
771	GO:0045111	intermediate filament cytoskeleton	GOCC	77	-0.0122039	0.926962	0.599536	0.797829	down	10694, 129401, 1497, 22941, 23650, 26119, 353238, 3728, 3884, 4741, 4744, 4747, 51517, 54464, 54828, 55329, 55968, 5716, 6595, 81565, 84260, 85302, 9118, 9228	0.771607	CTNS, SMARCA2, NSFL1C, NEFH, PSMD10, NEFM, XRN1, KRT33B, TRIM29, MNS1, TCHP, BCAS3, INA, CCT8, LDLRAP1, SHANK2, NUP35, NDEL1, JUP, FBF1, DLGAP2, NCKIPSD, PADI6, NEFL
776	GO:0031985	Golgi cisterna	GOCC	67	-0.0123271	0.926253	0.620806	0.816402	down	10959, 11113, 23256, 2527, 2530, 25843, 2800, 2801, 283987, 55204, 55512, 55790, 6272, 64083, 80146, 81555, 8853, 9334, 9950	0.787536	FUT8, GOLGA5, TMED2, SCFD1, SMPD3, GOLPH3, MOB4, UXS1, CIT, FUT5, SORT1, GOLGA1, GOLPH3L, YIPF5, CSGALNACT1, ASAP2, B4GALT5, GOLGA2, HID1
839	GO:0000421	autophagosome membrane	GOCC	20	-0.0124222	0.925705	0.784964	0.920586	down	11345, 157753, 22863, 51100	0.898258	GABARAPL2, SH3GLB1, ATG14, TMEM74
573	GO:0005887	integral component of plasma membrane	GOCC	546	-0.0124692	0.925435	0.162149	0.356091	down	1002, 10071, 10098, 10154, 10560, 10580, 10630, 109, 11136, 1136, 1138, 1139, 114134, 115, 116369, 1183, 1232, 1240, 129303, 1436, 1438, 166929, 1739, 1740, 1804, 182, 1826, 1944, 201780, 2030, 2046, 2185, 22801, 22908, 22941, 23385, 23428, 23555, 23630, 23657, 23705, 256227, 25780, 25800, 26047, 27032, 27075, 2742, 28231, 28232, 28234, 2825, 284129, 2861, 286133, 2890, 2895, 2898, 2900, 2904, 29…	0.325765	SLC25A5, ABCB4, ATP2C1, SLC7A9, NRXN3, SLC4A7, MSR1, RTN4R, ATP2C2, EPHA8, CLCN4, DLG1, BCAP29, CHRNA3, PSEN1, TRAF5, CD82, ICAM1, MCOLN1, SLC7A8, SORBS1, ITPR3, TSPAN15, SLCO4A1, JAG1, GLRA2, PHEX, SLC1A5, STEAP1B, TSPAN13, KCNT1, MPP2, BIRC2, TRPV4, SLCO1B3, SLC26A8, SLC22A2, SLC29A1, HRH2, ADAM23, ITGA4, NCF2, SLC19A2, EPCAM, PTK2B, TM9SF2, GRPR, PODXL, DPP6, MPP1, TRAF3, IL13RA1, CD36, CAPRIN…
565	GO:0031226	intrinsic component of plasma membrane	GOCC	572	-0.0127378	0.923892	0.144638	0.326164	down	1002, 10071, 10098, 10154, 10560, 10580, 10630, 109, 11136, 1136, 1138, 1139, 114134, 115, 116369, 1183, 1232, 1240, 129303, 1436, 1438, 153090, 166929, 1739, 1740, 1804, 182, 1826, 1944, 201780, 2030, 2046, 2185, 22801, 22821, 22908, 22941, 23385, 23428, 23555, 23630, 23657, 23705, 256227, 25780, 25800, 26047, 27032, 27075, 2742, 28231, 28232, 28234, 2825, 284129, 2861, 286133, 2890, 2895, 2898,…	0.300091	SLC25A5, ABCB4, ADIPOR2, ATP2C1, SLC7A9, NRXN3, SLC4A7, MSR1, RTN4R, ATP2C2, EPHA8, CLCN4, DLG1, BCAP29, CHRNA3, PSEN1, TRAF5, CD59, CD82, ICAM1, MCOLN1, SLC7A8, SORBS1, ITPR3, TSPAN15, SLCO4A1, JAG1, GLRA2, PHEX, SLC1A5, STEAP1B, TSPAN13, KCNT1, MPP2, BIRC2, TRPV4, SLCO1B3, SLC26A8, SLC22A2, SLC29A1, HRH2, ADAM23, ITGA4, NCF2, SLC19A2, EPCAM, PTK2B, TM9SF2, GRPR, PODXL, DPP6, MPP1, TRAF3, IL13RA…
793	GO:0005778	peroxisomal membrane	GOCC	43	-0.0130553	0.922071	0.675004	0.85497	down	11001, 2181, 3295, 375, 4257, 5193, 55825, 5825, 5826, 5828, 7265, 84896	0.816853	MGST1, PEX12, TTC1, PECR, ABCD3, ABCD4, ACSL3, HSD17B4, ATAD1, SLC27A2, ARF1, PEX2
797	GO:0031903	microbody membrane	GOCC	43	-0.0130553	0.922071	0.675004	0.85497	down	11001, 2181, 3295, 375, 4257, 5193, 55825, 5825, 5826, 5828, 7265, 84896	0.816853	MGST1, PEX12, TTC1, PECR, ABCD3, ABCD4, ACSL3, HSD17B4, ATAD1, SLC27A2, ARF1, PEX2
568	GO:0098590	plasma membrane region	GOCC	460	-0.0139643	0.916876	0.150876	0.337661	down	1012, 1015, 1020, 10207, 10227, 10243, 10257, 10630, 11136, 11141, 11252, 1136, 1138, 1139, 114569, 1495, 1496, 1499, 1739, 1740, 1756, 182, 2030, 2054, 2066, 222962, 22866, 22920, 22941, 23043, 23189, 23426, 23428, 23586, 23705, 2567, 2568, 25800, 26047, 26119, 27020, 27241, 27347, 2742, 28234, 2890, 2895, 2898, 2900, 2904, 2978, 3326, 3705, 3728, 375, 3756, 382, 3991, 4072, 440279, 4646, 4651, …	0.310133	ABCB4, CDKL5, SLC7A9, LRRC7, SLC4A7, RAB27B, USH2A, CTNNA1, GUCA1A, VAMP3, CTNNA2, RAB27A, CAMK2A, PICALM, DLG1, KIFAP3, STXBP2, CDH17, LIPE, CHRNA3, CADPS2, MTMR2, TESC, EXOC1, SLC7A8, EZR, GABRP, HSP90AB1, MAPK1, PACSIN2, ITPK1, JAG1, GLRA2, NDRG4, DNAJA3, HOMER2, KANK1, DDX58, PLEKHA1, PRKAR1A, MFSD10, TRPV4, STX2, SLCO1B3, SLC29A1, PDE4D, PRKAR2A, EPB41L5, EPCAM, KIF18A, BBS9, SEPTIN7, ABCC4,…
770	GO:1902554	serine/threonine protein kinase complex	GOCC	60	-0.0142251	0.915392	0.590927	0.793677	down	1017, 1022, 1025, 10935, 1163, 2071, 22938, 2965, 51719, 5573, 5576, 83667, 894, 902, 91, 9779, 9821	0.768754	RB1CC1, SNW1, PRKAR1A, GTF2H1, PRKAR2A, CCND2, CDK2, SESN2, TBC1D5, CDK7, CCNH, ACVR1B, CAB39, CDK9, ERCC3, PRDX3, CKS1B
828	GO:0000159	protein phosphatase type 2A complex	GOCC	20	-0.0143253	0.914822	0.754309	0.903557	down	29966, 5515, 5520, 5521, 5525	0.876736	PPP2R5A, PPP2CA, PPP2R2B, STRN3, PPP2R2A
660	GO:0030135	coated vesicle	GOCC	173	-0.015089	0.91049	0.336508	0.574568	down	10228, 10483, 10802, 10959, 1315, 143187, 161, 163, 164, 201294, 2209, 22820, 22905, 22937, 23245, 2571, 25977, 26119, 26958, 2801, 2890, 375, 4643, 4646, 4952, 51124, 51324, 51429, 51552, 5244, 55690, 55788, 57030, 57410, 57617, 5873, 5874, 59349, 6272, 6396, 6456, 65082, 6721, 7039, 79958, 8120, 81555, 8301, 83988, 8546, 8650, 8724, 9276, 9341, 9522, 9554, 9570, 9632, 966, 9779, 9892	0.534187	ABCB4, AP2B1, RAB27B, VAMP3, SNAP91, RAB27A, EPN2, PICALM, CD59, SCAMP1, TMED2, NECAP1, SPG21, UNC13D, SEC23B, AP3B2, VPS18, NCALD, SLC17A7, SH3GL2, GOSR2, SNX3, SEC24A, SCAP, KLHL12, RAB14, OCRL, GAD1, COPB1, SNX9, TBC1D5, AP3B1, NUMB, IER3IP1, SORT1, STX6, VPS33A, SCYL1, ARF1, YIPF5, ASTN2, FCGR1A, VTI1A, GRIA1, SEC13, MYO1E, LDLRAP1, COPG2, TGFA, AP1G1, GOLGA2, LMBRD1, PACS1, SEC24C, COPG1, AP…
736	GO:0098802	plasma membrane receptor complex	GOCC	73	-0.0153662	0.908923	0.523348	0.749964	down	10580, 1136, 1138, 1139, 1739, 1740, 2185, 22801, 22908, 22941, 2890, 2895, 2898, 2900, 2904, 329, 3597, 3676, 7187, 7188, 7189, 91, 9568	0.715061	DLG1, CHRNA3, TRAF5, SORBS1, BIRC2, ITGA4, PTK2B, TRAF3, IL13RA1, ACVR1B, GABBR2, ITGA11, GRIK4, DLG2, GRID2, GRIA1, SHANK2, GRIK2, CHRNA5, TRAF6, CHRNA7, SACM1L, GRIN2B
805	GO:0005782	peroxisomal matrix	GOCC	28	-0.015689	0.907102	0.68623	0.85556	down	3295, 3416, 3417, 5825	0.816853	ABCD3, IDE, HSD17B4, IDH1
806	GO:0031907	microbody lumen	GOCC	28	-0.015689	0.907102	0.68623	0.85556	down	3295, 3416, 3417, 5825	0.816853	ABCD3, IDE, HSD17B4, IDH1
735	GO:0070160	occluding junction	GOCC	70	-0.0157049	0.907012	0.523408	0.749964	down	10207, 1499, 154796, 1739, 1894, 23586, 4072, 51208, 55114, 55691, 64398, 7408, 79778, 83700, 84612, 9071, 9223	0.715061	CLDN18, MPP5, DLG1, DDX58, ECT2, EPCAM, PARD6B, VASP, AMOT, PATJ, CLDN10, ARHGAP17, MAGI1, FRMD4A, MICALL2, JAM3, CTNNB1
753	GO:0032588	trans-Golgi network membrane	GOCC	56	-0.0163892	0.903163	0.55192	0.761556	down	10066, 10228, 10466, 10717, 143187, 164, 22796, 27236, 400, 55016, 55204, 57511, 5870, 9341	0.734466	VAMP3, ARL1, COG6, AP4B1, COG2, STX6, SCAMP2, GOLPH3L, MARCH1, VTI1A, ARFIP1, COG5, AP1G1, RAB6A
726	GO:0005923	bicellular tight junction	GOCC	68	-0.0166829	0.901516	0.505143	0.738494	down	10207, 1499, 154796, 1739, 1894, 23586, 4072, 51208, 55114, 55691, 64398, 7408, 79778, 83700, 84612, 9071, 9223	0.703083	CLDN18, MPP5, DLG1, DDX58, ECT2, EPCAM, PARD6B, VASP, AMOT, PATJ, CLDN10, ARHGAP17, MAGI1, FRMD4A, MICALL2, JAM3, CTNNB1
789	GO:0008180	COP9 signalosome	GOCC	28	-0.0169421	0.900065	0.6637	0.853948	down	10920, 154796, 2037, 3326, 51138, 51517, 7111, 8533	0.816853	EPB41L2, HSP90AB1, AMOT, TMOD1, COPS4, COPS3, COPS8, NCKIPSD
487	GO:0044463	cell projection part	GOCC	574	-0.01717	0.898791	0.0516271	0.157697	down	100, 10160, 1020, 10227, 10228, 10300, 10458, 10630, 10947, 11136, 11252, 1139, 121441, 124602, 127933, 128344, 140735, 143187, 1499, 153090, 154313, 158297, 1656, 1739, 1740, 1756, 1826, 2185, 22863, 22920, 22941, 22974, 23002, 23059, 23064, 23189, 23586, 23613, 24137, 25800, 25843, 25861, 25930, 26031, 26047, 26052, 26230, 267, 26985, 27124, 27241, 2890, 2895, 2898, 2932, 2978, 3091, 3326, 3756…	0.145079	PAFAH1B1, CDKL5, SLC7A9, IFT88, RTN4R, SPATA7, USH2A, OFD1, GUCA1A, ATG5, PFN2, AP3M2, OSBPL3, NSF, DLG1, KIFAP3, PTPN23, CTTNBP2, SPAG6, PIK3C3, TULP3, KCNN2, PSEN1, MOK, GSK3B, KIF3C, MTMR2, AURKA, TPX2, TESC, KIF4A, EZR, WHRN, HSP90AB1, MAPK1, PACSIN2, DAAM1, HIF1A, ZMYND8, EEA1, NDRG4, CLUAP1, RNF40, AP3B2, HOMER2, CALB1, KANK1, DDX58, SETX, PLEKHA1, PRKAR1A, MFSD10, DDX6, TRPV4, PRKAR2A, FXR…
704	GO:0031901	early endosome membrane	GOCC	85	-0.0171704	0.898789	0.444045	0.682834	down	1183, 2046, 2209, 26056, 26060, 27131, 3756, 4952, 51552, 55016, 55198, 55920, 56674, 58533, 5869, 5878, 5879, 6455, 6643, 79666, 81609, 81615, 8411, 8723, 8724, 8898, 93380, 9372, 9896	0.646414	EPHA8, CLCN4, MTMR2, SNX5, EEA1, RAB5C, RAB5B, SNX3, FIG4, SNX4, RAB14, OCRL, SNX6, RAB11FIP5, APPL2, RAC1, SH3GL1, SNX27, KCNH1, MARCH1, FCGR1A, TMEM163, ZFYVE9, APPL1, MMGT1, TMEM9B, PLEKHF2, RCC2, SNX2
688	GO:0005795	Golgi stack	GOCC	92	-0.0177174	0.895739	0.412092	0.653127	down	10040, 10959, 11113, 22796, 23256, 23268, 2527, 2530, 25843, 2800, 2801, 283987, 4905, 4952, 51125, 51552, 55204, 55512, 55790, 55968, 5874, 6272, 64083, 7443, 80146, 81555, 8729, 8853, 9334, 9950	0.617937	FUT8, RAB27B, GOLGA5, NSF, TMED2, NSFL1C, SCFD1, VRK1, SMPD3, DNMBP, GBF1, GOLPH3, MOB4, UXS1, RAB14, OCRL, CIT, FUT5, SORT1, COG2, GOLGA1, TOM1L1, GOLPH3L, YIPF5, CSGALNACT1, GOLGA7, ASAP2, B4GALT5, GOLGA2, HID1
716	GO:0043197	dendritic spine	GOCC	69	-0.0178373	0.895071	0.474237	0.709771	down	10160, 10458, 22941, 23613, 25843, 26052, 2890, 2895, 3781, 5501, 5728, 57451, 6546, 7074, 8087, 83992, 8898, 9572	0.677046	CTTNBP2, KCNN2, MTMR2, ZMYND8, FXR1, MOB4, NR1D1, TENM2, GRID2, FARP1, GRIA1, TIAM1, SHANK2, PTEN, BAIAP2, SLC8A1, PPP1CC, DNM3
744	GO:0008023	transcription elongation factor complex	GOCC	45	-0.0183159	0.892413	0.552969	0.761556	down	1025, 123169, 22938, 26747, 4299, 5828, 7469, 79577, 8458	0.734466	NUFIP1, SNW1, TTF2, CDC73, CDK9, PEX2, LEO1, AFF1, NELFA
781	GO:0030990	intraciliary transport particle	GOCC	27	-0.0186729	0.890435	0.639364	0.834277	down	22920, 23059, 286827, 51626, 7289, 8100	0.804186	IFT88, KIFAP3, TULP3, CLUAP1, DYNC2LI1, TRIM59
795	GO:0030137	COPI-coated vesicle	GOCC	20	-0.0189527	0.888889	0.682471	0.85497	down	10959, 1315, 22820, 26958, 375, 55690, 57410, 8120, 9276	0.816853	TMED2, AP3B2, COPB1, SCYL1, ARF1, COPG2, PACS1, COPG1, COPB2
641	GO:0072372	primary cilium	GOCC	125	-0.0191108	0.888016	0.304811	0.548013	down	111, 140735, 158297, 22920, 22941, 23059, 23288, 25924, 27241, 2767, 2978, 3797, 3842, 4952, 5048, 51473, 51626, 55812, 585, 5873, 6103, 6903, 7289, 7399, 79583, 79600, 79659, 8100, 8701, 9657, 989	0.50909	PAFAH1B1, IFT88, SPATA7, USH2A, GUCA1A, RAB27A, KIFAP3, TULP3, TNPO1, KIF3C, GNA11, CLUAP1, DNAH11, IQCE, OCRL, BBS9, SEPTIN7, TBCC, DYNC2LI1, BBS4, DCDC2, SAXO1, RPGR, SHANK2, MYRIP, ADCY5, IQCB1, DYNC2H1, TCTN1, TMEM231, DYNLL2
700	GO:0044309	neuron spine	GOCC	71	-0.0192619	0.887182	0.434777	0.674757	down	10160, 10458, 22941, 23613, 25843, 26052, 2890, 2895, 3781, 5501, 5728, 57451, 6546, 7074, 8087, 83992, 8411, 8898, 9572	0.641332	CTTNBP2, KCNN2, MTMR2, ZMYND8, EEA1, FXR1, MOB4, NR1D1, TENM2, GRID2, FARP1, GRIA1, TIAM1, SHANK2, PTEN, BAIAP2, SLC8A1, PPP1CC, DNM3
707	GO:0070603	SWI/SNF superfamily-type complex	GOCC	64	-0.0193217	0.886852	0.456898	0.697808	down	11177, 138151, 1457, 26060, 29117, 54815, 55198, 57459, 5928, 5931, 6595, 6602, 79913, 93973	0.66295	SMARCD1, SMARCA2, CSNK2A1, ACTR5, RBBP7, ACTR8, APPL2, GATAD2B, NACC2, APPL1, RBBP4, BRD7, GATAD2A, BAZ1A
683	GO:0090575	RNA polymerase II transcription factor complex	GOCC	84	-0.0193334	0.886788	0.394133	0.636677	down	1022, 11036, 1499, 1869, 2071, 27097, 2958, 2965, 3091, 4087, 430, 4802, 51176, 51616, 51741, 6774, 6875, 6877, 6880, 6908, 8464, 902, 9519	0.603431	TBPL1, NFYC, HIF1A, E2F1, GTF2H1, TBP, CDK7, CCNH, TAF5L, LEF1, GTF2A2, TAF4B, TAF5, ERCC3, CTNNB1, STAT3, SMAD2, ASCL2, WWOX, TAF9B, SUPT3H, GTF2A1L, TAF9
585	GO:0061695	transferase complex, transferring phosphorus-containing groups	GOCC	203	-0.0195951	0.885347	0.18191	0.383209	down	1017, 1022, 1025, 10580, 10621, 10622, 10891, 10935, 11036, 11128, 1163, 123169, 167153, 1763, 2071, 22863, 22938, 23248, 25896, 26512, 27097, 2958, 2965, 4172, 4646, 51422, 51616, 51719, 5289, 5293, 5295, 54107, 5422, 5440, 5563, 5564, 55656, 5571, 5573, 55756, 5576, 5631, 5828, 6875, 6877, 6880, 6908, 79577, 81488, 83667, 8464, 8678, 894, 902, 91, 9519, 9779, 9821	0.354246	RB1CC1, TBPL1, PIK3C3, SORBS1, SNW1, POLA1, INTS6, INTS9, PRKAG2, PRKAR1A, PPARGC1A, GTF2H1, PRKAB1, MCM3, TBP, POLR3G, PRKAR2A, CCND2, CDK2, BECN1, ATG14, SESN2, TBC1D5, POLR3F, CDK7, CDC73, CCNH, ACVR1B, TAF5L, CAB39, CDK9, DNA2, GTF2A2, TAF4B, INTS7, PIK3R1, PRPS1, POLR2K, POLE3, POLR3A, TAF5, PRKAA2, RPRD2, ERCC3, TENT2, PEX2, INTS8, PRDX3, LEO1, PIK3CD, CKS1B, PRKAG1, TAF9B, SUPT3H, MYO6, GT…
609	GO:0016607	nuclear speck	GOCC	170	-0.0196248	0.885183	0.220596	0.433451	down	10569, 10783, 10921, 10946, 11273, 11325, 11338, 170261, 2034, 219988, 23236, 24144, 24148, 26097, 26121, 3091, 51322, 51340, 51729, 54033, 54815, 54890, 5501, 55109, 56478, 57459, 5936, 64318, 64326, 6729, 79677, 79872, 79882, 80196, 83932, 84321, 8446, 8554, 8559, 9063, 9129, 9343, 9733	0.403064	SPRTN, PIAS1, THOC3, U2AF2, SART3, PIAS2, WBP11, ALKBH5, WAC, TFIP11, HIF1A, ZC3H14, SRP54, PRPF6, CRNKL1, PRPF31, CBLL1, EFTUD2, EPAS1, PRPF3, NEK6, COP1, GATAD2B, DUSP11, CHTOP, SMC6, AGGF1, SLU7, PRPF18, PATL1, GATAD2A, ATXN2L, RNF34, NOC3L, RBM4, ZCCHC12, PLCB1, SF3A3, EIF4ENIF1, RBM11, PPP1CC, DDX42, RNPS1
777	GO:0044665	MLL1/2 complex	GOCC	27	-0.0198308	0.884051	0.619715	0.816402	down	11091, 26121, 54881, 5929, 6045, 6880	0.787536	PRPF31, RBBP5, RNF2, TEX10, WDR5, TAF9
778	GO:0071339	MLL1 complex	GOCC	27	-0.0198308	0.884051	0.619715	0.816402	down	11091, 26121, 54881, 5929, 6045, 6880	0.787536	PRPF31, RBBP5, RNF2, TEX10, WDR5, TAF9
701	GO:0000932	cytoplasmic mRNA processing body	GOCC	64	-0.0201762	0.882155	0.438174	0.676904	down	149041, 1656, 167227, 197135, 1977, 219988, 23019, 23034, 23644, 26065, 29883, 4076, 4848, 4849, 51441, 55095, 56478, 64506, 80153, 84962, 8878	0.642077	SAMD4A, EDC4, CNOT3, DDX6, CNOT2, CNOT1, AJUBA, CAPRIN1, RC3H1, EIF4E, SQSTM1, PATL1, DCP2, SAMD4B, EDC3, EIF4ENIF1, YTHDF2, CNOT7, CPEB1, PATL2, LSM14A
690	GO:0035097	histone methyltransferase complex	GOCC	68	-0.0207709	0.878901	0.411415	0.653127	down	11091, 2146, 23054, 26121, 3720, 4221, 4591, 54881, 5501, 5928, 5929, 5931, 6045, 6880, 9734	0.617937	JARID2, HDAC9, RBBP7, PRPF31, EZH2, TRIM37, RBBP5, RNF2, MEN1, TEX10, RBBP4, PPP1CC, WDR5, NCOA6, TAF9
786	GO:0090544	BAF-type complex	GOCC	21	-0.0208299	0.878579	0.646489	0.837073	down	29117, 6595, 6602	0.806296	SMARCD1, SMARCA2, BRD7
509	GO:0005635	nuclear envelope	GOCC	323	-0.020951	0.877918	0.0743011	0.206272	down	10017, 10269, 10424, 10526, 10762, 11260, 113878, 129401, 142, 1434, 199953, 204219, 221264, 22926, 23039, 23108, 23133, 23236, 23306, 23534, 23560, 23633, 23636, 253782, 26031, 26049, 2643, 2733, 27346, 310, 3710, 3756, 3838, 3839, 3842, 3843, 402569, 4085, 4646, 4745, 4864, 4927, 5048, 51514, 53371, 5422, 54881, 54956, 54980, 55120, 55329, 55379, 55706, 55746, 55787, 5663, 5664, 57122, 5880, 59…	0.190332	MAD1L1, PAFAH1B1, RB1CC1, KPNA6, NDC1, TNPO3, IPO5, NUP133, OSBPL3, PSEN1, TNPO1, ZMPSTE24, SEH1L, TXLNG, GMCL1, BRAP, DTX2, NUP50, ITPR3, RAE1, POLA1, KPNA3, NUP93, UBE2I, BNIP3L, GTPBP4, NUP88, LRRC59, TMEM97, NUP107, BNIP1, CEP70, FANCL, C2orf42, IPO13, ATF6, CCND2, GTF3C3, GLE1, TMPO, CSE1L, NUP153, NUP85, NUP214, RNF6, RAC2, XPO7, GCH1, RAN, RAP1GAP2, IPO8, SORT1, BRIP1, TEX10, BCL2L10, ANXA…
739	GO:0097542	ciliary tip	GOCC	38	-0.0210079	0.877608	0.53425	0.760627	down	140735, 22920, 23059, 3797, 51626, 79659, 8100	0.725403	IFT88, KIFAP3, KIF3C, CLUAP1, DYNC2LI1, DYNC2H1, DYNLL2
403	GO:1902494	catalytic complex	GOCC	926	-0.0212375	0.876356	0.00290225	0.0143405	down	10054, 10055, 1017, 10197, 1022, 10238, 1025, 1027, 10425, 10580, 10621, 10622, 10891, 10935, 10939, 10943, 11036, 11060, 11065, 11091, 11128, 11143, 11146, 114818, 114907, 1163, 117143, 121551, 123169, 126433, 138151, 140735, 143384, 1457, 1639, 1642, 167153, 1763, 1911, 201625, 2071, 2146, 22863, 22938, 23032, 23054, 23194, 23248, 23276, 23314, 23510, 255488, 25793, 25827, 25853, 25879, 25896, …	0.013149	MSL3, JARID2, BRCA1, RNF14, RB1CC1, GCLM, TBPL1, CUL3, MAT2B, DCUN1D1, HDAC9, CUL1, RNF4, GNAI3, PPP2R5A, RAD18, UBE2D1, SDHA, KLHL20, USP33, UBE2A, PIK3C3, DNAJA1, GMCL1, TRMT6, BRAP, TOX4, CDC23, SORBS1, FBXO7, SNW1, ASB2, PSMC1, TRPC4AP, CSNK2A1, ACTR5, USP14, PSMD10, POLA1, RBBP7, EEA1, JADE3, SUPT20H, INTS6, UBE2I, RNF40, INTS9, PIAS4, PRPF31, DNAH11, CBLL1, OGDH, EZH2, PRKAG2, CUL2, TRIM37,…
539	GO:0030424	axon	GOCC	240	-0.0217274	0.873692	0.10992	0.270572	down	1020, 10228, 10300, 10947, 11141, 1139, 115, 127933, 1496, 153090, 1630, 1739, 1740, 1826, 2185, 22974, 23064, 24137, 25983, 26047, 26052, 26119, 2617, 26985, 27252, 2890, 2898, 3091, 3756, 3831, 4741, 4744, 4747, 5048, 5217, 5594, 5663, 57030, 57463, 57698, 5799, 6049, 65078, 6772, 6790, 6809, 7074, 7345, 793, 8087, 8120, 81565, 8411, 8546, 8766, 8826, 8871, 8898, 9001, 9585, 9810	0.246036	PAFAH1B1, RTN4R, CTNNA2, PFN2, AP3M2, DLG1, KLHL20, SYNJ2, PSEN1, MTMR2, AURKA, TPX2, KIF4A, MAPK1, NEFH, HIF1A, EEA1, RNF40, AP3B2, RAB11A, CALB1, NEFM, SLC17A7, GARS, SETX, FXR1, STAT1, PTK2B, KLC1, RNF6, NGDN, AP3B1, STX6, DAB2IP, KIF20B, IQGAP1, KATNB1, KCNH1, DLG2, UHMK1, UCHL1, PTPRN2, GRIA1, TIAM1, LDLRAP1, ADCY9, GRIK2, CDK5, NDEL1, STX3, IL1RAPL1, DSCAM, HAP1, CNTNAP2, CHRNA7, AMIGO1, AP…
766	GO:0032391	photoreceptor connecting cilium	GOCC	25	-0.0223816	0.870147	0.592149	0.793677	down	22920, 55812, 585, 6903, 7399, 9657	0.768754	SPATA7, USH2A, KIFAP3, TBCC, BBS4, IQCB1
544	GO:0044441	ciliary part	GOCC	213	-0.0229475	0.867092	0.112249	0.272315	down	121441, 124602, 128344, 140735, 154313, 158297, 1656, 22863, 22920, 22941, 23002, 23059, 25930, 27241, 2978, 3797, 4957, 51473, 51626, 5289, 54084, 55329, 55567, 5573, 5576, 55812, 55835, 5663, 585, 5891, 6103, 7289, 7399, 7430, 79583, 79600, 79659, 8100, 84260, 8481, 85302, 8632, 8878, 9474, 9576, 989	0.246725	IFT88, SPATA7, USH2A, OFD1, GUCA1A, ATG5, KIFAP3, PTPN23, SPAG6, PIK3C3, TULP3, PSEN1, MOK, KIF3C, EZR, DAAM1, CLUAP1, PRKAR1A, DDX6, PRKAR2A, BBS9, SEPTIN7, ATG14, ODF2, DYNC2LI1, MNS1, NEDD1, TCHP, BBS4, DCDC2, CENPJ, SAXO1, RPGR, DNAH3, SQSTM1, SHANK2, PIFO, TSPEAR, DYNC2H1, DNAH17, FBF1, KIF19, TCTN1, TMEM231, DYNLL2, CFAP206
475	GO:0000785	chromatin	GOCC	341	-0.0239885	0.861501	0.0372012	0.120189	down	10036, 10111, 1058, 10622, 10891, 10919, 10951, 1111, 11168, 115426, 116138, 132243, 138151, 1457, 146956, 1499, 157570, 1656, 1663, 1786, 1788, 1869, 2146, 222229, 22938, 23028, 23063, 23236, 23244, 2551, 25842, 25942, 2625, 26747, 29128, 3014, 3151, 3183, 3659, 3835, 4084, 4087, 4171, 4221, 4772, 4999, 5074, 5347, 5422, 5469, 54828, 54962, 55010, 55723, 55818, 56254, 57167, 57332, 57459, 57597,…	0.110116	KDM1A, BAZ1B, DDX11, RAD51, MXD1, WAPL, MCM2, TP63, TIPIN, TOP2B, UBE2A, KIF22, SMARCA2, TCF7, NUFIP1, HNRNPC, TOX4, SNW1, SALL4, CSNK2A1, E2F1, ACTR5, POLA1, RNF40, ASF1B, EZH2, GATA3, SMC3, CBX1, PPARGC1A, DDX6, TIMELESS, SUDS3, ASF1A, TBP, POLR3G, RAD50, ACTR8, CENPA, STAT1, KDM3A, ORC2, RPA2, CCND2, DNMT3A, TMPO, RNF2, PDS5A, NCOA3, KLHDC3, IRF1, MED1, NR1D1, MBD4, DNMT1, NFATC1, RAN, DPF2, M…
767	GO:0035145	exon-exon junction complex	GOCC	22	-0.0240783	0.86102	0.590054	0.793677	down	10921, 127933, 81550	0.768754	TDRD3, UHMK1, RNPS1
715	GO:0045171	intercellular bridge	GOCC	39	-0.0241469	0.860653	0.472303	0.708455	down	25942, 51567, 55143, 55165, 79650, 80263, 8317, 9212, 9493, 9657	0.67646	CDC7, USB1, TDP2, TRIM45, CDCA8, KIF23, CEP55, SIN3A, IQCB1, AURKB
621	GO:0032993	protein-DNA complex	GOCC	99	-0.0246296	0.858075	0.244531	0.464195	down	1058, 132243, 1499, 2138, 25913, 26277, 3014, 3087, 3728, 4172, 4802, 5111, 51176, 51659, 54107, 5422, 5469, 5558, 6117, 6118, 7013, 8318	0.434287	NFYC, TINF2, CDC45, POLA1, EYA1, MCM3, CENPA, RPA2, MED1, POT1, GINS2, RPA1, PCNA, LEF1, PRIM2, TERF1, POLE3, HHEX, CTNNB1, JUP, H1FOO, H2AFX
634	GO:0019897	extrinsic component of plasma membrane	GOCC	83	-0.0246331	0.858057	0.286178	0.52401	down	10160, 1495, 1499, 2185, 246, 2534, 27131, 2773, 29127, 3728, 5127, 51429, 54331, 54843, 5879, 6000, 640, 6768, 7074, 7525, 83850, 8411, 8650, 8826, 9093, 9267, 94120, 9630	0.48787	FYN, CTNNA1, GNAI3, SNX5, EEA1, CDK16, DNAJA3, CYTH1, PTK2B, SNX9, NUMB, RAC1, BLK, SYTL2, IQGAP1, ST14, FARP1, GNA14, TIAM1, ESYT3, RACGAP1, ALOX15, SYTL3, CTNNB1, JUP, YES1, RGS7, GNG2
611	GO:0044798	nuclear transcription factor complex	GOCC	105	-0.0248345	0.856983	0.227202	0.444844	down	1022, 11036, 1499, 1869, 2071, 27097, 2958, 2965, 2976, 3091, 4087, 430, 4773, 4802, 51176, 51616, 51741, 6617, 6665, 6774, 6875, 6877, 6880, 6908, 8464, 9015, 902, 9329, 9330, 9519	0.413433	SNAPC1, TBPL1, NFYC, HIF1A, NFATC2, E2F1, GTF2H1, TBP, GTF3C2, GTF3C3, GTF3C4, SOX15, CDK7, CCNH, TAF5L, LEF1, GTF2A2, TAF4B, TAF1A, TAF5, ERCC3, CTNNB1, STAT3, SMAD2, ASCL2, WWOX, TAF9B, SUPT3H, GTF2A1L, TAF9
762	GO:1990752	microtubule end	GOCC	22	-0.0250456	0.85586	0.575966	0.781917	down	10615, 10982, 11004, 22924, 23172, 259266, 57701	0.756594	ASPM, SPAG5, MAPRE3, KIF2C, ABRAXAS2, MAPRE2, NCKAP5L
580	GO:0016324	apical plasma membrane	GOCC	129	-0.0252523	0.854761	0.174346	0.37542	down	10207, 11136, 1139, 114569, 182, 2030, 222962, 22941, 23043, 27347, 3326, 3705, 4072, 481, 5144, 51458, 5244, 5420, 54716, 55763, 5664, 5728, 5873, 5874, 59341, 64241, 6518, 6809, 6813, 7399, 7430, 9341, 948, 9497, 989	0.347129	ABCB4, SLC7A9, SLC4A7, RAB27B, USH2A, VAMP3, RAB27A, STXBP2, EXOC1, EZR, HSP90AB1, ITPK1, JAG1, TRPV4, SLC29A1, PDE4D, EPCAM, SEPTIN7, PODXL, PATJ, CD36, RHCG, SLC2A5, ATP1B1, PSEN2, ABCG8, MAL2, TNIK, SHANK2, SLC6A20, SLC29A4, STX3, PTEN, CHRNA7, STK39
722	GO:0010494	cytoplasmic stress granule	GOCC	33	-0.0253342	0.854326	0.488822	0.721953	down	10146, 11273, 149041, 1653, 1656, 1977, 23185, 26065, 2886, 4076, 55239, 5936, 6311, 6780	0.686826	DDX1, OGFOD1, LARP4B, DDX6, STAU1, CAPRIN1, RC3H1, GRB7, G3BP1, EIF4E, ATXN2L, RBM4, ATXN2, LSM14A
752	GO:0031526	brush border membrane	GOCC	24	-0.0254231	0.853854	0.553543	0.761556	down	10227, 11136, 22941, 3326, 948	0.734466	SLC7A9, HSP90AB1, MFSD10, CD36, SHANK2
499	GO:0098791	Golgi subcompartment	GOCC	216	-0.0268829	0.846143	0.063177	0.182996	down	10040, 10066, 10228, 10396, 10466, 10717, 10959, 11113, 128344, 143187, 163, 164, 22796, 23163, 23256, 23268, 2527, 2530, 25843, 27032, 27236, 27252, 2800, 2801, 283987, 375, 400, 4905, 4952, 51125, 51429, 51552, 51760, 54103, 54715, 54874, 55016, 55204, 55512, 55627, 55790, 55968, 57511, 5870, 5874, 5879, 6272, 6311, 64083, 6845, 7443, 80146, 81555, 8440, 8678, 8729, 8766, 8853, 9334, 9341, 9522…	0.167968	AP2B1, ATP2C1, FUT8, RAB27B, VAMP3, GOLGA5, NCK2, NSF, KLHL20, RBFOX1, SCAMP1, TMED2, NSFL1C, SCFD1, VRK1, SMPD3, SYT17, RAB11A, DNMBP, GBF1, GOLPH3, MOB4, UXS1, RAB14, ARL1, OCRL, CIT, VAMP7, ATP8A1, GGA3, BECN1, SNX9, FUT5, COG6, SORT1, AP4B1, COG2, STX6, GCC2, RAC1, SMPD4, GOLGA1, FNBP1L, SCAMP2, TOM1L1, GOLPH3L, ARF1, MARCH1, YIPF5, CSGALNACT1, GOLGA7, VTI1A, ASAP2, B4GALT5, ARFIP1, COG5, AP1…
743	GO:0005838	proteasome regulatory particle	GOCC	21	-0.0272277	0.844332	0.554158	0.761556	down	5700, 5707, 5708, 5716, 5717, 5718, 9861	0.734466	PSMC1, PSMD10, PSMD11, PSMD6, PSMD1, PSMD2, PSMD12
491	GO:0005769	early endosome	GOCC	218	-0.027388	0.843491	0.0574954	0.172486	down	10228, 10612, 10935, 11252, 1183, 123606, 153020, 1730, 2046, 2209, 22906, 23245, 23295, 25930, 26047, 26056, 26060, 26119, 26750, 27074, 27131, 27342, 3756, 382, 3833, 4952, 51552, 54520, 55016, 55198, 55737, 55920, 5594, 5604, 56674, 57020, 57403, 57590, 57617, 5770, 58533, 5861, 5869, 5878, 5879, 6272, 6455, 6477, 65082, 6643, 7251, 7803, 79139, 79666, 81609, 81614, 81615, 8291, 84079, 8411, 8…	0.158559	RABEP1, VPS35, EPHA8, CLCN4, TSG101, PTPN23, LAMP3, WDFY1, MTMR2, SNX5, MAPK1, PACSIN2, TM9SF4, EEA1, MGRN1, USP10, VPS35L, VPS18, ANKRD27, RAB5C, TRIM3, RAB5B, PTP4A1, SNX3, FIG4, SNX4, RAB14, OCRL, VPS26A, RAB22A, CCDC93, SNX6, NUMB, SORT1, RAB11FIP5, DYSF, STX6, APPL2, RAC1, RPS6KC1, DERL1, RAB1A, RASGEF1B, VPS33A, NIPA2, SH3GL1, SNX27, KCNH1, MARCH1, DIAPH2, ASTN2, FCGR1A, RABGAP1L, TMEM163, …
486	GO:0031984	organelle subcompartment	GOCC	229	-0.0274157	0.843346	0.0514542	0.157697	down	10040, 10066, 10228, 10396, 10466, 10717, 10959, 11113, 128344, 143187, 163, 164, 22796, 22931, 23163, 23256, 23268, 2527, 2530, 25843, 27032, 27236, 27252, 2800, 2801, 283987, 375, 400, 4905, 4952, 51125, 51429, 51552, 51760, 54103, 54715, 54874, 54956, 55016, 55204, 55512, 55627, 55790, 55968, 57511, 5870, 5874, 5879, 6272, 6311, 64083, 6845, 7443, 80146, 81555, 8440, 8678, 8729, 8766, 8853, 93…	0.145079	AP2B1, ATP2C1, FUT8, RAB27B, VAMP3, GOLGA5, NCK2, NSF, KLHL20, RBFOX1, SCAMP1, TMED2, NSFL1C, SCFD1, RAB18, VRK1, SMPD3, SYT17, RAB11A, DNMBP, GBF1, GOLPH3, MOB4, UXS1, RAB14, ARL1, OCRL, CIT, VAMP7, ATP8A1, GGA3, BECN1, SNX9, FUT5, COG6, SORT1, AP4B1, COG2, STX6, GCC2, RAC1, SMPD4, GOLGA1, FNBP1L, PARP16, SCAMP2, TOM1L1, GOLPH3L, ARF1, MARCH1, YIPF5, CSGALNACT1, GOLGA7, VTI1A, ASAP2, B4GALT5, AR…
619	GO:0036064	ciliary basal body	GOCC	76	-0.0284376	0.838007	0.242004	0.46309	down	121441, 128344, 158297, 22920, 23002, 25930, 51626, 55812, 55835, 585, 6103, 7399, 7430, 8100, 8481	0.433266	IFT88, SPATA7, USH2A, OFD1, KIFAP3, PTPN23, EZR, DAAM1, DYNC2LI1, NEDD1, BBS4, CENPJ, SAXO1, RPGR, PIFO
604	GO:0043296	apical junction complex	GOCC	83	-0.0290389	0.834881	0.212514	0.423592	down	10207, 10580, 144100, 1495, 1499, 154796, 1739, 1894, 23586, 3728, 3801, 4072, 51208, 55114, 55691, 64398, 7408, 79778, 83700, 84612, 85302, 9071, 9223	0.394155	CTNNA1, CLDN18, MPP5, DLG1, SORBS1, DDX58, ECT2, EPCAM, PARD6B, VASP, AMOT, PATJ, CLDN10, ARHGAP17, KIFC3, MAGI1, FRMD4A, MICALL2, JAM3, PLEKHA7, CTNNB1, JUP, FBF1
606	GO:0017053	transcriptional repressor complex	GOCC	76	-0.0302128	0.828813	0.215291	0.426771	down	11218, 138151, 1457, 1488, 221895, 25942, 26060, 51132, 54815, 55122, 55198, 57459, 57597, 5928, 5931, 5932, 6497, 7529, 79718, 91750	0.396635	DDX20, CSNK2A1, RBBP8, RBBP7, RLIM, AKIRIN2, APPL2, GATAD2B, NACC2, JAZF1, APPL1, SKI, RBBP4, YWHAB, GATAD2A, SIN3A, CTBP2, TBL1XR1, LIN52, BAHCC1
698	GO:0001750	photoreceptor outer segment	GOCC	31	-0.0305063	0.827303	0.423523	0.660343	down	22941, 25924, 2767, 2978, 4952, 585, 5873, 6103, 9657	0.626814	GUCA1A, RAB27A, GNA11, OCRL, BBS4, RPGR, SHANK2, MYRIP, IQCB1
570	GO:0055037	recycling endosome	GOCC	96	-0.0308565	0.825504	0.155829	0.346665	down	10066, 11252, 117584, 164, 201294, 23043, 23080, 23426, 26056, 26119, 27229, 27342, 286410, 2890, 382, 51552, 55041, 55610, 5901, 79778, 8411, 84440, 8766, 9135, 9341, 9522, 9896	0.318353	VPS50, RABEP1, VAMP3, SCAMP1, RFFL, UNC13D, PACSIN2, ATP11C, EEA1, RAB11A, AVL9, FIG4, PLEKHB2, RAB14, RAB11FIP4, RAN, RAB11FIP5, TUBGCP4, SCAMP2, TNIK, RABGEF1, GRIA1, GRIP1, LDLRAP1, MICALL2, ARF6, AP1G1
721	GO:0032420	stereocilium	GOCC	23	-0.0309105	0.825227	0.485043	0.719002	down	25861, 4354, 54084, 7399, 9455, 9497, 9732	0.684682	SLC4A7, USH2A, WHRN, HOMER2, DOCK4, MPP1, TSPEAR
612	GO:0030175	filopodium	GOCC	64	-0.031981	0.819755	0.229902	0.447809	down	10160, 1020, 10458, 10630, 1756, 25983, 26031, 26230, 382, 4651, 5420, 55740, 57451, 5756, 57698, 59341, 65059, 7408, 7430, 998	0.416638	CDC42, OSBPL3, EZR, TRPV4, VASP, PODXL, NGDN, MYO10, TENM2, TIAM2, TWF1, FARP1, ENAH, PDPN, CDK5, ARF6, RAPH1, BAIAP2, SHTN1, DMD
429	GO:0016604	nuclear body	GOCC	300	-0.0320508	0.8194	0.010015	0.0415435	down	1017, 1025, 10569, 10783, 10891, 10921, 10946, 11051, 11052, 11218, 11273, 11325, 11338, 138151, 148523, 1613, 1653, 170261, 2034, 219988, 23236, 24144, 24148, 26097, 26121, 27252, 3091, 406, 4863, 51322, 51340, 51567, 51588, 51729, 54033, 54815, 54890, 5501, 55109, 55743, 5598, 56478, 5728, 57451, 57459, 5888, 5936, 6045, 6047, 6049, 6117, 6118, 6304, 641, 64318, 64326, 6497, 6606, 6729, 7181, 7…	0.0386664	SPRTN, PIAS1, RAD51, THOC3, U2AF2, RNF4, DDX20, CHFR, SART3, KLHL20, PIAS2, DDX1, WBP11, ALKBH5, WAC, TFIP11, HIF1A, ZC3H14, SRP54, PRPF6, CRNKL1, UBE2I, PIAS4, PRPF31, CBLL1, EFTUD2, PPARGC1A, CPSF6, TDP2, EPAS1, PRPF3, RPA2, NEK6, NR2C1, COIL, RNF2, CDK2, RNF6, RPA1, ARNTL, CDK9, TGS1, COP1, GATAD2B, DUSP11, TENM2, NACC2, NPAT, SKI, CIART, CHTOP, SQSTM1, SMC6, AGGF1, SLU7, TP53INP1, PRPF18, NOL…
702	GO:0032421	stereocilium bundle	GOCC	26	-0.0324299	0.817472	0.437241	0.676904	down	25861, 4354, 51473, 54084, 7399, 9455, 9497, 9732	0.642077	SLC4A7, USH2A, WHRN, HOMER2, DOCK4, MPP1, DCDC2, TSPEAR
653	GO:0030120	vesicle coat	GOCC	41	-0.0326153	0.81653	0.327011	0.567719	down	10483, 10802, 1315, 161, 163, 22820, 22905, 25977, 26119, 26958, 57410, 8301, 83988, 9276, 9632, 9779	0.527188	AP2B1, EPN2, PICALM, NECAP1, SEC23B, NCALD, SEC24A, COPB1, TBC1D5, SCYL1, LDLRAP1, COPG2, SEC24C, COPG1, AP2A2, COPB2
371	GO:0005815	microtubule organizing center	GOCC	541	-0.0328902	0.815137	0.000460663	0.00297659	down	10015, 1017, 10190, 10300, 10426, 10464, 10579, 10580, 10615, 10694, 10783, 10806, 10868, 11051, 11064, 11104, 1111, 11190, 116840, 118611, 121441, 123169, 128344, 134359, 137492, 140735, 144100, 1453, 1499, 152185, 158297, 1639, 1663, 219736, 219844, 222229, 22920, 22948, 23002, 23032, 23059, 23108, 2314, 23172, 23194, 25853, 25879, 25930, 25932, 26056, 26289, 26586, 27229, 27241, 2773, 284403, …	0.00249432	MAD1L1, PAFAH1B1, BRCA1, DDX11, IFT88, USP2, SPDL1, SPATA7, USH2A, OFD1, RAD51, SDCCAG8, GNAI3, CDC42, RAD18, WDR62, KIFAP3, PTPN23, SPAG5, USP33, PSEN1, TRAF5, GSK3B, PIBF1, AURKA, EZR, CDC45, SORBS1, MAPK1, ATP6V1D, DAAM1, CLUAP1, RAB11A, NCAPG, CAPRIN2, MDM1, NUP107, MCM3, PDE4D, SKP1, ACTR8, TBCCD1, CEP70, PRKAR2A, TXNDC9, ORC2, KLHL12, CDC20, NEK2, CNTRL, NEK6, MASTL, KIF18A, LRIF1, BBS9, CD…
666	GO:1902562	H4 histone acetyltransferase complex	GOCC	36	-0.0329428	0.81487	0.353689	0.595687	down	10943, 11091, 51562, 54107, 55689, 8089, 9898	0.55295	MSL3, YEATS4, UBAP2L, POLE3, MBIP, YEATS2, WDR5
530	GO:0000428	DNA-directed RNA polymerase complex	GOCC	111	-0.0333662	0.812729	0.100515	0.253931	down	1022, 10621, 10622, 10891, 11036, 11128, 123169, 2071, 23248, 25896, 26512, 27097, 2958, 2965, 4172, 4646, 51616, 5422, 5440, 55656, 55756, 5828, 6875, 6877, 6880, 6908, 79577, 81488, 8464, 902, 9519	0.232333	TBPL1, POLA1, INTS6, INTS9, PPARGC1A, GTF2H1, MCM3, TBP, POLR3G, POLR3F, CDK7, CDC73, CCNH, TAF5L, GTF2A2, TAF4B, INTS7, POLR2K, POLR3A, TAF5, RPRD2, ERCC3, PEX2, INTS8, LEO1, TAF9B, SUPT3H, MYO6, GTF2A1L, POLR2M, TAF9
532	GO:0055029	nuclear DNA-directed RNA polymerase complex	GOCC	111	-0.0333662	0.812729	0.100515	0.253931	down	1022, 10621, 10622, 10891, 11036, 11128, 123169, 2071, 23248, 25896, 26512, 27097, 2958, 2965, 4172, 4646, 51616, 5422, 5440, 55656, 55756, 5828, 6875, 6877, 6880, 6908, 79577, 81488, 8464, 902, 9519	0.232333	TBPL1, POLA1, INTS6, INTS9, PPARGC1A, GTF2H1, MCM3, TBP, POLR3G, POLR3F, CDK7, CDC73, CCNH, TAF5L, GTF2A2, TAF4B, INTS7, POLR2K, POLR3A, TAF5, RPRD2, ERCC3, PEX2, INTS8, LEO1, TAF9B, SUPT3H, MYO6, GTF2A1L, POLR2M, TAF9
496	GO:0005802	trans-Golgi network	GOCC	143	-0.0336928	0.811081	0.0603186	0.177005	down	10066, 10228, 10396, 10466, 10717, 128344, 143187, 163, 164, 22796, 23163, 27032, 27236, 27252, 2800, 375, 400, 4952, 51429, 51552, 51760, 54103, 54715, 54874, 55016, 55204, 55627, 57511, 5870, 5879, 6311, 64083, 6845, 8440, 8678, 8729, 8766, 9341, 9522, 9648	0.163302	AP2B1, ATP2C1, VAMP3, NCK2, KLHL20, RBFOX1, SCAMP1, SYT17, RAB11A, GBF1, GOLPH3, RAB14, ARL1, OCRL, VAMP7, ATP8A1, GGA3, BECN1, SNX9, COG6, AP4B1, COG2, STX6, GCC2, RAC1, SMPD4, GOLGA1, FNBP1L, SCAMP2, GOLPH3L, ARF1, MARCH1, VTI1A, ARFIP1, COG5, AP1G1, PIFO, RAB6A, GSAP, ATXN2
351	GO:0044451	nucleoplasm part	GOCC	630	-0.0338633	0.810222	0.000110008	0.00088006	down	1017, 1022, 1024, 1025, 10569, 10621, 10622, 10783, 10891, 10921, 10943, 10946, 11036, 11051, 11052, 11091, 11128, 11143, 11218, 11273, 11325, 11338, 116931, 117143, 123169, 138151, 1457, 148523, 1613, 1653, 170261, 2034, 2071, 2146, 219988, 22938, 23054, 23144, 23236, 23248, 23314, 24144, 24148, 25896, 25942, 26060, 26097, 26121, 26512, 26747, 27097, 27252, 2958, 2965, 29894, 3091, 3720, 406, 42…	0.000763177	MSL3, JARID2, SPRTN, ZC3H3, TBPL1, PIAS1, HDAC9, RAD51, THOC3, U2AF2, RNF4, DDX20, CPSF1, CHFR, SART3, KLHL20, PIAS2, DDX1, NUFIP1, WBP11, ALKBH5, CDC45, WAC, MED15, TFIP11, SNW1, HIF1A, ZC3H14, SRP54, PRPF6, CSNK2A1, CRNKL1, RBBP7, JADE3, SUPT20H, INTS6, UBE2I, INTS9, PIAS4, PRPF31, CBLL1, EZH2, TRIM37, EFTUD2, PPARGC1A, GTF2H1, CPSF6, SUDS3, TDP2, TBP, POLR3G, FANCL, USP34, EPAS1, TTF2, RBBP5, …
510	GO:1990351	transporter complex	GOCC	126	-0.0340597	0.809234	0.0745895	0.206272	down	1136, 1138, 1139, 1739, 1740, 1804, 2185, 221154, 22908, 22941, 23630, 2567, 2568, 25932, 26047, 26515, 2742, 2890, 2895, 2898, 2900, 2904, 342372, 3756, 3763, 3790, 481, 486, 5144, 5193, 55013, 55799, 56262, 57463, 57582, 5826, 64241, 775, 801, 80333, 805, 90550, 91404, 9254, 94015	0.190332	MCUB, CACNA2D2, DLG1, CHRNA3, GABRP, GLRA2, KCNT1, PEX12, PDE4D, ABCD4, PTK2B, DPP6, TIMM10B, LRRC8A, FXYD2, TTYH2, ATP1B1, KCNH1, ABCG8, CALM2, GRIK4, DLG2, CACNA1C, GRID2, GRIA1, MCU, CACNA2D3, KCNJ6, SHANK2, GRIK2, MICU2, CLIC4, CHRNA5, KCNS3, CNTNAP2, CHRNA7, KCNE5, AMIGO1, GABRG3, KCNIP4, SESTD1, CALM1, SACM1L, GRIN2B, PKD1L3
447	GO:0000790	nuclear chromatin	GOCC	224	-0.0340735	0.809164	0.0179344	0.0669549	down	10036, 10111, 1058, 10622, 10891, 10919, 10951, 115426, 116138, 138151, 1457, 146956, 1499, 157570, 1663, 1788, 1869, 2146, 23028, 23236, 2551, 25842, 25942, 2625, 26747, 29128, 3014, 3183, 3659, 4084, 4087, 4221, 4772, 5074, 54962, 55723, 57332, 57459, 5888, 5928, 5977, 6045, 6304, 64426, 6595, 6772, 6774, 6908, 6932, 7068, 7319, 79595, 79892, 79913, 8202, 8208, 83881, 84193, 8626, 8914, 93973, …	0.0617276	KDM1A, DDX11, RAD51, MXD1, TP63, TIPIN, UBE2A, SMARCA2, TCF7, NUFIP1, HNRNPC, CSNK2A1, E2F1, ACTR5, ASF1B, EZH2, GATA3, CBX1, PPARGC1A, TIMELESS, SUDS3, ASF1A, TBP, POLR3G, RAD50, ACTR8, CENPA, STAT1, DNMT3A, RNF2, NCOA3, KLHDC3, IRF1, NR1D1, NFATC1, DPF2, MEN1, SAP130, USP3, CBX8, GATAD2B, UHRF2, NACC2, THRB, GABPA, EME1, CHAF1B, RBBP4, CHAF1A, CTNNB1, STAT3, SIN3A, ESCO2, SMAD2, PAWR, SATB1, PL…
672	GO:0055038	recycling endosome membrane	GOCC	31	-0.0343122	0.807965	0.370834	0.617798	down	10066, 11252, 117584, 26056, 382, 55041, 84440, 8766, 9522	0.577721	SCAMP1, RFFL, PACSIN2, RAB11A, PLEKHB2, RAB11FIP4, RAB11FIP5, SCAMP2, ARF6
517	GO:0030880	RNA polymerase complex	GOCC	112	-0.034438	0.807333	0.0891453	0.239622	down	1022, 10621, 10622, 10891, 11036, 11128, 123169, 167153, 2071, 23248, 25896, 26512, 27097, 2958, 2965, 4172, 4646, 51616, 5422, 5440, 55656, 55756, 5828, 6875, 6877, 6880, 6908, 79577, 81488, 8464, 902, 9519	0.22112	TBPL1, POLA1, INTS6, INTS9, PPARGC1A, GTF2H1, MCM3, TBP, POLR3G, POLR3F, CDK7, CDC73, CCNH, TAF5L, GTF2A2, TAF4B, INTS7, POLR2K, POLR3A, TAF5, RPRD2, ERCC3, TENT2, PEX2, INTS8, LEO1, TAF9B, SUPT3H, MYO6, GTF2A1L, POLR2M, TAF9
592	GO:0034703	cation channel complex	GOCC	63	-0.0344992	0.807026	0.20048	0.41416	down	1740, 1804, 221154, 23630, 26047, 342372, 3756, 3763, 3790, 5144, 55013, 55799, 57463, 57582, 775, 801, 80333, 805, 90550, 91404, 9254	0.384513	MCUB, CACNA2D2, KCNT1, PDE4D, DPP6, KCNH1, CALM2, DLG2, CACNA1C, MCU, CACNA2D3, KCNJ6, MICU2, KCNS3, CNTNAP2, KCNE5, AMIGO1, KCNIP4, SESTD1, CALM1, PKD1L3
412	GO:0005929	cilium	GOCC	307	-0.0346119	0.806462	0.00510126	0.0236417	down	10694, 109, 11057, 111, 11190, 118611, 121441, 124602, 128344, 140735, 152006, 154313, 154865, 158297, 164781, 1656, 201625, 220136, 22863, 22920, 22941, 23002, 23059, 23288, 23639, 25924, 25930, 27241, 2767, 286827, 2978, 3091, 3797, 3842, 389799, 3948, 4952, 4957, 5048, 51382, 51473, 51571, 51626, 5289, 54084, 55329, 55567, 5573, 5576, 55812, 55835, 5663, 585, 5873, 5891, 59341, 6103, 6790, 690…	0.0221937	PAFAH1B1, IFT88, SPATA7, USH2A, OFD1, GUCA1A, ATG5, RAB27A, KIFAP3, PTPN23, SPAG6, PIK3C3, TULP3, PSEN1, MOK, TNPO1, KIF3C, AURKA, GNA11, EZR, ATP6V1D, DAAM1, HIF1A, CLUAP1, DNAH11, IQCE, PRKAR1A, DDX6, TRPV4, PRKAR2A, OCRL, BBS9, SEPTIN7, DAW1, TBCC, CEP250, ATG14, LRRC6, TTLL4, ODF2, RNF38, ADCY3, DYNC2LI1, MNS1, NEDD1, TCHP, BBS4, ABHD2, ROPN1L, DCDC2, SLC25A31, CENPJ, FAM49B, C10orf90, SAXO1,…
504	GO:0033267	axon part	GOCC	121	-0.0353192	0.802924	0.0704523	0.199763	down	10228, 10947, 1139, 153090, 1739, 1740, 22974, 24137, 26047, 26985, 2890, 2898, 3091, 3756, 4747, 5048, 5217, 57698, 5799, 65078, 6790, 6809, 7074, 7345, 793, 8120, 81565, 8411, 8546, 9001, 9810	0.185094	PAFAH1B1, RTN4R, PFN2, AP3M2, DLG1, AURKA, TPX2, KIF4A, HIF1A, EEA1, RNF40, AP3B2, CALB1, AP3B1, STX6, DAB2IP, KCNH1, DLG2, UCHL1, PTPRN2, GRIA1, TIAM1, GRIK2, NDEL1, STX3, HAP1, CNTNAP2, CHRNA7, AP3M1, SHTN1, NEFL
546	GO:0016591	DNA-directed RNA polymerase II, holoenzyme	GOCC	89	-0.0357401	0.800827	0.116028	0.279465	down	1022, 10891, 11036, 123169, 2071, 23248, 25896, 26512, 27097, 2958, 2965, 4646, 51616, 5440, 55656, 55756, 5828, 6875, 6877, 6880, 6908, 79577, 81488, 8464, 902, 9519	0.252531	TBPL1, INTS6, INTS9, PPARGC1A, GTF2H1, TBP, CDK7, CDC73, CCNH, TAF5L, GTF2A2, TAF4B, INTS7, POLR2K, TAF5, RPRD2, ERCC3, PEX2, INTS8, LEO1, TAF9B, SUPT3H, MYO6, GTF2A1L, POLR2M, TAF9
655	GO:0030672	synaptic vesicle membrane	GOCC	34	-0.035893	0.800066	0.328039	0.567719	down	10059, 127833, 3382, 57030, 5799, 6854, 81615, 8224, 9522, 9899	0.527188	ICA1, SCAMP1, DNM1L, SLC17A7, SYT2, TMEM163, PTPRN2, SYN2, SV2B, SYN3
659	GO:0099501	exocytic vesicle membrane	GOCC	34	-0.035893	0.800066	0.328039	0.567719	down	10059, 127833, 3382, 57030, 5799, 6854, 81615, 8224, 9522, 9899	0.527188	ICA1, SCAMP1, DNM1L, SLC17A7, SYT2, TMEM163, PTPRN2, SYN2, SV2B, SYN3
662	GO:0034704	calcium channel complex	GOCC	32	-0.0361425	0.798827	0.339437	0.577472	down	221154, 5144, 55013, 55799, 775, 801, 805, 90550, 91404, 9254	0.536334	MCUB, CACNA2D2, PDE4D, CALM2, CACNA1C, MCU, CACNA2D3, MICU2, SESTD1, CALM1
498	GO:1902495	transmembrane transporter complex	GOCC	120	-0.0366223	0.796448	0.0622215	0.181008	down	1136, 1138, 1139, 1739, 1740, 1804, 2185, 221154, 22908, 22941, 23630, 2567, 2568, 25932, 26047, 2742, 2890, 2895, 2898, 2900, 2904, 342372, 3756, 3763, 3790, 481, 486, 5144, 55013, 55799, 56262, 57463, 57582, 5826, 64241, 775, 801, 80333, 805, 90550, 91404, 9254, 94015	0.166424	MCUB, CACNA2D2, DLG1, CHRNA3, GABRP, GLRA2, KCNT1, PDE4D, ABCD4, PTK2B, DPP6, LRRC8A, FXYD2, TTYH2, ATP1B1, KCNH1, ABCG8, CALM2, GRIK4, DLG2, CACNA1C, GRID2, GRIA1, MCU, CACNA2D3, KCNJ6, SHANK2, GRIK2, MICU2, CLIC4, CHRNA5, KCNS3, CNTNAP2, CHRNA7, KCNE5, AMIGO1, GABRG3, KCNIP4, SESTD1, CALM1, SACM1L, GRIN2B, PKD1L3
373	GO:0005813	centrosome	GOCC	424	-0.0368594	0.795275	0.000516415	0.00324328	down	1017, 10190, 10300, 10426, 10464, 10580, 10615, 10694, 10806, 10868, 11051, 11064, 11104, 1111, 11190, 116840, 118611, 121441, 123169, 134359, 137492, 140735, 144100, 1453, 1499, 152185, 158297, 1639, 1663, 219736, 219844, 22920, 22948, 23032, 23059, 23108, 23172, 23194, 25853, 25879, 25932, 26586, 27229, 27241, 2773, 284403, 286827, 2932, 3397, 3801, 4172, 440145, 441054, 4750, 4751, 4957, 4999,…	0.00272962	MAD1L1, PAFAH1B1, DDX11, IFT88, USP2, OFD1, SDCCAG8, GNAI3, RAD18, WDR62, KIFAP3, SPAG5, USP33, PSEN1, TRAF5, GSK3B, PIBF1, AURKA, CDC45, SORBS1, ATP6V1D, CLUAP1, RAB11A, NCAPG, CAPRIN2, MDM1, NUP107, MCM3, PDE4D, SKP1, ACTR8, TBCCD1, CEP70, PRKAR2A, TXNDC9, ORC2, CDC20, NEK2, CNTRL, MASTL, BBS9, CDK2, ID1, CEP250, TUBGCP3, DLGAP5, AUNIP, CEP85, HAUS8, TOP2A, RAN, RAP1GAP2, PCNA, DCTN4, DPF2, CCN…
326	GO:0015630	microtubule cytoskeleton	GOCC	871	-0.0373903	0.792656	8.29308e-07	9.44568e-06	down	10015, 10059, 10112, 1017, 10190, 10300, 10426, 10460, 10464, 10576, 10579, 10580, 10615, 10694, 10783, 10806, 10808, 10868, 10951, 10982, 11004, 11051, 11064, 11083, 11104, 1111, 11190, 116840, 118426, 118611, 121441, 123169, 124602, 128344, 134359, 137492, 140735, 144100, 1453, 1499, 152185, 154313, 157922, 158297, 1639, 1663, 166614, 1739, 1894, 2009, 201625, 219736, 219844, 220134, 221150, 22…	7.83432e-06	KRIT1, MAD1L1, SLC25A5, PAFAH1B1, ZNF207, BRCA1, DDX11, TACC3, IFT88, CUL3, USP2, SPDL1, STAU2, SPATA7, USH2A, OFD1, RAD51, SDCCAG8, WAPL, GNAI3, ASPM, EML1, POLB, CDC42, RAD18, MCM2, GTSE1, WDR62, DLG1, KIFAP3, PTPN23, SPAG5, USP33, SPAG6, KIF22, PSEN1, TRAF5, GSK3B, PIBF1, KIF3C, MAPRE3, DNM1L, AURKA, TPX2, KIF9, KIF4A, EZR, CDC45, CDC6, SORBS1, CDC7, SPECC1L, MAPK1, ATP6V1D, DAAM1, VRK1, DIDO1…
650	GO:0036126	sperm flagellum	GOCC	32	-0.0375544	0.791848	0.321767	0.564563	down	11057, 152006, 158297, 1656, 4957, 55329, 6103, 8878	0.525238	DDX6, ODF2, RNF38, MNS1, ABHD2, SAXO1, RPGR, SQSTM1
692	GO:0000178	exosome (RNase complex)	GOCC	21	-0.0381687	0.788831	0.414741	0.653573	down	10200, 5393, 6832, 9567	0.617937	GTPBP1, EXOSC9, MPHOSPH6, SUPV3L1
696	GO:1905354	exoribonuclease complex	GOCC	21	-0.0381687	0.788831	0.414741	0.653573	down	10200, 5393, 6832, 9567	0.617937	GTPBP1, EXOSC9, MPHOSPH6, SUPV3L1
363	GO:0045202	synapse	GOCC	425	-0.0382134	0.788612	0.000322645	0.00225851	down	10059, 10160, 1020, 10228, 10243, 10458, 11141, 1136, 1138, 1139, 127833, 140689, 143187, 1488, 1739, 1740, 1756, 1826, 2030, 2054, 2185, 221692, 22839, 22849, 22866, 22941, 23034, 23191, 23268, 23335, 23426, 23504, 23613, 23705, 2534, 2567, 2568, 2571, 25843, 25924, 26052, 26747, 26999, 27020, 2742, 285489, 2890, 2895, 2898, 2900, 2904, 2915, 2931, 2932, 29904, 29988, 30011, 320, 3382, 375, 3756…	0.00193587	ICA1, FYN, SAMD4A, NRXN3, LRRC7, SLC4A7, VAMP3, CBLN4, CYFIP2, RIMBP2, SDK2, PFN2, CAMK2A, NCK2, PICALM, NSF, DLG1, CTTNBP2, CHRNA3, KCNN2, PSEN1, DLGAP4, CADPS2, GSK3B, NUFIP1, SCAMP1, MTMR2, DNM1L, WDR7, GABRP, ZMYND8, USP14, GLRA2, EEA1, CDK16, EEF2K, DNAJA3, SYT17, HOMER2, CALB1, SLC17A7, GSK3A, PTN, APBA1, SH3GL2, DNMBP, CPEB3, PRKAR1A, STX2, PHACTR1, WASF1, SLC22A2, SLC29A1, FXR1, MOB4, PTK…
686	GO:0043601	nuclear replisome	GOCC	22	-0.0385818	0.786808	0.399029	0.63997	down	4172, 54107, 5422, 6117, 6118	0.606743	POLA1, MCM3, RPA2, RPA1, POLE3
366	GO:0099080	supramolecular complex	GOCC	406	-0.0386656	0.786399	0.000373814	0.00246278	down	10059, 10112, 10300, 10426, 10576, 10615, 10694, 10783, 10808, 10982, 11004, 11104, 124602, 140735, 1453, 147179, 154313, 154796, 157922, 158297, 1613, 1639, 1656, 166614, 1739, 2009, 201625, 220134, 221150, 22920, 22924, 22941, 22948, 22974, 23172, 24137, 2534, 259266, 26052, 26119, 26586, 27067, 27229, 27436, 2801, 283349, 283987, 29127, 342184, 347688, 348235, 3728, 3797, 3801, 3831, 3832, 383…	0.00207467	KRIT1, PAFAH1B1, ZNF207, FYN, CUL3, STAU2, ASPM, EML1, POLB, WDR1, ACTN1, GTSE1, DLG1, KIFAP3, SPAG5, SPAG6, KIF22, CARMIL1, KIF3C, MAPRE3, DNM1L, AURKA, TPX2, KIF9, KIF4A, EZR, NEFH, MID1, DNAJA3, RAB11A, VPS18, NEFM, RAB3D, DNAH11, DDX6, TRPV4, MDM1, KIF20A, NEK2, NEK6, HSPH1, PLS1, KIF18A, TBCC, AMOT, KLC1, TUBGCP3, TUBA4A, RAC2, MTUS1, MAP1S, CAMSAP1, HAUS8, KRT33B, MAP7, TTLL4, CKAP2, RAC1, …
367	GO:0099081	supramolecular polymer	GOCC	406	-0.0386656	0.786399	0.000373814	0.00246278	down	10059, 10112, 10300, 10426, 10576, 10615, 10694, 10783, 10808, 10982, 11004, 11104, 124602, 140735, 1453, 147179, 154313, 154796, 157922, 158297, 1613, 1639, 1656, 166614, 1739, 2009, 201625, 220134, 221150, 22920, 22924, 22941, 22948, 22974, 23172, 24137, 2534, 259266, 26052, 26119, 26586, 27067, 27229, 27436, 2801, 283349, 283987, 29127, 342184, 347688, 348235, 3728, 3797, 3801, 3831, 3832, 383…	0.00207467	KRIT1, PAFAH1B1, ZNF207, FYN, CUL3, STAU2, ASPM, EML1, POLB, WDR1, ACTN1, GTSE1, DLG1, KIFAP3, SPAG5, SPAG6, KIF22, CARMIL1, KIF3C, MAPRE3, DNM1L, AURKA, TPX2, KIF9, KIF4A, EZR, NEFH, MID1, DNAJA3, RAB11A, VPS18, NEFM, RAB3D, DNAH11, DDX6, TRPV4, MDM1, KIF20A, NEK2, NEK6, HSPH1, PLS1, KIF18A, TBCC, AMOT, KLC1, TUBGCP3, TUBA4A, RAC2, MTUS1, MAP1S, CAMSAP1, HAUS8, KRT33B, MAP7, TTLL4, CKAP2, RAC1, …
368	GO:0099512	supramolecular fiber	GOCC	406	-0.0386656	0.786399	0.000373814	0.00246278	down	10059, 10112, 10300, 10426, 10576, 10615, 10694, 10783, 10808, 10982, 11004, 11104, 124602, 140735, 1453, 147179, 154313, 154796, 157922, 158297, 1613, 1639, 1656, 166614, 1739, 2009, 201625, 220134, 221150, 22920, 22924, 22941, 22948, 22974, 23172, 24137, 2534, 259266, 26052, 26119, 26586, 27067, 27229, 27436, 2801, 283349, 283987, 29127, 342184, 347688, 348235, 3728, 3797, 3801, 3831, 3832, 383…	0.00207467	KRIT1, PAFAH1B1, ZNF207, FYN, CUL3, STAU2, ASPM, EML1, POLB, WDR1, ACTN1, GTSE1, DLG1, KIFAP3, SPAG5, SPAG6, KIF22, CARMIL1, KIF3C, MAPRE3, DNM1L, AURKA, TPX2, KIF9, KIF4A, EZR, NEFH, MID1, DNAJA3, RAB11A, VPS18, NEFM, RAB3D, DNAH11, DDX6, TRPV4, MDM1, KIF20A, NEK2, NEK6, HSPH1, PLS1, KIF18A, TBCC, AMOT, KLC1, TUBGCP3, TUBA4A, RAC2, MTUS1, MAP1S, CAMSAP1, HAUS8, KRT33B, MAP7, TTLL4, CKAP2, RAC1, …
369	GO:0099513	polymeric cytoskeletal fiber	GOCC	406	-0.0386656	0.786399	0.000373814	0.00246278	down	10059, 10112, 10300, 10426, 10576, 10615, 10694, 10783, 10808, 10982, 11004, 11104, 124602, 140735, 1453, 147179, 154313, 154796, 157922, 158297, 1613, 1639, 1656, 166614, 1739, 2009, 201625, 220134, 221150, 22920, 22924, 22941, 22948, 22974, 23172, 24137, 2534, 259266, 26052, 26119, 26586, 27067, 27229, 27436, 2801, 283349, 283987, 29127, 342184, 347688, 348235, 3728, 3797, 3801, 3831, 3832, 383…	0.00207467	KRIT1, PAFAH1B1, ZNF207, FYN, CUL3, STAU2, ASPM, EML1, POLB, WDR1, ACTN1, GTSE1, DLG1, KIFAP3, SPAG5, SPAG6, KIF22, CARMIL1, KIF3C, MAPRE3, DNM1L, AURKA, TPX2, KIF9, KIF4A, EZR, NEFH, MID1, DNAJA3, RAB11A, VPS18, NEFM, RAB3D, DNAH11, DDX6, TRPV4, MDM1, KIF20A, NEK2, NEK6, HSPH1, PLS1, KIF18A, TBCC, AMOT, KLC1, TUBGCP3, TUBA4A, RAC2, MTUS1, MAP1S, CAMSAP1, HAUS8, KRT33B, MAP7, TTLL4, CKAP2, RAC1, …
541	GO:0030117	membrane coat	GOCC	78	-0.0388669	0.785415	0.110827	0.270821	down	10483, 10717, 10802, 10947, 1315, 161, 163, 164, 22820, 22905, 23163, 25977, 26119, 26958, 26985, 57410, 57617, 58513, 65082, 80115, 8120, 8301, 83988, 8546, 9276, 9632, 9779	0.246036	AP2B1, AP3M2, EPN2, PICALM, NECAP1, SEC23B, AP3B2, VPS18, NCALD, SEC24A, GGA3, EPS15L1, BAIAP2L2, COPB1, TBC1D5, AP3B1, AP4B1, VPS33A, SCYL1, LDLRAP1, COPG2, AP1G1, SEC24C, COPG1, AP2A2, COPB2, AP3M1
542	GO:0048475	coated membrane	GOCC	78	-0.0388669	0.785415	0.110827	0.270821	down	10483, 10717, 10802, 10947, 1315, 161, 163, 164, 22820, 22905, 23163, 25977, 26119, 26958, 26985, 57410, 57617, 58513, 65082, 80115, 8120, 8301, 83988, 8546, 9276, 9632, 9779	0.246036	AP2B1, AP3M2, EPN2, PICALM, NECAP1, SEC23B, AP3B2, VPS18, NCALD, SEC24A, GGA3, EPS15L1, BAIAP2L2, COPB1, TBC1D5, AP3B1, AP4B1, VPS33A, SCYL1, LDLRAP1, COPG2, AP1G1, SEC24C, COPG1, AP2A2, COPB2, AP3M1
536	GO:0000123	histone acetyltransferase complex	GOCC	79	-0.0389558	0.784982	0.107815	0.26834	down	10943, 11091, 11143, 117143, 27097, 51562, 51616, 54107, 55578, 55689, 6877, 6880, 7862, 79595, 8089, 8464, 9736, 9767, 9898	0.244234	MSL3, JADE3, SUPT20H, USP34, YEATS4, TAF5L, KAT7, SAP130, UBAP2L, POLE3, TAF5, MBIP, TADA1, BRPF1, YEATS2, TAF9B, SUPT3H, WDR5, TAF9
391	GO:0044456	synapse part	GOCC	325	-0.0389966	0.784783	0.00126945	0.00687962	down	10059, 10160, 1020, 10228, 10243, 10458, 11141, 1136, 1138, 1139, 127833, 143187, 1739, 1740, 1756, 2030, 2054, 2185, 22866, 22941, 23335, 23426, 23613, 2534, 2567, 2568, 2571, 25843, 26052, 26747, 27020, 2742, 2890, 2895, 2898, 2900, 2904, 2915, 2931, 2932, 29904, 29988, 320, 3382, 375, 3756, 3781, 440279, 4905, 51138, 5127, 51305, 51760, 5217, 5501, 5663, 57030, 5728, 57451, 57554, 5799, 64506,…	0.00593303	ICA1, FYN, NRXN3, LRRC7, PFN2, CAMK2A, PICALM, NSF, DLG1, CTTNBP2, CHRNA3, KCNN2, PSEN1, CADPS2, GSK3B, NUFIP1, SCAMP1, MTMR2, DNM1L, WDR7, GABRP, ZMYND8, GLRA2, EEA1, CDK16, EEF2K, DNAJA3, SYT17, HOMER2, CALB1, SLC17A7, GSK3A, APBA1, STX2, SLC22A2, SLC29A1, FXR1, MOB4, PTK2B, NR1D1, GAD1, STX6, SLC2A8, GABBR2, UNC13C, ATAD1, COPS4, KCNH1, ARF1, SYT2, TENM2, GRIK4, CNKSR2, DLG2, CACNA1C, VTI1A, T…
489	GO:0098858	actin-based cell projection	GOCC	111	-0.0394625	0.782514	0.0540322	0.163557	down	10160, 1020, 10458, 10630, 1499, 1515, 1756, 257629, 25861, 25932, 25983, 26031, 26230, 382, 4354, 4646, 4651, 51741, 526, 54084, 5420, 55740, 56776, 57451, 5756, 57698, 59341, 60412, 65059, 7399, 7408, 7430, 83874, 9455, 9497, 9732, 998	0.149939	SLC4A7, USH2A, CDC42, OSBPL3, EZR, WHRN, TBC1D10A, HOMER2, TRPV4, VASP, DOCK4, PODXL, NGDN, MPP1, EXOC4, CTSV, MYO10, TENM2, TIAM2, ATP6V1B2, TWF1, FARP1, ENAH, FMN2, PDPN, CDK5, ARF6, CTNNB1, CLIC4, RAPH1, ANKS4B, BAIAP2, TSPEAR, WWOX, SHTN1, MYO6, DMD
571	GO:0000792	heterochromatin	GOCC	59	-0.0396387	0.781657	0.157224	0.347547	down	10951, 115426, 146956, 157570, 1656, 1786, 1788, 222229, 29128, 4999, 56254, 57167, 57332, 6045, 6304, 7155, 7319, 9031, 9810	0.318755	BAZ1B, TOP2B, UBE2A, SALL4, RNF40, CBX1, DDX6, ORC2, DNMT3A, RNF2, DNMT1, CBX8, UHRF2, EME1, RNF20, LRWD1, ESCO2, SATB1, UHRF1
665	GO:0030669	clathrin-coated endocytic vesicle membrane	GOCC	25	-0.0400373	0.779723	0.351704	0.593832	down	161, 163, 164, 2209, 22905, 26119, 6456, 8301, 9779	0.55179	AP2B1, EPN2, PICALM, SH3GL2, TBC1D5, FCGR1A, LDLRAP1, AP1G1, AP2A2
440	GO:0019898	extrinsic component of membrane	GOCC	172	-0.0403289	0.778312	0.0146719	0.0577505	down	10160, 11252, 132001, 1495, 1499, 2037, 2185, 22863, 246, 2534, 257019, 2674, 2675, 27131, 27347, 2773, 283987, 29116, 29127, 3728, 51025, 5127, 51429, 5289, 5293, 5295, 54331, 54843, 56270, 57669, 58533, 5879, 6000, 640, 6643, 6768, 7074, 7430, 7525, 83850, 8411, 84978, 8650, 8678, 8723, 8724, 8826, 8897, 9093, 9267, 94120, 9630, 9810	0.0534808	MYLIP, FYN, CTNNA1, GNAI3, PIK3C3, EPB41L2, SNX5, EZR, PACSIN2, MTMR3, EEA1, CDK16, DNAJA3, RNF40, CYTH1, SNX3, SNX4, EPB41L5, PTK2B, BECN1, ATG14, SNX6, SNX9, NUMB, RAC1, BLK, SYTL2, IQGAP1, WDR45B, TAMM41, PIK3R1, ST14, GFRA1, FARP1, GNA14, TIAM1, ESYT3, RACGAP1, ALOX15, SYTL3, HID1, CTNNB1, GFRA2, PIK3CD, FRMD5, FRMD3, JUP, YES1, RGS7, GNG2, STK39, SNX2, PAM16
635	GO:0016592	mediator complex	GOCC	32	-0.0404112	0.777914	0.287887	0.524283	down	1024, 116931, 51586, 5469, 80306, 9412, 9477	0.48787	MED15, MED28, MED20, MED1, CDK8, MED12L, MED21
467	GO:0097060	synaptic membrane	GOCC	134	-0.0404937	0.777515	0.0302472	0.101631	down	1020, 10243, 11141, 1136, 1138, 1139, 1739, 1740, 1756, 22866, 22941, 23426, 2567, 2568, 27020, 2742, 2890, 2895, 2898, 2900, 2904, 375, 3756, 440279, 5728, 57451, 57554, 64506, 6809, 80059, 815, 8301, 84896, 85445, 8898, 9093, 9228, 9229, 93664, 9455, 9568	0.0939144	LRRC7, CAMK2A, PICALM, DLG1, CHRNA3, CADPS2, MTMR2, GABRP, GLRA2, DNAJA3, HOMER2, GABBR2, UNC13C, ATAD1, KCNH1, ARF1, TENM2, GRIK4, CNKSR2, DLG2, GRID2, CNTNAP4, GRIA1, GRIP1, NPTN, SHANK2, GRIK2, CDK5, STX3, IL1RAPL1, CHRNA5, DLGAP1, GPHN, PTEN, CHRNA7, LRRTM4, GABRG3, DLGAP2, DMD, CPEB1, GRIN2B
578	GO:0000118	histone deacetylase complex	GOCC	52	-0.040626	0.776876	0.173815	0.37542	down	138151, 1457, 23314, 25942, 26060, 473, 54815, 55198, 57459, 5928, 5931, 64426, 7764, 79595, 79718, 9734	0.347129	HDAC9, CSNK2A1, RBBP7, SUDS3, SATB2, APPL2, SAP130, RERE, GATAD2B, NACC2, APPL1, RBBP4, GATAD2A, SIN3A, ZNF217, TBL1XR1
331	GO:1990234	transferase complex	GOCC	609	-0.0406697	0.776665	6.14863e-06	6.45606e-05	down	1017, 1022, 10238, 1025, 1027, 10425, 10580, 10621, 10622, 10891, 10935, 10943, 11036, 11060, 11065, 11091, 11128, 11143, 11146, 114818, 114907, 1163, 117143, 121551, 123169, 126433, 143384, 1642, 167153, 1763, 1911, 2071, 2146, 22863, 22938, 23032, 23054, 23194, 23248, 23276, 23510, 255488, 25793, 25827, 25853, 25879, 25896, 26121, 26133, 26234, 26260, 26269, 26512, 267, 27097, 27252, 27430, 286…	5.24998e-05	MSL3, JARID2, BRCA1, RNF14, RB1CC1, TBPL1, CUL3, MAT2B, DCUN1D1, HDAC9, CUL1, RNF4, RAD18, UBE2D1, KLHL20, USP33, UBE2A, PIK3C3, DNAJA1, GMCL1, TRMT6, BRAP, CDC23, SORBS1, FBXO7, SNW1, ASB2, TRPC4AP, POLA1, RBBP7, EEA1, JADE3, SUPT20H, INTS6, UBE2I, RNF40, INTS9, PIAS4, PRPF31, CBLL1, OGDH, EZH2, PRKAG2, CUL2, TRIM37, SMURF2, PRKAR1A, FBXW7, PPARGC1A, GTF2H1, KCTD10, CDKN1B, PRKAB1, PHC1, MCM3, R…
583	GO:0030665	clathrin-coated vesicle membrane	GOCC	50	-0.0409638	0.775247	0.178818	0.38	down	161, 163, 164, 2209, 22905, 2571, 25977, 26119, 4646, 57030, 6456, 8120, 8301, 83988, 8546, 9341, 9779	0.352167	AP2B1, VAMP3, EPN2, PICALM, NECAP1, AP3B2, NCALD, SLC17A7, SH3GL2, GAD1, TBC1D5, AP3B1, FCGR1A, LDLRAP1, AP1G1, AP2A2, MYO6
552	GO:0031514	motile cilium	GOCC	64	-0.0413068	0.773596	0.125513	0.294224	down	11057, 118611, 152006, 154313, 154865, 158297, 1656, 23002, 3091, 3948, 4957, 55329, 585, 6103, 8100, 83447, 83853, 8878, 9576	0.269527	IFT88, SPAG6, DAAM1, HIF1A, DDX6, ODF2, RNF38, MNS1, BBS4, ABHD2, ROPN1L, SLC25A31, C10orf90, SAXO1, RPGR, SQSTM1, IQUB, LDHC, CFAP206
497	GO:0060076	excitatory synapse	GOCC	95	-0.0414057	0.773121	0.0617939	0.180546	down	1020, 10458, 1136, 1739, 1740, 2185, 22941, 2534, 26052, 27020, 2890, 2898, 2915, 29904, 375, 4905, 57030, 57554, 64506, 775, 81831, 8898, 9228, 9229, 9455	0.166282	FYN, LRRC7, NSF, DLG1, CHRNA3, MTMR2, EEF2K, HOMER2, SLC17A7, PTK2B, ARF1, DLG2, CACNA1C, GRIA1, NPTN, SHANK2, GRIK2, CDK5, GRM5, DLGAP1, NETO2, BAIAP2, DNM3, DLGAP2, CPEB1
563	GO:0031234	extrinsic component of cytoplasmic side of plasma membrane	GOCC	57	-0.0422333	0.769154	0.139548	0.316811	down	10160, 2185, 246, 2534, 27131, 2773, 29127, 5127, 51429, 54331, 6000, 640, 7074, 7525, 83850, 8826, 9267, 9630	0.29226	FYN, GNAI3, SNX5, CDK16, CYTH1, PTK2B, SNX9, BLK, IQGAP1, FARP1, GNA14, TIAM1, ESYT3, RACGAP1, ALOX15, YES1, RGS7, GNG2
614	GO:0042734	presynaptic membrane	GOCC	36	-0.0424513	0.768113	0.237429	0.459805	down	27020, 2898, 2900, 3756, 440279, 6809, 815, 8301, 85445, 93664	0.426796	CAMK2A, PICALM, CADPS2, UNC13C, KCNH1, GRIK4, CNTNAP4, NPTN, GRIK2, STX3
494	GO:0014069	postsynaptic density	GOCC	90	-0.0429052	0.765949	0.0598967	0.176538	down	1020, 10458, 1136, 1739, 1740, 2185, 22941, 2534, 26052, 27020, 2890, 2898, 2915, 29904, 375, 4905, 57554, 64506, 775, 81831, 8898, 9228, 9229, 9455	0.163154	FYN, LRRC7, NSF, DLG1, CHRNA3, MTMR2, EEF2K, HOMER2, PTK2B, ARF1, DLG2, CACNA1C, GRIA1, NPTN, SHANK2, GRIK2, CDK5, GRM5, DLGAP1, NETO2, BAIAP2, DNM3, DLGAP2, CPEB1
495	GO:0099572	postsynaptic specialization	GOCC	90	-0.0429052	0.765949	0.0598967	0.176538	down	1020, 10458, 1136, 1739, 1740, 2185, 22941, 2534, 26052, 27020, 2890, 2898, 2915, 29904, 375, 4905, 57554, 64506, 775, 81831, 8898, 9228, 9229, 9455	0.163154	FYN, LRRC7, NSF, DLG1, CHRNA3, MTMR2, EEF2K, HOMER2, PTK2B, ARF1, DLG2, CACNA1C, GRIA1, NPTN, SHANK2, GRIK2, CDK5, GRM5, DLGAP1, NETO2, BAIAP2, DNM3, DLGAP2, CPEB1
428	GO:0098793	presynapse	GOCC	169	-0.0431242	0.764908	0.00990137	0.0413275	down	10059, 1020, 10228, 127833, 143187, 2054, 23335, 2571, 26747, 27020, 2890, 2898, 2900, 29988, 320, 3382, 3756, 440279, 51138, 5127, 51305, 51760, 5217, 5663, 57030, 5799, 6582, 6809, 6854, 7416, 793, 815, 81565, 81615, 8224, 8301, 83992, 8411, 85445, 8898, 9001, 93664, 9369, 94120, 9522, 9899	0.0385632	ICA1, NRXN3, PFN2, CAMK2A, PICALM, CTTNBP2, PSEN1, CADPS2, NUFIP1, SCAMP1, MTMR2, DNM1L, WDR7, EEA1, CDK16, SYT17, CALB1, SLC17A7, APBA1, STX2, SLC22A2, GAD1, STX6, SLC2A8, UNC13C, COPS4, KCNH1, SYT2, GRIK4, VTI1A, TMEM163, CNTNAP4, PTPRN2, GRIA1, NPTN, SYN2, GRIK2, SYTL3, CDK5, NDEL1, STX3, KCNK9, HAP1, SV2B, SYN3, VDAC1
628	GO:0008076	voltage-gated potassium channel complex	GOCC	29	-0.043536	0.762953	0.277132	0.514454	down	1740, 1804, 23630, 26047, 3756, 3763, 3790, 57463, 57582, 801, 80333, 805	0.47878	KCNT1, DPP6, KCNH1, CALM2, DLG2, KCNJ6, KCNS3, CNTNAP2, KCNE5, AMIGO1, KCNIP4, CALM1
629	GO:0034705	potassium channel complex	GOCC	29	-0.043536	0.762953	0.277132	0.514454	down	1740, 1804, 23630, 26047, 3756, 3763, 3790, 57463, 57582, 801, 80333, 805	0.47878	KCNT1, DPP6, KCNH1, CALM2, DLG2, KCNJ6, KCNS3, CNTNAP2, KCNE5, AMIGO1, KCNIP4, CALM1
419	GO:0098794	postsynapse	GOCC	181	-0.0436022	0.762639	0.00702351	0.0310513	down	10160, 1020, 10243, 10458, 11141, 1136, 1138, 1139, 1739, 1740, 1756, 2030, 2185, 22866, 22941, 23426, 23613, 2534, 2567, 2568, 25843, 26052, 27020, 2742, 2890, 2895, 2898, 2900, 2904, 2915, 2931, 2932, 29904, 375, 3781, 4905, 5501, 57030, 5728, 57451, 57554, 64506, 6546, 7074, 775, 80059, 8087, 81831, 8301, 83992, 84896, 8898, 9093, 9228, 9229, 93664, 9455, 9568, 9572	0.0290893	FYN, LRRC7, PICALM, NSF, DLG1, CTTNBP2, CHRNA3, KCNN2, CADPS2, GSK3B, MTMR2, GABRP, ZMYND8, GLRA2, EEF2K, DNAJA3, HOMER2, SLC17A7, GSK3A, SLC29A1, FXR1, MOB4, PTK2B, NR1D1, GABBR2, ATAD1, ARF1, TENM2, GRIK4, CNKSR2, DLG2, CACNA1C, GRID2, FARP1, GRIA1, GRIP1, TIAM1, NPTN, SHANK2, GRIK2, CDK5, GRM5, IL1RAPL1, CHRNA5, DLGAP1, NETO2, GPHN, PTEN, CHRNA7, BAIAP2, LRRTM4, GABRG3, SLC8A1, PPP1CC, DNM3, D…
426	GO:0045177	apical part of cell	GOCC	168	-0.0436359	0.762479	0.00929654	0.039291	down	10207, 11136, 1139, 114569, 121441, 126206, 1499, 1515, 182, 2030, 222962, 22941, 23043, 25932, 27347, 29899, 3326, 3705, 3710, 4072, 4257, 441161, 4646, 481, 5144, 51458, 51626, 5244, 528, 5420, 54716, 55763, 5664, 5728, 5873, 5874, 59341, 64241, 6518, 6809, 6813, 6845, 705, 7399, 7430, 79659, 84260, 84612, 8650, 9341, 9455, 948, 9497, 989, 998	0.036528	ABCB4, MGST1, SLC7A9, SLC4A7, RAB27B, USH2A, VAMP3, RAB27A, CDC42, STXBP2, EXOC1, EZR, HSP90AB1, ITPR3, ITPK1, JAG1, HOMER2, TRPV4, BYSL, SLC29A1, PDE4D, EPCAM, GPSM2, SEPTIN7, PARD6B, VAMP7, PODXL, PATJ, NUMB, CD36, CTSV, DYNC2LI1, NEDD1, TCHP, RHCG, SLC2A5, ATP1B1, PSEN2, ABCG8, MAL2, TNIK, ATP6V1C1, SHANK2, SLC6A20, SLC29A4, STX3, CTNNB1, CLIC4, NLRP5, PTEN, CHRNA7, DYNC2H1, MYO6, STK39, OOEP
324	GO:0044427	chromosomal part	GOCC	641	-0.0441222	0.760178	5.76753e-07	6.79961e-06	down	10036, 10051, 10111, 1017, 10388, 1058, 10592, 10615, 10622, 10728, 10891, 10919, 10951, 11004, 1111, 11130, 11168, 115426, 116138, 132243, 138151, 142, 1457, 146956, 1499, 151246, 157570, 1639, 1642, 1656, 1663, 1763, 1786, 1788, 1869, 2146, 220134, 221150, 222229, 22938, 23028, 23063, 23064, 23236, 23244, 23397, 23594, 24144, 2551, 25842, 25913, 25936, 25942, 25983, 2625, 26277, 26747, 27309, 2…	5.69063e-06	MAD1L1, KDM1A, PAFAH1B1, BAZ1B, ZNF207, BRCA1, DDX11, NLRP2, CENPQ, SPDL1, RAD51, THOC3, MXD1, WAPL, PMS1, PPP2R5A, NUP133, RAD18, SMC1A, MCM2, TP63, TIPIN, SPAG5, TOP2B, UBE2A, KIF22, SMARCA2, PSEN1, TCF7, NUFIP1, SEH1L, ORC1, AURKA, ORC6, HNRNPC, TOX4, TINF2, CDC45, MSH2, TFIP11, SNW1, MYBL2, SALL4, CSNK2A1, E2F1, ACTR5, POLA1, UBE2I, RNF40, MCM4, ASF1B, EZH2, SETX, GATA3, SMC3, RAD51C, CBX1, Z…
318	GO:0005694	chromosome	GOCC	735	-0.0442914	0.759379	9.12115e-08	1.20185e-06	down	10036, 10051, 10111, 1017, 10199, 10388, 1058, 10592, 10615, 10622, 10728, 10771, 10891, 10919, 10951, 11004, 1111, 11130, 11168, 115426, 116138, 120, 132243, 138151, 142, 1457, 146956, 1499, 151246, 157313, 157570, 1639, 1642, 1656, 1663, 1763, 1786, 1788, 1869, 2146, 2177, 220134, 221150, 222229, 22920, 22938, 23028, 23063, 23064, 23236, 23244, 23397, 23594, 24137, 24144, 2551, 25842, 25896, 25…	9.87754e-07	MAD1L1, KDM1A, PAFAH1B1, BAZ1B, SPRTN, ZNF207, BRCA1, DDX11, ZMYND11, NLRP2, HMGB3, CENPQ, SPDL1, RAD51, THOC3, MXD1, WAPL, PMS1, PPP2R5A, NUP133, RAD18, SMC1A, MCM2, TP63, TIPIN, KIFAP3, SPAG5, TOP2B, UBE2A, KIF22, SMARCA2, PSEN1, TCF7, NUFIP1, SEH1L, ORC1, AURKA, NSFL1C, KIF4A, ORC6, HNRNPC, TOX4, TINF2, CDC45, MSH2, TFIP11, SNW1, MYBL2, SALL4, CSNK2A1, E2F1, ACTR5, RBBP8, POLA1, UBE2I, RNF40, …
458	GO:0044450	microtubule organizing center part	GOCC	123	-0.044391	0.758909	0.0233136	0.0826434	down	10300, 10426, 10464, 10615, 10806, 11190, 116840, 118611, 121441, 134359, 152185, 158297, 27229, 27241, 284403, 440145, 4750, 4957, 55165, 55835, 56890, 585, 5901, 64793, 672, 6790, 7153, 8100, 8481, 85302, 899, 9001, 9657	0.075031	BRCA1, IFT88, OFD1, SDCCAG8, WDR62, SPAG5, PIBF1, AURKA, MDM1, BBS9, CEP250, TUBGCP3, CEP85, TOP2A, RAN, ODF2, NEK1, TUBGCP4, CEP55, NEDD1, BBS4, KATNB1, CENPJ, POC5, C10orf90, SAXO1, CCNF, SPICE1, CNTROB, IQCB1, HAP1, FBF1, MZT1
588	GO:0009295	nucleoid	GOCC	40	-0.044772	0.757115	0.190038	0.396602	down	10845, 116447, 1763, 22907, 292, 3313, 5442, 54931, 55379, 60528, 64216, 6472, 6832, 7416, 80298, 9361	0.366857	SLC25A5, ELAC2, POLRMT, LRRC59, HSPA9, MTERF2, DHX30, DNA2, SUPV3L1, TFB2M, CLPX, TRMT10C, SHMT2, TOP1MT, LONP1, VDAC1
589	GO:0042645	mitochondrial nucleoid	GOCC	40	-0.044772	0.757115	0.190038	0.396602	down	10845, 116447, 1763, 22907, 292, 3313, 5442, 54931, 55379, 60528, 64216, 6472, 6832, 7416, 80298, 9361	0.366857	SLC25A5, ELAC2, POLRMT, LRRC59, HSPA9, MTERF2, DHX30, DNA2, SUPV3L1, TFB2M, CLPX, TRMT10C, SHMT2, TOP1MT, LONP1, VDAC1
572	GO:0031519	PcG protein complex	GOCC	43	-0.0463227	0.749854	0.160357	0.353312	down	10336, 10389, 1457, 1911, 2146, 3720, 4591, 57332, 5928, 5931, 6045, 6500, 84108, 84678, 9898	0.323631	JARID2, KDM2B, CSNK2A1, RBBP7, SCML2, EZH2, TRIM37, PHC1, SKP1, RNF2, CBX8, UBAP2L, PCGF6, RBBP4, PCGF3
624	GO:0000407	pre-autophagosomal structure	GOCC	27	-0.0468868	0.747229	0.259911	0.489243	down	22863, 22878, 23673, 56270, 64771, 8678, 8878, 9474, 9821	0.456128	RB1CC1, ATG5, STX12, BECN1, ATG14, WDR45B, TRAPPC8, SQSTM1, ILRUN
646	GO:0031312	extrinsic component of organelle membrane	GOCC	21	-0.0471608	0.745958	0.317524	0.560043	down	132001, 22863, 27131, 283987, 51025	0.520224	SNX5, ATG14, TAMM41, HID1, PAM16
654	GO:0030125	clathrin vesicle coat	GOCC	20	-0.0472009	0.745772	0.328899	0.567719	down	161, 163, 22905, 25977, 26119, 8301, 83988, 9779	0.527188	AP2B1, EPN2, PICALM, NECAP1, NCALD, TBC1D5, LDLRAP1, AP2A2
513	GO:0005930	axoneme	GOCC	62	-0.047857	0.742738	0.0822577	0.223794	down	124602, 154313, 158297, 22863, 22920, 51473, 51626, 5289, 55329, 55567, 55812, 7289, 79659, 8632, 9474, 9576, 989	0.206341	SPATA7, ATG5, KIFAP3, SPAG6, PIK3C3, TULP3, SEPTIN7, ATG14, DYNC2LI1, MNS1, DCDC2, SAXO1, DNAH3, DYNC2H1, DNAH17, KIF19, CFAP206
514	GO:0097014	ciliary plasm	GOCC	62	-0.047857	0.742738	0.0822577	0.223794	down	124602, 154313, 158297, 22863, 22920, 51473, 51626, 5289, 55329, 55567, 55812, 7289, 79659, 8632, 9474, 9576, 989	0.206341	SPATA7, ATG5, KIFAP3, SPAG6, PIK3C3, TULP3, SEPTIN7, ATG14, DYNC2LI1, MNS1, DCDC2, SAXO1, DNAH3, DYNC2H1, DNAH17, KIF19, CFAP206
533	GO:0099023	tethring complex	GOCC	55	-0.0480426	0.741881	0.100268	0.253931	down	10466, 10640, 22796, 22878, 23256, 25924, 29091, 55763, 57511, 57617, 5899, 60412, 64400, 65082	0.232333	EXOC5, EXOC1, SCFD1, VPS18, EXOC4, COG6, COG2, VPS33A, RALB, TRAPPC8, COG5, AKTIP, STXBP6, MYRIP
569	GO:0005902	microvillus	GOCC	40	-0.0485592	0.739503	0.156309	0.346665	down	10630, 1499, 1515, 257629, 25932, 4646, 51741, 526, 5420, 56776, 60412, 7430, 83874	0.318353	EZR, TBC1D10A, PODXL, EXOC4, CTSV, ATP6V1B2, FMN2, PDPN, CTNNB1, CLIC4, ANKS4B, WWOX, MYO6
335	GO:0044454	nuclear chromosome part	GOCC	380	-0.0491391	0.736843	1.505e-05	0.000148729	down	10036, 10111, 10388, 1058, 10622, 10891, 10919, 10951, 115426, 116138, 138151, 142, 1457, 146956, 1499, 157570, 1642, 1663, 1763, 1788, 1869, 2146, 222229, 23028, 23063, 23236, 23594, 24144, 2551, 25842, 25913, 25942, 2625, 26277, 26747, 285498, 29128, 3014, 3183, 3659, 4084, 4087, 4171, 4172, 4173, 4221, 4436, 4772, 4998, 4999, 5000, 5001, 50511, 5074, 5111, 51659, 5347, 5378, 54107, 5422, 54962…	0.000121494	KDM1A, BAZ1B, BRCA1, DDX11, NLRP2, RAD51, THOC3, MXD1, WAPL, PMS1, MCM2, TP63, TIPIN, UBE2A, SMARCA2, TCF7, NUFIP1, ORC1, AURKA, ORC6, HNRNPC, TOX4, TINF2, CDC45, MSH2, TFIP11, CSNK2A1, E2F1, ACTR5, POLA1, UBE2I, MCM4, ASF1B, EZH2, GATA3, SMC3, CBX1, PPARGC1A, TIMELESS, SUDS3, ASF1A, MCM3, TBP, POLR3G, RAD1, RAD50, ACTR8, CENPA, STAT1, ORC2, ORC4, RPA2, DNMT3A, RNF2, LRIF1, NCOA3, KLHDC3, IRF1, N…
470	GO:0031248	protein acetyltransferase complex	GOCC	88	-0.0497842	0.733895	0.0317243	0.104504	down	10943, 11091, 11143, 117143, 27097, 51126, 51562, 51616, 54107, 55578, 55689, 60560, 6877, 6880, 7862, 79595, 80218, 8089, 8464, 9736, 9767, 9898	0.0958203	MSL3, JADE3, SUPT20H, USP34, NAA50, YEATS4, NAA35, TAF5L, KAT7, SAP130, UBAP2L, POLE3, TAF5, MBIP, TADA1, BRPF1, YEATS2, NAA20, TAF9B, SUPT3H, WDR5, TAF9
471	GO:1902493	acetyltransferase complex	GOCC	88	-0.0497842	0.733895	0.0317243	0.104504	down	10943, 11091, 11143, 117143, 27097, 51126, 51562, 51616, 54107, 55578, 55689, 60560, 6877, 6880, 7862, 79595, 80218, 8089, 8464, 9736, 9767, 9898	0.0958203	MSL3, JADE3, SUPT20H, USP34, NAA50, YEATS4, NAA35, TAF5L, KAT7, SAP130, UBAP2L, POLE3, TAF5, MBIP, TADA1, BRPF1, YEATS2, NAA20, TAF9B, SUPT3H, WDR5, TAF9
449	GO:0030136	clathrin-coated vesicle	GOCC	106	-0.0497858	0.733888	0.0185445	0.0683471	down	10228, 143187, 161, 163, 164, 201294, 2209, 22905, 23245, 2571, 25977, 26119, 4643, 4646, 4952, 51324, 51429, 51552, 5244, 55788, 57030, 57617, 5873, 5874, 6272, 6456, 65082, 79958, 8120, 8301, 83988, 8546, 8650, 8724, 9341, 9522, 9779, 9892	0.0626053	ABCB4, AP2B1, RAB27B, VAMP3, SNAP91, RAB27A, EPN2, PICALM, SCAMP1, NECAP1, SPG21, UNC13D, AP3B2, VPS18, NCALD, SLC17A7, SH3GL2, SNX3, RAB14, OCRL, GAD1, SNX9, TBC1D5, AP3B1, NUMB, SORT1, STX6, VPS33A, ASTN2, FCGR1A, VTI1A, MYO1E, LDLRAP1, AP1G1, LMBRD1, AP2A2, MYO6, DENND1C
455	GO:0034702	ion channel complex	GOCC	100	-0.0498134	0.733762	0.0220744	0.0793073	down	1136, 1138, 1139, 1739, 1740, 1804, 2185, 221154, 22908, 22941, 23630, 2567, 2568, 25932, 26047, 2742, 2890, 2895, 2898, 2900, 2904, 342372, 3756, 3763, 3790, 5144, 55013, 55799, 56262, 57463, 57582, 775, 801, 80333, 805, 90550, 91404, 9254, 94015	0.0720665	MCUB, CACNA2D2, DLG1, CHRNA3, GABRP, GLRA2, KCNT1, PDE4D, PTK2B, DPP6, LRRC8A, TTYH2, KCNH1, CALM2, GRIK4, DLG2, CACNA1C, GRID2, GRIA1, MCU, CACNA2D3, KCNJ6, SHANK2, GRIK2, MICU2, CLIC4, CHRNA5, KCNS3, CNTNAP2, CHRNA7, KCNE5, AMIGO1, GABRG3, KCNIP4, SESTD1, CALM1, SACM1L, GRIN2B, PKD1L3
329	GO:0000228	nuclear chromosome	GOCC	410	-0.0505097	0.730594	4.09047e-06	4.43354e-05	down	10036, 10111, 10388, 1058, 10592, 10622, 10891, 10919, 10951, 1111, 115426, 116138, 120, 138151, 142, 1457, 146956, 1499, 157570, 1642, 1663, 1763, 1788, 1869, 2146, 222229, 22920, 23028, 23063, 23064, 23236, 23594, 24144, 2551, 25842, 25913, 25942, 2625, 26277, 26747, 285498, 29128, 3014, 3183, 3659, 4084, 4087, 4171, 4172, 4173, 4221, 4436, 4437, 4751, 4772, 4998, 4999, 5000, 5001, 50511, 5074,…	3.63234e-05	KDM1A, BAZ1B, BRCA1, DDX11, NLRP2, RAD51, THOC3, MXD1, WAPL, PMS1, SMC1A, MCM2, TP63, TIPIN, KIFAP3, UBE2A, SMARCA2, TCF7, NUFIP1, ORC1, AURKA, ORC6, HNRNPC, TOX4, TINF2, CDC45, MSH2, TFIP11, CSNK2A1, E2F1, ACTR5, POLA1, UBE2I, MCM4, ASF1B, EZH2, SETX, GATA3, SMC3, RAD51C, CBX1, PPARGC1A, TIMELESS, SUDS3, ASF1A, MCM3, TBP, MSH3, POLR3G, RAD1, RAD50, ACTR8, CENPA, STAT1, ORC2, ORC4, NEK2, RPA2, DN…
537	GO:0015030	Cajal body	GOCC	45	-0.052083	0.723485	0.10754	0.26834	down	1017, 11325, 26121, 4863, 6606, 79607, 8161, 9129, 9221, 9343, 96764, 9733	0.244234	SART3, PRPF31, EFTUD2, PRPF3, COIL, CDK2, TGS1, NPAT, NOLC1, SMN1, FAM118B, DDX42
442	GO:0000784	nuclear chromosome, telomeric region	GOCC	101	-0.0527214	0.72062	0.0150565	0.0578171	down	10111, 10951, 142, 1642, 1763, 23028, 24144, 25913, 26277, 4171, 4172, 4173, 4221, 4436, 4998, 4999, 5000, 5001, 5111, 5501, 55226, 55655, 55791, 5888, 6117, 6118, 675, 7013, 79577, 84321, 983, 9878	0.0534808	KDM1A, NLRP2, RAD51, THOC3, MCM2, ORC1, TOX4, TINF2, MSH2, TFIP11, MCM4, CBX1, MCM3, RAD50, ORC2, ORC4, RPA2, LRIF1, POT1, RPA1, PCNA, MEN1, CDC73, NAT10, DNA2, BRCA2, PARP1, TERF1, ORC5, DDB1, CDK1, PPP1CC
424	GO:0030496	midbody	GOCC	119	-0.0533441	0.717837	0.00767725	0.0328606	down	10112, 10190, 10300, 10615, 11104, 153020, 1663, 1894, 22924, 23172, 23636, 24137, 259266, 25932, 27309, 2773, 29127, 382, 4751, 51097, 51100, 5289, 5347, 5501, 55143, 55165, 55207, 55920, 5898, 5899, 5901, 6790, 79720, 79801, 84440, 8826, 9025, 9055, 9212, 9493, 9585, 9798, 983, 989, 998	0.030709	RALA, DDX11, GNAI3, ASPM, CDC42, SPAG5, PIK3C3, MAPRE3, AURKA, KIF4A, SH3GLB1, ZNF330, RNF8, KIF20A, ECT2, TXNDC9, NEK2, SEPTIN7, RAB11FIP4, RAN, ARL8B, CDCA8, KIF23, CEP55, KIF20B, RASGEF1B, VPS37B, IQGAP1, KATNB1, SCCPDH, RALB, RACGAP1, ARF6, ABRAXAS2, PLK1, CLIC4, CDK1, SHCBP1, AURKB, RCC2, IST1, PPP1CC, KATNA1, PRC1, NUP62
549	GO:0030119	AP-type membrane coat adaptor complex	GOCC	38	-0.0545204	0.712608	0.121722	0.29006	down	10717, 10947, 161, 163, 164, 23163, 26119, 26985, 57617, 65082, 8120, 8301, 8546, 9779	0.263631	AP2B1, AP3M2, PICALM, AP3B2, VPS18, GGA3, TBC1D5, AP3B1, AP4B1, VPS33A, LDLRAP1, AP1G1, AP2A2, AP3M1
543	GO:0000152	nuclear ubiquitin ligase complex	GOCC	40	-0.0545752	0.712366	0.112032	0.272315	down	11065, 143384, 1911, 51434, 57332, 580, 6045, 6047, 672, 701, 84108, 8697, 991	0.246725	BRCA1, RNF4, CDC23, PHC1, CDC20, RNF2, BARD1, CBX8, CACUL1, PCGF6, BUB1B, UBE2C, ANAPC7
435	GO:0045211	postsynaptic membrane	GOCC	97	-0.0547368	0.711651	0.0134271	0.0537084	down	1020, 10243, 11141, 1136, 1138, 1139, 1739, 1740, 1756, 22866, 22941, 23426, 2567, 2568, 2742, 2890, 2895, 2898, 2900, 2904, 375, 5728, 57451, 57554, 64506, 80059, 8301, 84896, 9093, 9228, 9229, 93664, 9455, 9568	0.0505223	LRRC7, PICALM, DLG1, CHRNA3, CADPS2, GABRP, GLRA2, DNAJA3, HOMER2, GABBR2, ATAD1, ARF1, TENM2, GRIK4, CNKSR2, DLG2, GRID2, GRIA1, GRIP1, SHANK2, GRIK2, CDK5, IL1RAPL1, CHRNA5, DLGAP1, GPHN, PTEN, CHRNA7, LRRTM4, GABRG3, DLGAP2, DMD, CPEB1, GRIN2B
334	GO:0005874	microtubule	GOCC	310	-0.0547433	0.711622	1.32239e-05	0.000132634	down	10059, 10112, 10300, 10426, 10576, 10615, 10694, 10783, 10808, 10982, 11004, 11104, 124602, 140735, 1453, 154313, 157922, 158297, 1639, 166614, 1739, 2009, 201625, 220134, 221150, 22920, 22924, 22948, 22974, 23172, 24137, 259266, 26052, 26586, 27067, 27229, 27436, 2801, 283349, 283987, 29127, 347688, 348235, 3797, 3801, 3831, 3832, 3833, 3835, 4281, 4751, 4957, 5048, 51143, 51203, 51512, 51626, 5…	0.00010873	KRIT1, PAFAH1B1, ZNF207, CUL3, STAU2, ASPM, EML1, POLB, GTSE1, DLG1, KIFAP3, SPAG5, SPAG6, KIF22, KIF3C, MAPRE3, DNM1L, AURKA, TPX2, KIF9, KIF4A, MID1, RAB11A, RAB3D, DNAH11, TRPV4, MDM1, KIF20A, NEK2, NEK6, HSPH1, KIF18A, TBCC, KLC1, TUBGCP3, TUBA4A, MTUS1, MAP1S, CAMSAP1, HAUS8, MAP7, TTLL4, CKAP2, ODF2, NUSAP1, KIF23, LRRC49, TUBGCP4, RMDN3, DYNC2LI1, KIF11, KIF20B, IQGAP1, KATNB1, KIFC3, BCAS…
420	GO:0098562	cytoplasmic side of membrane	GOCC	114	-0.0550774	0.710146	0.00707578	0.0310779	down	10160, 118426, 153090, 1739, 2185, 22821, 246, 2534, 26119, 27131, 2773, 29127, 329, 3301, 3728, 3815, 5127, 51429, 54331, 55763, 5728, 5770, 5774, 5997, 6000, 640, 7074, 7187, 7188, 7189, 7430, 7525, 7803, 83850, 8826, 9267, 9630	0.0290893	FYN, GNAI3, PTPN3, DLG1, TRAF5, DNAJA1, SNX5, EXOC1, EZR, CDK16, CYTH1, BIRC2, PTP4A1, RGS2, PTK2B, SNX9, TRAF3, BLK, DAB2IP, IQGAP1, FARP1, GNA14, TIAM1, KIT, LDLRAP1, ESYT3, RACGAP1, ALOX15, BORCS5, PTEN, JUP, TRAF6, YES1, RGS7, RASA3, GNG2, PTPN1
584	GO:0035861	site of double-strand break	GOCC	28	-0.0551909	0.709646	0.178487	0.38	down	10111, 157570, 3014, 51444, 55693, 56852, 5888, 6118, 79677, 9025	0.352167	RAD51, RAD18, RNF8, RAD50, RPA2, RNF138, SMC6, ESCO2, KDM4D, H2AFX
443	GO:0070382	exocytic vesicle	GOCC	86	-0.0566848	0.703087	0.0158929	0.060682	down	10059, 127833, 143187, 201294, 2054, 23335, 2890, 29988, 320, 3382, 51138, 5127, 51305, 51760, 54843, 57030, 5799, 5870, 5873, 6809, 6854, 7416, 81565, 81615, 8224, 83992, 8898, 9001, 94120, 9522, 9899	0.0560035	ICA1, RAB27A, CTTNBP2, SCAMP1, MTMR2, DNM1L, WDR7, UNC13D, CDK16, SYT17, SLC17A7, APBA1, STX2, SLC2A8, SYTL2, COPS4, SYT2, VTI1A, TMEM163, PTPRN2, GRIA1, SYN2, SYTL3, NDEL1, STX3, KCNK9, HAP1, RAB6A, SV2B, SYN3, VDAC1
518	GO:0031201	SNARE complex	GOCC	42	-0.0566965	0.703037	0.0909094	0.243387	down	10228, 143187, 2054, 23256, 23673, 26984, 662, 6809, 6813, 6845, 8723, 8774, 9341, 9554, 9570	0.223889	VAMP3, STXBP2, SCFD1, GOSR2, STX2, BNIP1, SNX4, STX12, SEC22A, VAMP7, NAPG, STX6, VTI1A, STX3, SEC22B
406	GO:0000781	chromosome, telomeric region	GOCC	125	-0.0571159	0.701206	0.00349437	0.0168936	down	10111, 1017, 10728, 10951, 1111, 142, 1642, 1763, 222229, 23028, 23064, 24144, 25913, 26277, 3014, 4171, 4172, 4173, 4221, 4436, 4998, 4999, 5000, 5001, 5111, 5501, 55226, 55655, 55791, 56160, 5884, 5888, 6117, 6118, 641, 675, 7013, 79577, 79677, 84321, 9025, 983, 9878	0.0156717	KDM1A, NLRP2, RAD51, THOC3, MCM2, ORC1, TOX4, TINF2, MSH2, TFIP11, MCM4, SETX, CBX1, PTGES3, MCM3, RNF8, RAD50, ORC2, ORC4, RPA2, LRIF1, CDK2, POT1, RPA1, PCNA, MEN1, CDC73, NAT10, DNA2, BRCA2, PARP1, TERF1, CHEK1, RAD17, LRWD1, SMC6, ORC5, DDB1, CDK1, NSMCE3, PPP1CC, H2AFX, BLM
452	GO:0008021	synaptic vesicle	GOCC	78	-0.0575959	0.699118	0.0195945	0.0711756	down	10059, 127833, 143187, 2054, 23335, 2890, 29988, 320, 3382, 51138, 5127, 51305, 57030, 5799, 6809, 6854, 7416, 81565, 81615, 8224, 83992, 8898, 9001, 9522, 9899	0.0649249	ICA1, CTTNBP2, SCAMP1, MTMR2, DNM1L, WDR7, CDK16, SLC17A7, APBA1, STX2, SLC2A8, COPS4, SYT2, VTI1A, TMEM163, PTPRN2, GRIA1, SYN2, NDEL1, STX3, KCNK9, HAP1, SV2B, SYN3, VDAC1
558	GO:0030286	dynein complex	GOCC	32	-0.0576705	0.698794	0.133081	0.309195	down	140735, 1639, 201625, 51143, 51164, 51626, 55567, 79659, 8632, 8701, 8723	0.282717	DNAH11, SNX4, DCTN4, DYNC2LI1, DYNC1LI1, DNAH3, DNAH12, DYNC2H1, DNAH17, DCTN1, DYNLL2
425	GO:0016323	basolateral plasma membrane	GOCC	99	-0.0577555	0.698425	0.00846716	0.0360122	down	1015, 10257, 1496, 1499, 1739, 2030, 2054, 2066, 23428, 23705, 26119, 27347, 28234, 3326, 4072, 481, 486, 51458, 54805, 5871, 65009, 6768, 7039, 7430, 8650, 9053, 9056, 9497	0.0335662	SLC4A7, CTNNA2, DLG1, CDH17, SLC7A8, EZR, HSP90AB1, NDRG4, STX2, SLCO1B3, SLC29A1, EPCAM, ABCC4, NUMB, MAP7, FXYD2, RHCG, ATP1B1, CNNM2, ST14, SLC7A7, LDLRAP1, TGFA, CTNNB1, MAP4K2, ERBB4, CADM1, STK39
601	GO:0005680	anaphase-promoting complex	GOCC	21	-0.0595094	0.690853	0.208985	0.420474	down	11065, 143384, 51434, 701, 8697, 991	0.391517	CDC23, CDC20, CACUL1, BUB1B, UBE2C, ANAPC7
414	GO:0009898	cytoplasmic side of plasma membrane	GOCC	103	-0.0599831	0.688823	0.00531433	0.0242941	down	10160, 153090, 1739, 2185, 22821, 246, 2534, 26119, 27131, 2773, 29127, 329, 3728, 3815, 5127, 51429, 54331, 55763, 5728, 5774, 5997, 6000, 640, 7074, 7187, 7188, 7189, 7430, 7525, 7803, 83850, 8826, 9267, 9630	0.0226881	FYN, GNAI3, PTPN3, DLG1, TRAF5, SNX5, EXOC1, EZR, CDK16, CYTH1, BIRC2, PTP4A1, RGS2, PTK2B, SNX9, TRAF3, BLK, DAB2IP, IQGAP1, FARP1, GNA14, TIAM1, KIT, LDLRAP1, ESYT3, RACGAP1, ALOX15, PTEN, JUP, TRAF6, YES1, RGS7, RASA3, GNG2
555	GO:0070461	SAGA-type complex	GOCC	29	-0.0612794	0.683296	0.128647	0.300177	down	117143, 27097, 51616, 55578, 6877, 6880, 79595, 8464, 9736	0.274612	SUPT20H, USP34, TAF5L, SAP130, TAF5, TADA1, TAF9B, SUPT3H, TAF9
418	GO:0005814	centriole	GOCC	87	-0.0631926	0.67522	0.00688827	0.0306551	down	10426, 10806, 11190, 116840, 118611, 121441, 134359, 152185, 158297, 284403, 4957, 55165, 55835, 56890, 585, 5901, 6790, 7153, 8100, 8481, 85302, 899, 9001, 9657	0.0288528	IFT88, OFD1, SDCCAG8, WDR62, AURKA, MDM1, CEP250, TUBGCP3, TOP2A, RAN, ODF2, CEP55, NEDD1, BBS4, CENPJ, POC5, C10orf90, SAXO1, CCNF, SPICE1, CNTROB, IQCB1, HAP1, FBF1
330	GO:0000151	ubiquitin ligase complex	GOCC	239	-0.0649183	0.668017	5.49446e-06	5.86076e-05	down	10238, 1027, 10425, 11060, 11065, 11146, 114818, 114907, 1163, 121551, 126433, 143384, 1642, 1911, 23032, 23194, 23276, 23510, 255488, 25793, 25827, 25853, 25879, 26133, 26234, 26260, 26269, 267, 27252, 2861, 3301, 4008, 51185, 51434, 51514, 51676, 54165, 5469, 55294, 55827, 55975, 56254, 56852, 571, 57332, 57563, 580, 59349, 6045, 6047, 64395, 64410, 64750, 6500, 6502, 672, 701, 7319, 7321, 7324…	4.78341e-05	BRCA1, RNF14, CUL3, DCUN1D1, CUL1, RNF4, RAD18, UBE2D1, KLHL20, USP33, UBE2A, DNAJA1, GMCL1, BRAP, CDC23, FBXO7, ASB2, TRPC4AP, RNF40, CBLL1, CUL2, SMURF2, FBXW7, KCTD10, CDKN1B, PHC1, RNF8, SKP1, CRBN, KLHL18, KLHL12, CDC20, FBXL5, KLHL29, RNF2, KLHL7, MED20, MED1, TRAF7, FBH1, LMO7, DCAF7, RNF144B, DCUN1D5, BARD1, CUL4A, CBX8, DCAF6, DTL, KLHL8, SKP2, FBXO25, BTBD11, CACUL1, MED21, FBXL2, OTULI…
507	GO:0043596	nuclear replication fork	GOCC	35	-0.065875	0.664057	0.0726464	0.203439	down	4172, 5111, 51659, 54107, 5422, 54962, 6117, 6118, 8318, 9031	0.188626	BAZ1B, TIPIN, CDC45, POLA1, MCM3, RPA2, GINS2, RPA1, PCNA, POLE3
372	GO:0031461	cullin-RING ubiquitin ligase complex	GOCC	131	-0.0665439	0.661302	0.000501547	0.0032099	down	10238, 1027, 11065, 11146, 114818, 114907, 1163, 121551, 126433, 143384, 1642, 23194, 23276, 23510, 25793, 25827, 25853, 25879, 26133, 26234, 26260, 27252, 51185, 51434, 51514, 51676, 55294, 55827, 55975, 571, 57563, 59349, 64410, 6500, 6502, 701, 8065, 83892, 8451, 8452, 8453, 8454, 84893, 8697, 8945, 899, 991	0.00268298	CUL3, CUL1, KLHL20, CDC23, FBXO7, ASB2, TRPC4AP, CUL2, FBXW7, KCTD10, CDKN1B, SKP1, CRBN, KLHL18, KLHL12, CDC20, FBXL5, KLHL29, KLHL7, FBH1, DCAF7, CUL4A, DCAF6, DTL, KLHL8, SKP2, FBXO25, BTBD11, CACUL1, FBXL2, BACH1, FBXO32, BUB1B, FBXO27, CCNF, DCAF13, BTRC, CUL5, DDB1, CKS1B, GLMN, UBE2C, KCTD2, FBXL7, KLHL25, ANAPC7, DCAF12
538	GO:0090568	nuclear transcriptional repressor complex	GOCC	27	-0.0670139	0.659374	0.108409	0.268822	down	11218, 138151, 1457, 26060, 54815, 55198, 57459, 57597, 5928, 5931, 91750	0.244333	DDX20, CSNK2A1, RBBP7, APPL2, GATAD2B, NACC2, APPL1, RBBP4, GATAD2A, LIN52, BAHCC1
477	GO:0032838	cell projection cytoplasm	GOCC	43	-0.0674661	0.657523	0.0416368	0.131981	down	100, 10947, 127933, 24137, 26985, 2898, 3091, 4747, 5048, 5594, 6792, 7345, 8120, 81565, 8546, 9001	0.121623	PAFAH1B1, CDKL5, AP3M2, KIF4A, MAPK1, HIF1A, AP3B2, AP3B1, UHMK1, UCHL1, GRIK2, NDEL1, HAP1, AP3M1, ADA, NEFL
411	GO:0016605	PML body	GOCC	81	-0.0681545	0.654716	0.0048681	0.0227178	down	1025, 10891, 148523, 1613, 219988, 27252, 406, 51567, 51588, 55743, 5598, 56478, 5728, 57451, 5888, 6047, 6049, 6117, 6118, 6304, 641, 6497, 7181, 7329, 7874, 79677, 8554, 8878, 9063, 94241	0.0214004	PIAS1, RAD51, RNF4, CHFR, KLHL20, PIAS2, UBE2I, PIAS4, PPARGC1A, TDP2, RPA2, NR2C1, RNF6, RPA1, ARNTL, CDK9, TENM2, SKI, CIART, SQSTM1, SMC6, TP53INP1, MAPK7, PATL1, DAPK3, PTEN, SATB1, EIF4ENIF1, USP7, BLM
380	GO:0000776	kinetochore	GOCC	118	-0.0684681	0.653441	0.00066575	0.00395915	down	1058, 10615, 11004, 11130, 151246, 1639, 220134, 221150, 222229, 25936, 25942, 348235, 3835, 4085, 4751, 4999, 5048, 51143, 5347, 54908, 5501, 55055, 55355, 55746, 5663, 5664, 57122, 57405, 6396, 64946, 699, 701, 7756, 79902, 79980, 81565, 81929, 81930, 8243, 83540, 8379, 891, 91272, 9184, 9212, 989	0.00335901	MAD1L1, PAFAH1B1, ZNF207, SPDL1, NUP133, SMC1A, SPAG5, KIF22, PSEN1, SEH1L, NUP107, CENPA, ORC2, NEK2, NSL1, KIF18A, SEPTIN7, ZWINT, HJURP, NUP85, CCNB1, KIF2C, NUF2, PSEN2, DYNC1LI1, BOD1, DSN1, SPC25, CENPH, BUB3, SKA1, BUB1B, SEC13, LRWD1, SGO2, MAD2L1, SKA3, NDEL1, PLK1, SIN3A, BUB1, ZWILCH, AURKB, SKA2, PPP1CC, DCTN1
520	GO:0005720	nuclear heterochromatin	GOCC	28	-0.0690365	0.651137	0.0919353	0.244192	down	10951, 115426, 146956, 157570, 1788, 29128, 6045, 6304	0.224282	CBX1, DNMT3A, RNF2, UHRF2, EME1, ESCO2, SATB1, UHRF1
545	GO:0030131	clathrin adaptor complex	GOCC	24	-0.0697434	0.648283	0.114731	0.277336	down	10717, 10947, 161, 163, 164, 23163, 26119, 26985, 8301, 8546, 9779	0.25094	AP2B1, AP3M2, PICALM, GGA3, TBC1D5, AP3B1, AP4B1, LDLRAP1, AP1G1, AP2A2, AP3M1
501	GO:0045334	clathrin-coated endocytic vesicle	GOCC	32	-0.0703363	0.645899	0.0663714	0.190605	down	161, 163, 164, 2209, 22905, 26119, 4643, 4646, 55788, 6456, 8301, 9779	0.17541	AP2B1, EPN2, PICALM, SH3GL2, TBC1D5, FCGR1A, MYO1E, LDLRAP1, AP1G1, LMBRD1, AP2A2, MYO6
386	GO:0000779	condensed chromosome, centromeric region	GOCC	101	-0.070568	0.644969	0.00114517	0.00646686	down	1058, 10615, 11004, 11130, 151246, 220134, 221150, 222229, 25936, 348235, 4085, 4751, 4999, 51143, 5347, 54908, 5501, 55055, 55355, 55746, 57122, 57405, 64946, 6790, 699, 701, 7756, 79902, 79980, 81565, 81929, 8243, 83540, 8379, 891, 91272, 9184, 9212, 989	0.00552671	MAD1L1, ZNF207, SPDL1, NUP133, SMC1A, SPAG5, SEH1L, AURKA, NUP107, CENPA, ORC2, NEK2, NSL1, SEPTIN7, ZWINT, HJURP, NUP85, CCNB1, KIF2C, NUF2, DYNC1LI1, BOD1, DSN1, SPC25, CENPH, BUB3, SKA1, BUB1B, LRWD1, SGO2, MAD2L1, SKA3, NDEL1, PLK1, BUB1, ZWILCH, AURKB, SKA2, PPP1CC
394	GO:0000777	condensed chromosome kinetochore	GOCC	92	-0.0721714	0.638575	0.00147718	0.00781624	down	1058, 10615, 11004, 11130, 151246, 220134, 221150, 222229, 25936, 348235, 4085, 4751, 4999, 51143, 5347, 54908, 5501, 55055, 55355, 55746, 57122, 57405, 64946, 699, 701, 7756, 79902, 79980, 81565, 81929, 8243, 83540, 8379, 891, 91272, 9184, 989	0.00683194	MAD1L1, ZNF207, SPDL1, NUP133, SMC1A, SPAG5, SEH1L, NUP107, CENPA, ORC2, NEK2, NSL1, SEPTIN7, ZWINT, HJURP, NUP85, CCNB1, KIF2C, NUF2, DYNC1LI1, BOD1, DSN1, SPC25, CENPH, BUB3, SKA1, BUB1B, LRWD1, SGO2, MAD2L1, SKA3, NDEL1, PLK1, BUB1, ZWILCH, SKA2, PPP1CC
309	GO:0098687	chromosomal region	GOCC	285	-0.0736368	0.632786	2.03961e-08	3.26338e-07	down	10111, 1017, 1058, 10615, 10728, 10951, 11004, 1111, 11130, 142, 151246, 157570, 1639, 1642, 1763, 1786, 1788, 220134, 221150, 222229, 23028, 23063, 23064, 23244, 24144, 25913, 25936, 25942, 25983, 26277, 27309, 3014, 348235, 3835, 401541, 4085, 4171, 4172, 4173, 4221, 4288, 4436, 4751, 4998, 4999, 5000, 5001, 5048, 50511, 5111, 51143, 5347, 54908, 5501, 55055, 55124, 55143, 5515, 55166, 55226, 5…	2.58739e-07	MAD1L1, KDM1A, PAFAH1B1, BAZ1B, ZNF207, NLRP2, CENPQ, SPDL1, RAD51, THOC3, WAPL, PPP2R5A, NUP133, SMC1A, MCM2, SPAG5, KIF22, PSEN1, SEH1L, ORC1, AURKA, TOX4, TINF2, MSH2, TFIP11, MCM4, SETX, SMC3, CBX1, ZNF330, PTGES3, NUP107, MCM3, RNF8, RAD50, PPP2CA, CENPA, ORC2, ORC4, NEK2, NSL1, RPA2, DNMT3A, KIF18A, PDS5A, LRIF1, SEPTIN7, ZWINT, CDK2, HJURP, NUP85, POT1, NGDN, DNMT1, RPA1, PCNA, MEN1, CCNB1…
332	GO:0000793	condensed chromosome	GOCC	175	-0.0740199	0.631281	8.03121e-06	8.30303e-05	down	10051, 10111, 1017, 10388, 1058, 10592, 10615, 11004, 1111, 11130, 120, 151246, 2177, 220134, 221150, 222229, 22920, 23063, 23397, 25936, 285498, 3014, 348235, 4085, 4288, 4751, 4999, 50511, 51143, 5347, 5378, 54908, 5501, 55055, 55355, 55746, 56160, 57122, 57405, 5810, 5888, 5889, 641, 64151, 64946, 672, 675, 6790, 699, 701, 7153, 7329, 7756, 79677, 79902, 79980, 81565, 81929, 8243, 83540, 8379,…	6.72803e-05	MAD1L1, BAZ1B, ZNF207, BRCA1, SPDL1, RAD51, WAPL, PMS1, NUP133, SMC1A, KIFAP3, SPAG5, SEH1L, AURKA, UBE2I, SMC3, RAD51C, NCAPG, NUP107, RAD1, RAD50, SMC4, CENPA, ORC2, NEK2, NSL1, NCAPH, SEPTIN7, ZWINT, CDK2, HJURP, NUP85, TOP2A, CCNB1, SMC2, SYCP3, BRCA2, KIF2C, NUF2, FANCD2, DYNC1LI1, BOD1, ADD3, MKI67, CHEK1, DSN1, SPC25, CENPH, BUB3, SKA1, BUB1B, LRWD1, SMC6, SGO2, MAD2L1, SKA3, NDEL1, PLK1, …
464	GO:0030118	clathrin coat	GOCC	40	-0.074282	0.630253	0.0299615	0.101631	down	10717, 10947, 161, 163, 164, 22905, 23163, 25977, 26119, 26985, 58513, 65082, 80115, 8301, 83988, 8546, 9779	0.0939144	AP2B1, AP3M2, EPN2, PICALM, NECAP1, NCALD, GGA3, EPS15L1, BAIAP2L2, TBC1D5, AP3B1, AP4B1, VPS33A, LDLRAP1, AP1G1, AP2A2, AP3M1
453	GO:0019005	SCF ubiquitin ligase complex	GOCC	44	-0.0751177	0.626988	0.0213149	0.0770088	down	114907, 1163, 121551, 126433, 23194, 25793, 25827, 26234, 26260, 55294, 6500, 6502, 8454, 84893, 8945, 899	0.0701024	CUL1, FBXO7, FBXW7, SKP1, FBXL5, FBH1, SKP2, FBXO25, BTBD11, FBXL2, FBXO32, FBXO27, CCNF, BTRC, CKS1B, FBXL7
519	GO:0034451	centriolar satellite	GOCC	21	-0.0793264	0.610802	0.09127	0.243387	down	10464, 10615, 10806, 27241, 585, 8481	0.223889	OFD1, SDCCAG8, SPAG5, PIBF1, BBS9, BBS4
308	GO:0005819	spindle	GOCC	248	-0.080362	0.606884	9.3784e-09	1.53714e-07	down	10112, 10300, 10426, 10615, 10783, 10951, 11083, 11104, 121441, 1453, 1499, 152185, 1639, 1663, 1894, 2009, 220134, 221150, 22920, 22974, 23172, 23384, 23636, 24137, 259266, 26586, 27229, 2801, 284403, 29127, 292, 29899, 348235, 3832, 3833, 3835, 4085, 4281, 440145, 4751, 4957, 5048, 51143, 51203, 5347, 5423, 54908, 55143, 5515, 55171, 55177, 55201, 55207, 55689, 55920, 5594, 5604, 56776, 56992, …	1.22471e-07	MAD1L1, SLC25A5, PAFAH1B1, ZNF207, DDX11, CUL3, SPDL1, ASPM, EML1, POLB, CDC42, WDR62, KIFAP3, SPAG5, KIF22, AURKA, TPX2, KIF4A, CDC6, SPECC1L, MAPK1, VRK1, DIDO1, MID1, RAB11A, SMC3, CBX1, PTP4A1, TTK, KIF20A, PPP2CA, TBCCD1, ECT2, CDC20, NEK2, NEK6, KIF18A, GPSM2, SEPTIN7, NUP85, FAM110A, TUBGCP3, DLGAP5, AUNIP, MTUS1, MAP1S, CEP85, RAB11FIP4, HAUS8, CCNB1, ARL8B, CDCA8, ESPL1, CKAP2, ODF2, NUS…
474	GO:1904115	axon cytoplasm	GOCC	30	-0.0825875	0.598548	0.0352836	0.114544	down	10947, 24137, 26985, 3091, 4747, 5048, 7345, 8120, 81565, 8546, 9001	0.10514	PAFAH1B1, AP3M2, KIF4A, HIF1A, AP3B2, AP3B1, UCHL1, NDEL1, HAP1, AP3M1, NEFL
327	GO:0000775	chromosome, centromeric region	GOCC	167	-0.0825912	0.598534	1.0074e-06	1.12829e-05	down	1058, 10615, 10951, 11004, 11130, 151246, 157570, 1639, 1786, 1788, 220134, 221150, 222229, 23063, 23244, 25936, 25942, 25983, 27309, 348235, 3835, 401541, 4085, 4288, 4751, 4999, 5048, 50511, 51143, 5347, 54908, 5501, 55055, 55143, 5515, 55166, 5525, 55355, 55746, 55920, 5663, 5664, 57122, 57405, 6396, 64946, 6790, 699, 701, 7756, 79723, 79902, 79980, 81565, 81929, 81930, 8243, 83540, 8379, 891,…	9.31849e-06	MAD1L1, PAFAH1B1, BAZ1B, ZNF207, CENPQ, SPDL1, WAPL, PPP2R5A, NUP133, SMC1A, SPAG5, KIF22, PSEN1, SEH1L, AURKA, SMC3, CBX1, ZNF330, NUP107, PPP2CA, CENPA, ORC2, NEK2, NSL1, DNMT3A, KIF18A, PDS5A, SEPTIN7, ZWINT, HJURP, NUP85, NGDN, DNMT1, CCNB1, CDCA8, SYCP3, KIF2C, NUF2, PSEN2, DYNC1LI1, BOD1, MKI67, DSN1, SPC25, SUV39H2, CENPH, BUB3, SKA1, BUB1B, SEC13, LRWD1, SGO2, MAD2L1, SKA3, NDEL1, PLK1, S…
483	GO:0016328	lateral plasma membrane	GOCC	25	-0.0856032	0.587434	0.0456394	0.141335	down	1499, 1739, 1756, 3728, 4072, 8826	0.129897	DLG1, EPCAM, IQGAP1, CTNNB1, JUP, DMD
415	GO:0072686	mitotic spindle	GOCC	46	-0.0873219	0.581194	0.00572395	0.0259898	down	10615, 1894, 2009, 259266, 2801, 29127, 29899, 3835, 4085, 55689, 55920, 5594, 6790, 79884, 81930, 8379, 9493, 9585, 9700, 983, 998	0.0242041	MAD1L1, ASPM, EML1, CDC42, SPAG5, KIF22, AURKA, MAPK1, ECT2, KIF18A, GPSM2, ESPL1, KIF23, KIF20B, RACGAP1, YEATS2, MAD2L1, MAP9, GOLGA2, CDK1, RCC2
362	GO:0005643	nuclear pore	GOCC	72	-0.0911464	0.567543	0.00030586	0.00216356	down	10762, 11260, 129401, 23039, 23633, 23636, 2733, 3838, 3839, 3843, 402569, 4085, 4927, 53371, 55706, 55746, 57122, 5901, 6396, 64901, 79902, 8021, 81929, 8379, 8480, 9688, 9818, 9972	0.0018603	MAD1L1, KPNA6, NDC1, IPO5, NUP133, SEH1L, NUP50, RAE1, KPNA3, NUP93, NUP88, NUP107, GLE1, NUP153, NUP85, NUP214, XPO7, RAN, NUP54, NUP58, SEC13, NUP35, MAD2L1, KPNA2, XPOT, KPNA7, RANBP17, NUP62
328	GO:0005875	microtubule associated complex	GOCC	116	-0.0941961	0.556887	2.33116e-06	2.5681e-05	down	10112, 10300, 11004, 118426, 124602, 140735, 1639, 2009, 201625, 22920, 24137, 3797, 3801, 3831, 3832, 3833, 3835, 4281, 5048, 51143, 51164, 51626, 55083, 55143, 55172, 55567, 56992, 57698, 64147, 6780, 6790, 79659, 81565, 81930, 8632, 8701, 8723, 9053, 9212, 93323, 9493, 9585	2.11232e-05	PAFAH1B1, EML1, KIFAP3, KIF22, KIF3C, AURKA, KIF9, KIF4A, MID1, DNAH11, KIF20A, SNX4, KIF18A, STAU1, KLC1, HAUS8, DCTN4, CDCA8, MAP7, KIF23, DYNC2LI1, KIF11, KIF20B, KATNB1, KIFC3, KIF2C, DYNC1LI1, DNAH3, KIF26B, KIF15, DNAAF2, BORCS5, NDEL1, DNAH12, AURKB, SHTN1, DYNC2H1, DNAH17, KIF19, DCTN1, KIFC1, DYNLL2
381	GO:0005657	replication fork	GOCC	57	-0.0957087	0.551677	0.000680429	0.00401095	down	1111, 1786, 29128, 3014, 4172, 5111, 51659, 54107, 5422, 54962, 5558, 56852, 5889, 5890, 5983, 5985, 6117, 6118, 7516, 8318, 9031	0.0033945	BAZ1B, RAD18, TIPIN, CDC45, POLA1, RAD51C, RFC5, MCM3, RPA2, DNMT1, GINS2, RPA1, PCNA, RFC3, PRIM2, POLE3, CHEK1, RAD51B, H2AFX, XRCC2, UHRF1
457	GO:0030894	replisome	GOCC	25	-0.095895	0.551039	0.0234848	0.0826434	down	4172, 5111, 54107, 5422, 5558, 6117, 6118	0.075031	POLA1, MCM3, RPA2, RPA1, PCNA, PRIM2, POLE3
358	GO:0000794	condensed nuclear chromosome	GOCC	68	-0.0961848	0.550047	0.000195107	0.00144079	down	10111, 10388, 1058, 1111, 120, 22920, 23063, 285498, 3014, 4751, 50511, 5347, 5378, 5810, 5888, 5889, 641, 672, 675, 6790, 699, 701, 7329, 79980, 8243, 891, 9126, 9212	0.00125547	BRCA1, RAD51, WAPL, PMS1, SMC1A, KIFAP3, AURKA, UBE2I, SMC3, RAD51C, RAD1, RAD50, CENPA, NEK2, CCNB1, SYCP3, BRCA2, ADD3, CHEK1, DSN1, BUB1B, PLK1, BUB1, RNF212, AURKB, H2AFX, SYCP2, BLM
460	GO:0080008	Cul4-RING E3 ubiquitin ligase complex	GOCC	24	-0.09646	0.549107	0.0254362	0.0885655	down	10238, 1027, 11146, 1642, 25853, 25879, 26133, 51185, 51514, 55827, 8451	0.0806692	TRPC4AP, CDKN1B, CRBN, DCAF7, CUL4A, DCAF6, DTL, DCAF13, DDB1, GLMN, DCAF12
456	GO:0000795	synaptonemal complex	GOCC	22	-0.101418	0.532446	0.0234894	0.0826434	down	10388, 23063, 285498, 50511, 5347, 5378, 5888, 641, 672, 675, 7329, 9126	0.075031	BRCA1, RAD51, WAPL, PMS1, UBE2I, SMC3, SYCP3, BRCA2, PLK1, RNF212, SYCP2, BLM
448	GO:0030904	retromer complex	GOCC	20	-0.109546	0.50622	0.0181576	0.0674137	down	1639, 27131, 55737, 58533, 6643, 81609, 8724, 9559, 9779	0.062015	VPS35, SNX5, SNX3, VPS26A, SNX6, TBC1D5, SNX27, DCTN1, SNX2
361	GO:0005871	kinesin complex	GOCC	47	-0.111413	0.500379	0.000238011	0.00170152	down	10112, 11004, 118426, 124602, 22920, 24137, 3797, 3801, 3831, 3832, 3833, 3835, 5048, 55083, 56992, 64147, 81565, 81930, 9493, 9585	0.00146773	PAFAH1B1, KIFAP3, KIF22, KIF3C, KIF9, KIF4A, KIF20A, KIF18A, KLC1, KIF23, KIF11, KIF20B, KIFC3, KIF2C, KIF26B, KIF15, BORCS5, NDEL1, KIF19, KIFC1
439	GO:0008328	ionotropic glutamate receptor complex	GOCC	20	-0.112373	0.497404	0.0149202	0.0577505	down	1739, 1740, 2185, 22908, 22941, 2890, 2895, 2898, 2900, 2904	0.0534808	DLG1, PTK2B, GRIK4, DLG2, GRID2, GRIA1, SHANK2, GRIK2, SACM1L, GRIN2B
441	GO:0098878	neurotransmitter receptor complex	GOCC	20	-0.112373	0.497404	0.0149202	0.0577505	down	1739, 1740, 2185, 22908, 22941, 2890, 2895, 2898, 2900, 2904	0.0534808	DLG1, PTK2B, GRIK4, DLG2, GRID2, GRIA1, SHANK2, GRIK2, SACM1L, GRIN2B
353	GO:0005876	spindle microtubule	GOCC	49	-0.113379	0.494302	0.000129007	0.00100805	down	10426, 10615, 1453, 220134, 221150, 22920, 24137, 348235, 3832, 5048, 51203, 5347, 5423, 6790, 79718, 79884, 801, 805, 81930, 8452, 8766, 9055, 9212, 983	0.000867864	PAFAH1B1, CUL3, POLB, KIFAP3, SPAG5, AURKA, KIF4A, RAB11A, KIF18A, TUBGCP3, NUSAP1, KIF11, CSNK1D, CALM2, SKA1, MAP9, SKA3, PLK1, CDK1, TBL1XR1, AURKB, SKA2, CALM1, PRC1
413	GO:0000803	sex chromosome	GOCC	25	-0.115111	0.48901	0.00514853	0.0236974	down	1017, 157570, 1788, 3014, 329, 6045, 63946, 7319, 79677, 84944	0.0221937	UBE2A, BIRC2, DNMT3A, RNF2, CDK2, DMRTC2, MAEL, SMC6, ESCO2, H2AFX
304	GO:0000922	spindle pole	GOCC	111	-0.120002	0.47437	1.20446e-09	2.18757e-08	down	10300, 10426, 10615, 10783, 11104, 121441, 1499, 1639, 1663, 2009, 22974, 23172, 23636, 259266, 26586, 27229, 2801, 284403, 29899, 3832, 4085, 4751, 4957, 51143, 5347, 54908, 5515, 55171, 55177, 5604, 64793, 6790, 79000, 79980, 801, 805, 83541, 8379, 8452, 85302, 8766, 891, 9055, 9126, 9212, 93323, 9585, 9787, 990, 991	1.78261e-08	MAD1L1, DDX11, CUL3, SPDL1, ASPM, EML1, WDR62, SPAG5, AURKA, TPX2, CDC6, RAB11A, SMC3, PPP2CA, TBCCD1, CDC20, NEK2, NEK6, GPSM2, FAM110A, TUBGCP3, DLGAP5, AUNIP, CEP85, HAUS8, CCNB1, CKAP2, ODF2, TUBGCP4, RMDN3, KIF11, KIF20B, NEDD1, KATNB1, CALM2, DYNC1LI1, DSN1, MAD2L1, ABRAXAS2, PLK1, GOLGA2, CTNNB1, MAP2K1, AURKB, KATNA1, FBF1, CALM1, PRC1, DCTN1, NUP62
341	GO:0051233	spindle midzone	GOCC	25	-0.159938	0.37011	2.45305e-05	0.000222764	down	2009, 29127, 5347, 55143, 55207, 55920, 6790, 701, 79884, 81930, 9212, 9585, 990, 998	0.000181526	EML1, CDC42, AURKA, CDC6, KIF18A, ARL8B, CDCA8, KIF20B, BUB1B, RACGAP1, MAP9, PLK1, AURKB, RCC2

## Sheet: GOMF
	Id	Name	ConceptType	#Genes	Coeff	OddsRatio	P-Value	FDR	Direction	SigGenes	FDR2	SigGenes_external_name
940	GO:0003735	structural constituent of ribosome	GOMF	185	0.141165	2.40436	3.41577e-69	2.97514e-66	up	11224, 123096, 23521, 25873, 28973, 293, 3921, 4736, 51021, 51081, 51258, 51264, 51312, 51373, 51650, 54460, 54948, 6122, 6124, 6125, 6128, 6129, 6130, 6132, 6133, 6134, 6135, 6136, 6137, 6138, 6139, 6141, 6142, 6143, 6144, 6146, 6147, 6152, 6154, 6155, 6156, 6157, 6158, 6159, 6160, 6161, 6164, 6165, 6166, 6167, 6168, 6169, 6170, 6171, 6173, 6175, 6176, 6181, 6182, 6187, 6188, 6189, 6191, 6193, 6…	1.82061e-66	RPS20, MRPL43, MRPS24, RPL18, RPL31, RPS5, RPL6, RPLP0, MRPS33, RPL3, RPS16, RPS19, RPL18A, RPL28, RPL19, SLC25A11, MRPL27, RPL34, RPS13, MRPL51, RPS12, RPL24, RPS15, RPL22, RPL21, RPL5, RPS10, MRPS7, RPL23, RPL36, RPL27, RPS15A, RPL35, RPS6, RPLP1, RPS24, RPS2, RPS11, RPL13A, RPL11, RPS8, MRPL24, RPS27A, RPL32, RPS3A, RPL37, RPL10, SLC25A37, RPL7, RPL7A, RPS3, RPL30, RPL8, RPL26, RPL29, RPL9, RP…
942	GO:0019843	rRNA binding	GOMF	54	0.129508	2.23634	3.29187e-23	9.55739e-21	up	10436, 1153, 284119, 51081, 51119, 51373, 54948, 6122, 6125, 6132, 6133, 6135, 6136, 6143, 6147, 6167, 6175, 6176, 6181, 6188, 6191, 6193, 6203, 6205, 6207, 6222, 64963, 65003, 9349	5.84855e-21	RPS5, RPLP0, CIRBP, RPL3, RPL19, RPS13, RPL5, MRPS7, RPL23, SBDS, EMG1, RPLP1, RPS11, RPL11, RPL37, RPS3, RPL8, RPL9, MRPL16, RPS9, MRPL11, CAVIN1, RPLP2, MRPS11, RPL12, RPS4X, RPL23A, RPS18, MRPS17
960	GO:0050840	extracellular matrix binding	GOMF	25	0.120832	2.11896	3.053e-10	1.26627e-08	up	1634, 3491, 3688, 3921, 3956, 3958, 4059, 6678, 7057, 8404	3.2545e-08	DCN, LGALS1, SPARC, LGALS3, THBS1, CCN1, ITGB1, SPARCL1, RPSA, BCAM
968	GO:0005201	extracellular matrix structural constituent	GOMF	20	0.117368	2.07383	6.34046e-08	1.90432e-06	up	1277, 1278, 1284, 1289, 2192, 3915, 4060, 4256, 5549	2.81622e-06	FBLN1, COL1A1, MGP, COL5A1, COL4A2, LAMC1, LUM, COL1A2, PRELP
969	GO:0004601	peroxidase activity	GOMF	21	0.113843	2.02889	1.33417e-07	3.87353e-06	up	10549, 25824, 2878, 2879, 2946, 373156, 4259, 5052, 7001, 9588	5.47009e-06	PRDX1, PRDX6, PRDX4, PRDX5, MGST3, GPX4, PRDX2, GSTK1, GPX3, GSTM2
985	GO:0050699	WW domain binding	GOMF	20	0.102742	1.89364	1.25215e-05	0.000237092	up	23559, 51186, 79921, 85012, 90843, 9338, 9516	0.000266958	TCEAL4, TCEAL1, TCEAL8, TCEAL9, LITAF, TCEAL3, WBP1
977	GO:0016684	oxidoreductase activity, acting on peroxide as acceptor	GOMF	24	0.102303	1.88848	2.16606e-06	4.96483e-05	up	10549, 11315, 25824, 2878, 2879, 2946, 373156, 4259, 5052, 7001, 9588	6.41393e-05	PARK7, PRDX1, PRDX6, PRDX4, PRDX5, MGST3, GPX4, PRDX2, GSTK1, GPX3, GSTM2
943	GO:0019838	growth factor binding	GOMF	73	0.101865	1.88334	2.67789e-15	5.8311e-13	up	10952, 114990, 1277, 1278, 1289, 1291, 1843, 2734, 3482, 3485, 3487, 3488, 3489, 3490, 3491, 3572, 3643, 5159, 5654, 6187, 6223, 7049, 7057, 8425, 8828	3.56829e-13	TGFBR3, LTBP4, GLG1, RPS19, SEC61B, COL1A1, PDGFRB, IGFBP2, IGFBP5, NRP2, DUSP1, COL5A1, IL6ST, THBS1, RPS2, IGFBP4, COL6A1, CCN1, IGFBP7, COL1A2, HTRA1, IGFBP6, VASN, INSR, IGF2R
941	GO:0005198	structural molecule activity	GOMF	446	0.101456	1.87857	2.75762e-54	1.20095e-51	up	10109, 10142, 10174, 10398, 10399, 11224, 11258, 123096, 126393, 1277, 1278, 1284, 1289, 140465, 203068, 2192, 23521, 25873, 286257, 28973, 293, 3856, 3858, 3908, 3911, 3915, 3921, 4000, 4060, 4256, 4637, 4736, 4926, 5010, 51021, 51081, 51258, 51264, 51312, 51373, 51650, 5339, 54460, 54948, 55004, 5549, 60, 6122, 6124, 6125, 6128, 6129, 6130, 6132, 6133, 6134, 6135, 6136, 6137, 6138, 6139, 6141, …	7.34907e-52	HSPB6, RPS20, CLDN11, VIM, MRPL43, MRPS24, RPL18, SLC9A3R2, RPL31, ACTB, FBLN1, RPS5, RPL6, RPLP0, MRPS33, MYL6, RPL3, MYL9, RPS16, RPS19, RPL18A, CAV1, RPL28, RPL19, SLC25A11, COL1A1, MRPL27, RPL34, RPS13, MGP, MRPL51, RPS12, RPL24, RPS15, SPTBN1, RPL22, SORBS3, RPL21, RPL5, RPS10, AHNAK, MRPS7, RPL23, AKAP9, RPL36, COL5A1, LAMA5, RPL27, RPS15A, COL4A2, LAMC1, RPL35, TLN1, DCTN3, RPS6, NUMA1, RP…
966	GO:0005518	collagen binding	GOMF	35	0.101055	1.87389	2.66284e-08	8.59011e-07	up	114897, 1514, 1634, 1842, 3688, 4060, 5479, 6678, 7057, 780, 8404, 871	1.41929e-06	DCN, ECM2, SPARC, CTSL, THBS1, LUM, SERPINH1, ITGB1, SPARCL1, PPIB, C1QTNF1, DDR1
990	GO:0008307	structural constituent of muscle	GOMF	24	0.0952218	1.80718	2.40508e-05	0.000402851	up	10398, 140465, 4637, 5339, 7169, 7171	0.000457824	MYL6, MYL9, TPM4, PLEC, MYL6B, TPM2
999	GO:0003823	antigen binding	GOMF	26	0.087663	1.72425	0.000117206	0.00170144	up	10417, 2217, 3105, 3106, 3107, 3133, 7106, 972, 975	0.00178488	CD74, FCGRT, CD81, SPON2, HLA-C, HLA-E, TSPAN4, HLA-B
998	GO:0016504	peptidase activator activity	GOMF	29	0.0849683	1.69561	0.000109628	0.0016184	up	10399, 2192, 27018, 351, 5720, 5721, 857	0.00171858	FBLN1, PSME1, PSME2, CAV1, APP, BEX3, RACK1
1017	GO:0001540	beta-amyloid binding	GOMF	22	0.0845834	1.69156	0.000785985	0.00877684	up	1471, 348, 6653, 9445, 9452, 972	0.00872771	CD74, ITM2A, CST3, APOE, ITM2B, SORL1
1025	GO:0004129	cytochrome-c oxidase activity	GOMF	21	0.0835971	1.68123	0.0012698	0.012427	up	1327, 1329, 1337, 1345, 1347, 1349, 1351, 4697	0.0116691	COX6A1, COX7A2, COX4I1, COX7B, COX5B, COX6C, COX8A, NDUFA4
1026	GO:0015002	heme-copper terminal oxidase activity	GOMF	21	0.0835971	1.68123	0.0012698	0.012427	up	1327, 1329, 1337, 1345, 1347, 1349, 1351, 4697	0.0116691	COX6A1, COX7A2, COX4I1, COX7B, COX5B, COX6C, COX8A, NDUFA4
1027	GO:0016676	oxidoreductase activity, acting on a heme group of donors, oxygen as acceptor	GOMF	21	0.0835971	1.68123	0.0012698	0.012427	up	1327, 1329, 1337, 1345, 1347, 1349, 1351, 4697	0.0116691	COX6A1, COX7A2, COX4I1, COX7B, COX5B, COX6C, COX8A, NDUFA4
979	GO:0016209	antioxidant activity	GOMF	45	0.0827799	1.67271	4.41291e-06	9.60911e-05	up	10549, 11315, 25824, 2878, 2879, 2946, 348, 373156, 4259, 5052, 7001, 9446, 9588, 9973	0.000123794	PARK7, PRDX1, PRDX6, PRDX4, PRDX5, APOE, MGST3, GSTO1, GPX4, PRDX2, CCS, GSTK1, GPX3, GSTM2
994	GO:0003954	NADH dehydrogenase activity	GOMF	38	0.0789688	1.63356	8.16655e-05	0.00124791	up	4697, 4710, 4713, 4714, 4715, 4716, 4724, 4725, 4729, 51079	0.00131902	NDUFB4, NDUFB7, NDUFB10, NDUFB9, NDUFS4, NDUFB8, NDUFS5, NDUFV2, NDUFA13, NDUFA4
995	GO:0008137	NADH dehydrogenase (ubiquinone) activity	GOMF	38	0.0789688	1.63356	8.16655e-05	0.00124791	up	4697, 4710, 4713, 4714, 4715, 4716, 4724, 4725, 4729, 51079	0.00131902	NDUFB4, NDUFB7, NDUFB10, NDUFB9, NDUFS4, NDUFB8, NDUFS5, NDUFV2, NDUFA13, NDUFA4
996	GO:0050136	NADH dehydrogenase (quinone) activity	GOMF	38	0.0789688	1.63356	8.16655e-05	0.00124791	up	4697, 4710, 4713, 4714, 4715, 4716, 4724, 4725, 4729, 51079	0.00131902	NDUFB4, NDUFB7, NDUFB10, NDUFB9, NDUFS4, NDUFB8, NDUFS5, NDUFV2, NDUFA13, NDUFA4
976	GO:0008201	heparin binding	GOMF	59	0.0779916	1.62367	1.81354e-06	4.26917e-05	up	1289, 1842, 2331, 348, 3491, 351, 4192, 5270, 5549, 56925, 6146, 6159, 64094, 7049, 7057, 8828, 9510	5.68598e-05	TGFBR3, LXN, ECM2, MDK, SMOC2, RPL22, NRP2, FMOD, APOE, COL5A1, SERPINE2, THBS1, APP, CCN1, ADAMTS1, RPL29, PRELP
973	GO:0061135	endopeptidase regulator activity	GOMF	69	0.0778093	1.62183	3.02558e-07	7.75083e-06	up	124857, 1293, 1471, 25824, 2621, 351, 5037, 5270, 56925, 5720, 5721, 684, 7076, 7077, 7078, 710, 718, 721, 871	1.0079e-05	TIMP2, LXN, PEBP1, PSME1, TIMP3, PSME2, CST3, TIMP1, C3, PRDX5, BST2, SERPINE2, APP, SERPING1, SERPINH1, COL6A3, WFIKKN2, GAS6, C4B
972	GO:0005539	glycosaminoglycan binding	GOMF	74	0.0761121	1.60481	3.00331e-07	7.75083e-06	up	1289, 1634, 1809, 1842, 2331, 348, 3491, 351, 4192, 5270, 5549, 56925, 6146, 6159, 64094, 7049, 7057, 8425, 8828, 9510	1.0079e-05	DCN, TGFBR3, LXN, LTBP4, ECM2, MDK, SMOC2, DPYSL3, RPL22, NRP2, FMOD, APOE, COL5A1, SERPINE2, THBS1, APP, CCN1, ADAMTS1, RPL29, PRELP
964	GO:0061134	peptidase regulator activity	GOMF	94	0.0759393	1.60309	1.13804e-08	3.96494e-07	up	10399, 124857, 1293, 1471, 2192, 25824, 2621, 27018, 351, 5037, 5270, 56925, 5720, 5721, 684, 7076, 7077, 7078, 710, 718, 721, 857, 871	7.58221e-07	TIMP2, FBLN1, LXN, PEBP1, PSME1, TIMP3, PSME2, CST3, TIMP1, CAV1, C3, PRDX5, BST2, SERPINE2, APP, SERPING1, SERPINH1, COL6A3, BEX3, WFIKKN2, GAS6, RACK1, C4B
1009	GO:0019955	cytokine binding	GOMF	33	0.0757374	1.60108	0.000552402	0.00687345	up	11315, 114990, 3572, 3688, 5355, 7049, 7057, 7538, 8425, 8828, 972	0.00684721	CD74, TGFBR3, LTBP4, PLP2, PARK7, NRP2, ZFP36, IL6ST, THBS1, ITGB1, VASN
1066	GO:0016675	oxidoreductase activity, acting on a heme group of donors	GOMF	22	0.0736584	1.58053	0.0065945	0.0452268	up	1327, 1329, 1337, 1345, 1347, 1349, 1351, 4697	0.0423478	COX6A1, COX7A2, COX4I1, COX7B, COX5B, COX6C, COX8A, NDUFA4
983	GO:0004866	endopeptidase inhibitor activity	GOMF	64	0.0726771	1.57092	7.84137e-06	0.000155224	up	124857, 1293, 1471, 25824, 2621, 351, 5037, 5270, 56925, 684, 7076, 7077, 7078, 710, 718, 721, 871	0.000181715	TIMP2, LXN, PEBP1, TIMP3, CST3, TIMP1, C3, PRDX5, BST2, SERPINE2, APP, SERPING1, SERPINH1, COL6A3, WFIKKN2, GAS6, C4B
1030	GO:0004867	serine-type endopeptidase inhibitor activity	GOMF	33	0.0719289	1.56363	0.0013847	0.0132535	up	124857, 1293, 351, 5037, 5270, 710, 871	0.0123007	PEBP1, SERPINE2, APP, SERPING1, SERPINH1, COL6A3, WFIKKN2
984	GO:0030414	peptidase inhibitor activity	GOMF	66	0.0710096	1.55472	1.16284e-05	0.000225074	up	124857, 1293, 1471, 25824, 2621, 351, 5037, 5270, 56925, 684, 7076, 7077, 7078, 710, 718, 721, 871	0.000258247	TIMP2, LXN, PEBP1, TIMP3, CST3, TIMP1, C3, PRDX5, BST2, SERPINE2, APP, SERPING1, SERPINH1, COL6A3, WFIKKN2, GAS6, C4B
1002	GO:0016655	oxidoreductase activity, acting on NAD(P)H, quinone or similar compound as acceptor	GOMF	47	0.0709293	1.55395	0.000199879	0.00276341	up	4697, 4710, 4713, 4714, 4715, 4716, 4724, 4725, 4729, 4835, 51079, 51181	0.00287934	NDUFB4, NDUFB7, NQO2, NDUFB10, NDUFB9, NDUFS4, NDUFB8, NDUFS5, DCXR, NDUFV2, NDUFA13, NDUFA4
1015	GO:0016765	transferase activity, transferring alkyl or aryl (other than methyl) groups	GOMF	43	0.0687879	1.5334	0.000658287	0.00744633	up	1725, 1937, 2946, 2948, 2949, 326625, 373156, 4259, 6723, 9446	0.00746525	DHPS, SRM, GSTM5, MMAB, MGST3, GSTO1, GSTM4, GSTK1, GSTM2, EEF1G
1001	GO:0015078	hydrogen ion transmembrane transporter activity	GOMF	74	0.0613873	1.46448	0.000166662	0.00234133	up	10476, 10975, 1327, 1329, 1337, 1345, 1347, 1349, 1351, 29796, 4697, 513, 516, 517, 522, 539, 7381, 7386, 7388	0.00246752	ATP5F1D, COX6A1, COX7A2, UQCR11, COX4I1, COX7B, ATP5MC2, COX5B, ATP5PF, UQCRB, ATP5MC1, COX6C, ATP5PD, UQCRFS1, UQCRH, COX8A, UQCR10, NDUFA4, ATP5PO
986	GO:1901681	sulfur compound binding	GOMF	108	0.0597412	1.44957	1.41571e-05	0.000262358	up	1289, 1622, 1809, 1842, 2331, 2946, 2948, 3030, 348, 3491, 351, 37, 4192, 5270, 5549, 56925, 6146, 6159, 64094, 7049, 7057, 8828, 9510	0.00029022	TGFBR3, ACADVL, LXN, HADHA, ECM2, MDK, SMOC2, DPYSL3, RPL22, NRP2, FMOD, APOE, COL5A1, SERPINE2, THBS1, APP, CCN1, ADAMTS1, DBI, RPL29, GSTM4, PRELP, GSTM2
1042	GO:0004252	serine-type endopeptidase activity	GOMF	51	0.0595158	1.44754	0.00259247	0.0219025	up	11098, 1509, 1514, 4313, 5654, 57414, 649, 715, 716, 7174, 718, 721, 78989, 8720	0.0204987	RHBDD2, MMP2, CTSD, COLEC11, C3, TPP2, CTSL, MBTPS1, PRSS23, C1R, HTRA1, BMP1, C1S, C4B
1006	GO:0008236	serine-type peptidase activity	GOMF	72	0.0589086	1.44209	0.000448577	0.00574574	up	11098, 1363, 1368, 1509, 1514, 165, 23478, 29952, 4313, 5654, 57414, 59342, 649, 715, 716, 7174, 718, 721, 78989, 8532, 8720	0.0058315	RHBDD2, MMP2, AEBP1, CPE, CPZ, CTSD, COLEC11, SCPEP1, C3, TPP2, CTSL, CPM, SEC11A, MBTPS1, PRSS23, C1R, HTRA1, BMP1, DPP7, C1S, C4B
1007	GO:0017171	serine hydrolase activity	GOMF	72	0.0589086	1.44209	0.000448577	0.00574574	up	11098, 1363, 1368, 1509, 1514, 165, 23478, 29952, 4313, 5654, 57414, 59342, 649, 715, 716, 7174, 718, 721, 78989, 8532, 8720	0.0058315	RHBDD2, MMP2, AEBP1, CPE, CPZ, CTSD, COLEC11, SCPEP1, C3, TPP2, CTSL, CPM, SEC11A, MBTPS1, PRSS23, C1R, HTRA1, BMP1, DPP7, C1S, C4B
1053	GO:0005178	integrin binding	GOMF	50	0.0583326	1.43694	0.00371248	0.0283646	up	10518, 1289, 1842, 2013, 3491, 3611, 3688, 3911, 667, 7057, 7077, 7094, 7106, 8425, 977	0.0263833	TIMP2, LTBP4, ECM2, COL5A1, LAMA5, CIB2, TLN1, THBS1, CCN1, ITGB1, DST, ILK, CD151, EMP2, TSPAN4
1003	GO:0009055	electron carrier activity	GOMF	85	0.0566634	1.42211	0.000312464	0.00425244	up	10975, 1327, 1329, 1337, 1345, 1347, 1349, 1351, 1537, 2109, 217, 37, 4129, 4697, 4729, 4835, 54205, 6392, 83442, 8574, 9249	0.00438271	AKR7A2, MAOB, ACADVL, ETFB, ALDH2, COX6A1, COX7A2, NQO2, UQCR11, COX4I1, COX7B, COX5B, SH3BGRL3, DHRS3, COX6C, CYCS, COX8A, NDUFV2, CYC1, NDUFA4, SDHD
1037	GO:0016651	oxidoreductase activity, acting on NAD(P)H	GOMF	69	0.0542336	1.4008	0.00212179	0.0186675	up	1666, 1727, 4697, 4710, 4713, 4714, 4715, 4716, 4724, 4725, 4729, 4835, 51079, 51181, 51292, 51295, 51706	0.0171351	NDUFB4, NDUFB7, CYB5R3, GMPR2, DECR1, NQO2, ECSIT, NDUFB10, NDUFB9, CYB5R1, NDUFS4, NDUFB8, NDUFS5, DCXR, NDUFV2, NDUFA13, NDUFA4
1152	GO:0004180	carboxypeptidase activity	GOMF	29	0.0538437	1.39741	0.0465341	0.190287	up	10404, 1363, 1368, 165, 29952, 59342, 8532	0.169881	CPQ, AEBP1, CPE, CPZ, SCPEP1, CPM, DPP7
1130	GO:0008235	metalloexopeptidase activity	GOMF	36	0.0528757	1.38902	0.030716	0.14117	up	10404, 1363, 1368, 165, 79716, 8532	0.128577	CPQ, AEBP1, CPE, CPZ, CPM, NPEPL1
1138	GO:0005125	cytokine activity	GOMF	34	0.0527076	1.38757	0.0364567	0.159567	up	114900, 4282, 6387, 649, 7076	0.142878	TIMP1, CXCL12, BMP1, C1QTNF4, MIF
1054	GO:0002020	protease binding	GOMF	66	0.05255	1.38622	0.00394168	0.0290512	up	11315, 1471, 302, 3688, 4035, 7076, 7077, 7078, 7128, 8837	0.026779	CFLAR, TIMP2, TIMP3, CST3, TIMP1, PARK7, TNFAIP3, LRP1, ITGB1, ANXA2
1207	GO:0044769	ATPase activity, coupled to transmembrane movement of ions, rotational mechanism	GOMF	26	0.0509908	1.37285	0.0796238	0.258777	up	10476, 513, 516, 517, 539	0.238424	ATP5F1D, ATP5MC2, ATP5MC1, ATP5PD, ATP5PO
1160	GO:0005507	copper ion binding	GOMF	32	0.050955	1.37254	0.0523343	0.206259	up	11315, 4016, 5066, 51596, 5621, 64745, 9973	0.183514	CUTA, PARK7, LOXL1, PAM, METTL17, PRNP, CCS
1078	GO:0001948	glycoprotein binding	GOMF	59	0.0504565	1.3683	0.00970057	0.0603514	up	1289, 1514, 2316, 3482, 3956, 567, 7057, 7431	0.0567467	VIM, LGALS1, COL5A1, CTSL, THBS1, B2M, FLNA, IGF2R
982	GO:0004857	enzyme inhibitor activity	GOMF	187	0.0503049	1.36701	7.75333e-06	0.000155224	up	100134934, 10399, 10519, 11142, 124857, 1293, 1471, 1634, 200734, 23640, 25824, 2621, 28951, 302, 307, 308, 351, 4947, 5037, 5270, 5502, 5577, 56925, 6050, 684, 7076, 7077, 7078, 710, 718, 721, 871, 9021, 94274, 9749	0.000181715	PRKAR2B, DCN, RNH1, TIMP2, TRIB2, LXN, PEBP1, TIMP3, CST3, TIMP1, PHACTR2, C3, PRDX5, BST2, HSPBP1, PPP1R1A, SERPINE2, APP, SERPING1, SERPINH1, COL6A3, ANXA5, PPP1R14A, PKIG, WFIKKN2, OAZ2, ANXA2, GAS6, SOCS3, CIB1, ANXA4, SPRED2, RACK1, C4B, TEN1
1273	GO:0043548	phosphatidylinositol 3-kinase binding	GOMF	21	0.0489278	1.35536	0.135486	0.353319	up	3643, 3667, 5159, 7301, 7494, 808	0.322385	TYRO3, XBP1, PDGFRB, CALM3, IRS1, INSR
1242	GO:0015036	disulfide oxidoreductase activity	GOMF	26	0.048478	1.35158	0.101124	0.290689	up	25828, 373156, 7295, 83442, 9446, 9973	0.265512	TXN2, TXN, SH3BGRL3, GSTO1, CCS, GSTK1
1187	GO:0005080	protein kinase C binding	GOMF	33	0.0483193	1.35024	0.0662752	0.231332	up	10399, 207, 3667, 4082, 5589, 9638	0.210266	PRKCSH, AKT1, FEZ1, IRS1, RACK1, MARCKS
1228	GO:0016859	cis-trans isomerase activity	GOMF	31	0.04642	1.3344	0.0910283	0.275455	up	2286, 23770, 4820, 5479	0.250093	FKBP8, NKTR, PPIB, FKBP2
1291	GO:0015485	cholesterol binding	GOMF	23	0.0457378	1.32875	0.152694	0.379582	up	10577, 10948, 348, 6770, 857	0.347804	CAV1, NPC2, APOE, STARD3, STAR
1243	GO:0003755	peptidyl-prolyl cis-trans isomerase activity	GOMF	30	0.0456907	1.32837	0.103293	0.295947	up	2286, 23770, 4820, 5479	0.269878	FKBP8, NKTR, PPIB, FKBP2
1288	GO:0032934	sterol binding	GOMF	25	0.0444929	1.31851	0.15032	0.375154	up	10577, 10948, 348, 6770, 857	0.343865	CAV1, NPC2, APOE, STARD3, STAR
1344	GO:0017091	AU-rich element binding	GOMF	20	0.0432016	1.30798	0.214957	0.462291	up	10949, 677, 7072, 7538	0.430722	TIA1, ZFP36, HNRNPA0, ZFP36L1
1320	GO:0042562	hormone binding	GOMF	23	0.0427598	1.30439	0.189555	0.434654	up	10952, 216, 30061, 3643	0.405357	SEC61B, SLC40A1, ALDH1A1, INSR
1057	GO:0042277	peptide binding	GOMF	120	0.0419696	1.298	0.00394391	0.0290512	up	10945, 1471, 2946, 2948, 30061, 3105, 3106, 3107, 3133, 348, 3643, 4820, 5479, 6175, 6199, 6653, 6727, 7174, 9445, 9452, 972	0.026779	CD74, ITM2A, RPLP0, CST3, KDELR1, NKTR, APOE, TPP2, ITM2B, SORL1, SLC40A1, SRP14, PPIB, GSTM4, INSR, RPS6KB2, HLA-C, HLA-E, GSTM2, HLA-B
1255	GO:0070063	RNA polymerase binding	GOMF	36	0.0413538	1.29304	0.116361	0.320011	up	274, 5479, 7538, 8106	0.291182	PABPN1, ZFP36, BIN1, PPIB
971	GO:0016491	oxidoreductase activity	GOMF	458	0.0407723	1.28838	2.31951e-07	6.31341e-06	up	10157, 10202, 10549, 10840, 10975, 11315, 1327, 1329, 1337, 1345, 1347, 1349, 1351, 154807, 1593, 1666, 1727, 216, 217, 2495, 25824, 25828, 26063, 2878, 2879, 2946, 29796, 3028, 3030, 3615, 37, 373156, 3945, 4016, 4129, 4259, 4697, 4710, 4713, 4714, 4715, 4716, 4724, 4725, 4729, 4835, 5052, 5066, 5092, 51079, 51171, 51181, 51292, 51295, 51635, 51706, 5351, 55316, 56948, 57179, 57190, 5768, 6319, …	8.83069e-06	AASS, H6PD, AKR7A2, NDUFB4, MAOB, HSD17B10, ACADVL, PLOD1, HADHA, HSD17B14, BLVRB, SCD, NDUFB7, CYB5R3, TXN2, SDR39U1, DHRS7, DHRS2, GMPR2, DECR1, BLVRA, ALDH2, LDHB, COX6A1, COX7A2, QSOX1, PARK7, PRDX1, PRDX6, HSDL2, KIAA1191, PRDX4, NQO2, PRDX5, UQCR11, LOXL1, ECSIT, COX4I1, COX7B, CYP27A1, COX5B, RSAD1, TXN, NDUFB10, SH3BGRL3, MGST3, ALDH1L1, PAM, NDUFB9, GSTO1, TM7SF2, UQCRB, CYB5R1, SELENON,…
1050	GO:0033218	amide binding	GOMF	134	0.0406914	1.28773	0.00343985	0.0269919	up	10588, 10945, 11331, 1471, 2946, 2948, 30061, 3105, 3106, 3107, 3133, 348, 3643, 4820, 5479, 6175, 6199, 6653, 6727, 7174, 9445, 9452, 972	0.0251156	CD74, ITM2A, RPLP0, CST3, KDELR1, NKTR, APOE, TPP2, ITM2B, MTHFS, SORL1, SLC40A1, SRP14, PPIB, GSTM4, INSR, RPS6KB2, HLA-C, HLA-E, GSTM2, PHB2, HLA-B
1214	GO:0008083	growth factor activity	GOMF	47	0.0401028	1.28303	0.0847613	0.266602	up	29937, 4192, 51293, 6320, 6387, 649, 7076, 80310, 84432	0.241663	TIMP1, CLEC11A, CXCL12, MDK, NENF, PROK1, CD320, BMP1, PDGFD
1332	GO:0038024	cargo receptor activity	GOMF	27	0.0392005	1.27585	0.202742	0.449333	up	26020, 3959, 4035	0.418842	LGALS3BP, LRP1, LRP10
1287	GO:0001618	virus receptor activity	GOMF	35	0.0390356	1.27455	0.149579	0.374378	up	10572, 3303, 3304, 3688, 3921, 4684, 7301	0.343645	TYRO3, NCAM1, ITGB1, RPSA, SIVA1, HSPA1B, HSPA1A
1383	GO:0015035	protein disulfide oxidoreductase activity	GOMF	20	0.0383698	1.26928	0.285226	0.556808	up	25828, 373156, 7295, 83442, 9973	0.530689	TXN2, TXN, SH3BGRL3, CCS, GSTK1
1211	GO:0004860	protein kinase inhibitor activity	GOMF	54	0.038079	1.26699	0.0833942	0.265096	up	10399, 10519, 11142, 1634, 200734, 28951, 5577, 9021	0.241571	PRKAR2B, DCN, TRIB2, PKIG, SOCS3, CIB1, SPRED2, RACK1
1264	GO:0016835	carbon-oxygen lyase activity	GOMF	45	0.0374213	1.26182	0.121382	0.325303	up	11315, 3030, 5092, 55268, 6188, 7390	0.29779	HADHA, PARK7, ECHDC2, RPS3, PCBD1, UROS
1234	GO:0019210	kinase inhibitor activity	GOMF	55	0.0365849	1.25528	0.0961838	0.283987	up	10399, 10519, 11142, 1634, 200734, 28951, 5577, 9021	0.257618	PRKAR2B, DCN, TRIB2, PKIG, SOCS3, CIB1, SPRED2, RACK1
1386	GO:0051059	NF-kappaB binding	GOMF	25	0.0352273	1.24474	0.282127	0.556808	up	170622, 307, 80279	0.530689	CDK5RAP3, COMMD6, ANXA4
1385	GO:0043028	cysteine-type endopeptidase regulator activity involved in apoptotic process	GOMF	25	0.0351424	1.24408	0.283531	0.556808	up	10399, 25824, 2621, 27018	0.530689	PRDX5, BEX3, GAS6, RACK1
1283	GO:0046332	SMAD binding	GOMF	51	0.0339053	1.23455	0.143672	0.364306	up	10273, 1278, 2316, 2353, 2626, 3725, 7041, 7049	0.332945	TGFBR3, STUB1, GATA4, TGFB1I1, COL1A2, FOS, JUN, FLNA
1163	GO:0008237	metallopeptidase activity	GOMF	95	0.0329132	1.22696	0.055346	0.212753	up	10404, 10730, 1363, 1368, 165, 4313, 649, 79716, 8532, 9510	0.191509	MMP2, CPQ, AEBP1, CPE, CPZ, CPM, YME1L1, ADAMTS1, BMP1, NPEPL1
1423	GO:0097110	scaffold protein binding	GOMF	24	0.0325523	1.22422	0.337757	0.611506	up	11315, 3856, 5605, 7431	0.577671	VIM, PARK7, MAP2K2, KRT8
1265	GO:0016616	oxidoreductase activity, acting on the CH-OH group of donors, NAD or NADP as acceptor	GOMF	64	0.0323627	1.22277	0.121798	0.325417	up	10202, 3028, 3030, 3615, 3945, 51171, 51181, 8574, 9249, 9563	0.29779	H6PD, AKR7A2, HSD17B10, HADHA, HSD17B14, DHRS2, LDHB, DHRS3, DCXR, IMPDH2
1335	GO:0016667	oxidoreductase activity, acting on a sulfur group of donors	GOMF	43	0.0321429	1.2211	0.207251	0.455796	up	25828, 373156, 5768, 7295, 83442, 9446, 9973	0.422638	TXN2, QSOX1, TXN, SH3BGRL3, GSTO1, CCS, GSTK1
1329	GO:0016627	oxidoreductase activity, acting on the CH-CH group of donors	GOMF	45	0.0319922	1.21996	0.199599	0.445595	up	1666, 26063, 37, 55316, 6392, 644, 645, 7108	0.415572	ACADVL, BLVRB, DECR1, BLVRA, RSAD1, TM7SF2, SDHD, DECR2
1180	GO:0030246	carbohydrate binding	GOMF	97	0.0317385	1.21804	0.0636736	0.230123	up	10423, 23324, 2995, 3482, 3956, 3958, 3998, 4123, 6320, 682, 721, 78989	0.209242	MAN2B2, LMAN1, LGALS1, CDIPT, CLEC11A, COLEC11, LGALS3, GYPC, MAN2C1, BSG, IGF2R, C4B
1046	GO:0098632	protein binding involved in cell-cell adhesion	GOMF	265	0.0315098	1.21631	0.00286473	0.0233195	up	10399, 10848, 11135, 11315, 114793, 114990, 1192, 1265, 1627, 1936, 1937, 2316, 302, 3303, 3646, 3688, 4627, 5052, 5339, 55082, 55898, 56904, 5694, 57175, 6128, 6130, 6138, 6147, 6152, 6159, 6164, 6187, 6231, 6624, 6711, 682, 7094, 79026, 800, 8407, 8496, 85456, 8971, 9045, 9351, 9588, 9973	0.0215057	CNN2, SLC9A3R2, FSCN1, RPL6, MYH9, EIF3E, EEF1D, PPP1R13L, RPL34, PPFIBP1, DBN1, RPL24, SPTBN1, PARK7, PRDX1, PRDX6, CALD1, AHNAK, CDC42EP1, ARGLU1, TLN1, UNC45A, RPS2, PSMB6, RPL7A, SH3GLB2, TNKS1BP1, ITGB1, FMNL2, TAGLN2, RPL29, VASN, BSG, CORO1B, CCS, RPL15, PLEC, ANXA2, H1FX, RPL14, FLNA, RPS26, RPL23A, HSPA1A, RACK1, CLIC1, EEF1G
1048	GO:0098641	cadherin binding involved in cell-cell adhesion	GOMF	261	0.0314684	1.216	0.00311519	0.0248929	up	10399, 10848, 11135, 11315, 114793, 114990, 1192, 1265, 1627, 1936, 1937, 2316, 302, 3303, 3646, 3688, 4627, 5052, 5339, 55082, 55898, 56904, 5694, 57175, 6128, 6130, 6138, 6147, 6152, 6159, 6164, 6187, 6231, 6624, 6711, 682, 7094, 79026, 800, 8407, 8496, 85456, 8971, 9045, 9351, 9588, 9973	0.023061	CNN2, SLC9A3R2, FSCN1, RPL6, MYH9, EIF3E, EEF1D, PPP1R13L, RPL34, PPFIBP1, DBN1, RPL24, SPTBN1, PARK7, PRDX1, PRDX6, CALD1, AHNAK, CDC42EP1, ARGLU1, TLN1, UNC45A, RPS2, PSMB6, RPL7A, SH3GLB2, TNKS1BP1, ITGB1, FMNL2, TAGLN2, RPL29, VASN, BSG, CORO1B, CCS, RPL15, PLEC, ANXA2, H1FX, RPL14, FLNA, RPS26, RPL23A, HSPA1A, RACK1, CLIC1, EEF1G
1045	GO:0005509	calcium ion binding	GOMF	275	0.0311612	1.21368	0.0027404	0.0225178	up	103910, 10398, 10518, 10519, 10627, 114327, 140465, 2192, 2621, 2934, 302, 307, 308, 4035, 4147, 4256, 4637, 4924, 5066, 51150, 5530, 553115, 5589, 55959, 57190, 57333, 6277, 6281, 64094, 649, 667, 6678, 7057, 715, 716, 7171, 7178, 80274, 808, 80864, 823, 826, 8404, 8425, 89941, 90411, 94121	0.0208662	CAPN1, FBLN1, SDF4, LTBP4, MYL6, EFHC1, MYL9, MYL12A, SYTL4, NUCB1, MGP, SMOC2, SPARC, MYL12B, LRP1, CAPNS1, PRKCSH, MATN2, TPT1, CIB2, THBS1, PPP3CA, RHOT2, RCN3, PAM, GSN, DST, SPARCL1, SCUBE1, C1R, CALM3, SELENON, PEF1, ANXA5, TPM4, BMP1, MCFD2, C1S, ANXA2, GAS6, CIB1, MYL6B, SULF2, ANXA4, S100A10, S100A6, EGFL8
1346	GO:0019199	transmembrane receptor protein kinase activity	GOMF	44	0.0311536	1.21362	0.218947	0.467666	up	3482, 3643, 5159, 6259, 7049, 7301, 780, 8425, 8828	0.435443	TGFBR3, LTBP4, TYRO3, PDGFRB, NRP2, RYK, INSR, IGF2R, DDR1
1398	GO:0016782	transferase activity, transferring sulfur-containing groups	GOMF	31	0.0310595	1.21291	0.303143	0.575733	up	3340, 4357, 81605	0.550042	NDST1, MPST, URM1
1052	GO:0098631	protein binding involved in cell adhesion	GOMF	267	0.0308074	1.21101	0.00355103	0.0273712	up	10399, 10848, 11135, 11315, 114793, 114990, 1192, 1265, 1627, 1936, 1937, 2316, 302, 3303, 3646, 3688, 4627, 5052, 5339, 55082, 55898, 56904, 5694, 57175, 6128, 6130, 6138, 6147, 6152, 6159, 6164, 6187, 6231, 6624, 6711, 682, 7094, 79026, 800, 8407, 8496, 85456, 8971, 9045, 9351, 9588, 9973	0.025577	CNN2, SLC9A3R2, FSCN1, RPL6, MYH9, EIF3E, EEF1D, PPP1R13L, RPL34, PPFIBP1, DBN1, RPL24, SPTBN1, PARK7, PRDX1, PRDX6, CALD1, AHNAK, CDC42EP1, ARGLU1, TLN1, UNC45A, RPS2, PSMB6, RPL7A, SH3GLB2, TNKS1BP1, ITGB1, FMNL2, TAGLN2, RPL29, VASN, BSG, CORO1B, CCS, RPL15, PLEC, ANXA2, H1FX, RPL14, FLNA, RPS26, RPL23A, HSPA1A, RACK1, CLIC1, EEF1G
1356	GO:0072341	modified amino acid binding	GOMF	43	0.0304641	1.20843	0.23647	0.494833	up	10588, 2621, 2946, 2948, 7057	0.465944	MTHFS, THBS1, GSTM4, GAS6, GSTM2
1029	GO:0050839	cell adhesion molecule binding	GOMF	341	0.0303542	1.20761	0.0013132	0.0127088	up	10399, 10518, 10848, 11135, 11315, 114793, 114990, 1192, 1265, 1289, 1363, 1627, 1842, 1936, 1937, 199731, 2013, 2316, 302, 3303, 3491, 3611, 3646, 3688, 3911, 4627, 5052, 5339, 55082, 55898, 56904, 5694, 57175, 5781, 6128, 6130, 6138, 6147, 6152, 6159, 6164, 6187, 6231, 6624, 667, 6711, 682, 7057, 7077, 7094, 7106, 79026, 800, 8407, 8425, 8496, 85456, 8727, 8971, 9045, 9351, 9588, 977, 9973	0.0118633	TIMP2, CNN2, SLC9A3R2, FSCN1, RPL6, LTBP4, MYH9, EIF3E, EEF1D, PPP1R13L, CADM4, ECM2, CPE, RPL34, PPFIBP1, DBN1, RPL24, SPTBN1, PARK7, PRDX1, PRDX6, CTNNAL1, CALD1, AHNAK, CDC42EP1, COL5A1, LAMA5, ARGLU1, CIB2, TLN1, THBS1, UNC45A, RPS2, PSMB6, CCN1, RPL7A, SH3GLB2, TNKS1BP1, ITGB1, DST, FMNL2, TAGLN2, RPL29, ILK, VASN, BSG, CORO1B, CCS, RPL15, CD151, PLEC, PTPN11, ANXA2, H1FX, RPL14, FLNA, RPS26…
1405	GO:0016836	hydro-lyase activity	GOMF	31	0.0301057	1.20574	0.320879	0.598877	up	11315, 3030, 5092, 55268, 7390	0.568587	HADHA, PARK7, ECHDC2, PCBD1, UROS
1353	GO:0003743	translation initiation factor activity	GOMF	49	0.0290855	1.19812	0.231525	0.487098	up	1939, 27335, 3646, 3692, 51386, 8663, 8664, 8665, 8666	0.458747	EIF3L, EIF3D, EIF3E, EIF3G, EIF2D, EIF3F, EIF3K, EIF3C, EIF6
1065	GO:0045296	cadherin binding	GOMF	272	0.0288822	1.19661	0.00631091	0.0437899	up	10399, 10848, 11135, 11315, 114793, 114990, 1192, 1265, 1627, 1936, 1937, 2316, 302, 3303, 3646, 3688, 4627, 5052, 5339, 55082, 55898, 56904, 5694, 57175, 6128, 6130, 6138, 6147, 6152, 6159, 6164, 6187, 6231, 6624, 6711, 682, 7094, 79026, 800, 8407, 8496, 85456, 8727, 8971, 9045, 9351, 9588, 9973	0.0411755	CNN2, SLC9A3R2, FSCN1, RPL6, MYH9, EIF3E, EEF1D, PPP1R13L, RPL34, PPFIBP1, DBN1, RPL24, SPTBN1, PARK7, PRDX1, PRDX6, CTNNAL1, CALD1, AHNAK, CDC42EP1, ARGLU1, TLN1, UNC45A, RPS2, PSMB6, RPL7A, SH3GLB2, TNKS1BP1, ITGB1, FMNL2, TAGLN2, RPL29, VASN, BSG, CORO1B, CCS, RPL15, PLEC, ANXA2, H1FX, RPL14, FLNA, RPS26, RPL23A, HSPA1A, RACK1, CLIC1, EEF1G
1472	GO:0032813	tumor necrosis factor receptor superfamily binding	GOMF	23	0.0286571	1.19494	0.419144	0.686594	up	10572, 27018, 8837	0.658654	CFLAR, BEX3, SIVA1
1380	GO:0000979	RNA polymerase II core promoter sequence-specific DNA binding	GOMF	41	0.0284469	1.19338	0.285755	0.556808	up	1051, 2353, 2627, 3015, 64324	0.530689	GATA6, H2AFZ, NSD1, FOS, CEBPB
1419	GO:0017022	myosin binding	GOMF	34	0.0282725	1.19208	0.334097	0.611506	up	103910, 10398, 2934, 55591, 800	0.577671	VEZT, MYL9, MYL12B, CALD1, GSN
1406	GO:0048306	calcium-dependent protein binding	GOMF	36	0.0282547	1.19195	0.320727	0.598877	up	26012, 302, 307, 6277, 808	0.568587	CALM3, NSMF, ANXA2, ANXA4, S100A6
1293	GO:0016614	oxidoreductase activity, acting on CH-OH group of donors	GOMF	75	0.0281928	1.19149	0.154493	0.380122	up	10202, 154807, 3028, 3030, 3615, 3945, 51171, 51181, 8574, 9249, 9563	0.349467	H6PD, AKR7A2, HSD17B10, HADHA, HSD17B14, DHRS2, LDHB, DHRS3, DCXR, IMPDH2, VKORC1L1
1192	GO:0019207	kinase regulator activity	GOMF	126	0.0280684	1.19057	0.0677789	0.233342	up	1019, 10399, 10519, 11140, 11142, 1634, 200734, 2621, 285016, 28951, 5577, 5605, 57018, 6176, 808, 81669, 9021, 9314	0.212507	PRKAR2B, DCN, TRIB2, CDC37, MAP2K2, CDK4, KLF4, RPLP1, CALM3, CCNL1, PKIG, GAS6, SOCS3, CIB1, ALKAL2, SPRED2, RACK1, CCNL2
1306	GO:0008238	exopeptidase activity	GOMF	71	0.02765	1.18748	0.175347	0.41502	up	10404, 1363, 1368, 165, 29952, 59342, 7174, 79716, 8532, 90507	0.384609	CPQ, AEBP1, CPE, CPZ, SCPEP1, TPP2, CPM, SCRN2, DPP7, NPEPL1
1440	GO:0051018	protein kinase A binding	GOMF	32	0.027335	1.18516	0.367352	0.638649	up	10142, 5566, 5577, 6188, 8227, 9590	0.609964	PRKAR2B, PRKACA, AKAP9, AKAP12, RPS3, AKAP17A
1494	GO:0033293	monocarboxylic acid binding	GOMF	21	0.0273123	1.18499	0.465168	0.730021	up	3482, 5730	0.702364	PTGDS, IGF2R
1432	GO:0004714	transmembrane receptor protein tyrosine kinase activity	GOMF	33	0.0273021	1.18492	0.360686	0.632333	up	3482, 3643, 5159, 6259, 7301, 780, 8828	0.602651	TYRO3, PDGFRB, NRP2, RYK, INSR, IGF2R, DDR1
1245	GO:0019887	protein kinase regulator activity	GOMF	114	0.0263598	1.178	0.105485	0.300252	up	1019, 10399, 10519, 11140, 11142, 1634, 200734, 2621, 285016, 28951, 5577, 5605, 57018, 6176, 808, 81669, 9021	0.272929	PRKAR2B, DCN, TRIB2, CDC37, MAP2K2, CDK4, RPLP1, CALM3, CCNL1, PKIG, GAS6, SOCS3, CIB1, ALKAL2, SPRED2, RACK1, CCNL2
1374	GO:0008144	drug binding	GOMF	55	0.0257625	1.17363	0.270572	0.540523	up	2286, 23770, 4502, 4820, 539, 5530, 6624	0.515052	FSCN1, FKBP8, NKTR, MT2A, PPP3CA, FKBP2, ATP5PO
1411	GO:0004222	metalloendopeptidase activity	GOMF	44	0.0255625	1.17217	0.328195	0.605631	up	10730, 4313, 649, 9510	0.575421	MMP2, YME1L1, ADAMTS1, BMP1
1505	GO:0005544	calcium-dependent phospholipid binding	GOMF	22	0.0254575	1.17141	0.490448	0.754735	up	302, 307, 308, 94121	0.724124	SYTL4, ANXA5, ANXA2, ANXA4
1318	GO:0008135	translation factor activity, RNA binding	GOMF	81	0.025374	1.1708	0.1899	0.434654	up	1915, 1933, 1936, 1937, 1939, 27335, 3646, 3692, 51386, 7284, 8663, 8664, 8665, 8666	0.405357	EIF3L, EIF3D, EIF3E, EEF1D, EEF1B2, EIF3G, EIF2D, EEF1A1, EIF3F, TUFM, EIF3K, EIF3C, EIF6, EEF1G
1479	GO:0016903	oxidoreductase activity, acting on the aldehyde or oxo group of donors	GOMF	31	0.0246209	1.16534	0.431035	0.695243	up	10840, 216, 217	0.663993	ALDH2, ALDH1L1, ALDH1A1
1531	GO:0030291	protein serine/threonine kinase inhibitor activity	GOMF	20	0.0244	1.16374	0.530865	0.78198	up	10519, 11142, 200734, 5577	0.766805	PRKAR2B, PKIG, CIB1, SPRED2
1458	GO:0005496	steroid binding	GOMF	36	0.0243282	1.16322	0.402735	0.673805	up	10577, 10948, 348, 6770, 857	0.643183	CAV1, NPC2, APOE, STARD3, STAR
1232	GO:0015077	monovalent inorganic cation transmembrane transporter activity	GOMF	148	0.024192	1.16223	0.0952091	0.282065	up	10476, 10975, 1327, 1329, 1337, 1345, 1347, 1349, 1351, 29796, 4697, 513, 516, 517, 522, 539, 6332, 7381, 7386, 7388, 80024	0.256295	SLC8B1, ATP5F1D, COX6A1, COX7A2, UQCR11, COX4I1, COX7B, ATP5MC2, COX5B, SCN7A, ATP5PF, UQCRB, ATP5MC1, COX6C, ATP5PD, UQCRFS1, UQCRH, COX8A, UQCR10, NDUFA4, ATP5PO
1345	GO:0001085	RNA polymerase II transcription factor binding	GOMF	81	0.0240577	1.16126	0.217105	0.46576	up	123016, 2067, 2091, 2626, 2627, 3400, 3725, 468, 7494, 9314	0.433397	ERCC1, XBP1, FBL, ATF4, GATA4, KLF4, GATA6, TTC8, ID4, JUN
1455	GO:0043178	alcohol binding	GOMF	40	0.0234247	1.1567	0.398196	0.672368	up	10423, 10577, 10948, 348, 5947, 6770, 857	0.642656	CDIPT, CAV1, RBP1, NPC2, APOE, STARD3, STAR
1522	GO:0016620	oxidoreductase activity, acting on the aldehyde or oxo group of donors, NAD or NADP as acceptor	GOMF	24	0.0230619	1.1541	0.519602	0.776283	up	10840, 216, 217	0.754626	ALDH2, ALDH1L1, ALDH1A1
1416	GO:0003705	transcription factor activity, RNA polymerase II distal enhancer sequence-specific binding	GOMF	54	0.0229098	1.15301	0.338951	0.611506	up	1051, 170302, 2627, 3725, 4779, 4784	0.577671	ARX, NFIX, NFE2L1, GATA6, CEBPB, JUN
1445	GO:0000980	RNA polymerase II distal enhancer sequence-specific DNA binding	GOMF	51	0.0217011	1.14438	0.381597	0.65486	up	170302, 3015, 3725, 4779, 53615, 60	0.62775	ARX, MBD3, ACTB, NFE2L1, H2AFZ, JUN
1550	GO:0004864	protein phosphatase inhibitor activity	GOMF	22	0.0216484	1.14401	0.565606	0.806289	up	5502, 94274, 9749	0.799079	PHACTR2, PPP1R1A, PPP1R14A
1410	GO:0001046	core promoter sequence-specific DNA binding	GOMF	80	0.0196489	1.12988	0.327327	0.605311	up	1051, 170959, 2353, 2627, 3015, 4297, 468, 55011, 64324, 6659	0.575421	PIH1D1, KMT2A, SOX4, ATF4, GATA6, H2AFZ, NSD1, FOS, CEBPB, ZNF431
1446	GO:0001158	enhancer sequence-specific DNA binding	GOMF	64	0.0196317	1.12976	0.380819	0.65486	up	170302, 2626, 3015, 3725, 4779, 53615, 60, 7494	0.62775	ARX, MBD3, ACTB, NFE2L1, XBP1, GATA4, H2AFZ, JUN
1496	GO:0004553	hydrolase activity, hydrolyzing O-glycosyl compounds	GOMF	44	0.0195083	1.12889	0.469795	0.733318	up	23324, 284004, 4123, 4758	0.705354	MAN2B2, MAN2C1, HEXD
1579	GO:0035035	histone acetyltransferase binding	GOMF	22	0.0186272	1.12273	0.626473	0.854411	up	10370, 1051, 1958, 23741	0.840761	EGR1, CITED2, CEBPB, EID1
1322	GO:0004175	endopeptidase activity	GOMF	181	0.0176444	1.11589	0.193654	0.43811	up	10730, 11098, 1509, 1514, 1522, 4313, 553115, 5654, 5682, 5689, 5692, 5694, 5699, 57414, 649, 715, 716, 7174, 718, 721, 78989, 81502, 823, 826, 8720, 8722, 8837, 9510	0.407791	CFLAR, RHBDD2, PSMB1, CAPN1, MMP2, CTSZ, HM13, CTSD, COLEC11, C3, CAPNS1, PSMA1, TPP2, CTSL, YME1L1, MBTPS1, PSMB6, PRSS23, ADAMTS1, PSMB4, C1R, PEF1, HTRA1, BMP1, CTSF, C1S, PSMB10, C4B
1556	GO:0017069	snRNA binding	GOMF	34	0.0171018	1.11213	0.581804	0.821315	up	51691, 57819	0.813914	LSM8, LSM2
1553	GO:0030971	receptor tyrosine kinase binding	GOMF	38	0.0166107	1.10874	0.572764	0.812503	up	10399, 2621, 285016, 3667, 5781	0.805496	IRS1, PTPN11, GAS6, ALKAL2, RACK1
1511	GO:0005319	lipid transporter activity	GOMF	55	0.0163738	1.10711	0.504634	0.76842	up	27166, 348, 6770	0.740964	APOE, STAR, PRELID1
1275	GO:0070011	peptidase activity, acting on L-amino acid peptides	GOMF	315	0.0155896	1.10173	0.13729	0.355891	up	10404, 10730, 11098, 126119, 1363, 1368, 1509, 1514, 1522, 165, 23478, 29952, 4313, 553115, 5654, 5682, 5689, 5692, 5694, 5699, 57414, 59342, 649, 7128, 715, 716, 7174, 718, 721, 7353, 78989, 79716, 81502, 823, 826, 8532, 8665, 8720, 8722, 8837, 90507, 9510	0.323785	CFLAR, RHBDD2, PSMB1, CAPN1, UFD1, MMP2, CTSZ, HM13, CPQ, AEBP1, CPE, CPZ, CTSD, COLEC11, TNFAIP3, SCPEP1, C3, CAPNS1, PSMA1, TPP2, CTSL, CPM, YME1L1, SEC11A, MBTPS1, SCRN2, PSMB6, PRSS23, ADAMTS1, PSMB4, C1R, JOSD2, PEF1, HTRA1, BMP1, CTSF, EIF3F, DPP7, C1S, PSMB10, NPEPL1, C4B
1482	GO:0005126	cytokine receptor binding	GOMF	85	0.0155441	1.10142	0.433881	0.695968	up	10572, 200734, 27018, 3572, 4282, 6387, 649, 7049, 8565, 8837	0.666451	CFLAR, TGFBR3, CXCL12, IL6ST, YARS, BEX3, BMP1, SIVA1, SPRED2, MIF
1151	GO:0005102	receptor binding	GOMF	675	0.0147283	1.09585	0.0461106	0.189445	up	10005, 10142, 10273, 10399, 1051, 10518, 10521, 10572, 11018, 11315, 11331, 114900, 1289, 1363, 1622, 1842, 1891, 199731, 200734, 2013, 203068, 2114, 2274, 2316, 23710, 25824, 26063, 2621, 27018, 27173, 2734, 2771, 285016, 2946, 29937, 3133, 3303, 3304, 348, 3485, 3487, 3489, 3491, 351, 3572, 3611, 3643, 3667, 3688, 3718, 3727, 373156, 3908, 3911, 4035, 4192, 4282, 5064, 51024, 51293, 5159, 5270,…	0.169496	CFLAR, CD74, TIMP2, HOMER3, SLC9A3R2, TGFBR3, UFD1, SMARCD3, LTBP4, GLG1, TMED1, PALM, DDX17, ACOT8, TIMP1, SYTL4, STUB1, ECH1, CLEC11A, JAK3, CADM4, CAV1, RARRES2, ECM2, CXCL12, CPE, MDK, CD81, PDGFRB, GNAI2, SNX17, IGFBP2, FHL2, PARK7, NENF, HMGN3, LRP1, C3, PRDX5, AKAP9, APOE, JUND, COL5A1, LAMA5, IL6ST, YARS, SERPINE2, CIB2, TLN1, THBS1, GABARAPL1, TGFB1I1, IGFBP4, APP, SH3BGRL3, CCN1, PROK1,…
1624	GO:0046961	proton-transporting ATPase activity, rotational mechanism	GOMF	20	0.0147128	1.09575	0.719188	0.913252	up	513	0.897196	ATP5F1D
1334	GO:0003779	actin binding	GOMF	261	0.0145806	1.09485	0.206064	0.454385	up	10109, 1072, 114793, 1265, 1627, 2316, 23345, 274, 2934, 3688, 4082, 4627, 4638, 5339, 57175, 644150, 65108, 6624, 667, 6711, 6840, 6876, 7094, 7114, 7145, 7169, 7171, 800, 8727, 9168, 9749	0.422432	TMSB10, CNN2, MYLK, FSCN1, TNS1, MYH9, PHACTR2, DBN1, SPTBN1, CTNNAL1, WIPF3, CALD1, SYNE1, BIN1, TLN1, GSN, TAGLN, ITGB1, DST, FMNL2, ARPC2, TPM4, CORO1B, CFL1, MARCKSL1, PLEC, FLNA, SVIL, TPM2, TMSB4X, MARCKS
1303	GO:0008233	peptidase activity	GOMF	325	0.0142333	1.09248	0.170988	0.40915	up	10404, 10730, 11098, 11315, 126119, 1363, 1368, 1509, 1514, 1522, 165, 23478, 29952, 4313, 553115, 5654, 5682, 5689, 5692, 5694, 5699, 57414, 59342, 649, 7128, 715, 716, 7174, 718, 721, 7353, 78989, 79716, 81502, 823, 826, 8532, 8665, 8720, 8722, 8837, 90507, 9510	0.379736	CFLAR, RHBDD2, PSMB1, CAPN1, UFD1, MMP2, CTSZ, HM13, CPQ, AEBP1, CPE, CPZ, PARK7, CTSD, COLEC11, TNFAIP3, SCPEP1, C3, CAPNS1, PSMA1, TPP2, CTSL, CPM, YME1L1, SEC11A, MBTPS1, SCRN2, PSMB6, PRSS23, ADAMTS1, PSMB4, C1R, JOSD2, PEF1, HTRA1, BMP1, CTSF, EIF3F, DPP7, C1S, PSMB10, NPEPL1, C4B
1573	GO:0019829	cation-transporting ATPase activity	GOMF	43	0.0139041	1.09025	0.620253	0.852114	up	10476, 513, 516, 517, 539	0.839073	ATP5F1D, ATP5MC2, ATP5MC1, ATP5PD, ATP5PO
1570	GO:0019842	vitamin binding	GOMF	46	0.0137651	1.08931	0.61221	0.845063	up	10588, 5066, 51293, 5351, 5947, 79701	0.834547	PLOD1, RBP1, MTHFS, PAM, CD320, OGFOD3
1212	GO:0030234	enzyme regulator activity	GOMF	591	0.0136546	1.08856	0.0829715	0.265096	up	100134934, 1019, 10399, 10519, 11135, 11140, 11142, 11315, 124857, 1293, 1471, 1634, 163590, 200734, 207, 216, 2192, 23102, 23640, 23645, 23741, 25824, 2621, 27018, 285016, 28951, 302, 307, 308, 348, 351, 3725, 4660, 4947, 5037, 5270, 54453, 5502, 5577, 5605, 5660, 56925, 57018, 5720, 5721, 6001, 6050, 6176, 684, 7076, 7077, 7078, 710, 718, 721, 79735, 808, 81669, 83442, 857, 871, 8818, 8837, 902…	0.241571	CFLAR, PRKAR2B, DCN, RNH1, TIMP2, TRIB2, PPP1R12B, FBLN1, LXN, PPP1R15A, PEBP1, PSME1, TIMP3, PSME2, CST3, TIMP1, TBC1D17, CDC37, CAV1, SH3PXD2A, PHACTR2, PARK7, C3, TRIP10, PRDX5, MAP2K2, CDC42EP1, APOE, BST2, RIN2, HSPBP1, CDK4, PPP1R1A, SERPINE2, KLF4, DPM2, RPLP1, APP, AKT1, SH3BGRL3, RGS10, SERPING1, SERPINH1, CALM3, COL6A3, CCNL1, ANXA5, ALDH1A1, BEX3, TBC1D2B, PPP1R14A, PKIG, TOR1AIP2, WFI…
1625	GO:0099516	ion antiporter activity	GOMF	25	0.0133527	1.08652	0.717091	0.913252	up	6508, 80024, 8402	0.897196	SLC8B1, SLC25A11, SLC4A3
1628	GO:0017112	Rab guanyl-nucleotide exchange factor activity	GOMF	24	0.013199	1.08548	0.725801	0.913963	up	23258, 54453, 58485, 6764	0.897196	RIN2, ST5, TRAPPC1, DENND5A
1629	GO:0043531	ADP binding	GOMF	24	0.0131947	1.08546	0.725891	0.913963	up	1727, 4627, 513	0.897196	ATP5F1D, CYB5R3, MYH9
1608	GO:0004177	aminopeptidase activity	GOMF	30	0.0129015	1.08348	0.702047	0.908786	up	29952, 7174, 79716	0.888835	TPP2, DPP7, NPEPL1
1282	GO:0032403	protein complex binding	GOMF	492	0.0125918	1.0814	0.14349	0.364306	up	10109, 1019, 10491, 10518, 1072, 10972, 114897, 1289, 1514, 1634, 1842, 2013, 203068, 2192, 2217, 2316, 23345, 23522, 25828, 274, 2771, 3015, 3030, 3491, 3611, 3667, 3688, 3856, 3911, 3958, 4035, 4060, 4082, 4627, 4697, 4830, 51160, 53615, 5479, 55719, 55845, 57175, 5781, 60, 6229, 644150, 6624, 667, 6678, 6711, 6840, 7049, 7057, 7077, 7094, 7106, 7353, 7386, 7431, 780, 81858, 8404, 8425, 871, 87…	0.332945	CFLAR, DCN, CD74, VIM, TIMP2, TGFBR3, UFD1, MBD3, FSCN1, ACTB, FBLN1, HADHA, LTBP4, MYH9, TXN2, RBX1, FCGRT, ECM2, CD81, SPARC, GNAI2, SPTBN1, HMGN3, CTNNAL1, SLF2, WIPF3, LRP1, COL5A1, LAMA5, SYNE1, LGALS3, CTSL, CDK4, CIB2, BIN1, TLN1, THBS1, RPS24, LUM, CCN1, SERPINH1, ITGB1, DST, SPARCL1, KAT6B, VPS28, ARPC2, H2AFZ, ILK, PPIB, UQCRFS1, IRS1, CRTAP, TMED10, KRT8, CORO1B, CFL1, C1QTNF1, CD151, …
1652	GO:0001786	phosphatidylserine binding	GOMF	20	0.0125888	1.08138	0.760715	0.925463	up	2621, 7057	0.905047	THBS1, GAS6
1578	GO:0032947	protein complex scaffold	GOMF	55	0.0121617	1.07851	0.62712	0.854411	up	10142, 10399, 286257, 55004, 857, 9351	0.840761	SLC9A3R2, CAV1, AKAP9, PAXX, LAMTOR1, RACK1
1594	GO:1990782	protein tyrosine kinase binding	GOMF	40	0.012111	1.07817	0.679705	0.903851	up	10399, 2621, 285016, 3667, 5781	0.886995	IRS1, PTPN11, GAS6, ALKAL2, RACK1
1635	GO:0046915	transition metal ion transmembrane transporter activity	GOMF	29	0.0118299	1.07629	0.731452	0.915366	up	27173, 30061, 51312, 7922	0.898304	SLC39A7, SLC40A1, SLC39A1, SLC25A37
1651	GO:0030544	Hsp70 protein binding	GOMF	24	0.01177	1.07589	0.756056	0.924894	up	10273, 51501, 55869, 6188, 84223	0.903537	STUB1, IQCG, HDAC8, HIKESHI, RPS3
1500	GO:0001077	transcriptional activator activity, RNA polymerase II core promoter proximal region sequence-specific binding	GOMF	129	0.0117186	1.07554	0.476522	0.739841	up	10488, 1051, 1052, 1649, 1958, 2353, 2354, 3164, 3725, 3726, 468, 4692, 4781, 4782, 64710, 6659, 9314	0.711446	NUCKS1, CREB3, EGR1, NR4A1, SOX4, FOSB, ATF4, KLF4, NFIC, NFIB, FOS, JUNB, CEBPB, DDIT3, JUN, NDN, CEBPD
1669	GO:0016538	cyclin-dependent protein serine/threonine kinase regulator activity	GOMF	20	0.0109389	1.07035	0.792849	0.939329	up	1019, 57018, 81669	0.924135	CDK4, CCNL1, CCNL2
1665	GO:0004869	cysteine-type endopeptidase inhibitor activity	GOMF	23	0.0107709	1.06923	0.781759	0.939329	up	1471, 25824, 2621	0.921853	CST3, PRDX5, GAS6
1640	GO:0031492	nucleosomal DNA binding	GOMF	33	0.0107008	1.06876	0.741887	0.92049	up	3015, 53615, 60, 9324	0.900322	MBD3, ACTB, HMGN3, H2AFZ
1647	GO:0048365	Rac GTPase binding	GOMF	33	0.0103966	1.06674	0.749306	0.921352	up	2316, 55845, 857	0.900322	CAV1, FLNA, BRK1
1559	GO:0001664	G-protein coupled receptor binding	GOMF	99	0.0102707	1.06591	0.586329	0.823698	up	10273, 2316, 2771, 3303, 3304, 5064, 5660, 5781, 6259, 6387, 718, 808, 84432, 8565, 9454	0.8153	HOMER3, PALM, STUB1, CXCL12, GNAI2, C3, YARS, PROK1, CALM3, RYK, PTPN11, FLNA, PSAP, HSPA1B, HSPA1A
1403	GO:0008134	transcription factor binding	GOMF	374	0.00989547	1.06343	0.317536	0.596065	up	10174, 1051, 10848, 11315, 123016, 1649, 170622, 1831, 2067, 2091, 2274, 2316, 23468, 23522, 2353, 2354, 23710, 2626, 2627, 27254, 2878, 28951, 307, 3400, 3725, 3726, 3727, 468, 55869, 5591, 57801, 60, 6188, 64324, 64710, 6604, 7494, 80279, 84148, 9314, 9324	0.567943	ERCC1, NUCKS1, TRIB2, ACTB, SMARCD3, CBX5, XBP1, KAT8, PPP1R13L, FBL, CDK5RAP3, FHL2, PARK7, HMGN3, SORBS3, FOSB, ATF4, JUND, GATA4, KLF4, GABARAPL1, GATA6, HDAC8, RPS3, KAT6B, TSC22D3, TTC8, NSD1, FOS, JUNB, ID4, CEBPB, CSDC2, DDIT3, JUN, COMMD6, HES4, FLNA, ANXA4, GPX3, PRKDC
1501	GO:0001228	transcriptional activator activity, RNA polymerase II transcription regulatory region sequence-specific binding	GOMF	183	0.0098514	1.06314	0.481072	0.743956	up	10488, 1051, 1052, 1649, 1958, 2353, 2354, 23764, 2626, 2627, 3164, 3725, 3726, 4094, 468, 4692, 4779, 4781, 4782, 64651, 64710, 6659, 9314	0.714237	NUCKS1, NFE2L1, CREB3, EGR1, NR4A1, SOX4, FOSB, ATF4, GATA4, KLF4, GATA6, NFIC, CSRNP1, NFIB, FOS, JUNB, CEBPB, DDIT3, JUN, MAF, NDN, MAFF, CEBPD
1673	GO:0019212	phosphatase inhibitor activity	GOMF	23	0.00983988	1.06306	0.801029	0.939329	up	5502, 94274, 9749	0.924135	PHACTR2, PPP1R1A, PPP1R14A
1679	GO:0042162	telomeric DNA binding	GOMF	28	0.00950046	1.06082	0.788709	0.939329	up	100134934, 3178, 79035	0.923916	HNRNPA1, NABP2, TEN1
1688	GO:0016877	ligase activity, forming carbon-sulfur bonds	GOMF	25	0.00913729	1.05843	0.807847	0.939573	up	6296, 8802	0.924135	ACSM3, SUCLG1
1689	GO:0001102	RNA polymerase II activating transcription factor binding	GOMF	26	0.00877112	1.05602	0.812132	0.940119	up	3725	0.924928	JUN
1581	GO:0016853	isomerase activity	GOMF	108	0.008737	1.0558	0.631235	0.856395	up	128240, 1891, 2286, 23770, 4282, 4820, 51477, 5223, 5236, 5372, 5479, 5730, 5768, 81888	0.841121	PGM1, PMM1, ECH1, ISYNA1, FKBP8, PTGDS, NKTR, QSOX1, NAXE, PPIB, PGAM1, FKBP2, HYI, MIF
1598	GO:0051015	actin filament binding	GOMF	82	0.00845026	1.05392	0.685721	0.904944	up	10109, 1072, 2316, 23345, 274, 4082, 4627, 57175, 644150, 6624, 6840, 7094, 8727	0.886995	FSCN1, MYH9, CTNNAL1, WIPF3, SYNE1, BIN1, TLN1, ARPC2, CORO1B, CFL1, FLNA, SVIL, MARCKS
1715	GO:0046966	thyroid hormone receptor binding	GOMF	23	0.00830475	1.05297	0.832692	0.951458	up	64324, 9324	0.937734	HMGN3, NSD1
1658	GO:0042625	ATPase coupled ion transmembrane transporter activity	GOMF	49	0.00804223	1.05125	0.765871	0.927779	up	10476, 513, 516, 517, 539	0.907131	ATP5F1D, ATP5MC2, ATP5MC1, ATP5PD, ATP5PO
1631	GO:0052689	carboxylic ester hydrolase activity	GOMF	70	0.00789769	1.05031	0.727183	0.913963	up	10005, 11145, 25796, 5446, 92715, 9563	0.897196	H6PD, ACOT8, PON3, PGLS, DPH7, PLAAT3
1641	GO:0044325	ion channel binding	GOMF	64	0.00783135	1.04987	0.740775	0.92049	up	10142, 10519, 2273, 29085, 5589, 5621, 6281, 808, 857	0.900322	FHL1, PHPT1, CAV1, AKAP9, PRKCSH, CALM3, PRNP, CIB1, S100A10
1650	GO:0019888	protein phosphatase regulator activity	GOMF	57	0.00782751	1.04985	0.754924	0.924809	up	23645, 5502, 808, 94274, 9749	0.903537	PPP1R15A, PHACTR2, PPP1R1A, CALM3, PPP1R14A
1671	GO:0019205	nucleobase-containing compound kinase activity	GOMF	41	0.00732607	1.04658	0.804533	0.939329	up	1716, 2987, 4830, 4832, 54963	0.924135	NME3, DGUOK, GUK1, UCKL1, NME1
1656	GO:0031072	heat shock protein binding	GOMF	64	0.00717324	1.04559	0.762521	0.926298	up	10273, 11140, 3303, 3304, 3654, 51501, 55869, 55898, 6188, 7538, 84223	0.905175	STUB1, CDC37, IQCG, ZFP36, UNC45A, HDAC8, HIKESHI, RPS3, IRAK1, HSPA1B, HSPA1A
1645	GO:0035326	enhancer binding	GOMF	76	0.007095	1.04508	0.744933	0.921352	up	170302, 2626, 3015, 3725, 4779, 53615, 60, 7494	0.900322	ARX, MBD3, ACTB, NFE2L1, XBP1, GATA4, H2AFZ, JUN
1713	GO:0043621	protein self-association	GOMF	31	0.00686483	1.04359	0.840408	0.951458	up	7128, 79188	0.939072	TNFAIP3, TMEM43
1606	GO:0005516	calmodulin binding	GOMF	128	0.00664242	1.04214	0.694108	0.906399	up	1265, 1612, 165, 4082, 4627, 4638, 5530, 65108, 6711, 800, 84223, 8536, 8721	0.887193	CNN2, MYLK, MYH9, AEBP1, EDF1, IQCG, SPTBN1, CALD1, CAMK1, PPP3CA, MARCKSL1, DAPK1, MARCKS
1627	GO:0060090	binding, bridging	GOMF	115	0.0063574	1.0403	0.721364	0.913768	up	10133, 10273, 10399, 1175, 1278, 23363, 23468, 2621, 3667, 5781, 6451, 6624, 857	0.897196	AP2S1, FSCN1, CBX5, STUB1, CAV1, OPTN, OBSL1, SH3BGRL, COL1A2, IRS1, PTPN11, GAS6, RACK1
1716	GO:0051287	NAD binding	GOMF	37	0.00604889	1.03831	0.846875	0.951458	up	1727, 3030, 3945	0.939573	HADHA, CYB5R3, LDHB
1672	GO:0019208	phosphatase regulator activity	GOMF	66	0.00578756	1.03662	0.805602	0.939329	up	23645, 4660, 5502, 808, 94274, 9749	0.924135	PPP1R12B, PPP1R15A, PHACTR2, PPP1R1A, CALM3, PPP1R14A
1726	GO:0004521	endoribonuclease activity	GOMF	43	0.00482263	1.03042	0.868891	0.960026	up	440400, 6038	0.956715	RNASEK, RNASE4
1750	GO:0001098	basal transcription machinery binding	GOMF	28	0.00397921	1.02504	0.912709	0.978867	up	2067, 2091	0.983448	ERCC1, FBL
1751	GO:0001099	basal RNA polymerase II transcription machinery binding	GOMF	28	0.00397921	1.02504	0.912709	0.978867	up	2067, 2091	0.983448	ERCC1, FBL
1618	GO:0019904	protein domain specific binding	GOMF	424	0.00355886	1.02236	0.70958	0.910472	up	10273, 10370, 10399, 1611, 1649, 1809, 1822, 203068, 2067, 23559, 2934, 3303, 3304, 351, 3611, 3643, 3667, 3725, 4627, 468, 51186, 5577, 5605, 5781, 581, 6430, 644150, 6451, 7049, 7094, 7846, 79921, 808, 8364, 85012, 90843, 93343, 9338, 9454, 9516	0.892764	PRKAR2B, ERCC1, HOMER3, TGFBR3, BAX, MYH9, SRSF5, STUB1, ATN1, DAP, DPYSL3, WIPF3, MAP2K2, ATF4, SH3BGRL, TCEAL4, TLN1, MVB12A, APP, GSN, CALM3, CITED2, ILK, TUBA1A, IRS1, INSR, TCEAL1, DDIT3, JUN, PTPN11, TCEAL8, TCEAL9, LITAF, TUBB, TCEAL3, HIST1H4C, HSPA1B, HSPA1A, RACK1, WBP1
1771	GO:0016303	1-phosphatidylinositol-3-kinase activity	GOMF	20	0.00343758	1.02159	0.936323	0.980844	up	3667, 5781	0.985239	IRS1, PTPN11
1744	GO:0019213	deacetylase activity	GOMF	48	0.00341855	1.02147	0.9022	0.976169	up	10362, 3340, 53615, 55869, 83933	0.981373	HMG20B, NDST1, MBD3, HDAC10, HDAC8
1592	GO:0042802	identical protein binding	GOMF	625	0.00331523	1.02082	0.677443	0.903603	up	10133, 10273, 10399, 10404, 1051, 10518, 1052, 10549, 10567, 10848, 11315, 126393, 1277, 1278, 128240, 1471, 1612, 199731, 2192, 2316, 23345, 23468, 2512, 286257, 29082, 2946, 2948, 307, 348, 351, 3572, 3654, 3725, 3945, 3956, 4129, 4297, 4357, 4627, 4830, 5010, 5018, 5052, 5092, 51150, 51282, 5351, 5446, 5621, 567, 57175, 57659, 581, 60, 6129, 6223, 6277, 6281, 6723, 684, 7057, 7431, 80024, 8027…	0.886995	HSPB6, CLDN11, CD74, VIM, MAOB, MAP3K13, ACTB, FBLN1, SDF4, PLOD1, FTL, BAX, SLC8B1, CBX5, LGALS1, MYH9, HM13, CST3, STUB1, CPQ, PPP1R13L, RPS19, RABAC1, CADM4, PON3, CAV1, COL1A1, LDHB, PARK7, SRM, PRDX1, KMT2A, PRDX4, OPTN, TRIP10, MPST, APOE, BST2, SYNE1, IL6ST, CIB2, THBS1, APP, RPL7, PAXX, OXA1L, SCUBE1, NAXE, COL1A2, PCBD1, B2M, GSTM4, SCAND1, PRNP, CEBPB, CORO1B, ZBTB4, PHYKPL, JUN, SHARPI…
1754	GO:0030145	manganese ion binding	GOMF	37	0.00318216	1.01997	0.920032	0.978867	up	10423, 79716	0.983448	CDIPT, NPEPL1
1662	GO:0000981	RNA polymerase II transcription factor activity, sequence-specific DNA binding	GOMF	386	0.00272394	1.01707	0.785826	0.939329	up	10194, 10488, 1051, 1052, 1649, 165, 170302, 1958, 2114, 2353, 2354, 23764, 26137, 2626, 2627, 285550, 3164, 3725, 3726, 3727, 389524, 4094, 468, 4692, 4779, 4781, 4782, 4784, 5178, 57616, 57659, 64651, 64710, 65982, 6659, 7494, 7832, 9203, 9314	0.923916	ARX, NFIX, NUCKS1, NFE2L1, XBP1, AEBP1, CREB3, EGR1, TSHZ3, ZSCAN18, NR4A1, SOX4, FOSB, ATF4, JUND, GATA4, KLF4, GATA6, NFIC, CSRNP1, ZMYM3, NFIB, ETS2, BTG2, FOS, JUNB, CEBPB, ZBTB4, GTF2IRD2B, DDIT3, JUN, MAF, TSHZ1, ZBTB20, NDN, MAFF, PEG3, CEBPD, FAM200B
1700	GO:0000978	RNA polymerase II core promoter proximal region sequence-specific DNA binding	GOMF	212	0.00257045	1.0161	0.847907	0.951458	up	10488, 1051, 1052, 1649, 170959, 199777, 2114, 2353, 2354, 3015, 3725, 3726, 3727, 468, 4692, 4781, 4782, 53615, 55422, 60	0.939573	MBD3, ACTB, CREB3, FOSB, ATF4, JUND, ZNF331, NFIC, NFIB, ETS2, H2AFZ, FOS, JUNB, CEBPB, DDIT3, JUN, NDN, ZNF626, ZNF431, CEBPD
1719	GO:0000982	transcription factor activity, RNA polymerase II core promoter proximal region sequence-specific binding	GOMF	202	0.00250134	1.01567	0.8554	0.951627	up	10194, 10488, 1051, 1052, 1649, 1958, 2114, 2353, 2354, 26137, 3164, 3725, 3726, 468, 4692, 4781, 4782, 57616, 64710, 6659, 7832, 9314	0.943951	NUCKS1, CREB3, EGR1, TSHZ3, NR4A1, SOX4, FOSB, ATF4, KLF4, NFIC, NFIB, ETS2, BTG2, FOS, JUNB, CEBPB, DDIT3, JUN, TSHZ1, ZBTB20, NDN, CEBPD
1756	GO:0031406	carboxylic acid binding	GOMF	78	0.00218455	1.01367	0.920781	0.978867	up	23564, 3482, 445, 5066, 5351, 5730, 79701	0.983448	PLOD1, PTGDS, ASS1, PAM, OGFOD3, IGF2R, DDAH2
1786	GO:0001103	RNA polymerase II repressing transcription factor binding	GOMF	27	0.00193332	1.01209	0.958628	0.984674	up	123016, 2627	0.986094	GATA6, TTC8
1696	GO:0098772	molecular function regulator	GOMF	805	0.00158611	1.00991	0.824156	0.948269	up	100134934, 10142, 1019, 10399, 10519, 11135, 11140, 11142, 11315, 124857, 1293, 1471, 1634, 163590, 200734, 207, 216, 2192, 23102, 23258, 23640, 23645, 23741, 25824, 25894, 2621, 27018, 285016, 28951, 29085, 302, 307, 308, 348, 351, 3667, 3718, 3725, 4660, 4684, 4947, 5037, 5159, 5270, 54453, 55004, 5502, 5577, 5605, 5660, 56925, 57018, 5720, 5721, 58485, 6001, 6050, 6176, 6711, 6764, 684, 7076, …	0.932417	CFLAR, PRKAR2B, DCN, RNH1, TIMP2, PHPT1, TRIB2, PPP1R12B, FBLN1, LXN, PPP1R15A, PEBP1, PSME1, TIMP3, PSME2, CST3, TIMP1, TBC1D17, CDC37, JAK3, CAV1, SH3PXD2A, ARHGEF17, PHACTR2, PDGFRB, SPTBN1, PARK7, C3, TRIP10, PRDX5, MAP2K2, AKAP9, CDC42EP1, APOE, BST2, RIN2, HSPBP1, CDK4, PPP1R1A, SERPINE2, KLF4, DPM2, RPLP1, APP, AKT1, SH3BGRL3, RGS10, SERPING1, SERPINH1, NCAM1, LAMTOR1, CALM3, COL6A3, CCNL1…
1781	GO:0016810	hydrolase activity, acting on carbon-nitrogen (but not peptide) bonds	GOMF	91	0.00118407	1.00739	0.953784	0.984202	up	10362, 125061, 1635, 1808, 1809, 23564, 3340, 53615, 55869, 83933	0.986094	HMG20B, NDST1, MBD3, DPYSL2, HDAC10, DPYSL3, DCTD, HDAC8, AFMID, DDAH2
1793	GO:0016776	phosphotransferase activity, phosphate group as acceptor	GOMF	31	0.00105376	1.00657	0.975919	0.995346	up	10654, 2987, 4830, 4832	0.996054	NME3, GUK1, PMVK, NME1
1796	GO:0004520	endodeoxyribonuclease activity	GOMF	42	0.00069486	1.00433	0.981553	0.996753	up	2067, 6188	0.996054	ERCC1, RPS3
1799	GO:0031593	polyubiquitin binding	GOMF	38	0.000625778	1.0039	0.984198	0.996787	up	10133, 51035, 7128, 7353, 81858	0.996054	UFD1, TNFAIP3, OPTN, UBXN1, SHARPIN
1795	GO:0001047	core promoter binding	GOMF	117	0.000411087	1.00256	0.981877	0.996753	up	1051, 170959, 2353, 2627, 3015, 4297, 468, 55011, 64324, 6659, 7494, 9314	0.996054	XBP1, PIH1D1, KMT2A, SOX4, ATF4, KLF4, GATA6, H2AFZ, NSD1, FOS, CEBPB, ZNF431
1803	GO:0035591	signaling adaptor activity	GOMF	52	0.000320164	1.00199	0.99056	0.998586	up	10399, 3667, 5781, 6451	0.99805	SH3BGRL, IRS1, PTPN11, RACK1
1805	GO:0016893	endonuclease activity, active with either ribo- or deoxyribonucleic acids and producing 5'-phosphomonoesters	GOMF	32	0.00029592	1.00184	0.993149	0.999764	up		0.998218
1809	GO:0031369	translation initiation factor binding	GOMF	29	4.68189e-06	1.00003	0.999897	1	up	1978, 6229, 8663, 8665	0.999897	RPS24, EIF3F, EIF3C, EIF4EBP1
1808	GO:0004519	endonuclease activity	GOMF	92	-5.20473e-05	0.999677	0.997966	1	down	10111, 10146, 146956, 1763, 201164, 23144, 246243, 28987, 51692, 5423, 55247, 5888, 5889, 5890, 5932, 60528, 65080, 7247, 7516, 80153, 8930	0.999842	ELAC2, ZC3H3, RAD51, POLB, RBBP8, RAD51C, NEIL3, RAD50, CPSF3, MBD4, MRPL44, DNA2, NOB1, G3BP1, EME1, RNASEH1, EDC3, PLD6, RAD51B, XRCC2, TSN
1804	GO:0008170	N-methyltransferase activity	GOMF	70	-0.000162027	0.998994	0.994472	0.999764	down	10919, 11091, 2146, 27292, 4221, 51531, 54093, 54496, 5929, 64216, 64754, 7468, 79723, 79813, 83852, 84193	0.998218	DIMT1, EZH2, NSD2, RBBP5, PRMT7, MEN1, SETDB2, TRMO, SUV39H2, TFB2M, EHMT1, SETD3, SMYD3, SETD4, WDR5, EHMT2
1800	GO:0001012	RNA polymerase II regulatory region DNA binding	GOMF	361	-0.000178211	0.998893	0.986407	0.99699	down	10153, 10172, 1025, 1054, 10620, 10771, 10793, 11179, 138151, 152518, 2004, 2120, 2146, 219736, 22926, 23528, 23613, 2551, 2625, 2649, 3087, 3183, 3204, 3298, 343472, 3659, 3670, 3720, 4084, 4087, 430, 4335, 4488, 4520, 4605, 4772, 4773, 4775, 4802, 5015, 51176, 5308, 5469, 54807, 54815, 54993, 571, 57459, 5915, 5928, 5977, 6304, 64376, 64641, 64754, 6497, 6615, 6721, 6772, 6908, 6910, 6926, 6936…	0.996054	GCFC2, ZNF195, JARID2, TFAP2B, ZMYND11, ISL1, HSF2, MXD1, NFYC, MNT, NFATC3, RARB, ZNF586, TFAP2C, KDM2B, TBX5, HNRNPC, IKZF5, ZMYND8, MYBL2, NFATC2, EZH2, GATA3, MLX, ELK3, TBP, STAT1, CEBPZ, ATF6, MSX2, NR2C1, HOXA7, SNAI1, IRF1, MED1, NR1D1, NFATC1, DPF2, CLOCK, TBX3, ACTL6A, CDK9, LEF1, ETV6, BARHL2, GATAD2B, NR6A1, NACC2, ZNF256, HHEX, CEBPG, GABPA, BACH1, PCGF6, ZIC3, SKI, RBBP4, ZNF281, PI…
1794	GO:0000977	RNA polymerase II regulatory region sequence-specific DNA binding	GOMF	360	-0.000255031	0.998416	0.98058	0.996753	down	10153, 10172, 1025, 1054, 10620, 10771, 10793, 11179, 138151, 152518, 2004, 2120, 2146, 219736, 22926, 23528, 23613, 2551, 2625, 2649, 3087, 3183, 3204, 3298, 343472, 3659, 3670, 3720, 4084, 4087, 430, 4335, 4488, 4520, 4605, 4772, 4773, 4775, 4802, 5015, 51176, 5308, 5469, 54807, 54815, 54993, 571, 57459, 5915, 5928, 5977, 6304, 64376, 64641, 64754, 6497, 6615, 6721, 6772, 6908, 6910, 6926, 6936…	0.996054	GCFC2, ZNF195, JARID2, TFAP2B, ZMYND11, ISL1, HSF2, MXD1, NFYC, MNT, NFATC3, RARB, ZNF586, TFAP2C, KDM2B, TBX5, HNRNPC, IKZF5, ZMYND8, MYBL2, NFATC2, EZH2, GATA3, MLX, ELK3, TBP, STAT1, CEBPZ, ATF6, MSX2, NR2C1, HOXA7, SNAI1, IRF1, MED1, NR1D1, NFATC1, DPF2, CLOCK, TBX3, ACTL6A, CDK9, LEF1, ETV6, BARHL2, GATAD2B, NR6A1, NACC2, ZNF256, HHEX, CEBPG, GABPA, BACH1, PCGF6, ZIC3, SKI, RBBP4, ZNF281, PI…
1802	GO:0048029	monosaccharide binding	GOMF	28	-0.000615655	0.996181	0.98671	0.99699	down	10584, 22934, 29988, 64841, 6518, 7360, 81035	0.996054	GNPNAT1, SLC2A8, SLC2A5, RPIA, COLEC12, UGP2, COLEC10
1788	GO:0022890	inorganic cation transmembrane transporter activity	GOMF	244	-0.000632103	0.996079	0.960192	0.984674	down	11141, 123606, 201780, 206358, 22821, 23630, 245973, 25800, 26133, 27032, 342372, 3710, 3756, 3763, 3781, 3782, 3790, 481, 486, 51305, 51606, 526, 528, 535, 54503, 54716, 54805, 55799, 5663, 56660, 57030, 57181, 57185, 57192, 57338, 57380, 57582, 59341, 64849, 6546, 7225, 775, 80333, 81614, 84102, 84701, 90550, 9107, 9152, 9254, 93380, 9497, 9550, 9914	0.986094	NIPAL3, CACNA2D2, ATP2C1, ATP6V0A1, SLC4A7, ATP6V1H, ATP2C2, KCNN2, PSEN1, MCOLN1, ITPR3, TRPC4AP, SLC17A7, KCNT1, TRPV4, SLC36A1, MRS2, COX4I2, SLC41A2, ATP6V1G1, TRPC6, FXYD2, MTMR6, NIPA2, SLC39A6, ATP1B1, KCNH1, KCNN3, ATP6V1C2, SLC10A4, ATP6V1B2, CNNM2, CACNA1C, JPH3, ATP6V1C1, MCU, CACNA2D3, KCNJ6, SLC13A3, SLC6A20, SLC6A5, IL1RAPL1, KCNK9, MMGT1, NIPA1, KCNS3, KCNE5, ZDHHC13, SLC8A1, KCNK1…
1798	GO:0005548	phospholipid transporter activity	GOMF	27	-0.000796637	0.995061	0.983124	0.996787	down	10396, 121601, 23120, 286410, 51012, 5244	0.996054	ABCB4, PRELID3B, ATP11C, ATP10B, ATP8A1, ANO4
1776	GO:0003714	transcription corepressor activity	GOMF	162	-0.00105263	0.99348	0.945854	0.982712	down	10514, 10771, 1488, 1789, 2004, 221895, 22938, 23528, 23613, 25942, 29117, 4084, 4335, 4601, 473, 4863, 5074, 51053, 51132, 51460, 51567, 51588, 51616, 5932, 6497, 7021, 7068, 708, 7088, 7091, 7529, 7536, 79718, 84962, 8554, 862, 863, 9425, 9572, 9734	0.986094	TFAP2B, ZMYND11, PIAS1, HDAC9, MXD1, MNT, RUNX1T1, DNMT3B, SNW1, ZMYND8, RBBP8, PIAS4, TLE4, C1QBP, ELK3, TDP2, GMNN, MXI1, NR1D1, AJUBA, CBFA2T3, RLIM, MYBBP1A, RERE, NPAT, THRB, CDYL, JAZF1, SKI, ZNF281, SFMBT1, BRD7, YWHAB, SF1, SIN3A, CTBP2, PAWR, TBL1XR1, TAF9B, TLE1
1775	GO:0016741	transferase activity, transferring one-carbon groups	GOMF	174	-0.00107511	0.993341	0.942724	0.982193	down	10919, 11091, 113802, 114049, 123263, 138199, 154743, 1786, 1788, 1789, 2146, 221078, 23463, 2618, 27292, 4221, 5110, 51451, 51531, 54093, 54482, 54496, 54931, 55006, 56980, 57570, 5929, 64216, 6472, 64754, 7298, 7468, 79723, 79813, 83852, 84193, 8623, 96764	0.985239	BUD23, DIMT1, DNMT3B, MTFMT, EZH2, NSD2, ICMT, RBBP5, DNMT3A, PCMT1, TRMT13, TRMT5, DNMT1, PRMT7, MEN1, SETDB2, TRMO, TGS1, SUV39H2, CARNMT1, GART, HENMT1, TFB2M, BMT2, ASMTL, PRDM10, TRMT61B, TRMT10C, TYMS, EHMT1, SHMT2, SETD3, SMYD3, SETD4, WDR5, EHMT2, LCMT1, NSUN6
1791	GO:0003727	single-stranded RNA binding	GOMF	57	-0.00109884	0.993194	0.966279	0.987828	down	11338, 1653, 219988, 23586, 26065, 3183, 3185, 3192, 51001, 54033, 55342, 5725, 57332, 6434, 7458, 79132, 79882, 8087, 9271, 9361	0.990436	PTBP1, U2AF2, DDX1, HNRNPC, ZC3H14, EIF4H, DDX58, DHX58, FXR1, PIWIL1, TRA2B, CBX8, HNRNPU, MTERF3, STRBP, PATL1, HNRNPF, RBM11, LONP1, LSM14A
1761	GO:0001159	core promoter proximal region DNA binding	GOMF	225	-0.00112979	0.993003	0.931784	0.979777	down	10153, 1054, 10620, 10793, 138151, 2004, 2120, 23528, 2551, 2625, 2649, 29128, 3087, 3183, 3204, 3659, 3670, 4084, 4087, 430, 4520, 4605, 4773, 4775, 4802, 5015, 51176, 5308, 5469, 57459, 5928, 5977, 63946, 63948, 63951, 64641, 6497, 6721, 6772, 6908, 6926, 6936, 7181, 7547, 7589, 7643, 7748, 7764, 83881, 86, 9572, 9575	0.983448	GCFC2, ZNF195, ISL1, MXD1, NFYC, NFATC3, HNRNPC, MYBL2, NFATC2, GATA3, ELK3, TBP, STAT1, CEBPZ, NR2C1, HOXA7, IRF1, MED1, NR1D1, DPF2, CLOCK, TBX3, ACTL6A, LEF1, ETV6, DMRTC2, DMRTB1, GATAD2B, NR6A1, NACC2, HHEX, CEBPG, GABPA, ZIC3, SKI, RBBP4, ZNF281, PITX2, OTX2, ZSCAN21, ZNF217, SMAD2, DMRTA1, ARID3B, ASCL2, MIXL1, MTF1, ZNF273, SREBF2, ZNF90, EBF2, UHRF1
1779	GO:0008757	S-adenosylmethionine-dependent methyltransferase activity	GOMF	116	-0.00118451	0.992666	0.948339	0.983337	down	10919, 11091, 138199, 154743, 1786, 1788, 1789, 2146, 221078, 23463, 27292, 4221, 5110, 51451, 51531, 54093, 54496, 54931, 55006, 57570, 5929, 64216, 64754, 7468, 79723, 79813, 83852, 84193	0.986094	DIMT1, DNMT3B, EZH2, NSD2, ICMT, RBBP5, DNMT3A, PCMT1, TRMT5, DNMT1, PRMT7, MEN1, SETDB2, TRMO, SUV39H2, CARNMT1, TFB2M, BMT2, TRMT61B, TRMT10C, EHMT1, SETD3, SMYD3, SETD4, WDR5, EHMT2, LCMT1, NSUN6
1760	GO:0000987	core promoter proximal region sequence-specific DNA binding	GOMF	224	-0.00126892	0.992145	0.923612	0.979777	down	10153, 1054, 10620, 10793, 138151, 2004, 2120, 23528, 2551, 2625, 2649, 29128, 3087, 3183, 3204, 3659, 3670, 4084, 4087, 430, 4520, 4605, 4773, 4775, 4802, 5015, 51176, 5308, 5469, 57459, 5928, 5977, 63946, 63948, 63951, 64641, 6497, 6721, 6772, 6908, 6926, 6936, 7181, 7547, 7589, 7643, 7748, 7764, 83881, 86, 9572, 9575	0.983448	GCFC2, ZNF195, ISL1, MXD1, NFYC, NFATC3, HNRNPC, MYBL2, NFATC2, GATA3, ELK3, TBP, STAT1, CEBPZ, NR2C1, HOXA7, IRF1, MED1, NR1D1, DPF2, CLOCK, TBX3, ACTL6A, LEF1, ETV6, DMRTC2, DMRTB1, GATAD2B, NR6A1, NACC2, HHEX, CEBPG, GABPA, ZIC3, SKI, RBBP4, ZNF281, PITX2, OTX2, ZSCAN21, ZNF217, SMAD2, DMRTA1, ARID3B, ASCL2, MIXL1, MTF1, ZNF273, SREBF2, ZNF90, EBF2, UHRF1
1784	GO:0022853	active ion transmembrane transporter activity	GOMF	61	-0.00142543	0.991181	0.954823	0.984202	down	10257, 10396, 245973, 27032, 481, 486, 51606, 526, 528, 535, 57030, 64849, 9497, 9550, 9914	0.986094	ATP2C1, ATP6V0A1, SLC4A7, ATP6V1H, ATP2C2, SLC17A7, ATP8A1, ABCC4, ATP6V1G1, FXYD2, ATP1B1, ATP6V1C2, ATP6V1B2, ATP6V1C1, SLC13A3
1782	GO:0017048	Rho GTPase binding	GOMF	65	-0.00151415	0.990634	0.950487	0.984202	down	11113, 1613, 1730, 1894, 23002, 23191, 23500, 29091, 4688, 4952, 55763, 55920, 57522, 6792, 7074, 81624, 8826, 8936, 9732	0.986094	CDKL5, EXOC1, DAAM1, WASF1, ECT2, NCF2, OCRL, CIT, DOCK4, DIAPH3, IQGAP1, DAAM2, DIAPH2, TIAM1, DAPK3, STXBP6, RCC2, SRGAP1, CYFIP1
1764	GO:0016829	lyase activity	GOMF	113	-0.00172208	0.989355	0.92606	0.979777	down	109, 111, 115, 201562, 2235, 2271, 23761, 2571, 262, 3052, 3295, 38, 4200, 48, 4953, 51074, 5423, 55034, 55247, 59344, 6472, 771, 80146, 80896, 8879, 952	0.983448	CD38, HCCS, FECH, POLB, CA12, ACAT1, MOCOS, ME2, FH, NEIL3, UXS1, ODC1, ACO1, AMD1, GAD1, HSD17B4, NPL, ADCY3, APIP, ADCY9, SGPL1, ADCY5, ALOXE3, SHMT2, HACD2, PISD
1747	GO:0016757	transferase activity, transferring glycosyl groups	GOMF	154	-0.00182948	0.988695	0.908597	0.977022	down	10190, 10678, 11282, 11320, 114805, 142, 146664, 148789, 2527, 2530, 2992, 3074, 5082, 5277, 5279, 53947, 5471, 54956, 64131, 64761, 79369, 79691, 79796, 79868, 8706, 90693, 9334	0.983448	FUT8, HEXB, PARP12, MGAT4A, ALG9, ALG13, XYLT1, TXNDC9, PPAT, A4GALT, FUT5, PIGC, PDCL, PARP16, PARP1, GALNT13, QTRT2, B4GALT5, MGAT4B, B3GALNT2, GYG1, PIGA, MGAT5B, CCDC126, B3GALNT1, B3GNT2, B3GNT4
1770	GO:0005244	voltage-gated ion channel activity	GOMF	62	-0.00190782	0.988214	0.939178	0.980844	down	11141, 1183, 23630, 25932, 3756, 3763, 3790, 51305, 55799, 56660, 57582, 7416, 775, 80333, 9254	0.985239	CACNA2D2, CLCN4, KCNT1, KCNH1, CACNA1C, CACNA2D3, KCNJ6, IL1RAPL1, KCNK9, CLIC4, KCNS3, KCNE5, KCNK12, KCNIP4, VDAC1
1772	GO:0022832	voltage-gated channel activity	GOMF	62	-0.00190782	0.988214	0.939178	0.980844	down	11141, 1183, 23630, 25932, 3756, 3763, 3790, 51305, 55799, 56660, 57582, 7416, 775, 80333, 9254	0.985239	CACNA2D2, CLCN4, KCNT1, KCNH1, CACNA1C, CACNA2D3, KCNJ6, IL1RAPL1, KCNK9, CLIC4, KCNS3, KCNE5, KCNK12, KCNIP4, VDAC1
1790	GO:0046934	phosphatidylinositol-4,5-bisphosphate 3-kinase activity	GOMF	23	-0.00211278	0.986956	0.958903	0.984674	down	145957, 2066, 2534, 3815, 5293, 5295	0.986094	FYN, PIK3R1, KIT, NRG4, PIK3CD, ERBB4
1767	GO:0051536	iron-sulfur cluster binding	GOMF	58	-0.0022312	0.98623	0.931287	0.979777	down	1663, 1763, 2235, 23479, 27247, 317671, 48, 5422, 5471, 54901, 5558, 83990, 9054	0.983448	DDX11, FECH, POLA1, ACO1, PPAT, ISCU, BRIP1, DNA2, CDKAL1, PRIM2, NFU1, RFESD, NFS1
1768	GO:0051540	metal cluster binding	GOMF	58	-0.0022312	0.98623	0.931287	0.979777	down	1663, 1763, 2235, 23479, 27247, 317671, 48, 5422, 5471, 54901, 5558, 83990, 9054	0.983448	DDX11, FECH, POLA1, ACO1, PPAT, ISCU, BRIP1, DNA2, CDKAL1, PRIM2, NFU1, RFESD, NFS1
1780	GO:0000062	fatty-acyl-CoA binding	GOMF	22	-0.00251155	0.984513	0.952295	0.984202	down	11332, 2108, 6646, 84129	0.986094	SOAT1, ACOT7, ETFA, ACAD11
1728	GO:0008168	methyltransferase activity	GOMF	164	-0.00252377	0.984438	0.870557	0.960026	down	10919, 11091, 113802, 114049, 138199, 154743, 1786, 1788, 1789, 2146, 221078, 23463, 27292, 4221, 5110, 51451, 51531, 54093, 54482, 54496, 54931, 55006, 56980, 57570, 5929, 64216, 64754, 7298, 7468, 79723, 79813, 83852, 84193, 8623, 96764	0.956715	BUD23, DIMT1, DNMT3B, EZH2, NSD2, ICMT, RBBP5, DNMT3A, PCMT1, TRMT13, TRMT5, DNMT1, PRMT7, MEN1, SETDB2, TRMO, TGS1, SUV39H2, CARNMT1, HENMT1, TFB2M, BMT2, ASMTL, PRDM10, TRMT61B, TRMT10C, TYMS, EHMT1, SETD3, SMYD3, SETD4, WDR5, EHMT2, LCMT1, NSUN6
1774	GO:0004896	cytokine receptor activity	GOMF	24	-0.00297696	0.981669	0.941054	0.981627	down	1232, 1240, 1438, 2674, 2675, 3597	0.985239	IL13RA1, GFRA1, GFRA2, CMKLR1, CCR3, CSF2RA
1746	GO:0004536	deoxyribonuclease activity	GOMF	57	-0.00301959	0.981409	0.90816	0.977022	down	10111, 146956, 1763, 5423, 55247, 5810, 5888, 5889, 5890, 5932, 7516, 8930, 92667	0.983448	RAD51, POLB, RBBP8, RAD51C, NEIL3, RAD1, RAD50, MGME1, MBD4, DNA2, EME1, RAD51B, XRCC2
1738	GO:0005200	structural constituent of cytoskeleton	GOMF	76	-0.00310606	0.980882	0.891144	0.971198	down	10096, 10097, 10426, 10880, 120, 1496, 1756, 2037, 23136, 257019, 27229, 347688, 4741, 4744, 4747, 5357, 57669, 7277, 8030, 8089, 84790, 84978, 9118	0.971329	CTNNA2, EPB41L2, EPB41L3, NEFH, NEFM, CCDC6, ACTR3, EPB41L5, PLS1, TUBGCP3, YEATS4, TUBA4A, TUBGCP4, ACTR2, ACTL7B, ADD3, INA, TUBA1C, FRMD5, FRMD3, DMD, TUBB8, NEFL
1752	GO:0001190	transcriptional activator activity, RNA polymerase II transcription factor binding	GOMF	38	-0.00315879	0.980561	0.921473	0.978867	down	11060, 116931, 3670, 473, 51741, 5308, 57496, 57591, 6595, 7021, 83881, 9575	0.983448	TFAP2B, ISL1, SMARCA2, CLOCK, RERE, MED12L, PITX2, MIXL1, WWOX, MRTFB, MRTFA, WWP2
1759	GO:0098811	transcriptional repressor activity, RNA polymerase II activating transcription factor binding	GOMF	38	-0.00315879	0.980561	0.921473	0.978867	down	11060, 116931, 3670, 473, 51741, 5308, 57496, 57591, 6595, 7021, 83881, 9575	0.983448	TFAP2B, ISL1, SMARCA2, CLOCK, RERE, MED12L, PITX2, MIXL1, WWOX, MRTFB, MRTFA, WWP2
1721	GO:0016758	transferase activity, transferring hexosyl groups	GOMF	114	-0.00341322	0.979012	0.854306	0.951627	down	10678, 11282, 11320, 114805, 146664, 148789, 2527, 2530, 2992, 3074, 5277, 5279, 53947, 64131, 79369, 79796, 79868, 8706, 90693, 9334	0.943951	FUT8, HEXB, MGAT4A, ALG9, ALG13, XYLT1, A4GALT, FUT5, PIGC, GALNT13, B4GALT5, MGAT4B, B3GALNT2, GYG1, PIGA, MGAT5B, CCDC126, B3GALNT1, B3GNT2, B3GNT4
1766	GO:0016891	endoribonuclease activity, producing 5'-phosphomonoesters	GOMF	25	-0.00345638	0.978749	0.930301	0.979777	down	246243, 65080, 80153	0.983448	MRPL44, RNASEH1, EDC3
1755	GO:0030515	snoRNA binding	GOMF	28	-0.00368102	0.977384	0.921551	0.978867	down	1736, 26747, 27042, 55127, 55720	0.983448	NUFIP1, UTP25, HEATR1, DKC1, TSR1
1735	GO:0020037	heme binding	GOMF	47	-0.00416734	0.974434	0.885457	0.968886	down	10424, 1580, 55640, 571, 57404, 79152, 80777, 9572	0.967108	CYB5B, FA2H, CYP20A1, FLVCR2, NR1D1, CYP4B1, BACH1, PGRMC2
1587	GO:0042803	protein homodimerization activity	GOMF	419	-0.0043421	0.973376	0.660254	0.887471	down	10015, 10017, 10059, 1012, 10125, 1054, 10562, 10951, 11051, 11332, 1139, 138151, 1436, 1488, 153090, 1613, 1894, 1994, 201164, 2066, 23236, 23705, 25801, 26127, 2643, 2649, 2898, 2958, 29959, 3074, 3087, 3157, 3295, 3298, 3397, 3416, 3417, 348093, 3612, 3728, 374986, 3781, 38, 3815, 4085, 4087, 4257, 4281, 4436, 4591, 4953, 5048, 5049, 51100, 51305, 51429, 54033, 54982, 54997, 5596, 55975, 5631,…	0.871078	PAFAH1B1, TFAP2B, MGST1, HSF2, RABEP1, CUL3, USH2A, HEXB, ELAVL1, GOLGA5, CAMK2A, ACTN1, ACAT1, TPD52, KCNN2, MTMR2, DNM1L, TESC, MSH2, ACOT7, SH3GLB1, HPS4, MID1, EEA1, OLFM4, RNF40, HOMER2, BNIP3L, TRIM37, CBX1, MLX, GRPEL1, TIMELESS, FGFR1OP2, RNF8, HMGCS1, TARS, ECT2, FXR1, NRBP1, GCA, STAT1, UXS1, ODC1, KYNU, ABCD3, VPS4B, IDE, NR2C1, MTERF2, KLHL7, LRRFIP1, ID1, CLN6, SNX6, SNX9, RAB11FIP4,…
1602	GO:0008047	enzyme activator activity	GOMF	307	-0.00455338	0.972099	0.6917	0.905381	down	10040, 10049, 10054, 10055, 10059, 10144, 10197, 1027, 10451, 10531, 10598, 10845, 11033, 1124, 115703, 1163, 116987, 153090, 1793, 1794, 1894, 22821, 23108, 23216, 23236, 23779, 253260, 25780, 25782, 26230, 26286, 26577, 2665, 29127, 2978, 3268, 375, 3993, 400, 4253, 481, 4824, 4943, 4952, 5062, 51422, 5170, 51719, 54828, 54956, 55114, 55357, 55531, 55633, 5581, 5604, 57521, 57522, 57580, 5997, …	0.886995	ARHGAP33, RABEP1, GUCA1A, GDI2, TBC1D22B, TBC1D1, TBC1D25, ARHGAP10, LLGL2, SMAP2, DNM1L, TBC1D2, TBC1D10A, AHSA1, ANKRD27, ADAP1, DNAJB6, CHN2, AGFG2, PRKAG2, PITRM1, MADD, ELMOD1, CDKN1B, SMAP1, ECT2, RGS2, RAB3GAP2, ARL1, DEPDC7, TBC1D15, OCRL, PREX1, GTF3C4, UBA2, DOCK4, TBC1D5, PSME3, RAP1GAP2, VAV3, DOCK2, CAB39, DAB2IP, PARP16, FAM13A, GIT2, BNIP2, IQGAP1, ARHGAP17, PDPK1, TOM1L1, BCAS3, R…
1507	GO:0044877	macromolecular complex binding	GOMF	899	-0.0047411	0.970966	0.493604	0.756917	down	10036, 10096, 10097, 1012, 1015, 1025, 1027, 1058, 10580, 10771, 10891, 10919, 10951, 11034, 11128, 116138, 127933, 128553, 132243, 147179, 148479, 1488, 1495, 1496, 1499, 1515, 151963, 153090, 163, 1653, 1786, 1788, 1789, 1794, 1796, 199953, 201973, 2146, 2185, 219402, 2209, 222229, 22796, 22801, 22849, 22907, 22937, 23026, 23028, 23054, 23125, 23133, 23149, 23191, 23314, 23510, 23613, 23636, 24…	0.72677	KRIT1, KDM1A, AP2B1, PAFAH1B1, JARID2, TFAP2B, BAZ1B, FYN, ZMYND11, ISL1, MSR1, SPDL1, MYO16, USH2A, CTNNA1, LIMA1, RAD51, RNF4, GNAI3, CTNNA2, SMARCD1, PFKP, MNT, RAD18, NCK2, WDR1, ACTN1, SMC1A, TP63, NSF, RARB, TOP2B, UBE2T, CDH17, CARMIL1, DDX1, SMARCA2, GRHL2, TDRD3, ORC1, GNA11, DNMT3B, ICAM1, HNRNPC, EZR, CDC45, MSH2, SORBS1, WAC, HSP90AB1, VRK1, SRP54, ZMYND8, NFATC2, PRPF6, USP14, POLA1,…
1734	GO:0015297	antiporter activity	GOMF	38	-0.00474367	0.97095	0.882964	0.967373	down	11136, 116369, 1183, 23428, 23657, 284129, 54020, 6546, 9056	0.966365	SLC7A9, CLCN4, SLC7A8, SLC26A8, SLC7A11, SLC7A7, SLC37A1, SLC26A11, SLC8A1
1704	GO:0016798	hydrolase activity, acting on glycosyl bonds	GOMF	64	-0.00484131	0.970361	0.845626	0.951458	down	10309, 2517, 2720, 3074, 5111, 55247, 55347, 60495, 7374, 79411, 8930, 952	0.939573	CD38, HEXB, UNG, NEIL3, MBD4, PCNA, ABHD10, CCNO, GLB1L, GLB1, HPSE2, FUCA1
1567	GO:0000976	transcription regulatory region sequence-specific DNA binding	GOMF	427	-0.00502085	0.969279	0.608762	0.841638	down	10153, 10172, 1025, 1054, 10620, 10771, 10793, 11179, 138151, 1407, 148523, 152518, 2004, 2100, 2120, 2146, 219736, 22926, 23064, 23528, 23613, 2551, 25942, 2625, 2649, 29128, 3087, 3183, 3204, 3298, 343472, 3659, 3670, 3720, 406, 4084, 4087, 430, 4335, 4488, 4520, 4605, 4772, 4773, 4775, 4802, 4824, 5015, 51176, 5308, 5469, 54700, 54807, 54815, 54937, 54993, 55818, 571, 57459, 57591, 57597, 5915…	0.831975	GCFC2, ZNF195, JARID2, TFAP2B, CRY1, ZMYND11, ISL1, HSF2, MXD1, NFYC, MNT, NFATC3, RARB, ZNF586, RRN3, TFAP2C, KDM2B, TBX5, HNRNPC, IKZF5, ZMYND8, MYBL2, NFATC2, EZH2, SETX, GATA3, MLX, ELK3, TBP, STAT1, KDM3A, CEBPZ, ATF6, MSX2, SOHLH2, NR2C1, HOXA7, SNAI1, IRF1, MED1, NR1D1, NFATC1, ARNTL, DPF2, CLOCK, TBX3, ACTL6A, CDK9, LEF1, ETV6, ESR2, USP3, DMRTC2, DMRTB1, LMO4, BARHL2, GATAD2B, NR6A1, NAC…
1703	GO:0016247	channel regulator activity	GOMF	62	-0.00517259	0.968366	0.837965	0.951458	down	1139, 1739, 1804, 23327, 23630, 27075, 2822, 3790, 486, 55013, 55799, 5592, 57463, 57628, 5774, 7533, 80333, 9369	0.939072	MCUB, NRXN3, NEDD4L, PTPN3, DLG1, TSPAN13, GPLD1, YWHAH, DPP6, FXYD2, CACNA2D3, KCNS3, CHRNA7, DPP10, KCNE5, AMIGO1, PRKG1, KCNIP4
1637	GO:0003729	mRNA binding	GOMF	148	-0.00556559	0.966003	0.735308	0.917554	down	10146, 10643, 10658, 10921, 11051, 11052, 127933, 1429, 149041, 1618, 1993, 1994, 22849, 23034, 27303, 29894, 3183, 348093, 48, 5073, 5093, 51247, 54715, 54845, 55095, 55124, 55421, 55544, 56254, 56478, 57510, 58155, 5936, 6434, 64506, 708, 7247, 7298, 7884, 79048, 80153, 8087, 9271, 92906, 9810	0.900322	SAMD4A, ELAVL1, CPSF1, NCBP3, RBFOX1, HNRNPC, DAZL, RNF40, ESRP1, ELAVL2, CPEB3, C1QBP, CPSF6, FXR1, CRYZ, PTBP2, PAIP2, ACO1, XPO5, PIWIL1, RBM38, RC3H1, IGF2BP3, TRA2B, PARN, HNRNPLL, RBMS3, G3BP1, CELF1, UHMK1, RNF20, SLBP, RBPMS2, NUDT21, PCBP1, RBM4, TYMS, SAMD4B, EDC3, EIF4ENIF1, SECISBP2, PIWIL2, RNPS1, TSN, CPEB1
1730	GO:0016409	palmitoyltransferase activity	GOMF	28	-0.00602637	0.963241	0.872944	0.961231	down	51125, 54503, 55625, 55733, 84243, 9227	0.957364	HHAT, LRAT, GOLGA7, ZDHHC7, ZDHHC13, ZDHHC18
1687	GO:0016811	hydrolase activity, acting on carbon-nitrogen (but not peptide) bonds, in linear amides	GOMF	62	-0.00616853	0.962391	0.807968	0.939573	down	10003, 123803, 138151, 23028, 25942, 27165, 51733, 55768, 5928, 5931, 64426, 9734	0.924135	KDM1A, HDAC9, NAALAD2, UPB1, RBBP7, SUDS3, GLS2, NACC2, NGLY1, NTAN1, RBBP4, SIN3A
1694	GO:0031491	nucleosome binding	GOMF	47	-0.00649807	0.960422	0.823664	0.948269	down	1058, 132243, 29128, 3151, 3183, 57459, 5928, 6047, 7443, 86	0.932417	RNF4, HNRNPC, VRK1, CENPA, ACTL6A, GATAD2B, RBBP4, H1FOO, HMGN2, UHRF1
1706	GO:0016879	ligase activity, forming carbon-nitrogen bonds	GOMF	40	-0.00662791	0.959647	0.833933	0.951458	down	159, 2618, 2730, 31, 4522, 5095, 57494, 9654	0.937734	GCLM, ADSS, MTHFD1, TTLL4, GART, RIMKLB, PCCA, ACACA
1504	GO:0019900	kinase binding	GOMF	442	-0.00676663	0.95882	0.485574	0.748558	down	10040, 10112, 1020, 10783, 10935, 11190, 1163, 117584, 117854, 128344, 1407, 142, 143384, 1499, 151195, 153090, 161, 1636, 1739, 1740, 1869, 1994, 2181, 2185, 22974, 22995, 2305, 2475, 253260, 25780, 25793, 25843, 25930, 26060, 27347, 2801, 285489, 2886, 29127, 2931, 2932, 29979, 3091, 3326, 3728, 3756, 3832, 387778, 3991, 4436, 4744, 4772, 4905, 5062, 5073, 51094, 5111, 51422, 51444, 5170, 51719…	0.71892	CRY1, RB1CC1, VRK2, GAB2, WWC3, HDAC9, PER3, ELMO2, SNAP91, PPP2R5A, ELAVL1, MAPK6, CDC42, NSF, DLG1, PTPN23, MAP2K7, TOP2B, LIPE, GSK3B, AURKA, TPX2, EZR, RFFL, CDC6, MSH2, HSP90AB1, MAPK1, FBXO7, NEFH, HIF1A, VRK1, E2F1, POLA1, ARHGEF7, DNAJA3, CEP152, GSK3A, TAX1BP1, PRKAG2, C1QBP, PRKAR1A, TRPV4, FOXM1, PRKAB1, KIF20A, PRKAR2A, MOB4, CCND2, NEK6, PTK2B, TRIM6, ACSL3, SNAI1, PIWIL1, CEP250, DO…
1683	GO:0046906	tetrapyrrole binding	GOMF	53	-0.00691724	0.957923	0.80145	0.939329	down	10424, 1580, 55640, 55788, 571, 57404, 79152, 80777, 9572	0.924135	CYB5B, FA2H, CYP20A1, FLVCR2, NR1D1, CYP4B1, BACH1, PGRMC2, LMBRD1
1413	GO:0001071	nucleic acid binding transcription factor activity	GOMF	733	-0.00737156	0.955222	0.336054	0.611506	down	10153, 10172, 10308, 10363, 10389, 1054, 10620, 10745, 11143, 121274, 124535, 125893, 128553, 138151, 1389, 140883, 1499, 152518, 152687, 162966, 1750, 1869, 1879, 2004, 2034, 2100, 2120, 22926, 23028, 2305, 23125, 23528, 23650, 2551, 2553, 25942, 2625, 2649, 27097, 27164, 29128, 29883, 3087, 3091, 3204, 3298, 3394, 3397, 343472, 3659, 3664, 3670, 3720, 387332, 406, 4084, 4087, 4299, 430, 4306, 4…	0.577671	KDM1A, GCFC2, DLX6, GAS7, JARID2, TFAP2B, ZNF207, ZNF200, ISL1, HSF2, SCML1, MXD1, GPBP1, RNF4, NFYC, MNT, ZXDC, NFATC3, TP63, ZNF532, RARB, RUNX1T1, TCF7, GRHL2, ZNF586, TFAP2C, TBX5, IKZF5, HIF1A, MYBL2, NFATC2, SALL4, E2F1, SCML2, TSC22D1, GABPB1, TLE4, GATA3, CAMTA2, MLX, CSRNP2, ELK3, FOXM1, CREBL2, NR2E1, TBP, STAT1, KDM3A, CEBPZ, EPAS1, PHTF1, ZBTB17, BLZF1, IRF6, ATF6, KLF7, TGIF2, MSX2, …
1415	GO:0003700	transcription factor activity, sequence-specific DNA binding	GOMF	733	-0.00737156	0.955222	0.336054	0.611506	down	10153, 10172, 10308, 10363, 10389, 1054, 10620, 10745, 11143, 121274, 124535, 125893, 128553, 138151, 1389, 140883, 1499, 152518, 152687, 162966, 1750, 1869, 1879, 2004, 2034, 2100, 2120, 22926, 23028, 2305, 23125, 23528, 23650, 2551, 2553, 25942, 2625, 2649, 27097, 27164, 29128, 29883, 3087, 3091, 3204, 3298, 3394, 3397, 343472, 3659, 3664, 3670, 3720, 387332, 406, 4084, 4087, 4299, 430, 4306, 4…	0.577671	KDM1A, GCFC2, DLX6, GAS7, JARID2, TFAP2B, ZNF207, ZNF200, ISL1, HSF2, SCML1, MXD1, GPBP1, RNF4, NFYC, MNT, ZXDC, NFATC3, TP63, ZNF532, RARB, RUNX1T1, TCF7, GRHL2, ZNF586, TFAP2C, TBX5, IKZF5, HIF1A, MYBL2, NFATC2, SALL4, E2F1, SCML2, TSC22D1, GABPB1, TLE4, GATA3, CAMTA2, MLX, CSRNP2, ELK3, FOXM1, CREBL2, NR2E1, TBP, STAT1, KDM3A, CEBPZ, EPAS1, PHTF1, ZBTB17, BLZF1, IRF6, ATF6, KLF7, TGIF2, MSX2, …
1643	GO:0015399	primary active transmembrane transporter activity	GOMF	71	-0.00764146	0.953621	0.748569	0.921352	down	10257, 10396, 22, 245973, 27032, 481, 486, 51382, 51606, 5244, 526, 528, 535, 5825, 5826, 64241, 9550, 9804, 9914	0.900322	ABCB4, ATP2C1, ATP6V0A1, ATP6V1H, ATP2C2, ATP6V1D, ABCD3, ABCD4, ATP8A1, ABCC4, ABCB7, ATP6V1G1, FXYD2, ATP1B1, ATP6V1C2, ABCG8, ATP6V1B2, ATP6V1C1, TOMM20
1644	GO:0015405	P-P-bond-hydrolysis-driven transmembrane transporter activity	GOMF	71	-0.00764146	0.953621	0.748569	0.921352	down	10257, 10396, 22, 245973, 27032, 481, 486, 51382, 51606, 5244, 526, 528, 535, 5825, 5826, 64241, 9550, 9804, 9914	0.900322	ABCB4, ATP2C1, ATP6V0A1, ATP6V1H, ATP2C2, ATP6V1D, ABCD3, ABCD4, ATP8A1, ABCC4, ABCB7, ATP6V1G1, FXYD2, ATP1B1, ATP6V1C2, ABCG8, ATP6V1B2, ATP6V1C1, TOMM20
1710	GO:0035004	phosphatidylinositol 3-kinase activity	GOMF	28	-0.0076818	0.953382	0.839345	0.951458	down	145957, 2066, 2534, 3815, 5289, 5293, 5295	0.939072	FYN, PIK3C3, PIK3R1, KIT, NRG4, PIK3CD, ERBB4
1642	GO:0008276	protein methyltransferase activity	GOMF	69	-0.00770692	0.953233	0.749987	0.921352	down	10919, 11091, 2146, 23463, 4221, 5110, 51451, 54093, 54496, 5929, 64754, 7468, 79723, 79813, 83852, 84193	0.900322	EZH2, NSD2, ICMT, RBBP5, PCMT1, PRMT7, MEN1, SETDB2, SUV39H2, EHMT1, SETD3, SMYD3, SETD4, WDR5, EHMT2, LCMT1
1518	GO:0008324	cation transmembrane transporter activity	GOMF	286	-0.00776396	0.952896	0.517945	0.775226	down	10396, 11141, 1136, 1138, 1139, 114134, 121260, 123606, 201780, 206358, 22821, 23428, 23630, 245973, 25800, 26133, 27032, 29988, 342372, 3710, 3756, 3763, 3781, 3782, 3790, 481, 486, 51305, 51458, 51606, 526, 528, 535, 54503, 54716, 54805, 55799, 5663, 56660, 57030, 57181, 57185, 57192, 57338, 57380, 57582, 59341, 64849, 6546, 6582, 7225, 7355, 775, 80333, 81614, 84102, 84701, 85414, 90550, 9107,…	0.754275	NIPAL3, CACNA2D2, ATP2C1, ATP6V0A1, SLC4A7, ATP6V1H, ATP2C2, CHRNA3, KCNN2, PSEN1, MCOLN1, SLC7A8, ITPR3, TRPC4AP, SLC35A2, SLC17A7, KCNT1, TRPV4, SLC22A2, SLC36A1, ATP8A1, MRS2, COX4I2, SLC41A2, SLC2A8, ATP6V1G1, TRPC6, FXYD2, SLC15A4, MTMR6, NIPA2, RHCG, SLC39A6, ATP1B1, KCNH1, KCNN3, ATP6V1C2, SLC10A4, ATP6V1B2, CNNM2, CACNA1C, SLC2A13, JPH3, ATP6V1C1, MCU, CACNA2D3, KCNJ6, SLC13A3, SLC45A3, S…
1492	GO:0015075	ion transmembrane transporter activity	GOMF	372	-0.00777899	0.952807	0.461969	0.727623	down	10052, 10227, 10257, 10396, 11141, 1136, 1138, 1139, 114134, 116369, 1183, 119559, 121260, 121601, 123606, 1739, 201780, 206358, 2185, 22821, 23428, 23630, 23657, 245973, 2567, 2568, 25800, 25932, 26133, 27032, 2742, 28231, 28232, 28234, 284129, 2890, 2895, 2898, 2900, 2904, 29988, 342372, 3710, 3756, 3763, 3781, 3782, 3790, 481, 486, 51305, 51458, 51606, 526, 528, 535, 54020, 54503, 54716, 54805…	0.699516	NIPAL3, CACNA2D2, ATP2C1, ATP6V0A1, SLC4A7, ATP6V1H, ATP2C2, CLCN4, DLG1, CHRNA3, KCNN2, PSEN1, MCOLN1, SLC7A8, GABRP, ITPR3, TRPC4AP, SLCO4A1, GLRA2, SLC35A2, NCALD, SLC17A7, KCNT1, MFSD10, TRPV4, SLCO1B3, SLC26A8, SLC22A2, PTK2B, SLC36A1, ATP8A1, MRS2, ABCC4, COX4I2, SLC41A2, LRRC8A, SLC2A8, ATP6V1G1, TRPC6, FXYD2, SLC15A4, MTMR6, NIPA2, RHCG, SLC39A6, TTYH2, ATP1B1, KCNH1, KCNN3, ATP6V1C2, CAL…
1676	GO:0033613	activating transcription factor binding	GOMF	39	-0.00800698	0.951458	0.803377	0.939329	down	1499, 25942, 3670, 4087, 5308, 5393, 56919, 6880, 6926, 7466, 84193	0.924135	DHX33, ISL1, WFS1, EXOSC9, TBX3, PITX2, CTNNB1, SIN3A, SMAD2, SETD3, TAF9
1424	GO:0008092	cytoskeletal protein binding	GOMF	589	-0.00804566	0.951229	0.344024	0.614912	down	10059, 10096, 10097, 10112, 10160, 1020, 10300, 10426, 10458, 10580, 10783, 10808, 10891, 10982, 11004, 11034, 11104, 11252, 11345, 116154, 120, 124602, 128344, 129446, 140735, 147179, 1495, 1496, 157922, 158297, 164, 1730, 1739, 1756, 199953, 2009, 2037, 220134, 221692, 22920, 22924, 22948, 22989, 23002, 23026, 23136, 2314, 23172, 23191, 23207, 23500, 23636, 24137, 2534, 257019, 25924, 26052, 26…	0.58211	KRIT1, RALA, BAIAP2L1, PAFAH1B1, MYLIP, ZNF207, FYN, ANLN, BRCA1, GABARAPL2, RAB27B, MYO16, USH2A, CTNNA1, OFD1, LIMA1, CTNNA2, EML1, RAB27A, PFN2, PTPN3, POLB, NCK2, WDR1, ACTN1, DLG1, KIFAP3, KLHL20, KIF22, EPB41L2, KCNN2, EPB41L3, KIF3C, MAPRE3, DNM1L, PHACTR3, KIF9, SNX5, KIF4A, EZR, SORBS1, PACSIN2, NEFH, DAAM1, RAE1, MID1, RAB11A, HOMER2, VPS18, NCALD, NEFM, RAB3D, CCSER2, PPARGC1A, TRPV4, …
1664	GO:0004407	histone deacetylase activity	GOMF	39	-0.00813269	0.950714	0.800434	0.939329	down	138151, 23028, 25942, 5928, 5931, 64426, 9734	0.924135	KDM1A, HDAC9, RBBP7, SUDS3, NACC2, RBBP4, SIN3A
1675	GO:0033558	protein deacetylase activity	GOMF	39	-0.00813269	0.950714	0.800434	0.939329	down	138151, 23028, 25942, 5928, 5931, 64426, 9734	0.924135	KDM1A, HDAC9, RBBP7, SUDS3, NACC2, RBBP4, SIN3A
1705	GO:0016866	intramolecular transferase activity	GOMF	24	-0.00814559	0.950638	0.842428	0.951458	down	1736, 669, 84881	0.93936	DKC1, RPUSD4, BPGM
1620	GO:0051082	unfolded protein binding	GOMF	84	-0.00816422	0.950528	0.710191	0.910472	down	10036, 10049, 10294, 10471, 10576, 10694, 10728, 10845, 10939, 22937, 22948, 3301, 3313, 3326, 4676, 51726, 55664, 56605, 7265, 80273, 8208, 84447, 9093, 9804	0.892764	DNAJA2, DNAJA1, ERO1B, DNAJB11, HSP90AB1, DNAJA3, DNAJB6, CDC37L1, GRPEL1, PTGES3, HSPA9, TTC1, SCAP, AFG3L2, CCT5, CCT8, CHAF1B, SYVN1, CCT2, CLPX, CHAF1A, TOMM20, PFDN6, NAP1L4
1612	GO:0017124	SH3 domain binding	GOMF	81	-0.00867189	0.947534	0.698738	0.908786	down	10040, 10314, 11113, 140885, 153090, 1793, 22941, 2530, 27124, 30011, 342184, 51517, 55114, 55740, 63916, 7408, 8030, 83699, 83992, 9232, 9467, 9732, 9844	0.888835	FUT8, ELMO2, CTTNBP2, CCDC6, LANCL1, CIT, VASP, DOCK4, SH3BP5, DAB2IP, ARHGAP17, TOM1L1, SH3KBP1, DOCK1, ENAH, ELMO1, SHANK2, PTTG1, INPP5J, SIRPA, SH3BGRL2, NCKIPSD, FMN1
1452	GO:0019901	protein kinase binding	GOMF	397	-0.00867346	0.947525	0.398716	0.672368	down	10040, 10112, 1020, 10783, 10935, 11190, 1163, 117584, 117854, 128344, 1407, 142, 143384, 1499, 151195, 153090, 161, 1636, 1739, 1869, 1994, 2181, 2185, 22974, 22995, 2305, 2475, 253260, 25793, 25930, 26060, 27347, 2801, 285489, 2886, 29127, 2931, 2932, 3091, 3326, 3728, 3756, 3832, 387778, 3991, 4436, 4744, 4772, 4905, 5062, 5073, 51094, 5111, 51422, 51444, 5170, 5295, 5347, 5422, 5501, 5564, 55…	0.642656	CRY1, RB1CC1, VRK2, GAB2, HDAC9, ELMO2, SNAP91, ELAVL1, MAPK6, CDC42, NSF, DLG1, PTPN23, MAP2K7, TOP2B, LIPE, GSK3B, AURKA, TPX2, EZR, RFFL, MSH2, HSP90AB1, MAPK1, FBXO7, NEFH, HIF1A, VRK1, E2F1, POLA1, ARHGEF7, DNAJA3, CEP152, GSK3A, PRKAG2, C1QBP, PRKAR1A, TRPV4, FOXM1, PRKAB1, KIF20A, PRKAR2A, CCND2, NEK6, PTK2B, TRIM6, ACSL3, PIWIL1, CEP250, DOCK4, NFATC1, TRAF3, TOP2A, PCNA, CCNB1, RNF138, U…
1695	GO:0052813	phosphatidylinositol bisphosphate kinase activity	GOMF	26	-0.00880081	0.946775	0.823504	0.948269	down	145957, 2066, 2534, 3815, 5293, 5295, 8395	0.932417	FYN, PIP5K1B, PIK3R1, KIT, NRG4, PIK3CD, ERBB4
1698	GO:0043175	RNA polymerase core enzyme binding	GOMF	23	-0.00925169	0.944126	0.825705	0.948402	down	51322, 64754, 79577	0.932417	WAC, CDC73, SMYD3
1605	GO:0043492	ATPase activity, coupled to movement of substances	GOMF	74	-0.00929203	0.943889	0.692289	0.905381	down	10257, 10396, 22, 23120, 245973, 27032, 286410, 481, 486, 51382, 51606, 5244, 526, 528, 535, 5825, 5826, 64241, 9550, 9914	0.886995	ABCB4, ATP2C1, ATP6V0A1, ATP6V1H, ATP2C2, ATP6V1D, ATP11C, ABCD3, ATP10B, ABCD4, ATP8A1, ABCC4, ABCB7, ATP6V1G1, FXYD2, ATP1B1, ATP6V1C2, ABCG8, ATP6V1B2, ATP6V1C1
1646	GO:0042054	histone methyltransferase activity	GOMF	49	-0.00932221	0.943712	0.746389	0.921352	down	10919, 11091, 2146, 4221, 54496, 5929, 64754, 7468, 79723, 79813, 83852, 84193	0.900322	EZH2, NSD2, RBBP5, PRMT7, MEN1, SETDB2, SUV39H2, EHMT1, SETD3, SMYD3, WDR5, EHMT2
1563	GO:0050662	coenzyme binding	GOMF	128	-0.00943542	0.943049	0.598275	0.833757	down	11062, 11332, 142, 1429, 1488, 1718, 2108, 221656, 23028, 25821, 2643, 2936, 3417, 3418, 3419, 38, 4200, 4967, 51004, 51741, 5447, 57553, 6389, 6646, 6713, 7296, 80146, 84129, 9131, 92106	0.821858	KDM1A, SOAT1, SDHA, ACAT1, ME2, ACOT7, SQLE, GSR, DUS4L, OGDH, UXS1, DHCR24, CRYZ, COQ6, POR, GCH1, MTO1, IDH1, ETFA, PARP1, OXNAD1, AIFM1, KDM1B, IDH3A, CTBP2, IDH2, WWOX, TXNRD1, ACAD11, MICAL3
1593	GO:0031490	chromatin DNA binding	GOMF	70	-0.0100212	0.939622	0.678682	0.903851	down	1058, 10891, 132243, 2146, 3151, 3183, 5308, 5469, 55818, 57459, 5928, 7068, 79977, 86, 9575	0.886995	GRHL2, HNRNPC, EZH2, PPARGC1A, CENPA, KDM3A, MED1, CLOCK, ACTL6A, GATAD2B, THRB, RBBP4, PITX2, H1FOO, HMGN2
1394	GO:1990837	sequence-specific double-stranded DNA binding	GOMF	454	-0.010083	0.939261	0.297467	0.569437	down	10153, 10172, 1025, 1054, 1058, 10620, 10771, 10793, 11004, 11179, 138151, 1407, 148523, 152518, 2004, 2100, 2120, 2146, 219736, 22926, 23064, 23528, 23594, 23613, 2475, 2551, 25942, 2625, 2649, 29128, 3087, 3183, 3204, 3298, 343472, 3659, 3670, 3720, 406, 4084, 4087, 4171, 430, 4335, 4436, 4488, 4520, 4605, 4772, 4773, 4775, 4802, 4824, 4999, 5000, 5001, 5015, 51176, 5308, 5469, 54700, 54807, 54…	0.546724	DHX33, GCFC2, ZNF195, JARID2, TFAP2B, CRY1, ZMYND11, ISL1, HSF2, MXD1, NFYC, MNT, NFATC3, MCM2, RARB, ZNF586, RRN3, TFAP2C, KDM2B, TBX5, ORC6, HNRNPC, CDC45, MSH2, IKZF5, ZMYND8, MYBL2, NFATC2, EZH2, SETX, GATA3, MLX, ELK3, TBP, CENPA, STAT1, KDM3A, CEBPZ, ORC2, ORC4, ATF6, MSX2, SOHLH2, NR2C1, HOXA7, SNAI1, IRF1, MED1, NR1D1, MBD4, NFATC1, ARNTL, DPF2, CLOCK, TBX3, ACTL6A, CDK9, LEF1, ETV6, ESR2…
1603	GO:0016820	hydrolase activity, acting on acid anhydrides, catalyzing transmembrane movement of substances	GOMF	64	-0.0100957	0.939187	0.689806	0.905381	down	10257, 10396, 22, 245973, 27032, 481, 486, 51382, 51606, 5244, 526, 528, 535, 5825, 5826, 64241, 9550, 9914	0.886995	ABCB4, ATP2C1, ATP6V0A1, ATP6V1H, ATP2C2, ATP6V1D, ABCD3, ABCD4, ATP8A1, ABCC4, ABCB7, ATP6V1G1, FXYD2, ATP1B1, ATP6V1C2, ABCG8, ATP6V1B2, ATP6V1C1
1604	GO:0042626	ATPase activity, coupled to transmembrane movement of substances	GOMF	64	-0.0100957	0.939187	0.689806	0.905381	down	10257, 10396, 22, 245973, 27032, 481, 486, 51382, 51606, 5244, 526, 528, 535, 5825, 5826, 64241, 9550, 9914	0.886995	ABCB4, ATP2C1, ATP6V0A1, ATP6V1H, ATP2C2, ATP6V1D, ABCD3, ABCD4, ATP8A1, ABCC4, ABCB7, ATP6V1G1, FXYD2, ATP1B1, ATP6V1C2, ABCG8, ATP6V1B2, ATP6V1C1
1285	GO:0046914	transition metal ion binding	GOMF	904	-0.0101781	0.938706	0.147007	0.370067	down	100, 10072, 10125, 10314, 10336, 10425, 10483, 10531, 10569, 10600, 10612, 10771, 10802, 10868, 10919, 10939, 10946, 11083, 11143, 11177, 113878, 115426, 117584, 117854, 140831, 142, 1429, 148479, 149041, 152006, 152518, 1580, 1636, 1638, 167227, 170261, 170691, 1756, 1786, 1911, 200424, 201973, 2100, 221656, 221687, 222484, 2235, 23032, 23133, 23295, 23479, 23586, 23609, 23613, 23650, 246, 248, …	0.339198	ZNF195, MYLIP, BAZ1B, ZNF207, BRCA1, UBR7, RNF14, ZMYND11, ISL1, ZRANB1, RNF10, PIAS1, LMO3, LIMA1, UNKL, RNF4, FECH, RAD18, LNX1, CHFR, CA12, MOCOS, MKRN2, RARB, USP33, PIAS2, DCT, CNOT4, TRAF5, WDFY1, ZFAND6, PPEF1, OGFOD1, KDM2B, BRAP, DTX2, RFFL, ZNF184, PPM1A, ZMYND8, DIDO1, SEC23B, SAMHD1, MID1, PHEX, EEA1, JADE3, MGRN1, FA2H, RNF40, CALB1, PIAS4, CBLL1, LHX2, DDX58, GATA3, PITRM1, TRIM37, …
1684	GO:0050661	NADP binding	GOMF	30	-0.0102879	0.938066	0.780483	0.939329	down	1429, 2936, 3417, 5447	0.921853	GSR, CRYZ, POR, IDH1
1586	GO:0005506	iron ion binding	GOMF	75	-0.0103806	0.937525	0.657355	0.88494	down	1580, 200424, 2235, 23133, 23479, 246, 26234, 27247, 5033, 5475, 54790, 55239, 55818, 57404, 59344, 6059, 6309, 79152, 84864	0.869405	FECH, PPEF1, OGFOD1, FA2H, SC5D, KDM3A, FBXL5, CYP20A1, P4HA1, ISCU, CYP4B1, ALOX15, ABCE1, TET2, NFU1, RIOX2, PHF8, ALOXE3, TET3
1691	GO:0016780	phosphotransferase activity, for other substituted phosphate groups	GOMF	20	-0.0107686	0.935268	0.811937	0.940119	down	166929, 201164, 54675, 60496, 9489	0.924928	PGS1, CRLS1, AASDHPPT, SGMS2, PLD6
1678	GO:0036442	hydrogen-exporting ATPase activity	GOMF	23	-0.0110125	0.933851	0.794324	0.939329	down	245973, 51606, 526, 528, 535, 9550	0.924135	ATP6V0A1, ATP6V1H, ATP6V1G1, ATP6V1C2, ATP6V1B2, ATP6V1C1
1377	GO:0003712	transcription cofactor activity	GOMF	413	-0.0110228	0.933791	0.277763	0.552355	down	1022, 10514, 10600, 10771, 10891, 11036, 11319, 116931, 117143, 135112, 1488, 1499, 1653, 1655, 170261, 1789, 2004, 2100, 221895, 22926, 22938, 23028, 23054, 23082, 23426, 23528, 23613, 24148, 2551, 25942, 2625, 26292, 27097, 29117, 2958, 329, 3298, 3670, 3728, 4084, 4335, 4488, 4520, 4601, 473, 4802, 4848, 4863, 5074, 51053, 51132, 51460, 51567, 51586, 51588, 51616, 51741, 5308, 5469, 55578, 558…	0.524992	KDM1A, TFAP2B, BRCA1, RNF14, ZMYND11, ISL1, HSF2, TBPL1, PIAS1, HDAC9, MXD1, RNF4, SMARCD1, NFYC, MNT, TRIP13, ACTN1, PIAS2, RUNX1T1, DDX1, SMARCA2, TDRD3, DNMT3B, MED15, SNW1, TRIP11, ZMYND8, PRPF6, RBBP8, SUPT20H, PIAS4, TLE4, GATA3, C1QBP, DDX5, PPARGC1A, BIRC2, ELK3, CNOT2, TDP2, NCOA7, GMNN, ATF6, KLF7, MXI1, MSX2, ECD, NCOA3, MED20, MED1, NR1D1, AJUBA, CBFA2T3, RLIM, RAN, MYBBP1A, CDK7, TAF…
1633	GO:0030295	protein kinase activator activity	GOMF	40	-0.011059	0.933581	0.730147	0.915047	down	10040, 1163, 4824, 5062, 51422, 51719, 54956, 5604, 57521, 801, 805, 8567, 8826	0.898304	PRKAG2, MADD, CAB39, PARP16, IQGAP1, TOM1L1, RPTOR, CALM2, NKX3-1, MAP2K1, CKS1B, PAK2, CALM1
1668	GO:0016417	S-acyltransferase activity	GOMF	23	-0.0113672	0.931795	0.788078	0.939329	down	51125, 54503, 55625, 84243	0.923916	GOLGA7, ZDHHC7, ZDHHC13, ZDHHC18
1551	GO:0030674	protein binding, bridging	GOMF	99	-0.0117317	0.929687	0.566701	0.806531	down	10111, 10451, 10458, 10580, 11218, 1124, 117854, 1398, 161, 163, 26119, 267, 26747, 2886, 4221, 4744, 4747, 51068, 5295, 54815, 55294, 55691, 55909, 55971, 57521, 57617, 6461, 80115, 8301, 8440, 9046, 9414, 9846	0.799079	AP2B1, BAIAP2L1, GAB2, DDX20, NCK2, PICALM, NUFIP1, SORBS1, NEFH, VPS18, CHN2, SHB, FBXW7, RAD50, TJP2, TRIM6, BAIAP2L2, MEN1, VAV3, RPTOR, GRB7, PIK3R1, BIN3, DOK2, FRMD4A, LDLRAP1, AMFR, CRK, GATAD2A, NMD3, BAIAP2, AP2A2, NEFL
1596	GO:0004620	phospholipase activity	GOMF	46	-0.0121903	0.92704	0.68456	0.904944	down	10434, 10908, 127018, 201164, 23236, 2822, 5048, 5049, 5336, 55512, 55627, 80821, 8398	0.886995	PAFAH1B1, PNPLA6, DDHD1, SMPD3, GPLD1, LYPLA1, SMPD4, LYPLAL1, PAFAH1B2, PLD6, PLCB1, PLA2G6, PLCG2
1544	GO:0004713	protein tyrosine kinase activity	GOMF	98	-0.0123064	0.926372	0.550536	0.792589	down	10420, 11064, 1436, 1438, 145957, 1944, 2046, 2066, 2185, 2534, 26127, 27020, 3815, 4750, 4916, 494551, 5604, 5609, 57410, 640, 7272, 7525, 9031, 9833	0.782495	BAZ1B, FYN, TESK2, EPHA8, MAP2K7, FGFR1OP2, TTK, CNTRL, PTK2B, BLK, NEK1, NTRK3, SCYL1, EFNA3, NPTN, KIT, MELK, MAP2K1, NRG4, YES1, ERBB4, CSF1R, CSF2RA, WEE2
1269	GO:0046983	protein dimerization activity	GOMF	656	-0.0123634	0.926044	0.130992	0.345196	down	10015, 10017, 10051, 10054, 10055, 10059, 1012, 10125, 10300, 10363, 10388, 1054, 10562, 1058, 10592, 10951, 11051, 111, 11104, 11332, 1139, 121551, 121601, 138151, 1436, 1488, 153090, 1613, 1869, 1894, 1994, 201164, 2034, 2054, 2066, 221154, 22926, 23236, 23705, 245973, 2551, 2553, 2571, 25782, 25793, 25801, 26127, 2617, 2625, 2643, 2649, 27131, 2730, 2898, 2958, 29959, 3014, 3074, 3087, 3091, 3…	0.313543	ADIPOR2, PAFAH1B1, TFAP2B, MGST1, GCLM, HSF2, RABEP1, CUL3, USH2A, HEXB, MXD1, ELAVL1, NFYC, GOLGA5, MAPK6, MNT, CAMK2A, ACTN1, SMC1A, ACAT1, TPD52, TOP2B, KCNN2, TXLNG, MTMR2, DNM1L, TFAP2C, KIF9, TESC, SNX5, MSH2, ACOT7, SH3GLB1, HPS4, FBXO7, BIK, HIF1A, E2F1, POLA1, MID1, EEA1, OLFM4, RNF40, HOMER2, GABPB1, BNIP3L, GARS, GATA3, SMC3, TRIM37, CBX1, MLX, GRPEL1, STX2, TIMELESS, FGFR1OP2, RNF8, H…
1368	GO:0008289	lipid binding	GOMF	352	-0.0123745	0.92598	0.261111	0.530135	down	10059, 10125, 10424, 10613, 11033, 11252, 114876, 114883, 114884, 115703, 116987, 127833, 129401, 153090, 161, 2100, 22905, 22937, 23178, 23236, 23636, 23760, 23762, 246, 25780, 26031, 26119, 26750, 27131, 27236, 2733, 285489, 2886, 29091, 29127, 310, 3710, 4306, 4643, 4651, 4864, 51100, 51429, 51760, 5217, 54843, 54874, 54877, 54899, 55204, 55763, 55968, 56270, 56910, 57231, 5728, 5756, 57580, 5…	0.502427	KRIT1, ARHGAP33, GAB2, SOAT1, SNAP91, PFN2, OSBPL3, EPN2, PICALM, CADPS2, STARD7, WDFY1, DNM1L, NSFL1C, SNX5, EXOC1, ITPR3, SH3GLB1, PACSIN2, EEA1, SYT17, CALB1, ADAP1, SH3GL2, ERLIN1, PLEKHA1, GBF1, CYTH1, SNX3, GOLPH3, SNX4, SCAP, PASK, PLEKHA3, OSBPL9, GLE1, LRAT, PREX1, BAIAP2L2, ALDH1A2, SNX6, SNX9, SBF2, CD36, SNX14, DYSF, RPS6KC1, DAB2IP, TLR4, SYTL2, FNBP1L, ANXA7, ESR2, IQGAP1, OSBPL1A, …
1562	GO:0008194	UDP-glycosyltransferase activity	GOMF	75	-0.012469	0.925436	0.596466	0.833757	down	10678, 11282, 11320, 114805, 146664, 148789, 2992, 3074, 5277, 5279, 53947, 64131, 79369, 79868, 8706, 90693, 9334	0.821858	HEXB, MGAT4A, ALG13, XYLT1, A4GALT, PIGC, GALNT13, B4GALT5, MGAT4B, B3GALNT2, GYG1, PIGA, MGAT5B, CCDC126, B3GALNT1, B3GNT2, B3GNT4
1325	GO:0000988	transcription factor activity, protein binding	GOMF	455	-0.0126184	0.924578	0.195097	0.439094	down	1022, 10514, 10600, 10771, 10891, 11036, 11060, 11319, 116931, 117143, 135112, 138151, 1407, 1488, 1499, 1653, 1655, 170261, 1789, 2004, 2100, 221895, 22926, 22938, 23028, 23054, 23082, 23426, 23528, 23613, 24148, 2551, 25942, 2625, 26292, 27097, 29117, 2958, 3091, 329, 3298, 3670, 3728, 4084, 4335, 4488, 4520, 4601, 4605, 4664, 473, 4762, 4802, 4848, 4863, 5074, 51053, 51132, 51460, 51567, 51586…	0.407791	KDM1A, TFAP2B, CRY1, BRCA1, RNF14, ZMYND11, ISL1, HSF2, TBPL1, PIAS1, HDAC9, MXD1, RNF4, SMARCD1, NFYC, MNT, TRIP13, ACTN1, TP63, PIAS2, RUNX1T1, DDX1, SMARCA2, TDRD3, DNMT3B, MED15, SNW1, HIF1A, TRIP11, ZMYND8, MYBL2, PRPF6, RBBP8, SUPT20H, PIAS4, LHX2, TLE4, GATA3, C1QBP, DDX5, PPARGC1A, BIRC2, ELK3, CNOT2, TDP2, NCOA7, GMNN, ATF6, KLF7, MXI1, MSX2, ECD, NCOA3, MED20, MED1, NR1D1, AJUBA, CBFA2T…
1488	GO:0000287	magnesium ion binding	GOMF	145	-0.0127102	0.92405	0.454811	0.721567	down	10396, 10667, 10783, 159, 23120, 246243, 248, 26164, 286410, 3417, 3418, 3419, 3612, 3705, 375, 4436, 494551, 4976, 51567, 51701, 5494, 54997, 5609, 5631, 5728, 60496, 6732, 7153, 79178, 85865, 9252	0.692612	ADSS, MAP2K7, NLK, TESC, MSH2, SRPK1, ITPK1, PPM1A, RPS6KA5, MTG2, ATP11C, GTPBP10, TDP2, ATP10B, NEK6, ATP8A1, TOP2A, IMPA1, IDH1, ARF1, FARS2, PRPS1, AASDHPPT, ALPI, IDH3A, PTEN, RNASEH1, IDH2, OPA1, WEE2, THTPA
1648	GO:0052742	phosphatidylinositol kinase activity	GOMF	26	-0.012727	0.923954	0.749946	0.921352	down	5289, 5293, 5295, 5298, 8395	0.900322	PIK3C3, PIP5K1B, PI4KB, PIK3R1, PIK3CD
1321	GO:0000989	transcription factor activity, transcription factor binding	GOMF	451	-0.0127309	0.923931	0.193158	0.43811	down	1022, 10514, 10600, 10771, 10891, 11036, 11060, 11319, 116931, 117143, 135112, 138151, 1407, 1488, 1499, 1653, 1655, 170261, 1789, 2004, 2100, 221895, 22926, 22938, 23028, 23054, 23082, 23426, 23528, 23613, 24148, 2551, 25942, 2625, 26292, 27097, 29117, 2958, 3091, 329, 3298, 3670, 3728, 4084, 4335, 4488, 4520, 4601, 4605, 4664, 473, 4762, 4802, 4848, 4863, 5074, 51053, 51132, 51460, 51567, 51586…	0.407791	KDM1A, TFAP2B, CRY1, BRCA1, RNF14, ZMYND11, ISL1, HSF2, TBPL1, PIAS1, HDAC9, MXD1, RNF4, SMARCD1, NFYC, MNT, TRIP13, ACTN1, TP63, PIAS2, RUNX1T1, DDX1, SMARCA2, TDRD3, DNMT3B, MED15, SNW1, HIF1A, TRIP11, ZMYND8, MYBL2, PRPF6, RBBP8, SUPT20H, PIAS4, LHX2, TLE4, GATA3, C1QBP, DDX5, PPARGC1A, BIRC2, ELK3, CNOT2, TDP2, NCOA7, GMNN, ATF6, KLF7, MXI1, MSX2, ECD, NCOA3, MED20, MED1, NR1D1, AJUBA, CBFA2T…
1630	GO:0044390	ubiquitin-like protein conjugating enzyme binding	GOMF	31	-0.0127981	0.923546	0.726516	0.913963	down	10425, 255488, 285671, 2898, 51444, 54165, 55905, 7189, 84259, 9604, 9810	0.897196	RNF14, DCUN1D1, RNF40, RNF114, RNF138, RNF144B, DCUN1D5, RNF180, GRIK2, TRAF6, ARIH2
1589	GO:0019209	kinase activator activity	GOMF	45	-0.0130778	0.921942	0.667219	0.894074	down	10040, 1163, 4824, 5062, 51422, 51719, 54956, 5604, 57521, 6453, 801, 805, 8567, 8826	0.878094	PRKAG2, MADD, CAB39, PARP16, IQGAP1, TOM1L1, RPTOR, CALM2, NKX3-1, MAP2K1, CKS1B, PAK2, CALM1, ITSN1
1308	GO:0022891	substrate-specific transmembrane transporter activity	GOMF	448	-0.0132755	0.92081	0.176833	0.417403	down	10052, 1015, 10227, 10237, 10257, 10396, 10560, 10955, 11136, 11141, 11260, 1136, 1138, 1139, 114134, 116369, 1183, 119559, 121260, 121601, 123606, 136306, 146167, 148808, 1497, 153129, 1739, 201780, 2030, 206358, 2185, 222962, 22821, 23428, 23630, 23657, 245973, 2567, 2568, 25800, 25932, 26133, 27032, 2742, 28231, 28232, 28234, 284129, 2890, 2895, 2898, 2900, 2904, 292, 29928, 29988, 342372, 347…	0.386279	NIPAL3, SLC25A5, CACNA2D2, ATP2C1, SLC7A9, ATP6V0A1, SLC4A7, CTNS, ATP6V1H, ATP2C2, CLCN4, DLG1, CDH17, CHRNA3, KCNN2, PSEN1, MCOLN1, SLC7A8, GABRP, ITPR3, TRPC4AP, SLCO4A1, GLRA2, SLC35A2, OCA2, NCALD, SLC17A7, SLC1A5, KCNT1, MFSD10, TRPV4, SLCO1B3, SLC26A8, SLC22A2, SLC29A1, SLC19A2, PTK2B, SLC35B1, SLC36A1, ATP8A1, MRS2, ABCC4, COX4I2, RAN, SERINC3, SLC41A2, LRRC8A, SLC2A8, ATP6V1G1, TRPC6, FX…
1617	GO:0016763	transferase activity, transferring pentosyl groups	GOMF	31	-0.0134906	0.91958	0.712907	0.910472	down	10190, 142, 5082, 5471, 54956, 64131, 64761, 79691	0.894069	PARP12, XYLT1, TXNDC9, PPAT, PDCL, PARP16, PARP1, QTRT2
1582	GO:0015081	sodium ion transmembrane transporter activity	GOMF	51	-0.0135621	0.919171	0.635575	0.860942	down	201780, 481, 486, 54716, 57030, 64849, 6546, 9152, 9497	0.844791	SLC4A7, SLC17A7, FXYD2, ATP1B1, SLC10A4, SLC13A3, SLC6A20, SLC6A5, SLC8A1
1196	GO:0008270	zinc ion binding	GOMF	771	-0.0137769	0.917945	0.0707808	0.241251	down	100, 10072, 10125, 10314, 10336, 10425, 10483, 10531, 10569, 10600, 10612, 10771, 10802, 10868, 10919, 10939, 10946, 11083, 11143, 11177, 113878, 115426, 117584, 117854, 140831, 142, 1429, 148479, 149041, 152006, 152518, 1636, 170261, 170691, 1756, 1786, 1911, 2100, 221656, 221687, 222484, 23032, 23133, 23295, 23586, 23609, 23613, 23650, 248, 255488, 25893, 25924, 25939, 2625, 2643, 2649, 267, 27…	0.219313	ZNF195, MYLIP, BAZ1B, ZNF207, BRCA1, UBR7, RNF14, ZMYND11, ISL1, ZRANB1, RNF10, PIAS1, LMO3, LIMA1, UNKL, RNF4, RAD18, LNX1, CHFR, CA12, MKRN2, RARB, USP33, PIAS2, CNOT4, TRAF5, WDFY1, ZFAND6, KDM2B, BRAP, DTX2, RFFL, ZNF184, ZMYND8, DIDO1, SEC23B, SAMHD1, MID1, PHEX, EEA1, JADE3, MGRN1, RNF40, CALB1, PIAS4, CBLL1, LHX2, DDX58, GATA3, PITRM1, TRIM37, PEX12, DHX58, ZNF330, NEIL3, NSD2, TRIM3, BIRC…
1655	GO:0016922	ligand-dependent nuclear receptor binding	GOMF	20	-0.013955	0.916929	0.760015	0.925463	down	10891, 3670, 5469, 8202	0.905047	ISL1, PPARGC1A, NCOA3, MED1
1564	GO:0051213	dioxygenase activity	GOMF	59	-0.0140617	0.916322	0.597816	0.833757	down	200424, 23133, 246, 5033, 53630, 5447, 54790, 54890, 55239, 55693, 55818, 59344, 84678, 84864	0.821858	OGFOD1, KDM2B, ALKBH5, KDM3A, P4HA1, POR, BCO1, ALOX15, TET2, RIOX2, PHF8, ALOXE3, KDM4D, TET3
1543	GO:0004540	ribonuclease activity	GOMF	76	-0.0141055	0.916072	0.54843	0.790865	down	167227, 201164, 23019, 23144, 246175, 246243, 28987, 29883, 4848, 5073, 51692, 5393, 60528, 65080, 79650, 80153, 9337	0.781586	ELAC2, ZC3H3, USB1, CNOT2, CPSF3, EXOSC9, CNOT1, MRPL44, CNOT6L, PARN, NOB1, CNOT8, RNASEH1, DCP2, EDC3, PLD6, CNOT7
1490	GO:0032182	ubiquitin-like protein binding	GOMF	116	-0.0141424	0.915862	0.458195	0.724298	down	10040, 10600, 1163, 1407, 23172, 23636, 25793, 29979, 329, 337867, 3416, 51720, 54165, 54469, 54764, 54778, 55968, 56852, 5887, 6047, 64771, 7013, 7153, 7319, 7334, 7345, 7347, 7917, 81930, 8315, 83932, 84142, 84259, 8480, 8878, 9184, 92181	0.695778	CRY1, SPRTN, ZRANB1, DCUN1D1, RNF4, RAD18, UBE2A, ZFAND6, UIMC1, NSFL1C, BRAP, FBXO7, RAE1, BIRC2, UCHL3, RAD23B, IDE, KIF18A, TOP2A, UBAC2, UBQLN1, DCUN1D5, TOM1L1, TERF1, UCHL1, BUB3, USP16, RNF111, SQSTM1, ABRAXAS1, ABRAXAS2, UBTD2, CKS1B, UBE2N, ILRUN, BAG6, NUP62
1495	GO:0043566	structure-specific DNA binding	GOMF	101	-0.0148709	0.911725	0.46729	0.732032	down	10111, 1058, 10891, 11168, 132243, 2146, 3149, 3151, 3183, 4221, 4436, 5308, 5469, 55247, 55818, 56852, 57459, 5888, 5889, 5890, 5928, 641, 7068, 7516, 79977, 86, 9361, 9401, 9575	0.703575	HMGB3, RAD51, RAD18, GRHL2, HNRNPC, MSH2, EZH2, RAD51C, NEIL3, PPARGC1A, RAD50, CENPA, KDM3A, MED1, MEN1, CLOCK, ACTL6A, GATAD2B, THRB, RECQL4, RBBP4, PITX2, PSIP1, H1FOO, RAD51B, LONP1, XRCC2, BLM, HMGN2
1240	GO:0044212	transcription regulatory region DNA binding	GOMF	537	-0.0148857	0.911641	0.100317	0.29052	down	10153, 10172, 1025, 10514, 1054, 10620, 10771, 10793, 11179, 138151, 1407, 148523, 1499, 152518, 1869, 2004, 2066, 2100, 2120, 2146, 219736, 22926, 23028, 23064, 23528, 23613, 2475, 2551, 2553, 25942, 2625, 2649, 27164, 29117, 29128, 2959, 3087, 3183, 3192, 3204, 3298, 343472, 3659, 3670, 3720, 406, 4084, 4087, 4221, 430, 4335, 4488, 4520, 4605, 4762, 4772, 4773, 4775, 4802, 4824, 4862, 5015, 510…	0.264698	KDM1A, GCFC2, ZNF195, JARID2, TFAP2B, CRY1, ZNF200, BRCA1, ZMYND11, ISL1, RNF10, HSF2, MXD1, NFYC, MNT, NFATC3, TP63, ZNF532, RARB, SMARCA2, TCF7, GRHL2, ZNF586, RRN3, TFAP2C, KDM2B, TBX5, HNRNPC, IKZF5, ZMYND8, MYBL2, NFATC2, SALL4, E2F1, GABPB1, EZH2, SETX, GATA3, MLX, ELK3, TBP, STAT1, KDM3A, CEBPZ, RBBP5, ATF6, MSX2, SOHLH2, NR2C1, MTERF2, HOXA7, SNAI1, IRF1, TTF1, MED1, NR1D1, NFATC1, MYBBP1…
1422	GO:0048037	cofactor binding	GOMF	176	-0.0149883	0.91106	0.335235	0.611506	down	11062, 11332, 142, 1429, 1488, 1718, 2108, 211, 221656, 23028, 2571, 25821, 2643, 2936, 3417, 3418, 3419, 38, 4200, 47, 4942, 4967, 51004, 51741, 5447, 55034, 57553, 6389, 6472, 6646, 6713, 7296, 7298, 79896, 80146, 84129, 84706, 8879, 8942, 9054, 9131, 92106	0.577671	KDM1A, ALAS1, SOAT1, OAT, SDHA, ACAT1, MOCOS, ME2, ACOT7, SQLE, GSR, DUS4L, OGDH, UXS1, KYNU, DHCR24, CRYZ, COQ6, POR, GAD1, ACLY, GCH1, MTO1, IDH1, ETFA, PARP1, OXNAD1, AIFM1, KDM1B, GPT2, SGPL1, IDH3A, CTBP2, TYMS, IDH2, SHMT2, THNSL1, WWOX, TXNRD1, ACAD11, MICAL3, NFS1
1253	GO:0022857	transmembrane transporter activity	GOMF	475	-0.0150851	0.910512	0.116363	0.320011	down	10052, 1015, 10227, 10237, 10257, 10396, 10560, 10955, 11136, 11141, 11260, 1136, 1138, 1139, 114134, 115286, 116369, 1183, 119559, 121260, 121601, 123606, 136306, 146167, 148808, 1497, 153129, 1739, 201780, 2030, 206358, 2185, 22, 222962, 22821, 23428, 23630, 23657, 245973, 2567, 2568, 25800, 25932, 26133, 27032, 2742, 28231, 28232, 28234, 284129, 2890, 2895, 2898, 2900, 2904, 292, 29928, 29988,…	0.291182	NIPAL3, SLC25A5, ABCB4, CACNA2D2, ATP2C1, SLC7A9, ATP6V0A1, SLC4A7, CTNS, ATP6V1H, ATP2C2, CLCN4, DLG1, CDH17, CHRNA3, KCNN2, PSEN1, MCOLN1, SLC7A8, GABRP, ITPR3, ATP6V1D, TRPC4AP, SLCO4A1, GLRA2, SLC35A2, OCA2, NCALD, SLC17A7, SLC1A5, KCNT1, MFSD10, TRPV4, SLCO1B3, SLC26A8, SLC22A2, SLC29A1, SLC19A2, ABCD3, ABCD4, PTK2B, SLC35B1, SLC36A1, ATP8A1, MRS2, ABCC4, COX4I2, ABCB7, RAN, SERINC3, SLC41A2…
1610	GO:0005547	phosphatidylinositol-3,4,5-trisphosphate binding	GOMF	27	-0.015143	0.910185	0.701139	0.908786	down	11033, 29127, 4651, 8729, 8826, 9846	0.888835	GAB2, ADAP1, GBF1, IQGAP1, MYO10, RACGAP1
1179	GO:0005215	transporter activity	GOMF	662	-0.0152421	0.909624	0.0635937	0.230123	down	10052, 10112, 1015, 10227, 10237, 10257, 10396, 10526, 10560, 10717, 10955, 11001, 11136, 11141, 11252, 11260, 1136, 1138, 1139, 114134, 115286, 116369, 1183, 119559, 121260, 121601, 123606, 129401, 136306, 1434, 146167, 148808, 1497, 153129, 161, 163, 164, 1739, 201780, 2030, 206358, 2185, 22, 222962, 22796, 22821, 23039, 23120, 23214, 23428, 23534, 23630, 23633, 23636, 23657, 245973, 2567, 2568…	0.209242	NIPAL3, SLC25A5, ABCB4, AP2B1, CACNA2D2, ATP2C1, SLC7A9, KPNA6, ATP6V0A1, SLC4A7, CTNS, ATP6V1H, ATP2C2, TNPO3, IPO5, NUP133, VPS35, CLCN4, DLG1, CDH17, CHRNA3, KCNN2, PSEN1, TNPO1, STARD7, MCOLN1, SLC7A8, GABRP, ITPR3, PACSIN2, ATP6V1D, TRPC4AP, PRELID3B, SLCO4A1, GLRA2, ATP11C, SLC35A2, KPNA3, AP3B2, OCA2, NCALD, SLC17A7, SLC1A5, KCNT1, GOSR2, NUP88, MFSD10, TRPV4, NUP107, SLCO1B3, SLC26A8, SLC…
1549	GO:0051087	chaperone binding	GOMF	60	-0.0153111	0.909234	0.563778	0.805001	down	10049, 1027, 10294, 10469, 10471, 10598, 10963, 267, 3301, 4967, 55664, 6903, 80273, 84447, 9532	0.799079	DNAJA2, DNAJA1, AHSA1, TIMM44, OGDH, DNAJB6, CDC37L1, GRPEL1, CDKN1B, BAG2, TBCC, AMFR, SYVN1, STIP1, PFDN6
1231	GO:0003690	double-stranded DNA binding	GOMF	518	-0.0154027	0.908717	0.0950643	0.282065	down	10111, 10153, 10172, 1025, 1054, 1058, 10620, 10771, 10793, 11004, 11179, 138151, 1407, 148523, 1499, 152518, 1663, 2004, 2100, 2120, 2146, 219736, 22926, 23064, 23528, 23586, 23594, 23613, 2475, 2551, 25942, 26065, 2625, 2649, 29128, 3087, 3149, 3183, 3204, 3298, 343472, 3659, 3670, 3720, 406, 4084, 4087, 4171, 4221, 430, 4335, 4436, 4437, 4488, 4520, 4605, 4772, 4773, 4775, 4802, 4824, 4999, 50…	0.256295	DHX33, GCFC2, ZNF195, JARID2, TFAP2B, CRY1, DDX11, ZMYND11, ISL1, HSF2, HMGB3, TDP1, RAD51, MXD1, PMS1, NFYC, MNT, NFATC3, MCM2, TP63, RARB, ZNF586, RRN3, TFAP2C, KDM2B, TBX5, ORC6, HNRNPC, CDC45, MSH2, IKZF5, ZMYND8, MYBL2, NFATC2, EZH2, DDX58, SETX, GATA3, RAD51C, MLX, NEIL3, ELK3, TBP, MSH3, RAD50, CENPA, STAT1, KDM3A, CEBPZ, ORC2, ORC4, ATF6, MSX2, SOHLH2, NR2C1, MTERF2, HOXA7, SNAI1, IRF1, M…
1565	GO:0016278	lysine N-methyltransferase activity	GOMF	48	-0.0154603	0.908391	0.602082	0.837721	down	10919, 11091, 2146, 4221, 54093, 5929, 64754, 7468, 79723, 79813, 83852, 84193	0.82496	EZH2, NSD2, RBBP5, MEN1, SETDB2, SUV39H2, EHMT1, SETD3, SMYD3, SETD4, WDR5, EHMT2
1535	GO:0008013	beta-catenin binding	GOMF	65	-0.0156925	0.907081	0.538556	0.787051	down	116931, 1495, 23189, 23426, 2932, 51176, 5663, 6500, 6932, 79718, 8650, 8945	0.775812	CTNNA1, PSEN1, TCF7, GSK3B, KANK1, SKP1, NUMB, LEF1, MED12L, GRIP1, BTRC, TBL1XR1
1449	GO:0008234	cysteine-type peptidase activity	GOMF	125	-0.0160646	0.904986	0.384426	0.65654	down	10600, 10868, 123228, 1515, 199870, 205564, 23032, 25801, 373509, 51138, 54764, 55593, 57558, 57602, 57695, 726, 7345, 7347, 7874, 79868, 8239, 836, 84749, 84938, 85015, 90268, 9097, 9099, 9100, 92291, 9700, 9736, 9960	0.630459	FAM76A, ZRANB1, USP2, USP36, OTUD5, USP33, USP14, ALG13, USP10, GCA, USP34, USP35, UCHL3, SENP5, USP45, USP9X, ATG4C, USP30, ESPL1, USP37, USP20, CTSV, COPS4, USP3, CAPN5, OTULIN, UCHL1, USP16, CAPN13, CASP3, SENP8, USP50, USP7
1199	GO:0001067	regulatory region nucleic acid binding	GOMF	541	-0.0162362	0.904022	0.0730997	0.244884	down	10153, 10172, 1025, 10514, 1054, 10620, 10771, 10793, 11179, 138151, 1407, 148523, 1499, 152518, 1869, 2004, 2066, 2100, 2120, 2146, 219736, 22926, 23028, 23064, 23528, 23613, 2475, 2551, 2553, 25942, 2625, 2649, 27164, 29117, 29128, 2959, 3087, 3183, 3192, 3204, 3298, 3394, 343472, 3659, 3664, 3670, 3720, 406, 4084, 4087, 4221, 430, 4335, 4488, 4520, 4605, 4762, 4772, 4773, 4775, 4802, 4824, 486…	0.22392	KDM1A, GCFC2, ZNF195, JARID2, TFAP2B, CRY1, ZNF200, BRCA1, ZMYND11, ISL1, RNF10, HSF2, MXD1, NFYC, MNT, NFATC3, TP63, ZNF532, RARB, SMARCA2, TCF7, GRHL2, ZNF586, RRN3, TFAP2C, KDM2B, TBX5, HNRNPC, IKZF5, ZMYND8, MYBL2, NFATC2, SALL4, E2F1, GABPB1, EZH2, SETX, GATA3, MLX, ELK3, TBP, STAT1, KDM3A, CEBPZ, RBBP5, IRF6, ATF6, MSX2, SOHLH2, NR2C1, MTERF2, HOXA7, SNAI1, IRF1, TTF1, MED1, NR1D1, NFATC1, …
1194	GO:0000975	regulatory region DNA binding	GOMF	540	-0.0163657	0.903295	0.0711843	0.241251	down	10153, 10172, 1025, 10514, 1054, 10620, 10771, 10793, 11179, 138151, 1407, 148523, 1499, 152518, 1869, 2004, 2066, 2100, 2120, 2146, 219736, 22926, 23028, 23064, 23528, 23613, 2475, 2551, 2553, 25942, 2625, 2649, 27164, 29117, 29128, 2959, 3087, 3183, 3192, 3204, 3298, 3394, 343472, 3659, 3664, 3670, 3720, 406, 4084, 4087, 4221, 430, 4335, 4488, 4520, 4605, 4762, 4772, 4773, 4775, 4802, 4824, 486…	0.219313	KDM1A, GCFC2, ZNF195, JARID2, TFAP2B, CRY1, ZNF200, BRCA1, ZMYND11, ISL1, RNF10, HSF2, MXD1, NFYC, MNT, NFATC3, TP63, ZNF532, RARB, SMARCA2, TCF7, GRHL2, ZNF586, RRN3, TFAP2C, KDM2B, TBX5, HNRNPC, IKZF5, ZMYND8, MYBL2, NFATC2, SALL4, E2F1, GABPB1, EZH2, SETX, GATA3, MLX, ELK3, TBP, STAT1, KDM3A, CEBPZ, RBBP5, IRF6, ATF6, MSX2, SOHLH2, NR2C1, MTERF2, HOXA7, SNAI1, IRF1, TTF1, MED1, NR1D1, NFATC1, …
1182	GO:0022892	substrate-specific transporter activity	GOMF	564	-0.0164235	0.90297	0.0646004	0.23028	down	10052, 1015, 10227, 10237, 10257, 10396, 10526, 10560, 10717, 10955, 11001, 11136, 11141, 11260, 1136, 1138, 1139, 114134, 116369, 1183, 119559, 121260, 121601, 123606, 136306, 1434, 146167, 148808, 1497, 153129, 161, 163, 164, 1739, 201780, 2030, 206358, 2185, 222962, 22796, 22821, 23039, 23120, 23214, 23428, 23534, 23630, 23633, 23657, 245973, 2567, 2568, 25800, 25932, 26133, 26286, 27032, 2742…	0.209242	NIPAL3, SLC25A5, ABCB4, AP2B1, CACNA2D2, ATP2C1, SLC7A9, KPNA6, ATP6V0A1, SLC4A7, CTNS, ATP6V1H, ATP2C2, TNPO3, IPO5, VPS35, CLCN4, DLG1, CDH17, CHRNA3, KCNN2, PSEN1, TNPO1, MCOLN1, SLC7A8, GABRP, ITPR3, TRPC4AP, PRELID3B, SLCO4A1, GLRA2, ATP11C, SLC35A2, KPNA3, OCA2, NCALD, SLC17A7, SLC1A5, KCNT1, MFSD10, TRPV4, SLCO1B3, SLC26A8, SLC22A2, SLC29A1, TSNAX, IPO13, SLC19A2, ABCD3, ATP10B, PTK2B, SLC…
1560	GO:0008173	RNA methyltransferase activity	GOMF	44	-0.0168649	0.900496	0.587383	0.823849	down	113802, 154743, 221078, 27292, 51531, 54482, 54931, 55006, 57570, 64216, 96764	0.8153	DIMT1, TRMT13, TRMT5, TRMO, TGS1, HENMT1, TFB2M, BMT2, TRMT61B, TRMT10C, NSUN6
1614	GO:0008378	galactosyltransferase activity	GOMF	21	-0.0169175	0.900202	0.706625	0.910459	down	10678, 148789, 53947, 79369, 8706, 9334	0.89249	A4GALT, B4GALT5, B3GALNT2, B3GALNT1, B3GNT2, B3GNT4
1585	GO:0032451	demethylase activity	GOMF	30	-0.0169478	0.900033	0.652358	0.879573	down	221656, 23028, 23133, 54890, 55693, 55818, 84678	0.864943	KDM1A, KDM2B, ALKBH5, KDM3A, KDM1B, PHF8, KDM4D
1178	GO:0004871	signal transducer activity	GOMF	513	-0.0173561	0.897752	0.0625053	0.227791	down	10154, 1027, 10314, 10342, 10424, 10783, 11057, 1136, 1138, 1139, 1232, 1240, 1407, 1436, 1438, 1499, 1630, 1796, 1894, 1944, 2046, 2066, 2100, 2185, 219865, 2209, 22801, 22821, 23043, 23236, 2567, 2568, 25780, 26230, 2649, 26512, 26648, 2674, 2675, 27020, 27032, 27347, 2742, 2767, 2773, 2861, 2890, 2895, 2898, 2900, 2904, 2915, 2925, 29883, 3274, 3383, 342372, 3597, 3676, 3710, 3728, 375, 3756, …	0.209242	ADIPOR2, CRY1, ATP2C1, GAB2, RTN4R, GNAI3, MAPK6, EPHA8, MAP2K7, RARB, CHRNA3, NLK, GNA11, ICAM1, MCOLN1, GABRP, ITPR3, MAPK1, PPM1A, GLRA2, NDFIP2, STK24, INTS6, ZP2, MAPK8, TRPV4, CDKN1B, GOLT1B, NR2E1, HRH2, ECT2, TFG, ITGA4, DOK1, LANCL1, STAT1, ELOVL4, NEK6, NR2C1, PTK2B, GRPR, NR1D1, TRAF3, IL13RA1, PTPRE, SORT1, CD36, ACVR1B, PLXNC1, TLR4, GABBR2, PDCL, NEK1, ITGA11, LEF1, ESR2, ABHD2, NTR…
1597	GO:0032452	histone demethylase activity	GOMF	23	-0.0174924	0.896992	0.684265	0.904944	down	221656, 23028, 23133, 55693, 55818, 84678	0.886995	KDM1A, KDM2B, KDM3A, KDM1B, PHF8, KDM4D
1609	GO:0005246	calcium channel regulator activity	GOMF	20	-0.0176509	0.896109	0.702063	0.908786	down	27075, 55013, 55799, 5592, 9369	0.888835	MCUB, NRXN3, TSPAN13, CACNA2D3, PRKG1
1576	GO:0045182	translation regulator activity	GOMF	32	-0.0178704	0.894887	0.624579	0.854017	down	10605, 10643, 10658, 1618, 22849, 23034, 340719, 400961, 51247, 55095, 64506	0.840761	SAMD4A, DAZL, CPEB3, PAIP2, PAIP2B, IGF2BP3, CELF1, PAIP1, SAMD4B, NANOS1, CPEB1
1333	GO:0031267	small GTPase binding	GOMF	215	-0.018014	0.894089	0.205034	0.453261	down	10059, 10526, 10640, 10762, 11113, 11260, 120379, 128344, 1434, 1613, 164, 1730, 1894, 201294, 23002, 23032, 23039, 23163, 23191, 23214, 23216, 23500, 25780, 25782, 25924, 26056, 2665, 26985, 27342, 29091, 3842, 3843, 3993, 4688, 4905, 4943, 4952, 54843, 55357, 55633, 55763, 5583, 55920, 57510, 57522, 57553, 5879, 60412, 64786, 64901, 6792, 7074, 79778, 81624, 83874, 84079, 84440, 8826, 8936, 897…	0.421943	CDKL5, PRKCH, GDI2, IPO5, TBC1D22B, TBC1D1, GOLGA5, TBC1D25, EXOC5, LLGL2, NSF, USP33, TNPO1, DNM1L, EXOC1, UNC13D, NUP50, TBC1D2, TBC1D10A, HPS4, DAAM1, ANKRD27, WASF1, ECT2, NCF2, IPO13, RAB3GAP2, TBC1D15, OCRL, CIT, CSE1L, XPO5, GGA3, DOCK4, XPO7, RAB11FIP4, TBC1D5, EXOC4, IPO8, RAB11FIP5, RAC1, SYTL2, DIAPH3, IQGAP1, DAAM2, DIAPH2, PIH1D2, RABGAP1L, RASGRP3, RABGEF1, TIAM1, SYTL3, MICALL2, AP…
1439	GO:0001076	transcription factor activity, RNA polymerase II transcription factor binding	GOMF	107	-0.0181125	0.893542	0.366402	0.638272	down	10891, 11060, 116931, 138151, 23082, 23613, 25942, 3091, 3670, 4605, 473, 4848, 51586, 51741, 5308, 5469, 57496, 57591, 5932, 6595, 7021, 7088, 83881, 84864, 9355, 9412, 9477, 9575, 9988	0.609964	TFAP2B, ISL1, SMARCA2, MED15, HIF1A, ZMYND8, MYBL2, RBBP8, LHX2, PPARGC1A, CNOT2, MED20, MED1, CLOCK, DMTF1, RERE, MED12L, NACC2, PPRC1, MED21, PITX2, SIN3A, RIOX2, MIXL1, WWOX, MRTFB, MRTFA, TLE1, WWP2
1557	GO:0022843	voltage-gated cation channel activity	GOMF	39	-0.0181603	0.893277	0.58341	0.821961	down	11141, 23630, 3756, 3763, 3790, 51305, 57582, 775, 9254	0.814024	CACNA2D2, KCNT1, KCNH1, CACNA1C, KCNJ6, IL1RAPL1, KCNK9, KCNS3, KCNE5
1341	GO:0017016	Ras GTPase binding	GOMF	203	-0.0182113	0.892993	0.213107	0.461731	down	10059, 10526, 10640, 10762, 11113, 11260, 120379, 128344, 1434, 1613, 164, 1730, 1894, 201294, 23002, 23032, 23039, 23191, 23214, 23216, 23500, 25780, 25782, 25924, 26056, 26985, 27342, 29091, 3842, 3843, 3993, 4688, 4905, 4943, 4952, 54843, 55357, 55633, 55763, 5583, 55920, 57510, 57522, 57553, 5879, 60412, 64786, 64901, 6792, 7074, 79778, 81624, 83874, 84079, 84440, 8826, 8936, 89781, 94120, 96…	0.428626	CDKL5, PRKCH, IPO5, TBC1D22B, TBC1D1, GOLGA5, TBC1D25, EXOC5, LLGL2, NSF, USP33, TNPO1, DNM1L, EXOC1, UNC13D, NUP50, TBC1D2, TBC1D10A, HPS4, DAAM1, ANKRD27, WASF1, ECT2, NCF2, IPO13, RAB3GAP2, TBC1D15, OCRL, CIT, CSE1L, XPO5, DOCK4, XPO7, RAB11FIP4, TBC1D5, EXOC4, IPO8, RAB11FIP5, RAC1, SYTL2, DIAPH3, IQGAP1, DAAM2, DIAPH2, PIH1D2, RABGAP1L, RASGRP3, RABGEF1, TIAM1, SYTL3, MICALL2, AP1G1, DAPK3, …
1540	GO:0016279	protein-lysine N-methyltransferase activity	GOMF	47	-0.018215	0.892973	0.54615	0.788883	down	10919, 11091, 2146, 4221, 54093, 5929, 64754, 7468, 79723, 79813, 83852, 84193	0.780423	EZH2, NSD2, RBBP5, MEN1, SETDB2, SUV39H2, EHMT1, SETD3, SMYD3, SETD4, WDR5, EHMT2
1399	GO:0008022	protein C-terminus binding	GOMF	135	-0.0183167	0.892409	0.305781	0.578989	down	10055, 1022, 10458, 10612, 10935, 10963, 10971, 11190, 1499, 1613, 1739, 2071, 23426, 3397, 3839, 4436, 4688, 4691, 4747, 481, 4863, 51534, 51588, 5193, 54715, 54899, 5501, 5515, 5604, 5888, 6311, 6477, 6721, 675, 7153, 7155, 7529, 7874, 8089, 8161, 8554, 9223, 9525, 991	0.552478	VTA1, PIAS1, RAD51, DLG1, TOP2B, RBFOX1, MSH2, KPNA3, PIAS4, PEX12, TRIM3, PPP2CA, NCL, NCF2, CDC20, VPS4B, COIL, ID1, CEP250, YEATS4, TOP2A, CDK7, YWHAQ, BRCA2, SAE1, ATP1B1, NPAT, MAGI1, GRIP1, ERCC3, PRDX3, YWHAB, DAPK3, CTNNB1, PXK, STIP1, MAP2K1, BAIAP2, PPP1CC, USP7, SIAH1, SREBF2, ATXN2, NEFL
1477	GO:0047485	protein N-terminus binding	GOMF	80	-0.0183452	0.892251	0.428583	0.693858	down	10640, 10971, 11130, 142, 1457, 2071, 23256, 23613, 2571, 2745, 329, 3397, 382, 4221, 4863, 51164, 5501, 5604, 60412, 6118, 7189, 79718, 801, 805, 8202	0.663963	EXOC5, SCFD1, ZMYND8, CSNK2A1, BIRC2, RPA2, ZWINT, NCOA3, ID1, GAD1, EXOC4, DCTN4, MEN1, YWHAQ, PARP1, CALM2, NPAT, ERCC3, ARF6, MAP2K1, GLRX, TRAF6, TBL1XR1, PPP1CC, CALM1
1414	GO:0001227	transcriptional repressor activity, RNA polymerase II transcription regulatory region sequence-specific binding	GOMF	114	-0.0186641	0.890484	0.337532	0.611506	down	128553, 138151, 140883, 152518, 2120, 23528, 2625, 3087, 3720, 4084, 430, 4335, 4488, 4773, 4775, 54816, 571, 6304, 6497, 6615, 6721, 6926, 6932, 6936, 6945, 7022, 7101, 7181, 7764, 84108, 9572	0.577671	GCFC2, JARID2, MXD1, MNT, NFATC3, TCF7, TFAP2C, NFATC2, GATA3, MLX, NR2E1, MSX2, NR2C1, SNAI1, NR1D1, TBX3, ZNF280D, ETV6, NACC2, HHEX, BACH1, PCGF6, SKI, ZNF281, NFXL1, ZNF217, TSHZ2, SATB1, ASCL2, SREBF2, ZNF280B, AC090517.4
1595	GO:0000993	RNA polymerase II core binding	GOMF	20	-0.0187617	0.889944	0.685129	0.904944	down	51322, 64754, 79577	0.886995	WAC, CDC73, SMYD3
1555	GO:0016706	oxidoreductase activity, acting on paired donors, with incorporation or reduction of molecular oxygen, 2-oxoglutarate as one donor, and incorporation of one atom each of oxygen into both donors	GOMF	36	-0.0191201	0.887964	0.57992	0.819984	down	200424, 23133, 5033, 54790, 54890, 55239, 84678, 84864	0.813414	OGFOD1, KDM2B, ALKBH5, P4HA1, TET2, RIOX2, PHF8, TET3
1526	GO:0043022	ribosome binding	GOMF	47	-0.0192219	0.887403	0.525228	0.780541	down	219402, 22849, 2475, 253260, 54915, 64506, 708, 7917, 79631, 83939, 90459	0.760724	ERI1, CPEB3, C1QBP, MTIF3, EFL1, EIF2A, YTHDF1, RICTOR, MTOR, BAG6, CPEB1
1561	GO:0016860	intramolecular oxidoreductase activity	GOMF	33	-0.0193195	0.886864	0.59245	0.829621	down	10007, 10728, 132789, 1638, 22934, 3422, 56605, 81542, 84650, 9601	0.820197	IDI1, DCT, ERO1B, PTGES3, GNPDA1, EBPL, TMX1, RPIA, PDIA4, GNPDA2
1280	GO:0046982	protein heterodimerization activity	GOMF	251	-0.0193988	0.886428	0.142394	0.363711	down	10017, 10051, 10054, 10055, 10300, 10363, 10388, 1054, 1058, 10592, 111, 11104, 121551, 2034, 221154, 22926, 2551, 2553, 2571, 25782, 25793, 25801, 27131, 2730, 2958, 3014, 3074, 3091, 374986, 3756, 3985, 4087, 4281, 4747, 4802, 5049, 51094, 51305, 51616, 5295, 5316, 54107, 5422, 55787, 5596, 5597, 57451, 580, 58533, 638, 64241, 654, 664, 6643, 665, 6665, 6875, 6880, 6945, 7021, 7153, 7155, 7163,…	0.332878	ADIPOR2, TFAP2B, GCLM, CUL3, HEXB, NFYC, MAPK6, SMC1A, TPD52, TOP2B, TXLNG, SNX5, FBXO7, BIK, HIF1A, POLA1, MID1, HOMER2, GABPB1, BNIP3L, SMC3, MLX, TIMELESS, SMC4, FXR1, CENPA, GCA, EPAS1, ATF6, RAB3GAP2, UBA2, YWHAH, GAD1, SOX15, SNX6, TOP2A, SMC2, BCL2L10, BARD1, SYT16, GTF2A2, HMG20A, KATNB1, TAF4B, MAPK4, SAE1, KCNH1, ABCG8, PIK3R1, TENM2, POLE3, BTBD11, QTRT2, BMP6, CEBPG, GABPA, ADIPOR1, P…
1105	GO:0043565	sequence-specific DNA binding	GOMF	643	-0.0197258	0.884628	0.0192387	0.100945	down	10009, 10111, 10153, 10172, 1025, 10481, 10514, 1054, 1058, 10620, 10771, 10793, 10891, 11004, 11063, 11179, 124535, 138151, 1389, 1407, 148523, 152518, 1750, 1786, 1788, 1789, 1869, 2004, 2034, 2100, 2120, 2146, 219736, 222229, 22926, 23028, 2305, 23064, 23125, 23314, 23528, 23594, 23613, 2475, 2551, 25913, 25942, 26097, 2625, 26277, 2649, 27164, 29128, 2960, 3087, 3091, 3183, 3204, 3298, 343472…	0.09322	KDM1A, DHX33, GCFC2, ZNF195, DLX6, JARID2, TFAP2B, CRY1, ZNF200, ZMYND11, ISL1, SNAPC1, HSF2, SOX30, MXD1, NFYC, MNT, NFATC3, MCM2, TP63, ZNF532, RARB, TCF7, GRHL2, ZNF586, RRN3, TFAP2C, DNMT3B, KDM2B, TBX5, ORC6, HNRNPC, TINF2, CDC45, MSH2, IKZF5, HIF1A, ZMYND8, MYBL2, NFATC2, SALL4, E2F1, EZH2, LHX2, SETX, GATA3, CAMTA2, MLX, NSD2, PPARGC1A, CSRNP2, ELK3, FOXM1, CREBL2, NR2E1, TBP, RAD50, NCL, …
1517	GO:0000049	tRNA binding	GOMF	44	-0.0202867	0.88155	0.51752	0.775226	down	10667, 11260, 221078, 26024, 348180, 4141, 51095, 57510, 5917, 79693, 81627, 83939	0.754275	TRNT1, PTCD1, RARS, TRMT1L, XPO5, EIF2A, FARS2, MARS, CTU2, XPOT, YRDC, NSUN6
1359	GO:0043168	anion binding	GOMF	142	-0.0206275	0.879685	0.239685	0.497062	down	11252, 1183, 123169, 159, 1636, 211, 2571, 27244, 2742, 2904, 4942, 5033, 5095, 55034, 55239, 56270, 57231, 5917, 59338, 6472, 6809, 7529, 79896, 83667, 84706, 8724, 8729, 8879, 8942, 9054, 91404, 9227, 9731, 9846	0.469678	ALAS1, GAB2, ADSS, OAT, CLCN4, MOCOS, SESN1, OGFOD1, PACSIN2, GLRA2, PLEKHA1, GBF1, SNX3, RARS, KYNU, CEP104, LRAT, P4HA1, GAD1, SESN2, SNX14, WDR45B, ACE, GPT2, SGPL1, LEO1, STX3, YWHAB, PCCA, SHMT2, THNSL1, SESTD1, NFS1, GRIN2B
1270	GO:0051020	GTPase binding	GOMF	233	-0.0207686	0.878913	0.131182	0.345196	down	10059, 10526, 10640, 10762, 11113, 11260, 120379, 128344, 1434, 1613, 164, 1730, 1894, 201294, 2058, 23002, 23032, 23039, 23163, 23191, 23214, 23216, 23500, 25780, 25782, 25924, 26056, 2665, 26985, 27342, 29091, 3842, 3843, 3993, 4688, 4905, 4943, 4952, 54708, 54843, 55357, 55633, 55763, 5583, 55920, 57510, 57522, 57553, 5879, 60412, 6455, 64786, 64901, 664, 6792, 7074, 79778, 81624, 83874, 84079…	0.313543	CDKL5, PRKCH, GDI2, IPO5, TBC1D22B, TBC1D1, GOLGA5, TBC1D25, EXOC5, LLGL2, NSF, USP33, TNPO1, DNM1L, EXOC1, UNC13D, NUP50, TBC1D2, TBC1D10A, HPS4, DAAM1, ANKRD27, RAB3D, WASF1, ECT2, NCF2, IPO13, RAB3GAP2, TBC1D15, OCRL, CIT, CSE1L, XPO5, GGA3, DOCK4, XPO7, RAB11FIP4, TBC1D5, EXOC4, IPO8, RAB11FIP5, RAC1, EPRS, SYTL2, DIAPH3, IQGAP1, SH3GL1, DAAM2, DIAPH2, PIH1D2, RABGAP1L, RASGRP3, RABGEF1, TIAM…
1541	GO:0018024	histone-lysine N-methyltransferase activity	GOMF	37	-0.0207694	0.878909	0.543783	0.788883	down	10919, 11091, 2146, 4221, 5929, 64754, 7468, 79723, 79813, 83852, 84193	0.77913	EZH2, NSD2, RBBP5, MEN1, SETDB2, SUV39H2, EHMT1, SETD3, SMYD3, WDR5, EHMT2
1250	GO:0005525	GTP binding	GOMF	253	-0.0208545	0.878445	0.114668	0.320011	down	10059, 10767, 116987, 121268, 159, 205, 2071, 22800, 22931, 22974, 23176, 23560, 26052, 26164, 26354, 2643, 27289, 2767, 2773, 28512, 2935, 29889, 3326, 347688, 375, 377, 382, 400, 4976, 51184, 51552, 55207, 55288, 55647, 55720, 55733, 57403, 58477, 5862, 5869, 5870, 5873, 5874, 5878, 5879, 5880, 5898, 5899, 5901, 5908, 6016, 64225, 64901, 6729, 7277, 79631, 79705, 79785, 84340, 84790, 85004, 858…	0.291182	RALA, ADSS, RAB27B, HHAT, GNAI3, RAB27A, CDC42, DNM1L, GNA11, TPX2, HSP90AB1, RAB18, GTPBP1, RAB36, SRP54, MTG2, GSPT1, RAB11A, RAB2A, RAB3D, GTPBP10, GTPBP4, RAB5C, EFTUD2, GPN3, RERGL, RAB5B, HBS1L, MFN2, RAB14, ATL2, ARL1, SEPTIN7, RAB22A, RHOT1, RAP1B, TUBA4A, RAC2, GCH1, RAN, RRAS2, ARL8B, ARF3, RERG, GNL2, RAC1, RAB20, EFL1, RIT1, ARF1, RALB, SRPRB, LRRK1, GNA14, AGAP1, AK4, ERCC3, GNL3, GF…
1267	GO:0003713	transcription coactivator activity	GOMF	234	-0.0211497	0.876834	0.123808	0.328771	down	1022, 10600, 10891, 11036, 11319, 116931, 117143, 135112, 1488, 1499, 1655, 170261, 2100, 22926, 22938, 23028, 23054, 23082, 23426, 24148, 2551, 2625, 26292, 27097, 29117, 2958, 329, 3298, 3670, 3728, 4335, 4520, 473, 4802, 4863, 51741, 5308, 5469, 55827, 56254, 57496, 57591, 5901, 6047, 6595, 6602, 672, 676, 6880, 7021, 7027, 79595, 8031, 81550, 8202, 84193, 8464, 8554, 86, 8609, 87, 9063, 9321,…	0.299954	KDM1A, TFAP2B, BRCA1, RNF14, ISL1, HSF2, TBPL1, PIAS1, RNF4, SMARCD1, NFYC, MNT, ACTN1, PIAS2, SMARCA2, TDRD3, SNW1, TRIP11, PRPF6, GATA3, DDX5, PPARGC1A, BIRC2, NCOA7, ATF6, KLF7, ECD, NCOA3, MED20, MED1, RAN, CDK7, TAF5L, ACTL6A, SAP130, BRDT, ESR2, GTF2A2, RERE, DCAF6, MED12L, PPRC1, NPAT, TADA1, MED21, GABPA, RNF20, GRIP1, USP16, PITX2, BRD7, CTNNB1, JUP, ZCCHC12, CTBP2, SETD3, WWOX, MRTFB, M…
1478	GO:0004197	cysteine-type endopeptidase activity	GOMF	60	-0.0212598	0.876235	0.42977	0.694488	down	10600, 10868, 1515, 205564, 23032, 25801, 57695, 726, 7345, 7874, 8239, 836, 84749, 84938, 9097, 9099, 9100, 92291, 9700, 9736	0.663963	USP2, USP33, USP14, USP10, GCA, USP34, SENP5, USP9X, ATG4C, USP30, ESPL1, USP37, USP20, CTSV, CAPN5, UCHL1, USP16, CAPN13, CASP3, USP7
1572	GO:0015459	potassium channel regulator activity	GOMF	23	-0.0215361	0.874731	0.620062	0.852114	down	1739, 1804, 23327, 23630, 3790, 57463, 57628, 80333	0.839073	NEDD4L, DLG1, DPP6, KCNS3, DPP10, KCNE5, AMIGO1, KCNIP4
1469	GO:0001191	transcriptional repressor activity, RNA polymerase II transcription factor binding	GOMF	61	-0.0215423	0.874698	0.420154	0.686594	down	11060, 116931, 23613, 25942, 3670, 473, 51741, 5308, 57496, 57591, 5932, 6595, 7021, 7088, 83881, 84864, 9575	0.658654	TFAP2B, ISL1, SMARCA2, ZMYND8, RBBP8, CLOCK, RERE, MED12L, PITX2, SIN3A, RIOX2, MIXL1, WWOX, MRTFB, MRTFA, TLE1, WWP2
1580	GO:0016411	acylglycerol O-acyltransferase activity	GOMF	21	-0.0218946	0.872785	0.630336	0.856395	down	129642, 51099, 54675, 57104, 79888	0.841121	ABHD5, CRLS1, MBOAT2, LPCAT1, PNPLA2
1577	GO:0016790	thiolester hydrolase activity	GOMF	21	-0.0220648	0.871862	0.627811	0.854411	down	10434, 11332, 127018, 26275, 3029, 9374	0.840761	HAGH, ACOT7, LYPLA1, LYPLAL1, HIBCH, PPT2
1142	GO:0004872	receptor activity	GOMF	393	-0.0220905	0.871723	0.039141	0.165494	down	10154, 10314, 10424, 11057, 1136, 1138, 1139, 114908, 1232, 1240, 1407, 1436, 1438, 154796, 1630, 1739, 1944, 2046, 2066, 2100, 2185, 219865, 22801, 22821, 23471, 23534, 23705, 2567, 2568, 2649, 26512, 26648, 267, 2674, 2675, 27020, 2742, 2861, 286133, 2890, 2895, 2898, 2900, 2904, 2915, 2925, 3274, 3383, 3416, 342372, 3597, 3676, 3710, 3756, 3763, 3815, 390059, 4306, 433, 4481, 4824, 4864, 4916,…	0.147958	ADIPOR2, CRY1, NRXN3, MSR1, RTN4R, TNPO3, TRAM1, EPHA8, DLG1, RARB, CHRNA3, ICAM1, MCOLN1, GABRP, ITPR3, GLRA2, INTS6, ZP2, NCALD, SLC17A7, SLC1A5, TRPV4, NR2E1, HRH2, ITGA4, LANCL1, ELOVL4, IDE, NR2C1, PTK2B, MED1, GRPR, AMOT, NR1D1, IL13RA1, SELENOS, PTPRE, SORT1, CD36, ACVR1B, PLXNC1, TLR4, GABBR2, DERL1, ITGA11, LEF1, ESR2, ABHD2, NTRK3, NPC1, KCNH1, EFNA3, CALM2, PTH2R, PTPRG, VLDLR, NR6A1, …
1145	GO:0060089	molecular transducer activity	GOMF	393	-0.0220905	0.871723	0.039141	0.165494	down	10154, 10314, 10424, 11057, 1136, 1138, 1139, 114908, 1232, 1240, 1407, 1436, 1438, 154796, 1630, 1739, 1944, 2046, 2066, 2100, 2185, 219865, 22801, 22821, 23471, 23534, 23705, 2567, 2568, 2649, 26512, 26648, 267, 2674, 2675, 27020, 2742, 2861, 286133, 2890, 2895, 2898, 2900, 2904, 2915, 2925, 3274, 3383, 3416, 342372, 3597, 3676, 3710, 3756, 3763, 3815, 390059, 4306, 433, 4481, 4824, 4864, 4916,…	0.147958	ADIPOR2, CRY1, NRXN3, MSR1, RTN4R, TNPO3, TRAM1, EPHA8, DLG1, RARB, CHRNA3, ICAM1, MCOLN1, GABRP, ITPR3, GLRA2, INTS6, ZP2, NCALD, SLC17A7, SLC1A5, TRPV4, NR2E1, HRH2, ITGA4, LANCL1, ELOVL4, IDE, NR2C1, PTK2B, MED1, GRPR, AMOT, NR1D1, IL13RA1, SELENOS, PTPRE, SORT1, CD36, ACVR1B, PLXNC1, TLR4, GABBR2, DERL1, ITGA11, LEF1, ESR2, ABHD2, NTRK3, NPC1, KCNH1, EFNA3, CALM2, PTH2R, PTPRG, VLDLR, NR6A1, …
1305	GO:0004518	nuclease activity	GOMF	160	-0.0225533	0.869219	0.174664	0.41502	down	10111, 10146, 146956, 1653, 167227, 1763, 201164, 23019, 23144, 246175, 246243, 28987, 29883, 4848, 5073, 51567, 51692, 5393, 5422, 5423, 54464, 55247, 55775, 56164, 5810, 5888, 5889, 5890, 5932, 60528, 64782, 65080, 7247, 7516, 79650, 80153, 8930, 90459, 92667, 9337	0.384609	ELAC2, ZC3H3, TDP1, RAD51, POLB, DDX1, RBBP8, POLA1, USB1, ERI1, RAD51C, NEIL3, CNOT2, TDP2, RAD1, RAD50, XRN1, CPSF3, EXOSC9, CNOT1, MGME1, MBD4, MRPL44, DNA2, CNOT6L, PARN, NOB1, G3BP1, EME1, CNOT8, RNASEH1, DCP2, EDC3, PLD6, AEN, RAD51B, STK31, XRCC2, CNOT7, TSN
1216	GO:0032561	guanyl ribonucleotide binding	GOMF	258	-0.0226634	0.868625	0.0847862	0.266602	down	10059, 10767, 116987, 121268, 159, 205, 2071, 22800, 22931, 22974, 23176, 23560, 26052, 26164, 26354, 2643, 27289, 2767, 2773, 28512, 2935, 29889, 3326, 347688, 375, 377, 382, 400, 4976, 51143, 51184, 5136, 51552, 55207, 55288, 55647, 55720, 55733, 5592, 5631, 57403, 58477, 5862, 5869, 5870, 5873, 5874, 5878, 5879, 5880, 5898, 5899, 5901, 5908, 6016, 64225, 64901, 6729, 7277, 79631, 79705, 79785,…	0.241663	RALA, ADSS, RAB27B, HHAT, GNAI3, RAB27A, CDC42, DNM1L, GNA11, TPX2, HSP90AB1, RAB18, GTPBP1, RAB36, SRP54, MTG2, GSPT1, RAB11A, RAB2A, RAB3D, GTPBP10, GTPBP4, RAB5C, EFTUD2, GPN3, RERGL, RAB5B, HBS1L, PDE1A, MFN2, RAB14, ATL2, ARL1, SEPTIN7, RAB22A, RHOT1, RAP1B, TUBA4A, RAC2, GCH1, RAN, RRAS2, ARL8B, ARF3, RERG, GNL2, RAC1, RAB20, EFL1, RIT1, ARF1, RALB, DYNC1LI1, SRPRB, PRPS1, LRRK1, GNA14, AGA…
1396	GO:0017137	Rab GTPase binding	GOMF	91	-0.0227827	0.867981	0.299744	0.572466	down	10059, 128344, 164, 201294, 23216, 25782, 25924, 26056, 26985, 27342, 3993, 4905, 4943, 54843, 55357, 55633, 57553, 5879, 64786, 79778, 83874, 84079, 84440, 89781, 94120, 9779, 9910, 9950	0.548267	TBC1D22B, TBC1D1, GOLGA5, TBC1D25, LLGL2, NSF, DNM1L, UNC13D, TBC1D2, TBC1D10A, HPS4, ANKRD27, RAB3GAP2, TBC1D15, RAB11FIP4, TBC1D5, RAB11FIP5, RAC1, SYTL2, RABGAP1L, RABGEF1, SYTL3, MICALL2, AP1G1, MYRIP, PIFO, AP3M1, MICAL3
1571	GO:0051019	mitogen-activated protein kinase binding	GOMF	20	-0.0235212	0.864006	0.615129	0.847749	down	1636, 4772, 5598, 8493, 8826	0.836387	NFATC1, IQGAP1, ACE, MAPK7, PPM1D
1369	GO:0043130	ubiquitin binding	GOMF	98	-0.0237196	0.862942	0.263697	0.532901	down	10040, 10600, 1163, 1407, 23172, 23636, 25793, 29979, 329, 337867, 3416, 51720, 54469, 54764, 55968, 56852, 5887, 64771, 7013, 7153, 7319, 7334, 7345, 7347, 7917, 81930, 8315, 83932, 84142, 8480, 8878, 9184, 92181	0.505578	CRY1, SPRTN, ZRANB1, RAD18, UBE2A, ZFAND6, UIMC1, NSFL1C, BRAP, FBXO7, RAE1, BIRC2, UCHL3, RAD23B, IDE, KIF18A, TOP2A, UBAC2, UBQLN1, TOM1L1, TERF1, UCHL1, BUB3, USP16, SQSTM1, ABRAXAS1, ABRAXAS2, UBTD2, CKS1B, UBE2N, ILRUN, BAG6, NUP62
1486	GO:0015103	inorganic anion transmembrane transporter activity	GOMF	44	-0.0238846	0.862057	0.449772	0.716182	down	116369, 1183, 121601, 2567, 2568, 25932, 2742, 284129, 54020, 56172, 57030, 94015, 9497	0.686901	SLC4A7, CLCN4, GABRP, GLRA2, SLC17A7, SLC26A8, TTYH2, ANO4, ANKH, SLC37A1, CLIC4, SLC26A11, GABRG3
1188	GO:0019001	guanyl nucleotide binding	GOMF	259	-0.0241938	0.860402	0.066186	0.231332	down	10059, 10767, 116987, 121268, 159, 205, 2071, 22800, 22931, 22974, 23176, 23560, 25939, 26052, 26164, 26354, 2643, 27289, 2767, 2773, 28512, 2935, 29889, 3326, 347688, 375, 377, 382, 400, 4976, 51143, 51184, 5136, 51552, 55207, 55288, 55647, 55720, 55733, 5592, 5631, 57403, 58477, 5862, 5869, 5870, 5873, 5874, 5878, 5879, 5880, 5898, 5899, 5901, 5908, 6016, 64225, 64901, 6729, 7277, 79631, 79705,…	0.210266	RALA, ADSS, RAB27B, HHAT, GNAI3, RAB27A, CDC42, DNM1L, GNA11, TPX2, HSP90AB1, RAB18, GTPBP1, RAB36, SRP54, MTG2, SAMHD1, GSPT1, RAB11A, RAB2A, RAB3D, GTPBP10, GTPBP4, RAB5C, EFTUD2, GPN3, RERGL, RAB5B, HBS1L, PDE1A, MFN2, RAB14, ATL2, ARL1, SEPTIN7, RAB22A, RHOT1, RAP1B, TUBA4A, RAC2, GCH1, RAN, RRAS2, ARL8B, ARF3, RERG, GNL2, RAC1, RAB20, EFL1, RIT1, ARF1, RALB, DYNC1LI1, SRPRB, PRPS1, LRRK1, GN…
1068	GO:0016301	kinase activity	GOMF	565	-0.0244086	0.859255	0.00702556	0.0474361	down	100130827, 10111, 1017, 1020, 1022, 1024, 1025, 10420, 10783, 11064, 1111, 11113, 127933, 1436, 1438, 1453, 1456, 1457, 145957, 1607, 1613, 166614, 166929, 1739, 1740, 1944, 2046, 205, 2066, 2071, 2185, 221264, 22928, 23043, 23178, 2475, 2534, 2580, 26127, 26289, 26750, 27020, 27347, 282974, 283455, 29110, 2931, 2932, 2965, 29904, 29959, 3705, 375298, 3756, 3815, 3985, 4140, 415116, 4342, 4354, 4…	0.0440544	AGK, CDKL5, CDK11A, BAZ1B, FYN, PRKCH, VRK2, ALDH18A1, PRKCQ, PFKP, MAPK6, TESK2, CAMK2A, EPHA8, MARK3, DLG1, MAP2K7, PIK3C3, MOK, STK17B, GSK3B, NLK, AURKA, SRPK1, CDC7, MAPK1, ITPK1, VRK1, RPS6KA5, CSNK2A1, RIOK3, PGK1, CDK16, STK24, EEF2K, GSK3A, PRKAG2, PIP5K1B, MAPK8, MPP2, GTF2H1, PRKAB1, FGFR1OP2, TTK, RAD50, NRBP1, PASK, NEK2, TJP2, CNTRL, NEK6, MASTL, PTK2B, CIT, CDK2, RIOK1, MPP1, CDK8,…
1467	GO:0008081	phosphoric diester hydrolase activity	GOMF	49	-0.0246228	0.858112	0.411785	0.67929	down	201164, 23236, 2822, 5136, 5139, 5144, 51567, 5336, 55512, 55627, 55775, 8622	0.65128	TDP1, SMPD3, TDP2, GPLD1, PDE8B, PDE4D, PDE1A, SMPD4, PDE3A, PLD6, PLCB1, PLCG2, AC022414.1
1204	GO:0005543	phospholipid binding	GOMF	220	-0.0252882	0.854571	0.0768817	0.252694	down	10125, 11033, 114876, 114884, 115703, 116987, 127833, 129401, 153090, 23178, 23236, 23636, 246, 26119, 26750, 27131, 27236, 2733, 2886, 29091, 29127, 310, 3710, 4643, 4651, 51429, 51760, 5217, 54843, 54877, 54899, 55204, 55763, 55968, 56270, 57231, 5756, 57580, 57590, 58533, 64083, 64853, 65977, 6643, 80115, 80196, 81609, 81846, 8291, 8301, 8411, 8723, 8724, 8729, 8826, 889, 91404, 9372, 94120, 9…	0.232829	KRIT1, ARHGAP33, GAB2, SNAP91, PFN2, PICALM, WDFY1, NSFL1C, SNX5, EXOC1, ITPR3, EEA1, SYT17, ADAP1, GBF1, SNX3, GOLPH3, SNX4, PASK, PLEKHA3, GLE1, PREX1, BAIAP2L2, SNX6, SNX9, SBF2, SNX14, DYSF, RPS6KC1, DAB2IP, SYTL2, ANXA7, IQGAP1, OSBPL1A, WDR45B, ZCCHC2, GRB7, SNX27, GOLPH3L, SYT2, OSBPL10, MYO10, TWF1, ZFYVE9, MYO1E, LDLRAP1, AGAP1, RACGAP1, ALOX15, NUP35, ARFIP1, SYTL3, PXK, STXBP6, RNF34, …
1072	GO:0016788	hydrolase activity, acting on ester bonds	GOMF	500	-0.0254893	0.853503	0.00803759	0.0526371	down	10111, 10146, 10434, 10908, 11057, 11072, 11221, 11332, 127018, 130367, 140838, 146956, 1653, 167227, 1739, 1763, 1847, 1849, 201164, 2138, 221955, 22908, 23019, 23144, 23236, 246175, 246243, 248, 2588, 25930, 25939, 26275, 27124, 27143, 2799, 2822, 28987, 29883, 3029, 313, 3612, 3705, 3991, 4848, 493911, 4952, 5048, 5049, 5073, 51099, 5136, 5139, 5144, 51567, 51692, 5209, 5336, 5393, 5422, 5423,…	0.0492418	MTMR7, ELAC2, PAFAH1B1, ABHD5, ZC3H3, PNPLA6, TDP1, RAD51, HAGH, PTPN3, POLB, DLG1, PTPN23, SYNJ2, LIPE, DDX1, PPEF1, MTMR2, ACOT7, MTMR3, DDHD1, ITPK1, PPM1A, SAMHD1, RBBP8, POLA1, USB1, SMPD3, EYA1, ERI1, PALD1, RAD51C, NEIL3, PTPN5, PPM1H, CNOT2, TDP2, PTP4A1, GPLD1, FIG4, DUSP22, PDE8B, PDE4D, RAD1, RAD50, PPP2CA, XRN1, PPM1G, PDE1A, CPSF3, PPP6C, LYPLA1, OCRL, EXOSC9, CNOT1, MGME1, DLGAP5, M…
1516	GO:0015108	chloride transmembrane transporter activity	GOMF	29	-0.0257437	0.852155	0.509669	0.770271	down	116369, 1183, 121601, 2567, 2568, 25932, 2742, 284129, 57030, 94015	0.746301	CLCN4, GABRP, GLRA2, SLC17A7, SLC26A8, TTYH2, ANO4, CLIC4, SLC26A11, GABRG3
1033	GO:0016772	transferase activity, transferring phosphorus-containing groups	GOMF	694	-0.0259007	0.851324	0.00169396	0.0156962	down	100130827, 10111, 1017, 1020, 1022, 1024, 10243, 1025, 10420, 10514, 10621, 10622, 10728, 10783, 11044, 11064, 1111, 11113, 11128, 127933, 132001, 1436, 1438, 1453, 1456, 1457, 145957, 1607, 1613, 166614, 166929, 167153, 1736, 1739, 1740, 1944, 201164, 201973, 2046, 205, 2066, 2071, 2185, 221264, 22928, 23043, 23178, 2475, 2534, 2580, 26127, 26289, 26750, 27020, 27347, 282974, 283455, 29110, 2931…	0.0143315	AGK, CDKL5, CDK11A, BAZ1B, FYN, PRKCH, VRK2, ALDH18A1, PRKCQ, PFKP, MAPK6, POLB, TESK2, CAMK2A, EPHA8, TRNT1, MARK3, DLG1, MAP2K7, PIK3C3, MOK, STK17B, GSK3B, NLK, PGS1, AURKA, CRLS1, SRPK1, CDC7, POLRMT, MAPK1, ITPK1, VRK1, RPS6KA5, CSNK2A1, CDS2, USP14, RIOK3, POLA1, PGK1, CDK16, STK24, EEF2K, GSK3A, PRKAG2, PIP5K1B, MAPK8, MPP2, GTF2H1, PTGES3, PRKAB1, FGFR1OP2, TTK, TENT4A, POLR3G, RAD50, NRB…
1395	GO:0001078	transcriptional repressor activity, RNA polymerase II core promoter proximal region sequence-specific binding	GOMF	70	-0.026094	0.850302	0.300364	0.572466	down	128553, 138151, 152518, 23528, 2625, 3087, 4084, 430, 4773, 571, 6497, 6615, 6721, 6926, 6936, 7022, 7101, 7181, 7764, 9572	0.548267	GCFC2, MXD1, TFAP2C, NFATC2, GATA3, NR2E1, NR2C1, SNAI1, NR1D1, TBX3, NACC2, HHEX, BACH1, SKI, ZNF281, NFXL1, ZNF217, TSHZ2, ASCL2, SREBF2
1499	GO:0008374	O-acyltransferase activity	GOMF	33	-0.026271	0.849367	0.473479	0.736429	down	129642, 51099, 54675, 55733, 57104, 6646, 79888, 9227	0.708888	ABHD5, HHAT, SOAT1, CRLS1, LRAT, MBOAT2, LPCAT1, PNPLA2
1436	GO:0051117	ATPase binding	GOMF	54	-0.0263697	0.848846	0.357961	0.632333	down	11345, 258010, 26747, 481, 5144, 535, 55829, 55968, 5774, 5898, 5899, 6880, 7225, 7430, 7466, 79139, 84447, 9550	0.601871	RALA, ATP6V0A1, GABARAPL2, PTPN3, NUFIP1, NSFL1C, EZR, WFS1, PDE4D, SELENOS, ATP6V1G1, DERL1, TRPC6, ATP1B1, RALB, SYVN1, SVIP, TAF9
1470	GO:0003899	DNA-directed RNA polymerase activity	GOMF	41	-0.0265439	0.847927	0.419935	0.686594	down	10621, 10622, 11128, 201973, 5422, 5440, 5442, 5558, 81488, 9412, 9477	0.658654	POLRMT, POLA1, POLR3G, MED20, POLR3F, PRIM2, POLR2K, POLR3A, MED21, PRIMPOL, POLR2M
1056	GO:0016773	phosphotransferase activity, alcohol group as acceptor	GOMF	511	-0.0275379	0.842706	0.00396911	0.0290512	down	100130827, 1017, 1020, 1022, 1024, 1025, 10420, 10783, 11064, 1111, 11113, 127933, 1436, 1438, 1453, 1456, 1457, 145957, 1607, 1613, 166614, 1944, 2046, 2066, 2071, 2185, 23043, 23178, 2475, 2534, 2580, 26127, 26750, 27020, 27347, 282974, 283455, 29110, 2931, 2932, 2965, 29904, 29959, 3705, 3756, 3815, 3985, 4140, 415116, 4342, 4750, 4751, 4916, 494551, 5062, 5127, 51422, 5170, 51701, 51719, 5209…	0.026779	AGK, CDKL5, CDK11A, BAZ1B, FYN, PRKCH, VRK2, PRKCQ, PFKP, MAPK6, TESK2, CAMK2A, EPHA8, MARK3, MAP2K7, PIK3C3, MOK, STK17B, GSK3B, NLK, AURKA, SRPK1, CDC7, MAPK1, ITPK1, VRK1, RPS6KA5, CSNK2A1, RIOK3, CDK16, STK24, EEF2K, GSK3A, PRKAG2, PIP5K1B, MAPK8, GTF2H1, PRKAB1, FGFR1OP2, TTK, NRBP1, PASK, NEK2, CNTRL, NEK6, MASTL, PTK2B, CIT, CDK2, RIOK1, CDK8, CCNB1, CDK7, CCNH, RFK, ACVR1B, CAB39, DGKB, B…
1315	GO:0005057	receptor signaling protein activity	GOMF	101	-0.0278736	0.84095	0.186163	0.431975	down	1027, 1796, 2066, 2209, 23043, 26230, 27347, 375, 3815, 4087, 4342, 4750, 5062, 5082, 51701, 5594, 5596, 5597, 5598, 5599, 5604, 5609, 5871, 7074, 8428, 9046, 91	0.403352	MAPK6, MAP2K7, NLK, MAPK1, STK24, MAPK8, CDKN1B, DOK1, ACVR1B, PDCL, NEK1, MAPK4, ARF1, TIAM2, DOK2, FCGR1A, TNIK, TIAM1, KIT, MAPK7, MAP4K2, MAP2K1, MOS, SMAD2, ERBB4, PAK2, STK39
1233	GO:0016747	transferase activity, transferring acyl groups other than amino-acyl groups	GOMF	162	-0.0279099	0.84076	0.0946646	0.282065	down	11091, 11143, 117143, 117245, 129642, 157570, 204219, 211, 253782, 27097, 38, 5049, 51099, 51125, 51126, 51616, 54503, 54675, 54995, 55226, 55625, 55733, 57104, 60481, 64841, 6646, 675, 6785, 6877, 6880, 79071, 79595, 79829, 79888, 79993, 80218, 8202, 83401, 84243, 8464, 9227, 92292, 9329, 9425, 9575	0.256295	ABHD5, ELOVL5, ALAS1, HHAT, SOAT1, ACAT1, CRLS1, GNPNAT1, NAA40, ELOVL4, ELOVL3, LRAT, NAA50, NCOA3, GTF3C4, CLOCK, NAT10, TAF5L, KAT7, SAP130, BRCA2, MBOAT2, GOLGA7, TAF5, OXSM, TADA1, CDYL, LPCAT1, ZDHHC7, CERS3, ELOVL7, GLYATL1, PLAAT5, PAFAH1B2, ELOVL6, ESCO2, CERS6, NAA20, ZDHHC13, PNPLA2, TAF9B, SUPT3H, WDR5, ZDHHC18, TAF9
1538	GO:0008601	protein phosphatase type 2A regulator activity	GOMF	21	-0.0280871	0.839835	0.542139	0.78832	down	5520, 5521, 5525, 6418	0.778869	PPP2R5A, SET, PPP2R2B, PPP2R2A
1484	GO:0005070	SH3/SH2 adaptor activity	GOMF	32	-0.0287711	0.836272	0.441609	0.705765	down	10451, 10580, 1124, 1398, 2886, 6461, 8440	0.676373	NCK2, SORBS1, CHN2, SHB, VAV3, GRB7, CRK
1258	GO:0005088	Ras guanyl-nucleotide exchange factor activity	GOMF	133	-0.0287815	0.836218	0.118451	0.322357	down	100271715, 10125, 10160, 10451, 1102, 1438, 145957, 153020, 1793, 1794, 1894, 2066, 23268, 2534, 25780, 25782, 26084, 26230, 2674, 2675, 27342, 2904, 3815, 4747, 50650, 54869, 57580, 5924, 6453, 7074, 79958, 801, 805, 815, 818, 81846, 84904, 8567, 8874, 8997	0.29502	FYN, CAMK2A, ARHGEF7, DNMBP, MADD, RASGRF2, ECT2, ARHGEF26, RAB3GAP2, PREX1, EPS8L1, SBF2, VAV3, DOCK2, RCBTB2, ARHGEF39, RASGEF1B, CALM2, TIAM2, CAMK2G, DOCK1, GFRA1, RASGRP3, FARP1, RABGEF1, TIAM1, KIT, KALRN, ARHGEF3, GFRA2, NRG4, RASGRP1, ERBB4, CSF2RA, CALM1, ITSN1, DENND1C, ARHGEF33, GRIN2B, NEFL
1400	GO:0016298	lipase activity	GOMF	56	-0.0289199	0.835499	0.306954	0.57995	down	10434, 10908, 11057, 127018, 201164, 221955, 23236, 2822, 313, 3991, 5048, 5049, 5336, 55512, 55627, 57104, 80821, 8398	0.552725	PAFAH1B1, PNPLA6, LIPE, DDHD1, SMPD3, GPLD1, LYPLA1, AOAH, SMPD4, ABHD2, LYPLAL1, DAGLB, PAFAH1B2, PNPLA2, PLD6, PLCB1, PLA2G6, PLCG2
1074	GO:0003682	chromatin binding	GOMF	370	-0.0294324	0.832842	0.00858266	0.055374	down	10036, 1025, 1058, 10771, 10891, 10919, 10951, 11128, 116138, 128553, 132243, 148479, 1488, 1499, 1653, 1786, 1788, 1789, 201973, 2146, 222229, 22907, 23028, 23054, 23125, 23133, 23314, 23613, 23636, 2551, 25842, 25942, 2625, 29089, 29128, 2965, 3087, 3151, 3183, 3670, 3720, 4087, 4221, 4335, 4591, 473, 4762, 4773, 4998, 5111, 51176, 51322, 5308, 5422, 5469, 54828, 54881, 5563, 55818, 56254, 5745…	0.0513995	KDM1A, JARID2, TFAP2B, BAZ1B, ZMYND11, ISL1, RAD51, RNF4, SMARCD1, MNT, SMC1A, TP63, TOP2B, UBE2T, DDX1, SMARCA2, GRHL2, TDRD3, ORC1, DNMT3B, HNRNPC, CDC45, WAC, VRK1, ZMYND8, NFATC2, POLA1, EZH2, LHX2, TLE4, GATA3, SMC3, TRIM37, CBX1, CAMTA2, NSD2, PPARGC1A, GTF2H1, ASF1A, RNF8, CENPA, KDM3A, PHF13, SATB2, DNMT3A, RNF2, NCOA5, KLHDC3, DEK, TTF1, MED1, SOX15, AJUBA, DNMT1, TOP2A, DHX30, RAN, PCNA…
1062	GO:0004672	protein kinase activity	GOMF	428	-0.029526	0.832358	0.00470042	0.0332851	down	100130827, 1017, 1020, 1022, 1024, 1025, 10420, 10783, 11064, 1111, 11113, 127933, 1436, 1438, 1453, 1456, 1457, 145957, 1613, 166614, 1944, 2046, 2066, 2071, 2185, 23043, 23178, 2475, 2534, 2580, 26127, 26750, 27020, 27347, 282974, 283455, 29110, 2931, 2932, 2965, 29904, 29959, 3756, 3815, 3985, 4140, 415116, 4342, 4750, 4751, 4916, 494551, 5062, 5127, 51422, 5170, 51701, 51719, 5289, 5347, 5394…	0.0313165	CDKL5, CDK11A, BAZ1B, FYN, PRKCH, VRK2, PRKCQ, MAPK6, TESK2, CAMK2A, EPHA8, MARK3, MAP2K7, PIK3C3, MOK, STK17B, GSK3B, NLK, AURKA, SRPK1, CDC7, MAPK1, VRK1, RPS6KA5, CSNK2A1, RIOK3, CDK16, STK24, EEF2K, GSK3A, PRKAG2, MAPK8, GTF2H1, PRKAB1, FGFR1OP2, TTK, NRBP1, PASK, NEK2, CNTRL, NEK6, MASTL, PTK2B, CIT, CDK2, RIOK1, CDK8, CCNB1, CDK7, CCNH, ACVR1B, CAB39, BLK, RPS6KC1, CDK9, NEK1, CDK15, NTRK3,…
1503	GO:0051721	protein phosphatase 2A binding	GOMF	25	-0.0298745	0.830558	0.480783	0.743956	down	153090, 29966, 5520, 5770, 6772, 84930	0.714237	STAT1, MASTL, DAB2IP, PTPN1, STRN3, PPP2R2A
1429	GO:0030374	ligand-dependent nuclear receptor transcription coactivator activity	GOMF	42	-0.0304434	0.827626	0.352604	0.625494	down	10891, 135112, 170261, 23028, 23054, 23082, 5469, 55827, 8202, 87	0.59474	KDM1A, ACTN1, PPARGC1A, NCOA7, NCOA3, MED1, DCAF6, PPRC1, ZCCHC12, NCOA6
1294	GO:0043021	ribonucleoprotein complex binding	GOMF	98	-0.0305529	0.827063	0.155392	0.380186	down	127933, 2146, 219402, 22849, 24148, 2475, 253260, 26121, 3192, 51068, 54496, 54915, 55037, 58477, 6059, 64506, 6729, 6730, 708, 7458, 79048, 7917, 79631, 83939, 90459	0.349467	SRP54, PRPF6, ERI1, PRPF31, EZH2, EIF4H, CPEB3, C1QBP, MTIF3, PTCD3, PRMT7, EFL1, SRPRB, EIF2A, YTHDF1, UHMK1, HNRNPU, ABCE1, RICTOR, SRP68, NMD3, SECISBP2, MTOR, BAG6, CPEB1
1408	GO:0035064	methylated histone binding	GOMF	47	-0.030578	0.826934	0.323547	0.600944	down	10771, 10943, 11091, 11137, 124359, 148479, 222229, 23133, 29128, 359787, 57332, 5929, 81550, 9425	0.571029	MSL3, ZMYND11, TDRD3, PHF13, RBBP5, PWP1, CBX8, CDYL, LRWD1, CDYL2, PHF8, DPPA3, WDR5, UHRF1
1128	GO:0004888	transmembrane signaling receptor activity	GOMF	226	-0.0307573	0.826013	0.0309923	0.14117	down	10154, 10314, 1136, 1138, 1139, 1232, 1240, 1436, 1438, 1630, 1944, 2046, 2066, 2185, 219865, 22801, 22821, 2567, 2568, 26512, 26648, 2674, 2675, 27020, 2742, 2861, 2890, 2895, 2898, 2900, 2904, 2915, 2925, 3274, 3383, 342372, 3597, 3710, 3815, 390059, 4864, 4916, 4994, 51094, 57192, 57338, 5746, 57512, 5791, 5793, 5799, 5801, 59341, 6272, 65078, 6785, 6870, 7099, 7436, 79602, 81458, 8633, 91, 91…	0.128577	ADIPOR2, RTN4R, EPHA8, CHRNA3, ICAM1, MCOLN1, GABRP, ITPR3, GLRA2, INTS6, TRPV4, HRH2, LANCL1, ELOVL4, PTK2B, GRPR, IL13RA1, PTPRE, SORT1, ACVR1B, PLXNC1, TLR4, GABBR2, ITGA11, NTRK3, NPC1, EFNA3, PTH2R, PTPRG, VLDLR, GRIK4, GPR158, GFRA1, GRID2, PTPRR, JPH3, PTPRN2, GRIA1, NPTN, KIT, ADIPOR1, GRIK2, GFRA2, GRM5, CHRNA5, TACR3, GPR37, CMKLR1, CHRNA7, ERBB4, OR3A1, UNC5C, GABRG3, CSF1R, CCR3, OR51…
1319	GO:0016407	acetyltransferase activity	GOMF	82	-0.0307875	0.825858	0.19013	0.434654	down	11091, 11143, 117143, 157570, 27097, 38, 5049, 51126, 51616, 55226, 64841, 675, 6877, 6880, 79595, 79829, 79888, 80218, 8202, 8464, 9329, 9425, 9575	0.405357	ACAT1, GNPNAT1, NAA40, NAA50, NCOA3, GTF3C4, CLOCK, NAT10, TAF5L, KAT7, SAP130, BRCA2, TAF5, TADA1, CDYL, LPCAT1, PAFAH1B2, ESCO2, NAA20, TAF9B, SUPT3H, WDR5, TAF9
1326	GO:0008509	anion transmembrane transporter activity	GOMF	79	-0.0310578	0.824472	0.194654	0.439094	down	10227, 10257, 116369, 1183, 121601, 23657, 2567, 2568, 25932, 2742, 28231, 28232, 28234, 284129, 54020, 55144, 56172, 56262, 57030, 64849, 7416, 79751, 94015, 9497	0.407791	SLC4A7, CLCN4, GABRP, SLCO4A1, GLRA2, SLC17A7, MFSD10, SLCO1B3, SLC26A8, ABCC4, LRRC8A, TTYH2, SLC7A11, ANO4, ANKH, SLC13A3, SLC37A1, CLIC4, LRRC8D, SLCO3A1, SLC25A22, SLC26A11, GABRG3, VDAC1
1428	GO:0034062	RNA polymerase activity	GOMF	42	-0.0310779	0.824369	0.343172	0.614912	down	10621, 10622, 11128, 201973, 51095, 5422, 5440, 5442, 5558, 81488, 9412, 9477	0.58211	TRNT1, POLRMT, POLA1, POLR3G, MED20, POLR3F, PRIM2, POLR2K, POLR3A, MED21, PRIMPOL, POLR2M
1148	GO:0005085	guanyl-nucleotide exchange factor activity	GOMF	192	-0.0313603	0.822924	0.0424685	0.176143	down	100271715, 10125, 10160, 10451, 1102, 1438, 145957, 153020, 1793, 1794, 1894, 1967, 2066, 23268, 2534, 25780, 25782, 26084, 26230, 26269, 2674, 2675, 27342, 2904, 3815, 4747, 50650, 51622, 54869, 54874, 57221, 57580, 5877, 5924, 6103, 6453, 7074, 79958, 801, 805, 815, 818, 81846, 83874, 84079, 8440, 84904, 8567, 8729, 8874, 89781, 8997, 9267, 9732, 9844, 9922	0.158292	FYN, CAMK2A, NCK2, TBC1D10A, HPS4, ARHGEF7, ANKRD27, DNMBP, GBF1, CYTH1, MADD, EIF2B1, ARFGEF3, RASGRF2, ECT2, ARHGEF26, RAB3GAP2, CCZ1, PREX1, DOCK4, EPS8L1, SBF2, VAV3, DOCK2, RCBTB2, ARHGEF39, FNBP1L, RASGEF1B, CALM2, IQSEC1, TIAM2, CAMK2G, DOCK1, GFRA1, RASGRP3, FARP1, RABGEF1, ELMO1, TIAM1, RPGR, KIT, KALRN, ARHGEF3, FBXO8, GFRA2, NRG4, RASGRP1, ERBB4, RABIF, CSF2RA, CALM1, ITSN1, DENND1C, A…
1114	GO:0099600	transmembrane receptor activity	GOMF	240	-0.0313889	0.822777	0.0235476	0.117818	down	10154, 10314, 1136, 1138, 1139, 1232, 1240, 1436, 1438, 1630, 1739, 1944, 2046, 2066, 2185, 219865, 22801, 22821, 2567, 2568, 26512, 26648, 2674, 2675, 27020, 2742, 2861, 2890, 2895, 2898, 2900, 2904, 2915, 2925, 3274, 3383, 342372, 3597, 3710, 3763, 3815, 390059, 4864, 4916, 4994, 51094, 57030, 57192, 57338, 5746, 57512, 5791, 5793, 5799, 5801, 59341, 6272, 65078, 6785, 6870, 7099, 7436, 79602, …	0.107839	ADIPOR2, RTN4R, EPHA8, DLG1, CHRNA3, ICAM1, MCOLN1, GABRP, ITPR3, GLRA2, INTS6, NCALD, SLC17A7, TRPV4, HRH2, LANCL1, ELOVL4, PTK2B, GRPR, IL13RA1, PTPRE, SORT1, ACVR1B, PLXNC1, TLR4, GABBR2, ITGA11, NTRK3, NPC1, EFNA3, CALM2, PTH2R, PTPRG, VLDLR, GRIK4, GPR158, GFRA1, GRID2, PTPRR, JPH3, PTPRN2, GRIA1, NPTN, KIT, KCNJ6, ADIPOR1, GRIK2, GFRA2, GRM5, CHRNA5, TACR3, GPR37, CMKLR1, CHRNA7, ERBB4, OR3…
1463	GO:0016597	amino acid binding	GOMF	29	-0.0328829	0.815173	0.405592	0.675211	down	123169, 27244, 2742, 2904, 5917, 6472, 7529, 83667, 9731	0.645315	SESN1, GLRA2, RARS, CEP104, SESN2, LEO1, YWHAB, SHMT2, GRIN2B
1457	GO:0004879	RNA polymerase II transcription factor activity, ligand-activated sequence-specific DNA binding	GOMF	29	-0.0330711	0.814221	0.403045	0.673805	down	2100, 2649, 4824, 5915, 7068, 9572	0.643183	RARB, NR1D1, ESR2, NR6A1, THRB, NKX3-1
1460	GO:0098531	transcription factor activity, direct ligand regulated sequence-specific DNA binding	GOMF	29	-0.0330711	0.814221	0.403045	0.673805	down	2100, 2649, 4824, 5915, 7068, 9572	0.643183	RARB, NR1D1, ESR2, NR6A1, THRB, NKX3-1
[truncated: 157 more rows]

## Sheet: MeSH
	Id	Name	ConceptType	#Genes	Coeff	OddsRatio	P-Value	FDR	Direction	SigGenes	FDR2
1812	904254	Collagen	MeSH	33	0.151576	2.56506	1.97056e-23	1.95578e-20	up	10491, 1277, 1278, 1284, 1289, 1291, 1292, 1293, 1634, 2331, 3688, 4313, 5351, 649, 667, 6678, 7057, 7077, 780, 80781, 871	1.04144e-20
[truncated: 1,056 more rows]

## Sheet: GOBP
	Id	Name	ConceptType	#Genes	Coeff	OddsRatio	P-Value	FDR	Direction	SigGenes	FDR2	SigGenes_external_name
[truncated: 3,201 more rows]
