# Supplementary material for: Single-oocyte transcriptional profile of early-stage human oocytes reveals differentially expressed genes in the primordial and transitioning stages
Source: Research Square preprint supplement (doi:10.21203/rs.3.rs-6957514/v1), 2025-07-03
Supplement: Supplementary file 3 [file 72075e9bf367a5189a830d49.xlsx]

## Sheet: oocyte133_144genes
	Sample_3799.JM.50	Sample_3799.JM.63	Sample_4311.JM.120	Sample_4311.JM.126	Sample_4311.JM.127	Sample_4311.JM.133	Sample_4311.JM.136	Sample_4311.JM.140	Sample_4311.JM.143	Sample_4311.JM.145	Sample_4311.JM.146	Sample_4311.JM.147	Sample_4311.JM.148	Sample_4311.JM.149	Sample_4311.JM.154	Sample_4311.JM.155	Sample_4311.JM.156	Sample_4311.JM.16	Sample_4311.JM.160	Sample_4311.JM.161	Sample_4311.JM.162	Sample_4311.JM.163	Sample_4311.JM.164	Sample_4311.JM.165	Sample_4311.JM.168	Sample_4311.JM.177	Sample_4311.JM.179	Sample_4311.JM.184	Sample_4311.JM.192	Sample_4311.JM.24	Sample_4311.JM.25	Sample_4311.JM.27	Sample_4311.JM.28	Sample_4311.JM.31	Sample_4311.JM.34	Sample_4311.JM.35	Sample_4311.JM.37	Sample_4311.JM.39	Sample_4311.JM.46	Sample_4311.JM.51	Sample_4311.JM.56	Sample_4311.JM.63	Sample_4311.JM.64	Sample_4311.JM.70	Sample_4311.JM.71	Sample_4311.JM.73	Sample_4311.JM.96	Sample_4311.JM.97
MMP11	3.91995	-0.529285	-0.529285	1.20431	-0.529285	-0.529285	0.767334	-0.529285	2.75194	-0.529285	-0.529285	-0.0284954	-0.0119039	-0.529285	-0.529285	-0.529285	2.61187	-0.529285	-0.529285	0.937949	0.115023	-0.529285	-0.529285	-0.529285	-0.529285	-0.529285	-0.529285	-0.529285	1.20104	-0.529285	-0.529285	-0.529285	0.744199	-0.529285	1.70825	-0.529285	2.01485	-0.529285	-0.529285	-0.529285	-0.529285	0.546978	-0.529285	-0.529285	-0.529285	-0.529285	-0.529285	1.22361	NA
ATP6V0A4	-0.707342	1.89156	-0.707342	-0.707342	-0.707342	1.48975	-0.707342	-0.707342	-0.707342	-0.707342	1.06842	-0.297474	-0.707342	-0.707342	-0.707342	0.992758	-0.707342	-0.707342	-0.707342	-0.707342	1.26366	-0.707342	-0.153632	-0.707342	1.86267	1.93413	-0.707342	1.81617	0.708832	1.61569	-0.707342	0.251801	-0.707342	-0.707342	-0.241861	0.40365	1.20471	-0.707342	-0.707342	0.768143	-0.707342	2.13288	-0.707342	-0.707342	-0.707342	-0.707342	-0.707342	-0.707342	NA
KCTD6	-2.59148	0.446061	0.164982	0.324061	0.783923	0.284323	-1.24942	-2.59148	0.796671	-1.7754	0.357881	0.173097	-0.592572	0.57401	0.253009	-0.511263	-0.576996	0.586143	0.426841	-0.939943	0.408409	0.565762	-2.59148	0.674016	-0.178295	0.81183	0.933577	0.366523	-2.59148	-1.97126	0.607329	0.35917	0.562463	0.498699	0.306093	0.431497	0.238286	-2.59148	0.131331	0.356847	0.50068	-2.59148	-0.0483716	0.180838	-2.59148	0.588378	0.605119	0.410487	NA
ABRACL	-0.765264	-0.765264	-0.765264	-0.765264	-0.765264	1.98211	-0.765264	-0.765264	0.754782	-0.765264	-0.765264	1.22138	-0.765264	1.44226	-0.765264	-0.765264	0.0277842	-0.765264	0.590759	-0.765264	-0.765264	-0.765264	-0.765264	-0.765264	-0.765264	-0.765264	-0.765264	1.40311	-0.765264	0.30014	0.266273	0.620474	0.74058	-0.765264	1.13163	-0.765264	1.0158	-0.765264	1.49723	-0.765264	1.96028	-0.765264	1.47859	-0.765264	-0.765264	-0.765264	-0.765264	1.705	NA
FBXW4	-0.0955751	-1.13591	-1.87833	-0.465453	0.898533	-0.970945	0.796653	0.720957	0.367893	-1.87833	0.697192	0.516591	0.652277	0.847682	0.708278	-0.667273	0.525856	0.525336	0.858882	-1.87833	0.392875	-1.87833	0.443843	0.200771	1.29543	0.766627	1.21834	0.577791	0.473762	0.740808	0.0165805	0.101465	0.685723	1.03162	0.600751	-0.248387	0.682459	0.456861	1.01519	0.281464	0.331642	0.727976	0.392769	-1.87833	1.06053	1.15786	0.606761	0.92534	NA
TNFAIP2	-0.53955	-0.53955	-0.53955	-0.53955	-0.53955	2.00691	0.436416	-0.53955	1.46571	-0.53955	-0.53955	-0.53955	-0.53955	2.00304	-0.53955	-0.53955	2.25126	1.11198	-0.53955	-0.53955	-0.53955	-0.53955	-0.53955	-0.53955	-0.53955	0.616882	3.75229	0.82251	-0.53955	1.69011	-0.53955	-0.53955	-0.53955	-0.53955	-0.53955	-0.53955	1.79425	2.11873	1.45719	2.08145	1.5099	-0.53955	2.4057	-0.53955	1.65577	1.52878	-0.53955	-0.53955	NA
RNF43	-0.305945	-0.305945	0.828126	-0.305945	-0.305945	-0.305945	-0.305945	-0.305945	4.23147	-0.305945	-0.305945	-0.305945	-0.305945	-0.305945	-0.305945	-0.305945	-0.305945	-0.305945	-0.305945	-0.305945	-0.305945	-0.305945	-0.305945	-0.305945	-0.305945	-0.305945	-0.305945	2.67011	2.1044	-0.305945	-0.305945	2.86659	1.83394	-0.305945	-0.305945	4.10935	2.80423	-0.305945	0.924864	-0.305945	-0.305945	-0.305945	-0.305945	-0.305945	-0.305945	-0.305945	-0.305945	-0.305945	NA
ZNF415	-1.74995	-1.74995	0.744567	1.04166	0.806383	0.511453	-0.9578	-1.74995	0.680878	-1.74995	-0.0364708	0.726607	-1.74995	0.958959	-1.17721	0.311793	0.903628	0.770233	0.312761	0.712951	-0.134306	-1.74995	0.958543	1.0779	0.688791	-1.74995	-0.114293	0.208661	0.480518	0.801753	0.108409	0.259343	0.491695	0.725845	0.891831	0.172178	-0.384919	0.773521	0.592228	0.248199	1.02843	-1.74995	-1.74995	-1.74995	-1.74995	-1.74995	0.51506	1.06944	NA
ZNF782	-1.27375	-0.734826	-2.18794	0.675164	0.721289	0.404849	-2.18794	0.023352	0.522277	0.329003	0.67286	0.300243	-0.0259796	0.060399	-1.22154	0.331035	-0.353461	0.622244	-0.859845	0.592	-0.59579	0.784588	0.640461	-1.00527	-0.333603	1.19662	0.41697	0.134162	-0.102725	0.211455	0.806492	0.188557	-0.644125	1.09362	0.0806862	0.0956078	0.59587	-2.18794	0.605135	0.790542	-0.28073	-0.548445	0.974308	-2.18794	0.736856	0.196372	-2.18794	-0.751291	NA
GXYLT1	0.923682	0.742367	-1.31257	-1.31257	1.08192	0.862849	0.505895	-0.466642	0.670605	-0.371287	-1.31257	-1.31257	0.976187	-0.542236	-1.31257	-1.31257	-1.31257	0.704537	0.658412	-1.31257	0.527998	-1.31257	1.03012	-1.31257	-1.31257	-1.31257	-1.31257	0.453858	0.365578	1.133	1.01465	0.714	0.357001	-0.513122	0.531379	0.542672	0.791075	-1.31257	0.979659	1.02448	-0.0162651	-1.31257	1.01218	1.1269	0.0958638	-1.31257	-1.31257	-1.31257	NA
PLXNA2	-0.831017	-0.831017	0.403445	-0.831017	-0.831017	0.523317	0.702759	0.908647	1.47726	-0.831017	-0.831017	1.34151	-0.362114	-0.831017	0.767592	0.754189	-0.831017	-0.156044	1.10195	-0.831017	1.54045	0.114375	1.18048	-0.831017	-0.831017	-0.831017	-0.831017	1.18312	1.16777	1.60515	0.850377	1.33666	-0.831017	-0.831017	-0.831017	1.98619	-0.831017	-0.831017	1.89407	-0.831017	1.36644	-0.831017	-0.831017	-0.831017	-0.831017	-0.831017	-0.831017	1.23151	NA
CCDC102A	-0.825796	1.64469	-0.825796	0.758527	-0.825796	-0.825796	-0.825796	-0.825796	-0.825796	0.330844	-0.825796	1.29757	1.70084	1.63782	-0.308078	1.53292	0.741689	-0.825796	-0.825796	-0.248029	-0.825796	1.25994	1.07388	-0.825796	1.94354	1.3062	-0.825796	1.44502	0.903619	1.75135	1.18151	-0.193378	1.1761	-0.825796	-0.825796	1.43373	-0.825796	-0.825796	0.454735	-0.825796	-0.825796	1.83121	1.7058	0.674625	0.784873	1.5905	-0.825796	1.80418	NA
LINC00342	-0.446073	-0.446073	-0.446073	2.55871	-0.446073	-0.446073	-0.446073	-0.446073	2.60814	-0.446073	-0.446073	2.3891	-0.446073	2.07353	-0.446073	-0.446073	1.65429	-0.446073	1.63317	-0.446073	-0.446073	0.450819	-0.446073	-0.446073	-0.446073	-0.446073	-0.446073	2.04763	1.72073	-0.446073	0.897768	1.73834	-0.446073	-0.446073	1.07478	1.86914	0.817969	-0.446073	2.5599	-0.446073	-0.446073	3.66348	1.42048	-0.446073	2.18825	2.92327	3.3723	-0.446073	NA
TRIM65	-0.888497	-0.888497	-0.888497	1.42695	1.44337	1.13944	-0.888497	-0.888497	-0.888497	1.68928	-0.888497	1.3604	0.997625	0.980854	-0.888497	0.284236	-0.326121	-0.888497	1.15352	-0.888497	-0.0864925	-0.0138098	0.972559	1.74636	-0.888497	1.21949	1.60276	0.538251	0.314312	-0.888497	1.18447	0.849256	0.179345	0.0895108	1.32374	1.64509	0.604711	-0.888497	1.47204	1.83953	0.0908751	-0.888497	-0.888497	-0.888497	1.31305	0.428973	-0.888497	-0.888497	NA
MSH6	-0.0348211	-0.636133	-1.87704	0.199894	0.776513	-2.76353	0.345695	-0.984709	0.528028	-0.377162	-1.65059	0.613482	0.166322	0.121119	0.497155	0.415183	0.341103	-0.320695	0.374471	0.0455751	-0.471483	-0.129735	0.0812569	0.00371454	-0.124139	-2.17475	-3.47389	0.574404	0.60503	0.355877	0.955818	-0.345663	0.803402	-0.491869	0.909968	0.0683699	0.347166	1.34949	0.601529	0.53068	-0.0258793	0.354816	-0.754795	0.715222	-0.172918	0.418912	-0.118	0.391773	NA
AC093297.2	-0.323752	-0.323752	-0.323752	-0.323752	-0.323752	-0.323752	-0.323752	-0.323752	2.25687	-0.323752	-0.323752	1.50307	3.6257	-0.323752	-0.323752	-0.323752	-0.323752	3.82507	3.25992	0.91337	-0.323752	-0.323752	-0.323752	-0.323752	1.17733	-0.323752	-0.323752	-0.323752	-0.323752	-0.323752	1.10642	-0.323752	-0.323752	-0.323752	-0.323752	-0.323752	-0.323752	-0.323752	-0.323752	1.5161	4.3574	4.39469	-0.323752	-0.323752	-0.323752	-0.323752	3.99841	-0.323752	NA
PUS7L	1.06282	0.970586	0.0439316	1.24885	1.23281	0.732501	-1.40847	-1.40847	-0.0901469	-1.40847	-1.40847	0.615514	0.316705	-1.40847	0.614314	0.887879	1.08923	0.76681	0.203129	0.421534	0.00446823	-0.457548	0.545045	1.77804	-1.40847	-1.40847	-1.40847	0.587286	-0.625175	-0.14928	0.752674	-0.0579961	0.231869	-1.40847	0.58051	1.28179	-1.40847	1.56997	-0.439934	-1.40847	0.606538	-1.40847	-0.0496742	0.949132	0.897752	0.784595	0.994889	-1.40847	NA
STMN1	1.60213	-1.59668	0.0987722	0.212921	0.818571	-0.239205	-0.213758	-1.74117	2.55819	0.558934	-0.526162	0.6691	0.109324	1.71889	-0.333501	-0.432903	0.447234	0.28856	1.83974	1.20916	0.349573	0.526901	0.277806	-0.0560102	-0.628778	-2.62895	-1.91252	0.90306	-0.704819	-0.572588	-1.18833	0.721478	0.0773999	-0.0576552	-0.0216301	0.121409	-0.17471	0.226456	0.468966	1.70396	0.014848	-0.350151	-1.52109	0.0170034	1.88203	0.193156	1.17468	-0.0619236	NA
ARHGEF28	0.592026	0.769853	0.0458033	0.832228	-0.341723	-0.178754	-1.36982	0.792656	0.741877	-1.31727	-0.355154	0.0798177	0.773267	0.248023	-0.972494	0.706121	-0.120305	1.17227	0.235495	0.0484142	0.291263	-2.69604	-1.30061	-2.69604	-0.854488	0.239663	1.16428	0.44056	0.0527361	0.741789	0.283255	0.0203522	0.041921	0.387432	-0.407431	0.446743	-0.486955	-2.69604	0.726127	0.727966	0.483968	-0.0106426	0.791968	-1.18	-0.448128	-2.69604	0.0390993	-0.605305	NA
TTC34	-0.675955	-0.675955	-0.675955	-0.675955	-0.675955	-0.0519086	1.49497	-0.675955	2.01956	-0.675955	1.28286	-0.160192	0.345042	-0.675955	-0.675955	1.49553	-0.675955	-0.675955	-0.675955	0.445209	1.82923	1.27131	1.44137	-0.675955	-0.675955	-0.675955	-0.675955	0.668267	1.74796	1.27183	1.55294	-0.675955	-0.675955	-0.0108384	2.43338	-0.675955	1.15806	-0.675955	1.14015	0.268998	-0.675955	-0.675955	-0.675955	-0.675955	-0.675955	-0.675955	0.753739	-0.675955	NA
WHAMMP3	1.84109	2.25045	-0.503435	0.834019	-0.503435	-0.503435	-0.503435	-0.503435	1.93998	-0.503435	-0.503435	2.4941	-0.503435	-0.503435	-0.503435	2.80242	-0.503435	-0.503435	-0.503435	2.17781	-0.503435	-0.503435	-0.503435	-0.503435	-0.503435	-0.503435	-0.503435	-0.503435	1.16587	-0.503435	-0.503435	-0.503435	0.758332	-0.503435	-0.503435	-0.503435	1.39968	-0.503435	2.13577	-0.503435	-0.503435	-0.503435	2.79585	-0.503435	-0.503435	-0.503435	-0.503435	-0.503435	NA
YPEL2	0.873589	0.437576	-0.807087	0.534718	0.293553	-0.461849	0.428656	-1.52423	-0.0836831	0.490247	-0.586675	-0.59228	-0.00191395	-0.216886	-0.542052	0.708709	-0.816385	0.517708	-0.319664	-0.169901	0.226986	0.0709416	-0.266661	-1.04541	-0.231588	-0.172909	1.02622	0.977139	0.641791	-0.460236	-0.644518	0.516381	0.284919	0.69731	0.296908	0.424819	-2.07585	-4.57045	-0.569297	0.636861	-1.69169	0.598038	-0.882395	-4.57045	-0.121113	-0.239633	-1.04617	0.843554	NA
GCOM1	0.122156	-0.86965	-0.86965	-0.86965	0.220201	-0.86965	-0.86965	-0.86965	-0.0917025	1.77374	0.768944	0.42962	1.42425	-0.86965	-0.86965	0.00446862	-0.163033	-0.86965	1.57766	-0.86965	-0.86965	0.455162	-0.86965	-0.86965	-0.86965	-0.86965	0.208922	0.92304	0.815634	-0.86965	-0.86965	-0.86965	-0.22661	0.942567	-0.86965	1.36582	1.48656	-0.86965	1.72148	1.96983	-0.86965	-0.86965	1.574	0.291684	1.94176	-0.86965	-0.86965	-0.86965	NA
ALDH16A1	0.773368	-1.02415	-1.02415	1.32909	1.08149	-1.02415	1.86136	-1.02415	1.00879	-0.394815	0.671585	0.846425	1.1314	1.3465	-1.02415	0.805362	1.5565	1.58972	1.0822	-1.02415	-0.260713	-1.02415	0.249391	0.645346	-1.02415	-1.02415	-0.207027	0.665938	0.920208	0.231522	1.09157	0.219539	1.55037	0.348782	-0.0547413	1.07322	1.65142	-1.02415	0.503103	1.12704	1.81465	-0.16508	-1.02415	-1.02415	-1.02415	0.470341	-1.02415	1.17249	NA
ZNF606	1.53785	-1.04452	-0.142366	-1.04452	-1.04452	-1.04452	0.132786	-1.04452	-0.0734851	-1.04452	-1.04452	-1.04452	1.50899	0.782392	0.308319	1.63466	0.99463	-1.04452	-0.00326415	-1.04452	-1.04452	-1.04452	-0.430234	-0.258315	-1.04452	-1.04452	-1.04452	-0.000645214	-1.04452	0.303354	0.179168	0.300587	0.846126	-1.04452	1.22206	0.974687	1.13006	2.0786	0.261571	1.48787	0.36635	-1.04452	1.06141	-1.04452	-1.04452	-1.04452	-1.04452	0.475612	NA
GLIS2	-0.724947	-0.724947	1.69437	1.77355	-0.724947	-0.724947	0.46099	-0.724947	1.47827	-0.724947	0.23788	1.30577	-0.724947	-0.724947	-0.724947	1.68495	-0.724947	2.22489	1.88042	-0.0347514	-0.724947	-0.724947	1.66215	-0.724947	-0.724947	-0.724947	1.14202	1.21169	1.75632	1.22925	1.37957	-0.724947	0.5531	-0.724947	-0.724947	-0.724947	1.32052	-0.724947	1.4112	1.74006	-0.724947	-0.724947	0.63837	-0.724947	-0.724947	1.95727	-0.724947	0.512973	NA
ZNF160	-1.34171	-1.34171	-1.34171	0.787879	1.03213	0.937303	0.853574	-1.34171	0.659052	-1.34171	-0.723477	0.0448357	-0.900065	-0.140376	-1.34171	-0.878776	1.19513	1.17585	0.765598	0.371879	0.891894	0.536611	0.521178	1.23205	-1.34171	-1.34171	-1.34171	0.223634	0.737638	0.537045	0.88344	0.699945	0.782402	-0.105929	0.139332	0.727507	0.702657	0.736357	0.988305	0.906988	1.155	1.52275	0.393002	-1.34171	1.0618	-1.34171	0.908759	-1.34171	NA
ITGA7	-0.474023	-0.474023	-0.474023	2.26197	-0.474023	-0.474023	-0.474023	-0.474023	1.55587	-0.474023	-0.474023	2.22626	-0.474023	0.763712	-0.474023	-0.474023	-0.474023	-0.474023	-0.474023	-0.474023	-0.474023	-0.474023	-0.474023	-0.474023	-0.474023	-0.474023	-0.474023	1.53706	2.50111	-0.474023	1.44164	1.7248	2.13575	-0.474023	-0.474023	-0.474023	-0.474023	-0.474023	-0.474023	-0.474023	1.82802	2.53778	3.13424	-0.474023	-0.474023	-0.474023	-0.474023	-0.474023	NA
LRRN2	-0.281348	4.73902	-0.281348	-0.281348	-0.281348	1.82156	1.2705	-0.281348	1.85172	-0.281348	-0.281348	-0.281348	-0.281348	-0.281348	-0.281348	-0.281348	-0.281348	0.954454	-0.281348	-0.281348	-0.281348	-0.281348	-0.281348	-0.281348	-0.281348	-0.281348	-0.281348	4.03196	4.29975	-0.281348	-0.281348	-0.281348	-0.281348	-0.281348	-0.281348	3.62044	-0.281348	-0.281348	3.75182	-0.281348	-0.281348	-0.281348	-0.281348	-0.281348	5	-0.281348	-0.281348	0.827933	NA
PRRT1	2.60356	-0.691338	2.26125	-0.691338	-0.691338	-0.691338	-0.691338	-0.691338	1.04997	-0.691338	2.13332	0.747307	1.79876	1.13502	-0.691338	-0.691338	2.35422	-0.691338	-0.691338	1.1821	2.11456	-0.691338	-0.129171	2.04238	0.0694892	-0.691338	-0.691338	0.923261	-0.691338	1.39384	1.39317	-0.691338	-0.691338	-0.154709	0.797304	1.15655	0.647789	-0.691338	1.32834	-0.691338	1.81527	-0.691338	2.02869	2.0872	0.203007	1.45567	2.2747	-0.691338	NA
KITLG	0.592383	1.05974	-0.953522	-0.357683	-0.953522	1.76461	-0.953522	-0.953522	0.729899	-0.953522	-0.953522	-0.953522	0.082625	1.07406	0.714429	-0.953522	-0.953522	0.48583	-0.953522	0.97293	-0.953522	-0.953522	-0.953522	0.508732	-0.953522	-0.953522	-0.953522	0.93651	0.718672	1.40835	0.160821	0.763636	-0.953522	-0.953522	0.807054	1.28155	0.512196	-0.953522	0.0127742	-0.953522	-0.953522	-0.953522	1.38383	1.95001	0.368615	-0.953522	-0.953522	1.37276	NA
KLHL4	2.53547	-0.438731	-0.438731	-0.438731	-0.438731	-0.438731	-0.438731	-0.438731	0.973694	-0.438731	-0.438731	-0.438731	-0.438731	1.95175	1.66783	2.26134	0.866752	3.08655	-0.438731	2.81273	2.5604	-0.438731	3.17069	1.4663	-0.438731	-0.438731	-0.438731	0.806473	-0.438731	1.52183	-0.438731	1.93325	-0.438731	-0.438731	-0.438731	-0.438731	-0.438731	3.62344	0.52866	-0.438731	-0.438731	-0.438731	-0.438731	-0.438731	-0.438731	-0.438731	-0.438731	-0.438731	NA
KLHL42	2.0622	-0.21088	0.458676	1.38059	-1.00062	-1.00062	-1.00062	-0.400819	1.03137	-1.00062	-1.00062	0.765614	-1.00062	-1.00062	-1.00062	0.771758	1.09988	-1.00062	0.742708	-1.00062	-0.442047	-0.3797	1.50306	-1.00062	-1.00062	-1.00062	-1.00062	0.897348	1.03976	1.00444	0.649318	0.556391	0.50519	-1.00062	0.837947	0.31747	0.70851	-1.00062	1.36577	1.06549	1.23982	-1.00062	1.18059	-1.00062	1.49458	-1.00062	0.666615	0.683938	NA
ZBTB10	0.987323	0.488305	-0.132482	-1.5301	1.05077	-0.961046	-0.651793	-1.5301	0.6381	-1.5301	-1.5301	1.18719	0.464757	0.534079	1.52075	-1.5301	-0.256262	0.870333	0.846559	-1.5301	0.355846	-0.857463	-0.0316749	-1.5301	-1.5301	0.971445	-1.5301	0.557026	-0.0278792	0.641958	0.442048	0.638875	-0.120624	0.73373	-1.5301	-0.782451	1.03748	-1.5301	0.960223	1.39386	-0.224735	-1.5301	0.93012	1.24279	0.445546	0.331266	-1.5301	0.961923	NA
DAB2	1.59737	1.2998	-0.706335	-0.706335	-0.706335	2.27422	-0.706335	-0.0793173	2.04739	-0.706335	-0.706335	0.816293	2.08606	1.82813	-0.0935276	1.78034	2.24281	0.906931	0.533053	-0.706335	-0.706335	-0.706335	-0.706335	-0.706335	-0.706335	0.495973	1.14356	1.00725	1.2396	0.789802	0.975009	0.465237	0.122687	-0.706335	0.256945	1.6031	-0.0827711	1.68896	1.69683	2.39353	2.16445	0.823655	2.69253	-0.706335	1.63139	1.24824	1.03655	-0.706335	NA
AMPD2	-1.44668	-1.44668	-1.44668	0.217672	-1.44668	0.559428	0.902748	-1.44668	0.493513	0.798717	-1.44668	0.329053	0.529122	0.524156	0.239186	0.126242	0.580339	0.557722	-0.2452	0.656744	-1.44668	0.100927	0.751767	-1.44668	-1.44668	-0.922535	-1.44668	-0.665345	0.596467	1.12215	-0.0681264	0.591835	0.551144	0.846182	-1.44668	-1.44668	-1.44668	-1.44668	0.649606	0.648492	-0.6529	-1.44668	0.33368	0.956305	-1.44668	1.27984	0.498753	0.380188	NA
FAM118B	-0.140778	-0.14122	-1.68147	-0.398118	-0.268585	-0.271513	-1.75706	-1.42993	-1.5093	-0.661595	-1.57333	-0.331726	0.667035	0.0439322	-0.309043	-0.655692	-0.844337	1.12906	-0.514889	-1.44225	-1.19705	-0.771344	-0.554511	-0.3379	-5	0.282627	0.571956	0.561353	-1.90344	0.86011	-0.0280244	0.0281304	-0.904474	-0.91535	-0.191628	-0.151118	-0.323331	0.728124	-0.129765	1.09383	-0.561462	0.086898	0.367662	-0.434613	-0.641364	0.431838	-0.00985557	-0.401632	NA
CHRM3	-0.526412	-0.526412	2.25821	-0.526412	0.604804	2.30713	-0.526412	-0.526412	1.31129	-0.526412	-0.526412	-0.526412	-0.526412	2.00539	-0.526412	-0.526412	-0.526412	-0.526412	2.48352	-0.526412	0.178189	-0.526412	-0.526412	-0.526412	-0.526412	-0.526412	-0.526412	-0.526412	-0.526412	-0.526412	-0.526412	0.755164	-0.526412	-0.526412	-0.526412	-0.526412	2.15143	-0.526412	2.53443	2.28094	2.94982	2.1812	3.14037	-0.526412	3.47603	-0.526412	2.39793	-0.526412	NA
KCNQ1OT1	1.60217	0.415014	0.703656	1.67634	0.853599	0.247073	1.67441	-1.23	1.37545	0.593763	1.05267	1.3544	1.03896	1.09438	1.40426	0.395759	1.40365	0.360483	1.48925	1.12858	1.0433	-1.23	-0.00196855	-0.516562	0.343272	0.442754	1.42084	0.651692	1.30779	1.06056	-0.511221	-0.00939063	1.04409	0.56089	1.32324	1.04533	1.2662	1.07664	1.24744	1.07817	1.40695	1.14141	0.613442	-1.23	1.00171	1.44249	1.03036	0.214283	NA
NEIL1	-0.805564	-0.0312579	-0.805564	-0.805564	-0.805564	1.56658	2.04153	-0.805564	1.6463	-0.805564	1.62898	0.242636	0.999928	-0.805564	-0.805564	-0.805564	0.746522	0.293925	-0.805564	-0.805564	-0.805564	1.2884	1.01592	-0.805564	-0.805564	-0.805564	-0.805564	1.30483	0.665204	1.27728	0.502071	0.721016	-0.286785	-0.256632	1.25247	-0.805564	1.6079	2.52006	1.41192	-0.805564	0.187209	2.14414	0.137835	-0.805564	-0.805564	1.68708	-0.805564	-0.805564	NA
AL845472.1	-1.08106	1.85086	1.05324	-1.08106	1.11147	0.0203529	-1.08106	0.404243	0.82559	0.905262	0.931221	0.953962	-1.08106	0.285982	0.379718	-1.08106	-1.08106	-0.178972	-1.08106	0.980801	0.0774463	-1.08106	-1.08106	-1.08106	-1.08106	-0.146901	-1.08106	-0.31414	-1.08106	0.717014	-0.0244041	-1.08106	-0.341792	0.907375	-0.0357612	1.04727	-0.247654	0.699143	0.944737	2.21762	-1.08106	-1.08106	-1.08106	-1.08106	-1.08106	-1.08106	-1.08106	-1.08106	NA
CHML	0.997135	2.26135	1.77611	1.76564	0.799628	-0.891203	0.853194	-0.891203	-0.891203	0.498258	-0.891203	0.720017	0.599641	-0.254892	-0.891203	-0.891203	1.57912	-0.891203	0.931041	0.753491	1.225	-0.891203	-0.891203	-0.891203	-0.891203	1.20142	-0.891203	-0.891203	1.61965	0.638927	0.214943	0.848913	1.12551	1.73066	0.592003	1.49158	-0.18199	-0.891203	1.3572	-0.891203	-0.891203	-0.891203	1.06478	2.20709	1.16316	-0.891203	-0.891203	1.51799	NA
SLC16A1	-1.48606	-0.387556	-1.48606	0.891274	1.16289	-1.48606	-1.48606	0.701322	1.07012	0.469068	-1.48606	1.02494	0.0367686	0.91242	-1.48606	-1.48606	0.994961	0.519963	1.37043	-0.832924	-1.48606	-1.48606	-0.900497	-0.237596	-0.186186	-1.48606	0.949529	0.778948	0.685381	0.616713	-1.48606	0.600528	0.613223	-1.48606	0.189403	-0.501769	0.880251	-1.48606	1.10611	0.511328	1.3196	1.28184	0.156379	1.14778	-0.227841	-1.48606	1.13534	-0.907449	NA
SERPINE2	-2.12052	0.580718	0.290704	1.18408	0.604692	0.671802	0.212878	0.527075	0.818172	-0.71375	0.479576	-0.230286	0.450693	0.115955	0.871279	0.530133	0.40482	0.922058	-0.469998	-2.25794	-0.0800446	0.090766	-0.0847239	0.00751029	-1.52016	-0.563678	0.713106	0.86535	-2.31708	0.88629	0.202999	0.924218	1.10944	-1.67718	0.253381	1.18771	1.0643	0.760822	1.53478	0.7049	0.851477	0.72071	0.898886	1.93962	0.944533	0.726672	0.800178	-0.540971	NA
MOBP	-0.875129	0.254502	0.542936	1.96852	1.80123	0.937218	-0.875129	-0.875129	1.21104	-0.875129	-0.875129	-0.875129	-0.875129	0.952925	-0.875129	-0.392435	1.09258	-0.875129	0.145566	-0.875129	-0.875129	-0.875129	-0.875129	-0.875129	1.28462	-0.875129	-0.875129	1.15755	0.202023	-0.875129	0.72993	0.511682	1.28364	-0.875129	1.40639	0.137053	0.87957	-0.875129	0.262399	0.981276	-0.875129	-0.875129	-0.875129	-0.875129	-0.875129	-0.875129	-0.875129	-0.875129	NA
REST	-0.273474	-0.138077	0.536567	0.11502	0.233681	-0.171876	0.484994	0.0564861	0.558026	0.352088	0.257021	0.860158	0.348572	0.246887	0.850362	0.672513	0.849737	0.276487	0.328334	-0.455959	0.00913606	-0.0134865	0.368336	-2.01897	0.406304	0.391264	-2.92071	0.805145	-0.344836	-0.327209	0.751017	0.0183374	0.511696	-0.231333	-0.399182	-0.396234	0.619549	-2.92071	0.920833	0.00932083	-0.0283888	0.528856	0.924175	0.139524	-0.141773	0.722454	0.49816	0.38873	NA
HERC2	0.325036	0.833538	0.0389852	0.808413	0.723849	-1.05706	0.140005	-0.541117	0.641498	-0.812918	-1.56381	1.07983	0.485121	0.673887	-0.115018	0.43846	0.75327	0.688192	0.723865	0.0855482	0.519971	-0.597335	-0.353895	0.671378	-2.56944	-2.56944	-0.724688	0.558156	0.602426	-0.172217	0.66295	0.362489	0.499805	1.01064	0.350487	0.432434	0.735265	0.80557	0.894037	0.881787	-1.78362	0.756714	0.524331	-1.51645	0.809025	-0.271266	-2.56944	0.0448402	NA
JCAD	-0.633287	-0.633287	0.664587	-0.633287	0.0422106	-0.633287	1.91344	-0.633287	2.11529	-0.633287	-0.633287	0.428491	-0.633287	1.28392	-0.633287	0.157258	0.879184	1.92955	1.68717	0.0857485	-0.633287	-0.633287	1.60522	-0.633287	-0.633287	-0.633287	-0.633287	2.31247	2.47346	1.79256	1.22263	0.778298	-0.633287	-0.633287	-0.633287	1.12839	-0.633287	2.15366	2.44703	-0.633287	-0.633287	-0.633287	-0.633287	-0.633287	-0.633287	2.56425	-0.633287	-0.633287	NA
SEMA6D	0.575368	-0.155848	0.835025	-0.083898	-0.765373	0.0891352	0.122475	-0.433468	0.891498	-1.53664	-1.53664	-1.53664	-1.53664	-1.53664	-0.052894	-0.257053	-0.461237	1.47177	0.651112	-0.715663	0.785353	-1.53664	0.084871	0.354925	-1.53664	-1.53664	-1.53664	0.458419	0.862751	1.25213	0.910942	0.999485	1.17058	1.02992	0.468819	0.639186	-0.207882	2.78177	0.882442	-1.53664	0.599965	-1.53664	0.986689	-1.53664	1.36644	2.32632	1.01514	0.939263	NA
STK36	0.97093	0.988081	-0.104241	-0.953159	1.59655	-0.953159	-0.953159	-0.953159	1.17879	-0.953159	-0.334357	-0.953159	0.122528	-0.953159	-0.953159	1.42793	0.205737	0.696121	0.764959	0.93704	-0.953159	-0.953159	1.42133	-0.953159	-0.953159	-0.953159	-0.953159	0.786601	0.272431	1.42208	0.67292	0.659979	-0.43169	-0.953159	1.02292	0.810145	-0.953159	-0.953159	1.36312	1.01855	-0.953159	-0.953159	0.320373	1.92265	2.06849	-0.953159	-0.953159	1.43577	NA
TBC1D19	1.43267	-1.00921	1.33165	1.05597	-1.00921	-0.469187	-1.00921	-1.00921	1.07972	-0.306522	0.96208	1.12719	-0.548104	0.920201	-1.00921	0.315128	1.29139	-1.00921	1.09639	-0.336678	1.27324	1.27486	0.31911	1.3455	-0.193183	-1.00921	-1.00921	0.507225	0.269209	-1.00921	1.10363	0.591429	-1.00921	-1.00921	1.19957	-0.299705	0.427072	-1.00921	0.696051	-1.00921	-1.00921	-1.00921	1.64261	-1.00921	1.08702	-1.00921	-1.00921	-1.00921	NA
SLC38A10	-1.52467	0.960173	-0.173477	0.0614006	-1.52467	-0.85404	-0.179079	-1.52467	0.933667	-1.52467	-1.52467	1.23929	0.724758	1.10091	-0.172124	0.72266	0.71973	1.22348	1.08421	0.716291	0.969646	0.250735	0.605232	-1.52467	-1.52467	-1.52467	1.24916	1.00484	1.16515	0.378367	0.564993	0.748481	1.09811	-1.52467	1.1134	1.24133	1.60019	0.931315	1.09743	-1.52467	-0.918003	0.551905	0.792495	-0.550861	0.989693	1.13542	-0.106337	0.656688	NA
SLC39A8	0.339798	1.72219	-1.14501	0.988717	0.930434	1.39531	-1.14501	-0.369446	1.01465	0.261352	-1.14501	0.862667	-1.14501	1.2247	0.552157	-0.152904	1.10266	0.77043	0.975799	1.079	0.270251	0.965062	0.427432	1.4754	-1.14501	-1.14501	-1.14501	-0.0513503	-0.487803	0.853592	0.961888	1.01354	0.879203	0.459083	0.264891	1.07675	1.19519	-1.14501	0.614432	-1.14501	0.762111	-1.14501	-1.14501	1.20057	1.301	-1.14501	0.772924	-1.14501	NA
COL4A2	1.03455	0.374868	1.25651	0.917589	0.504899	1.02956	1.54121	0.46334	1.07148	-0.36587	0.742646	1.27199	0.711283	1.06471	0.443734	0.985107	1.64554	0.805836	1.11521	-0.158372	0.381807	1.18562	0.998687	0.913941	-0.29596	-1.96945	-1.11387	0.781854	1.29363	0.981516	0.824095	0.290946	0.453652	-1.42971	0.825367	0.430778	0.754554	0.702857	1.28136	0.498455	1.24575	1.58745	1.85184	0.867221	1.52191	-0.0527065	0.818947	-1.14552	NA
ERG28	0.881601	0.124452	-1.9481	-0.155378	-1.73073	0.0327287	1.49732	-0.742362	-0.804369	-0.649981	-0.372971	1.15217	0.362942	0.17019	0.790671	-0.390956	0.986372	0.31287	0.855367	0.356449	0.231199	-0.663954	-0.357224	1.1878	0.56884	1.14717	0.772771	0.541532	-1.56575	-0.0959586	-0.27885	0.440503	0.135257	0.426162	0.701922	-1.22294	0.408837	0.75735	0.57268	0.244714	0.0635002	-0.3932	0.917445	0.392472	0.468384	0.238052	0.0863326	0.333812	NA
WSB1	0.115592	1.34855	0.157417	0.545833	0.881162	-0.132404	0.702725	0.126331	0.926002	-0.936855	-1.75476	0.49472	0.616641	0.307283	0.549574	0.656092	0.694006	0.67978	0.68395	-1.2075	0.445866	-0.257652	0.39011	-0.0229546	-1.51101	0.855415	0.581628	0.416644	0.0213937	0.673972	0.49203	0.172904	0.758558	-0.130263	0.578648	0.292083	0.649231	1.02225	1.0804	0.218507	1.37442	1.40245	1.21366	1.08817	1.60259	0.748004	-0.700396	0.138073	NA
PVT1	2.11534	0.908929	1.31329	1.52828	0.0812473	-1.36386	-1.36386	-0.104823	0.73348	1.0397	-1.36386	1.42261	1.36152	1.27962	1.37244	0.800952	0.784363	1.75349	-0.18642	0.27442	-0.381838	-1.36386	1.1587	-1.36386	-1.36386	1.3237	-1.36386	0.383139	0.701484	0.577938	0.540968	0.235921	0.268337	-1.36386	0.706428	0.440252	0.464517	-1.36386	0.725024	1.28985	0.231537	0.128668	1.45848	-1.36386	1.37589	-1.36386	1.30187	-1.36386	NA
SOX4	1.14676	0.939827	0.931147	-0.399529	0.471737	-0.0921857	1.07634	-0.372853	1.0285	-0.374094	-0.18343	0.27078	0.416239	0.111208	-0.0976061	-0.520766	1.36745	0.814475	-0.977484	0.0299955	0.571218	-0.128823	0.485426	-0.255543	-2.08441	0.523512	1.16737	0.348449	1.50561	0.662014	0.294047	0.938559	-0.278923	0.778235	-0.466466	0.701398	-0.0513304	1.97333	1.47547	0.339013	1.15622	1.31048	1.3002	0.303689	0.795288	1.05461	0.980918	0.712922	NA
ZNF66	0.649856	1.76135	-0.931606	-0.931606	1.37512	-0.931606	2.45107	-0.931606	1.01815	0.473942	0.0478292	0.991497	0.74961	-0.0724786	-0.931606	-0.15968	1.05418	-0.931606	1.52366	1.41138	0.297027	-0.931606	-0.931606	1.01443	-0.931606	-0.931606	-0.931606	0.651501	-0.931606	1.11619	1.50767	0.518094	0.969291	0.595795	1.09841	-0.931606	1.4355	2.46558	1.83206	1.58923	1.21298	2.09181	0.455228	-0.931606	0.639177	-0.931606	1.70592	-0.0143586	NA
COL14A1	0.28047	2.03647	1.52444	1.80373	-0.924782	0.530032	2.00446	1.11455	1.53224	-0.304589	-0.924782	0.784628	-0.924782	0.97406	0.14799	1.42682	1.51251	1.70998	1.06584	0.229348	-0.0088802	0.866441	0.967276	-0.924782	0.983937	1.26556	1.23962	1.26424	1.45214	1.41048	0.28533	1.06515	0.614233	-0.924782	-0.245953	0.372953	0.160514	2.01341	1.51765	-0.924782	1.5208	1.96084	1.89726	1.18209	1.46282	1.67755	1.42361	-0.924782	NA
ZNF135	-1.21261	-1.21261	-1.21261	1.10008	-1.21261	1.13855	0.00206958	0.818316	0.596626	-0.584604	-1.21261	0.710215	-1.21261	1.05315	1.27589	0.613042	-1.21261	0.421509	0.889301	0.890424	-0.160799	-0.381744	0.583122	-1.21261	-1.21261	-0.598316	-1.21261	-0.0736917	0.389625	0.64958	-0.357841	0.814584	-0.483995	-1.21261	0.888803	-0.578511	-0.113641	-1.21261	0.524833	-0.724693	-0.282303	1.76692	1.38102	-0.334644	1.03012	-1.21261	-1.21261	-1.21261	NA
FMO1	-0.322401	-0.322401	0.615318	3.59131	-0.322401	-0.322401	-0.322401	3.78883	-0.322401	0.773069	-0.322401	-0.322401	2.9208	-0.322401	-0.322401	-0.322401	3.31811	-0.322401	-0.322401	-0.322401	-0.322401	-0.322401	-0.322401	-0.322401	-0.322401	-0.322401	-0.322401	-0.322401	-0.322401	1.86332	-0.322401	-0.322401	-0.322401	-0.322401	-0.322401	-0.322401	-0.322401	-0.322401	-0.322401	-0.322401	3.37861	-0.322401	3.31734	-0.322401	-0.322401	3.81204	3.72719	-0.322401	NA
HERC2P2	0.654035	-1.11768	-1.11768	0.787446	0.389753	-0.325782	1.35232	1.08321	1.25062	-1.11768	-1.11768	1.44774	1.79244	0.553595	1.58798	1.79425	0.741028	0.618728	1.89057	1.07537	0.859937	0.398554	1.23382	0.282479	-1.11768	-1.11768	-1.11768	0.919919	0.696357	1.01633	1.81342	0.912426	1.1734	-1.11768	0.830931	0.0644828	1.37872	0.515846	1.5309	0.892046	1.49685	1.96218	1.63639	1.21491	-1.11768	1.19623	0.0912538	0.620245	NA
CORO2A	1.94454	-0.95805	1.43657	0.827832	-0.95805	1.5456	-0.95805	-0.95805	0.973675	1.07217	-0.95805	0.21811	-0.95805	0.981015	0.855208	0.480977	-0.95805	-0.95805	0.0536631	0.863935	1.42367	1.19105	0.999997	-0.95805	-0.95805	-0.95805	-0.95805	1.00257	0.109623	-0.95805	0.32137	-0.95805	-0.419603	1.07379	-0.95805	0.673036	-0.95805	-0.95805	-0.95805	1.63849	-0.95805	-0.95805	-0.95805	-0.95805	-0.95805	-0.95805	-0.95805	0.845277	NA
GSTA1	3.49739	-0.594136	-0.594136	1.51924	-0.594136	-0.594136	0.814944	-0.594136	1.24001	2.61391	2.26387	1.41384	0.143064	2.48668	1.42185	-0.594136	1.62031	-0.594136	1.9862	2.92323	-0.594136	1.7298	1.34707	1.69934	3.35121	1.51037	0.351761	1.04234	1.97775	-0.594136	0.651124	-0.594136	-0.594136	-0.594136	0.528046	1.36635	-0.594136	-0.594136	1.10861	-0.594136	1.64621	-0.594136	-0.594136	-0.594136	-0.594136	-0.594136	1.18281	2.22354	NA
PRSS35	-0.474411	-0.474411	-0.474411	-0.474411	-0.474411	-0.474411	-0.474411	-0.474411	-0.474411	-0.474411	-0.474411	-0.474411	2.38569	2.01055	-0.474411	1.38089	2.67978	-0.474411	-0.474411	-0.474411	1.56507	-0.474411	0.328795	-0.474411	-0.474411	-0.474411	-0.474411	-0.474411	-0.474411	1.01898	-0.474411	-0.474411	-0.474411	2.76954	1.71406	1.97577	-0.474411	-0.474411	2.25662	-0.474411	0.502188	-0.474411	2.6357	-0.474411	-0.474411	3.25348	-0.474411	-0.474411	NA
TMEM45A	2.10077	-0.641453	2.2043	1.72547	-0.641453	-0.641453	0.58871	2.00268	1.58229	-0.641453	-0.641453	-0.641453	1.53423	1.78416	2.12122	-0.126928	1.89577	0.961017	0.656018	0.0744813	-0.641453	2.00706	0.957742	-0.641453	-0.641453	-0.641453	1.59155	-0.641453	0.173758	1.59957	0.734445	-0.641453	-0.0624022	-0.641453	-0.641453	-0.641453	-0.641453	2.31767	1.50566	1.96803	-0.641453	-0.641453	2.23101	-0.641453	-0.641453	-0.641453	-0.641453	1.89267	NA
FLRT3	-0.324439	-0.324439	-0.324439	-0.324439	-0.324439	-0.324439	-0.324439	-0.324439	3.13684	2.65858	-0.324439	-0.324439	-0.324439	-0.324439	3.61625	-0.324439	2.19019	-0.324439	-0.324439	1.30765	-0.324439	-0.324439	-0.324439	-0.324439	-0.324439	-0.324439	-0.324439	-0.324439	-0.324439	1.02638	2.87325	0.913916	-0.324439	-0.324439	-0.324439	-0.324439	-0.324439	-0.324439	1.59165	-0.324439	4.42465	3.84631	1.33955	-0.324439	4.89567	-0.324439	-0.324439	-0.324439	NA
KMT2A	1.58916	0.730525	-1.16603	1.23833	0.466096	1.04634	-1.16603	-1.16603	1.14961	-1.16603	0.914409	0.204147	1.41193	0.722063	-0.182492	1.03403	0.636941	0.693736	0.693732	1.02222	0.633247	0.628503	0.510594	0.145158	0.0587636	-1.16603	1.85608	0.763477	1.04639	1.33699	1.35439	0.104673	0.193952	-1.16603	0.739099	1.33983	0.926557	0.81934	1.73749	-1.16603	1.51667	1.89688	0.241864	0.718155	1.10276	1.12537	1.14583	0.952586	NA
PLEKHG2	2.41646	-0.442973	-0.442973	-0.442973	2.63968	-0.442973	-0.442973	-0.442973	1.87997	-0.442973	2.20491	-0.442973	2.30161	0.241331	-0.442973	-0.442973	2.48208	-0.442973	1.39759	-0.442973	-0.442973	-0.442973	2.01729	-0.442973	-0.442973	-0.442973	-0.442973	-0.442973	2.37518	-0.442973	-0.442973	-0.442973	-0.442973	-0.442973	0.513649	-0.442973	2.03604	3.54194	1.51173	-0.442973	1.54301	2.41634	2.4609	-0.442973	3.14063	-0.442973	1.35319	1.71096	NA
SETD5	-0.482658	0.902443	1.21827	-0.0949095	-0.869907	-0.111812	0.751156	-1.08856	1.11786	0.202475	1.14225	-0.285777	1.0735	0.00582048	1.00927	1.11965	1.5414	0.573316	-0.0877879	0.752399	-0.088337	-0.283162	-1.01636	0.360495	-1.3476	1.63296	-1.48161	-0.195171	0.240666	1.0457	0.542206	0.0920042	0.818954	-0.201221	-0.00841275	1.16732	0.498018	1.09707	1.14331	0.740105	0.0528442	-1.11246	-1.36183	0.696565	0.696212	0.485027	0.653925	0.941474	NA
ARHGEF2	-0.396773	-0.396773	-0.396773	-0.396773	-0.396773	-0.396773	1.33257	1.61908	-0.396773	-0.396773	-0.396773	2.03437	-0.396773	-0.396773	-0.396773	-0.396773	-0.396773	-0.396773	-0.396773	-0.396773	2.6719	-0.396773	-0.396773	-0.396773	-0.396773	-0.396773	-0.396773	1.87258	2.99399	2.75362	-0.396773	-0.396773	-0.396773	-0.396773	-0.396773	-0.396773	-0.396773	-0.396773	1.69218	3.9813	4.08369	-0.396773	1.9057	-0.396773	-0.396773	-0.396773	-0.396773	-0.396773	NA
TOP3A	-1.04415	-1.04415	-1.04415	-1.04415	-1.04415	-1.04415	0.48802	-1.04415	0.924179	0.567136	1.54482	1.13971	1.30167	0.224768	-0.476308	1.42014	-1.04415	1.77462	-0.0811112	-1.04415	0.715165	-1.04415	-1.04415	-1.04415	-1.04415	-1.04415	0.981746	0.319036	0.759004	1.43353	0.554093	0.639578	1.28444	-1.04415	-0.566537	0.635352	0.863344	-1.04415	0.27115	0.131987	-1.04415	-1.04415	0.405592	1.73156	-1.04415	-1.04415	-1.04415	-0.216259	NA
LIMCH1	-0.431532	-1.75748	0.706108	1.12088	0.863675	0.423357	0.77428	1.05549	0.891323	0.268335	-1.75748	0.54421	0.579479	0.245995	0.772722	-1.75748	0.185981	-0.0320381	-0.0788231	-0.13653	0.642256	0.72344	0.866762	0.972714	-1.75748	-1.75748	-1.75748	-0.121231	0.568155	0.265701	1.02694	0.259805	0.834898	-1.19862	0.635928	1.03311	0.579275	-1.75748	1.09439	-0.0613655	0.547651	0.944079	0.817403	-1.75748	-1.75748	0.740188	-1.75748	0.336418	NA
BCAT1	0.533509	-0.856306	1.29133	-0.856306	-0.856306	1.46414	1.32909	-0.290595	1.5023	0.484572	-0.264111	0.304353	-0.433262	1.01437	-0.856306	-0.41287	1.34431	0.722057	1.30142	1.26493	0.484226	-0.856306	1.24494	1.64609	-0.856306	-0.856306	1.4446	1.20758	0.722589	-0.856306	0.913265	0.612208	0.563918	1.31336	-0.856306	-0.205367	0.461418	1.02179	1.13109	-0.856306	1.63299	1.62555	0.695306	0.888716	-0.856306	1.46279	0.806168	-0.856306	NA
SYNDIG1	-0.452974	4.68037	0.550684	-0.452974	1.4031	-0.452974	-0.452974	-0.452974	2.80322	-0.452974	-0.452974	-0.452974	-0.452974	-0.452974	-0.452974	2.29585	-0.452974	-0.452974	0.743127	-0.452974	-0.452974	-0.452974	-0.452974	-0.452974	-0.452974	-0.452974	-0.452974	1.2567	-0.452974	-0.452974	-0.452974	1.28978	-0.452974	-0.452974	-0.452974	2.6161	-0.452974	-0.452974	-0.452974	1.21595	-0.452974	-0.452974	-0.452974	-0.452974	-0.452974	-0.452974	1.05945	-0.452974	NA
COL4A1	1.53296	1.61858	0.265162	1.58354	-0.71157	-0.71157	2.05427	0.110782	2.15405	-0.71157	1.3946	1.15781	0.67364	1.20767	-0.71157	2.06558	1.93861	1.31943	2.0843	-0.71157	0.618041	2.03578	-0.71157	-0.71157	1.17926	-0.71157	-0.71157	1.48851	1.0298	1.12077	-0.00407996	-0.71157	0.793841	-0.71157	-0.0116842	0.713469	1.43447	2.09797	1.8966	-0.71157	1.84826	2.07369	2.67437	-0.71157	2.34623	1.47054	1.2383	-0.169409	NA
FNDC3B	1.09012	0.357675	-0.146015	0.339887	-1.24266	1.01964	0.935421	-0.230084	0.703666	-0.0752226	-0.955235	-0.0857441	-0.149547	-0.486421	0.486197	0.259975	0.0654462	0.176221	0.0721851	0.11961	0.163791	-0.345848	-0.0737885	-1.67018	-3.71581	0.390592	0.753302	0.480218	0.109247	0.227649	-0.308125	-0.336754	-0.171741	0.082834	-0.100081	0.387142	-0.825769	-3.71581	-0.0564471	0.144521	1.15927	1.33238	0.794607	0.768751	0.962543	0.892609	0.32617	0.151996	NA
SLMAP	0.708616	1.33043	-1.47614	-1.47614	0.550218	-0.716445	-0.20207	-1.47614	-0.0721948	-1.47614	-1.47614	0.990915	0.97883	0.628435	-0.00249249	-0.0618217	0.862559	0.517433	1.03493	0.0887713	0.738809	0.869308	-1.47614	-0.45871	-0.221427	0.947881	-1.47614	1.11343	0.317739	1.14317	-0.0686761	0.135846	0.568325	0.876196	0.6094	0.739497	0.170925	-1.47614	0.901852	1.44293	0.44957	-1.47614	1.74296	0.542553	-1.47614	1.16046	-0.31637	0.810184	NA
WDR45	-0.0912726	0.934117	1.12155	1.77966	0.943356	-1.04781	1.62004	-1.04781	0.362218	-1.04781	1.43273	-0.337688	1.40721	1.21996	1.30935	0.666355	1.17817	0.86282	0.592194	1.1642	1.25678	0.56687	-1.04781	1.06231	1.77355	-1.04781	1.78813	0.984428	-1.04781	1.44294	1.36515	0.595854	0.0534841	-1.04781	0.00809063	0.993114	0.70961	1.68146	1.50309	0.950596	1.3592	0.93971	1.87372	-1.04781	1.72419	0.228672	1.63798	0.912191	NA
	NA	NA	NA	NA	NA	NA	NA	NA	NA	NA	NA	NA	NA	NA	NA	NA	NA	NA	NA	NA	NA	NA	NA	NA	NA	NA	NA	NA	NA	NA	NA	NA	NA	NA	NA	NA	NA	NA	NA	NA	NA	NA	NA	NA	NA	NA	NA	NA	NA
SERPING1	0.194926	0.41271	1.13568	0.54795	0.311828	1.022	1.46788	1.09927	0.29334	0.88017	0.246159	0.902694	0.826384	0.810864	0.866458	0.436245	1.04439	1.42177	0.318063	0.294488	1.00375	0.83912	0.358087	0.509447	0.784243	1.2935	1.55278	0.257118	0.322722	1.54479	0.917187	0.32496	-0.408064	0.165716	0.0255004	0.94228	-0.642449	1.95761	1.09934	1.33039	1.47714	0.602371	1.82054	1.16837	0.928482	1.62226	1.6112	0.127401	NA
NELFE	-0.644103	-0.838868	0.766516	0.442301	0.211482	0.0225795	0.379048	-1.08835	0.607505	1.63631	1.09222	0.917856	0.702828	0.615706	0.780364	-0.183083	0.549455	-0.497472	0.699405	3.06852	1.5225	0.663563	1.47464	1.13804	1.12923	1.59224	-0.0348402	0.414265	-2.66102	-1.11772	-0.399842	-0.625777	-0.0181305	1.65469	-0.476465	0.512122	-0.00574513	-0.163594	-0.316117	-0.93517	0.518997	-1.98927	-2.61522	-0.0820926	-0.334432	-0.389349	0.811936	0.339544	NA
CUL9	-1.23297	1.17599	1.01918	-0.271822	-1.23297	-1.23297	1.47189	0.332418	0.475996	-1.23297	-1.23297	1.46122	1.26467	0.371366	0.314031	-1.23297	1.36753	-0.178087	0.549688	1.19441	0.507567	0.818131	0.314453	-1.23297	1.26619	-1.23297	1.42775	0.736748	1.13582	0.828558	0.279986	0.430335	1.10529	0.857441	0.690367	1.08081	0.859551	-1.23297	0.772646	-1.23297	-1.23297	-1.23297	-0.0174079	-0.608114	1.73022	-1.23297	-1.23297	1.39512	NA
	NA	NA	NA	NA	NA	NA	NA	NA	NA	NA	NA	NA	NA	NA	NA	NA	NA	NA	NA	NA	NA	NA	NA	NA	NA	NA	NA	NA	NA	NA	NA	NA	NA	NA	NA	NA	NA	NA	NA	NA	NA	NA	NA	NA	NA	NA	NA	NA	NA
SHQ1	-3.49721	-3.49721	-0.444143	0.499662	0.525602	0.296543	-2.02979	-0.343117	0.0920209	-0.625158	0.0894436	0.434577	0.740451	0.397823	0.397581	0.159334	0.169804	0.475866	0.0964004	-0.858577	0.185086	0.370985	0.409856	0.190816	-3.49721	-0.116932	-1.18712	-0.618315	-0.584001	0.218796	0.693742	-0.136735	0.343304	-0.494184	-0.163853	0.152291	0.149896	-0.742094	-0.135575	0.535699	0.968326	-0.695147	-3.49721	-0.442059	0.468707	-0.106321	-3.49721	0.212413	NA
AC091074.2	-0.456263	3.3245	-0.456263	-0.456263	2.02774	-0.456263	-0.456263	-0.456263	-0.456263	-0.456263	-0.456263	-0.456263	2.5315	-0.456263	-0.456263	-0.456263	-0.456263	1.86157	-0.456263	-0.456263	-0.456263	-0.456263	2.80692	-0.456263	-0.456263	-0.456263	-0.456263	-0.456263	-0.456263	-0.456263	-0.456263	-0.456263	0.381282	-0.456263	-0.456263	-0.456263	0.928936	3.17068	1.5177	-0.456263	-0.456263	-0.456263	-0.456263	-0.456263	-0.456263	-0.456263	-0.456263	-0.456263	NA
OPCML	-1.02918	-1.02918	-0.406135	-1.02918	-1.02918	1.64081	-0.165824	-1.02918	-1.02918	0.866526	-1.02918	0.691602	1.28509	-0.176754	0.663829	-0.528534	-1.02918	-1.02918	-1.02918	-1.02918	1.29811	-1.02918	-1.02918	-1.02918	-1.02918	-1.02918	-1.02918	-1.02918	1.31778	-0.19741	0.683489	-1.02918	0.684421	-1.02918	0.98501	0.929549	1.06771	-1.02918	-0.0483686	-1.02918	-1.02918	-0.0356195	-1.02918	-1.02918	-1.02918	-1.02918	-0.0903046	1.04108	NA
PPP2CA	-0.767489	0.601456	-1.43921	0.312552	0.482491	1.21128	-1.35582	-0.572997	-0.00124829	-1.27904	0.253185	0.427131	0.216713	0.184219	-0.142825	-0.411813	-0.809709	-0.139991	-0.513748	-3.78008	0.0764478	-0.0640489	0.021675	0.83012	0.178569	0.701979	-0.566066	-0.953486	-4.60867	-0.0210759	0.0925475	-0.0889222	-0.638207	-1.41116	0.154502	-0.331888	-0.166611	-1.51219	-0.691564	0.322861	0.222466	-2.24873	-2.71863	-0.123579	0.333505	-0.18279	-2.91086	0.237747	NA
SNX10	-1.72112	0.323937	0.195912	0.842301	-1.72112	0.443163	-0.116668	-1.72112	-1.07179	0.430759	0.0578539	0.355911	0.456208	0.838277	0.416779	0.729617	0.473608	-1.72112	0.553953	-0.7638	0.786165	-0.269787	0.7961	1.26972	0.607181	-1.72112	-1.72112	-0.710112	-0.45968	0.265737	0.761161	0.101338	0.229753	-0.147202	0.711062	0.0937612	0.0588257	0.798587	-0.597215	-1.72112	-1.72112	1.10666	-1.72112	0.887439	-1.72112	0.175478	-0.826753	1.03099	NA
KIF11	0.901039	0.186147	0.547261	0.0124785	-3.53085	0.460779	-3.53085	-3.53085	0.431952	-2.13678	-1.10256	-0.507979	0.0611633	-0.0602749	-0.238052	0.267372	0.0108384	-0.372806	0.352009	0.266018	-0.157711	-0.101708	-0.465282	-0.00239318	-0.087894	-1.28735	0.383823	-0.673808	-0.570366	0.876401	0.649825	-0.0936808	0.406854	0.0530316	0.407613	0.25024	-0.152911	0.934713	-0.135988	-0.616135	0.649843	-1.73478	0.554467	0.951733	0.0955185	0.459675	-0.27344	-0.680086	NA
IMPA1	-2.02458	0.298157	-1.20647	0.685317	0.869795	0.572793	-1.44244	-1.38043	0.00440637	-3.64148	-2.07975	0.0666799	0.140608	0.0345646	-0.552452	0.237248	0.805219	0.36876	-0.222205	-1.21541	0.431796	0.0711182	-0.105527	-0.064792	-0.709098	-0.135647	-0.192028	-1.63034	-1.92601	-0.431895	0.330777	0.43748	0.539667	-0.110825	0.428954	-0.403994	0.0597359	-4.74731	-0.868994	0.463856	0.45125	0.672548	0.466853	1.11791	-0.189641	-0.00927828	-1.64984	0.0259263	NA
NPNT	-0.576003	-1.24337	0.0580823	0.0654882	-0.768168	1.1219	-3.73527	1.08052	0.404072	-1.44829	-0.307226	0.430957	0.111247	-0.256435	-0.587314	-0.975288	-0.234572	0.125412	-0.34872	-0.512599	-1.58918	-0.442944	-0.178982	-0.486095	0.670086	-1.61799	-0.833754	0.185205	0.73782	0.421717	0.253022	0.487559	0.822954	0.568224	0.0613814	0.237183	1.1776	-3.73527	0.517748	0.591037	0.301709	0.0322457	0.37748	0.570346	-0.358672	0.672267	-3.73527	-0.334678	NA
ZNF595	-1.70198	-0.227007	-0.783283	0.12893	0.98229	-0.616335	0.187731	-0.777399	-0.614135	-1.28342	-0.0353454	0.440914	0.124857	0.731107	0.505858	-0.153623	-0.0725956	0.810149	-0.219157	-1.45913	0.572665	-1.51031	0.41061	1.64425	-1.05279	-0.991795	-0.604943	-2.12259	-1.66537	-0.516701	0.72698	1.10907	1.30382	-0.179132	0.1529	0.637257	0.836341	-3.19296	0.295679	0.760405	-1.29995	-0.989706	-0.220082	-0.0207368	-1.13152	0.0611021	-2.00827	-0.0725643	NA
DNAJA2	-0.110911	0.622153	-0.403476	0.211919	-0.0256868	0.959391	-3.27627	0.228203	-1.06475	-2.36137	0.0931052	0.159371	-0.442423	-0.0103358	0.15691	-0.456936	-0.0663974	-0.235693	-0.261467	-3.78116	0.298316	-0.470694	0.283847	0.179115	-0.0367562	0.122224	0.354604	-1.86117	-4.65792	0.426002	-0.66265	0.566269	-0.559803	-0.568241	-0.70445	-0.50475	-0.724939	-2.63833	-1.34567	0.550309	1.15814	0.0229027	-0.480816	0.724676	-1.46926	-0.263328	-2.6558	0.410425	NA
DNAJB6	-1.4357	-0.481392	0.474469	-1.08526	0.329303	-0.290495	-2.40029	0.279667	-1.00976	0.780743	-1.45085	-0.0809038	-0.0119438	-0.460872	0.599227	0.0139916	0.279167	-0.248717	-0.114223	-2.89637	0.0434087	0.584824	0.066282	-0.376522	-0.583081	-0.116607	0.738696	0.569795	-5	-0.578688	0.0918068	0.0687177	-0.395563	-0.0465375	-0.536519	0.115185	-0.466383	-3.08235	-0.806062	-0.713553	-0.241132	-0.401473	-1.54438	-0.372791	-0.683207	-0.64899	-1.44186	0.265081	NA
CDYL	0.918215	-4.09079	0.328886	0.934023	0.275881	0.35031	0.486136	0.785759	-0.31246	-1.82785	0.591446	0.207717	-0.0790262	-0.46749	-0.517275	-0.368156	0.610063	0.569481	0.037368	-0.924915	-0.0162484	-0.948453	-0.63475	-0.526587	-4.09079	-0.327719	-2.16494	0.0678589	0.233127	-0.237863	0.365021	-0.578743	0.220946	-0.136459	-0.490048	-0.699626	0.809441	0.213191	0.105983	0.0355479	0.652066	-2.60562	-0.10543	0.59287	-0.119108	-0.473342	-2.68736	0.00567482	NA
PRKAG2	-1.66064	0.425377	-0.805496	0.403626	1.23384	0.318417	-2.5343	-0.386735	-0.299811	-0.905957	-0.574917	-0.499461	0.869348	1.42115	0.482659	1.2808	-1.01453	-0.103704	0.205034	-1.20785	0.586204	0.0778531	-0.215107	-0.0744744	-0.936735	1.04146	0.15436	-1.89446	-1.08157	-0.564046	-0.0371926	0.466555	0.112698	-0.473126	-0.496982	-1.06319	-0.150581	-3.18932	-0.239432	-0.421484	-0.733246	-0.611106	-0.00875465	-2.47521	-2.42449	-0.888769	-1.12223	0.542433	NA
MORC4	0.650804	0.707001	0.336309	0.296069	-0.32033	0.791956	-1.17914	-0.0529401	0.408325	0.586287	0.0486753	0.176988	-0.163461	0.421502	-0.864604	0.652955	0.238133	-0.373022	-0.198243	0.487832	0.17975	0.301541	-0.0490274	0.767054	-0.109303	-1.43953	-0.393142	-2.01986	-0.11223	-1.08924	1.0126	0.87309	0.985986	-0.48347	0.786137	0.375313	0.145157	1.55046	0.410312	-0.306932	-0.787105	1.18663	0.190835	0.813538	-0.486622	-0.0984575	-3.69939	0.326329	NA
AFF1	-0.949246	-0.0252178	0.974174	-1.41003	-0.0732767	0.326574	-2.01291	-1.12117	0.42186	-1.00536	-1.64593	-0.026979	0.806324	0.124576	-1.18387	0.546827	-0.332351	0.0749455	-0.860584	0.442208	-0.57574	-1.59215	-0.244836	-1.90165	-1.13239	-0.848965	-1.87022	-0.905221	-1.35804	0.323331	0.710351	-0.246601	-0.0773413	-0.267468	-0.158405	0.0486271	0.194601	-0.787978	-0.0340745	0.35212	-0.228712	-0.178954	-1.76068	-0.0575757	0.0253474	-0.128279	-2.09202	0.782764	NA
PTH2R	-1.86019	0.823996	-1.28216	0.330509	0.43243	0.51941	-1.86019	0.471935	0.228684	-1.86019	-0.0824085	-0.263745	0.392312	0.16661	0.243553	0.645951	-1.28578	-0.504778	-1.17133	-1.86019	-0.729221	-0.369058	-1.00754	0.585652	0.178853	-1.86019	-1.86019	-0.402925	-0.631653	-0.0303075	0.317807	0.676255	1.08927	0.516793	0.456709	0.153687	0.190982	-1.86019	0.109952	0.786803	0.644828	-0.938417	0.459642	0.849022	-0.938385	0.973233	-1.86019	0.381095	NA
LCORL	0.690778	0.829005	0.587351	-0.808332	-0.601728	0.3216	-2.50316	-4.87389	-0.706774	0.493166	-0.444111	-0.562575	0.201233	-1.12116	0.0349926	0.363469	-0.0166982	0.0415577	0.615918	0.148309	-0.220901	-0.236245	0.230404	0.477156	0.615448	0.716025	-0.36969	-0.633858	-1.02875	-0.461443	0.329643	0.470759	0.324644	0.157217	0.536923	0.559863	0.660396	-4.87389	0.176969	0.369444	0.446243	0.425984	0.214912	1.5469	0.227897	0.394748	-1.13626	-0.346595	NA
CPEB1	-0.559435	0.0588433	0.633097	-1.42	0.234406	0.309222	-1.93864	-1.03944	-1.18277	-0.623663	-0.567325	-0.605584	0.516528	-0.3857	0.170249	0.183751	-0.573166	0.3855	-1.0933	-3.26448	-0.386261	-0.466958	-0.649176	-0.340074	-3.6081	0.779036	-0.14723	0.895446	-1.84141	-0.681854	-0.916432	-0.220506	-0.496914	-0.0359346	-0.21894	-0.507134	-1.12924	-3.62057	-1.13573	-0.695832	-2.66118	-1.86834	-1.92198	0.142441	-2.34292	0.26891	-0.957965	1.38131	NA
CCDC88C	-0.347796	0.694563	0.810039	-1.03186	-0.423731	-1.06748	-0.564751	-0.219293	-0.250536	1.18609	0.0466547	0.372833	-0.476068	0.656527	0.249591	0.432061	-0.717029	0.79816	0.636872	-0.0715407	0.461913	0.291376	0.139618	0.211307	0.619813	-0.996639	-0.0246316	0.217593	-0.182134	0.0465147	1.13764	0.502985	0.889904	0.150188	1.01357	0.932164	1.19087	-3.09949	0.742269	0.695122	-0.60777	-1.61697	-3.6027	0.656599	-1.54748	-1.11851	-1.52397	0.361047	NA
LRATD2	-1.60878	-1.60878	-1.60878	-1.60878	-1.60878	-0.254799	-0.808938	-1.60878	-1.60878	-0.0362256	-1.60878	0.107065	0.651068	0.677249	0.860665	0.960779	0.923605	-1.60878	0.215296	0.20276	0.429307	0.621	0.589039	-1.60878	-1.60878	-1.60878	-0.733257	0.168513	0.227588	-0.263364	-0.114855	0.468789	0.0233483	-1.60878	0.910237	0.368277	0.769923	-1.60878	0.358579	1.32434	1.29852	-1.60878	-1.60878	-1.60878	0.945985	-1.60878	-1.60878	0.660617	NA
CD164	-1.6792	0.763239	-0.893576	0.730968	-0.0267512	0.771108	-1.54007	-1.04045	0.676843	-1.89449	-1.31938	-1.11765	0.0701221	-1.3918	-0.567764	-0.341404	0.39977	0.218834	-0.540927	-1.91533	-1.31812	-0.56786	-1.11313	-1.10542	-1.35026	-1.14268	-0.26842	-1.69811	-1.4884	0.919787	-0.788967	-0.786214	-0.295032	-1.15025	-0.0293093	-0.582137	0.0473034	-0.794825	-0.138346	-0.44686	1.29662	0.74202	1.15418	1.4996	-0.127169	-0.244585	-2.45258	-0.369261	NA
SRSF12	0.366343	0.941333	-0.781142	-0.000372246	0.265691	-0.420166	-1.2315	0.878151	-0.0836928	0.537847	0.11938	0.831685	0.101992	0.411332	-0.0572471	0.108022	-0.792308	-0.994968	0.33079	0.671544	0.558299	0.326434	0.159431	1.29625	1.16504	-0.64308	-0.850763	0.259087	-0.1169	-0.0633563	0.232537	0.44375	0.149948	1.23506	0.774732	0.233152	0.450495	0.438767	-0.535433	0.0279092	-0.491172	0.0775562	-3.72549	-1.93193	0.231326	0.186967	-0.565273	0.505234	NA
HBS1L	-2.87291	-0.311799	-0.598528	0.796779	0.63448	1.07083	-2.31573	-0.982212	0.245179	-3.36105	0.264183	0.295808	0.204361	0.0862135	0.17825	-0.0660548	1.04454	0.63119	-0.0518151	-2.32207	-0.121263	-2.19103	0.413243	-0.324569	-1.09176	0.482758	-0.703043	-1.94588	-2.28915	0.68516	0.0171801	-0.405384	0.526832	-0.140357	-0.86818	-0.463427	-0.0468478	-1.53346	-0.915722	0.325883	0.476113	0.496645	-0.783168	-0.932423	-0.776367	-0.21391	-1.64662	-0.0946108	NA
SLK	0.028106	-0.0740288	0.861122	-0.766831	0.632188	-3.13602	0.462623	-3.13602	0.323105	0.227668	0.0274838	0.435587	0.321651	-0.208072	0.677708	-0.179265	-0.0971933	0.0428339	0.82685	-0.519622	0.15369	0.237719	-0.207242	0.927475	0.118769	-0.493677	-3.13602	0.524164	0.1439	-0.600601	0.339963	0.178588	0.19494	0.938061	0.149481	0.671752	0.399569	-3.13602	0.482372	-1.87663	-1.57623	0.187446	0.341217	-2.27618	-0.0964885	1.1746	-1.57821	0.195307	NA
GAB1	0.235681	1.00829	0.596457	-0.481295	-0.893223	-0.888563	-0.0541985	0.48821	0.837843	-2.50352	0.645187	-0.553263	0.586562	0.496218	0.0691323	-0.391365	-0.537333	0.359619	-0.562535	-0.168167	-0.258938	-0.324985	0.486436	0.345368	-0.0267369	0.197817	0.333002	0.163448	-0.904405	0.560577	0.120565	-0.0157754	-0.355899	-0.173619	0.758416	-0.0612686	0.380838	-0.496248	-0.163839	0.432206	1.03617	-0.68056	0.0289393	-4.09956	0.987937	0.428781	-0.552458	-3.15392	NA
HEXB	-2.36114	-0.580781	-0.589537	-0.458751	0.44101	1.09356	-1.72175	0.331158	-0.791223	-0.901481	-0.644873	-0.547658	-1.04472	-0.415416	-0.549507	-0.062062	-0.0893274	0.553051	-0.562245	-4.49044	-0.0548349	0.0200257	-0.607939	-1.03868	0.107653	0.536979	0.468454	-1.10533	-3.15	0.772736	0.0463934	0.701097	0.122429	-1.28309	-0.139201	-0.0900519	-0.22413	-0.775093	-0.100594	-0.795134	-0.865684	-1.43098	0.105554	-0.776317	-1.38166	-0.183784	-1.31719	1.04637	NA
LINC02359	-0.867181	-0.867181	-0.867181	1.04722	-0.0843273	-0.867181	-0.867181	-0.867181	0.552381	-0.867181	-0.867181	-0.867181	-0.867181	-0.867181	0.638858	-0.867181	1.14925	-0.867181	0.966393	-0.867181	-0.155677	-0.867181	0.2322	0.725686	1.76191	1.73302	-0.867181	1.15785	-0.867181	1.1638	-0.230863	1.30645	0.142979	-0.867181	1.35949	0.954679	-0.867181	-0.867181	0.862418	-0.867181	-0.867181	-0.867181	-0.867181	1.13056	-0.867181	-0.867181	2.29389	-0.867181	NA
BAZ1A	0.0324719	0.444824	0.382301	-0.422951	-0.0234405	-0.54041	-1.66575	-0.881615	-2.9563	-0.14487	-0.915914	-0.131587	0.11103	-0.390892	-0.211658	-0.355311	-1.57534	0.203881	-0.691894	-0.180267	-0.727028	-0.338296	-0.496753	-1.46083	-1.49141	-0.697077	-0.669087	0.91653	-0.940961	-0.765125	0.769714	0.391343	-0.0524811	-0.148412	0.677426	0.558313	0.309779	-0.124268	0.0173182	0.214977	-1.04466	-0.753443	-2.8181	-1.19526	-2.68482	-0.387342	0.429816	1.30993	NA
NOL4	-1.86111	0.407243	1.15886	-1.86111	1.06932	-0.0403007	-1.09111	0.575107	0.215003	0.572023	0.55365	0.112523	0.422717	-1.35285	-1.86111	0.740826	0.576767	0.902448	0.33164	-1.86111	0.817749	0.319578	-0.0643158	-1.86111	-1.10725	-1.86111	-1.86111	-0.30436	0.530385	0.906185	0.6657	0.608456	0.717424	1.08182	0.717538	1.22326	0.347674	-1.86111	0.584469	-0.287066	0.0716012	-1.86111	0.54183	0.805054	-1.86111	-0.0261122	0.369842	0.574061	NA
MAP2K1	-1.26628	0.168417	-0.131225	-0.550787	-0.112756	0.63986	-1.39332	-0.322134	-0.230591	-0.904039	-0.589779	-1.40682	-0.111889	0.695021	-0.154488	0.400743	0.607332	-0.395705	-0.304229	-2.81194	-0.414299	0.3223	0.0720162	-0.110512	0.188883	-0.0478688	-0.0150232	-0.971267	-1.73692	-0.479842	0.116222	0.744602	0.0298119	-0.892161	-0.0725943	-0.162717	-0.249843	-0.868978	-0.467292	0.901303	-1.09727	-1.50844	-1.88313	-0.167379	-0.793522	-1.38536	-2.66766	0.153151	NA
SLC39A11	0.0494259	-0.0996349	0.814881	-2.13365	-0.334973	0.551119	0.282409	0.501098	-0.237302	-0.129586	-0.0493804	0.740264	0.327526	-0.151115	1.05788	0.374472	0.702834	0.312019	-0.328231	0.44204	0.183359	-0.370832	-0.0860299	0.919249	0.525557	0.0652208	-3.56684	-0.0363587	-1.21872	0.146302	-0.454333	0.0249276	0.392222	0.400394	0.358162	-0.0745282	0.405187	-1.77963	0.268084	0.445397	-0.327667	-3.56684	-3.56684	0.176295	-3.56684	0.580297	0.694345	-0.839805	NA
RUNX1T1	-1.67768	1.76269	0.714195	-0.451696	0.992287	-0.314112	-2.8519	0.255683	-0.0103396	-1.23453	-0.305394	-0.101047	0.277998	0.269036	-0.618657	1.16267	-0.274576	-0.485617	-1.09891	-0.518313	-0.64646	-0.0817047	-0.236105	0.386814	-0.373713	0.673687	-0.762353	-1.14755	-1.85409	0.652392	-0.265495	-0.458158	0.224355	0.818789	0.456025	0.466086	0.417391	-5	-1.0244	0.256033	-0.850348	-0.193283	-1.64222	1.56549	-0.523958	-1.63914	-0.659302	-0.186918	NA
GPM6B	-0.698719	0.740113	-0.15941	1.05777	0.309324	1.40234	-3.42501	-0.142089	-0.177688	-1.33843	-0.969497	-0.54617	0.370683	-1.28753	0.155537	-0.431178	-0.351149	-0.242982	-1.15479	-0.44453	-1.03408	-0.00523721	-0.453021	-0.107095	-2.94496	-0.0778069	-0.640999	-0.693031	-4.33595	-0.163819	-0.566981	-0.140192	0.043435	-0.935565	0.317225	-1.13584	-0.176106	-3.48715	-1.43553	-1.41957	0.425161	0.357411	-1.52346	0.498696	-2.16898	0.508299	-2.46644	0.244538	NA
UBE2W	-1.3552	0.912369	-0.292371	-0.751931	0.463154	-0.771573	-3.35009	-0.179625	-0.053457	-1.71607	-0.163985	0.117609	0.413413	0.566939	-0.250952	0.365814	0.462574	-0.354364	-0.537193	-2.52517	0.389517	0.246849	-0.439547	0.521138	-0.889598	-1.08028	-1.4666	-0.986579	-3.41699	-0.465275	0.404015	0.106571	0.00434317	-0.21172	-0.0380585	0.208176	-0.434464	-0.603614	-0.749371	0.239865	0.0529918	-0.849277	-0.271772	1.51177	0.110154	0.768843	-1.48849	0.538265	NA
PLEKHA5	1.72226	0.948166	0.430395	-1.08878	0.16716	-0.239389	-0.792461	-0.618335	0.102753	0.471409	0.188599	-0.212895	0.546596	0.715565	0.482232	0.243804	-0.0465364	0.724154	-0.302638	0.596898	0.0795466	0.19511	0.208028	-0.823358	-4.63143	1.13715	-1.9481	0.0073692	-0.24217	0.356312	-0.00765505	0.579523	0.590939	0.127079	0.0999858	-0.0821548	-0.413888	0.141551	-0.613199	0.425232	-1.01206	-4.63143	-2.97465	-0.0536621	-3.02479	0.307039	0.457226	0.415877	NA
TMEM255B	0.205211	-0.655865	0.933076	1.10745	1.17795	0.64524	1.01385	0.968433	1.16189	1.25586	1.44233	1.25061	0.920678	0.584845	0.973392	1.3711	0.0895484	0.0846626	1.02835	1.4559	0.212874	1.16703	0.695214	0.969505	1.66375	-2.57919	0.186351	-0.275736	0.123316	-0.199065	0.578574	0.1395	0.725524	0.655149	0.128098	-0.535207	0.472033	0.3838	0.535013	-0.438716	-1.24019	0.625976	-1.50999	-0.691357	-0.383153	-2.57919	0.274939	0.191203	NA
NEK1	1.33572	1.82349	-0.500786	0.155643	0.487312	0.0164981	-1.71671	-0.817108	0.0581994	-0.296546	0.385211	0.502268	-0.223027	-0.187876	-0.53719	-0.228708	0.642815	-0.382547	-0.344138	-0.586828	0.213839	0.369541	0.344465	0.344905	-0.45149	-1.07035	-0.674206	-0.314596	-3.42874	0.0473631	0.573373	0.310026	1.23364	1.23995	0.0840713	-0.490566	-0.144801	0.427666	-0.275208	0.777059	-3.43205	0.648108	-3.44022	-1.4557	-0.196093	-3.67866	-1.79499	-0.0735836	NA
CAPZA1	-0.099905	1.03374	-0.367255	-0.111992	0.95113	0.999189	-0.722186	0.341486	-0.106472	-0.114221	0.44705	0.799552	0.203746	0.355925	0.254249	0.835967	0.705104	-1.34985	0.747686	-0.222461	0.899379	1.38022	0.894179	1.11969	-0.313358	-0.412429	-0.387679	-1.36557	-4.81092	0.0216779	-0.585463	0.695305	0.0325802	-2.54164	-1.27992	-2.15204	-1.59047	-0.696518	-1.48348	-0.230114	0.713576	-0.455457	-0.370254	0.347036	-1.02601	0.480968	-1.28989	-0.654168	NA
ADAM28	-0.971225	0.946714	-0.0845543	0.425698	1.21776	0.0223366	-0.971225	-0.971225	-0.971225	-0.971225	-0.971225	-0.971225	0.68074	1.07043	-0.971225	-0.971225	1.38359	0.906804	-0.971225	-0.971225	1.08202	-0.332068	1.3033	-0.971225	-0.971225	-0.971225	-0.971225	-0.971225	-0.971225	0.353516	0.231461	0.272871	-0.971225	-0.971225	0.460351	0.385575	-0.971225	-0.971225	-0.971225	0.16802	-0.971225	1.23828	-0.971225	-0.287456	1.64798	1.33457	-0.971225	1.03005	NA
INA	-0.476884	0.105639	-2.20751	0.292922	-0.277016	0.100836	-2.88887	-1.35752	-0.850914	-0.791011	-0.781531	-0.786261	-1.20228	-0.607433	-2.48098	-0.720535	-0.686249	-0.446459	-1.78911	-2.05797	-0.386558	0.0909847	0.0994398	0.930637	-1.11898	0.32267	1.23059	-0.891446	-0.827617	0.283143	-1.26087	0.752731	-0.617536	-0.0279267	-0.018924	0.237344	-0.795056	-1.3326	-0.229848	1.47813	-0.651101	-0.80055	-4.28375	-0.518979	-0.569506	-2.88453	-0.801438	0.821238	NA
BRDT	-0.360555	-1.54748	-2.85967	0.232578	0.685412	0.908204	-1.00947	0.771482	0.194543	0.0969681	-0.00910345	-0.496626	0.873431	-1.4461	0.346455	-1.4649	-0.618905	-0.89089	0.625888	-0.132706	0.110373	0.213103	0.104176	-1.96383	0.281819	0.247628	-1.44133	0.0570837	-2.68897	-2.12969	-0.690612	0.0315176	0.388696	-0.480598	0.48161	-2.57985	-1.05036	-0.305285	-0.155555	0.0281172	0.113314	0.055027	-0.329359	-0.582737	-1.18172	-0.572656	0.208404	0.166161	NA
SGO1	2.20184	-0.0804135	1.1578	-1.24933	-0.587264	0.763514	0.569165	0.832715	0.677974	1.18134	1.30232	-0.808363	0.167887	0.569717	-0.581139	-1.08611	-1.22812	-0.942325	0.186132	1.19361	0.395706	0.0718862	-0.0118036	0.11432	-0.102262	-0.0428951	0.326703	-0.116745	-3.43021	-1.16146	0.772979	0.180068	1.28605	-0.715114	-0.00200809	-0.185133	-0.345587	-0.834259	-1.63239	0.366426	1.28545	1.73246	-2.45838	-0.46874	-2.44013	-1.00414	-0.588233	-1.34094	NA
ANLN	-1.19981	0.542189	-1.35345	-0.822692	0.575875	0.700018	-1.37572	-0.79149	0.409572	-0.410568	-0.908106	0.0613382	-1.46067	-0.188071	-0.0565339	-0.203591	0.3165	-0.48381	-0.0957467	0.126248	0.145896	-0.154368	0.203863	0.747703	-5	-1.08591	0.0525094	-0.591795	-1.96668	0.373735	0.342215	0.689481	1.03185	0.18951	0.234219	-0.0239842	0.677282	-5	-0.668655	-0.685497	0.40353	0.252394	-1.8058	0.412279	-0.248943	-1.13353	-3.41933	-0.906795	NA
RSPO2	-1.75941	-0.319363	-1.1461	0.406524	-0.600654	0.709932	-2.08041	-0.775862	-0.567902	-1.39465	-0.442618	-0.0130527	0.566802	-0.0544402	0.162352	0.0780627	0.592319	0.118916	-0.887436	-2.61644	-0.457561	0.101937	-0.305282	-0.631635	-1.22832	-0.0381843	-0.766982	-1.21276	-1.88284	0.342518	-0.257129	0.271406	0.240253	-2.46049	0.327744	-0.208933	0.159838	-2.25819	-0.243613	-0.105287	-0.524251	-0.308824	-1.16213	0.0957781	-0.500061	-0.313289	-5	0.394108	NA
PPP4R2	1.57498	1.06262	0.213746	-0.258422	-1.52809	-0.195961	-0.312145	0.0765231	0.5332	-0.201377	-2.17321	-0.124837	0.560474	1.14542	-0.112904	-0.276212	0.513506	0.410073	0.550771	-0.6665	-0.373512	1.33427	1.03335	-0.918387	0.349462	-0.895075	-1.6003	0.685038	-0.477644	-0.72085	0.695925	-0.33382	-0.342391	0.855645	0.0939129	-1.09146	0.291779	1.85394	-0.0776826	-0.619201	0.0181613	0.672641	-0.986995	-2.04055	-0.321908	0.428163	-0.524322	0.372803	NA
ELAVL2	-3.08006	1.22413	-0.591281	-0.324719	-0.000885885	-0.183183	-3.72586	-2.66127	0.154661	-0.791522	-1.17392	-0.118709	-0.286523	-0.382083	-0.594337	-0.220929	-0.539657	-0.303833	-0.453113	-3.39951	0.254102	0.067991	-1.03376	0.0305504	0.288584	-1.9527	-2.01571	-1.44807	-1.31143	-0.114748	-0.0982978	0.14404	-0.100047	-1.34184	-0.0412287	-0.636827	0.636516	-1.86548	-0.239047	0.35401	0.0107637	-0.373696	-0.703541	-0.523785	-0.699869	0.103932	-0.890744	0.251646	NA
IER3IP1	-1.05021	1.47235	0.431681	-2.68878	1.29757	-0.264479	-0.0348664	0.440783	-0.513205	-0.317687	0.280759	-0.0172002	0.41691	-0.0755073	0.0830358	1.02911	0.349502	0.0833153	-0.101405	-3.59764	0.318501	0.274109	0.0789231	-0.00908064	-0.546728	-0.990006	-1.32537	0.0996985	-2.73722	-0.163224	0.780995	0.0953445	0.166145	-3.9409	0.0338614	-0.285635	-0.867576	-0.471568	-0.467536	-0.414305	-0.348692	1.21604	-1.40519	0.805401	-1.34731	-0.849292	-0.436861	-0.469548	NA
OVCH1	-1.49538	0.535509	-1.49538	0.683325	0.571407	0.533682	-1.49538	-1.49538	0.634581	-1.49538	-1.49538	-1.49538	1.04349	-0.0980609	0.0450215	-0.770836	-0.0306157	-0.2252	-1.49538	-1.49538	-1.49538	0.261388	0.300002	-1.49538	-1.49538	-1.49538	0.560056	-0.491374	-1.49538	0.626278	0.940769	0.223581	1.37313	-1.49538	1.06143	1.01266	0.726418	-1.49538	1.18912	-1.49538	0.219687	-1.49538	-1.49538	-0.53277	-0.0210196	-0.123262	-0.0803177	0.837229	NA
TMEM70	0.0849047	-0.286514	1.29978	0.056132	0.843884	-1.76586	-0.825712	-0.301463	-0.40233	1.46216	-0.467436	-0.0633352	0.0132519	-0.807651	1.2363	-0.0463635	-0.118043	0.870324	0.239346	0.469438	0.305112	0.475825	0.183827	0.351104	0.0467364	0.05102	-0.429725	0.74285	-0.91746	0.248322	-1.1278	-0.109779	-0.034381	-0.26977	-0.192041	0.103291	0.213669	-0.452434	-0.23939	0.337971	0.517782	-0.654588	-1.40253	0.624032	-0.038065	0.367209	0.455264	0.027339	NA
PTF1A	1.07951	0.657895	-0.94826	0.410672	-0.44472	0.332184	-0.163845	0.57222	-0.251589	0.822937	-2.50005	0.705585	-0.977037	0.183021	0.653109	-0.528897	0.278162	0.167613	-0.969343	0.769203	0.231544	0.331268	0.247857	0.321308	0.432916	0.531186	0.0660791	0.728121	-0.126994	-1.0498	0.342516	0.634485	0.269806	-2.50005	0.569863	0.686375	0.847437	-2.50005	0.558373	0.115385	-2.50005	-2.50005	-2.50005	-1.79369	0.495695	0.203425	-0.53929	-0.161458	NA
FAM149A	-0.269036	-0.172835	0.561152	-0.147588	-2.72249	-0.290112	-2.72249	0.290319	-0.314106	-0.0870274	0.253114	0.368199	0.106287	-0.142591	0.507347	0.564096	-0.193508	-1.683	-0.406074	0.314789	0.372577	0.251645	-0.0694661	0.97694	0.544695	1.55843	-2.72249	0.140132	-0.104086	0.402611	0.543369	0.636975	0.831818	0.462404	0.70157	0.8151	0.524604	0.666167	0.264625	0.565459	-2.72249	-2.72249	-2.72249	-0.137283	0.4297	0.276355	-1.38263	0.478357	NA
ITGA6	0.855723	0.443305	-0.499227	-1.68253	-0.109676	-0.596128	-0.726945	-0.0677422	0.226427	-1.50598	-0.684503	-0.191687	0.320628	-0.404942	-0.528538	0.0794971	-0.259106	-1.22945	0.702503	-0.481528	-0.597419	0.257459	-0.549991	-0.42234	-0.154209	-1.28483	0.000625489	-0.29922	-0.605944	-1.44346	1.12545	0.330453	1.53788	-0.00477693	1.31589	0.971697	1.85793	0.321382	0.908768	0.511287	-0.160228	-0.129043	-0.707244	-0.936913	-4.05864	1.05155	-0.582328	0.455122	NA
INSIG1	-1.41994	0.0172701	-1.71057	0.0382568	-0.563425	0.628659	-3.92425	-0.114491	0.0540553	-0.536205	-0.825341	-0.211571	-0.0184078	-0.0104406	-1.20242	-0.20888	0.266977	0.297899	-0.41148	-1.19068	0.0128632	-1.07272	-0.25363	0.504445	-0.418141	-0.167058	-0.669531	-0.715517	-1.52265	0.127867	0.332713	0.360259	1.1775	-0.102729	1.02938	0.0620281	0.396747	-5	-0.234036	-0.881264	0.373348	0.526753	-0.596099	0.228826	-1.62891	-0.136944	-5	0.221071	NA
ZC2HC1A	0.882516	1.15801	0.394378	-0.173284	-0.08802	-0.127437	0.200169	-1.57786	0.103975	0.0895705	0.566815	-0.0597118	-0.184691	-0.0643743	-2.85581	-0.159722	-0.189567	0.454082	0.165206	0.859892	-1.34593	-0.969864	-1.11874	0.476923	0.344099	-0.218333	-3.77444	0.213393	-0.414172	0.352091	-0.0321514	0.320296	0.747319	-0.686294	0.368108	0.149824	0.561533	-3.77444	0.326367	-0.174192	-0.432448	0.765261	-0.356336	-1.02563	-3.77444	0.323054	0.563532	-3.77444	NA
RUFY3	0.798154	1.06544	1.12609	1.17423	1.19671	0.327575	0.105458	0.549713	0.295582	0.514302	0.0711014	-0.523885	-0.123241	0.285286	0.177376	-0.181857	0.363665	0.515681	0.0211612	-0.0161324	0.405729	-0.238102	-0.340567	0.904495	-0.511642	-0.218793	0.770918	-0.21781	-1.14105	-0.166589	-0.220937	-0.53226	0.557665	-0.143452	0.722364	0.0226792	0.413168	0.0377814	0.460813	0.832869	0.178034	0.730481	-1.00691	0.43729	0.811117	0.442105	1.29584	0.643397	NA
SYPL1	-1.12902	0.159763	-1.14787	0.782118	0.985554	0.663196	-1.06823	0.300822	0.520266	-1.78936	-0.683302	-0.120775	0.372648	-0.223542	0.625464	0.268803	0.517034	-0.365534	0.628173	-1.73485	-0.528823	1.20724	-0.0653752	0.172306	-0.555723	0.0673579	-0.609858	-2.02974	-1.89327	0.493148	0.725776	0.177125	0.84904	0.233859	0.790861	-0.0955531	0.722714	-0.753149	0.212512	-1.07889	-0.984169	-0.628423	-0.1905	0.427493	-0.669517	0.272933	-5	-0.740288	NA
PLCG2	-2.78645	0.727336	0.592074	-1.39385	-0.898647	0.725108	-1.02149	-1.00603	0.158311	-0.478012	0.324535	-0.573109	0.542957	0.668294	0.375605	-0.471409	0.554944	0.699428	0.390282	0.0737859	0.19969	0.141397	-0.128301	0.420304	-1.4573	0.550384	0.402225	0.142946	-0.868962	0.918816	0.532171	0.318302	0.309185	0.395988	0.320575	0.479163	-0.110446	-2.78645	0.531174	-0.0559188	0.110004	0.0382989	-0.551424	-2.78645	-1.66397	0.581889	-0.123388	-0.262979	NA
SALL4	-0.332528	0.46034	-0.195317	-0.424396	0.0761185	-0.376095	-0.389729	-2.22032	-0.140476	0.56065	-2.95932	0.0791424	0.0641573	-0.611653	-0.193278	-0.103923	0.631371	0.0997286	-0.0194504	-1.04369	0.480558	-0.702301	0.722686	-0.986479	0.438893	0.323825	0.327687	-0.128244	-1.66666	0.699908	0.843267	0.423087	0.549116	0.941008	0.17736	-0.15269	0.474694	-2.95932	0.199892	0.350076	-2.08069	-1.80974	0.622112	0.596143	0.594522	-2.95932	0.275677	0.482851	NA
ARFGEF1	-0.186011	0.331011	0.545603	-0.134873	0.449131	0.246819	-2.44387	0.279218	0.144474	-0.49487	-1.15478	0.487053	0.300365	-0.193331	-0.057237	-0.607094	0.0327331	0.191517	0.0839339	-0.331344	0.710689	0.68927	0.188062	0.373357	0.0630532	-1.22209	-1.83049	-0.311767	0.199985	0.170883	0.12017	0.614016	0.959121	-0.409926	0.127155	-0.164943	0.560872	-5	0.108442	1.34253	-0.456965	-3.27309	-3.20937	-0.237222	0.460817	-0.0277229	-0.268487	0.184354	NA
IGFBPL1	-1.75244	-1.75244	-1.75244	0.571211	-0.380533	-0.209176	-0.769727	-1.75244	0.495674	0.549304	0.774298	0.620783	-1.00109	-1.75244	-0.362496	-1.75244	0.499966	0.832075	-0.228367	-0.927376	0.621956	-1.20961	0.330825	-0.659214	-1.75244	-1.75244	-1.75244	0.817229	-0.173718	0.345181	0.361804	0.331737	0.241441	0.01478	0.257704	0.424196	0.622412	-1.75244	0.189931	0.726715	-1.129	-1.75244	-1.75244	-1.75244	-1.75244	-1.75244	0.55857	0.170173	NA
AC025887.2	1.64198	1.40354	-0.987114	1.19324	-0.987114	-0.987114	1.12459	-0.987114	1.24967	-0.987114	-0.987114	0.483702	-0.987114	0.945444	-0.05077	0.752144	1.05819	1.50462	0.0919314	-0.987114	-0.380862	-0.987114	-0.987114	-0.987114	-0.987114	-0.987114	-0.987114	0.0946454	-0.178616	0.690028	-0.987114	-0.987114	-0.987114	-0.987114	-0.451968	1.38351	-0.339702	-0.987114	0.215443	1.15859	1.74931	-0.987114	-0.987114	-0.266156	-0.987114	-0.987114	-0.987114	-0.987114	NA
[truncated: 86 more columns]
