# Supplementary material for: Single-oocyte transcriptional profile of early-stage human oocytes reveals differentially expressed genes in the primordial and transitioning stages
Source: Research Square preprint supplement (doi:10.21203/rs.3.rs-6957514/v1), 2025-07-03
Supplement: Supplementary file 4 [file a46263f255c4551c13f71f9d.xlsx]

## Sheet: oocyte133_meta
	Sample_ID	batch	Donor	Age	Race	plate	Description	column	row	nCount_RNA	nFeature_RNA	percent.mt	seurat_clusters	umap1	umap2
Sample_3799-JM-35	Sample_3799-JM-35	1	4	20	White	3	C5	C	5	1064971	12873	0.022456	2	1.77437	2.67411
Sample_3799-JM-37	Sample_3799-JM-37	1	4	20	White	3	E5	E	5	957251	12262	0.0266691	2	1.16827	2.72725
Sample_3799-JM-45	Sample_3799-JM-45	1	4	20	White	3	E6	E	6	1005656	12974	0.0163306	2	0.317881	2.52966
Sample_3799-JM-50	Sample_3799-JM-50	1	5	30	White	3	B7	B	7	1452362	11410	0.0446734	1	-2.50456	-0.66262
Sample_3799-JM-54	Sample_3799-JM-54	1	5	30	White	3	F7	F	7	2276855	11605	0.00944592	2	1.42831	2.52609
Sample_3799-JM-59	Sample_3799-JM-59	1	5	30	White	3	C8	C	8	3100284	14628	0.00225818	2	3.6096	0.316012
Sample_3799-JM-60	Sample_3799-JM-60	1	5	30	White	3	D8	D	8	1462840	12878	0.00486109	2	2.0002	2.24163
Sample_3799-JM-61	Sample_3799-JM-61	1	5	30	White	3	E8	E	8	748608	11581	0.00743647	2	1.71179	2.08572
Sample_3799-JM-62	Sample_3799-JM-62	1	5	30	White	3	F8	F	8	3008451	15376	0.00131397	2	3.66525	-0.386644
Sample_3799-JM-63	Sample_3799-JM-63	1	5	30	White	3	G8	G	8	1546189	11939	0.0333381	1	-3.53536	-1.5066
Sample_3799-JM-67	Sample_3799-JM-67	1	5	30	White	3	C9	C	9	1394367	12435	0.00345031	2	0.458062	2.22078
Sample_3799-JM-68	Sample_3799-JM-68	1	5	30	White	3	D9	D	9	2178145	14753	0.00351584	2	3.31632	-0.715637
Sample_3799-JM-69	Sample_3799-JM-69	1	5	30	White	3	E9	E	9	1344278	11480	0.0111495	2	1.20174	2.23906
Sample_3799-JM-71	Sample_3799-JM-71	1	5	30	White	3	G9	G	9	1805247	11786	0.00300679	2	1.04321	2.41523
Sample_4311-JM-120	Sample_4311-JM-25	2	2	18	White	1	A4	A	4	2613808	12885	0.012437	1	-2.47228	-1.11563
Sample_4311-JM-122	Sample_4311-JM-27	2	2	18	White	1	C4	C	4	1453177	11290	0.00419082	2	-0.393512	1.44907
Sample_4311-JM-124	Sample_4311-JM-29	2	2	18	White	1	E4	E	4	2928141	14496	0.00958424	2	-1.12295	1.85786
Sample_4311-JM-125	Sample_4311-JM-30	2	2	18	White	1	F4	F	4	1179513	10760	0.0145543	2	1.64273	1.82891
Sample_4311-JM-126	Sample_4311-JM-31	2	2	18	White	1	G4	G	4	2742617	12787	0.0394244	1	-3.36276	-1.13664
Sample_4311-JM-127	Sample_4311-JM-32	2	2	18	White	1	H4	H	4	2410604	13344	0.00784741	1	-3.40256	-1.63976
Sample_4311-JM-130	Sample_4311-JM-36	2	2	18	White	1	D5	D	5	1983160	11013	0.00802658	2	1.3569	1.52121
Sample_4311-JM-133	Sample_4311-JM-39	2	2	18	White	1	G5	G	5	3102909	12738	0.00926614	1	-3.29147	-1.83318
Sample_4311-JM-136	Sample_4311-JM-42	2	2	18	White	1	B6	B	6	1470728	11930	0.175897	1	-2.51945	-0.283488
Sample_4311-JM-14	Sample_4311-JM-46	2	2	18	White	1	F6	F	6	1383915	9582	0.0067244	2	1.35352	0.312895
Sample_4311-JM-140	Sample_4311-JM-47	2	2	18	White	1	G6	G	6	2509764	11147	0.0112026	1	-1.87461	-0.0924496
Sample_4311-JM-141	Sample_4311-JM-48	2	2	18	White	1	H6	H	6	2839998	13409	0.00742254	2	0.617959	0.757115
Sample_4311-JM-143	Sample_4311-JM-50	2	6	23	White	1	B7	B	7	2251202	15289	0.0569092	1	-3.69022	-0.00934453
Sample_4311-JM-145	Sample_4311-JM-52	2	6	23	White	1	D7	D	7	2010521	11765	0.0123734	1	-1.30834	-0.635076
Sample_4311-JM-146	Sample_4311-JM-53	2	6	23	White	1	E7	E	7	2325845	12079	0.00769613	1	-1.18556	-0.406944
Sample_4311-JM-147	Sample_4311-JM-54	2	6	23	White	1	F7	F	7	4129711	14642	0.0137211	1	-2.60115	-1.44524
Sample_4311-JM-148	Sample_4311-JM-55	2	6	23	White	1	G7	G	7	3938202	13980	0.00502031	1	-2.43829	-2.23252
Sample_4311-JM-149	Sample_4311-JM-56	2	6	23	White	1	H7	H	7	3013930	13874	0.0174546	1	-2.67599	-1.81425
Sample_4311-JM-15	Sample_4311-JM-57	2	6	23	White	1	A8	A	8	3925814	15552	0.000481174	2	3.12519	-1.1661
Sample_4311-JM-154	Sample_4311-JM-62	2	6	23	White	1	F8	F	8	2605782	12950	0.00887258	1	-1.76318	-1.23354
Sample_4311-JM-155	Sample_4311-JM-63	2	6	23	White	1	G8	G	8	3673557	14202	0.00518108	1	-2.38082	-1.92294
Sample_4311-JM-156	Sample_4311-JM-64	2	6	23	White	1	H8	H	8	2640670	14098	0.0704965	1	-2.83163	-1.75929
Sample_4311-JM-158	Sample_4311-JM-66	2	6	23	White	1	B9	B	9	3299453	11657	0.00125597	2	0.211878	1.47126
Sample_4311-JM-159	Sample_4311-JM-67	2	6	23	White	1	C9	C	9	3700823	13679	0.000795229	2	1.62919	0.761449
Sample_4311-JM-16	Sample_4311-JM-68	2	6	23	White	1	D9	D	9	2218535	14314	0.0465176	1	-3.60845	-0.478781
Sample_4311-JM-160	Sample_4311-JM-69	2	6	23	White	1	E9	E	9	1941233	15202	0.108938	1	-3.35349	-0.11153
Sample_4311-JM-161	Sample_4311-JM-70	2	6	23	White	1	F9	F	9	2169256	12664	0.00957517	1	-1.70489	-0.501469
Sample_4311-JM-162	Sample_4311-JM-71	2	6	23	White	1	G9	G	9	2816767	13737	0.00789771	1	-2.02856	-1.58655
Sample_4311-JM-163	Sample_4311-JM-72	2	6	23	White	1	H9	H	9	2369724	13094	0.00299444	1	-1.53557	-1.03469
Sample_4311-JM-164	Sample_4311-JM-73	2	7	18	Black	1	A10	A	10	2603540	13792	0.0058962	1	-2.26205	-1.97985
Sample_4311-JM-165	Sample_4311-JM-74	2	7	18	Black	1	B10	B	10	1699525	11404	0.00566041	1	-1.02167	0.217255
Sample_4311-JM-166	Sample_4311-JM-75	2	7	18	Black	1	C10	C	10	3022721	10536	0.00190127	2	-0.221149	1.24717
Sample_4311-JM-168	Sample_4311-JM-77	2	7	18	Black	1	E10	E	10	1531324	10252	0.0143882	1	-1.45625	-0.324732
Sample_4311-JM-169	Sample_4311-JM-78	2	7	18	Black	1	F10	F	10	4329038	12605	0.00779457	2	-0.228308	-0.0977196
Sample_4311-JM-17	Sample_4311-JM-79	2	7	18	Black	1	G10	G	10	2602183	11696	0.00666133	2	1.55226	-0.582946
Sample_4311-JM-171	Sample_4311-JM-81	2	7	18	Black	1	A11	A	11	2921470	12940	0.00855836	2	-0.384842	-0.426123
Sample_4311-JM-173	Sample_4311-JM-83	2	7	18	Black	1	C11	C	11	4530364	14529	0.0013191	2	1.41967	-0.991079
Sample_4311-JM-174	Sample_4311-JM-84	2	7	18	Black	1	D11	D	11	2935557	12242	0.00112244	2	0.840572	-0.440135
Sample_4311-JM-177	Sample_4311-JM-87	2	7	18	Black	1	G11	G	11	2089326	10912	0.0151326	1	-0.0626616	-0.689518
Sample_4311-JM-178	Sample_4311-JM-88	2	7	18	Black	1	H11	H	11	3872621	14942	0.00205003	2	2.08431	-1.50153
Sample_4311-JM-179	Sample_4311-JM-89	2	7	18	Black	1	A12	A	12	1230994	11027	0.0285135	1	-3.16713	-0.953954
Sample_4311-JM-18	Sample_4311-JM-90	2	7	18	Black	1	B12	B	12	3943404	13194	0.00216945	2	0.0713421	0.247404
Sample_4311-JM-180	Sample_4311-JM-91	2	7	18	Black	1	C12	C	12	3015849	13668	0.00302104	2	2.45465	-1.22942
Sample_4311-JM-181	Sample_4311-JM-92	2	7	18	Black	1	D12	D	12	3873738	14366	0.0013527	2	2.01982	-1.15588
Sample_4311-JM-182	Sample_4311-JM-93	2	7	18	Black	1	E12	E	12	2389838	11471	0.00602635	2	0.4986	-0.427031
Sample_4311-JM-183	Sample_4311-JM-94	2	7	18	Black	1	F12	F	12	3048237	12744	0.00811715	2	0.786128	-0.640715
Sample_4311-JM-184	Sample_4311-JM-95	2	7	18	Black	1	G12	G	12	2896012	16309	0.0925093	1	-3.5557	-0.0341663
Sample_4311-JM-185	Sample_4311-JM-96	2	7	18	Black	1	H12	H	12	4442092	15052	0.00187614	2	2.73524	-1.83884
Sample_4311-JM-186	Sample_4311-JM-97	2	8	26	White	2	A1	A	1	3971777	13812	0.00422456	2	2.38384	-1.35291
Sample_4311-JM-187	Sample_4311-JM-98	2	8	26	White	2	B1	B	1	5124606	15425	0.00289134	2	2.39649	-1.91704
Sample_4311-JM-188	Sample_4311-JM-99	2	8	26	White	2	C1	C	1	4435129	15018	0.000757588	2	2.21132	-1.07751
Sample_4311-JM-189	Sample_4311-JM-100	2	8	26	White	2	D1	D	1	4240692	13660	0.00101493	2	1.70656	-0.711324
Sample_4311-JM-19	Sample_4311-JM-101	2	8	26	White	2	E1	E	1	2450009	11825	0.00581998	2	1.81094	0.0192481
Sample_4311-JM-190	Sample_4311-JM-102	2	8	26	White	2	F1	F	1	1354292	8480	0.0116083	2	0.383328	-0.559431
Sample_4311-JM-191	Sample_4311-JM-103	2	8	26	White	2	G1	G	1	5127935	14361	0.0061163	2	1.38662	-2.3238
Sample_4311-JM-192	Sample_4311-JM-104	2	8	26	White	2	H1	H	1	1723661	14908	0.128826	1	-3.12989	-0.267055
Sample_4311-JM-2	Sample_4311-JM-105	2	8	26	White	2	A2	A	2	3192383	12646	0.00267543	2	2.08059	-0.293426
Sample_4311-JM-20	Sample_4311-JM-106	2	8	26	White	2	B2	B	2	3780828	14887	0.00304748	2	2.25823	-2.13243
Sample_4311-JM-21	Sample_4311-JM-107	2	8	26	White	2	C2	C	2	3461530	13719	0.000725691	2	2.17166	-0.82202
Sample_4311-JM-22	Sample_4311-JM-108	2	8	26	White	2	D2	D	2	3654398	14421	0.00196503	2	2.17255	-0.306589
Sample_4311-JM-23	Sample_4311-JM-109	2	8	26	White	2	E2	E	2	3064599	12599	0.000639235	2	1.72296	-0.150018
Sample_4311-JM-24	Sample_4311-JM-110	2	8	26	White	2	F2	F	2	3157006	14994	0.0250858	1	-3.69142	-0.708394
Sample_4311-JM-25	Sample_4311-JM-111	2	8	26	White	2	G2	G	2	3352675	15364	0.163442	1	-2.97577	0.158235
Sample_4311-JM-27	Sample_4311-JM-113	2	8	26	White	2	A3	A	3	3702885	15913	0.0640041	1	-2.2183	1.02637
Sample_4311-JM-28	Sample_4311-JM-114	2	8	26	White	2	B3	B	3	3068103	15295	0.101369	1	-2.15875	1.4929
Sample_4311-JM-3	Sample_4311-JM-116	2	8	26	White	2	D3	D	3	4906540	14403	0.0041192	2	3.16033	-1.21862
Sample_4311-JM-31	Sample_4311-JM-118	2	8	26	White	2	F3	F	3	2806338	12383	0.00664638	1	-1.55116	1.37691
Sample_4311-JM-34	Sample_4311-JM-121	2	9	29	White	2	A4	A	4	3420004	14908	0.137901	1	-2.37824	1.35401
Sample_4311-JM-35	Sample_4311-JM-122	2	9	29	White	2	B4	B	4	1976730	14729	0.0804349	1	-3.10688	0.371267
Sample_4311-JM-37	Sample_4311-JM-124	2	9	29	White	2	D4	D	4	2532660	14540	0.0923685	1	-2.7015	1.14461
Sample_4311-JM-38	Sample_4311-JM-125	2	9	29	White	2	E4	E	4	3069771	12732	0.00213501	2	-0.82132	1.92837
Sample_4311-JM-39	Sample_4311-JM-126	2	9	29	White	2	F4	F	4	539954	8470	0.0331195	1	-2.49914	-0.812104
Sample_4311-JM-4	Sample_4311-JM-127	2	9	29	White	2	G4	G	4	4786666	12878	0.00468531	2	2.02653	-1.9994
Sample_4311-JM-40	Sample_4311-JM-128	2	9	29	White	2	H4	H	4	3403346	14167	0.00256835	2	-1.31541	1.94681
Sample_4311-JM-43	Sample_4311-JM-131	2	9	29	White	2	C5	C	5	2516976	12803	0.00673745	2	-0.377808	2.10059
Sample_4311-JM-44	Sample_4311-JM-132	2	9	29	White	2	D5	D	5	3191429	14615	0.180098	2	-1.9283	1.68036
Sample_4311-JM-45	Sample_4311-JM-133	2	9	29	White	2	E5	E	5	1950685	12414	0.00421852	2	-1.13342	1.41963
Sample_4311-JM-46	Sample_4311-JM-134	2	9	29	White	2	F5	F	5	2281991	15947	0.120206	1	-3.46982	0.169764
Sample_4311-JM-47	Sample_4311-JM-135	2	9	29	White	2	G5	G	5	2052763	10984	0.00476772	2	-0.916459	1.60462
Sample_4311-JM-5	Sample_4311-JM-138	2	9	29	White	2	B6	B	6	3433891	11459	0.00390548	2	1.28228	-1.53658
Sample_4311-JM-50	Sample_4311-JM-139	2	9	29	White	2	C6	C	6	1516495	9413	0.0151949	2	0.731419	1.89518
Sample_4311-JM-51	Sample_4311-JM-140	2	9	29	White	2	D6	D	6	3050630	13523	0.0113567	1	0.814706	-2.10955
Sample_4311-JM-53	Sample_4311-JM-142	2	9	29	White	2	F6	F	6	1648368	10105	0.00607025	2	0.904533	2.00402
Sample_4311-JM-54	Sample_4311-JM-143	2	9	29	White	2	G6	G	6	3255723	13006	0.00649226	2	3.09251	0.708621
Sample_4311-JM-55	Sample_4311-JM-144	2	9	29	White	2	H6	H	6	2291809	11688	0.00916438	2	1.11497	1.93644
Sample_4311-JM-56	Sample_4311-JM-145	2	1	16	White	2	A7	A	7	1865178	12276	0.0609411	1	-4.09076	-1.27171
Sample_4311-JM-58	Sample_4311-JM-147	2	1	16	White	2	C7	C	7	1898847	12325	0.00404087	2	-0.480739	1.58861
Sample_4311-JM-6	Sample_4311-JM-149	2	1	16	White	2	E7	E	7	4304766	14664	0.00736138	2	2.71622	-1.66833
Sample_4311-JM-60	Sample_4311-JM-150	2	1	16	White	2	F7	F	7	1855340	12407	0.00523785	2	2.72135	1.49359
Sample_4311-JM-61	Sample_4311-JM-151	2	1	16	White	2	G7	G	7	1234529	11619	0.00515905	2	1.94782	1.54058
Sample_4311-JM-63	Sample_4311-JM-153	2	1	16	White	2	A8	A	8	1110819	10062	0.0747593	1	-4.46281	-1.18803
Sample_4311-JM-64	Sample_4311-JM-154	2	1	16	White	2	B8	B	8	1041196	11234	0.14201	1	-3.90172	-0.981638
Sample_4311-JM-68	Sample_4311-JM-158	2	1	16	White	2	F8	F	8	2322991	13779	0.0048175	2	2.58343	1.04675
Sample_4311-JM-69	Sample_4311-JM-159	2	1	16	White	2	G8	G	8	1882835	13516	0.00791997	2	3.2604	-0.458744
Sample_4311-JM-7	Sample_4311-JM-160	2	1	16	White	2	H8	H	8	4611406	14161	0.00154226	2	2.70756	-0.806227
Sample_4311-JM-70	Sample_4311-JM-161	2	1	16	White	2	A9	A	9	2113045	11470	0.0160318	1	-4.15886	-1.49899
Sample_4311-JM-71	Sample_4311-JM-162	2	1	16	White	2	B9	B	9	1110740	11159	0.0635702	1	-4.38988	-1.27891
Sample_4311-JM-73	Sample_4311-JM-164	2	1	16	White	2	D9	D	9	1357571	11894	0.0266152	1	-3.23541	-1.24224
Sample_4311-JM-74	Sample_4311-JM-165	2	1	16	White	2	E9	E	9	1633154	12845	0.00964085	2	0.671183	-1.68842
Sample_4311-JM-75	Sample_4311-JM-166	2	1	16	White	2	F9	F	9	2128952	14556	0.00397144	2	2.74643	-0.123053
Sample_4311-JM-76	Sample_4311-JM-167	2	1	16	White	2	G9	G	9	2210976	12584	0.00465722	2	2.47811	1.53191
Sample_4311-JM-77	Sample_4311-JM-168	2	1	16	White	2	H9	H	9	2785934	12846	0.00438668	2	2.21281	1.57993
Sample_4311-JM-78	Sample_4311-JM-169	2	3	27	Black	2	A10	A	10	2783950	12713	0.00377629	2	2.71002	1.00119
Sample_4311-JM-79	Sample_4311-JM-170	2	3	27	Black	2	B10	B	10	1215415	9302	0.0149447	2	0.94482	1.52813
Sample_4311-JM-8	Sample_4311-JM-171	2	3	27	Black	2	C10	C	10	2397317	10488	0.00412837	2	0.195697	-0.153593
Sample_4311-JM-81	Sample_4311-JM-173	2	3	27	Black	2	E10	E	10	2395426	14805	0.0096271	2	-0.0632218	0.0631943
Sample_4311-JM-82	Sample_4311-JM-174	2	3	27	Black	2	F10	F	10	3069439	14797	0.00449789	2	3.07025	-0.346904
Sample_4311-JM-84	Sample_4311-JM-176	2	3	27	Black	2	H10	H	10	2310287	12510	0.00498683	2	2.08483	0.900286
Sample_4311-JM-85	Sample_4311-JM-177	2	3	27	Black	2	A11	A	11	2537003	12833	0.00351281	2	3.00758	1.01483
Sample_4311-JM-86	Sample_4311-JM-178	2	3	27	Black	2	B11	B	11	4082589	14254	0.0040609	2	3.19202	0.607202
Sample_4311-JM-89	Sample_4311-JM-181	2	3	27	Black	2	E11	E	11	2302534	12576	0.00371721	2	1.28592	0.707482
Sample_4311-JM-90	Sample_4311-JM-183	2	3	27	Black	2	G11	G	11	2004946	12499	0.00352029	2	2.60757	0.944278
Sample_4311-JM-92	Sample_4311-JM-185	2	3	27	Black	2	A12	A	12	1842402	14120	0.00222101	2	0.459427	0.362951
Sample_4311-JM-93	Sample_4311-JM-186	2	3	27	Black	2	B12	B	12	3074985	14612	0.00322928	2	0.73294	0.172354
Sample_4311-JM-94	Sample_4311-JM-187	2	3	27	Black	2	C12	C	12	3530347	13629	0.00343592	2	2.91315	0.438184
Sample_4311-JM-95	Sample_4311-JM-188	2	3	27	Black	2	D12	D	12	3403785	14659	0.00211676	2	2.72372	0.218312
Sample_4311-JM-96	Sample_4311-JM-189	2	3	27	Black	2	E12	E	12	1247370	11667	0.0312193	1	-2.13021	-0.56283
Sample_4311-JM-97	Sample_4311-JM-190	2	3	27	Black	2	F12	F	12	2654582	13191	0.0056491	1	-1.87804	-2.18304
Sample_4311-JM-98	Sample_4311-JM-191	2	3	27	Black	2	G12	G	12	2555936	14184	0.00138892	2	3.23006	0.0505534
