# Supplementary material for: Single-oocyte transcriptional profile of early-stage human oocytes reveals differentially expressed genes in the primordial and transitioning stages
Source: Research Square preprint supplement (doi:10.21203/rs.3.rs-6957514/v1), 2025-07-03
Supplement: Supplementary file 5 [file eb41267a5b4e3efc7795d559.xlsx]

## Sheet: oocyte133.g557.scaled
	Sample_3799-JM-50	Sample_3799-JM-63	Sample_4311-JM-120	Sample_4311-JM-126	Sample_4311-JM-127	Sample_4311-JM-133	Sample_4311-JM-136	Sample_4311-JM-140	Sample_4311-JM-143	Sample_4311-JM-145	Sample_4311-JM-146	Sample_4311-JM-147	Sample_4311-JM-148	Sample_4311-JM-149	Sample_4311-JM-154	Sample_4311-JM-155	Sample_4311-JM-156	Sample_4311-JM-16	Sample_4311-JM-160	Sample_4311-JM-161	Sample_4311-JM-162	Sample_4311-JM-163	Sample_4311-JM-164	Sample_4311-JM-165	Sample_4311-JM-168	Sample_4311-JM-177	Sample_4311-JM-179	Sample_4311-JM-184	Sample_4311-JM-192	Sample_4311-JM-24	Sample_4311-JM-25	Sample_4311-JM-27	Sample_4311-JM-28	Sample_4311-JM-31	Sample_4311-JM-34	Sample_4311-JM-35	Sample_4311-JM-37	Sample_4311-JM-39	Sample_4311-JM-46	Sample_4311-JM-51	Sample_4311-JM-56	Sample_4311-JM-63	Sample_4311-JM-64	Sample_4311-JM-70	Sample_4311-JM-71	Sample_4311-JM-73	Sample_4311-JM-96	Sample_4311-JM-97	Sample_3799-JM-35
PCDH17	-0.439439	-0.439439	-0.439439	-0.439439	-0.439439	-0.439439	1.0577	-0.439439	2.76318	-0.439439	-0.439439	-0.439439	0.157955	-0.439439	-0.439439	-0.439439	2.32781	0.420492	2.14114	-0.439439	-0.439439	-0.439439	-0.439439	-0.439439	-0.439439	-0.439439	-0.439439	2.54119	2.8707	0.252449	0.799662	-0.439439	-0.439439	-0.439439	2.00929	2.50292	2.3259	-0.439439	2.51971	0.267864	-0.439439	-0.439439	3.16377	-0.439439	3.66786	-0.439439	-0.439439	-0.439439	-0.439439
SPRR2F	1.24296	0.410235	1.43448	1.12602	0.803048	0.385643	1.90755	0.884381	1.86781	0.134727	0.582177	1.14717	1.31794	0.675561	0.357916	-0.818007	1.09792	1.26535	1.86279	-0.138279	0.571071	0.593884	0.440282	1.64522	1.73708	-0.649778	-0.190918	1.79199	2.58612	1.14066	-0.575455	-0.355316	-0.768025	-1.21656	-0.0943865	0.881454	0.306622	1.3955	1.63549	-1.21656	1.27012	1.44032	0.989697	0.796896	1.49179	1.0668	1.51117	0.0716531	1.0335
ENC1	0.999034	1.34866	-1.03059	1.77062	-1.03059	-1.03059	1.21128	-1.03059	1.37054	-0.426413	-1.03059	1.43407	1.16546	0.677728	1.60656	0.58508	1.61195	1.68007	1.90097	0.899086	0.775401	-0.0670393	-0.26771	-1.03059	-0.0539889	-1.03059	-1.03059	1.71093	1.47581	1.06068	0.0807007	0.505795	-1.03059	-1.03059	0.0720583	0.550864	1.42115	0.994714	1.97184	-1.03059	1.74319	1.36164	0.683858	1.06884	1.12703	0.559742	-1.03059	0.861465	-1.03059
G0S2	1.34908	0.708896	0.442301	1.77097	-1.29679	0.798089	1.63564	-0.257286	1.30625	-0.449844	0.668988	1.73842	0.628315	0.104579	0.616035	-0.0260501	1.51041	1.45115	1.93717	0.8401	1.07218	0.323294	0.811121	0.618142	1.36516	-1.29679	0.591639	1.49699	2.25709	0.873889	0.391953	0.0871605	-0.247898	0.474047	0.244372	0.805383	0.703461	1.55213	1.99779	0.736978	0.523251	1.58967	1.26303	1.58861	1.70478	1.271	0.831116	0.745594	0.218399
BEX1	-0.758033	0.254968	-0.758033	0.307754	-0.758033	0.622993	1.50573	0.936649	1.95642	0.142525	-0.758033	0.914276	-0.758033	0.686632	-0.758033	-0.758033	-0.758033	1.38872	1.90322	-0.758033	-0.758033	-0.758033	-0.758033	1.05172	1.17873	-0.758033	1.16746	1.86949	2.87027	0.998669	-0.298116	-0.758033	-0.758033	0.614833	0.0903304	1.33923	1.19642	-0.758033	2.12861	-0.758033	2.14828	2.43751	2.11363	1.86072	2.45712	1.73519	1.54794	-0.758033	-0.758033
SEPTIN6	-0.00156016	0.872925	-0.984533	1.75036	-0.984533	-0.984533	2.01765	0.362372	1.17958	-0.984533	-0.984533	1.52775	0.804716	0.884912	-0.984533	0.627819	1.09317	0.705221	1.37673	-0.984533	0.727863	0.642969	0.0442466	-0.0662055	1.13521	-0.984533	-0.984533	1.74623	1.64466	1.46148	0.66992	0.405753	-0.984533	0.886019	-0.555659	0.340485	0.54177	-0.984533	1.77226	-0.984533	1.80688	1.35409	1.96489	1.66908	2.15694	-0.984533	1.39842	-0.984533	-0.984533
FOXL2	1.41245	1.27828	1.3636	1.93271	-0.0355572	-0.793055	1.39301	-0.793055	1.89035	-0.793055	1.09218	1.74416	0.819599	0.313456	-0.793055	1.19113	1.69758	1.7857	1.30578	1.03086	1.63471	-0.793055	0.968372	-0.793055	1.38819	-0.228286	1.3826	1.8296	1.92127	1.71567	0.74472	0.291784	-0.793055	0.84849	0.683526	0.899778	0.510989	1.54842	1.74011	-0.793055	1.38361	1.89953	1.57851	-0.23196	1.96798	1.38603	1.67748	-0.303511	0.766218
HOPX	0.73445	0.731774	-1.30875	0.451707	-0.74723	1.05133	1.81926	0.257133	1.60365	-1.30875	0.293584	0.449849	-1.30875	-1.30875	-1.30875	0.155352	1.11672	0.994655	0.903203	0.407665	0.317428	-0.741444	-1.30875	0.068399	-0.299281	0.556295	0.22081	1.36458	0.859376	0.580632	0.532868	0.403488	0.799651	0.911036	-0.46685	-0.00198393	0.84359	1.70863	1.30156	1.18603	1.7818	1.66605	2.11024	1.35728	2.21647	0.0691051	1.40916	-1.30875	-1.30875
LIPH	-0.537634	-0.537634	-0.537634	-0.537634	1.18906	1.46421	1.23794	2.09968	2.41533	-0.537634	0.773288	2.39379	-0.537634	-0.537634	-0.537634	-0.537634	-0.537634	2.00145	2.35816	-0.537634	-0.537634	0.120016	-0.537634	1.58951	1.37532	-0.537634	-0.537634	2.07557	2.65709	1.39223	-0.537634	-0.537634	-0.537634	-0.537634	-0.537634	1.54607	2.09448	-0.537634	2.89202	-0.537634	2.19167	-0.537634	2.43606	1.37334	-0.537634	0.357282	-0.537634	-0.537634	1.64589
FAM110C	-0.363532	-0.363532	-0.363532	-0.363532	-0.363532	1.3569	1.39668	2.32024	2.81837	-0.363532	-0.363532	2.73828	-0.363532	-0.363532	-0.363532	-0.363532	-0.363532	2.55962	1.49299	-0.363532	-0.363532	-0.363532	-0.363532	-0.363532	-0.363532	-0.363532	-0.363532	3.25658	-0.363532	2.87469	-0.363532	-0.363532	-0.363532	-0.363532	-0.363532	-0.363532	-0.363532	-0.363532	2.85223	-0.363532	2.30253	4.1728	4.37053	-0.363532	2.34214	-0.363532	-0.363532	-0.363532	-0.363532
SAT2	1.78885	0.432786	1.08552	1.2301	1.10744	0.28701	1.77644	1.1733	1.30799	1.03134	1.25271	1.02645	0.0406803	1.1967	0.688398	0.898673	1.32943	1.53205	1.432	1.08639	0.639699	0.590438	1.21196	1.08658	1.39668	-0.515635	0.663014	1.30431	1.74315	0.946836	0.783979	-0.178724	-1.34536	-1.34536	0.403741	0.817439	0.725604	1.93725	1.32766	0.693742	1.32206	0.762836	1.03739	0.626842	1.14585	1.25302	1.85637	0.307542	0.702289
ANP32E	0.718511	0.436266	1.28189	-0.821785	-0.821785	1.76126	-0.821785	0.998775	2.13576	-0.821785	0.244007	1.22174	0.734619	1.20783	1.26384	-0.821785	0.51278	1.54627	1.58798	-0.821785	1.50974	1.33298	1.35596	-0.821785	1.61679	1.75271	1.51857	0.811918	1.15702	1.79025	0.914579	-0.368243	0.638584	1.24491	0.68447	0.732676	-0.821785	-0.821785	2.12858	1.7432	1.92819	0.40042	2.28962	1.39283	1.57249	1.80456	1.32513	0.856077	0.762302
CD22	1.88218	0.18076	1.035	-0.733959	-0.733959	1.02471	1.3746	1.58171	1.92494	-0.16571	-0.733959	1.53802	1.40533	1.47023	0.537307	0.9647	1.85549	1.66461	1.85279	1.01865	-0.269593	-0.733959	1.75049	-0.733959	-0.733959	1.29863	1.81834	1.49415	1.64512	1.55948	0.237357	0.389012	0.411767	1.23532	-0.733959	1.49793	0.822643	2.04089	1.88853	1.53097	1.44015	2.1587	1.75244	1.46782	-0.733959	1.70076	-0.733959	1.3387	0.623934
TCEA3	1.38405	1.30786	0.928649	0.762496	1.07807	1.08661	1.81282	1.36659	1.89878	1.05397	0.590991	1.35307	0.946807	-0.449209	1.34847	1.00581	1.03442	1.58261	1.53281	-0.343273	1.20346	-0.925568	0.623405	-0.925568	1.22469	-0.925568	1.31019	1.6907	1.74766	1.44869	1.14112	0.150192	-0.925568	-0.925568	0.710915	1.42611	0.983451	1.11391	1.88224	-0.925568	1.57578	-0.925568	1.19558	-0.925568	1.37948	-0.925568	1.59679	-0.164839	0.790202
PDGFC	0.0701986	1.33572	-0.735171	1.69698	-0.735171	-0.735171	1.52417	1.0012	1.80255	-0.735171	-0.735171	1.23687	-0.735171	1.6985	-0.735171	1.31529	2.12574	1.96997	1.61959	1.03171	1.15236	-0.735171	0.834267	-0.735171	-0.735171	-0.735171	0.140654	1.76716	0.492051	1.83492	0.9312	-0.735171	-0.735171	-0.735171	1.02136	1.16741	0.643592	2.11385	1.81669	-0.735171	1.69177	-0.735171	2.42345	1.33205	1.82047	1.27711	1.41015	0.927237	-0.735171
IGFBP5	0.537264	1.94723	0.128505	1.34264	-0.346115	0.809999	1.78325	1.39228	1.16917	0.724434	-0.226013	1.01636	0.867428	0.854666	1.46113	0.373495	0.44339	2.02343	1.0861	-0.17107	0.0486546	-0.0490394	0.971833	0.190272	1.41269	0.526436	1.6531	1.44438	0.986526	2.17553	1.30352	-0.0607431	-0.586166	0.0214753	0.105486	0.971568	-0.34543	2.20643	1.49734	0.0582376	0.718166	-0.453485	1.1195	0.682596	0.426564	2.02679	1.49021	0.628057	0.31445
APOE	1.08132	0.335121	1.14086	1.15636	0.115775	0.0253261	1.32637	1.17837	1.29251	0.595994	-0.0649532	1.16335	0.663611	0.854524	0.559028	0.57568	0.895376	1.40343	1.25414	0.353455	0.800553	0.164142	0.701845	0.34173	0.888666	0.601596	0.445468	1.31437	2.24813	1.25418	0.539141	-0.34005	0.0436427	0.0423739	0.200988	0.722989	0.484163	1.11416	1.41198	0.313228	0.860936	1.55392	1.29376	1.08258	1.53267	1.28548	1.53183	0.138333	-0.785062
TGIF1	-0.922833	0.863826	-0.922833	1.30589	1.54128	-0.922833	1.44416	1.18728	1.19546	1.13645	-0.922833	0.996659	0.70264	0.936531	0.558439	1.09415	1.45292	1.38209	1.1526	0.676651	0.705635	-0.922833	1.08245	-0.922833	1.24777	-0.922833	-0.922833	1.69217	-0.0295575	1.3913	0.212687	-0.922833	-0.247636	-0.922833	0.932593	-0.922833	-0.414972	-0.922833	2.1523	0.853446	1.82	1.71018	1.82122	1.49278	1.67976	1.63866	1.80624	0.802365	0.963742
MIR202HG	2.1375	-0.327524	0.630858	1.07049	0.485751	-0.328899	2.03701	0.465512	1.9786	-0.145212	0.301911	1.17609	-0.260081	1.16308	-1.09167	-0.00360481	1.19343	1.35951	2.21059	1.12311	0.0160355	-1.09167	0.632862	0.256985	1.179	0.157071	0.416211	1.69404	2.29178	1.08671	-0.0638968	-0.639171	-1.09167	-1.09167	-0.200066	1.42005	0.893245	1.44946	1.85189	-0.577821	1.65988	1.88362	1.83356	0.259603	1.72325	1.43833	0.821465	0.817326	0.957649
S1PR1	0.781332	-0.557908	-0.557908	0.942853	-0.557908	-0.557908	2.50908	-0.557908	2.21634	1.41335	-0.557908	-0.0434032	1.53284	-0.557908	2.1229	0.294472	2.20714	0.548572	1.78496	-0.557908	0.798779	-0.557908	-0.557908	-0.557908	1.93509	-0.557908	-0.557908	2.30118	1.98325	-0.557908	-0.557908	-0.557908	-0.557908	-0.557908	-0.557908	1.34157	-0.557908	2.38584	2.36638	1.83991	1.0385	1.17655	2.30505	2.517	2.45749	-0.557908	-0.557908	-0.557908	-0.557908
WT1	-0.560918	-0.560918	0.100613	-0.560918	0.133951	1.83087	2.71172	-0.560918	1.17541	-0.560918	-0.560918	2.13861	0.410789	1.75868	-0.560918	-0.560918	0.61418	1.91959	2.07259	-0.560918	-0.560918	-0.560918	1.53955	-0.560918	-0.560918	-0.560918	2.13613	2.17967	1.74598	2.34009	1.5896	1.43825	1.4007	-0.560918	0.629509	1.25128	1.72899	2.24757	2.36271	0.690391	-0.560918	2.96427	1.71247	-0.560918	2.85192	1.68704	-0.560918	1.66974	-0.560918
PPP1R1A	-1.15551	-1.15551	0.407677	0.679406	0.321373	0.466984	1.24355	0.960115	1.44665	-1.15551	-1.15551	0.99567	-0.71407	0.276239	-0.126518	0.380906	0.865949	1.00372	1.1369	0.374706	-0.339444	-1.15551	0.205828	1.60648	-1.15551	-1.15551	-1.15551	0.980808	2.2727	0.969317	-0.110113	0.284898	-0.634762	-0.604494	-0.119272	0.780704	0.687273	-1.15551	1.96012	1.69189	1.31123	1.27418	0.673009	1.78018	2.1924	0.328715	1.66883	-1.15551	-1.15551
EPDR1	-0.599928	2.07805	1.6335	-0.599928	-0.599928	-0.599928	2.02539	1.57708	1.80339	-0.599928	-0.599928	2.14229	1.42171	1.63957	1.35695	1.68614	1.45996	1.3604	2.36206	-0.599928	-0.599928	-0.599928	-0.599928	1.74472	2.24397	-0.599928	1.60347	1.51948	0.841716	1.72636	0.294173	-0.599928	-0.599928	-0.599928	0.119082	1.21209	-0.599928	2.09395	2.32372	1.2513	-0.599928	-0.599928	-0.599928	2.167	-0.599928	-0.599928	-0.599928	-0.599928	-0.599928
NDP	-0.762171	0.566034	1.82379	1.59136	-0.762171	-0.762171	1.35427	1.96322	1.08448	-0.762171	-0.762171	1.7527	1.0931	0.887692	1.29417	1.11368	1.61444	-0.762171	0.92549	0.418693	-0.0543331	0.997102	0.930869	0.833258	1.72844	-0.762171	-0.762171	1.44006	0.869997	1.12194	-0.762171	0.694537	-0.0851894	2.20904	0.782974	1.00569	-0.015136	1.74461	1.77154	1.24294	1.51062	1.18085	1.84472	1.89742	2.03349	1.7213	1.76066	1.45048	1.40884
TMEM176B	0.259412	0.585824	0.283317	1.20355	0.351653	0.949849	1.46199	0.408083	1.19947	0.833138	0.947967	0.112681	-1.82008	0.494289	1.28571	0.486539	0.306528	1.14611	0.768392	-1.82008	0.519565	0.470832	-0.000903897	0.819647	1.31617	1.05906	1.51537	1.31817	1.69014	1.05669	0.481135	-0.642044	0.320211	0.289984	-0.0624386	0.560986	-0.210539	-1.82008	1.23692	0.550508	1.38322	1.43746	1.53426	-0.943554	1.27707	1.06014	1.40283	-1.82008	0.439846
TMEM176A	1.21869	1.44025	1.08857	1.49083	-1.20792	1.39318	1.8778	-1.20792	1.4455	-1.20792	0.142875	0.830504	0.52812	0.740576	0.85225	0.772847	1.31252	1.4453	1.29207	-0.244756	0.586138	0.588764	-1.20792	0.697082	1.47437	0.44073	-0.0071408	1.47828	1.60288	1.51229	0.777311	0.184598	-0.757768	0.839057	-1.20792	0.84343	0.414126	-1.20792	1.33048	1.10989	1.26976	1.61862	1.70769	0.891825	-0.414094	1.60526	1.66453	0.981566	-1.20792
WIPF3	0.59223	0.527506	0.563863	1.47747	0.746479	0.611419	1.79553	0.969128	1.50384	0.300809	0.424934	1.42435	0.274453	0.47688	0.600377	0.478631	0.546621	0.943615	1.48602	-0.221974	0.195534	0.153262	0.449791	0.681311	1.04672	-3.1586	0.824488	1.45875	0.99647	0.92428	0.182839	-0.762831	-1.64288	0.504327	0.175243	0.762486	0.953479	1.07058	2.25818	0.810736	1.04006	1.52811	1.24517	0.965332	1.73006	1.33647	0.955075	0.536017	-0.115152
BEX4	0.781427	0.862965	0.764191	1.01	0.641884	0.605057	1.45439	0.967406	1.00796	0.423152	0.414786	1.14252	-0.292701	1.07479	1.10619	0.33088	1.44503	1.15848	1.14591	0.860385	0.695669	0.346251	0.51976	-1.49496	1.0487	0.595624	0.532416	1.26293	0.426591	1.24181	0.0381756	-0.067932	0.68846	0.470908	0.620954	0.735585	0.167285	0.948871	1.46649	-1.49496	1.46463	1.40163	1.699	1.43042	1.6142	1.23118	1.4759	0.982527	0.928371
CLIC1	0.875349	0.766783	0.905301	1.15568	0.188654	-0.450163	1.35358	0.88511	1.39893	0.852527	0.310449	0.733814	0.62396	0.584607	1.15409	0.848177	1.27813	1.20544	0.859086	0.650571	0.458499	0.779371	0.511786	0.689671	0.747415	0.38725	0.412564	1.29836	1.27068	1.16402	0.683534	0.0201306	-1.29732	-0.517207	-0.840307	0.0999296	0.296496	1.55305	1.13939	0.53605	1.47566	1.7229	1.38665	0.951741	1.69584	0.907452	1.43212	0.366621	0.481059
CAVIN1	0.689764	1.23421	1.1292	1.35082	1.38629	1.18655	0.882409	0.91743	1.12346	1.06034	-1.28251	1.13141	1.264	1.34681	0.979345	0.998918	1.31893	1.167	0.807167	0.631449	0.283644	0.846336	-0.613165	-0.463733	1.39514	1.1894	1.26363	0.942573	0.93684	1.60328	0.964773	0.151792	0.598551	0.202352	-1.28251	0.105042	-0.603844	1.44094	1.12418	1.01407	1.22214	-0.305164	1.65523	1.28562	1.17235	1.35352	0.767568	-0.833048	0.500293
FHL2	1.3635	1.2788	1.30864	1.07551	0.995155	0.530494	1.28828	1.02529	1.20724	0.870886	0.769768	1.09399	0.919009	1.04613	0.958406	0.82664	1.19885	1.23962	1.09074	1.03293	0.739693	0.837796	0.910258	0.711863	1.4818	0.127375	1.21912	0.85961	0.488022	1.37655	0.686386	0.216678	-0.448947	0.380922	-0.123076	0.426857	0.356439	1.53658	1.17514	0.226171	0.696413	0.733146	1.18978	0.848815	0.993387	1.68749	1.65282	1.08692	-0.628292
JCAD	-0.633287	-0.633287	0.664587	-0.633287	0.0422106	-0.633287	1.91344	-0.633287	2.11529	-0.633287	-0.633287	0.428491	-0.633287	1.28392	-0.633287	0.157258	0.879184	1.92955	1.68717	0.0857485	-0.633287	-0.633287	1.60522	-0.633287	-0.633287	-0.633287	-0.633287	2.31247	2.47346	1.79256	1.22263	0.778298	-0.633287	-0.633287	-0.633287	1.12839	-0.633287	2.15366	2.44703	-0.633287	-0.633287	-0.633287	-0.633287	-0.633287	-0.633287	2.56425	-0.633287	-0.633287	1.80215
CCDC184	-0.465391	-0.465391	-0.465391	-0.465391	-0.465391	-0.465391	-0.465391	-0.465391	1.89998	-0.465391	-0.465391	1.9051	-0.465391	-0.465391	-0.465391	-0.465391	-0.465391	-0.465391	1.81552	-0.465391	-0.465391	-0.465391	-0.465391	-0.465391	-0.465391	2.54139	-0.465391	2.69965	2.48666	1.85407	-0.465391	1.73412	-0.465391	-0.465391	1.78201	1.56115	-0.465391	3.31524	2.23267	-0.465391	2.66672	-0.465391	1.53013	2.99564	2.67488	2.69223	-0.465391	-0.465391	-0.465391
IL6R	-0.356353	-0.356353	-0.356353	-0.356353	-0.356353	-0.356353	3.38227	-0.356353	0.61695	-0.356353	-0.356353	3.10369	-0.356353	3.5586	-0.356353	-0.356353	-0.356353	-0.356353	2.45504	-0.356353	-0.356353	-0.356353	-0.356353	-0.356353	-0.356353	-0.356353	-0.356353	2.2686	-0.356353	2.2589	-0.356353	-0.356353	-0.356353	-0.356353	-0.356353	-0.356353	0.974221	3.99285	3.02185	-0.356353	-0.356353	3.43748	1.10666	-0.356353	3.31072	-0.356353	-0.356353	-0.356353	-0.356353
EMX2	-0.870957	-0.870957	1.12186	0.5142	-0.870957	1.08598	0.922518	1.70482	1.445	-0.870957	-0.870957	1.09369	-0.870957	-0.0538741	1.34476	-0.870957	1.11631	1.491	1.72347	-0.870957	-0.870957	1.61325	0.4479	-0.104754	-0.870957	-0.870957	-0.870957	1.83508	1.93472	0.651096	0.0786451	-0.393623	-0.870957	-0.870957	0.0695842	-0.870957	1.19631	1.99014	2.67213	-0.870957	1.62223	1.49023	2.28511	-0.870957	1.79406	-0.870957	0.562869	0.977637	1.23329
C4BPB	2.40124	-0.628308	1.7813	-0.628308	-0.628308	-0.628308	2.50534	1.27654	2.11856	-0.628308	-0.628308	-0.628308	-0.628308	1.65842	-0.628308	1.25798	1.08548	1.85712	2.0282	-0.628308	-0.628308	-0.628308	-0.628308	-0.628308	-0.628308	0.0955335	-0.628308	1.51513	1.94076	2.08576	0.952836	-0.628308	-0.628308	-0.628308	1.0001	1.18207	0.319081	2.16787	2.54343	-0.628308	0.467898	-0.628308	1.67772	1.66924	1.24229	2.20244	2.15238	-0.628308	-0.628308
VWC2	2.2196	-0.511142	2.09365	-0.511142	1.05828	-0.511142	2.74722	2.05572	2.13001	-0.511142	-0.511142	-0.511142	-0.511142	-0.511142	-0.511142	-0.511142	-0.511142	2.11253	0.218119	1.36137	-0.511142	-0.511142	1.15212	-0.511142	-0.511142	2.36339	1.95314	1.74	1.58143	1.20361	1.67693	-0.511142	-0.511142	-0.511142	-0.511142	2.17795	-0.511142	-0.511142	2.33101	-0.511142	1.68725	-0.511142	-0.511142	-0.511142	-0.511142	3.26257	2.81434	-0.511142	1.31902
FKBP9	0.883103	0.597618	1.08087	1.56372	1.15405	0.871149	1.48591	-1.13417	1.47213	1.03863	-1.13417	1.03573	1.1118	0.848418	0.809144	0.750894	1.64331	1.17324	0.974529	0.890924	0.786038	0.377617	0.525109	1.23383	1.42899	-1.13417	1.33456	1.08913	1.32214	1.27052	0.762211	0.348523	-1.13417	1.02939	0.280524	0.745756	0.558766	1.92342	1.27415	-1.13417	1.61268	1.16643	0.803721	1.16326	1.05375	1.41212	1.50588	0.973999	0.456631
TMSB10	1.77256	1.93577	1.4413	1.17382	0.820063	0.160906	2.18376	1.19072	1.81365	1.0439	0.128718	0.761521	0.741215	1.18422	0.822081	0.700555	1.27973	1.15192	0.90325	1.42899	0.468771	0.395511	0.319445	0.664401	1.80841	0.304377	1.05821	1.01369	2.09259	1.22953	0.247526	-0.628759	-1.40449	0.604935	-0.779004	0.478796	-0.402789	2.55979	1.14292	0.0724373	1.25677	1.38735	1.4805	0.726496	1.4114	1.53342	1.64824	0.593835	0.0726862
GATA4	1.32386	0.832488	1.0276	-1.21417	-2.03458	0.584349	0.732391	-0.0531697	0.779648	-1.07993	-0.826613	0.831645	0.96829	0.96161	0.68333	1.19183	0.991534	1.09123	0.91626	0.425669	0.794775	0.353798	0.919951	0.713597	0.205586	-1.38204	1.08212	0.898664	0.995724	1.17195	0.706978	0.361442	-0.157555	-2.03458	0.0923035	0.510539	0.444263	1.25533	1.28059	0.269671	1.29841	-2.03458	-0.315127	-1.10195	1.11088	0.9553	1.01474	0.876107	-0.232969
COMT	1.25177	1.12717	0.888133	1.19859	0.721107	0.789255	1.26038	1.44679	1.22745	1.10045	-0.898699	0.62792	0.239485	0.698884	1.07095	0.659102	1.34499	1.25983	1.0973	-0.244756	0.711809	0.799733	0.638016	0.867786	1.61057	-0.867286	0.92429	1.44325	1.37871	1.16566	0.669137	0.00274628	0.00933061	0.260629	-0.0886137	0.357041	0.717993	1.82357	1.35625	0.521685	0.900278	1.13808	1.42466	1.22617	1.54778	1.38264	1.53738	-0.935973	0.887761
PEG3	1.17761	0.140821	1.1793	0.975561	-0.179631	0.799844	1.73733	0.335171	1.0776	0.0126996	0.804747	0.730266	1.13552	1.00965	0.764407	0.669961	1.24123	1.39125	1.13127	0.139779	-0.380807	-0.481143	1.20472	0.907885	1.80966	0.282969	0.549713	0.613536	1.2795	1.57448	0.8252	0.548352	0.144699	1.4011	-0.0168436	-0.0861846	0.742351	2.24503	1.81035	1.56693	1.63737	0.655795	0.991191	-1.34438	0.655831	1.00274	0.837358	-1.34438	0.0732242
S100A6	1.39382	1.49316	1.07768	1.32305	0.771479	0.466621	1.84319	0.987264	1.52237	1.04685	-0.43129	0.993343	0.210845	0.951051	0.419824	0.68609	0.991157	1.51848	0.863184	1.37996	0.558802	0.845447	-0.043166	-0.248613	1.80636	0.84592	1.44525	0.983599	2.19192	1.29585	0.513493	-0.208263	-0.964535	-0.641435	0.23247	1.01475	-0.182656	1.88055	1.25887	0.69024	1.25519	0.559388	1.84008	1.12867	1.00554	1.73371	1.77601	0.288866	-0.611966
PLS3	2.03639	-0.191349	0.458252	1.73109	-0.886629	1.30468	1.60937	-0.886629	1.56794	-0.886629	-0.886629	1.33927	1.35614	0.739084	0.748555	1.07106	1.95783	1.58145	1.4074	0.412605	0.987733	0.556462	1.32702	-0.886629	1.43994	-0.886629	-0.886629	1.37705	0.2082	1.9925	0.955283	-0.886629	-0.886629	-0.393721	0.480727	0.732796	1.22444	0.235125	1.27406	1.13602	1.76377	-0.886629	1.97581	-0.886629	1.11728	1.64773	1.29818	1.26859	-0.886629
TCEAL2	-1.11681	0.972547	-1.11681	1.12759	0.602734	-0.631701	2.27623	1.57137	1.68204	-1.11681	-0.274028	-0.715875	0.250631	0.377822	-0.575456	-0.682625	-1.11681	1.30458	1.67011	1.26618	0.963659	0.204483	-1.11681	0.609114	1.43028	-1.11681	1.11171	1.79079	1.68615	1.29505	0.50714	0.234757	-1.11681	0.412076	0.105674	1.20877	-1.11681	1.49894	1.78934	0.41378	-1.11681	1.21068	0.980471	0.591793	1.49785	1.39707	1.91348	0.438843	0.254638
TRIM38	2.58062	2.76089	-0.494742	3.25966	-0.494742	-0.494742	-0.494742	0.22074	2.50315	-0.494742	-0.494742	-0.494742	-0.494742	1.06786	-0.494742	-0.494742	2.30565	2.54133	1.76582	-0.494742	-0.494742	-0.494742	-0.494742	-0.494742	-0.494742	-0.494742	-0.494742	1.65431	0.393841	2.28506	0.407404	0.717176	-0.494742	2.51656	-0.494742	0.909044	-0.494742	-0.494742	2.13041	-0.494742	1.84185	2.00477	2.55354	-0.494742	1.25115	-0.494742	1.60787	-0.494742	-0.494742
SERPINH1	0.89319	-1.23062	1.33624	1.16284	0.752676	0.965133	1.49303	0.969383	1.6049	1.20241	-1.23062	1.0402	1.15671	1.21776	0.76837	1.43117	1.64559	1.17185	1.12974	0.634915	1.11487	-0.342439	0.885524	-1.23062	1.28387	-0.747251	1.04884	1.10393	0.0301279	0.924714	0.447992	0.314034	-1.23062	-0.201725	0.736383	0.654674	0.25244	1.43941	0.702593	0.637795	1.90047	1.09439	1.43176	1.20522	1.99937	1.47484	1.30956	0.643245	-1.23062
HRH1	0.118092	-0.738166	-0.738166	-0.738166	-0.738166	-0.738166	1.24453	-0.738166	1.62194	-0.738166	-0.738166	-0.738166	1.34774	-0.738166	1.85307	-0.738166	-0.738166	1.12796	1.74617	-0.738166	-0.738166	-0.0866907	0.866721	-0.738166	-0.738166	-0.738166	2.061	1.02926	-0.738166	1.47167	1.23037	-0.738166	0.778674	-0.738166	-0.738166	-0.738166	-0.738166	-0.738166	0.8658	-0.738166	1.49942	1.82293	-0.738166	0.462865	2.11959	-0.738166	-0.738166	0.784671	-0.738166
SPARC	1.26646	0.833959	1.32539	1.38269	0.794882	0.430784	1.33827	-0.907956	1.68093	0.853008	0.661972	1.2631	1.15841	1.33619	0.699818	1.56638	1.93634	1.2213	1.08008	0.296983	0.7607	0.905052	0.991628	0.541522	1.55031	0.76528	0.418974	0.76422	0.477118	1.51015	0.678807	0.209692	-0.338357	0.582039	-0.114661	0.688276	0.39223	1.68968	0.912862	0.774611	1.38045	-0.727271	1.15403	1.2352	0.683553	1.40953	1.1249	0.624365	0.0307137
PDK4	1.60825	-0.858825	1.0754	1.32688	0.7707	1.11038	2.1488	0.268743	0.422875	-0.858825	1.30725	1.60558	1.74056	0.371502	0.947904	1.04324	1.11398	1.52046	1.24768	0.905612	0.596682	0.558801	1.91328	1.88924	-0.858825	-0.23086	0.803204	-0.343282	0.126573	1.21411	1.36419	1.08865	0.363188	1.43376	-0.858825	1.23852	-0.298589	2.06825	1.75279	1.46053	1.32996	-0.858825	2.1473	1.69193	1.85029	1.14026	0.46053	-0.858825	1.01837
CHCHD10	0.733392	1.88718	1.14237	1.45753	0.673699	1.26021	2.60323	0.0746158	1.9238	-0.67052	-0.67052	1.33702	1.55471	2.15737	0.934146	0.835744	1.71049	1.69733	1.41865	-0.67052	-0.67052	-0.67052	1.14486	-0.67052	-0.67052	-0.67052	-0.67052	2.40738	3.11536	1.10746	-0.67052	-0.67052	1.20015	0.585638	1.13129	1.32068	-0.67052	-0.67052	0.878696	-0.67052	1.14299	2.73391	2.5041	1.57091	0.488654	-0.67052	1.62015	-0.67052	-0.67052
SAMD9L	3.26215	-0.456754	-0.456754	-0.456754	-0.456754	1.74358	-0.456754	0.787814	1.12105	-0.456754	-0.456754	1.46184	-0.456754	2.35131	-0.456754	1.62106	-0.456754	2.43115	-0.456754	-0.456754	1.81435	-0.456754	-0.456754	-0.456754	-0.456754	-0.456754	-0.456754	1.53564	-0.456754	2.38197	2.55422	-0.456754	2.2276	-0.456754	-0.456754	-0.456754	-0.456754	2.36245	-0.456754	-0.456754	-0.456754	-0.456754	-0.456754	2.74743	-0.456754	-0.456754	3.51949	-0.456754	-0.456754
FXYD6	0.851174	0.363385	0.431422	1.29547	0.644563	0.4648	1.20979	1.02523	1.20657	0.599244	0.534626	0.974937	0.284862	0.689166	0.801171	0.782077	0.817095	1.53697	1.00657	0.724453	0.82176	0.799358	0.602124	-0.0450944	1.44556	1.00416	1.03247	1.33362	1.264	1.25313	0.576675	-0.214437	-0.385933	0.82647	-0.278205	0.632514	0.329551	1.36597	1.66703	0.765059	1.16171	1.07836	1.20858	1.11792	0.882372	1.18147	1.59981	0.644027	0.151009
MRC2	0.534155	1.24442	1.07784	1.6321	0.813396	-0.331803	1.67159	1.1479	1.86157	1.52598	-0.984602	1.21894	1.14632	1.20501	-0.984602	1.48448	1.80787	1.66758	1.50972	-0.984602	0.457054	-0.984602	0.160826	0.563043	1.90825	-0.984602	1.69602	1.75884	1.89534	1.65473	0.649233	0.873971	0.723786	1.14424	-0.984602	0.199791	0.430708	0.844107	1.745	-0.178929	-0.394064	0.0589843	-0.984602	-0.984602	1.71165	1.86552	0.848555	0.713924	0.464498
PSMB8	-0.325876	-0.325876	-0.325876	-0.325876	-0.325876	-0.325876	5.18117	-0.325876	-0.325876	-0.325876	-0.325876	1.82028	-0.325876	2.57564	-0.325876	-0.325876	3.01667	0.800142	-0.325876	-0.325876	-0.325876	-0.325876	-0.325876	3.02164	-0.325876	-0.325876	-0.325876	0.63142	2.29026	1.57595	1.86677	-0.325876	-0.325876	-0.325876	-0.325876	-0.325876	-0.325876	-0.325876	3.51215	-0.325876	-0.325876	2.68744	2.28424	-0.325876	4.48176	-0.325876	-0.325876	-0.325876	-0.325876
FAM114A1	1.2183	-0.743364	1.6058	2.15543	-0.743364	-0.743364	2.14576	-0.743364	1.3948	1.28091	0.4972	1.28971	1.51454	1.26601	-0.743364	1.16838	1.54312	1.7863	1.58272	1.38011	1.3578	-0.743364	-0.743364	1.7093	-0.743364	1.89242	-0.743364	1.49717	0.532548	1.92984	0.695084	0.438313	-0.743364	-0.743364	1.06226	0.991444	-0.743364	1.67303	1.86715	-0.743364	1.53427	-0.743364	1.26355	-0.743364	-0.743364	1.99343	1.21731	-0.743364	-0.743364
APOL6	1.02041	-0.626308	2.30921	1.72277	-0.626308	-0.626308	-0.626308	-0.626308	1.45115	-0.626308	-0.626308	1.17956	-0.626308	-0.0282394	-0.626308	1.69562	0.331329	2.29227	0.484701	1.31853	-0.00209824	-0.626308	-0.626308	0.931305	2.22269	0.120867	-0.626308	0.638175	0.92336	1.96402	-0.0680601	-0.626308	-0.626308	0.776238	-0.626308	-0.626308	1.46611	2.08588	1.80849	-0.626308	1.40731	2.81988	1.691	-0.626308	2.21716	1.65238	1.84753	1.76579	-0.626308
LAMP5	1.11117	-1.14913	-1.14913	-0.221458	-1.14913	0.95714	0.974547	1.31872	1.43319	-1.14913	0.623123	0.491738	-1.14913	0.184104	-1.14913	-0.772367	1.38192	1.47584	1.22626	1.1974	0.814294	1.03182	0.540194	0.945565	-1.14913	-1.14913	-0.0180712	1.81099	0.814517	1.20577	0.413816	0.62939	0.27024	1.00662	1.12668	1.01839	1.34217	-1.14913	1.2997	-1.14913	1.06683	0.829213	1.44513	0.680789	1.49471	1.16603	1.56021	1.20763	-1.14913
LRATD1	-0.528636	-0.528636	1.58642	-0.528636	-0.528636	-0.528636	-0.528636	-0.528636	1.84931	-0.528636	-0.528636	-0.528636	1.73961	-0.528636	-0.528636	-0.528636	0.489482	0.238457	1.18157	-0.528636	-0.528636	1.98045	1.42577	-0.528636	-0.528636	-0.528636	-0.528636	1.14332	0.94883	1.59819	1.66821	0.322129	-0.528636	2.39768	-0.528636	1.80872	-0.528636	3.06399	1.76159	-0.528636	-0.528636	-0.528636	2.58981	-0.528636	-0.528636	2.49187	-0.528636	1.81538	-0.528636
VIM	1.1626	1.21563	2.36151	1.63463	0.592944	0.920964	1.94851	1.21219	1.47797	0.88852	-1.03481	0.403923	0.807384	1.05151	0.882149	0.798245	1.60858	1.78425	0.409381	-0.00888064	0.840582	0.352355	0.922785	-0.462348	1.28242	0.0909705	2.11322	0.925833	-0.416602	2.21975	1.06957	0.0674147	-0.156857	0.667028	0.280085	1.00392	-0.565554	2.25876	1.49073	1.01626	2.10992	0.909938	2.19527	1.22027	1.08962	1.99373	2.18413	0.527916	-0.140651
CLU	-1.34355	1.0934	1.29634	1.05581	0.980931	1.28402	1.49081	0.661695	0.652345	0.169949	0.670936	0.953951	0.774425	0.207651	0.28534	0.262278	1.18506	1.35438	0.500594	0.722863	0.385175	-0.644633	0.914807	-1.34355	1.09315	1.02654	0.861611	0.743865	0.457085	1.74035	1.09637	0.596627	0.709005	0.542979	0.800074	1.28648	0.568093	2.1235	1.49214	-0.405164	1.00566	-1.34355	1.32405	0.86028	1.19228	1.66731	1.77166	0.843724	-1.34355
BST2	0.852915	0.980129	0.718797	1.33877	-0.225498	0.876942	1.23585	0.89433	0.896285	0.613384	0.0980074	0.964642	0.709009	0.672394	0.812275	0.804259	1.21014	1.47539	0.430063	0.867041	0.786563	0.757697	0.850489	0.0904653	1.22138	0.935586	1.48396	0.299427	1.34604	1.36975	0.940131	0.326188	-0.508031	0.750188	-0.243264	1.08427	0.11269	1.5561	1.1797	0.520068	0.68499	1.09041	1.3082	0.761938	1.13355	1.49993	1.63132	0.545123	-1.09766
ZBTB20	0.992583	1.30048	1.06521	-1.25125	0.497169	0.648535	1.32435	-1.25125	1.41666	-0.652352	-0.701114	1.32999	0.808422	1.2436	0.836252	0.857667	1.12206	1.46283	1.28142	-0.678054	0.424608	0.947508	0.824678	0.634178	-1.25125	0.128015	0.838842	0.650636	1.38021	1.70358	1.11721	0.90703	0.384922	-0.760701	0.94473	0.763202	0.3231	1.4156	1.8839	0.737512	-0.364063	1.348	1.52582	1.65552	-0.147026	1.82296	0.720893	-1.25125	-1.25125
PEAR1	-0.425419	-0.425419	-0.425419	-0.425419	-0.425419	-0.425419	-0.425419	-0.425419	2.94633	-0.425419	-0.425419	0.496648	-0.425419	-0.425419	-0.425419	-0.425419	2.70806	0.853486	1.6739	2.14785	-0.425419	-0.425419	-0.425419	-0.425419	-0.425419	-0.425419	-0.425419	2.66135	2.93102	0.644514	2.36314	-0.425419	-0.425419	-0.425419	2.3752	2.21536	2.7389	-0.425419	2.97244	-0.425419	1.70208	-0.425419	2.11945	-0.425419	-0.425419	2.72973	-0.425419	-0.425419	-0.425419
SULT1C4	-0.556162	0.738789	-0.556162	2.231	-0.556162	-0.556162	2.31271	-0.556162	1.46919	1.83236	-0.556162	2.00175	-0.556162	-0.556162	2.12569	-0.556162	1.91594	2.45304	0.839177	-0.556162	-0.556162	0.174609	2.19884	-0.556162	2.50149	-0.556162	2.05756	1.42639	0.67863	1.71997	1.81612	1.16632	-0.556162	-0.556162	-0.556162	0.828855	-0.556162	2.74282	2.42133	-0.556162	-0.556162	-0.556162	-0.556162	-0.556162	-0.556162	-0.556162	1.95179	-0.556162	-0.556162
LINC01785	-0.430219	1.56461	-0.430219	-0.430219	-0.430219	-0.430219	2.93019	2.7716	2.89316	-0.430219	-0.430219	-0.430219	-0.430219	-0.430219	-0.430219	-0.430219	-0.430219	1.99849	2.36063	-0.430219	-0.430219	-0.430219	-0.430219	-0.430219	-0.430219	-0.430219	-0.430219	2.71808	2.73629	1.29972	-0.430219	-0.430219	-0.430219	-0.430219	-0.430219	-0.430219	2.13577	-0.430219	2.86462	-0.430219	-0.430219	-0.430219	-0.430219	2.64905	2.64539	-0.430219	2.02763	-0.430219	1.80107
ZC3HAV1	-0.910761	0.747471	1.15476	-0.910761	0.0854857	0.68122	1.59261	1.14184	1.40317	-0.910761	-0.910761	1.37967	1.33401	1.51706	-0.371031	-0.910761	1.45272	1.47427	0.975051	-0.910761	1.3027	-0.33907	1.12368	-0.910761	1.91383	-0.910761	1.49639	1.50204	1.09177	0.51197	0.43394	0.768334	-0.910761	-0.910761	-0.910761	1.07614	-0.910761	2.07076	1.4398	1.36292	1.30607	1.80012	2.02914	-0.910761	0.573004	1.23691	1.25211	0.594524	1.08635
SNHG6	1.33609	1.8015	0.248773	1.1804	0.476052	0.890879	1.32597	1.30697	1.84171	0.755988	0.867127	0.797657	0.112959	0.838849	-0.234668	-0.452649	0.54547	1.15712	1.74844	0.81705	-0.696829	0.110894	0.251668	-1.54564	0.652623	-1.54564	0.292934	1.38211	2.35061	1.46678	-0.131886	-0.19879	0.295195	-0.694854	0.0543389	0.242658	0.577444	0.390567	0.975043	0.829359	1.49094	-1.54564	2.25912	0.407016	2.28435	1.55296	1.87473	-0.664948	-1.54564
AKR1C1	-0.505165	-0.505165	-0.505165	2.69087	-0.505165	-0.505165	1.25078	0.291475	2.95307	-0.505165	-0.505165	-0.505165	2.20509	-0.505165	-0.505165	1.95682	0.26708	3.30984	2.63971	-0.505165	1.27951	-0.505165	-0.505165	-0.505165	-0.505165	-0.505165	-0.505165	2.89834	3.07272	1.91488	1.73755	-0.505165	0.548125	1.28197	1.97278	-0.505165	-0.505165	-0.505165	2.10067	-0.505165	-0.505165	-0.505165	-0.505165	-0.505165	-0.505165	1.88451	1.5556	-0.505165	-0.505165
PRKAR2B	-0.139383	1.68457	0.808979	0.895817	1.03731	-1.51609	1.19923	1.0646	1.25352	-0.80767	-1.51609	0.341049	-1.51609	0.36455	0.773515	0.500874	0.4703	0.00151452	1.52262	-0.838071	0.895424	-1.51609	-0.621585	0.0460962	1.10833	0.767437	0.475493	0.934521	1.52409	1.10027	-0.213059	0.000754296	0.198588	-1.51609	1.0729	0.338226	0.582998	-0.195545	1.76868	0.285167	1.25487	1.46007	1.63852	-1.51609	1.3573	0.95745	0.394931	0.657965	0.481735
CALCRL	1.475	-0.522193	-0.522193	2.99094	-0.522193	-0.522193	-0.522193	-0.522193	2.23185	2.07862	-0.522193	1.83516	-0.522193	0.203162	-0.522193	1.91855	2.3247	1.46242	2.04628	-0.522193	-0.522193	-0.522193	-0.522193	-0.522193	-0.522193	-0.522193	-0.522193	1.15791	0.899802	2.19535	1.06135	1.3086	0.194946	-0.522193	-0.522193	2.03327	-0.522193	3.19014	2.74699	-0.522193	0.444347	-0.522193	-0.522193	-0.522193	-0.522193	2.55802	0.67281	-0.522193	-0.522193
TNS3	-0.711649	-0.711649	0.891341	-0.711649	0.344066	0.0574939	-0.711649	-0.711649	1.71582	-0.711649	-0.711649	1.22101	0.511751	1.53627	0.308448	1.44528	1.12697	2.03771	0.258353	0.39294	-0.711649	-0.711649	0.130437	-0.711649	1.11123	-0.711649	2.21613	1.59535	1.62356	1.06611	1.7975	0.984253	-0.711649	1.34778	-0.711649	1.36701	1.23774	2.21861	1.92323	-0.711649	2.07076	1.92895	2.19546	2.48865	1.87505	0.964806	0.658928	-0.711649	-0.711649
CHL1	0.230752	-0.633097	-0.633097	2.04187	-0.633097	1.33723	1.36718	-0.633097	1.74793	1.05422	-0.633097	1.26364	0.522234	0.835199	-0.633097	1.73407	1.15292	1.665	2.20814	0.713328	-0.633097	1.16008	-0.633097	-0.633097	1.45732	-0.633097	-0.633097	1.76834	1.13889	-0.633097	0.969856	-0.633097	-0.633097	-0.633097	1.28284	0.880859	0.293205	2.56772	2.10406	-0.633097	2.75047	2.19335	2.14525	1.641	2.36388	2.51541	0.300189	-0.633097	-0.633097
ACSS3	-0.560845	-0.560845	-0.560845	2.12339	-0.560845	-0.560845	0.922804	0.842288	0.662859	-0.560845	-0.560845	2.16218	-0.560845	-0.560845	-0.560845	-0.560845	2.26815	0.671489	1.33907	-0.560845	-0.560845	1.6751	1.14457	-0.560845	3.2668	-0.560845	-0.560845	0.163646	-0.560845	2.48181	1.61686	0.918358	-0.560845	-0.560845	-0.560845	1.44974	0.594174	-0.560845	1.35288	1.04171	1.96839	-0.560845	1.89135	1.82053	-0.560845	2.47941	1.96618	-0.560845	-0.560845
SH3BGRL	0.479478	1.1886	1.08961	1.38413	0.655414	1.04094	1.31902	0.927336	0.808208	0.335421	-0.7372	1.27589	0.835108	0.949832	0.473254	0.899822	1.40868	1.38709	0.962439	0.141234	0.997616	0.552691	1.00402	1.05658	1.27889	0.929275	0.698754	0.847811	0.436319	1.56083	1.29064	-0.191836	-1.25885	-0.418773	0.485076	1.01232	0.296762	1.66558	1.19368	1.18104	1.57364	-1.25885	1.77664	1.31483	0.692032	1.60375	1.27211	0.380294	-0.194548
HES1	0.723741	-0.071208	-0.715792	1.6293	1.32488	0.995499	1.85196	-0.715792	1.88303	-0.715792	-0.715792	0.886237	-0.715792	-0.715792	-0.715792	-0.715792	1.52404	1.65433	1.63164	-0.715792	-0.715792	0.707629	-0.715792	-0.715792	-0.715792	1.3583	1.02927	1.76198	1.28422	2.20391	1.42928	0.113443	-0.715792	-0.715792	1.06291	0.360029	1.09982	1.99913	2.32447	-0.715792	2.05492	2.72593	2.17013	2.27441	2.48755	-0.715792	-0.715792	0.99633	-0.715792
ARMCX2	1.22396	-0.742492	1.09246	1.86658	-0.742492	0.164656	1.21764	-0.742492	1.33269	-0.742492	-0.742492	0.986702	-0.742492	1.43538	-0.742492	1.53659	0.62412	1.41518	1.48288	0.144492	1.27677	1.01602	1.53385	-0.742492	-0.742492	-0.742492	0.0916104	1.20575	-0.0423899	1.9099	1.04514	-0.742492	0.922162	-0.742492	-0.742492	0.939047	-0.742492	1.97081	1.55123	1.76295	1.4072	-0.742492	1.92464	1.80998	1.87757	1.87757	1.65227	-0.742492	-0.742492
JUN	1.02145	0.56252	1.40057	1.46474	1.44105	0.799236	1.14704	-0.0309048	1.52203	0.0909247	0.251949	0.802831	0.950421	0.738934	0.213497	0.659975	1.00037	1.06187	0.680957	0.255749	0.607799	0.194974	1.00474	0.616867	-0.0265301	0.887307	1.12521	0.776623	0.614104	1.51897	0.800533	0.109854	-0.202389	0.771772	0.777763	0.963116	0.350082	1.33304	1.84454	1.17173	1.99397	1.99213	2.11895	1.67992	2.22209	1.65033	1.39684	-0.871838	0.301946
BEX3	1.28039	0.986619	0.843219	1.18966	0.50228	0.61602	1.62693	0.903881	1.37244	1.20109	0.247999	0.860041	0.617316	1.10948	0.909647	0.33732	1.53969	1.21872	0.991038	1.24134	0.473485	0.60067	0.499539	0.955603	1.14248	0.446077	0.882193	1.17931	2.2508	1.23133	0.645436	-0.610871	-0.570994	0.161204	0.0113005	1.04437	-0.182185	1.97059	1.42419	-0.117776	1.28933	0.758171	1.23923	1.10345	1.32376	1.15179	1.51378	0.508262	-0.128236
FOXL2NB	2.38194	1.11068	1.24034	1.518	-0.686787	1.14643	2.47208	-0.0639017	2.04879	-0.686787	-0.686787	0.991389	0.205732	0.753733	-0.0780184	2.50445	1.90527	1.43151	1.05962	-0.686787	-0.106715	-0.686787	-0.686787	1.7855	0.815491	-0.686787	1.05177	0.774649	1.87635	1.73325	-0.686787	-0.686787	-0.137304	-0.686787	-0.686787	-0.686787	-0.686787	-0.686787	1.03583	1.7129	1.25534	0.833119	-0.686787	-0.686787	1.78574	2.53212	2.41233	0.531729	-0.686787
LGALS3	-0.396255	0.950421	1.14809	1.11203	0.502692	-0.0504332	1.58891	0.982441	0.230215	0.868691	-0.168395	0.635171	-0.0669583	0.802453	0.620263	0.2975	0.647364	1.70581	0.486646	1.03811	0.503083	0.747728	0.662946	0.463421	1.3256	0.94394	1.57026	0.583436	1.08952	1.55308	0.755023	-0.394841	-0.579577	0.782458	-0.603134	0.961881	-1.06708	1.7328	0.910487	1.18564	1.74927	1.20389	1.55296	1.0129	1.39232	1.61653	1.37227	-0.0315701	-2.55037
CARD16	-0.518514	1.08343	-0.518514	-0.518514	1.66628	-0.518514	3.33983	-0.518514	2.12652	-0.518514	-0.518514	1.66677	1.30707	-0.518514	-0.518514	1.24676	2.89944	1.3173	1.57724	-0.518514	0.951158	-0.518514	-0.518514	-0.518514	-0.518514	-0.518514	-0.518514	1.53038	2.69038	2.29722	1.02797	-0.518514	0.251845	-0.518514	-0.518514	0.916875	0.349942	-0.518514	1.97664	-0.518514	1.9603	3.11424	2.30545	-0.518514	2.25547	2.20368	-0.518514	-0.518514	2.70758
FMOD	-1.18969	0.978615	1.16179	0.521119	-0.703551	0.598498	-1.18969	-1.18969	0.768009	0.950289	-0.467811	1.29151	1.40765	1.16736	1.30667	1.18622	1.85976	1.55814	1.19744	0.262837	1.17097	0.567772	0.726164	-0.354575	1.15104	1.12333	0.778957	0.414776	0.596295	1.72037	0.67391	-0.303198	-0.0995556	-0.74683	0.166287	0.863649	0.291387	1.67664	1.141	0.940205	1.62449	-0.0319927	1.47078	-1.18969	1.56266	1.46571	1.11546	0.665045	-1.18969
AXL	-0.798347	1.54064	1.33661	0.332102	0.887941	-0.798347	1.685	1.29467	1.4428	1.44711	0.662564	1.64023	-0.798347	-0.798347	-0.798347	1.1668	1.08007	1.39428	1.00739	0.651368	1.25173	1.30177	1.41266	-0.798347	1.57044	-0.798347	-0.798347	1.56157	1.75997	1.13253	1.19952	-0.798347	-0.798347	1.71298	0.532855	1.23753	0.698428	1.82529	1.77628	-0.798347	0.417673	-0.798347	1.94333	-0.798347	1.9297	2.11603	1.88209	-0.798347	1.04746
KLHDC8B	1.29194	1.3248	-1.11071	1.30834	0.98169	0.239591	1.48352	1.47009	1.33749	1.26926	-1.11071	0.89329	0.987505	0.581451	1.12081	-1.11071	-1.11071	1.425	1.21382	0.837752	1.05556	1.04479	0.479798	1.29369	0.808379	-1.11071	-1.11071	1.3988	1.17421	1.3319	0.702549	0.105221	-0.697496	-0.673479	-1.11071	1.18655	1.23136	1.97649	1.11021	0.91376	0.385784	1.36713	1.10548	1.16316	-1.11071	1.20525	1.54358	0.383867	0.790516
GABBR1	-0.627431	2.5085	-0.627431	1.17739	1.82273	-0.627431	1.09663	-0.627431	1.66504	-0.627431	2.06343	0.366064	1.85447	0.516683	-0.627431	-0.627431	2.32668	1.88371	1.65457	-0.627431	-0.627431	-0.627431	1.97987	-0.627431	1.99446	2.05882	-0.627431	1.60492	1.43027	1.65799	0.46496	-0.627431	-0.627431	-0.627431	-0.627431	1.15567	-0.627431	1.72902	1.73676	1.83651	-0.627431	1.85287	1.70819	-0.627431	1.52756	1.74149	1.72313	-0.627431	-0.627431
NRARP	2.81162	-0.434199	-0.434199	-0.434199	-0.434199	-0.434199	2.99179	-0.434199	-0.434199	-0.434199	-0.434199	-0.434199	-0.434199	-0.434199	-0.434199	-0.434199	-0.434199	-0.434199	1.71987	-0.434199	-0.434199	-0.434199	-0.434199	-0.434199	-0.434199	3.17825	-0.434199	2.56566	1.64094	-0.434199	1.83192	0.265613	0.752528	-0.434199	0.303633	1.04113	-0.434199	-0.434199	1.22383	-0.434199	3.97586	2.6171	-0.434199	0.559821	3.02756	-0.434199	-0.434199	-0.434199	-0.434199
LRP1	0.618263	1.12092	1.39712	0.844595	0.996072	1.012	1.38983	1.15332	1.21032	0.985759	-0.959226	1.18972	0.940483	1.15641	0.834741	0.855858	1.48423	1.51352	0.973581	1.06249	0.869889	1.11404	1.27811	0.161444	1.3093	-0.026151	0.689142	0.923238	0.84831	1.50345	0.983256	0.662765	0.247749	0.29902	0.468011	0.751538	0.610947	1.66507	1.365	1.01468	1.00658	0.841147	0.914275	-0.162433	0.341575	1.68312	1.45063	0.265963	0.35947
KRCC1	0.98096	-1.13614	0.839389	1.01208	-1.13614	-1.13614	0.712916	1.03894	0.7846	-1.13614	1.08029	0.885838	0.313053	-0.326149	-1.13614	0.686019	1.62648	1.14788	1.02941	-0.474195	0.370766	-1.13614	-1.13614	0.852844	-1.13614	1.3816	1.18373	1.00304	0.267002	-0.0327244	1.48813	0.652994	-0.600757	1.12916	0.751637	-1.13614	0.639373	1.75815	1.3333	1.60148	0.845864	1.36184	1.4973	1.17443	0.86354	1.32853	1.2408	0.733267	1.05863
PIP4P2	2.42733	-0.48382	-0.48382	1.92877	2.2343	-0.48382	3.0105	-0.48382	0.898659	-0.48382	-0.48382	2.18812	1.57243	-0.48382	-0.48382	2.35205	0.38317	2.09367	2.4641	3.06151	-0.48382	-0.48382	2.47349	-0.48382	-0.48382	1.23115	-0.48382	-0.48382	1.3705	-0.48382	1.69396	-0.48382	0.698696	-0.48382	-0.48382	2.10152	-0.48382	-0.48382	1.54089	-0.48382	-0.48382	-0.48382	-0.48382	-0.48382	-0.48382	2.39732	-0.48382	-0.48382	-0.48382
GAS6	0.153125	0.766435	0.534163	0.847479	0.22526	0.604699	1.09898	0.0271359	0.973559	-0.546067	-0.537362	0.771351	0.621069	0.665698	-0.0947833	-0.151248	0.609409	1.10366	1.04042	-0.386001	0.230022	-0.477098	0.699554	-1.26651	0.0964836	0.0841457	1.26979	1.54754	1.26668	0.715882	0.245185	0.11164	-0.119785	-0.207492	0.399564	0.921651	0.929138	1.7468	1.69083	-0.100808	0.867355	1.65583	1.28206	0.918383	1.75236	0.669293	0.836261	0.268988	-2.23013
ERAP2	-0.470179	1.69109	-0.470179	2.86465	-0.470179	-0.470179	-0.470179	2.77549	1.71141	-0.470179	-0.470179	0.0983837	1.97219	-0.470179	-0.470179	1.77	3.03756	3.03986	1.73215	-0.470179	-0.470179	-0.470179	2.16291	-0.470179	2.17682	-0.470179	1.57067	1.01165	1.61724	3.4814	1.5772	-0.470179	-0.470179	-0.470179	0.90868	-0.470179	-0.470179	-0.470179	-0.470179	-0.470179	2.65897	2.79745	-0.470179	-0.470179	-0.470179	-0.470179	-0.470179	-0.470179	-0.470179
N4BP2L1	-0.632328	1.97441	1.62517	-0.632328	-0.632328	-0.632328	1.64588	2.02438	1.73456	-0.632328	-0.632328	1.02067	-0.632328	-0.632328	-0.632328	-0.632328	0.286271	1.16156	1.71945	-0.632328	1.44875	-0.632328	-0.00361016	1.47481	2.18495	-0.632328	-0.632328	1.12482	0.166185	1.28661	-0.632328	0.879203	1.45708	-0.632328	1.33852	0.629165	1.33569	1.90108	2.39446	-0.632328	2.78961	2.38751	1.95733	-0.632328	2.45967	1.37193	1.03089	1.61628	-0.632328
ABO	-1.09528	-0.340451	1.03208	-1.09528	-1.09528	-1.09528	0.307023	0.664067	1.55508	-1.09528	-1.09528	0.744445	0.535228	0.494896	1.06686	0.39682	0.844124	0.648518	1.35946	0.919697	-1.09528	0.899432	1.4647	1.09399	-1.09528	-1.09528	-1.09528	0.372283	1.57051	1.49678	0.937432	1.07279	0.835709	0.642522	0.894219	1.33758	0.814388	1.09476	1.57651	-1.09528	-1.09528	1.56922	-1.09528	0.629215	-0.203443	1.37042	1.39674	0.887904	-1.09528
SCPEP1	-1.31871	-1.31871	1.24106	0.95594	-1.31871	1.08816	0.484643	1.37933	0.183948	-1.31871	-1.31871	0.314533	0.88057	0.80665	-1.31871	0.674476	0.357747	1.41371	1.14005	-1.31871	0.985855	0.820521	-0.586368	-1.31871	1.09419	0.925001	1.43813	0.967263	0.574858	1.56847	0.551987	-0.293188	0.0467637	0.831462	0.866733	1.02413	0.299081	-1.31871	1.54684	1.18024	-0.713603	-1.31871	1.63382	-0.347406	-1.31871	1.21259	0.938959	-1.31871	-1.31871
VSTM4	0.818681	0.255735	1.24783	-0.963023	1.26145	1.28979	-0.963023	0.0357789	1.23641	-0.963023	-0.963023	1.4422	0.277174	0.267726	1.36805	1.59681	1.74588	0.894416	1.47365	-0.348381	-0.183978	-0.963023	0.531159	-0.963023	-0.963023	-0.963023	-0.963023	1.40176	1.22593	1.17814	0.719109	1.17904	-0.963023	0.777233	-0.963023	1.25243	-0.140838	-0.963023	1.75081	-0.963023	0.5712	-0.963023	-0.963023	-0.963023	-0.963023	2.03932	1.58253	0.70191	0.571587
IGFBP4	0.556274	0.863416	0.621203	1.89361	0.539984	1.37601	1.85401	1.09318	1.08356	-0.480009	-0.204302	0.698521	0.0862673	0.793377	0.737723	1.01553	1.26145	1.78757	0.27985	0.325008	0.716101	0.805143	0.544207	0.162166	0.89058	0.957179	1.81842	0.263873	0.4842	1.90242	0.522358	-0.011021	-0.692349	0.256435	-0.384616	0.700793	-1.23333	1.54395	0.443751	0.979282	1.78694	0.435768	1.54808	0.829027	0.480801	1.434	1.61259	0.393821	-0.794522
RRAD	-0.484808	2.13277	-0.484808	-0.484808	-0.484808	-0.484808	-0.484808	-0.484808	2.21985	-0.484808	-0.484808	2.03549	-0.484808	-0.484808	2.17858	-0.484808	-0.484808	3.04608	2.5274	-0.484808	-0.484808	-0.484808	-0.484808	-0.484808	-0.484808	-0.484808	-0.484808	2.71698	2.44373	-0.484808	-0.484808	-0.484808	-0.484808	-0.484808	0.692219	2.5164	-0.484808	-0.484808	2.41769	2.1271	2.09675	-0.484808	2.14027	0.257767	1.91476	-0.484808	-0.484808	-0.484808	-0.484808
EMX2OS	-0.66022	1.21358	-0.66022	2.13805	-0.66022	0.810708	1.60647	-0.66022	1.93747	-0.66022	-0.66022	1.04398	0.461176	-0.66022	-0.66022	0.156432	2.28596	0.771437	1.96131	0.411329	0.86543	-0.66022	1.52444	-0.66022	-0.66022	-0.66022	-0.66022	1.8625	2.10116	2.1113	-0.66022	-0.66022	0.715201	-0.66022	1.86295	-0.66022	-0.66022	-0.66022	2.39615	-0.66022	2.05273	1.00153	1.03906	2.21809	0.399208	0.886335	-0.66022	-0.66022	-0.66022
GBP4	-0.555532	2.38531	-0.555532	1.36948	1.82425	1.03956	1.95966	1.94414	2.10794	-0.555532	-0.555532	2.17932	-0.555532	2.59415	-0.555532	1.84061	2.96077	0.239431	1.33152	0.838401	-0.555532	-0.555532	1.40258	-0.555532	-0.555532	-0.555532	2.82643	1.08183	2.19213	1.20663	-0.555532	0.824351	-0.555532	-0.555532	-0.555532	1.32006	2.13606	-0.555532	2.85891	0.642387	-0.555532	-0.555532	-0.555532	-0.555532	1.24654	-0.555532	-0.555532	-0.555532	-0.555532
ATP1A1	-4.21629	0.0682615	0.0707925	0.636196	-1.35105	-0.120885	1.12639	0.647789	1.37264	-0.284656	-0.342714	0.13458	0.414028	0.194989	0.0612985	-0.0535284	0.495947	1.23643	0.914304	-1.06816	-0.91599	-1.04654	-0.365114	0.199939	-0.453887	-0.680079	0.590721	0.426976	0.748825	0.958611	-0.186149	-0.671844	-0.482964	-2.66603	-0.610649	-0.0783384	-0.120596	0.993061	1.01925	1.49506	1.02865	0.31286	1.10036	0.720788	1.22103	0.546118	0.111485	-0.283519	-2.03238
PDGFRB	0.965057	1.0611	0.930704	1.05951	-1.43425	-0.743588	1.1017	1.02348	0.418247	1.1349	-0.252978	1.15209	1.14763	-0.286571	-1.43425	0.414559	1.01597	0.960071	0.71557	0.908245	0.0542998	0.237065	0.813065	-1.43425	-1.43425	-1.43425	-1.43425	0.614823	0.743191	0.885008	0.589617	-0.806877	-0.294327	0.810208	-0.274464	0.217644	-0.290206	1.82682	0.821852	0.919049	1.18182	1.43494	1.53181	0.715452	-0.151951	1.22968	0.911482	1.267	-1.43425
IFITM2	0.892771	1.03519	1.03543	1.23254	0.579963	0.542565	1.54562	0.937817	0.913499	0.800176	0.350533	0.359794	0.847132	0.491445	0.6381	0.694012	1.23708	1.56342	0.56837	0.743975	-0.0966987	0.685311	0.161592	0.103397	1.28701	0.761556	1.41353	1.01405	2.03653	1.41112	0.330294	-0.734818	-0.827818	-0.0489445	-0.228653	0.161602	-0.51204	1.36652	0.738426	1.09879	1.88473	1.70377	2.2569	1.34162	2.01036	0.64781	0.453826	0.401761	-0.445512
MARCKSL1	0.459993	1.10398	1.2841	-0.0300321	0.0016419	0.26627	1.42141	1.47044	0.851566	0.289206	0.920891	0.811598	0.493863	0.580373	0.163661	0.762449	1.69715	1.48943	0.945983	-0.0156188	0.759265	-0.324269	0.987111	0.32155	1.70926	1.04804	1.82287	1.61697	-0.170964	1.18772	0.335421	-0.654088	-0.350643	-0.158158	-1.06101	0.502054	0.261359	2.27424	1.95766	0.498661	1.44766	-0.426735	1.8676	0.918564	1.09414	-0.31779	1.93722	1.18444	-0.0268412
ZMIZ1	1.36572	1.35374	1.25164	1.69153	-0.949334	1.67758	1.74554	1.63517	1.47551	-0.949334	1.31132	0.926677	0.300823	1.40489	1.54817	1.15665	0.803049	0.81862	1.5828	-0.949334	-0.420321	0.857347	1.50681	-0.949334	-0.949334	-0.949334	-0.949334	1.21328	1.16417	1.68928	1.20324	-0.50643	-0.949334	-0.949334	0.0478375	1.2081	0.512775	2.41435	1.49967	0.763163	-0.273942	0.576881	1.76547	-0.949334	0.244238	1.84213	1.92781	0.765924	1.14923
MAMLD1	2.67104	-0.467894	-0.467894	-0.467894	-0.467894	-0.467894	2.92536	-0.467894	1.70273	-0.467894	-0.467894	1.72845	1.45219	-0.467894	0.589532	1.77256	-0.467894	3.08384	2.30926	-0.467894	1.66599	-0.467894	-0.467894	-0.467894	-0.467894	-0.467894	1.2621	1.95886	1.37077	2.01641	0.144406	-0.467894	-0.467894	-0.467894	-0.467894	-0.467894	-0.467894	-0.467894	1.40589	0.183029	-0.467894	2.89105	2.72216	-0.467894	3.20721	0.56775	-0.467894	-0.467894	-0.467894
C1orf141	-0.311798	-0.311798	-0.311798	3.10633	-0.311798	-0.311798	1.93123	-0.311798	0.965527	-0.311798	-0.311798	-0.311798	-0.311798	-0.311798	-0.311798	-0.311798	-0.311798	-0.311798	4.16363	-0.311798	-0.311798	-0.311798	-0.311798	1.1861	-0.311798	-0.311798	-0.311798	0.783512	1.78176	3.19256	-0.311798	-0.311798	-0.311798	-0.311798	-0.311798	-0.311798	-0.311798	-0.311798	4.96852	-0.311798	3.20875	-0.311798	4.29963	-0.311798	-0.311798	-0.311798	-0.311798	-0.311798	-0.311798
SCD	1.49737	-1.24837	-1.24837	0.863314	-1.24837	-1.24837	-0.0334944	1.09957	1.15376	0.701013	-0.111021	1.17767	-1.24837	0.595978	0.645563	0.577574	1.09269	1.02088	1.51423	0.107715	0.708008	0.755272	0.599217	0.59713	1.5707	-0.633974	1.20319	1.15971	1.18265	1.05532	0.584645	0.0473683	0.310286	1.20352	0.711269	0.288271	0.722475	-1.24837	1.42791	-1.24837	0.621694	1.68745	1.48962	-1.24837	0.502445	1.05092	1.42953	-1.24837	-1.24837
MARCKS	1.40951	1.05339	0.611949	1.22462	0.327284	0.805714	1.4109	0.950214	1.50401	-1.1153	-2.34407	0.284953	0.054228	0.766318	-0.423116	0.56727	0.605016	1.34116	1.20091	0.304217	-1.07601	0.135876	-0.277611	0.228519	0.603902	-2.34407	0.53605	1.38068	1.34086	0.770895	0.0128285	0.239372	-0.322539	-0.394915	0.544347	0.544098	0.294042	-2.34407	1.05915	0.225042	1.46716	0.561911	0.60578	0.524501	0.685625	1.15794	1.47217	0.0196994	0.166697
AMHR2	1.17661	-0.19738	-0.372065	1.20311	-0.871525	0.300073	2.23501	0.32502	1.70739	-0.288042	-0.871525	1.26387	1.24293	1.2072	-0.871525	0.6158	1.26829	1.40043	1.90615	0.826297	0.94586	-0.871525	0.946663	1.55558	1.25921	0.630897	-0.871525	2.09064	1.68086	1.21218	0.656805	-0.260257	-0.194566	-0.393601	0.561027	1.24115	0.149531	2.04118	2.10406	-0.871525	1.48897	2.16954	1.62079	1.64535	-0.871525	1.66757	1.36982	-0.871525	0.834617
LPP	1.13253	1.41088	0.655769	0.693207	-0.224109	1.37133	1.52474	1.30682	1.6375	-0.41977	-0.470834	1.22913	0.723918	1.38582	1.85776	0.551758	1.40355	1.54516	-0.134728	-0.446684	1.13638	1.36231	-0.508787	0.559963	0.846884	-1.04695	1.31638	0.892893	0.489076	1.67819	0.821028	0.650029	-0.0339403	-1.04695	1.1531	-1.04695	-0.49963	-1.04695	1.77323	1.46958	1.54719	1.21826	1.63201	-1.04695	0.875721	1.95539	0.908318	-1.04695	-1.04695
TRIM69	-0.5732	-0.5732	-0.5732	2.43546	-0.5732	-0.5732	1.69574	-0.5732	1.65627	1.84901	-0.5732	0.322471	1.4419	-0.5732	-0.5732	-0.5732	1.50537	1.60447	-0.5732	-0.5732	-0.5732	-0.5732	-0.5732	-0.5732	3.01483	-0.5732	2.77008	0.490855	0.222066	0.882793	-0.5732	-0.5732	-0.5732	1.65783	-0.5732	1.73066	-0.5732	-0.5732	2.04692	-0.5732	1.59944	-0.5732	1.75544	0.135959	1.53666	-0.5732	-0.5732	1.75452	-0.5732
RHBG	-0.83641	-0.83641	1.49195	1.03055	-0.83641	-0.83641	2.30891	-0.83641	1.68882	-0.83641	-0.83641	1.85328	-0.83641	-0.83641	0.634637	-0.83641	1.32221	1.58579	0.952621	1.5104	-0.242182	-0.83641	1.01492	-0.83641	-0.83641	-0.83641	-0.83641	1.5771	1.8592	1.22102	1.44361	-0.338906	-0.273517	0.595039	0.396344	0.415526	1.19189	1.6778	2.13737	0.768627	2.05321	1.72928	1.14009	-0.83641	1.26601	0.612651	-0.83641	0.624705	1.78464
KIRREL1	1.33394	-0.627821	-0.627821	-0.627821	1.87168	-0.627821	1.87877	1.3801	1.44179	0.622184	-0.627821	1.79507	0.713391	-0.0553741	-0.627821	0.994118	-0.627821	2.18763	1.01153	-0.627821	0.451909	-0.627821	-0.627821	-0.627821	2.39227	-0.627821	1.35193	1.63353	1.36327	1.76494	0.367305	-0.627821	-0.627821	-0.627821	-0.627821	1.38894	1.2491	-0.627821	0.923074	-0.627821	2.05309	3.09852	3.0892	-0.627821	0.720202	2.327	-0.627821	-0.627821	1.6923
APOBEC3C	1.5814	0.354454	1.14934	1.37492	0.834296	0.537646	1.83909	-1.13899	1.48829	0.550714	-1.13899	1.10571	0.881068	1.02223	0.767165	1.19385	1.40515	1.73807	1.1093	1.29673	-1.13899	0.0163064	1.0396	0.815733	0.289322	1.68523	1.06574	0.989857	1.4799	1.52661	1.14008	0.41122	-0.0163478	0.893672	1.07068	1.13103	0.506094	2.25575	1.58286	0.162801	-0.0992722	-1.13899	1.28353	-0.314471	-0.333893	1.36257	0.981497	-1.13899	1.09608
EGFR	-0.445325	-0.445325	-0.445325	-0.445325	-0.445325	-0.445325	3.27151	-0.445325	2.11708	-0.445325	-0.445325	-0.445325	-0.445325	-0.445325	0.771475	2.26896	-0.445325	2.7098	2.01354	0.885794	-0.445325	1.09221	2.06851	-0.445325	1.11304	-0.445325	2.63085	0.328883	-0.445325	2.55097	-0.445325	0.804776	0.300968	-0.445325	2.60705	1.70324	-0.445325	-0.445325	2.79708	-0.445325	-0.445325	-0.445325	-0.445325	-0.445325	2.86663	-0.445325	2.0408	-0.445325	-0.445325
GATM	0.100317	0.238297	0.263484	0.62586	-0.979589	-0.0352779	0.935357	0.684104	1.39483	-0.60822	0.412112	1.15868	0.296309	0.395693	0.426105	-0.137542	0.455539	0.997097	1.61334	-2.44371	-0.113407	0.0274785	-0.452474	0.745723	0.419126	-2.68525	0.734992	0.500018	0.0509857	1.09147	0.534982	-0.123903	0.183689	-0.429291	0.180163	0.808465	0.140987	0.647857	2.04346	0.0246566	1.77657	0.916029	1.60228	0.968533	0.725861	0.866505	-0.24357	0.0844312	0.362978
MKX	-0.401253	-0.401253	2.13209	-0.401253	-0.401253	-0.401253	2.12159	-0.401253	2.56387	2.01457	-0.401253	1.13957	2.64385	1.68813	1.26636	2.47107	0.965565	-0.401253	-0.401253	-0.401253	-0.401253	-0.401253	-0.401253	-0.401253	-0.401253	-0.401253	-0.401253	-0.401253	0.786884	0.844623	-0.401253	-0.401253	-0.401253	-0.401253	-0.401253	-0.401253	1.50658	-0.401253	-0.401253	-0.401253	-0.401253	3.28846	3.452	3.06525	-0.401253	-0.401253	-0.401253	2.90821	-0.401253
GYPC	1.09348	1.29687	1.62522	1.01609	-0.752854	1.04142	1.79597	-1.28096	1.18591	1.16761	0.941191	0.964194	0.840992	0.978516	0.730101	1.09829	1.34814	1.54428	0.827545	1.06324	0.694018	0.895195	0.617735	-1.28096	1.42821	-1.28096	1.45748	0.420314	1.32178	1.58101	0.82975	0.0924805	-1.28096	0.957668	-0.0859308	0.969883	0.411125	1.48975	1.14532	0.693185	0.467745	-1.28096	1.22785	1.05272	0.103802	1.50362	1.71946	1.10332	-0.180188
MYC	-0.938116	1.247	1.2579	1.45955	1.57249	-0.165338	2.10481	-0.457898	1.49221	0.782356	-0.938116	0.892027	0.638633	0.110675	1.09941	-0.938116	0.839478	1.99133	0.727687	0.749742	-0.938116	-0.938116	0.231841	1.01517	-0.938116	-0.402808	2.02555	1.10647	0.0575226	2.05027	1.17664	0.679898	0.0317596	-0.272979	0.794544	1.06682	-0.938116	2.30527	1.42531	1.01471	1.52622	1.63671	1.81367	1.29075	1.89923	0.73168	0.966029	-0.474109	-0.938116
TRIM56	1.24153	-0.665691	0.230046	1.01683	-0.665691	-0.665691	2.46682	2.05186	2.15919	-0.665691	-0.665691	1.33591	1.13941	1.34412	0.231434	0.86047	1.7132	2.19335	1.99145	0.0146084	1.50539	-0.0199984	-0.665691	-0.665691	1.74856	1.8768	2.03326	1.66152	2.12347	2.05779	2.1453	-0.665691	-0.665691	-0.665691	1.3515	0.359536	0.868541	1.63076	2.0761	-0.665691	0.387267	-0.665691	1.54935	0.524679	1.45475	0.212954	1.71109	0.977664	0.666454
SERPING1	0.194926	0.41271	1.13568	0.54795	0.311828	1.022	1.46788	1.09927	0.29334	0.88017	0.246159	0.902694	0.826384	0.810864	0.866458	0.436245	1.04439	1.42177	0.318063	0.294488	1.00375	0.83912	0.358087	0.509447	0.784243	1.2935	1.55278	0.257118	0.322722	1.54479	0.917187	0.32496	-0.408064	0.165716	0.0255004	0.94228	-0.642449	1.95761	1.09934	1.33039	1.47714	0.602371	1.82054	1.16837	0.928482	1.62226	1.6112	0.127401	-2.50135
ITM2B	1.19443	2.15815	1.20209	1.24963	0.718886	0.239956	2.34732	1.47814	0.959845	0.489156	-0.0324359	0.797555	0.889703	0.490145	0.538698	0.520775	1.41992	1.70544	1.60565	-0.275781	0.585903	0.156453	1.28236	0.633096	0.260974	0.932027	0.982227	0.922472	-1.03822	1.48898	0.385355	0.369462	0.115387	-1.21789	-0.145952	1.13478	-0.784498	2.8054	2.3247	1.29774	2.13332	0.582156	2.14288	1.30214	0.704913	1.66032	1.55776	0.288876	-0.824126
PROK1	1.38619	-0.806188	1.52125	1.04488	-0.0990291	-1.00402	1.68456	0.686844	1.40695	0.674834	-0.927277	0.228951	1.17831	0.326626	1.22952	0.0745152	1.14022	1.38602	1.36627	1.08749	0.789585	0.58135	0.773669	1.07473	1.44817	-0.896807	0.446893	0.956202	1.43888	1.16126	0.404813	0.154228	-1.397	-0.978154	0.452672	0.793991	0.487213	1.14054	1.77588	0.279292	1.75425	2.01738	1.83772	1.74441	2.16107	-0.182669	1.40707	-1.397	0.22572
SLC40A1	-0.988478	1.15668	-0.0333219	-0.792661	0.459423	1.01381	0.63193	-0.622428	1.09213	-1.76551	-1.76551	0.83658	0.982719	-0.14164	0.219528	0.551751	0.847362	1.36791	-0.0050024	-1.14263	-0.347526	-0.90447	0.841419	0.312571	-1.76551	0.042147	-1.76551	0.0416065	0.55014	1.40196	0.456293	0.382989	0.136469	0.18178	0.41222	0.837313	-0.522206	0.809021	1.25909	0.772702	1.14982	1.23372	1.39215	0.921886	0.980884	1.22423	0.597339	0.453334	0.742227
DTX3L	-0.455374	-0.455374	2.50685	-0.455374	-0.455374	-0.455374	0.725082	-0.455374	2.36172	0.968784	-0.455374	2.25617	-0.455374	-0.455374	-0.455374	-0.455374	2.42121	-0.455374	2.70074	-0.455374	-0.455374	-0.455374	-0.455374	-0.455374	-0.455374	-0.455374	-0.455374	1.48082	-0.455374	2.55548	1.37513	-0.455374	-0.455374	-0.455374	-0.455374	1.25802	-0.455374	-0.455374	2.91739	-0.455374	2.45402	-0.455374	0.945552	-0.455374	-0.455374	-0.455374	-0.455374	2.33106	-0.455374
NRP1	2.71674	-0.673896	-0.673896	0.388744	-0.034718	1.262	1.76328	-0.0500961	1.93985	0.0369858	-0.673896	0.735471	2.07028	0.343692	-0.673896	1.66477	2.30781	0.848982	0.823165	-0.673896	1.37355	-0.673896	1.32721	-0.673896	2.36042	-0.673896	-0.673896	0.176181	-0.673896	2.08632	1.87114	0.988415	0.474307	-0.673896	-0.673896	0.043883	1.10361	1.7091	2.08801	1.35641	1.7498	2.0415	2.03286	2.30624	0.636797	0.742721	0.787058	1.82092	-0.673896
KRT8	-1.03018	0.987667	0.168995	1.0885	-1.03018	0.517657	0.00924999	0.95724	1.27144	-1.03018	0.995651	1.31162	-0.421294	-0.651021	0.819627	0.39132	0.579131	1.70689	1.31247	1.10323	0.655616	-1.03018	-1.03018	-1.03018	1.17023	-1.03018	-0.401421	2.088	1.47975	1.35252	-0.494378	-1.03018	-1.03018	-1.03018	0.553868	-0.0168827	1.10709	-1.03018	1.786	-1.03018	1.63357	2.07903	2.1366	1.4778	2.27116	-1.03018	1.46414	-1.03018	0.753723
GRAMD1B	-0.390072	-0.390072	-0.390072	-0.390072	-0.390072	2.54406	3.36418	3.66755	-0.390072	-0.390072	-0.390072	-0.390072	2.48751	-0.390072	-0.390072	-0.390072	-0.390072	2.10506	-0.390072	-0.390072	-0.390072	0.535713	-0.390072	-0.390072	0.793448	-0.390072	-0.390072	1.09598	2.38536	-0.390072	-0.390072	-0.390072	-0.390072	-0.390072	-0.390072	-0.390072	1.39335	3.31357	1.77176	-0.390072	1.40657	3.43806	-0.390072	-0.390072	3.33023	-0.390072	2.46458	-0.390072	-0.390072
APOBEC3G	-0.529497	1.41884	-0.529497	2.3257	0.196066	2.03027	-0.529497	-0.529497	2.10212	-0.529497	-0.529497	2.09279	-0.529497	1.98635	-0.529497	1.48998	0.858731	-0.529497	2.36739	-0.529497	2.14858	-0.529497	-0.529497	-0.529497	2.43899	-0.529497	-0.529497	2.24698	1.24145	1.95701	1.41836	-0.529497	-0.529497	-0.529497	1.60737	1.74656	-0.529497	-0.529497	2.14057	-0.529497	-0.529497	-0.529497	-0.529497	-0.529497	-0.529497	-0.529497	3.25467	-0.529497	2.47292
SYNPO	1.50714	1.90391	-0.806988	1.50727	0.516762	-0.806988	1.26836	-0.806988	1.689	1.51548	1.66402	1.05312	1.21603	0.228563	-0.806988	-0.806988	-0.806988	2.07238	1.53316	0.071499	-0.806988	-0.806988	-0.806988	-0.806988	-0.806988	-0.806988	-0.806988	1.82005	1.47394	1.71739	-0.34199	-0.806988	0.771894	-0.806988	0.998655	1.17615	-0.251746	-0.806988	1.22111	1.33156	1.23079	2.18012	1.59414	-0.806988	1.67858	1.30848	-0.806988	0.974468	1.66373
CBX6	0.835733	1.32707	0.988583	0.937925	0.353133	0.634693	1.42241	-1.63344	1.07126	0.313451	-0.453123	0.886024	1.0556	0.746368	0.717668	0.733386	1.42453	1.38236	1.0946	0.844076	0.566163	-0.251955	0.528968	1.00814	1.01011	-0.141028	0.584808	1.26677	0.871749	1.22358	0.031643	0.223741	0.420068	0.440229	0.419618	0.968974	0.788757	1.63476	1.23664	0.922512	1.1419	1.02603	1.58764	0.931844	0.614217	0.773382	1.16705	0.539515	0.220646
SELL	-0.275055	-0.275055	-0.275055	-0.275055	-0.275055	-0.275055	-0.275055	-0.275055	1.8163	-0.275055	-0.275055	-0.275055	-0.275055	-0.275055	-0.275055	-0.275055	-0.275055	-0.275055	4.01811	-0.275055	-0.275055	-0.275055	-0.275055	-0.275055	4.50918	-0.275055	-0.275055	1.25882	2.05862	2.80176	-0.275055	-0.275055	-0.275055	-0.275055	-0.275055	-0.275055	-0.275055	-0.275055	4.9842	-0.275055	-0.275055	-0.275055	-0.275055	4.76919	-0.275055	-0.275055	-0.275055	-0.275055	-0.275055
GAS5	2.0222	1.26382	1.21051	1.13449	-0.0211901	0.531123	2.31182	0.603438	1.5245	0.815428	-0.701631	0.208318	0.094217	0.666693	0.139649	-0.035624	1.37878	1.8488	1.10365	0.984567	0.566407	-0.318968	0.208717	0.126763	1.39966	0.37085	1.91914	1.22248	3.05454	1.66524	0.523075	-0.237954	-0.677967	0.299605	-0.355634	1.06288	-0.683101	2.71268	1.48348	1.12013	1.60326	1.72586	2.3205	0.717847	2.10589	1.61949	1.82833	0.312725	-0.224749
TCEAL9	1.27731	1.06516	0.798892	1.2601	0.989932	0.49388	1.31841	1.08681	1.40658	1.04446	-0.248102	0.766748	0.750668	1.18778	0.713306	0.736796	1.37576	1.15372	1.28434	0.855294	0.691071	0.605308	0.912198	0.478736	0.988578	0.661594	0.880296	1.241	0.729417	1.10936	0.923678	0.284732	0.146289	0.407655	0.364281	1.04405	0.146611	1.76674	1.47507	0.774741	1.70617	1.57506	1.64856	1.48901	1.6831	1.06008	1.58685	0.846512	-0.153828
B2M	1.54719	1.16995	0.749426	1.4682	0.10711	0.432713	1.75742	0.848512	1.48547	0.340568	-0.0180746	1.17605	0.849474	0.722404	-0.207529	0.598927	1.17335	1.47769	1.03127	0.883409	0.056276	0.409649	-0.23698	0.507862	0.842031	0.0711601	1.30075	1.53209	1.10248	1.41545	0.787132	-0.233284	-0.239234	-0.0135056	-0.279012	0.649133	0.362391	1.39406	1.59971	0.650384	1.59219	1.39102	1.83078	1.31035	1.7158	1.31717	1.66305	0.100066	0.0462805
PRRX1	-0.4249	-0.4249	-0.4249	-0.4249	-0.4249	-0.4249	-0.4249	-0.4249	2.31643	-0.4249	-0.4249	-0.4249	0.180215	-0.4249	-0.4249	-0.4249	-0.4249	2.59297	1.17457	-0.4249	-0.4249	1.50534	-0.4249	-0.4249	-0.4249	-0.4249	-0.4249	-0.4249	2.32774	-0.4249	2.26621	1.83175	1.06453	-0.4249	-0.4249	-0.4249	1.45995	-0.4249	2.82919	3.06173	2.82334	-0.4249	3.7212	-0.4249	-0.4249	-0.4249	-0.4249	-0.4249	-0.4249
RNF5	1.44702	0.468915	1.20009	1.39075	1.31012	1.16018	1.12694	1.25649	1.0525	1.47146	-1.26103	1.08496	0.887299	1.06127	0.982817	1.00362	1.20067	1.3907	1.409	0.590508	0.703476	0.34787	0.0223824	0.705586	1.48266	-0.41728	0.964467	0.847655	0.906666	1.04547	0.687843	0.48043	-1.26103	0.660222	-0.0395949	0.466817	-1.26103	1.63951	1.28119	-1.26103	1.41846	1.18735	1.32497	1.0467	0.624179	1.41624	1.36814	-1.26103	-0.424922
RCN1	0.616721	1.27103	1.1825	1.4929	0.53857	0.865456	1.00529	0.888652	1.51466	0.0115743	-0.602682	1.21848	0.940056	1.47341	1.22707	1.33509	1.83624	1.52484	1.22416	-1.08855	0.742923	0.506189	0.733996	0.964538	0.945186	1.02473	1.65222	0.77835	0.426745	1.53361	0.877849	0.598033	0.308334	0.691551	-1.08855	0.736143	0.673798	1.62245	1.3696	0.851788	1.52666	1.32415	1.71498	1.59076	1.31774	1.39765	0.883181	0.957192	-1.08855
DPYSL3	0.751846	0.300098	0.379125	1.43182	0.6819	0.904505	1.51985	1.16223	1.59487	-1.41625	1.24438	0.461124	0.749905	0.955248	0.888349	0.662617	1.32112	0.949566	0.881028	-1.44504	-0.0590477	0.288676	0.761286	0.729758	0.973817	-1.4309	-0.557349	0.704387	0.792559	1.21452	0.2257	-0.00450988	-1.30874	0.539515	-1.60324	0.189851	0.572169	-0.0153074	1.24035	0.730319	1.3388	0.846119	1.52197	0.481795	1.50868	1.40101	0.434347	-1.06933	0.574751
CDO1	-0.510988	-0.510988	2.18197	-0.510988	-0.510988	-0.510988	-0.510988	-0.510988	-0.510988	-0.510988	-0.510988	1.45172	0.612848	-0.510988	1.96241	-0.510988	1.28843	2.76941	1.2244	-0.510988	-0.510988	1.9357	-0.510988	-0.510988	-0.510988	-0.510988	-0.510988	1.63249	0.463089	0.740925	1.13304	-0.510988	1.29115	-0.510988	-0.510988	1.8286	-0.510988	-0.510988	2.21026	-0.510988	2.76645	-0.510988	-0.510988	-0.510988	-0.510988	0.593879	2.59897	2.38859	-0.510988
IFITM3	0.964898	1.4001	0.665436	1.39838	0.237927	0.850937	1.47801	0.6498	1.04181	0.779293	0.0384338	0.828465	0.656825	0.976079	0.518278	0.683467	1.33376	1.56578	0.767085	0.623835	0.137122	0.609969	0.483746	-0.207165	1.37295	0.82011	1.42346	1.13461	2.19768	1.37998	0.322227	-0.250498	-0.70079	-0.352913	-0.777467	0.305382	-0.276615	1.58408	0.561881	1.16266	1.99911	2.02251	2.10364	1.62159	2.14717	0.821404	1.2792	0.554491	-0.213257
C1R	1.03825	1.09445	1.38784	1.30461	1.11468	1.01116	1.26557	1.01178	0.865857	0.44669	0.663726	0.904814	1.07679	0.608971	0.634839	0.436288	1.18472	1.35012	0.562691	0.421616	0.742149	1.00602	0.90589	0.16981	1.04147	0.44389	1.39121	0.465873	0.534026	1.41603	0.721701	-0.00123926	-0.445593	0.826546	-0.406289	0.368039	0.134879	1.5336	0.927583	1.08973	1.36723	1.61231	1.60881	1.21331	1.34278	1.32204	1.10201	0.173031	0.42926
HPCAL4	-0.337096	-0.337096	-0.337096	-0.337096	-0.337096	-0.337096	3.37472	-0.337096	3.2507	-0.337096	-0.337096	2.55632	-0.337096	-0.337096	-0.337096	-0.337096	-0.337096	2.47262	2.89704	2.73014	-0.337096	-0.337096	-0.337096	-0.337096	-0.337096	-0.337096	-0.337096	1.33092	2.4814	2.51385	-0.337096	-0.337096	-0.337096	-0.337096	-0.337096	-0.337096	-0.337096	-0.337096	2.96806	-0.337096	-0.337096	4.1825	3.75452	-0.337096	-0.337096	-0.337096	-0.337096	-0.337096	-0.337096
SDC4	-0.883003	1.48846	0.74643	1.74598	-0.122749	-0.883003	1.47387	1.27438	1.59727	-0.883003	-0.350708	1.30772	0.477517	1.0815	-0.386037	-0.883003	0.206457	1.9294	1.85968	-0.883003	-0.883003	-0.883003	-0.883003	1.57756	0.830536	-0.883003	0.79918	1.68747	1.54307	1.40561	-0.883003	0.504622	-0.883003	-0.883003	0.741478	1.04819	1.37284	0.495582	1.96707	1.37111	1.46128	1.39632	1.86149	-0.883003	2.05585	-0.883003	1.71361	-0.883003	1.18091
TTYH1	-0.307118	-0.307118	-0.307118	-0.307118	-0.307118	-0.307118	-0.307118	-0.307118	2.74067	-0.307118	-0.307118	-0.307118	-0.307118	-0.307118	-0.307118	-0.307118	-0.307118	3.36031	-0.307118	-0.307118	2.96306	-0.307118	-0.307118	-0.307118	-0.307118	-0.307118	-0.307118	4.14291	4.7184	2.44927	-0.307118	-0.307118	-0.307118	-0.307118	-0.307118	-0.307118	-0.307118	-0.307118	2.65961	-0.307118	-0.307118	4.40078	-0.307118	-0.307118	-0.307118	-0.307118	-0.307118	-0.307118	-0.307118
APOBEC3F	-0.401194	-0.401194	-0.401194	-0.401194	-0.401194	-0.401194	2.36435	-0.401194	1.79086	-0.401194	-0.401194	-0.401194	-0.401194	1.54393	-0.401194	2.07126	3.70346	3.16525	-0.401194	-0.401194	0.575436	2.9941	-0.401194	-0.401194	-0.401194	-0.401194	-0.401194	2.37842	2.52576	-0.401194	0.921121	2.32113	-0.401194	3.17468	-0.401194	-0.401194	-0.401194	-0.401194	1.77919	-0.401194	2.15116	-0.401194	-0.401194	-0.401194	-0.401194	-0.401194	-0.401194	0.612117	-0.401194
REG3G	-0.285373	-0.285373	-0.285373	-0.285373	-0.285373	-0.285373	-0.285373	-0.285373	3.56089	-0.285373	-0.285373	-0.285373	-0.285373	-0.285373	-0.285373	-0.285373	-0.285373	-0.285373	-0.285373	-0.285373	-0.285373	-0.285373	-0.285373	-0.285373	-0.285373	-0.285373	-0.285373	3.02381	3.87338	-0.285373	-0.285373	-0.285373	-0.285373	-0.285373	-0.285373	-0.285373	-0.285373	-0.285373	-0.285373	-0.285373	2.49225	4.85366	-0.285373	4.97147	3.86577	-0.285373	-0.285373	-0.285373	-0.285373
LIX1L	0.0391733	1.03363	0.308183	-1.55807	1.1533	-1.55807	1.14966	-0.954864	0.956873	1.01849	0.524555	0.964544	1.31152	0.483263	0.463509	0.915218	1.11172	1.34983	0.621966	0.951128	-1.55807	0.427303	0.0962777	-1.55807	0.474655	1.05752	1.10763	0.723514	0.712622	1.16928	0.947963	-0.0862	0.4737	0.676787	0.498168	0.710747	0.288276	1.6986	0.655144	0.614533	0.742213	-1.55807	1.39078	0.576218	-0.619688	-0.188216	1.10042	-1.55807	0.713667
UTRN	1.84379	0.661002	0.926198	-0.862575	1.33325	-0.862575	0.53459	1.08268	1.70949	1.34871	-0.862575	0.676687	1.40582	0.738407	1.49133	-0.862575	-0.862575	1.7026	1.45596	0.481669	0.832672	0.289448	0.242761	1.58336	-0.862575	-0.862575	0.90663	1.20231	1.15799	1.50147	1.82291	0.826565	-0.862575	-0.862575	0.536388	1.29173	-0.862575	1.36779	1.79844	0.420562	1.32454	2.28388	1.83799	-0.862575	-0.862575	1.96826	0.409246	-0.862575	-0.862575
WNT6	-0.552785	1.47046	-0.552785	-0.552785	-0.0159805	-0.093966	2.47359	0.591702	2.07305	-0.552785	-0.552785	1.24921	-0.552785	-0.0853366	-0.552785	-0.552785	-0.552785	1.61584	2.44239	-0.552785	-0.552785	-0.552785	-0.552785	2.08285	-0.552785	-0.552785	-0.552785	2.81768	2.81818	1.9122	-0.552785	-0.552785	-0.552785	-0.552785	1.23307	2.05423	1.51741	-0.552785	2.67204	-0.552785	1.85423	2.44348	2.0878	-0.552785	2.60175	-0.552785	-0.552785	-0.552785	1.875
FKBP7	-0.944043	1.9937	0.68868	1.21681	-0.944043	0.905505	1.68148	0.148767	0.768394	-0.944043	-0.944043	0.923163	1.1182	1.33439	0.477407	1.37996	1.58732	1.69604	0.90497	1.40894	0.845581	1.17445	1.19956	-0.944043	1.77251	-0.944043	0.776892	1.06451	0.134472	1.61447	0.86364	0.560439	0.190859	1.13393	0.338318	1.24601	0.761729	2.59333	0.916128	0.475614	1.67701	-0.944043	0.747073	0.802376	-0.944043	1.68893	1.33158	0.917706	-0.944043
CALD1	1.4936	1.20884	0.929641	1.09619	0.995435	0.398504	1.3734	0.127887	1.13044	0.826352	1.01261	0.95407	0.824195	0.901175	0.899084	0.980258	1.44087	1.4737	0.649091	0.979273	0.686975	0.744903	0.901753	0.64404	1.12791	0.376396	0.88329	0.406214	1.29636	1.33872	0.886267	0.158786	-0.233283	0.87465	0.39183	0.710231	-0.52773	1.67183	1.13631	0.911576	1.3172	1.03917	2.08796	0.737108	1.13756	1.2971	1.27119	0.893556	0.453599
BEX5	-0.507694	-0.507694	-0.507694	2.28128	-0.507694	-0.507694	3.19516	-0.507694	2.4805	-0.507694	-0.507694	-0.507694	-0.507694	-0.507694	-0.507694	-0.507694	-0.507694	1.50994	1.23581	-0.507694	-0.507694	0.822192	-0.507694	-0.507694	-0.507694	-0.507694	-0.507694	1.66155	3.14718	2.40754	1.45361	-0.507694	-0.507694	-0.507694	-0.507694	1.22291	-0.507694	-0.507694	2.62771	-0.507694	0.981356	2.17421	2.69994	-0.507694	-0.507694	2.24189	1.5581	-0.507694	0.892291
PHLDA1	-1.03451	-0.0465137	0.718631	0.695675	-1.03451	0.865037	-0.30648	-1.03451	0.790091	0.650464	1.21724	0.475021	-0.631748	0.700935	-1.03451	0.926431	0.332461	1.26139	0.258043	-1.03451	-0.00654138	0.167787	-1.03451	1.06437	-1.03451	0.705576	2.09384	-0.300557	1.11464	1.53423	1.38214	-1.03451	0.615152	0.24343	0.960947	1.01098	0.290282	2.07206	1.57004	0.977493	1.60567	1.9688	1.78181	-1.03451	2.16113	-1.03451	-0.242798	1.04476	0.760192
TCEAL6	0.383266	-0.580052	-0.580052	1.82053	-0.580052	1.19058	2.45512	1.49685	2.3718	-0.580052	-0.580052	1.08216	-0.580052	-0.580052	-0.580052	-0.580052	-0.580052	2.26765	1.97871	-0.580052	-0.580052	-0.580052	-0.580052	-0.580052	-0.580052	-0.580052	1.60471	2.46509	2.76708	0.033145	-0.580052	0.265207	-0.580052	-0.580052	-0.580052	1.10823	-0.580052	-0.580052	2.9999	-0.580052	1.25334	1.14755	0.945273	2.8263	2.67392	1.20008	2.11785	-0.580052	2.21852
MIR503HG	-0.534227	-0.534227	-0.534227	-0.534227	-0.534227	0.177614	1.25733	-0.534227	3.00815	-0.534227	1.29287	1.30214	1.85649	1.82953	-0.534227	2.635	3.0295	1.32498	2.76906	1.7494	-0.534227	0.307187	1.93389	1.74425	2.79583	-0.534227	2.86959	0.573401	2.11935	0.169731	1.58431	-0.534227	0.78068	-0.534227	-0.534227	-0.534227	1.23529	-0.534227	2.12446	1.91607	-0.534227	-0.534227	-0.534227	-0.534227	1.93715	-0.534227	1.56833	-0.534227	-0.534227
APOL1	-0.413898	2.61866	-0.413898	2.56507	-0.413898	-0.413898	-0.413898	-0.413898	2.38703	-0.413898	-0.413898	0.292726	-0.413898	-0.413898	-0.413898	2.82023	-0.413898	-0.413898	1.20423	-0.413898	-0.413898	-0.413898	-0.413898	-0.413898	-0.413898	-0.413898	2.90713	1.98696	1.29373	3.07231	1.6324	1.02866	-0.413898	-0.413898	-0.413898	-0.413898	1.71143	-0.413898	3.4376	3.72511	-0.413898	-0.413898	2.74304	-0.413898	1.6373	-0.413898	-0.413898	-0.413898	-0.413898
PLAAT4	1.13577	-0.95025	0.572744	1.07734	0.467571	0.485381	2.0679	1.17107	1.29239	-0.95025	-0.95025	1.20401	0.931584	1.13621	-0.95025	0.561536	1.52733	1.7744	1.30868	-0.298021	1.0868	0.384669	0.57476	0.857559	2.04596	0.900306	1.67466	0.970602	2.00327	1.86837	0.970697	-0.95025	-0.95025	-0.95025	-0.95025	0.363869	-0.95025	-0.95025	0.896002	0.42663	1.17597	1.53739	1.66662	1.3648	1.51109	1.03201	1.64917	0.625297	0.678206
SDC2	-0.414507	0.696122	0.336467	1.70407	0.282149	0.426892	-0.556137	-0.329712	0.958926	-2.18669	-0.142503	0.327763	1.5777	-0.192261	-0.166203	0.220791	1.5748	1.25391	0.944841	-2.7867	-0.157943	0.541638	0.375104	0.274643	0.462111	0.427647	-0.495917	-0.429809	-1.12594	0.874423	0.923264	0.04221	-0.364618	-0.805824	-0.30167	0.328428	-0.665914	1.26848	1.39842	-0.537695	1.21507	-0.443775	1.52431	1.73232	1.25192	0.968178	-0.420771	-1.45825	0.107215
SELENOP	0.871907	0.979109	1.46848	1.52583	0.810956	1.06649	-0.579905	1.07339	0.712123	0.446088	0.325434	1.1165	1.2124	0.714144	0.548458	0.748778	1.30575	1.40546	0.773673	0.390661	1.07817	0.93163	1.15429	0.466026	1.17768	0.531101	0.752217	-0.403359	-0.0182653	1.41933	1.17212	0.658364	0.0499215	1.01022	0.523968	1.12569	0.499413	1.91551	1.6229	0.92016	1.50936	0.0133609	1.61831	0.967977	-0.90178	1.82536	0.825561	0.289256	0.569807
ZNF300P1	3.033	-0.443704	-0.443704	2.52809	-0.443704	-0.443704	-0.443704	-0.443704	2.02064	-0.443704	-0.443704	1.47411	2.71104	0.348004	-0.443704	-0.443704	0.823991	2.61656	2.13524	1.23108	-0.443704	0.894092	1.30597	-0.443704	-0.443704	0.545387	-0.443704	-0.443704	1.39594	2.33874	1.41618	-0.443704	2.31877	-0.443704	-0.443704	1.29719	-0.443704	3.44137	2.95704	-0.443704	3.54358	-0.443704	-0.443704	-0.443704	-0.443704	-0.443704	-0.443704	-0.443704	-0.443704
IFI16	1.36267	1.3111	-1.02988	0.329834	0.206897	1.23671	1.64573	-1.02988	0.991137	-1.02988	0.667604	0.911709	0.61166	0.109366	0.553716	-0.404355	1.68803	1.88667	1.53701	-1.02988	0.206209	-1.02988	-0.279277	0.4324	-1.02988	-1.02988	1.38383	0.691987	1.17378	1.57255	0.645779	0.0870521	-1.02988	-1.02988	0.460967	1.06711	1.07845	-1.02988	1.67966	1.19648	2.1483	1.6038	2.25772	2.38442	1.54055	0.855792	0.635215	-1.02988	-1.02988
POGLUT1	-0.875234	-0.875234	1.98046	0.902732	0.969054	1.16148	1.42558	-0.875234	1.20298	-0.875234	-0.875234	1.6407	0.810988	1.24621	0.54386	0.718791	1.54941	1.43829	0.758376	1.14599	1.72903	-0.875234	0.962639	-0.875234	1.04317	-0.875234	-0.875234	1.11724	1.26578	0.795609	1.12126	-0.875234	0.966585	-0.331367	1.12915	0.604538	1.30336	2.27046	0.838113	-0.102545	1.06591	-0.875234	1.90932	-0.875234	-0.875234	-0.875234	-0.875234	0.458948	-0.875234
PTGDS	1.24426	0.372051	1.15263	0.952604	0.704565	0.592979	1.77626	1.48796	1.82658	0.522112	0.403635	1.18807	-0.625739	-0.535146	1.1073	-0.0307832	0.548366	1.10047	2.10853	-1.28003	0.668758	0.779554	0.357517	1.73765	1.71672	-1.28003	0.788095	1.38637	2.24271	0.925245	-0.47138	0.0660966	-0.541317	-0.647569	0.819873	1.0012	0.53506	-1.28003	1.88197	-1.28003	1.00263	1.52664	0.626103	0.218635	1.58859	1.3783	1.35798	-1.28003	0.848061
CRYL1	-0.848893	-0.112494	1.25891	1.77893	0.983436	1.36596	0.625998	-0.848893	1.47106	1.30539	-0.848893	1.28259	1.15261	1.08369	-0.848893	1.43649	-0.848893	1.44103	1.75924	-0.848893	1.30768	-0.848893	-0.848893	-0.848893	0.500004	-0.848893	1.72587	1.50687	1.12027	1.34643	-0.848893	0.77189	0.436187	-0.848893	0.781109	1.11068	-0.848893	-0.848893	1.71538	-0.848893	1.58965	-0.848893	0.0483205	-0.848893	1.42726	1.83535	2.10987	0.50449	0.67416
CMBL	1.77251	-0.947328	-0.947328	1.36555	1.29586	0.475069	0.500308	-0.398374	1.25343	-0.321741	-0.947328	-0.947328	-0.947328	0.985852	1.22068	0.74919	1.14637	1.62509	-0.30915	-0.0835751	0.353495	-0.947328	1.15335	-0.947328	2.11794	0.751466	-0.947328	0.8874	0.321835	1.39365	0.999103	0.670969	0.880924	0.945298	1.17853	0.948037	0.521276	2.14752	1.21845	-0.947328	-0.947328	-0.947328	0.665106	-0.947328	1.57566	1.56897	0.665901	1.39945	1.40232
AP000866.1	2.92748	-0.462848	-0.462848	1.45703	1.38701	-0.462848	-0.462848	-0.462848	-0.462848	-0.462848	-0.462848	2.88704	-0.462848	-0.462848	-0.462848	2.66139	2.4428	-0.462848	-0.462848	-0.462848	-0.462848	-0.462848	-0.462848	-0.462848	-0.462848	-0.462848	-0.462848	-0.462848	-0.462848	2.25106	-0.462848	1.0774	-0.462848	-0.462848	1.54405	-0.462848	-0.462848	-0.462848	0.933542	-0.462848	-0.462848	-0.462848	-0.462848	-0.462848	-0.462848	1.60217	-0.462848	1.10912	-0.462848
TM4SF1	1.62763	-0.745271	-0.745271	1.27783	-0.745271	-0.745271	1.7867	-0.745271	1.55897	1.13446	-0.745271	0.77617	1.50015	1.47737	-0.745271	-0.745271	1.95425	1.01234	0.949591	1.09883	0.901324	-0.745271	0.28933	1.71786	1.64671	-0.745271	1.96793	1.39438	0.172488	1.36293	1.7244	-0.745271	-0.745271	-0.745271	-0.745271	0.656791	-0.745271	2.50072	1.09795	-0.280732	1.8085	-0.745271	1.94304	2.00961	2.00334	1.54196	-0.745271	-0.745271	-0.745271
MFAP2	0.85928	1.12838	1.53466	1.63318	-1.14801	0.642738	1.01826	0.273293	1.71628	-1.14801	-0.368549	0.478854	0.992609	0.771319	-1.14801	0.705273	1.66613	0.744556	1.12634	0.882705	0.403212	0.588761	1.22533	-1.14801	-1.14801	-1.14801	1.14489	1.63998	1.60411	1.26239	0.722398	-1.14801	0.333833	-1.14801	-1.14801	0.646883	-1.14801	1.65149	1.09555	0.969481	1.327	1.51498	1.59846	1.19423	-1.14801	-1.14801	1.36758	0.760943	-1.14801
SLC44A1	-1.16816	0.653857	-1.16816	1.86728	-1.16816	0.195584	-0.314678	-1.16816	1.72611	-1.16816	1.57566	-0.0427569	1.34494	1.41717	-0.551075	-0.673237	1.36001	-1.16816	0.77824	0.287999	0.705458	-0.216199	-1.16816	-0.377956	-1.16816	-1.16816	-0.233922	0.384632	0.89318	1.0866	-0.642299	0.75158	0.107037	0.153014	0.795787	0.715249	-0.246967	-1.16816	1.25177	-1.16816	-1.16816	1.3381	2.20111	1.6614	-1.16816	0.978326	1.20123	0.846459	-1.16816
WWTR1	1.07963	2.13682	1.57355	0.948153	-0.976094	-0.286548	1.81071	-0.976094	1.30142	0.73685	-0.0148342	1.04084	0.924924	-0.00299205	1.5031	1.27936	1.53646	1.65169	1.18398	1.00894	1.5244	-0.976094	0.847919	-0.976094	1.99302	0.885524	1.59759	0.108204	0.603479	1.77696	1.25349	0.641633	-0.976094	-0.976094	-0.976094	0.835353	-0.21064	0.955556	1.20488	-0.280327	1.28934	1.28908	1.43711	-0.140233	1.47541	0.597689	1.84384	1.06231	-0.976094
CCDC68	-0.458498	2.81361	1.80723	2.75579	-0.458498	-0.458498	-0.458498	-0.458498	-0.458498	-0.458498	-0.458498	2.43831	0.756207	-0.458498	0.570977	-0.458498	2.21498	1.18119	0.766055	-0.458498	2.73107	-0.458498	-0.458498	-0.458498	-0.458498	-0.458498	1.10008	-0.458498	-0.458498	-0.458498	0.86966	0.362777	0.470721	-0.458498	-0.458498	-0.458498	0.589047	4.92034	1.15906	-0.458498	-0.458498	-0.458498	-0.458498	-0.458498	-0.458498	-0.458498	-0.458498	-0.458498	-0.458498
PARM1	0.263107	0.197015	-1.67861	1.13656	0.111754	-0.508725	-0.311984	0.499687	0.799568	0.509828	0.986938	1.0636	-0.942885	-2.32226	-0.0823084	0.37392	0.0793658	0.584255	1.00993	1.23366	-0.0255585	0.308743	-2.32226	-1.49648	0.772362	-0.902549	0.532852	0.833966	0.825834	0.138578	0.0530417	0.545297	0.629161	0.387265	0.347552	0.846708	1.03357	-2.32226	1.22184	-2.32226	0.581148	0.727569	-2.32226	-1.59153	0.181658	1.19307	0.640912	0.24132	-0.688568
GBP1	0.809017	1.66297	1.94573	1.98923	-0.507314	-0.507314	2.42562	-0.507314	2.51328	-0.507314	-0.507314	-0.507314	-0.507314	2.30398	-0.507314	-0.507314	2.5754	2.14479	-0.507314	-0.507314	0.826165	1.89319	-0.507314	-0.507314	-0.507314	-0.507314	-0.507314	1.90726	-0.507314	2.51751	-0.507314	-0.507314	-0.507314	0.828238	1.30177	0.64106	-0.507314	2.91315	1.48892	2.11984	1.47585	2.93533	-0.507314	-0.507314	2.73989	1.8086	-0.507314	-0.507314	-0.507314
NID1	1.05551	1.60198	1.29068	0.871447	1.20986	0.12853	-0.129741	1.19037	1.76745	0.785008	-0.0383872	1.47669	1.63356	1.53404	0.20357	1.56832	1.77071	1.51311	1.44685	-0.857064	1.10353	1.70459	1.25577	-0.857064	-0.857064	-0.857064	1.60698	0.569075	1.1201	1.14967	1.05075	0.354691	0.379245	-0.857064	-0.857064	0.198625	-0.321964	1.81794	0.985171	1.19166	1.96647	-0.0200519	1.81583	1.8431	-0.857064	2.09621	1.32497	-0.857064	1.44597
PLP2	0.733741	1.10223	1.04734	0.788759	-1.5871	0.602141	1.12747	1.54129	1.338	0.749532	-1.5871	0.639742	0.590153	0.0284988	0.90756	0.607078	0.734634	0.791636	1.14064	-1.5871	0.730922	0.412133	0.385665	0.956148	0.934289	1.03279	0.432941	1.1103	1.54182	1.03596	0.0990655	0.170476	-1.09703	-1.5871	0.458232	0.159225	0.490107	0.882598	1.22192	0.540793	1.24375	0.98071	1.919	1.22468	1.04803	1.14283	1.29307	0.376027	0.576544
SNHG5	0.62205	0.578036	1.18928	1.18998	0.851464	0.415924	1.75142	0.761035	1.61021	0.627811	-0.394706	0.556633	0.207147	0.670629	0.225787	0.822405	1.21027	1.31779	0.859079	0.733836	0.570143	-0.148294	-0.691879	-0.0440614	1.13629	0.417153	0.54299	0.584337	1.36252	1.28391	0.253807	0.354612	0.00953465	-0.653381	0.383288	0.523259	-0.384486	2.50011	1.49292	0.811568	1.5149	0.854689	2.15613	1.02378	1.54194	1.90308	1.86611	-0.671985	0.363048
RPL34	2.18694	1.08501	0.910265	0.97499	-0.221332	-0.194234	2.12759	0.790491	1.53644	0.645984	0.824517	0.792288	0.251233	0.778829	0.0144981	0.340185	0.903437	1.39302	0.632966	1.2306	0.518291	0.157908	0.246541	0.653986	1.6309	-0.00674402	0.929783	0.659014	3.25151	0.900859	0.252427	-0.618294	-0.521911	0.466092	-0.253617	0.39046	-0.647276	3.2156	1.24566	0.587126	1.4754	1.80231	1.69798	0.77418	1.98565	1.6308	2.07482	-0.276245	0.415407
DPYD	-0.230892	0.70788	-1.14925	-0.510125	1.42429	0.30859	0.338486	-1.14925	1.40406	-1.14925	1.64496	0.946489	0.974779	1.32687	-0.489588	1.12968	0.399268	1.26702	0.98328	-0.0872353	1.03541	-1.14925	0.495152	-1.14925	-1.14925	1.40437	-1.14925	0.639728	-1.14925	0.901149	0.660645	0.733072	-0.256843	0.263082	0.415742	-0.372605	0.916712	0.284558	0.0975675	-1.14925	1.67119	2.13792	0.702	-1.14925	1.20874	1.68946	-1.14925	-1.14925	1.09988
NPR3	0.699802	-0.417047	-0.417047	-0.417047	-0.417047	-0.417047	3.16839	-0.417047	2.66133	-0.417047	-0.417047	3.38207	-0.417047	0.315361	-0.417047	-0.417047	1.00531	2.13764	3.28437	-0.417047	-0.417047	-0.417047	-0.417047	1.64573	-0.417047	-0.417047	-0.417047	2.66695	1.87391	2.03279	-0.417047	-0.417047	-0.417047	-0.417047	-0.417047	-0.417047	2.45694	-0.417047	1.76932	-0.417047	2.77222	-0.417047	-0.417047	2.9606	3.28683	-0.417047	-0.417047	-0.417047	-0.417047
SMOC1	1.59706	-0.702634	-0.702634	-0.702634	1.51052	-0.702634	-0.702634	1.0291	1.92731	-0.702634	-0.702634	1.1264	-0.0519017	-0.702634	2.02172	-0.702634	1.68482	0.175767	0.412766	-0.702634	-0.702634	-0.702634	1.73721	-0.702634	-0.702634	-0.702634	-0.702634	1.22705	1.61939	1.34406	0.172631	1.36068	-0.702634	-0.702634	-0.702634	-0.702634	-0.702634	-0.702634	1.36779	-0.702634	-0.702634	2.0883	0.513078	0.374297	2.07798	-0.702634	1.71381	-0.702634	1.68999
MAOB	-1.19456	0.536663	0.873802	1.44064	-0.718159	-0.0783578	1.33477	1.00434	1.35491	0.801065	-1.19456	1.22512	1.28597	0.912714	1.35725	0.804215	1.50637	1.3792	0.796252	0.660975	1.099	0.732019	0.881605	-1.19456	1.63816	1.24506	1.02643	0.824427	0.660728	1.39179	-0.608321	0.505483	0.371487	0.850033	0.309093	1.04396	0.694481	1.35594	1.46217	0.96266	1.18725	0.0546057	1.1062	1.18153	1.27073	1.43707	0.826488	1.02559	-1.19456
MYL9	1.54517	0.425793	0.890355	1.19418	0.568899	0.446377	1.75974	0.649428	1.07163	0.828732	-0.183592	0.866379	0.31423	0.845342	1.58252	0.657145	1.41984	1.58198	0.938356	0.999606	0.935829	0.279399	0.312107	0.249122	1.44467	1.29521	1.18455	1.21332	1.57648	1.47012	0.205724	-0.0210797	-0.977349	0.262258	0.226403	0.314259	-0.324188	1.77614	1.45531	0.357761	0.910955	0.251903	2.14232	0.379015	0.523381	1.41044	1.76533	0.630068	-0.120519
SLC16A9	1.20624	-0.474352	-0.474352	1.2472	0.859274	-0.474352	-0.474352	-0.474352	2.08486	-0.474352	-0.474352	2.15227	1.39037	-0.474352	-0.474352	1.6286	3.0779	2.23885	-0.474352	-0.474352	-0.474352	-0.474352	2.04589	-0.474352	2.70906	-0.474352	0.845471	1.36913	1.58789	1.30648	-0.474352	0.221113	-0.474352	-0.474352	-0.474352	-0.474352	-0.474352	2.48694	1.90152	0.972528	3.63795	-0.474352	-0.474352	-0.474352	2.23781	3.43897	1.83306	-0.474352	-0.474352
CARMN	2.3718	-0.549824	-0.549824	-0.549824	-0.549824	-0.549824	-0.549824	-0.549824	-0.549824	-0.549824	0.872083	2.00194	-0.0345348	2.30589	1.78941	0.843094	2.16328	0.898751	1.10387	-0.549824	-0.549824	0.163504	0.808944	-0.549824	-0.549824	-0.549824	2.63861	1.21412	1.37335	2.231	1.18989	-0.549824	-0.549824	-0.549824	1.28607	-0.549824	0.135446	3.01061	1.01009	0.84505	2.39516	0.522087	2.63886	1.7117	-0.549824	1.42414	2.99633	-0.549824	-0.549824
LRRN2	-0.281348	4.73902	-0.281348	-0.281348	-0.281348	1.82156	1.2705	-0.281348	1.85172	-0.281348	-0.281348	-0.281348	-0.281348	-0.281348	-0.281348	-0.281348	-0.281348	0.954454	-0.281348	-0.281348	-0.281348	-0.281348	-0.281348	-0.281348	-0.281348	-0.281348	-0.281348	4.03196	4.29975	-0.281348	-0.281348	-0.281348	-0.281348	-0.281348	-0.281348	3.62044	-0.281348	-0.281348	3.75182	-0.281348	-0.281348	-0.281348	-0.281348	-0.281348	5.21507	-0.281348	-0.281348	0.827933	-0.281348
BTN3A2	-0.495907	1.77535	-0.495907	1.25316	-0.495907	-0.495907	1.99426	-0.495907	1.60186	2.72692	-0.495907	1.51484	-0.495907	1.53216	2.32049	1.40708	2.23207	-0.495907	2.4553	-0.495907	-0.495907	-0.495907	-0.495907	-0.495907	1.4068	-0.495907	2.4779	1.7808	1.7054	2.24848	2.29015	1.40208	-0.495907	1.90631	-0.495907	-0.495907	1.64311	-0.495907	2.23721	-0.495907	-0.495907	-0.495907	-0.495907	-0.495907	2.4064	2.52835	-0.495907	-0.495907	-0.495907
ALCAM	-0.583478	-0.583478	-0.583478	1.22114	-0.583478	-0.583478	-0.583478	-0.583478	1.70146	-0.583478	-0.583478	-0.583478	2.62052	0.423341	-0.583478	1.7479	0.723712	1.6535	1.74206	0.84042	-0.583478	2.82936	1.15622	-0.583478	2.19336	-0.583478	-0.583478	1.58784	0.73609	0.620645	2.04786	1.98104	-0.583478	-0.583478	-0.583478	1.2154	-0.583478	-0.583478	2.26108	-0.583478	2.09878	-0.583478	-0.583478	-0.583478	-0.583478	2.4801	1.1833	-0.583478	-0.583478
SYNPO2	-1.00746	0.944444	1.04586	1.26398	1.08636	1.1688	1.33462	1.16042	0.682376	0.848236	-1.00746	1.25847	1.08236	1.50927	1.58884	0.761532	1.82758	0.916734	0.755243	-1.00746	0.377786	-1.00746	1.0812	0.679155	1.58933	-0.385552	0.981237	0.301518	-1.00746	1.55333	1.01543	0.479255	-0.104903	-1.00746	-0.150356	1.25081	0.624706	-1.00746	1.41718	1.65763	1.56464	0.599678	1.34602	-1.00746	-0.139552	1.37498	1.97982	0.77268	1.01012
MT1E	-0.570814	2.23081	0.823436	1.30296	0.880739	-0.570814	2.2733	1.55013	2.1256	1.01247	-0.570814	-0.570814	-0.570814	-0.570814	-0.570814	-0.570814	1.11149	2.3823	-0.570814	-0.570814	0.333315	0.434231	-0.570814	-0.570814	-0.570814	-0.570814	4.50982	1.26071	2.6678	0.97885	-0.570814	-0.570814	-0.570814	-0.570814	0.227272	-0.570814	-0.570814	-0.570814	-0.570814	-0.570814	-0.570814	2.51313	-0.570814	-0.570814	-0.570814	0.796831	2.41377	-0.570814	-0.570814
SLC37A3	1.62746	-0.696199	1.82468	1.9785	-0.037801	-0.696199	1.98089	-0.696199	-0.696199	-0.696199	-0.696199	1.2497	1.02303	-0.696199	-0.696199	1.2896	1.57745	1.51996	0.845879	-0.696199	0.963984	1.59174	1.45775	-0.696199	-0.696199	-0.696199	-0.696199	0.884051	1.35207	1.54001	1.18767	-0.696199	-0.696199	-0.696199	-0.696199	1.41137	0.800526	2.56448	0.857093	-0.696199	-0.696199	-0.696199	-0.696199	-0.696199	2.56853	2.14019	-0.696199	-0.696199	1.7665
TPM2	1.43862	0.751639	1.3932	1.29235	0.555863	0.67181	1.12506	0.155727	1.39724	0.951289	0.538095	0.879521	0.437889	1.20466	0.856833	0.745772	1.46922	1.52357	0.606758	1.04024	0.57561	0.416523	0.815871	0.574301	1.11036	1.00813	1.05097	0.589369	1.21034	1.35237	0.60507	-0.26641	0.0864846	0.0198919	-0.0551319	0.693747	-0.244198	1.72956	0.967592	0.761899	1.18294	1.21738	2.00909	0.6909	0.473101	1.08999	1.43393	0.436614	-0.0613075
TRIM4	-0.800914	0.929867	0.852776	1.57331	1.61156	1.22857	-0.800914	1.28693	0.363699	-0.800914	-0.800914	0.700206	-0.800914	1.73597	1.5631	0.788092	1.03439	1.79634	1.32423	-0.800914	0.917864	-0.800914	1.11407	-0.103606	-0.800914	-0.800914	0.754213	1.18106	0.48724	1.76172	1.34493	0.784227	-0.800914	1.47692	0.822906	1.59911	1.21094	2.34991	1.931	0.481962	2.10074	1.34796	1.4991	0.828518	1.19302	1.96213	1.21847	0.667066	-0.800914
SPATA13	0.721428	-0.580661	1.0108	1.93306	-0.580661	-0.580661	0.942639	0.432205	1.33874	-0.580661	-0.580661	-0.580661	2.56061	-0.580661	-0.580661	-0.580661	0.406709	1.89337	0.948451	-0.580661	-0.580661	-0.580661	1.92105	-0.580661	-0.580661	-0.580661	0.441911	0.567724	0.277633	2.41143	1.63934	-0.580661	-0.580661	-0.580661	-0.580661	-0.580661	1.33127	-0.580661	2.76827	-0.580661	2.48698	2.32329	1.31484	-0.580661	1.83369	-0.580661	1.54387	-0.580661	2.37738
PGM1	0.558764	0.332872	-0.27327	0.616547	0.478108	0.352502	0.98348	-0.491307	1.32734	-0.66821	0.810772	0.633504	0.208289	0.602993	0.634634	-0.365289	0.412795	0.758123	0.408286	-1.29358	0.430403	0.788933	0.547479	0.707621	1.10557	0.270233	-0.456544	0.410491	-0.872285	0.564601	0.275498	0.161058	0.0902972	0.109964	0.103788	0.704428	0.406933	-2.65754	0.347816	-0.973807	0.855332	0.736317	1.03278	1.29806	0.825321	1.03312	0.519326	-1.34359	0.513177
MAOA	1.42275	-0.828163	-0.828163	-0.828163	-0.828163	-0.828163	-0.828163	-0.828163	1.90714	1.59525	-0.828163	1.26785	-0.828163	1.56551	1.55546	1.15275	1.99584	0.795546	1.21936	1.29543	1.15044	0.394185	-0.040244	-0.828163	-0.828163	-0.828163	1.60739	1.11966	1.25595	1.1428	1.37963	-0.174442	0.788797	1.23033	1.33257	1.18864	1.0208	1.96795	1.79174	-0.343352	0.879127	1.76913	2.24233	1.78778	-0.828163	1.18508	1.73577	-0.29908	-0.828163
PRSS23	0.475495	0.445364	0.977586	1.07941	0.856342	-0.151388	1.38991	1.53079	1.36093	0.828841	-0.325162	0.589481	0.704368	0.100425	-0.500455	0.6001	0.576685	0.36156	0.427264	-0.685909	0.351166	0.183546	0.547586	0.0975189	0.110621	0.132728	0.0193231	2.10273	-0.149499	0.399356	-0.0776403	0.836364	-0.780235	-0.115627	-0.116525	0.423113	-0.570507	-1.25929	1.18921	-1.30252	1.38795	0.399334	1.58143	0.129719	1.20142	1.1123	0.525708	0.483116	-0.43059
NTRK2	-0.846784	2.0765	-0.846784	-0.846784	-0.846784	-0.846784	1.90686	-0.846784	1.04041	-0.846784	-0.846784	-0.846784	-0.846784	-0.846784	1.34022	0.561519	-0.846784	1.55904	1.4609	0.437947	1.3012	-0.00689423	0.353256	0.779721	-0.846784	-0.846784	1.46466	0.887818	1.31703	0.784273	1.11259	0.767543	-0.355367	1.38784	-0.151938	-0.846784	-0.846784	-0.846784	1.77564	-0.846784	-0.846784	0.0197817	1.69947	-0.846784	-0.846784	-0.846784	-0.846784	-0.846784	-0.846784
PSME1	0.623735	0.131288	0.392786	1.46331	0.084736	0.736048	0.0418433	1.26539	0.910781	1.25397	-0.14276	0.767594	0.510481	0.731725	0.260544	1.1385	0.679329	0.935185	0.51349	1.43716	0.247879	0.428377	0.254483	0.64881	1.60535	0.0204097	1.15494	0.91681	1.88261	0.704754	0.193372	-0.621323	0.244317	0.218825	-0.134795	-0.490516	-1.07347	1.59995	1.08645	0.657956	0.312615	0.20136	1.32919	0.537464	0.719459	0.67319	1.4946	-0.124752	-0.417082
MID1IP1	1.8676	-0.763816	1.89372	-0.763816	-0.763816	-0.763816	1.7384	1.12725	1.78481	1.1199	-0.763816	0.994635	0.634299	0.473042	0.788967	1.21356	1.72722	1.45398	1.25695	-0.763816	-0.763816	-0.763816	1.22662	0.748074	0.799175	-0.763816	1.84336	1.49194	0.652557	1.50167	1.56407	0.932568	-0.763816	-0.763816	0.48609	-0.763816	-0.763816	-0.763816	1.62492	1.29205	2.16204	1.03513	1.33983	1.96092	2.23907	-0.763816	1.93471	-0.763816	1.53487
SPARCL1	1.04015	1.52343	0.643571	1.21123	0.819359	1.13731	1.02817	0.278067	0.476233	-1.25549	0.353298	1.60965	1.68622	1.15454	0.514769	1.02178	1.79159	1.13739	0.360878	0.628143	0.894715	1.35207	0.595758	-1.25549	1.36432	0.773694	1.39398	-0.292468	0.147409	1.36724	1.41054	0.807093	-0.397801	-1.25549	0.566466	1.14659	-1.25549	1.86693	0.969043	1.17309	1.05438	-1.25549	2.21588	-1.25549	-1.25549	1.52791	1.16031	0.846588	-1.25549
AASS	0.438974	1.71735	1.02159	1.04955	0.248711	0.683852	1.4441	0.786626	1.28079	-1.26906	0.758771	1.25681	0.344256	1.07878	0.851869	0.922985	0.988709	1.56172	0.706976	0.298434	0.683035	0.694833	0.945299	-1.26906	0.962021	-0.233162	1.42531	0.0595405	0.166584	0.829855	1.02675	0.729905	0.759613	0.551631	0.96564	0.698208	-0.0929353	1.25563	1.25516	0.660872	1.18657	1.40288	1.7011	-1.26906	1.7234	1.62474	0.78954	-1.26906	0.307077
COL4A1	1.53296	1.61858	0.265162	1.58354	-0.71157	-0.71157	2.05427	0.110782	2.15405	-0.71157	1.3946	1.15781	0.67364	1.20767	-0.71157	2.06558	1.93861	1.31943	2.0843	-0.71157	0.618041	2.03578	-0.71157	-0.71157	1.17926	-0.71157	-0.71157	1.48851	1.0298	1.12077	-0.00407996	-0.71157	0.793841	-0.71157	-0.0116842	0.713469	1.43447	2.09797	1.8966	-0.71157	1.84826	2.07369	2.67437	-0.71157	2.34623	1.47054	1.2383	-0.169409	-0.71157
PLTP	-0.40888	0.855687	1.82741	1.28699	0.747094	0.729382	1.08723	0.98954	0.827381	1.04696	0.102192	1.29636	0.601814	0.27798	1.06078	1.5022	1.56432	1.50245	0.139962	0.601739	1.15488	1.07863	1.10409	-1.27161	0.723442	0.262068	1.17612	0.587402	0.107	1.3757	0.865462	0.460087	0.436633	-1.27161	-1.27161	0.88743	-0.816233	1.95679	1.08793	1.15993	1.29664	-1.27161	1.16604	0.951244	0.237116	1.67278	1.54881	0.588182	0.345285
FGF12	-0.743411	-0.743411	-0.743411	-0.0832932	-0.743411	-0.743411	2.16104	-0.743411	1.19276	-0.743411	-0.743411	1.2452	-0.743411	-0.743411	-0.743411	-0.196962	-0.743411	-0.743411	1.77606	-0.743411	-0.743411	-0.743411	1.65262	-0.743411	-0.743411	0.0336916	-0.743411	1.04117	-0.743411	0.841699	0.717855	-0.743411	-0.743411	-0.0926888	1.249	0.0587444	0.971363	-0.743411	1.4545	1.68141	-0.743411	-0.743411	-0.743411	-0.743411	1.98578	-0.743411	-0.743411	1.58143	-0.743411
RPL27A	1.81699	1.0646	0.5933	1.34874	-0.0607228	0.183732	2.28552	1.2166	2.17048	0.159992	0.309446	0.524268	0.0837722	0.498943	0.170564	-0.137122	0.787399	1.39323	0.528941	0.936217	0.407384	-0.130461	-0.0912956	0.676357	1.06879	-0.144675	0.414357	0.833736	3.35344	0.978359	-0.50484	-0.93075	-0.988198	0.0532554	-0.932332	-0.377321	-1.12943	1.99758	0.52927	0.850785	1.87917	2.33778	2.17816	1.32257	2.71682	2.02341	1.94007	-1.40469	0.442756
ADAMTS5	1.79839	-0.708603	-0.708603	-0.708603	-0.708603	-0.708603	1.6465	-0.708603	1.30902	1.10437	-0.708603	1.47988	1.69891	-0.708603	-0.708603	-0.708603	2.05061	1.56076	1.56076	-0.708603	0.841235	0.816079	1.52406	-0.708603	1.60409	-0.708603	-0.708603	0.651036	1.36311	1.42379	1.84964	1.02722	0.846162	1.74875	1.14273	1.83322	-0.708603	2.51621	1.54606	1.32588	-0.708603	-0.708603	-0.708603	-0.708603	-0.708603	-0.708603	2.04111	-0.708603	-0.708603
MGARP	2.84665	1.58411	1.30651	1.51983	-0.697327	1.4214	2.48733	2.09049	1.99463	1.7458	1.36798	-0.697327	0.982831	1.74131	1.0162	-0.697327	-0.697327	1.09957	1.5767	1.87655	-0.697327	-0.697327	-0.697327	1.35599	1.97155	-0.697327	1.36251	1.79092	0.87255	0.771343	-0.697327	-0.697327	-0.697327	-0.697327	0.531314	0.881299	-0.697327	2.30042	1.87003	-0.697327	-0.697327	1.36642	1.61544	-0.697327	-0.697327	-0.697327	2.14035	-0.697327	-0.697327
DSP	-0.794625	1.82022	-0.794625	1.24997	1.50366	0.934718	-0.794625	-0.794625	1.52692	-0.794625	1.14685	0.391556	-0.794625	0.64111	-0.794625	0.739671	-0.794625	0.982846	1.29861	-0.196049	0.833912	-0.794625	-0.794625	-0.794625	-0.794625	-0.794625	-0.794625	1.78264	1.43065	-0.794625	-0.102643	0.897579	1.16312	-0.794625	-0.794625	-0.163142	1.08236	-0.794625	1.73578	-0.794625	1.88938	2.40819	1.86507	-0.794625	2.36916	-0.794625	-0.794625	-0.794625	-0.794625
GALNT10	1.51869	0.566274	1.49567	1.42812	0.870338	0.594469	1.67613	1.73431	1.64321	0.80993	1.17932	0.663194	1.24469	0.578927	0.584831	0.511466	1.62479	1.72691	1.35066	1.23866	1.0171	0.0315048	0.681265	1.02353	-1.11614	-1.11614	0.881089	1.40049	1.51577	1.19142	0.192371	0.296539	0.341086	-1.11614	1.00887	0.555201	0.523029	1.68938	1.82356	1.11129	-1.11614	0.25105	1.14059	1.11814	0.0611301	0.943917	-0.292508	-1.11614	-1.11614
ZDHHC8P1	1.82205	0.840062	1.62205	1.54797	-0.909814	-0.909814	0.8643	1.51336	1.48308	-0.909814	-0.909814	1.33222	-0.500819	-0.909814	-0.909814	-0.909814	0.777373	1.43204	1.40792	0.839037	-0.400482	0.3111	0.0439108	1.43512	-0.909814	-0.909814	0.511191	1.34934	1.30784	1.25793	0.236605	-0.909814	-0.909814	1.55602	-0.909814	0.479217	-0.365902	2.4005	1.16972	-0.909814	-0.909814	1.69668	1.60585	0.68966	1.45158	1.72454	1.25883	-0.909814	1.06805
RPL21	1.33053	0.516371	1.00761	1.26742	0.247534	0.0589279	2.22535	0.762643	1.44385	0.778939	0.55963	0.738566	0.150509	0.545042	-0.00411799	0.488068	0.799819	1.56403	0.0922027	1.04002	0.487294	0.222788	0.61652	0.0372421	1.25671	-0.0180607	1.45669	0.348878	2.87206	1.14938	0.104794	-0.616308	-0.189986	0.850237	-0.366282	0.488234	-0.90327	2.77532	1.14035	0.23078	1.59069	1.86255	2.20356	1.00685	1.88815	1.83872	2.36009	-0.389614	0.376316
UBE2QL1	-0.448175	-0.448175	-0.448175	-0.448175	-0.448175	-0.448175	-0.448175	-0.448175	2.27086	-0.448175	-0.448175	1.85316	-0.448175	-0.448175	2.30071	2.43989	-0.448175	-0.448175	3.01824	-0.448175	-0.448175	-0.448175	-0.448175	-0.448175	-0.448175	-0.448175	-0.448175	2.2134	1.51667	2.14237	-0.448175	0.290721	0.387837	-0.448175	-0.448175	2.918	1.99106	-0.448175	2.92054	-0.448175	-0.448175	-0.448175	2.61646	0.60136	-0.448175	-0.448175	-0.448175	-0.448175	-0.448175
IFIT3	2.73801	-0.532693	1.82831	2.08103	-0.532693	2.34741	2.67221	2.21855	1.97057	2.06088	-0.532693	0.72575	-0.0740084	0.0145969	1.78062	1.62528	1.91	-0.532693	2.14414	1.80807	-0.532693	2.04547	1.74558	-0.532693	2.66195	-0.532693	-0.532693	1.1436	0.229076	1.22624	-0.0218428	-0.532693	-0.532693	-0.532693	-0.532693	-0.532693	-0.532693	-0.532693	2.133	-0.532693	-0.532693	-0.532693	2.60023	2.14335	-0.532693	-0.532693	-0.532693	-0.532693	0.440842
HEYL	-1.14216	-1.14216	-1.14216	1.13368	0.0299341	0.768076	-1.14216	-1.14216	0.821688	-1.14216	1.2645	1.237	-1.14216	-0.670662	0.78751	-1.14216	-1.14216	0.863768	1.48558	-0.310705	0.842614	0.118356	0.907125	0.75364	1.32691	-1.14216	-1.14216	1.11545	1.53187	-0.298698	0.837089	-0.247085	0.0720073	-1.14216	0.750735	0.0190801	1.19471	1.09175	1.49989	1.14859	1.24174	0.464532	2.02435	1.73317	1.78989	-1.14216	-0.365382	-0.228656	0.296849
HS3ST1	1.72047	0.742025	1.30699	1.48421	0.898282	0.262255	1.69044	1.41912	1.6087	1.51957	-0.651313	1.08315	1.45088	0.717435	0.677117	1.29058	1.33673	0.888647	1.43892	1.16732	1.03429	0.922301	1.05884	-1.11633	1.24294	-1.11633	0.467122	1.436	0.760279	1.4175	0.998258	0.271622	-0.724457	0.503785	0.519159	-0.244765	0.872532	1.96831	1.59775	-0.0935179	1.1971	1.29028	1.18715	1.23395	1.01993	1.63554	1.49376	0.970911	0.41049
RTP4	3.93783	-0.282232	-0.282232	-0.282232	-0.282232	-0.282232	4.90195	-0.282232	1.88602	-0.282232	-0.282232	-0.282232	2.01102	3.24819	-0.282232	-0.282232	-0.282232	-0.282232	2.02445	-0.282232	-0.282232	-0.282232	-0.282232	-0.282232	-0.282232	-0.282232	-0.282232	-0.282232	-0.282232	-0.282232	-0.282232	-0.282232	-0.282232	-0.282232	-0.282232	1.63592	-0.282232	-0.282232	3.397	-0.282232	-0.282232	-0.282232	-0.282232	-0.282232	-0.282232	-0.282232	4.98913	-0.282232	-0.282232
ZSWIM5	-0.529584	-0.529584	-0.529584	-0.529584	-0.529584	-0.529584	-0.529584	-0.529584	-0.529584	-0.529584	-0.529584	-0.529584	2.72568	-0.529584	-0.529584	-0.529584	-0.529584	-0.529584	-0.529584	-0.529584	-0.529584	-0.529584	-0.529584	-0.529584	-0.529584	-0.529584	-0.529584	0.233642	-0.529584	1.61898	2.14944	-0.529584	-0.529584	1.06468	1.08164	0.84124	-0.529584	-0.529584	-0.529584	-0.529584	-0.529584	0.767766	-0.529584	-0.529584	-0.529584	-0.529584	-0.529584	-0.529584	-0.529584
COL14A1	0.28047	2.03647	1.52444	1.80373	-0.924782	0.530032	2.00446	1.11455	1.53224	-0.304589	-0.924782	0.784628	-0.924782	0.97406	0.14799	1.42682	1.51251	1.70998	1.06584	0.229348	-0.0088802	0.866441	0.967276	-0.924782	0.983937	1.26556	1.23962	1.26424	1.45214	1.41048	0.28533	1.06515	0.614233	-0.924782	-0.245953	0.372953	0.160514	2.01341	1.51765	-0.924782	1.5208	1.96084	1.89726	1.18209	1.46282	1.67755	1.42361	-0.924782	-0.924782
LAMB2	1.62211	0.629688	1.06897	1.34305	0.901712	0.82782	1.35837	1.26844	1.11596	0.975407	-0.571156	1.27193	1.12862	1.17	0.839526	1.44489	1.55184	1.44691	1.04488	0.493871	0.431701	1.09972	1.24766	-1.04078	-1.04078	-0.540693	1.39368	1.1126	1.46044	1.38152	1.37406	0.53439	0.0854953	0.758856	0.0440357	0.552725	1.14843	2.1665	1.39775	1.5117	1.24113	1.33241	1.57522	0.794454	0.164575	1.29299	1.9291	0.911205	0.501182
TCEAL7	-0.684218	0.579221	1.87155	-0.0320467	2.01702	-0.684218	2.40744	-0.684218	1.53756	1.56446	1.90105	1.0393	1.06726	0.986247	1.31355	0.337529	2.30565	1.83502	2.01294	-0.684218	1.02587	-0.684218	0.993755	2.28534	0.227263	-0.684218	-0.684218	1.4236	0.908119	1.40804	-0.684218	-0.684218	1.26348	-0.684218	-0.684218	0.829311	0.531609	2.46094	2.03304	-0.684218	1.4054	-0.684218	2.25012	-0.684218	0.387219	2.18897	1.94027	-0.684218	-0.684218
MARVELD1	-0.789284	1.70297	-0.203856	2.03046	-0.789284	1.26888	0.0219445	2.1179	1.7494	-0.789284	-0.789284	1.61633	-0.340498	1.69788	-0.789284	0.772693	1.33426	1.48885	0.955011	-0.789284	-0.789284	-0.789284	0.394123	-0.789284	-0.789284	1.43815	1.56828	1.26298	1.44356	1.35385	0.379738	0.809966	-0.789284	1.0299	1.23705	1.34239	-0.789284	-0.789284	1.66632	0.592524	1.37356	1.18805	0.173455	-0.789284	-0.789284	-0.789284	1.61808	-0.789284	0.492467
C3orf62	-0.562831	-0.562831	-0.562831	1.93252	-0.562831	-0.562831	2.06337	-0.562831	2.37748	-0.562831	-0.562831	-0.562831	1.51907	-0.562831	-0.562831	-0.562831	1.16282	1.29908	1.98185	-0.562831	-0.562831	-0.562831	0.870174	-0.562831	-0.562831	-0.562831	-0.562831	2.36814	1.92781	-0.562831	1.65156	1.86717	1.59744	2.61613	1.36115	1.39109	1.88678	-0.562831	2.28264	1.73016	-0.562831	2.60056	-0.562831	2.34959	-0.562831	0.840047	-0.562831	-0.562831	-0.562831
GSTA4	2.15109	1.51184	1.31887	1.41264	-0.915268	-0.915268	1.80238	1.35699	1.67079	0.753485	-0.915268	1.38799	1.0512	1.62133	0.938759	1.19148	1.97767	1.24333	1.44306	1.71968	0.511283	-0.915268	-0.915268	1.02566	1.86286	-0.915268	1.4261	1.35575	-0.915268	1.26432	0.0293389	0.285985	0.861182	-0.915268	0.465914	1.25817	0.0263421	1.29375	1.55755	-0.915268	1.05488	-0.0855107	0.547722	-0.0654648	-0.915268	-0.915268	1.76306	-0.915268	-0.915268
PABPC5	-0.27865	-0.27865	3.03325	-0.27865	-0.27865	-0.27865	-0.27865	-0.27865	-0.27865	-0.27865	-0.27865	-0.27865	-0.27865	-0.27865	-0.27865	-0.27865	2.49529	-0.27865	2.62305	-0.27865	-0.27865	-0.27865	-0.27865	-0.27865	-0.27865	-0.27865	-0.27865	-0.27865	-0.27865	-0.27865	1.59675	-0.27865	-0.27865	-0.27865	-0.27865	-0.27865	-0.27865	-0.27865	3.67632	-0.27865	-0.27865	-0.27865	-0.27865	-0.27865	-0.27865	5.4364	-0.27865	-0.27865	-0.27865
NES	-0.291881	-0.291881	-0.291881	-0.291881	-0.291881	-0.291881	-0.291881	-0.291881	-0.291881	-0.291881	-0.291881	-0.291881	-0.291881	4.56773	-0.291881	-0.291881	-0.291881	-0.291881	3.00088	-0.291881	-0.291881	-0.291881	-0.291881	-0.291881	-0.291881	-0.291881	-0.291881	2.23988	1.85093	-0.291881	3.23052	1.78312	-0.291881	-0.291881	-0.291881	2.9817	-0.291881	-0.291881	4.06265	-0.291881	-0.291881	-0.291881	-0.291881	-0.291881	-0.291881	5.01324	-0.291881	-0.291881	-0.291881
MYCN	-0.227404	-0.227404	-0.227404	-0.227404	-0.227404	-0.227404	-0.227404	-0.227404	3.92714	-0.227404	-0.227404	-0.227404	-0.227404	-0.227404	-0.227404	-0.227404	-0.227404	-0.227404	-0.227404	-0.227404	-0.227404	-0.227404	-0.227404	-0.227404	-0.227404	-0.227404	-0.227404	5.05686	-0.227404	-0.227404	3.45989	-0.227404	-0.227404	-0.227404	-0.227404	-0.227404	-0.227404	-0.227404	3.18904	-0.227404	-0.227404	-0.227404	-0.227404	5.38028	-0.227404	-0.227404	-0.227404	-0.227404	-0.227404
GBP2	-1.3601	0.259832	0.983878	-1.3601	0.733271	-1.3601	1.01263	-0.866812	0.259404	1.00731	0.73103	0.171553	0.427282	0.915415	1.00372	0.527808	1.0155	1.02302	0.602295	-1.3601	0.0716818	0.396335	-1.3601	-0.491818	1.03937	1.3208	-1.3601	0.20082	0.212339	0.889896	0.595273	0.756988	0.199225	0.754159	0.215812	1.03758	0.821375	1.03503	1.11036	-1.3601	1.36331	1.42101	1.46251	1.35317	1.88294	1.17743	0.427752	0.952754	-1.3601
CACNB3	0.645253	-0.261678	1.09706	1.3924	-1.14009	1.11243	-0.084618	1.16644	0.547959	-1.14009	-0.262746	0.642234	-0.782002	1.21634	0.172831	1.24285	1.4719	1.42523	0.7032	0.420344	-1.14009	0.649295	0.849964	-1.14009	-1.14009	-1.14009	1.24056	0.97645	0.737507	1.22176	-0.397354	-1.14009	-0.0398403	-1.14009	-0.746457	0.835755	-1.14009	2.06338	1.24194	1.49779	1.13661	-1.14009	1.18058	1.34367	0.381	1.15808	1.48392	-0.677406	-1.14009
CCDC80	-0.784048	0.386899	1.44379	1.57889	1.60289	1.73935	2.04494	-0.784048	1.22811	-0.784048	0.0397453	1.67056	1.49103	1.69761	0.381924	1.30796	1.37213	1.48045	1.36985	-0.784048	1.03888	0.199968	1.40228	-0.784048	2.00837	-0.784048	1.96471	0.416368	0.570041	1.86124	0.803317	0.581046	0.309446	1.19059	0.875578	1.32739	0.00588348	2.1971	0.713291	1.63457	1.71208	-0.784048	2.14457	-0.784048	1.97526	1.09858	1.3628	-0.784048	1.67966
RAB3B	-0.583321	-0.583321	2.13076	1.88398	-0.583321	-0.583321	2.76025	-0.583321	1.66148	-0.583321	-0.583321	-0.583321	2.15113	-0.583321	-0.583321	-0.583321	-0.583321	-0.583321	0.198731	-0.583321	1.08698	-0.583321	-0.583321	1.66916	-0.583321	-0.583321	-0.583321	1.35294	-0.583321	2.26699	-0.583321	-0.583321	0.0101179	-0.583321	1.50915	-0.583321	-0.583321	2.06733	2.12196	-0.583321	-0.583321	0.463152	-0.583321	-0.583321	1.05821	1.43461	2.70862	-0.583321	-0.583321
STON1	-0.811861	-0.811861	1.05425	-0.811861	-0.811861	0.584241	0.814037	0.055702	1.40943	-0.811861	-0.811861	0.40163	-0.163089	1.37937	-0.811861	-0.131816	-0.811861	-0.811861	-0.811861	-0.811861	0.648213	0.965142	0.700992	2.60093	-0.811861	-0.811861	-0.811861	0.370401	0.705687	1.90869	-0.0893056	0.470124	-0.811861	-0.811861	1.4346	1.09465	-0.811861	2.24081	1.73929	0.595402	0.652726	0.537721	-0.811861	2.17619	2.13751	-0.811861	-0.811861	0.0264157	1.55068
SERPINA5	0.185353	-0.573809	0.397444	-0.573809	-0.573809	1.56721	2.07313	2.00468	0.69564	-0.573809	1.55512	1.84622	1.87019	1.74746	-0.573809	1.63897	2.16463	2.19653	1.88267	-0.573809	-0.573809	-0.573809	-0.573809	-0.573809	1.67343	-0.573809	0.551684	2.60373	1.72214	2.27368	1.58609	-0.573809	-0.573809	-0.573809	1.53052	1.5248	-0.573809	2.55186	1.14882	-0.573809	2.6187	-0.573809	-0.573809	0.949462	-0.573809	2.64834	-0.573809	-0.573809	1.05404
ZNF621	-1.05611	1.21619	-1.05611	1.33946	1.21386	1.16061	-1.05611	-1.05611	-1.05611	-1.05611	-1.05611	0.622328	-1.05611	0.904537	-1.05611	0.6349	1.08552	-0.20436	1.3529	-1.05611	-0.546551	-1.05611	-1.05611	0.215417	-1.05611	-1.05611	1.34572	0.227683	-0.37656	0.249504	-0.600398	0.230236	-0.17092	-1.05611	0.000998835	-1.05611	0.583056	-1.05611	-0.0453479	1.17839	0.55339	0.804023	0.309198	-1.05611	-1.05611	1.34445	-1.05611	0.26795	-1.05611
TNNC2	0.557757	-0.697209	-0.697209	0.176174	-0.697209	-0.697209	1.03137	-0.697209	0.728511	-0.697209	-0.697209	-0.697209	0.366434	-0.697209	-0.697209	-0.697209	1.27897	1.67593	0.831613	0.308795	2.03981	-0.697209	-0.697209	-0.697209	1.70305	0.330954	-0.697209	1.74749	2.69206	1.2818	-0.697209	0.021931	0.794934	-0.697209	-0.697209	-0.697209	1.31082	1.26214	0.719192	-0.697209	2.43226	0.737603	-0.697209	-0.697209	0.737652	-0.697209	2.70696	1.73293	-0.697209
IGFBP7	0.981202	0.842084	1.17751	1.2061	0.81156	0.865939	1.4862	0.896599	0.988798	0.86584	0.634837	1.34721	1.23309	1.14318	0.781698	1.05698	1.73009	1.02272	1.01463	0.978551	0.351227	1.31429	0.770059	-1.55668	0.315176	0.7113	1.6686	0.240834	0.652237	1.40129	0.861363	0.123135	0.0178027	-1.55668	0.467888	0.752385	-0.0358919	1.34434	0.775651	1.07718	1.35231	1.22213	1.74926	0.971455	0.678856	1.45666	1.46176	0.975535	-1.55668
AHNAK	-1.37653	1.06955	0.822892	1.25638	0.726687	0.569879	1.28537	-0.885032	0.931884	0.926879	-1.37653	1.06651	1.17652	0.960822	1.00921	0.389826	0.734705	1.57666	1.17319	0.412417	0.776721	0.742753	1.19628	0.652222	1.26327	0.935221	1.43223	0.609762	1.21441	1.44049	1.41886	0.577019	0.39122	0.48398	0.896292	0.847923	0.363031	1.86889	1.72323	0.506085	0.459371	0.855373	1.54062	-1.37653	0.688779	1.55223	1.1529	0.454968	0.261279
AC018647.1	-0.674899	-0.674899	2.22944	-0.674899	1.09192	-0.674899	2.27526	-0.674899	0.935271	-0.674899	-0.674899	1.84593	-0.674899	0.350974	-0.674899	-0.674899	0.849681	0.860378	1.91431	-0.674899	-0.674899	-0.674899	1.64185	-0.674899	-0.674899	-0.674899	-0.674899	1.98369	2.28874	1.49331	-0.674899	-0.674899	1.21779	-0.674899	-0.674899	1.30198	1.89326	-0.674899	2.19166	-0.674899	2.33977	-0.674899	1.35877	-0.674899	-0.674899	-0.674899	-0.674899	-0.674899	2.20485
CNN3	-0.619137	-0.282417	-0.0425269	0.413689	1.02585	0.511994	-0.254182	0.443812	-0.105717	-1.42752	-1.52009	-0.385241	0.0223487	0.179621	-1.69146	-0.0911264	1.33658	1.54557	0.604269	-3.38031	-0.171466	-1.44874	-0.830226	0.336383	0.876056	-0.902232	2.20105	0.336663	0.201502	1.10896	0.213747	0.997533	0.880311	-0.564722	0.0796145	0.114741	-1.03294	1.73971	1.36671	0.742846	2.62304	0.48548	2.18811	3.04296	1.49992	0.45505	-2.19707	-0.101614	-0.990361
ZNF347	-0.673322	0.293887	1.9059	-0.673322	1.06836	-0.673322	-0.673322	-0.673322	1.60345	0.524648	-0.673322	1.16493	-0.673322	-0.673322	-0.673322	-0.0975111	1.81175	-0.673322	1.08962	2.0004	-0.673322	-0.673322	1.11636	-0.673322	-0.673322	-0.673322	-0.673322	1.57481	1.46246	-0.0370999	0.252914	1.11912	-0.0252998	-0.673322	-0.673322	0.171935	-0.673322	2.82988	0.683646	-0.673322	2.09988	-0.673322	-0.673322	-0.673322	1.30035	-0.673322	-0.673322	-0.673322	2.44137
AC018647.2	-0.410006	-0.410006	-0.410006	-0.410006	3.01478	-0.410006	2.72345	-0.410006	-0.410006	-0.410006	-0.410006	2.72103	-0.410006	-0.410006	-0.410006	-0.410006	1.26385	3.4256	-0.410006	1.63856	-0.410006	-0.410006	2.05345	-0.410006	-0.410006	-0.410006	-0.410006	1.85642	0.789686	0.426628	-0.410006	-0.410006	-0.410006	-0.410006	-0.410006	-0.410006	-0.410006	-0.410006	1.59838	-0.410006	2.60189	3.76065	-0.410006	-0.410006	1.09273	-0.410006	2.27508	-0.410006	-0.410006
PCED1B	2.83884	1.39887	-0.492436	-0.492436	-0.492436	-0.492436	-0.492436	2.94141	2.11845	2.49474	-0.492436	1.72757	0.44668	2.52457	0.148116	-0.492436	1.91372	1.99551	0.593915	-0.492436	2.36117	2.36622	0.799958	-0.492436	3.09912	-0.492436	-0.492436	2.01841	1.48081	0.553705	1.35267	-0.492436	-0.492436	-0.492436	-0.492436	1.65727	0.463789	2.83344	2.259	-0.492436	-0.492436	-0.492436	-0.492436	1.29688	-0.492436	2.40067	-0.492436	-0.492436	-0.492436
CRACR2A	-0.68671	-0.68671	-0.68671	-0.68671	-0.68671	-0.68671	-0.68671	-0.68671	1.67129	1.93344	-0.68671	-0.68671	1.19047	-0.68671	-0.68671	-0.68671	-0.68671	-0.68671	1.61737	-0.68671	-0.68671	-0.68671	-0.68671	-0.68671	-0.68671	-0.68671	-0.68671	-0.68671	0.899942	-0.0923285	1.20111	0.782757	-0.0813045	-0.68671	0.517984	1.60631	0.681879	-0.68671	1.69437	-0.68671	-0.68671	-0.68671	-0.68671	-0.68671	-0.68671	-0.68671	1.75147	0.780692	2.16407
PKD2	1.83999	1.57951	-0.739464	1.01756	1.28259	-0.739464	-0.739464	-0.739464	1.06956	-0.739464	-0.739464	1.28297	1.20569	1.99064	-0.739464	-0.739464	1.77824	1.99832	1.08675	-0.739464	1.1511	1.24987	0.396358	-0.739464	1.65812	-0.739464	1.851	0.927932	1.38703	1.46156	1.2048	0.477572	-0.16487	-0.739464	-0.739464	1.30805	0.210845	2.44942	1.31412	-0.739464	2.33977	-0.739464	1.6292	-0.739464	1.81051	-0.739464	0.218009	1.26685	-0.739464
CST3	0.48301	0.831669	1.03597	1.02301	0.797056	0.93205	1.31041	0.698487	0.973621	0.901769	0.550008	1.12704	0.383968	0.531878	0.985682	0.762727	0.94667	1.38073	0.683726	1.20245	0.819008	0.955432	0.799773	0.141051	1.03415	1.03324	0.908541	0.525326	1.67332	1.32601	0.582969	-0.72461	-0.589457	-0.323014	0.105858	0.48375	0.0501424	1.19464	0.738369	0.167231	0.877914	0.0836262	1.37856	0.578694	0.77865	0.964865	1.35426	0.474093	-0.849067
TIMP3	0.662741	-1.17084	-0.430042	-1.17084	0.696486	-1.17084	1.96513	-1.17084	0.7968	0.909279	1.27174	1.67865	1.55096	1.18316	0.0183813	-1.17084	1.67982	0.715983	0.419347	-1.17084	0.723928	1.25158	0.729488	-1.17084	1.5867	1.06591	0.948872	0.862694	0.851811	0.77739	1.15892	-0.297083	-1.17084	-1.17084	0.649018	-1.17084	0.338265	-1.17084	0.641361	-1.17084	-0.557531	0.0878666	1.21624	1.05082	1.43361	1.01561	-1.17084	0.845717	0.971948
MALAT1	1.82053	1.56775	1.09911	1.34099	0.792347	0.3077	1.64838	0.743387	1.3027	0.618716	0.722574	1.0824	1.04572	1.10618	0.660604	0.864589	1.31407	1.19798	1.04917	1.00843	0.707494	0.511913	1.13407	0.655527	0.548303	-1.13156	1.39501	1.10945	1.53857	1.09605	0.943294	0.372745	0.498299	0.663013	0.63448	1.04992	0.720898	1.81591	1.28415	0.832529	1.72193	2.08535	1.66332	0.0570295	2.00499	1.31056	1.70925	-0.686038	0.502382
TSPO	-1.05755	-0.391166	0.614176	1.29015	0.573367	-1.05755	1.97513	1.57606	1.40621	0.287514	-1.05755	0.59866	0.587898	0.673599	0.891991	0.860097	1.63402	1.54892	1.19847	1.59468	0.75537	-1.05755	-1.05755	-1.05755	1.58836	0.979423	1.45052	1.64029	2.11816	0.687393	0.722627	0.48128	-0.125968	-1.05755	0.0594563	0.227833	0.423097	1.58634	1.49759	0.107773	1.10552	1.19558	1.85085	1.33649	1.45478	1.45232	1.0559	0.96659	0.772728
SLC39A13	-0.84301	-0.84301	1.97401	0.814923	-0.84301	0.968259	-0.0770511	-0.84301	1.5758	-0.197262	-0.84301	1.5267	1.7921	0.639404	1.38162	1.5467	0.704105	1.67139	0.277044	0.358676	1.56669	-0.256413	0.145104	0.870027	-0.84301	-0.84301	1.52998	1.74572	0.863004	1.07179	0.480321	0.879867	0.998408	1.63375	1.51694	0.268757	1.095	2.08488	1.6292	-0.84301	0.295381	0.0384645	1.79451	-0.84301	0.789341	-0.84301	2.21956	1.55172	-0.84301
APOL2	1.52267	-0.64213	2.04955	1.62966	-0.64213	1.09072	2.07913	1.65739	2.08713	-0.64213	-0.64213	0.60697	1.78602	1.77013	0.936677	-0.64213	1.73768	0.366931	1.01424	0.732569	-0.64213	-0.64213	-0.64213	-0.64213	-0.64213	-0.64213	1.758	1.72281	1.76965	2.06725	0.936285	0.745864	-0.64213	-0.64213	-0.64213	0.423363	1.09206	-0.64213	1.68787	2.39476	1.69404	1.09948	1.36578	2.57552	1.8178	2.48017	-0.64213	1.12478	-0.64213
DOCK10	-0.500268	-0.500268	-0.500268	-0.500268	-0.500268	-0.500268	-0.500268	1.58964	1.16133	-0.500268	-0.500268	1.52021	0.168485	2.2052	-0.500268	-0.500268	-0.500268	-0.500268	2.64749	-0.500268	-0.500268	-0.500268	1.26317	-0.500268	-0.500268	-0.500268	-0.500268	1.18679	0.610376	1.72304	2.37245	-0.500268	-0.500268	-0.500268	-0.500268	2.37421	-0.500268	-0.500268	3.07396	-0.500268	-0.500268	1.3787	3.05282	-0.500268	-0.500268	0.759503	-0.500268	-0.500268	-0.500268
NUPR1	1.72935	0.435757	0.962427	0.823346	0.150671	0.12433	1.26087	0.124869	0.895785	1.07499	0.72413	0.651875	0.210677	0.807758	0.43238	0.343655	0.960771	1.33435	1.29743	0.900263	0.486309	0.265808	0.444125	-0.148309	1.70592	0.203463	0.718904	1.48937	2.74898	1.38157	0.259062	-0.18183	-0.520382	0.42831	0.222982	0.960356	0.269545	2.03708	1.73664	1.05104	1.19557	1.48068	1.62482	1.43484	1.60067	1.62221	1.97717	0.176794	0.191124
RGN	-0.580596	-0.580596	-0.580596	-0.580596	-0.580596	-0.580596	1.00302	2.38808	1.81685	-0.580596	2.13886	0.699992	1.80078	-0.580596	2.04302	-0.580596	-0.580596	1.93021	1.50761	0.775498	-0.580596	-0.580596	-0.580596	-0.580596	-0.580596	-0.580596	1.42471	1.82065	1.58248	-0.580596	0.818911	-0.580596	-0.580596	-0.580596	-0.580596	0.600334	1.46664	-0.580596	1.87928	-0.580596	-0.580596	-0.580596	1.21211	-0.580596	-0.580596	3.28801	2.02336	-0.580596	2.59879
PLD1	1.5775	0.534208	-0.324744	1.40201	1.45418	0.743951	-1.17569	-1.17569	1.6142	-0.0212052	0.944053	0.542555	0.840195	1.02934	-0.323426	1.06942	0.803127	0.477527	0.69644	0.593055	0.907566	-1.17569	-0.0072589	-1.17569	-0.391516	-1.17569	1.55215	0.341157	0.663247	0.171609	-0.0214621	1.22435	1.25102	-0.354978	1.04626	0.870163	1.53695	1.49553	0.853062	1.0075	0.931129	-0.253933	1.4173	-1.17569	1.7217	-1.17569	1.50089	-1.17569	-1.17569
LURAP1L	-0.434899	-0.434899	-0.434899	2.71242	-0.434899	0.72934	2.53095	-0.434899	2.3888	-0.434899	-0.434899	2.03492	-0.434899	-0.434899	-0.434899	-0.434899	1.47454	-0.434899	2.79003	-0.434899	-0.434899	-0.434899	-0.434899	-0.434899	-0.434899	-0.434899	-0.434899	2.06548	1.66859	-0.434899	1.45084	-0.434899	-0.434899	-0.434899	0.467526	-0.434899	1.90366	2.41578	2.91912	-0.434899	-0.434899	3.31588	2.80532	2.96959	3.22955	-0.434899	-0.434899	-0.434899	-0.434899
PAPSS2	2.3634	-0.529279	-0.529279	-0.529279	0.522814	2.05271	2.18912	-0.529279	2.44744	-0.529279	-0.529279	-0.529279	2.19437	1.0981	-0.529279	2.27267	2.03201	2.24591	1.1595	0.238226	1.83996	1.94836	-0.529279	-0.529279	-0.529279	-0.529279	-0.529279	0.64003	1.4347	-0.529279	1.67188	1.05547	0.0914822	1.94707	-0.529279	2.03321	-0.529279	3.04159	1.91219	-0.529279	-0.529279	2.33448	1.53764	2.29571	1.36137	2.87208	1.29103	-0.529279	-0.529279
TRO	-0.776263	-0.776263	-0.776263	0.154531	1.06785	1.32042	1.59609	1.14127	1.90452	0.603518	0.224854	0.808193	1.43735	1.88159	1.21905	0.718587	1.86467	1.15707	0.692424	0.0834753	-0.776263	-0.776263	1.31466	-0.776263	1.93386	1.71158	-0.776263	1.09225	1.32524	1.64148	1.33892	-0.776263	-0.053828	-0.776263	-0.776263	-0.776263	0.413293	2.14821	1.73605	-0.776263	-0.776263	1.60222	0.100278	1.52148	1.90597	1.70357	-0.776263	-0.776263	-0.776263
MCFD2	1.56704	0.963606	0.865574	-0.648661	0.922117	-0.298441	-4.0883	0.00667196	0.652946	0.534818	0.622194	0.904145	0.246853	-0.360101	-1.14935	0.0869346	0.055214	1.09609	0.806884	1.15301	0.0173038	0.361806	0.42618	-0.0336128	0.139072	-0.351047	1.0507	0.356866	1.16597	-0.314544	0.054226	0.125992	0.416734	0.339804	0.301076	-0.0647873	0.387232	0.602164	0.501996	-0.896194	1.00022	0.476323	0.726459	0.940317	0.325521	0.829665	-0.248238	0.116499	0.0243872
ADGRG1	-3.31064	-0.255171	-0.492735	0.374817	-0.550559	0.864582	-0.312405	-0.511527	1.02398	-1.04191	-0.30269	0.266097	0.421692	0.0108343	-0.922886	0.481129	-0.00860503	0.832155	0.655869	-0.705082	-0.511735	-1.02356	-2.09892	-0.208292	-2.39103	0.183583	-0.28178	0.724743	0.935547	0.675759	-0.607259	-0.234799	0.234687	-0.841855	0.134545	-0.0251643	0.393283	-3.31064	0.856456	1.06627	-0.0650472	0.877299	0.688069	0.82006	0.853746	0.0120865	0.000404724	0.577373	-2.20774
AKAP12	1.41312	1.89997	0.756445	1.30364	0.651555	0.728425	1.36205	0.297032	0.591151	0.853236	0.778314	1.06344	1.31401	1.22552	0.801531	0.775981	1.18484	1.61231	0.575555	1.04815	0.987607	0.604266	0.97869	-0.166466	1.42382	0.661798	1.36003	-0.142715	0.644802	1.27517	1.1285	0.352119	0.0257704	1.22352	0.236164	1.14184	-0.19343	2.26338	1.1372	0.439961	1.3933	0.169548	1.27594	0.897697	1.12596	1.51201	-0.253059	0.489997	0.392296
SULF1	-0.811464	1.88629	0.417186	-0.811464	1.73873	-0.264895	-0.811464	-0.811464	0.979109	-0.811464	-0.811464	1.17043	-0.811464	1.67635	-0.811464	-0.811464	-0.811464	0.712109	1.54603	-0.811464	-0.811464	1.50029	0.627753	-0.811464	-0.811464	0.898454	1.5379	1.85483	1.82499	1.485	-0.811464	0.524833	0.622496	0.240624	0.851298	-0.0933579	0.723638	-0.811464	1.58046	-0.258905	1.81184	2.52751	1.50672	1.94423	2.28647	-0.811464	-0.811464	1.49573	1.44544
EFEMP2	1.20278	0.861488	1.17942	1.06757	0.845517	1.03187	1.65119	-1.12666	1.4775	-1.12666	0.98516	0.666887	0.849158	1.14187	1.20831	0.930293	1.5322	1.46704	0.648941	0.946361	0.851383	0.9229	0.700058	0.798778	1.46093	-1.12666	1.25501	1.26424	1.04833	1.48395	0.731625	-0.096942	-1.12666	0.201955	0.587902	1.19959	-1.12666	1.81648	1.20283	0.964078	0.919818	0.101796	1.41975	0.775959	1.04217	1.40487	1.58326	1.18239	-1.12666
C4orf3	1.48225	-0.168049	0.719897	0.765655	-0.240634	-0.627146	1.75715	0.343049	1.19309	0.87754	0.216515	0.47648	-0.0609687	0.818603	1.98254	0.636249	0.917603	1.73628	1.25693	-0.308438	0.00138134	0.156187	-0.83855	0.542771	1.22325	0.519685	0.183541	0.38053	1.9523	1.34266	0.520138	0.156124	0.52402	-0.561778	0.346992	1.03965	0.873063	0.0161447	1.61432	0.912431	0.674362	-0.534708	1.85812	0.980079	0.755487	1.16953	0.977935	-1.12131	-0.808475
NTN4	1.34365	1.18792	0.618178	-1.58166	-1.58166	-1.58166	1.48984	-0.181988	0.776915	-1.58166	-1.58166	1.36111	-1.10254	0.75113	1.04401	-0.631176	-0.325581	0.850465	0.884672	0.992051	-1.58166	0.281223	0.175513	0.128772	-1.58166	-1.58166	-1.58166	0.676641	-0.253293	0.880797	0.592978	0.684502	0.230193	0.523367	-0.167616	0.851659	0.636193	1.44398	0.911126	-1.01439	-1.58166	1.61002	1.3469	0.973239	-1.58166	1.68269	-0.639842	0.391847	0.785269
RPL23	2.4803	1.69652	0.124289	0.709029	-0.50915	-0.747635	2.51229	1.28748	1.59901	0.384735	-0.413413	0.244352	-0.788657	0.729945	-0.769265	-0.418291	0.782821	1.38788	0.220553	0.625789	-0.0461396	-0.662538	-0.238897	-0.467116	1.01806	-1.67573	0.219891	0.244299	3.78415	0.420766	-0.552377	-1.31969	-1.06531	0.142991	-0.407311	-0.149472	-0.518521	2.52486	-0.321776	1.33634	1.68846	1.67985	1.90207	0.494078	2.352	1.84331	2.37902	-0.349714	0.594174
C1orf115	-0.44389	-1.14853	-0.128958	1.4886	1.44835	-1.14853	1.57794	1.29009	1.1667	0.771716	0.564608	-1.14853	-0.0658776	0.935382	1.33316	1.11133	1.07604	0.800472	0.996866	-1.14853	-0.666244	-1.14853	0.974234	-0.500388	-1.14853	-1.14853	-1.14853	0.436409	0.410679	0.904121	0.895116	0.839416	0.907625	-1.14853	-1.14853	0.737362	0.057791	-1.14853	0.90819	0.412712	-1.14853	1.23164	-1.14853	-1.14853	1.29611	1.89778	0.928903	1.18138	1.27827
LY6E	-0.00600449	0.639423	1.0128	1.28398	0.156432	0.559208	0.965785	0.0720444	1.15861	0.2048	0.475275	1.11768	0.391364	0.731678	0.796572	0.90966	1.47444	1.16267	1.06213	1.5152	0.275532	0.883529	0.835286	1.01134	1.72207	0.0170701	0.932382	1.37454	1.91652	0.722007	-0.00373973	-0.584772	0.125636	0.822189	0.114717	0.515416	0.560648	1.3914	1.173	0.301314	0.644408	0.858286	1.41441	1.09188	1.24794	0.759766	1.57936	0.742364	-0.0176093
FLRT2	1.76304	1.79912	1.38634	1.36268	-0.904073	1.29251	1.14804	-0.904073	1.30558	-0.904073	-0.904073	-0.292913	1.43789	1.60266	0.675472	-0.0962222	1.83356	1.28622	0.924192	-0.310131	0.135289	1.07553	1.60058	-0.904073	1.98325	0.643714	0.840547	1.43032	0.615774	1.56359	0.822792	0.797375	0.195739	0.806704	-0.456428	1.35636	0.0572283	1.61259	1.45316	1.44231	1.15172	1.76905	1.92775	-0.0364985	1.64045	1.76344	1.49591	-0.904073	-0.904073
GREM1	-0.331067	-0.331067	-0.331067	-0.331067	-0.331067	2.27381	4.10692	-0.331067	3.14457	-0.331067	-0.331067	-0.331067	-0.331067	-0.331067	-0.331067	-0.331067	-0.331067	-0.331067	3.23319	-0.331067	-0.331067	-0.331067	-0.331067	-0.331067	-0.331067	-0.331067	-0.331067	-0.331067	2.77512	-0.331067	-0.331067	-0.331067	-0.331067	-0.331067	-0.331067	-0.331067	-0.331067	-0.331067	2.95833	-0.331067	2.19226	-0.331067	-0.331067	4.63314	-0.331067	-0.331067	-0.331067	-0.331067	-0.331067
IFIH1	1.77595	1.21544	-0.436768	1.60101	1.18802	2.55381	-0.436768	-0.436768	1.75084	-0.436768	-0.436768	-0.436768	2.67605	2.67542	-0.436768	2.60424	-0.436768	-0.436768	-0.436768	-0.436768	0.808339	-0.436768	-0.436768	-0.436768	-0.436768	-0.436768	-0.436768	0.38748	1.64554	1.20074	2.49192	1.24611	-0.436768	-0.436768	-0.436768	-0.436768	-0.436768	-0.436768	2.13667	-0.436768	1.75526	-0.436768	2.67703	-0.436768	3.48388	-0.436768	-0.436768	-0.436768	-0.436768
ASS1	-1.44527	1.27892	-0.72628	1.43534	-1.44527	0.855828	1.65954	1.13818	1.57843	1.08087	-1.44527	1.11169	0.0273332	0.587362	-1.44527	0.958492	0.904513	1.07076	1.47963	0.898745	-0.979026	-0.327645	0.653497	0.990556	0.919988	-0.887179	0.0996537	1.5552	0.928997	0.734727	0.785993	0.417815	0.434782	1.27724	-0.189748	0.804112	0.822189	1.09531	1.26559	-1.00199	0.115748	0.993009	1.18672	0.407864	0.828228	1.47502	1.22499	0.588172	-1.44527
NR1H4	1.2837	-3.8919	-0.0960878	-0.106059	-0.228577	0.658597	0.919877	0.644396	0.702399	-0.0823505	0.489035	-0.0918828	0.512693	-0.432625	-2.28561	0.11636	0.282163	0.377216	0.578934	-0.767627	0.715986	-0.133765	1.57362	-0.626813	-0.915327	1.6902	1.39599	-0.610004	-0.737158	0.222041	-1.43042	-0.502544	-0.0583834	-0.420097	-1.06104	-0.357365	-0.500812	-1.06515	0.738496	0.821311	-0.00902993	-1.48534	0.402189	0.43916	0.585539	0.657998	0.407592	0.913631	0.227305
ATP1B2	1.03437	1.43304	0.899247	1.75158	0.0937824	-0.169332	1.91539	1.89019	1.82203	0.000729011	-0.875516	1.38348	-0.473712	-0.396095	-0.875516	0.439183	0.94217	2.16352	1.80712	0.446471	0.247152	1.01632	-0.875516	1.17635	1.4918	0.924129	-0.875516	1.31567	1.77189	1.67018	0.0760118	-0.234043	-0.875516	1.11518	0.771487	1.20229	-0.875516	0.908283	1.58797	-0.875516	0.0315465	0.75818	1.07843	-0.875516	1.42452	1.16034	1.326	-0.875516	0.27205
YAP1	-1.06426	0.200798	0.889003	0.937943	-0.530032	0.477809	-2.43891	-1.7093	0.715516	0.863656	-2.43891	0.157642	-1.8933	0.483381	0.491258	0.418451	-0.875701	0.477165	-0.0340904	-2.43891	0.33894	0.584362	0.292552	0.833013	1.29283	0.883076	0.643424	0.846494	-0.752085	0.962932	0.14806	0.334422	0.141709	0.740208	-0.495005	0.248375	0.509976	1.26349	0.495159	0.286697	-0.00818909	1.15627	0.804718	1.19621	0.281298	-0.164544	-0.55155	0.644507	-2.43891
EFNA1	-0.63094	-0.63094	1.4467	1.47544	-0.63094	-0.63094	1.84466	-0.63094	1.37107	-0.63094	-0.125703	1.67085	1.40268	-0.63094	-0.63094	-0.63094	1.62446	1.34516	2.01335	-0.63094	-0.63094	-0.63094	-0.63094	-0.63094	-0.63094	-0.63094	-0.63094	2.07254	1.55493	1.93168	1.22788	-0.63094	-0.63094	-0.63094	-0.63094	1.23547	1.57279	-0.63094	2.26206	-0.63094	1.58656	2.53166	2.41511	2.00322	2.80715	-0.63094	1.7704	-0.164591	-0.63094
SNHG32	1.91947	1.00373	0.880984	1.04232	0.971329	0.353238	2.20875	0.926336	1.32095	0.647957	-0.164066	0.265227	0.324474	0.591076	0.0345753	-0.283062	0.858216	1.17696	0.723761	0.758211	0.6298	-0.0739692	0.011865	0.251062	0.978563	0.0805073	0.974233	1.10784	2.03474	1.01778	0.759988	0.0393	-0.477501	0.107627	-0.267536	0.233623	-0.616283	1.72186	1.14401	0.43421	1.64519	1.8637	2.1711	0.812294	2.16272	1.83659	2.06366	-0.13302	-0.13565
DHRS4L2	2.50212	2.15532	1.09134	1.41622	-0.777494	-0.777494	1.71417	-0.777494	1.54909	-0.777494	-0.777494	0.459651	0.828303	1.40665	2.21972	0.872276	2.21053	1.09774	0.92207	0.672355	1.20713	1.15548	-0.777494	-0.777494	2.288	1.13697	1.68341	1.4832	1.53513	1.63125	1.22462	0.770287	0.888756	1.34269	-0.777494	0.729588	-0.777494	2.24912	1.77643	0.468479	0.135772	-0.777494	0.87737	0.446277	-0.777494	-0.777494	2.00649	1.16863	-0.777494
HS6ST2	-0.387648	-0.387648	-0.387648	3.3195	1.58076	-0.387648	-0.387648	-0.387648	2.73369	-0.387648	-0.387648	-0.387648	-0.387648	2.05624	-0.387648	-0.387648	-0.387648	-0.387648	2.21318	-0.387648	-0.387648	-0.387648	-0.387648	-0.387648	-0.387648	-0.387648	-0.387648	-0.387648	1.30488	1.68844	1.87205	-0.387648	-0.387648	-0.387648	-0.387648	-0.387648	-0.387648	-0.387648	1.09823	0.469053	4.08823	-0.387648	3.88096	-0.387648	1.64541	-0.387648	2.45586	-0.387648	-0.387648
RAB34	0.902544	1.48798	1.02204	1.43952	0.753728	0.639655	1.47164	-0.861485	1.30506	-0.791578	-0.838042	1.03189	0.948418	0.488249	1.35061	0.684007	1.46751	1.49851	0.972983	0.622804	0.851166	0.569109	1.06021	-0.198557	1.42736	-1.36226	1.1941	1.15663	1.23001	1.60831	0.613849	0.325003	-1.36226	-1.36226	-0.201144	0.728488	0.391075	1.45209	1.04419	0.815023	1.22062	0.569104	1.51544	1.48176	1.5057	1.39848	1.42901	-0.150479	0.306439
MORN4	0.9226	-0.914155	1.14908	0.404678	2.02334	1.59433	0.462679	1.07643	0.246445	0.104518	-0.260269	1.09038	1.27656	-0.914155	1.34653	-0.914155	0.934204	0.51467	0.681955	0.526439	-0.914155	0.902042	-0.914155	-0.914155	-0.914155	1.59987	2.01817	0.997509	1.38116	0.426092	-0.914155	0.42334	1.08874	-0.0489787	-0.914155	-0.914155	1.49167	-0.914155	0.595833	-0.914155	-0.171486	-0.914155	-0.914155	-0.914155	-0.914155	2.30652	0.82213	-0.914155	-0.914155
ALOX5	-0.52388	1.29062	1.7167	-0.52388	-0.52388	0.468292	2.98954	0.231025	-0.52388	-0.52388	-0.52388	-0.52388	-0.52388	-0.52388	-0.52388	-0.52388	-0.52388	-0.52388	1.67025	-0.52388	1.05344	1.53914	-0.52388	0.804898	-0.52388	-0.52388	-0.52388	2.33148	2.31785	-0.52388	-0.52388	1.37946	-0.52388	-0.52388	0.635871	2.15753	0.577513	-0.52388	2.49329	-0.52388	2.12169	2.78799	2.157	-0.52388	-0.52388	-0.52388	-0.52388	-0.52388	2.20611
TUBA1A	0.851101	0.708942	1.32304	1.16327	1.16383	1.12908	1.62331	0.98445	1.02464	0.81396	-0.129935	1.24575	0.946829	1.25076	1.47143	-0.35912	1.45176	1.23982	0.792919	0.378133	0.731083	0.819846	0.190168	-0.0657504	1.4682	-1.04538	0.6213	1.13068	0.466415	1.28766	1.01424	0.295617	-1.41027	0.638286	1.06131	0.634877	0.377795	1.54057	1.39576	0.572875	1.20643	0.677393	1.76395	1.38815	1.33031	0.980649	1.41178	0.842003	-1.85763
CD74	-1.50828	0.708996	0.890288	0.274864	0.269258	0.502624	1.1749	0.498219	1.18012	-1.50828	0.251627	1.13408	0.942074	0.294901	0.429713	0.392866	0.863293	1.19057	1.22466	0.509449	-1.50828	0.628194	-0.113342	0.47491	1.33772	-1.50828	0.446028	1.49749	1.26416	0.882928	-0.0535821	-1.50828	-0.0529196	-1.50828	-0.219433	0.883556	0.671848	-1.50828	1.50963	-0.355953	1.43365	1.62378	1.76766	1.54757	1.80003	0.884968	1.25524	0.389214	0.644543
RIPOR1	0.83496	-0.837176	-0.837176	1.21336	-0.837176	1.24938	1.24571	-0.837176	1.55707	-0.837176	-0.837176	1.28996	0.861036	1.42969	0.154071	0.129532	1.49748	1.95501	0.615883	1.48931	-0.837176	0.768932	-0.837176	-0.125485	-0.837176	2.04205	-0.837176	0.759901	1.32722	1.61765	1.31768	0.839216	0.0827792	-0.837176	-0.837176	1.09551	-0.837176	-0.837176	1.10982	1.15926	0.122815	-0.837176	1.77846	-0.837176	-0.837176	0.868628	2.1958	0.538884	-0.837176
DHH	-0.291125	-0.291125	-0.291125	-0.291125	-0.291125	3.63475	3.83148	-0.291125	2.933	-0.291125	-0.291125	2.09363	-0.291125	-0.291125	-0.291125	-0.291125	1.11192	-0.291125	-0.291125	-0.291125	-0.291125	-0.291125	-0.291125	-0.291125	-0.291125	-0.291125	-0.291125	3.90447	-0.291125	-0.291125	-0.291125	-0.291125	-0.291125	-0.291125	-0.291125	-0.291125	-0.291125	-0.291125	-0.291125	-0.291125	4.26654	-0.291125	-0.291125	3.30636	4.32138	-0.291125	-0.291125	-0.291125	-0.291125
AC123912.4	-0.88208	-0.88208	0.873158	1.02458	-0.88208	-0.88208	1.66337	1.60609	1.5692	-0.88208	0.157243	1.82014	-0.88208	-0.88208	-0.88208	-0.542804	0.368362	1.48615	2.03916	-0.88208	-0.88208	0.691376	-0.458836	1.16969	1.0912	-0.88208	-0.88208	1.28953	1.34651	1.00784	-0.336328	-0.242494	-0.88208	0.0889063	1.11209	1.2718	1.39202	-0.88208	2.11946	-0.30808	1.93828	1.76325	2.09083	2.0876	2.006	1.11138	0.873198	-0.463862	0.450011
ITGA2	-0.659251	-0.659251	1.96386	-0.659251	-0.659251	-0.659251	-0.659251	-0.659251	1.71483	-0.659251	-0.659251	1.53501	-0.659251	-0.0427339	-0.659251	-0.659251	-0.659251	1.75545	1.95085	-0.659251	1.34628	-0.659251	1.76921	-0.659251	0.255168	-0.659251	-0.659251	1.65009	1.91151	0.720231	-0.659251	0.733028	1.13779	0.297774	-0.659251	-0.659251	1.04034	-0.659251	1.63808	-0.659251	2.17378	-0.659251	-0.659251	0.105961	-0.659251	2.14676	-0.659251	-0.659251	0.816475
TCEAL1	1.68451	0.585771	1.19538	1.09541	0.749723	0.864117	1.53641	0.790754	0.948646	-0.153102	0.271574	1.26256	0.843786	0.757572	0.49813	0.915515	1.28089	1.06931	0.741066	0.663016	0.465241	0.323707	1.14563	0.390627	1.56693	0.156796	0.724603	0.538469	-0.267167	0.97556	0.416027	0.352936	-0.122608	0.631872	0.422506	0.608792	-0.200033	1.5863	0.894267	0.860626	1.2079	-2.08851	1.5691	1.15041	0.707744	1.58317	1.466	0.552419	-2.08851
CAB39L	-0.836603	2.30574	-0.836603	-0.836603	0.927699	-0.836603	0.0408381	-0.836603	-0.836603	-0.836603	0.807255	1.60326	-0.836603	0.222286	0.659876	-0.836603	1.58529	1.68686	1.05006	1.31588	0.402334	-0.836603	-0.836603	-0.836603	-0.836603	1.54786	-0.836603	0.686382	0.29884	1.68536	0.312932	0.553297	-0.836603	-0.836603	1.12225	-0.836603	0.959205	-0.836603	1.87526	-0.836603	2.21396	2.19647	-0.836603	-0.836603	0.527288	-0.836603	-0.836603	0.285543	1.79811
ECRG4	2.37706	1.53611	0.420655	-0.495873	2.05783	1.01608	-0.495873	0.443681	1.78619	2.10975	-0.495873	-0.495873	-0.495873	-0.495873	-0.495873	-0.495873	0.846476	-0.495873	2.5392	-0.495873	-0.495873	-0.495873	-0.495873	-0.495873	-0.495873	-0.495873	-0.495873	2.6055	3.04094	-0.495873	-0.495873	-0.495873	-0.495873	2.40558	0.276478	-0.495873	-0.495873	-0.495873	1.23972	-0.495873	-0.495873	-0.495873	-0.495873	-0.495873	-0.495873	-0.495873	-0.495873	-0.495873	-0.495873
RPS17	2.36274	1.45342	0.656833	0.760532	-0.425503	-0.0921729	1.77616	1.18225	1.00579	0.967248	0.0750518	0.367124	0.222272	0.890735	-0.266028	0.0113501	1.00481	1.03207	0.318216	1.05516	0.312623	0.127244	0.55798	0.736152	1.39378	-0.278713	0.622656	0.438789	3.25692	0.957573	-0.848233	-0.756445	-0.853638	0.196733	-0.457398	-0.125851	-1.04282	2.47994	0.247578	0.0955479	1.64042	1.85365	2.04918	1.21778	2.27118	1.82957	2.36184	-0.629489	1.13703
MIR99AHG	1.9714	1.84886	1.09453	1.99049	-0.777211	0.310929	0.0257866	1.43076	1.36526	-0.100237	-0.777211	1.72033	1.54151	1.36883	-0.777211	1.35767	1.96728	1.47781	1.00425	0.996031	1.45403	0.548894	1.46368	-0.777211	0.317062	-0.777211	-0.777211	1.20823	0.261899	1.85803	0.722607	0.879465	0.00821686	-0.777211	-0.0362331	1.57633	1.11109	2.23729	1.51709	0.864301	1.71982	-0.777211	1.21423	0.776089	1.8087	2.31305	1.92134	-0.203218	-0.777211
ZNF559	1.0383	1.44365	0.751074	1.14301	0.132025	0.22578	-1.44151	-0.469601	0.468782	0.553081	0.0234179	0.45218	-2.36495	-0.00436719	0.71142	-0.148407	0.324868	0.533933	0.704017	-0.138747	0.330742	-2.36495	0.556585	-0.648186	0.361407	-0.572024	0.469687	-0.203241	0.484727	0.626175	-0.14355	0.269789	0.675557	-0.120453	0.00581049	0.470798	0.266214	0.46425	0.710896	-0.269051	1.41451	-0.697991	-2.36495	1.07524	-2.36495	0.98148	-2.36495	0.180698	-0.673495
COL6A1	1.12884	0.970591	1.08109	1.41228	0.895163	0.806837	1.21731	0.542738	1.58515	0.676436	0.0649258	1.00502	1.12496	1.11028	0.480365	1.39349	1.77447	1.37675	0.888017	0.646831	0.615505	0.346263	1.02502	-0.605178	0.418412	-1.85861	1.06813	0.83221	0.966923	1.55163	0.873512	0.31279	0.746677	0.469216	-0.575161	0.894525	0.705696	1.33142	1.12613	0.766311	1.22207	0.246007	1.23531	1.17467	0.906504	1.45516	1.48795	-0.3605	0.559355
HTRA1	0.517519	1.14535	1.43235	1.5267	0.871934	0.924049	1.3074	1.20807	1.29958	0.8126	-0.783606	0.852619	1.14535	0.988552	1.05248	1.25411	1.33893	1.18128	0.976455	0.76411	0.886958	0.58949	1.20932	-1.47633	1.14936	0.687397	1.17392	1.4583	0.62572	1.50855	0.328392	0.0434582	0.222147	0.223032	-1.47633	0.664337	0.333405	1.85729	1.18338	0.440694	1.30175	1.04555	1.44899	1.1265	1.18073	1.41366	1.38941	0.671874	0.205611
RPS27	2.10344	1.04158	0.815475	0.564253	-0.157749	-0.378772	1.80048	0.944722	1.28189	0.775556	-0.48681	0.23337	0.327609	0.577879	0.118068	0.444022	0.623926	1.54037	0.109375	1.11407	0.646714	-0.21422	0.510842	-0.216526	1.06698	-0.215682	1.13824	0.667028	3.14874	1.12005	-0.143261	-0.845516	-0.396487	0.924731	-0.611391	0.334235	-0.360836	2.69793	1.26914	1.08902	1.16307	1.47573	1.6227	0.746971	1.89726	1.67908	2.38372	-0.421817	0.839108
SMARCA1	1.93225	-0.824457	-0.198828	0.95858	-0.824457	0.207612	1.68127	-0.824457	1.62192	-0.824457	0.873282	1.4286	0.806502	1.73216	1.32494	1.00462	1.37176	0.825676	1.03962	-0.124944	0.399647	-0.824457	-0.824457	0.304437	2.1946	-0.824457	1.78407	1.13832	0.297391	1.31948	-0.0157873	1.09663	1.06943	0.517544	-0.824457	0.889392	-0.824457	2.63811	1.57295	-0.824457	1.85553	-0.824457	2.14341	2.29566	1.28871	1.6056	1.4541	0.0894095	-0.824457
BLVRB	1.31019	-1.66788	0.902708	0.863908	0.560491	0.690388	1.53556	0.925511	0.855432	0.822484	-1.66788	0.93968	-1.66788	0.246589	-0.773453	0.303874	0.652282	1.23858	0.994806	1.5428	0.474023	-0.0317593	0.856103	0.269766	1.05692	1.08431	-1.66788	0.879196	1.91443	0.433472	0.155282	-0.336359	0.000522304	0.47608	-0.164179	0.913419	0.774493	1.13549	0.817514	-0.166018	0.477776	-1.66788	0.802808	0.4739	-1.66788	1.13975	1.80332	0.61217	0.330631
NDN	0.857299	0.507209	1.07422	0.705417	0.647951	0.420767	0.805178	0.578507	0.645728	0.960055	-1.7786	0.687396	0.604531	1.07989	0.775645	0.651512	0.917802	1.23711	0.913051	0.923305	0.246951	0.316155	0.545558	0.751189	-0.0718816	0.518148	-1.7786	1.34171	0.246312	1.21749	0.991282	0.474054	0.458766	0.451865	0.604257	0.950822	0.581601	1.63011	1.06705	0.461511	0.927467	-1.7786	0.604106	0.579548	0.832999	1.1628	1.23219	-1.7786	-1.7786
CTSO	-0.674656	-0.674656	-0.674656	-0.674656	-0.674656	-0.674656	2.45629	0.595779	-0.674656	-0.674656	-0.674656	1.71342	1.76395	0.890807	-0.674656	-0.674656	2.28177	1.89137	1.25202	1.70223	-0.674656	1.81937	1.78895	-0.674656	0.645722	1.54353	-0.674656	-0.0186816	0.215553	2.06472	-0.674656	0.53948	0.644712	-0.674656	-0.674656	-0.674656	-0.674656	2.06358	1.8435	1.92741	0.177571	-0.674656	1.6433	1.75761	-0.674656	2.14601	1.00409	0.0179384	-0.674656
IFI44	3.19848	-0.457642	-0.457642	1.61049	-0.457642	-0.457642	2.83467	-0.457642	2.76373	-0.457642	-0.457642	-0.457642	2.16951	2.87859	2.34432	2.40153	1.86421	0.827169	2.15012	-0.457642	-0.457642	0.396791	-0.457642	-0.457642	-0.457642	-0.457642	-0.457642	1.47888	1.73575	0.617231	1.37763	1.40115	-0.457642	-0.457642	-0.457642	0.492076	-0.457642	-0.457642	1.74079	-0.457642	-0.457642	3.0437	3.23892	-0.457642	1.5564	-0.457642	-0.457642	-0.457642	-0.457642
PSMB9	-0.499479	-0.499479	1.3991	2.59853	2.01517	1.92227	2.40122	1.20529	2.25146	2.04833	-0.499479	1.10156	-0.499479	2.08098	2.32476	-0.499479	1.39233	0.715259	-0.499479	-0.499479	1.13102	-0.499479	-0.499479	-0.499479	2.67111	-0.499479	-0.499479	1.69214	2.81702	1.27487	1.0206	1.25794	-0.499479	-0.499479	-0.499479	-0.499479	1.42002	3.06407	2.13476	-0.499479	-0.499479	3.08699	-0.499479	-0.499479	-0.499479	2.26972	1.06627	-0.499479	-0.499479
EFS	-0.437291	-0.437291	-0.437291	2.6926	-0.437291	-0.437291	-0.437291	1.91495	2.48523	-0.437291	-0.437291	-0.437291	2.35479	-0.437291	-0.437291	0.191254	3.10082	3.06804	1.1477	-0.437291	-0.437291	-0.437291	-0.437291	-0.437291	-0.437291	1.91567	-0.437291	1.53474	2.33975	2.79874	-0.437291	-0.437291	1.97602	-0.437291	1.80625	0.485376	-0.437291	-0.437291	3.12541	-0.437291	-0.437291	-0.437291	-0.437291	-0.437291	-0.437291	3.52738	2.46895	-0.437291	-0.437291
ZBTB4	1.43494	0.511381	-1.10239	1.03094	0.680089	-1.10239	-0.0032091	1.47068	1.34293	-1.10239	-1.10239	0.624706	1.11652	0.0906612	0.678155	0.50219	0.856294	1.45143	1.15534	-1.10239	0.95967	-1.10239	-0.528866	-1.10239	-1.10239	-1.10239	0.776649	0.945142	1.6153	0.919742	1.28131	0.0794311	-0.326923	-1.10239	-1.10239	1.14579	0.0672432	2.05061	1.57892	0.754585	0.494391	-1.10239	1.61172	-1.10239	-1.10239	1.30197	1.09857	0.798709	-0.171485
LIN7A	-0.4604	-0.4604	-0.4604	1.19648	-0.4604	-0.4604	-0.4604	0.512237	3.08454	-0.4604	-0.4604	2.4851	-0.4604	-0.4604	-0.4604	1.19306	-0.4604	-0.4604	0.670325	-0.4604	-0.4604	2.28669	-0.4604	-0.4604	-0.4604	-0.4604	-0.4604	1.69607	0.747555	-0.4604	-0.4604	0.297947	-0.4604	-0.4604	-0.4604	1.44793	-0.4604	-0.4604	0.569335	-0.4604	2.18761	2.34144	-0.4604	-0.4604	-0.4604	-0.4604	-0.4604	-0.4604	2.18828
DTX3	2.07536	1.12337	1.20017	1.59925	-0.745767	-0.745767	1.17231	-0.745767	1.63872	-0.745767	0.963785	1.52094	-0.745767	1.88941	1.67422	1.5301	1.16778	1.82468	1.47551	1.21268	0.924831	0.955326	1.49241	-0.745767	-0.745767	-0.745767	-0.745767	1.12564	1.25	1.6139	0.0437134	0.537533	-0.745767	-0.745767	-0.745767	1.41421	-0.745767	-0.745767	1.78618	0.483502	-0.745767	1.83222	1.90108	-0.745767	1.6069	1.97581	0.750004	-0.745767	-0.745767
TRIM22	2.15957	-0.590585	-0.590585	2.90983	2.15068	-0.590585	-0.590585	-0.590585	2.24359	-0.590585	-0.590585	0.527898	1.5948	0.0290513	-0.590585	1.61137	0.0826021	2.31395	1.91922	-0.590585	0.734881	-0.590585	-0.590585	-0.590585	2.00125	-0.590585	1.63428	0.563384	-0.590585	2.81178	1.31972	1.34611	-0.590585	0.580131	0.476295	-0.590585	-0.590585	-0.590585	1.59889	-0.590585	-0.590585	-0.590585	2.16855	1.68862	2.16603	2.00291	-0.590585	-0.590585	-0.590585
NAAA	-0.434963	-0.434963	-0.434963	3.19223	-0.434963	-0.434963	-0.434963	-0.434963	1.89192	-0.434963	-0.434963	-0.434963	0.613053	-0.434963	-0.434963	-0.434963	2.25424	2.98521	1.36141	-0.434963	0.411372	-0.434963	-0.434963	-0.434963	1.75689	-0.434963	-0.434963	2.5649	1.44926	-0.434963	-0.434963	-0.434963	-0.434963	-0.434963	-0.434963	-0.434963	-0.434963	-0.434963	2.89949	-0.434963	1.60611	0.97877	-0.434963	-0.434963	-0.434963	3.14128	-0.434963	-0.434963	-0.434963
THEM4	1.86486	1.39904	-0.980864	-0.980864	-0.306851	-0.980864	1.20854	-0.980864	-0.278842	-0.980864	0.760423	-0.504732	-0.0383203	1.2203	-0.980864	1.2792	-0.980864	0.0430931	1.09745	-0.980864	-0.980864	-0.980864	-0.980864	0.176987	2.17965	0.0727262	1.25689	1.41898	0.664266	0.76775	-0.980864	0.133345	-0.980864	-0.980864	-0.440128	1.08692	-0.980864	-0.980864	1.54027	0.449161	0.129604	2.16841	1.76502	0.274522	0.0424415	1.13816	-0.0139135	0.305949	-0.980864
B3GNT7	-0.609597	1.7965	-0.609597	1.70286	-0.609597	-0.609597	2.39989	0.239558	1.05274	-0.609597	-0.609597	-0.609597	1.32828	-0.609597	-0.609597	-0.609597	-0.609597	1.78877	1.91894	1.94478	-0.0700309	-0.609597	-0.609597	1.69005	-0.609597	-0.609597	-0.609597	1.8985	1.54607	2.01592	0.743498	-0.609597	-0.609597	-0.609597	-0.609597	1.73564	2.06978	2.95798	2.10446	-0.609597	-0.609597	-0.609597	1.39348	-0.609597	-0.609597	1.58571	2.29966	-0.609597	-0.609597
TTC30A	-0.636836	2.31765	-0.636836	-0.636836	-0.636836	-0.636836	-0.636836	-0.636836	1.50234	-0.636836	-0.636836	-0.636836	-0.636836	-0.636836	1.84876	1.54699	1.69651	1.65808	0.108419	-0.636836	-0.636836	-0.636836	-0.636836	-0.636836	-0.636836	-0.636836	-0.636836	-0.636836	-0.636836	1.76938	1.03408	0.310449	-0.636836	-0.636836	-0.636836	-0.636836	-0.636836	-0.636836	-0.636836	-0.636836	0.651054	-0.636836	-0.636836	-0.636836	-0.636836	-0.636836	-0.636836	-0.636836	-0.636836
ALDOC	-1.27823	-1.27823	-1.27823	0.755252	0.368234	0.281229	-0.0676935	-1.27823	0.667002	0.999608	1.29044	1.16731	-1.27823	0.921022	0.422326	-0.89031	0.658766	1.18337	1.14635	0.389503	0.876501	0.762183	-1.27823	1.06031	1.57055	1.1497	1.07596	0.857247	1.08296	0.198791	1.01501	0.323997	0.87093	0.89153	0.577544	0.344996	0.0457388	-1.27823	1.13435	-0.840061	0.627147	0.892923	-1.27823	0.889769	0.293821	-0.581083	-1.27823	-0.800048	-1.27823
TST	2.31059	-0.422606	2.91051	-0.422606	-0.422606	-0.422606	-0.422606	-0.422606	3.4153	-0.422606	-0.422606	-0.422606	-0.422606	0.698094	-0.422606	-0.422606	1.61308	2.81702	1.93172	1.6434	2.3335	-0.422606	1.04167	-0.422606	-0.422606	-0.422606	-0.422606	2.38389	3.0568	2.24866	-0.422606	-0.422606	2.05704	-0.422606	-0.422606	-0.422606	-0.422606	-0.422606	2.68786	-0.422606	-0.422606	-0.422606	1.67264	-0.422606	-0.422606	-0.422606	1.91148	-0.422606	2.61406
IGFBP2	3.07889	0.718285	1.46459	0.955591	0.366801	0.350997	1.9679	0.597434	1.56114	0.765925	-1.07399	1.20614	0.707566	0.748141	0.323108	0.65678	1.66852	1.35727	0.846553	0.816739	0.0177227	0.73442	0.128627	1.17019	1.22403	0.295693	0.622443	2.29269	2.41069	1.05427	0.115566	-0.335663	0.00200058	0.815254	-0.526893	0.545045	1.04091	3.39346	2.08112	-2.17452	0.912434	1.23948	0.586821	0.713916	1.66461	1.25657	1.42859	0.422622	0.0431065
CA11	1.92039	0.292831	1.04465	1.79054	-0.754841	-0.754841	2.52835	-0.754841	1.63816	-0.754841	-0.754841	1.03905	-0.754841	-0.754841	-0.754841	1.48183	1.45273	1.74179	0.905111	1.07137	1.52269	1.20747	1.73174	-0.0400764	1.84889	1.12529	1.86057	1.58442	1.34378	1.93236	1.28588	-0.754841	-0.251026	1.71779	0.626173	1.32489	-0.754841	-0.754841	2.07128	-0.754841	-0.754841	-0.754841	-0.754841	-0.122349	0.133618	2.17618	-0.754841	-0.754841	-0.754841
MIDN	-1.1696	-0.452053	0.801245	-0.653563	0.406796	0.00748384	1.66678	-1.1696	1.36358	-1.1696	-1.1696	0.458497	-0.0986572	0.300929	-0.63698	0.598611	0.650365	1.78059	0.691375	1.05998	0.764794	0.414946	0.657226	-1.1696	-1.1696	1.2136	1.98887	0.955417	0.926406	1.66442	0.918269	0.462809	-0.068944	-0.660907	0.387944	1.05099	0.170904	1.81993	1.71338	0.336307	1.35963	1.78873	1.71018	-0.566063	1.25656	0.725357	-0.0761426	-1.1696	0.179731
ARMCX3	1.63394	1.99477	-0.666771	1.37704	-0.666771	-0.666771	2.72421	1.8372	1.62777	0.0582553	-0.666771	1.41517	-0.191006	1.32398	-0.666771	1.1119	1.74267	1.76837	1.68686	-0.666771	1.57003	-0.666771	1.56927	-0.666771	-0.666771	0.352246	-0.666771	0.961872	-0.666771	2.08771	1.08332	0.766021	-0.105532	-0.666771	1.67558	-0.666771	-0.666771	-0.666771	1.44854	0.798103	2.09393	2.49132	2.40262	-0.666771	-0.666771	0.566271	-0.666771	-0.666771	0.692031
FOXP2	-0.343189	-0.343189	-0.343189	-0.343189	-0.343189	-0.343189	-0.343189	-0.343189	3.81393	0.956641	4.13726	-0.343189	-0.343189	-0.343189	-0.343189	-0.343189	-0.343189	-0.343189	-0.343189	-0.343189	-0.343189	-0.343189	-0.343189	-0.343189	-0.343189	-0.343189	-0.343189	2.01411	2.29385	3.88273	-0.343189	0.546117	-0.343189	-0.343189	-0.343189	-0.343189	-0.343189	-0.343189	2.91581	1.96573	-0.343189	-0.343189	-0.343189	-0.343189	2.05338	-0.343189	-0.343189	-0.343189	-0.343189
IL6ST	0.903409	0.883547	0.520376	-0.678964	-0.365434	0.562529	0.571526	0.246069	0.500658	-0.0814619	0.76457	0.348462	0.490478	0.041732	0.933737	-0.306515	-0.317585	1.06553	0.666334	-1.01249	-0.413374	-0.613066	0.0723343	1.18536	-3.63637	0.58413	0.617801	-0.100559	0.293378	1.1119	0.910275	-0.0712041	0.608706	1.0353	0.581855	0.701567	0.238138	1.02843	1.07898	0.577425	1.44184	1.77678	2.21767	0.766444	-0.0230071	1.51753	-0.268463	0.105215	-0.406862
PROCR	1.13187	-1.04449	-1.04449	0.850381	-1.04449	-1.04449	1.83323	1.23318	1.721	-1.04449	-1.04449	-1.04449	-1.04449	0.318385	-1.04449	0.468818	1.27511	1.15577	1.23916	-0.0611898	-1.04449	-1.04449	-0.535076	-1.04449	-1.04449	-0.463776	-1.04449	1.41609	1.25326	1.10103	0.882796	0.798121	1.03372	-1.04449	1.13234	0.629997	0.439957	-1.04449	1.34401	0.213682	1.24786	0.0500747	0.849981	1.29834	1.81058	0.447884	1.28096	-1.04449	0.55881
SNHG7	0.682159	1.04049	0.727579	0.637551	0.910973	0.0353043	1.16993	0.959539	1.01577	0.909207	0.682483	0.862867	0.789482	0.51626	0.128009	0.138379	1.4351	0.729624	0.332931	0.566479	0.521204	-0.00903252	0.427225	0.401838	1.27178	0.366725	0.885259	1.0835	2.90349	0.954106	0.534213	-0.32001	-0.230988	0.619985	-0.0789725	0.990929	0.433606	2.04643	1.47793	0.135238	0.16823	1.12702	0.857264	-1.17799	1.13518	1.45152	2.06496	-0.656868	-0.924171
AL590434.1	-0.299598	4.72994	-0.299598	-0.299598	-0.299598	-0.299598	2.14108	-0.299598	2.42256	-0.299598	-0.299598	-0.299598	3.93444	-0.299598	-0.299598	-0.299598	-0.299598	-0.299598	-0.299598	-0.299598	-0.299598	-0.299598	-0.299598	-0.299598	2.09937	-0.299598	-0.299598	3.15221	1.3178	-0.299598	-0.299598	-0.299598	-0.299598	-0.299598	-0.299598	-0.299598	-0.299598	-0.299598	4.32972	-0.299598	-0.299598	-0.299598	-0.299598	-0.299598	-0.299598	-0.299598	1.61479	-0.299598	-0.299598
AC010136.1	3.4466	-0.355709	-0.355709	-0.355709	3.74468	-0.355709	-0.355709	1.36422	2.00128	-0.355709	-0.355709	-0.355709	-0.355709	-0.355709	-0.355709	0.404944	-0.355709	3.68234	3.10685	-0.355709	-0.355709	-0.355709	-0.355709	-0.355709	-0.355709	-0.355709	1.60176	2.55902	3.00501	1.58167	-0.355709	-0.355709	-0.355709	-0.355709	-0.355709	-0.355709	-0.355709	-0.355709	3.09373	-0.355709	-0.355709	-0.355709	2.65014	-0.355709	-0.355709	-0.355709	-0.355709	-0.355709	1.1845
DOK4	-0.713067	-0.713067	1.99813	2.20844	-0.713067	-0.713067	-0.713067	-0.713067	1.33997	0.591608	-0.713067	1.3999	-0.713067	1.37175	-0.713067	1.72854	1.75143	2.16115	-0.713067	-0.713067	1.36678	-0.713067	-0.713067	-0.713067	-0.713067	0.243979	-0.713067	1.28398	0.95461	1.21356	-0.713067	1.04841	-0.713067	-0.713067	-0.713067	-0.713067	-0.713067	-0.713067	0.731356	1.80287	0.834228	-0.713067	-0.713067	-0.713067	-0.713067	-0.713067	-0.713067	-0.713067	1.34067
GJA1	-0.626147	0.629571	1.34336	1.64019	1.95924	-0.626147	-0.626147	-0.626147	1.88416	-0.626147	-0.626147	1.05754	1.26154	1.64191	0.854133	1.91347	2.00996	0.993821	-0.626147	-0.626147	0.587025	-0.626147	-0.626147	1.48662	-0.626147	-0.626147	2.07383	0.469195	0.09495	2.11536	1.00843	-0.626147	-0.626147	-0.0841753	0.829916	1.579	1.5272	-0.626147	0.265481	1.46511	2.60872	2.28616	2.50077	2.4304	2.25605	-0.626147	-0.626147	-0.626147	-0.626147
DENND6A	2.13537	-0.629397	-0.629397	-0.629397	-0.629397	-0.629397	-0.629397	-0.629397	-0.629397	-0.629397	-0.629397	1.00736	-0.629397	1.2257	-0.629397	-0.629397	-0.629397	-0.629397	1.83941	-0.629397	1.38339	1.76964	-0.629397	-0.629397	-0.629397	-0.629397	-0.629397	0.147941	1.3344	1.1931	1.94872	1.91491	0.934072	-0.629397	1.34008	1.64044	-0.629397	-0.629397	1.13661	-0.629397	2.25257	-0.629397	0.733224	-0.629397	-0.629397	1.01684	-0.629397	0.191336	-0.629397
MSANTD4	-0.968151	-0.968151	1.43278	-0.968151	1.5025	-0.968151	-0.968151	-0.968151	0.80776	-0.968151	-0.968151	0.686019	0.710827	-0.968151	1.0738	-0.968151	-0.385076	-0.968151	1.08584	-0.968151	0.525323	0.675623	-0.968151	-0.968151	-0.968151	0.84716	-0.968151	1.01732	-0.968151	1.08541	1.14751	0.634721	0.69096	-0.968151	0.875602	0.466157	1.13784	-0.968151	0.846528	-0.968151	-0.968151	-0.0324657	-0.968151	-0.968151	-0.968151	1.56159	-0.968151	0.0716666	-0.968151
SYT11	-0.558708	-0.558708	-0.558708	2.48115	1.31046	-0.558708	0.50695	-0.558708	2.07199	-0.558708	-0.558708	-0.558708	-0.558708	-0.558708	2.68739	0.386664	2.81528	2.35376	1.18561	1.65626	-0.558708	1.99367	-0.558708	-0.558708	0.893502	-0.558708	-0.558708	1.0706	1.53632	1.53697	1.9413	1.68417	-0.558708	-0.558708	-0.558708	0.348421	-0.558708	2.54761	1.45062	-0.558708	-0.558708	-0.558708	-0.558708	-0.558708	1.36502	-0.558708	-0.558708	-0.558708	-0.558708
FOS	1.38354	0.35958	1.26215	1.68882	1.51886	1.19511	1.46889	-0.0816986	1.44931	0.417068	0.0664331	0.35542	0.321516	0.422259	-0.241138	-0.960202	0.474105	1.35848	-0.0387066	-0.699001	0.284381	-0.0147168	0.402927	0.0328575	-0.272484	0.30288	0.542111	0.941639	0.628055	1.64186	0.899289	0.335242	-0.355443	0.884766	0.439187	1.06206	0.274319	1.67842	1.75953	1.5029	1.89751	2.02538	2.35331	2.17508	2.41444	1.36506	1.31076	-1.79428	0.357673
PLA2G5	-0.752285	1.29131	1.30321	-0.752285	-0.752285	2.02494	1.07072	1.59794	1.46733	1.60167	1.33786	2.02939	0.733667	0.819477	-0.752285	0.714851	1.58727	1.394	1.68469	2.15347	1.63233	0.948343	1.54023	-0.752285	0.0712705	-0.752285	1.59036	0.627436	1.59027	1.25424	1.47132	0.167276	-0.752285	-0.752285	-0.752285	0.468674	-0.752285	-0.752285	0.203342	-0.752285	0.859171	-0.752285	0.588399	-0.752285	1.22449	0.660922	1.68494	1.16454	-0.752285
EFHD2	0.769594	0.21598	0.345173	0.168153	0.607946	0.323927	0.849656	-0.647212	0.0460109	0.050181	-0.741291	0.235064	0.784753	-1.02403	0.260438	0.31829	-0.619845	0.352716	0.507089	0.575169	0.788524	0.0221692	0.73038	0.557772	-0.563108	0.271407	1.65798	0.930535	0.901053	0.840375	0.765532	0.389128	-0.365076	-0.803391	-0.199666	0.550904	0.693682	0.527743	0.875456	0.179296	-0.388197	-3.58913	0.334509	0.777099	-3.58913	-0.778521	0.324044	0.614133	-0.0670323
ZNF275	1.9115	1.4315	0.209666	0.599997	-1.18353	-1.18353	-1.18353	-1.18353	1.8726	0.958699	0.751674	1.19942	0.122693	0.247568	1.05827	0.867321	0.957543	0.286849	0.940791	0.785765	1.20566	0.556273	-0.648617	-1.18353	-1.18353	-1.18353	-1.18353	0.937362	1.45653	1.07797	1.07318	0.547134	0.659018	1.34819	0.746364	0.89404	0.663627	2.0414	1.53296	-1.18353	1.37151	0.286188	1.21031	1.30964	1.17832	1.18546	0.0976277	-1.18353	0.170897
OBSL1	1.24376	-1.18689	1.48138	1.47052	0.207919	-0.530373	2.17166	0.152532	1.83414	1.0059	1.66377	0.977344	0.717859	0.492768	0.699898	1.01522	1.4281	0.968268	0.544573	0.118503	0.358075	-0.302302	1.07839	0.505084	-0.984525	0.509606	1.24407	1.04228	2.07629	1.46864	-0.360396	0.249926	0.181267	-0.921956	0.319344	0.232467	-0.155767	1.27858	1.96026	-0.21585	0.0303711	2.12909	0.491557	-0.591553	-1.26542	1.61277	1.48182	-1.21809	-0.0926395
RHOC	-0.135048	-1.68093	-0.376248	0.617656	-0.112923	-0.0678267	2.29087	0.373662	1.2982	-0.357892	0.82092	0.339582	-0.30522	0.649727	0.0602823	0.802427	-0.532102	2.0751	1.14867	1.36775	0.305608	-1.04123	0.445112	1.51003	-0.254463	0.130068	0.262851	1.51941	2.37905	1.15885	-0.222022	0.306278	0.300987	1.67739	0.105734	-0.451898	0.946037	0.325763	1.33154	-0.885856	0.580505	1.04767	1.62566	1.29317	0.494435	0.210683	1.1152	1.04273	-2.05188
CARF	-0.545698	0.838407	-0.545698	-0.545698	-0.545698	-0.545698	2.57307	-0.545698	1.79283	-0.545698	-0.545698	-0.545698	-0.545698	-0.545698	-0.545698	1.15853	-0.545698	-0.545698	0.704931	-0.545698	-0.545698	-0.545698	-0.545698	-0.545698	-0.545698	2.83125	2.37953	-0.545698	-0.545698	-0.545698	1.21638	1.15352	-0.545698	-0.545698	-0.545698	1.97533	-0.545698	-0.545698	-0.545698	-0.545698	-0.545698	2.96111	-0.545698	-0.545698	-0.545698	-0.545698	-0.545698	-0.545698	-0.545698
PKIA	-1.68339	-1.68339	-0.327337	0.746969	-1.68339	-0.604739	0.110708	0.427044	-1.05493	0.476578	0.845184	0.385305	0.250094	1.12182	-1.10787	-1.68339	0.496379	0.638973	-0.178701	-0.756838	-0.452995	0.284676	0.363883	0.82678	-1.68339	1.46456	1.0133	0.234902	0.804285	0.751066	-1.68339	0.26329	-0.205036	-0.690674	-0.778723	0.317969	-0.509062	-0.0868959	-0.182522	0.257523	0.465883	-1.68339	0.972658	-0.559558	-1.68339	-0.853859	-1.68339	-0.531424	0.278864
ENDOD1	0.577254	-0.0700497	-0.500672	-0.790586	-1.35177	0.838185	0.881572	-1.35177	1.47202	1.43349	-1.35177	1.28251	0.755342	0.653814	1.21021	0.305097	-0.1899	1.36478	1.56454	-1.35177	-0.35437	1.05302	0.273608	-1.35177	1.33804	-1.35177	-1.35177	1.33016	1.90515	1.6365	0.639856	0.697012	0.744418	-0.798573	1.30845	1.12256	0.930808	-0.092817	1.71856	1.16935	0.929971	1.08751	0.273716	-0.695432	0.968374	-0.00590282	0.753757	-0.779128	-1.35177
PPFIBP1	1.1697	1.24731	0.69755	-0.140069	2.27257e-05	-0.077895	0.891928	0.886096	0.948419	-1.31467	0.050304	0.22594	0.535257	0.649736	0.205779	0.416923	0.673165	0.810523	0.654903	-0.971147	-0.422915	-0.892874	0.551794	-2.45822	0.647748	-1.67656	0.640598	1.13249	0.466815	0.97728	0.168224	-0.879031	0.501027	0.446118	0.585801	0.819807	0.473459	1.66636	1.31211	0.761975	1.49991	1.40566	1.30113	-0.717273	1.54126	0.85625	0.744579	0.493381	0.132273
NOTCH3	1.73554	-0.578011	2.22381	1.91567	-0.578011	-0.578011	1.3287	-0.578011	1.28942	-0.578011	-0.578011	2.2197	-0.0912832	1.4258	-0.578011	1.90069	-0.578011	1.23795	1.42844	-0.578011	1.03806	-0.578011	0.358557	-0.578011	-0.578011	-0.578011	-0.578011	2.38163	2.44854	1.64413	0.574629	-0.578011	1.05601	-0.578011	-0.578011	-0.578011	1.72561	-0.578011	2.14118	-0.578011	0.520766	3.39993	3.27643	-0.578011	2.29892	0.338867	-0.578011	-0.578011	-0.578011
SEMA4D	1.26417	0.35252	0.180542	0.0449247	-0.223417	0.310001	-0.273495	-0.232996	0.584243	-0.695601	0.613716	-0.0620072	-1.53039	0.392041	-0.351406	0.0799828	-1.41222	-0.0647873	0.266327	-1.24414	-0.534058	-1.39478	0.449707	0.574176	0.473041	0.538185	0.655361	-0.574849	0.684376	-0.021867	-0.269069	0.730608	0.73065	0.20009	-1.5711	-1.14294	-0.605534	-0.137021	0.590335	0.306865	-0.237888	0.349858	-2.36682	-3.4971	-0.700301	0.0272086	0.297015	0.839452	0.784145
GPX3	-0.0636138	-0.041998	0.821052	0.362904	1.23585	0.725166	0.972611	0.431393	0.795493	0.391198	0.121272	1.58285	0.415908	0.411987	0.487672	0.415083	0.816519	0.807946	1.19377	0.31623	0.475821	1.22813	0.664019	0.452438	1.28483	0.599612	1.11791	1.4325	0.950633	0.716419	0.478089	0.0530361	-0.517692	-0.0814299	-0.0281624	0.401271	0.640557	1.99079	1.62915	0.849634	0.686528	1.5428	2.29	1.48355	1.74344	1.338	1.57191	-0.232058	-0.651062
PTGER4	-0.45041	-0.45041	-0.45041	-0.45041	-0.45041	-0.45041	-0.45041	-0.45041	-0.45041	-0.45041	-0.45041	2.222	-0.45041	-0.45041	-0.45041	-0.45041	-0.45041	-0.45041	2.12102	-0.45041	-0.45041	-0.45041	-0.45041	-0.45041	-0.45041	-0.45041	-0.45041	-0.45041	-0.45041	-0.45041	1.87427	0.980675	1.85469	-0.45041	2.43821	1.83425	1.33364	-0.45041	2.2403	-0.45041	-0.45041	-0.45041	-0.45041	-0.45041	1.8784	-0.45041	-0.45041	-0.45041	-0.45041
ZKSCAN1	1.28472	0.871645	1.72756	-0.975888	1.56419	1.24835	1.864	1.70488	1.67328	-0.975888	-0.975888	1.73783	-0.975888	0.578171	0.349151	0.842253	1.41759	1.22677	0.96812	-0.975888	0.551838	-0.338934	0.929877	-0.975888	-0.975888	-0.975888	1.40956	1.08055	1.47935	1.00803	-0.46344	0.0663194	0.969097	-0.975888	0.663441	1.11528	-0.975888	-0.975888	1.25915	0.0221651	1.07398	-0.0187428	1.7385	-0.975888	-0.975888	-0.975888	1.36873	-0.975888	0.338229
POGLUT3	-0.483594	2.63092	-0.483594	1.20478	-0.483594	-0.483594	-0.483594	-0.483594	2.43555	-0.483594	-0.483594	1.92219	-0.483594	0.683939	-0.483594	-0.483594	2.21504	1.95714	2.78755	-0.483594	1.58936	-0.483594	-0.483594	-0.483594	-0.483594	1.69673	-0.483594	1.45596	2.43458	2.12728	0.244988	-0.483594	1.62493	-0.483594	-0.483594	-0.483594	-0.483594	-0.483594	2.3779	0.290945	3.75348	-0.483594	2.22612	1.18593	1.35448	-0.483594	-0.483594	-0.483594	-0.483594
WNT2B	0.518501	-0.664679	-0.0520881	1.32094	1.51075	-0.664679	-0.664679	-0.664679	-0.664679	-0.664679	2.13359	0.2137	-0.664679	1.38598	-0.664679	1.19096	0.423485	1.73896	1.98219	-0.664679	1.99616	-0.664679	-0.664679	-0.664679	1.53781	1.43866	-0.664679	1.50565	1.79768	2.07736	0.864434	-0.664679	-0.110701	-0.664679	-0.664679	0.567429	0.798091	2.63288	2.08556	-0.664679	2.12282	-0.664679	-0.664679	-0.664679	2.0904	1.74699	-0.664679	-0.664679	-0.664679
OAS1	0.554541	0.521664	0.266415	2.59678	2.65517	0.191825	3.25509	-0.463394	2.10718	-0.463394	-0.463394	1.70607	-0.463394	2.61261	-0.463394	-0.463394	2.66329	1.86504	0.406349	-0.463394	2.56457	1.87044	1.35931	-0.463394	2.11107	-0.463394	-0.463394	1.37652	1.08774	2.51579	-0.463394	-0.463394	-0.463394	-0.463394	-0.463394	-0.463394	-0.463394	-0.463394	0.918616	-0.463394	-0.463394	-0.463394	-0.463394	-0.463394	-0.463394	-0.463394	-0.463394	-0.463394	-0.463394
CDA	-0.191266	-1.90489	1.13076	-0.271199	-0.74801	-0.65972	-1.90489	0.971089	-0.14442	1.07555	0.974313	0.0844207	0.165417	0.241385	-1.90489	0.342829	0.71274	0.253972	-0.192843	0.911454	0.700322	-0.0591255	0.814627	0.160791	-1.90489	0.544304	0.48282	0.580584	1.25624	-0.897216	-0.282973	0.870384	0.423876	1.15097	1.10624	0.582229	0.0866974	1.58334	0.42954	1.25498	0.764949	-1.90489	-1.90489	0.286786	-0.701169	-1.90489	-1.90489	1.40299	1.8619
CFHR1	-0.399572	-0.399572	-0.399572	-0.399572	-0.399572	3.27162	2.9806	-0.399572	2.0671	-0.399572	-0.399572	-0.399572	-0.399572	1.48405	-0.399572	2.16785	2.79111	-0.399572	0.78105	2.34991	-0.399572	-0.399572	-0.399572	2.4473	-0.399572	-0.399572	-0.399572	0.984369	2.65799	-0.399572	-0.399572	-0.399572	-0.399572	-0.399572	-0.399572	-0.399572	-0.399572	-0.399572	2.18882	-0.399572	-0.399572	-0.399572	-0.399572	-0.399572	-0.399572	-0.399572	-0.399572	2.72858	1.76943
SIGLEC11	1.40184	1.6069	-0.722496	1.99169	1.27493	-0.223497	1.66939	2.08174	1.7607	-0.722496	-0.722496	1.33008	-0.722496	-0.214112	0.665215	0.620794	1.41957	0.580805	0.808997	1.32865	-0.722496	1.18174	1.18745	-0.722496	-0.722496	-0.722496	-0.722496	1.24665	-0.722496	1.61496	1.13022	0.832351	1.23725	-0.722496	1.04977	0.724551	-0.722496	2.61341	2.11181	-0.722496	-0.722496	-0.722496	2.02634	-0.722496	-0.722496	1.21449	1.509	1.59166	1.10862
LARP6	1.08832	1.33316	1.85899	-1.20396	1.21953	-1.20396	1.62996	-1.20396	-1.20396	0.776123	0.658285	-0.122981	0.937851	1.3826	-1.20396	1.08196	0.451886	1.60004	-1.20396	0.95408	0.837962	-0.289577	1.01117	-1.20396	-1.20396	-1.20396	1.51048	1.22369	0.995196	-0.41416	0.893107	1.13504	0.7919	0.470015	-1.20396	0.785242	0.116367	2.04201	1.13832	0.321548	-0.180141	-1.20396	1.61892	-1.20396	0.0703195	1.51956	1.99762	1.31691	-1.20396
CCNJL	-0.32472	-0.32472	-0.32472	-0.32472	-0.32472	-0.32472	1.6296	-0.32472	-0.32472	-0.32472	-0.32472	0.845636	-0.32472	-0.32472	-0.32472	-0.32472	-0.32472	-0.32472	2.80251	-0.32472	-0.32472	-0.32472	-0.32472	-0.32472	4.49046	-0.32472	-0.32472	2.8075	3.28677	2.04638	2.54384	-0.32472	-0.32472	2.14963	-0.32472	3.09566	-0.32472	-0.32472	2.55921	-0.32472	-0.32472	-0.32472	2.90541	-0.32472	4.62172	-0.32472	-0.32472	-0.32472	-0.32472
TBCK	-1.59166	-1.59166	-0.222354	1.18663	0.138608	1.30306	-1.59166	-1.59166	0.70427	-0.0827665	0.856087	-0.0970879	-0.433235	0.743736	-0.481992	-1.59166	0.6609	0.119466	0.464757	0.482836	-0.998822	0.845394	0.645739	1.25049	1.24267	-1.59166	-1.59166	-0.390725	0.00044668	0.868491	-0.788982	0.446333	0.32426	1.29307	-1.59166	0.911031	-0.205745	-1.59166	0.644768	1.42871	1.34323	0.118697	0.669076	1.69137	0.824128	0.459063	-1.59166	0.967831	1.02327
MAGED2	0.917663	0.922402	0.555418	1.13243	0.760519	0.533501	1.07222	0.661609	1.16139	-2.03355	-0.349437	0.920028	0.703993	0.86735	0.969496	0.658067	1.36792	1.21072	0.801316	0.206562	0.736876	0.670194	0.177254	0.537008	0.755592	-1.28276	-0.0374466	1.71329	0.513939	1.5492	0.568723	-0.209922	0.168706	0.428545	0.0875197	0.831964	0.430641	1.42758	1.49802	-0.307513	0.860156	0.701695	1.13485	1.05426	0.94618	1.58413	1.21827	0.518362	0.0346592
AC079140.6	-0.339078	-0.339078	-0.339078	-0.339078	-0.339078	-0.339078	-0.339078	-0.339078	0.874352	-0.339078	4.29366	-0.339078	-0.339078	-0.339078	-0.339078	0.552157	-0.339078	3.68392	-0.339078	-0.339078	-0.339078	-0.339078	-0.339078	-0.339078	-0.339078	-0.339078	-0.339078	1.21034	-0.339078	-0.339078	-0.339078	1.58681	-0.339078	-0.339078	-0.339078	0.969203	-0.339078	-0.339078	1.40693	-0.339078	-0.339078	-0.339078	-0.339078	-0.339078	2.0499	-0.339078	-0.339078	-0.339078	-0.339078
EGR1	1.02095	0.548114	0.8322	1.59424	1.72276	1.19522	1.30432	-0.872702	1.61512	-0.098041	-0.370372	0.573501	0.310069	0.0427598	-0.59176	-0.0780084	0.568865	1.7122	-1.1603	-0.743301	-0.535245	-0.766931	0.669398	-0.124032	-0.634609	0.562367	1.5062	0.116628	0.932904	1.66563	0.763755	0.192321	-0.860778	0.437186	0.902083	0.756159	0.116373	1.92512	1.89947	1.17636	1.76815	1.90276	2.34825	1.92601	2.42257	1.50232	1.04071	-0.327931	0.520384
STEAP2	-0.579369	2.03076	2.02214	-0.579369	-0.579369	-0.579369	2.14245	-0.579369	1.80317	-0.579369	-0.579369	-0.579369	-0.579369	-0.579369	1.90991	-0.579369	-0.579369	1.42475	1.76506	-0.579369	0.934712	-0.579369	1.47292	-0.579369	-0.579369	-0.579369	2.19787	1.00634	1.62712	1.54001	0.617512	-0.0524192	-0.579369	-0.579369	-0.579369	-0.579369	1.60525	1.90899	2.39154	1.81458	2.84567	2.57863	1.93111	-0.579369	-0.579369	2.43897	-0.579369	1.57711	-0.579369
CERS5	0.208648	-0.797477	0.372978	1.18979	0.685762	0.339539	-1.82263	-3.27221	0.829146	0.0316469	-0.713583	0.328791	0.494409	0.614511	-0.14944	0.461085	0.301257	0.834724	0.072252	-0.126379	0.870341	0.377199	0.469473	0.115885	0.419907	1.0139	0.341896	0.0435296	-0.64103	0.636711	0.221153	0.136502	0.380711	-0.324744	0.58485	-0.207781	0.304727	-3.27221	0.386556	0.410243	-0.352184	0.669675	-0.156847	0.431825	0.194974	0.516688	0.136694	0.136986	-0.414762
REEP6	0.558304	0.364796	-1.46495	0.595444	0.403582	-0.10097	0.187881	-2.03236	0.911425	1.27977	1.22279	0.731269	0.531894	0.728987	-0.0829545	0.487376	-2.03236	0.727444	0.946662	0.725937	0.869822	0.705683	-2.03236	0.970061	1.10127	0.521756	0.659152	0.952862	1.38151	0.72353	0.749267	0.270319	0.430803	-2.03236	0.499335	0.0858167	0.571916	1.5317	1.03047	-1.51736	0.538501	0.411817	-2.03236	0.388076	-2.03236	0.877185	0.0341865	-2.03236	0.0215913
WASF3	-3.24573	0.29558	0.813893	0.406716	-0.358906	-0.111261	0.425437	0.522838	0.652603	-0.314842	0.537931	0.408851	-0.223785	0.196291	-0.217874	-0.298091	-0.700074	-0.565471	0.825005	-0.231476	0.792663	0.223745	0.590735	1.22453	1.1361	-0.831465	-3.24573	0.451911	0.583105	0.230051	0.30709	0.21367	-0.881629	-0.685286	0.49436	-0.000251895	0.171022	-3.24573	0.470916	0.0460303	1.28384	-3.24573	1.68705	-2.26988	-0.342422	0.460207	-0.536911	-0.70412	1.26499
RPL13A	1.65308	1.27756	1.01614	1.19603	0.304862	-0.102623	2.42624	1.1459	1.60594	0.906473	0.0907818	0.64941	0.335002	0.663022	0.154506	0.0797605	0.812561	1.54433	0.670979	1.2621	0.618859	0.257245	0.329782	0.165068	1.47586	-0.128082	0.888454	0.709567	3.10548	1.48337	-0.0923903	-0.978506	-0.7828	0.573668	-0.544011	0.0520152	-0.89691	2.96527	0.921001	0.888459	1.63435	1.59284	2.14404	1.02351	2.23964	1.79752	2.41506	-0.338272	0.28462
TPT1	1.30494	1.5435	0.791288	0.422324	-0.382794	-0.159488	2.35758	1.36472	1.59781	0.86862	0.683001	0.62239	-0.861415	0.540941	-0.518729	-0.955898	-0.148069	1.54167	0.814927	1.91869	0.290627	-0.35949	-0.516381	-0.47122	1.17951	-0.164575	0.6344	0.844752	2.39261	1.28206	-0.828501	-0.425757	-1.03088	-0.572502	-0.697305	-0.715452	-1.34106	1.26482	0.322151	0.226682	2.03873	2.1399	2.3198	1.73827	2.54962	1.94567	1.65336	-0.760451	-0.369823
AMH	-0.444317	-0.444317	0.554975	0.898664	-0.444317	0.675443	3.61987	-0.444317	3.14499	-0.444317	-0.444317	-0.444317	-0.444317	-0.444317	-0.444317	0.10112	-0.444317	-0.444317	2.57858	-0.444317	1.52675	-0.444317	-0.444317	2.60369	-0.444317	-0.444317	-0.444317	2.80403	2.53021	2.30047	-0.444317	-0.444317	-0.444317	-0.444317	-0.444317	-0.444317	2.30535	-0.444317	2.41838	-0.444317	-0.444317	2.27978	-0.444317	-0.444317	-0.444317	-0.444317	-0.444317	-0.444317	-0.444317
AKT1	-1.68461	-1.68461	1.59535	0.55453	-1.68461	0.738133	1.18146	-1.68461	0.57742	-1.68461	-1.68461	0.339001	0.657051	0.693435	0.781198	0.685165	0.225092	0.488847	0.600051	0.579101	-0.0626258	0.281631	0.760402	-1.68461	-0.153608	-0.418745	0.779146	0.937257	0.0866588	0.855085	0.873122	0.411093	0.604087	0.902547	1.21839	0.757495	0.301967	1.51779	1.14859	1.62337	0.377165	0.680971	0.287633	1.39636	1.27615	0.681009	0.123981	0.727967	0.206132
TMEM47	-0.414625	-0.414625	-0.414625	-0.414625	-0.414625	-0.414625	-0.414625	-0.414625	2.92327	-0.414625	-0.414625	0.248277	-0.414625	1.07934	-0.414625	-0.414625	-0.414625	1.94173	1.78328	-0.414625	-0.414625	-0.414625	-0.414625	-0.414625	3.42466	-0.414625	-0.414625	1.83768	1.70274	-0.414625	-0.414625	-0.414625	-0.414625	-0.414625	2.43406	1.59795	-0.414625	-0.414625	-0.414625	-0.414625	3.2617	-0.414625	1.05455	-0.414625	-0.414625	3.78335	-0.414625	-0.414625	2.07936
TOE1	0.925732	1.16736	0.632946	0.692543	0.927678	-0.394834	0.456472	1.41303	-0.677108	0.211405	-1.23293	0.769246	-1.23293	1.28885	1.08542	1.07616	0.609924	-1.23293	0.672064	0.117115	-1.23293	0.891968	0.597521	-1.23293	1.67519	1.17557	-1.23293	0.871805	0.335084	-0.0487308	-0.0748753	0.926836	-1.23293	0.876689	-0.583305	0.928942	-1.23293	-1.23293	0.861478	0.504233	1.44882	1.77329	0.512996	-1.23293	1.30355	-1.23293	0.921882	-1.23293	1.1215
NORAD	1.27505	0.824513	-0.00707945	1.19039	0.856839	0.283334	1.2364	1.1202	0.965973	0.719278	-2.47664	-0.0803455	0.427349	0.12173	-1.77368	0.219898	0.4186	1.5285	0.954325	-0.706987	-0.257842	-0.511042	0.236577	0.103789	-0.236217	-0.929044	0.507813	0.711386	0.439788	0.775406	0.598282	0.533714	0.0891706	0.502418	0.204544	1.23117	-0.552427	1.51213	1.23973	1.01937	0.980415	-0.96542	0.587727	1.41266	0.0361095	0.804193	0.891216	0.368333	-0.517963
AL356804.1	-2.13212	1.37442	0.442053	0.143134	0.492063	0.411084	0.957315	-2.13212	0.609567	-0.0893721	1.02048	-1.02364	0.127652	-0.331599	-0.000921176	-0.841804	0.327309	0.20844	0.768739	-0.833062	-0.234656	-0.490382	0.765091	-0.920684	-2.13212	0.600275	0.321168	-0.439521	-0.0600168	-2.13212	0.665029	0.765452	1.0382	0.064841	-0.700705	-0.781781	0.461534	1.48187	0.564687	0.690074	-2.13212	0.330838	-2.13212	0.648848	-2.13212	-2.13212	-2.13212	0.635011	-2.13212
GNAL	-1.38783	-1.38783	-1.38783	-1.38783	-1.38783	1.19488	-0.67356	1.00967	0.212659	-1.38783	0.852181	0.568984	-1.38783	0.238952	-1.38783	0.427671	-1.38783	0.854414	0.147988	0.967642	-1.38783	-1.38783	0.817829	0.8084	0.740405	0.510177	-1.38783	1.28004	0.896125	0.59554	-1.38783	0.66874	-1.38783	-0.894599	-0.288839	0.23266	-1.38783	0.694219	0.908615	-1.38783	-1.38783	-1.38783	-1.38783	0.91753	0.832559	-1.38783	0.925308	-0.177863	-1.38783
ITGB8	-0.655738	-0.655738	0.612123	-0.655738	-0.655738	-0.655738	0.3288	-0.655738	1.69381	-0.655738	-0.655738	-0.12854	-0.655738	-0.00585924	-0.655738	0.816588	0.0503053	2.19654	1.64548	-0.655738	-0.655738	-0.655738	0.0564784	-0.655738	0.308163	-0.655738	-0.655738	0.849547	0.618293	-0.0249205	0.763033	-0.655738	1.17279	-0.655738	0.252759	-0.655738	-0.655738	-0.655738	1.48604	1.24212	-0.655738	2.05973	-0.655738	2.26826	-0.655738	2.90058	-0.655738	-0.655738	-0.655738
FSCN1	0.913613	1.0503	1.12854	-0.102573	-1.1518	0.813835	0.639674	-0.688058	1.2596	-1.1518	0.947709	0.687645	-0.00694954	1.05734	0.335498	0.966458	1.16639	0.890981	1.31574	0.434561	-0.51071	-1.1518	0.51125	1.20084	1.67534	-1.1518	-1.1518	1.43786	1.06077	1.39982	0.989163	0.564132	0.488453	1.01293	0.509381	1.25722	0.453487	1.24437	1.55579	-1.1518	1.39766	1.56402	1.48209	1.09941	1.81451	0.941961	0.615323	1.06262	-0.415755
DUSP1	0.662265	0.469443	0.822234	1.47241	1.52162	1.03445	1.31236	0.797124	0.809365	-0.305082	-0.0874235	0.104929	-0.307369	-0.129684	0.230298	-0.095216	0.371583	1.28409	0.152496	-0.437059	0.0609485	-0.217831	-0.172789	0.235729	-0.12537	0.062581	1.92753	1.23521	-0.319154	0.946304	0.898855	0.0514997	0.198222	-0.11253	1.22195	1.10329	0.750869	1.39774	1.84537	1.02772	1.83277	1.99995	1.81396	1.56596	2.19928	0.977201	0.861787	0.287071	-0.365678
ATF3	-0.637935	-0.637935	-0.637935	1.72136	2.16571	-0.637935	1.47261	-0.637935	1.64326	-0.637935	-0.637935	1.01037	0.183922	-0.637935	-0.637935	-0.246705	-0.637935	1.52655	-0.637935	-0.0935594	-0.637935	-0.637935	-0.637935	-0.637935	-0.637935	-0.637935	2.13355	0.468659	0.688426	2.17735	0.136228	-0.248789	-0.637935	-0.637935	2.11017	-0.637935	0.784272	1.54743	2.23449	-0.637935	2.67652	3.03313	2.4689	2.29766	2.89525	0.917916	1.29116	-0.637935	1.30594
RPS29	2.23173	1.19433	0.856767	0.833809	-0.179083	0.181273	2.32252	1.20638	1.31678	0.395764	0.599557	0.0826907	-0.755851	0.056268	-0.124718	-0.714272	0.0724882	0.935057	0.387367	0.744357	0.356347	-0.288821	-0.28137	-0.0328728	0.677283	0.0825567	0.47416	0.35765	3.14035	0.646542	-0.734224	-1.27716	-1.16438	-0.175711	-0.784579	-0.812152	-2.1482	2.37055	0.242627	0.798899	1.57391	2.04513	1.35182	0.8647	2.11318	1.41147	1.53272	-1.30743	0.81878
TIMP1	0.539605	1.37277	0.701272	1.82467	-0.71886	-0.00684123	1.21299	0.496753	1.16701	0.0899407	-0.77435	0.735952	0.394152	0.658896	0.687771	0.794641	0.992601	1.63401	0.672646	0.428515	0.630988	0.978127	0.469925	0.0788842	0.97983	0.368334	1.1613	1.15213	2.0606	1.39714	0.173336	-0.450545	-0.362543	0.102615	-0.424783	0.220011	-0.305169	2.03598	0.670165	1.08237	1.97634	2.31417	2.03005	1.66358	2.38979	1.30595	1.48609	0.208685	-0.602807
GSN	-0.205871	0.856461	1.08029	1.05057	0.735039	0.0817318	0.520197	0.162607	0.704259	-0.206739	0.197854	0.542378	0.26418	1.00469	0.339331	0.417896	1.27364	1.36289	0.691122	-0.0933433	0.84156	1.52788	0.589967	-2.30883	1.22833	0.808952	0.430062	0.415128	0.175167	1.39328	0.987291	0.253601	-0.0742458	0.0522243	0.631664	0.789869	-0.00671752	2.02715	1.2239	0.776708	0.82042	-0.584449	1.09157	0.625974	-3.15738	1.66469	1.01884	0.12807	-0.705438
RPLP2	1.67105	2.00546	0.541814	0.728629	0.0848963	-0.274355	1.98161	1.09748	2.10419	1.16042	0.0367125	0.136158	-0.430601	0.360251	-0.324378	-0.781133	0.188422	1.50177	0.751235	1.17929	0.119718	-0.237155	-0.205819	0.36174	1.49719	-0.505813	0.847373	0.33306	3.49708	0.869604	-1.15191	-1.05481	-1.02673	-0.376135	-0.892924	-0.701631	-1.25256	2.20502	0.0208927	0.968104	1.64488	1.8383	1.74599	1.23992	2.04594	1.78303	1.79091	-0.878193	0.800871
BMP3	-0.428095	-0.428095	-0.428095	-0.428095	1.37109	-0.428095	3.04925	2.96983	2.66596	-0.428095	-0.428095	-0.428095	1.83609	1.93086	2.32557	2.81445	-0.428095	-0.428095	2.19217	-0.428095	-0.428095	-0.428095	-0.428095	-0.428095	3.25341	0.476104	-0.428095	-0.428095	-0.428095	-0.428095	-0.428095	0.20434	-0.428095	-0.428095	-0.428095	-0.428095	-0.428095	-0.428095	2.34913	-0.428095	-0.428095	-0.428095	-0.428095	-0.428095	0.833767	-0.428095	3.55504	-0.428095	-0.428095
LGALS3BP	0.734387	0.573384	0.861872	1.03405	0.994786	0.493181	1.34725	0.147654	0.986406	-0.153615	-0.0343867	0.600574	0.152779	1.08159	0.445371	0.579091	1.17464	1.21025	0.649998	-0.656817	0.797327	0.57371	0.0669437	-0.014346	0.37569	0.334444	0.568358	1.05682	0.0426574	0.957255	0.361782	0.0708733	0.560264	0.771275	0.339416	0.674524	0.992335	1.94239	0.908377	-0.607213	0.434783	-0.00751289	0.475299	0.441784	0.47949	0.590779	0.779178	0.108257	-0.507538
RASSF4	2.03232	-0.809195	-0.809195	-0.809195	-0.809195	0.981539	-0.809195	-0.809195	-0.809195	-0.809195	1.68564	-0.409099	-0.809195	1.81022	1.3987	0.92174	-0.809195	-0.809195	-0.809195	-0.206314	1.77453	1.48124	1.34804	-0.809195	-0.809195	-0.809195	-0.809195	-0.0559411	1.35818	1.41183	1.13502	-0.809195	1.39586	-0.809195	0.933945	-0.17317	-0.809195	-0.809195	0.526999	1.53434	-0.809195	1.55691	0.706867	-0.809195	-0.809195	-0.809195	1.67314	-0.809195	0.967232
OCIAD1	1.40273	-1.63726	-0.268907	-0.108133	1.68669	0.508665	-0.751798	-1.38521	-0.0535175	1.33268	0.0513555	1.23699	-0.0726513	0.135928	0.825055	-0.313166	0.53882	1.05497	0.852075	1.29838	0.483089	-0.900188	1.18622	1.36423	-0.360731	0.980739	-0.808854	1.11752	-2.18786	-0.769253	0.559053	-0.181319	0.227081	1.16445	-0.0615392	0.69681	0.360767	2.11303	0.760727	1.04585	0.681201	0.712251	-1.59436	1.2372	1.83977	-3.17512	0.875989	1.03745	-0.822037
JUNB	1.35048	0.741052	1.16128	1.3076	1.32752	0.746639	1.32051	-0.306516	1.13739	0.00720622	-0.254267	0.368337	0.649742	0.738028	0.326901	0.38542	0.562995	1.64296	-0.0727338	-0.238834	0.18772	-0.432374	0.568888	-0.0700444	0.140967	0.975479	1.73562	1.05116	0.165578	1.74537	1.05552	0.230824	0.0105859	0.0361277	0.746177	0.965332	0.247767	2.03447	1.94841	1.10196	1.42392	1.57878	2.08544	1.06044	1.85008	1.22135	1.69041	0.405161	-0.283378
PARP9	-0.494323	2.59153	0.210725	1.3167	-0.494323	2.47031	-0.494323	-0.494323	0.62288	-0.494323	-0.494323	-0.494323	1.66408	1.73081	-0.494323	-0.494323	-0.494323	2.78864	0.345911	1.66313	-0.494323	-0.494323	-0.494323	-0.494323	1.68205	-0.494323	-0.494323	0.167114	1.74875	1.3677	2.06838	-0.494323	-0.494323	-0.494323	-0.494323	-0.494323	-0.494323	2.84593	1.34781	2.29013	2.28838	2.84643	-0.494323	-0.494323	1.0243	2.34983	-0.494323	-0.494323	-0.494323
CFI	-0.722589	1.54398	-0.722589	1.26321	-0.722589	1.15107	1.04266	1.24968	1.49955	-0.722589	1.17028	0.905431	1.06876	1.16457	-0.722589	0.977138	1.37451	1.56057	1.38387	-0.722589	-0.722589	0.693854	1.18683	-0.722589	1.75969	-0.722589	1.44798	1.41837	0.96956	1.45138	0.539477	-0.722589	-0.722589	-0.722589	-0.722589	0.866932	0.55233	2.45322	1.68027	0.893697	2.20828	2.16292	2.41117	2.2363	2.20837	1.18308	-0.722589	-0.722589	1.15179
AC003077.1	-0.576211	-0.576211	-0.576211	2.39367	-0.576211	0.276157	0.739375	-0.576211	-0.576211	-0.576211	-0.576211	0.128256	0.151595	-0.576211	-0.576211	2.29969	-0.576211	-0.576211	-0.576211	-0.576211	-0.576211	0.43131	1.5204	1.45288	2.62825	1.69909	-0.576211	-0.576211	-0.576211	-0.576211	-0.576211	1.50773	0.71059	1.94149	0.918984	1.02352	-0.576211	-0.576211	-0.576211	-0.576211	-0.576211	-0.576211	-0.576211	-0.576211	-0.576211	-0.576211	-0.576211	2.66947	-0.576211
CAPNS1	-0.253179	0.672461	0.155838	0.974316	-2.50565	-0.226757	0.444017	1.03025	0.454999	0.296628	0.363702	1.08047	0.209603	0.389038	0.4914	0.582069	0.261735	0.698212	0.61765	0.799121	-0.457959	0.127366	-0.101722	0.835394	1.1659	0.241049	0.794049	1.49327	1.0428	0.635691	0.203458	-0.61164	0.00479655	-0.0081638	-0.0163025	1.19878	0.0481947	0.634996	1.3526	-3.04562	0.864334	0.928792	0.970815	-2.4188	0.240481	0.587582	0.835386	-1.15565	0.118461
RPL23AP49	0.759949	-0.732129	-0.732129	-0.732129	-0.732129	-0.732129	-0.732129	1.46502	-0.732129	2.23447	2.10091	1.63375	-0.732129	-0.732129	-0.732129	1.43444	0.640128	2.13438	-0.732129	1.74828	-0.732129	-0.732129	-0.732129	-0.732129	2.04537	-0.732129	-0.732129	1.21548	2.05613	-0.732129	0.496226	1.12962	1.50739	0.924965	-0.732129	1.00817	0.99196	-0.732129	1.06066	-0.732129	-0.732129	-0.732129	-0.732129	-0.732129	-0.732129	-0.732129	-0.732129	-0.732129	-0.732129
HPSE	-0.412582	-0.412582	2.50022	-0.412582	-0.412582	-0.412582	-0.412582	-0.412582	-0.412582	-0.412582	-0.412582	3.00406	-0.412582	-0.412582	-0.412582	-0.412582	0.886094	2.67868	2.87255	2.04837	0.433925	-0.412582	-0.412582	-0.412582	-0.412582	-0.412582	-0.412582	0.826129	2.40844	-0.412582	-0.412582	-0.412582	-0.412582	-0.412582	-0.412582	-0.412582	2.10216	-0.412582	3.07128	3.42817	-0.412582	-0.412582	2.25737	-0.412582	-0.412582	-0.412582	0.923611	-0.412582	-0.412582
SNHG8	1.22869	1.22723	1.26715	1.35133	1.07843	0.372792	1.95715	0.317757	0.651873	0.346509	0.485774	-0.209843	0.414436	-0.153781	-0.694095	0.272267	0.724004	0.916129	-0.0608245	0.634603	0.770498	0.359585	0.626803	0.469152	-0.119087	0.241874	0.869521	0.0816625	1.69517	1.04178	0.565382	-0.300272	-0.700368	0.571829	0.407722	0.953601	0.0611151	1.47801	0.995661	0.795178	1.59397	1.36255	1.69934	1.44051	2.23614	1.50284	1.65149	0.213718	0.734484
COL4A3	-0.564051	0.333906	1.98675	-0.564051	-0.564051	-0.564051	1.89454	-0.564051	2.8131	-0.564051	-0.564051	1.79889	-0.564051	-0.564051	-0.564051	-0.564051	-0.564051	1.55849	2.29446	-0.564051	-0.564051	-0.564051	-0.564051	-0.564051	-0.564051	-0.564051	-0.564051	2.21717	1.71095	1.60549	1.02866	1.64392	0.0375729	-0.564051	1.91382	0.774026	1.73883	1.70008	2.71326	-0.564051	-0.564051	2.78373	2.18283	-0.564051	2.06628	-0.564051	-0.564051	-0.564051	-0.564051
RPS12	1.87068	1.39472	0.922377	1.3919	-0.160381	0.193223	2.38544	1.35661	1.45088	0.932113	0.473292	0.294901	-0.164419	0.839814	-0.55832	-0.0922772	0.522888	1.25948	0.0208621	0.808237	0.497703	-0.315839	0.271769	-0.02232	1.55202	0.013097	0.629094	0.214929	2.59976	1.07861	-0.309769	-0.68374	-0.451977	0.669977	-0.583255	-0.0308285	-0.883604	2.51225	0.29963	0.912603	1.61335	1.56234	1.94098	0.931335	2.00559	1.7125	2.05897	-1.07497	1.0676
TRIM25	-0.439061	-0.439061	-0.439061	-0.439061	-0.439061	3.90219	-0.439061	-0.439061	2.82076	-0.439061	-0.439061	1.6348	-0.439061	-0.439061	-0.439061	-0.439061	2.49941	1.23626	3.34916	-0.439061	1.37221	-0.439061	1.10959	-0.439061	-0.439061	-0.439061	-0.439061	0.545866	3.0746	0.962518	2.27818	-0.439061	-0.439061	-0.439061	-0.439061	2.77131	-0.439061	-0.439061	3.61914	-0.439061	0.840534	-0.439061	1.28745	-0.439061	-0.439061	-0.439061	-0.439061	-0.439061	-0.439061
RAP1GDS1	-2.81937	0.777425	-0.308826	-1.75416	0.897164	-0.11565	0.0817923	0.225424	0.589919	0.458436	0.508627	1.04991	-0.373705	0.686784	1.08155	0.773862	0.6037	0.089829	0.58201	0.852216	0.48992	0.531668	0.603953	0.68671	0.930491	1.1793	1.09136	0.16084	0.103898	0.234678	0.349131	0.515113	0.0161312	0.0956957	0.124032	-0.084769	0.462225	0.901768	0.545862	0.216632	-1.91569	0.632078	-0.922848	-0.201561	-2.81937	0.535726	0.0328765	0.720946	0.848599
CTF1	-0.544073	-0.544073	1.61229	-0.544073	2.47222	-0.544073	-0.544073	-0.544073	-0.544073	2.73572	-0.544073	1.55735	2.34679	0.13773	1.31701	-0.544073	-0.544073	2.09137	2.21753	-0.544073	-0.544073	-0.544073	-0.544073	-0.544073	-0.544073	1.87459	-0.544073	1.94515	1.67759	2.52629	1.24045	1.25231	1.2977	-0.544073	1.54471	0.955154	0.215844	-0.544073	2.63241	-0.544073	2.31016	-0.544073	-0.544073	-0.544073	-0.544073	1.37717	-0.544073	-0.544073	-0.544073
MAFF	-0.929556	-0.929556	-0.929556	1.02451	0.87397	-0.929556	1.36949	-0.929556	0.73557	-0.929556	-0.929556	1.14381	0.266844	0.99292	1.09296	-0.929556	-0.929556	1.8737	-0.929556	-0.929556	-0.929556	0.911422	1.18044	-0.929556	1.71166	0.492505	1.37578	0.67013	-0.929556	1.58827	1.41174	0.564749	0.370661	-0.477195	-0.929556	1.59541	-0.447604	1.758	1.93702	-0.286872	1.87155	1.97475	2.25922	-0.929556	2.18792	-0.929556	-0.929556	0.976286	-0.929556
MTMR9LP	-0.574954	1.41367	1.0894	2.70696	-0.574954	-0.574954	2.98768	-0.574954	1.87355	-0.574954	-0.574954	1.05797	1.61439	-0.574954	-0.574954	-0.574954	-0.574954	1.62346	-0.574954	-0.574954	-0.574954	-0.574954	2.34356	-0.574954	-0.574954	-0.574954	-0.574954	0.0864705	2.11408	2.13787	2.17906	-0.574954	-0.574954	-0.574954	1.02017	2.14348	-0.574954	-0.574954	2.65805	0.0649592	1.4766	-0.574954	-0.574954	-0.574954	1.18867	-0.574954	-0.574954	1.60739	-0.574954
RNASEH2C	-1.65849	0.000605799	-0.0681512	1.5122	0.102218	0.626761	-0.117292	0.69384	0.942481	0.798343	1.04297	0.930822	0.756339	-0.714924	1.23217	0.398677	1.39063	0.304371	-0.770902	2.96625	0.73543	-0.102516	-0.106503	0.476316	0.936196	0.491873	0.537029	-0.0766573	2.45558	1.14801	-0.624191	-0.28887	-0.486073	0.0442715	0.270875	-0.138029	1.06304	1.09058	0.589326	0.163611	-0.231677	-0.490605	-0.016872	0.803411	0.477081	-0.514961	1.9726	0.0613024	0.273297
ZFAS1	2.1697	1.41806	0.124376	1.04473	-0.379925	0.287035	1.93193	1.09348	1.53465	0.472406	-0.144923	0.000934275	0.449754	0.371841	-1.4128	-0.491194	0.520146	1.47713	1.14144	0.637304	0.121456	-0.0572481	0.259563	-0.848934	0.953771	0.052972	0.396862	0.807368	2.60747	0.853928	0.0756031	-0.177061	-0.872273	-0.0992705	0.054942	0.532607	-0.303103	1.801	0.572963	0.612791	2.0134	1.96474	2.14587	0.783716	2.29693	1.97564	1.93971	-0.870557	0.572922
EPM2AIP1	2.15598	1.53501	0.706953	-0.762348	-0.762348	-0.762348	-0.762348	0.0831754	1.36141	-0.762348	-0.762348	1.7117	1.38753	1.35409	-0.762348	-0.762348	1.39014	1.69694	1.74391	-0.762348	1.01734	-0.762348	0.819882	-0.762348	2.06827	-0.762348	-0.762348	0.714495	1.52014	1.52426	-0.762348	1.19887	0.906428	-0.223839	1.00605	-0.762348	1.61673	2.20139	1.80089	0.831819	1.43766	2.012	1.5613	-0.762348	1.52769	2.16967	1.87269	-0.762348	-0.762348
UBE2L6	1.28351	0.473614	1.24075	1.25111	1.11081	-1.10258	-0.151655	1.25944	1.21652	0.178722	-1.10258	1.20166	0.455226	1.16391	0.781697	1.24375	1.43021	1.9389	1.33661	1.25372	1.03938	0.593229	-1.10258	-1.10258	1.63505	0.88239	-1.10258	1.1526	1.20472	1.35158	0.325871	-0.243115	-0.0777988	-1.10258	0.51843	0.84237	0.809584	1.67024	1.4215	-1.10258	1.42868	-1.10258	1.05919	0.861763	0.260704	1.54263	1.25084	0.987816	-1.10258
RPL27	1.633	1.17294	1.03525	1.16417	-0.243469	-0.0573733	2.19327	1.88649	1.72163	0.916061	0.469757	0.661222	0.0874711	0.923882	-0.404075	0.071601	0.73028	1.38493	-0.149088	0.52626	0.407444	-0.568477	0.175207	0.145003	1.22602	-0.706352	0.813491	0.800272	2.98723	0.97596	-1.32641	-1.34342	-1.51295	-0.839814	-0.449172	-0.39858	-1.31065	2.36287	0.492547	1.00998	1.81904	1.96446	2.19913	0.909639	1.84372	1.405	2.06164	-0.871752	1.09364
RPS15A	2.01675	1.36484	0.941291	1.36552	0.071957	0.269825	2.07976	1.01462	1.35665	1.09979	0.115122	0.615252	0.401599	1.08377	-0.218496	-0.106244	1.295	1.16545	0.443187	0.803645	0.329022	0.271413	0.445437	0.636721	1.43911	-0.0295596	0.128884	0.510624	3.04056	0.905131	-0.399588	-1.24132	-1.11467	-0.172355	-0.782132	-0.108331	-0.913163	2.1387	0.495936	0.682473	1.73228	1.98921	1.92007	1.158	2.15846	1.56575	2.01741	-0.192163	1.20711
APTR	-0.804496	0.573268	1.71053	2.10955	-0.804496	-0.146723	1.17611	-0.804496	1.28145	-0.804496	-0.804496	-0.804496	0.922253	0.588544	1.64232	-0.804496	-0.804496	-0.804496	0.857297	2.4407	-0.804496	1.43652	-0.804496	-0.804496	2.48646	0.0327235	-0.804496	0.612373	1.58964	0.806989	-0.804496	-0.804496	0.188529	0.235774	1.56403	0.98646	-0.804496	-0.804496	0.582899	-0.139515	0.882306	0.363852	-0.804496	1.24597	-0.804496	-0.804496	2.3595	-0.804496	-0.804496
PRKACB	-0.562092	-0.562092	0.596032	2.02857	-0.562092	-0.562092	-0.562092	-0.562092	0.684456	-0.562092	2.06218	-0.562092	-0.562092	-0.562092	-0.562092	1.69248	-0.562092	-0.562092	-0.562092	-0.562092	-0.562092	-0.562092	-0.562092	-0.562092	-0.562092	-0.562092	-0.562092	0.777963	0.848537	2.31777	-0.562092	2.01963	0.149315	2.12241	1.64236	2.40819	1.79716	-0.562092	0.927604	0.507372	-0.562092	-0.562092	-0.562092	-0.562092	-0.562092	-0.562092	-0.562092	-0.562092	-0.562092
SLC36A4	1.47078	-0.828048	-0.828048	0.779124	-0.828048	-0.828048	-0.828048	-0.828048	1.48425	1.14453	-0.828048	0.98756	-0.828048	0.835675	-0.828048	1.40249	0.0528503	1.0474	0.651661	-0.828048	-0.828048	-0.828048	1.40389	1.81549	2.31187	-0.140746	-0.828048	0.750313	0.25046	1.40826	-0.828048	0.0830476	0.658068	-0.252522	0.363136	0.954245	-0.828048	-0.828048	1.11588	1.4102	1.04261	-0.828048	2.2688	-0.828048	1.95409	0.0405093	-0.828048	-0.828048	1.60911
TMEM150C	-1.00221	1.20064	-1.00221	1.02712	0.400455	-1.00221	-1.00221	-1.00221	-1.00221	-0.328019	1.80554	-0.338246	0.921174	1.69752	1.69788	-1.00221	1.4908	0.103866	-1.00221	0.763737	0.526319	-1.00221	0.895613	1.05409	1.40147	-1.00221	1.6292	0.452725	0.477368	1.40542	0.438323	0.712214	1.07175	1.92669	0.753386	-0.321478	0.28575	1.8191	0.862998	1.2224	1.64568	0.796569	1.23781	1.4033	1.55208	1.70957	0.383337	-1.00221	-1.00221
SULT1A1	-0.387138	-0.387138	-0.387138	-0.387138	-0.387138	-0.387138	2.5383	-0.387138	3.42361	-0.387138	2.89773	2.11455	-0.387138	2.31324	-0.387138	-0.387138	3.02179	-0.387138	2.6734	-0.387138	-0.387138	-0.387138	-0.387138	-0.387138	-0.387138	-0.387138	-0.387138	2.85445	2.82863	-0.387138	-0.387138	-0.387138	-0.387138	-0.387138	-0.387138	-0.387138	-0.387138	-0.387138	2.74734	-0.387138	-0.387138	-0.387138	-0.387138	-0.387138	-0.387138	-0.387138	3.70518	-0.387138	2.14147
RPL41	2.46814	1.53714	0.942676	0.809677	0.0735062	-0.218066	2.411	1.01557	1.46687	0.955289	-0.209052	0.396903	-0.100123	0.337893	-0.198474	-0.279315	0.647112	1.27081	0.795002	0.95894	0.381083	0.154803	0.11228	0.31553	1.35371	-0.259742	0.616204	0.489072	3.73852	0.678331	-0.228214	-0.657363	-0.777767	0.319378	-0.670391	0.215636	-0.843096	2.73626	0.822605	0.707332	1.61863	1.77139	2.17974	1.14889	2.07764	1.88541	2.22812	-0.620225	0.431828
FSTL1	1.72009	1.10932	1.60619	1.58302	0.116322	-0.842493	-0.124047	-0.842493	1.46475	-0.2368	-0.842493	1.57116	1.84451	1.48093	0.961825	2.09313	2.32084	1.13973	0.909348	0.650796	0.663052	0.702871	1.24455	1.48564	-0.842493	-0.250024	1.61684	0.404523	-0.182408	1.98856	0.925107	0.407003	0.623541	-0.842493	-0.842493	0.4249	-0.842493	-0.842493	1.38876	1.44051	0.960834	1.85792	1.42193	0.834533	1.34514	1.59378	1.54439	-0.842493	1.34072
HSPA1B	1.11637	0.221907	1.07052	1.47815	1.2509	0.366054	1.1979	-0.168611	1.52685	-0.818151	0.223077	0.0840302	0.468619	0.471241	-0.00456494	-0.416199	0.289622	1.08553	-0.0794593	-0.967173	-0.0204504	-1.53695	-0.591864	-0.569906	-2.32907	-0.258265	1.2705	0.818432	0.371104	0.984651	0.411017	0.264605	0.19438	0.264414	0.64243	-0.0880653	-0.104328	-0.480427	1.39441	0.892134	2.12138	2.24924	2.04934	1.98247	2.33364	0.881945	0.920298	-0.60092	0.68347
RPS3	1.83893	0.635019	0.688223	1.46132	0.275428	0.100146	2.77981	1.47626	1.87527	1.01415	0.0904409	0.430346	0.187758	0.49472	0.0398512	0.0356484	0.930266	1.48448	0.950693	1.3326	0.653154	0.27359	0.23088	0.369728	1.69871	-0.137703	0.729881	0.886414	3.1292	1.04422	0.0656109	-0.862513	-0.496325	0.285658	-0.822241	0.29751	-1.02775	2.55844	1.05411	0.533783	1.52616	1.76429	2.34453	1.31344	2.13833	1.96837	2.48655	-0.24956	0.471009
NAB2	1.36178	1.46631	1.25	1.85659	-0.682045	-0.682045	2.04425	1.94315	1.53398	-0.682045	-0.682045	0.0960496	0.115043	1.83923	-0.682045	0.724293	1.61237	2.08	1.03282	-0.682045	1.94435	-0.682045	-0.682045	-0.682045	-0.682045	1.07874	0.440078	1.65232	0.87054	2.04711	-0.682045	-0.682045	-0.191314	1.19274	-0.682045	1.89499	-0.682045	-0.682045	1.86845	1.57037	1.73183	-0.682045	2.17704	2.14737	2.15299	0.71662	1.20383	1.30322	-0.682045
P3H3	-0.639687	1.66776	1.73454	1.80794	-0.0703551	1.50446	-0.639687	-0.639687	1.24268	1.6009	0.831159	1.4872	1.78882	0.101879	-0.639687	1.79064	1.97922	0.961587	1.57074	1.53159	-0.639687	-0.639687	2.09006	-0.639687	-0.639687	-0.639687	1.95654	1.2604	-0.639687	2.32228	-0.639687	0.301474	-0.639687	1.78894	-0.639687	0.909412	-0.639687	2.7925	1.55244	1.51295	-0.639687	1.73876	1.70421	-0.639687	-0.639687	0.62213	1.97388	-0.102809	-0.639687
RPS8	1.73313	0.667253	1.10281	1.4924	0.101081	0.0892096	2.94041	1.50333	1.27001	0.885978	-0.516464	0.339693	0.232435	1.01784	-0.336385	0.298007	0.919977	1.12198	0.369145	1.41494	0.495692	0.212812	0.511367	0.405668	1.14203	-0.14326	0.852875	0.289239	3.33173	0.935209	-0.320345	-1.02777	-0.78574	0.601004	-0.466073	0.0589795	-0.956374	2.37942	0.492652	0.655051	1.56518	1.5246	1.97266	0.640709	1.80224	2.14527	2.31957	-0.457541	-0.30964
BTN3A1	-0.403845	-0.403845	-0.403845	3.08647	-0.403845	-0.403845	-0.403845	-0.403845	3.31248	-0.403845	-0.403845	-0.403845	-0.403845	2.67579	-0.403845	-0.403845	0.44388	0.537515	1.04567	-0.403845	-0.403845	-0.403845	-0.403845	-0.403845	3.28811	-0.403845	-0.403845	2.11323	2.62477	3.37127	2.25045	-0.403845	-0.403845	-0.403845	-0.403845	-0.403845	-0.403845	3.2931	2.50376	-0.403845	-0.403845	-0.403845	-0.403845	-0.403845	-0.403845	3.85207	1.3508	-0.403845	-0.403845
IVNS1ABP	-0.744282	0.737161	-0.680069	-0.122741	0.127267	1.22822	0.510921	-0.252201	1.01006	-0.917813	-4.02884	0.289073	0.330884	-0.238724	-0.00191712	-0.659982	1.01206	0.190371	0.193776	-1.32024	-0.838482	-0.446728	0.100023	-0.156415	-0.77004	-2.51086	-1.2626	-0.359349	0.014375	0.666835	-0.84975	-0.565105	0.349732	-0.286042	-0.327278	-0.758272	-0.339794	-0.668161	0.962941	-0.118657	0.709932	0.273186	0.634366	0.843654	-0.0127156	0.311375	-1.69431	-0.0800181	0.675486
MOBP	-0.875129	0.254502	0.542936	1.96852	1.80123	0.937218	-0.875129	-0.875129	1.21104	-0.875129	-0.875129	-0.875129	-0.875129	0.952925	-0.875129	-0.392435	1.09258	-0.875129	0.145566	-0.875129	-0.875129	-0.875129	-0.875129	-0.875129	1.28462	-0.875129	-0.875129	1.15755	0.202023	-0.875129	0.72993	0.511682	1.28364	-0.875129	1.40639	0.137053	0.87957	-0.875129	0.262399	0.981276	-0.875129	-0.875129	-0.875129	-0.875129	-0.875129	-0.875129	-0.875129	-0.875129	-0.875129
C1RL	-0.715606	-0.715606	0.928308	0.59511	1.28488	-0.171914	1.87083	0.640591	1.75742	0.639896	1.3695	1.71955	0.00029076	1.47058	1.58977	1.05487	1.12138	1.33059	1.14608	-0.715606	0.825801	-0.715606	0.17769	-0.715606	2.38719	0.985311	0.89734	-0.147479	1.43437	0.827785	1.25304	0.0255444	-0.715606	-0.715606	0.891889	0.502412	-0.715606	-0.715606	1.82455	0.999832	2.14645	1.8669	2.61262	-0.715606	2.64093	1.44301	0.890291	-0.715606	-0.715606
RPL37	1.90074	1.81131	0.588	1.11888	-0.492108	-0.187217	1.45339	0.535057	1.06344	1.31158	0.795446	0.00457126	0.264282	0.102626	0.314771	-0.349552	0.727841	1.18185	0.37093	0.608054	0.0452337	-0.694567	0.217546	-1.60622	0.649705	-2.26502	-0.0565799	-0.698493	2.6293	1.28025	-0.143098	-0.65337	-0.497874	0.556269	-0.563178	-0.548145	-0.686899	1.51223	-0.0106772	1.30229	1.77088	2.06843	1.35274	1.65011	1.88268	1.20347	1.43208	-0.292492	0.773419
ZNF75D	-0.760444	-0.760444	1.12885	-0.760444	0.24052	-0.760444	1.93574	-0.760444	-0.760444	-0.760444	-0.760444	-0.760444	0.639139	-0.760444	-0.760444	-0.760444	1.41273	1.27597	-0.760444	0.292963	-0.760444	0.836561	-0.760444	-0.760444	-0.760444	-0.760444	-0.760444	-0.147759	0.0710179	-0.180604	1.70035	1.24494	1.25447	-0.760444	0.268082	1.17482	-0.760444	1.94854	1.67147	-0.760444	1.81715	-0.760444	-0.760444	-0.760444	0.281048	-0.760444	-0.760444	-0.760444	-0.760444
SLC25A45	-0.326977	-0.326977	-0.326977	-0.326977	-0.326977	-0.326977	-0.326977	-0.326977	3.84398	-0.326977	-0.326977	-0.326977	-0.326977	3.6692	-0.326977	-0.326977	1.32531	1.47327	1.58993	-0.326977	-0.326977	1.41668	3.1848	-0.326977	-0.326977	-0.326977	-0.326977	1.59476	3.67822	-0.326977	-0.326977	-0.326977	-0.326977	-0.326977	-0.326977	-0.326977	-0.326977	-0.326977	1.44898	-0.326977	3.27891	4.98817	-0.326977	-0.326977	-0.326977	-0.326977	-0.326977	-0.326977	-0.326977
TOMM7	1.40194	1.65654	0.255611	0.940854	-0.408549	-0.811161	2.77902	0.406433	1.4096	1.0048	-0.238575	-0.790612	-0.756382	0.0135191	-1.14423	-0.0647722	0.217464	1.68943	0.691376	0.0436654	-0.292763	-1.16992	0.14801	-2.08232	0.635525	-0.150035	1.67048	0.812696	4.69968	0.402307	-0.214962	0.00947607	-0.764815	-0.135562	-0.242005	0.823041	-0.992282	1.74712	0.139473	0.884141	0.777236	1.80065	0.627574	0.561822	1.50301	0.894267	1.56976	-1.1228	0.248089
CPE	-0.563448	-1.24233	1.36201	0.727671	-1.24233	0.661199	-0.0218598	-1.24233	1.23722	-0.27019	-1.24233	1.12219	0.576338	0.627031	1.27554	0.667252	0.885072	0.618514	1.30001	0.159519	0.855967	0.99423	0.430223	-1.24233	-1.24233	0.930489	-1.24233	1.11874	0.348162	0.273391	0.816032	0.624704	0.930773	-1.24233	0.670382	1.07622	1.15692	1.58776	1.58931	-1.24233	0.696276	1.51668	1.3807	-1.24233	1.15713	1.08687	-1.24233	-1.24233	0.912494
GUCY1A2	-0.0934295	-0.270133	0.52632	-3.13684	-0.22206	0.276106	0.00904449	-1.52518	0.438111	-3.13684	0.36227	-0.0546639	0.756816	-0.120105	0.292884	-0.553429	0.137333	-0.106579	0.594844	-1.61703	0.346533	-0.445772	-0.277513	0.253894	0.731879	0.145355	0.347326	0.785061	-0.21707	0.00779361	-0.238199	0.541967	0.65222	-1.77943	1.01483	0.901167	0.870814	-3.13684	0.707176	-0.42063	-0.036757	-0.483865	0.415331	0.556114	-3.13684	0.326295	0.457425	1.0217	1.33873
CLEC4M	-0.447016	-0.447016	-0.447016	-0.447016	-0.447016	-0.447016	-0.447016	2.88571	1.31346	0.378976	-0.447016	2.30288	-0.447016	2.25023	-0.447016	-0.447016	-0.447016	-0.447016	1.89436	-0.447016	-0.447016	-0.447016	-0.447016	-0.447016	2.91335	-0.447016	-0.447016	2.75669	2.24969	1.85874	-0.447016	-0.447016	-0.447016	-0.447016	-0.447016	-0.447016	-0.447016	-0.447016	3.21792	-0.447016	1.92004	0.680499	3.41153	-0.447016	2.4301	-0.447016	-0.447016	0.253326	-0.447016
KCNAB3	-0.485743	-0.485743	-0.485743	-0.485743	-0.485743	-0.485743	2.16268	2.62484	1.6391	-0.485743	2.4458	1.4699	-0.485743	1.80836	-0.485743	-0.485743	-0.485743	2.39587	2.63928	-0.485743	-0.485743	-0.485743	0.184644	-0.485743	2.95762	2.72128	-0.485743	1.74757	2.27241	-0.485743	-0.485743	-0.485743	-0.485743	-0.485743	-0.485743	0.859357	1.94068	-0.485743	2.77237	-0.485743	1.75316	2.19815	-0.485743	-0.485743	1.4892	-0.485743	-0.485743	-0.485743	-0.485743
CBLB	-1.33012	-1.33012	0.180418	-0.459993	0.765299	-1.33012	-1.33012	1.0824	0.955431	0.947217	-1.33012	0.0118148	0.646085	0.79353	0.59244	0.854212	-0.443085	1.10124	0.675476	-1.33012	-0.0328667	0.77475	0.628282	-1.33012	-1.33012	-1.33012	0.130873	0.769497	-0.244099	0.985428	0.417746	-0.412678	0.0964411	-1.33012	0.909999	1.09111	-0.0919802	-1.33012	1.04946	1.29323	1.61346	2.30586	1.65131	1.6968	1.52337	-1.33012	0.827421	-1.33012	0.665213
ADM	1.09708	0.407163	0.851405	0.563869	0.222452	-0.0264824	-0.959039	-1.64238	1.56887	1.07138	-1.64238	-0.37734	0.613375	0.561107	0.317697	-1.24612	1.12821	0.101154	0.677746	0.347521	-0.58612	0.892452	0.115145	-1.64238	-1.64238	-0.460548	0.978235	1.04767	0.46635	-0.0571285	-0.366056	0.830446	0.595974	0.587264	0.411037	0.58441	0.974704	0.49471	1.50371	0.664114	-0.62678	1.17196	1.00107	-1.64238	-0.10529	0.65193	0.337503	0.638151	0.326481
TNFRSF14	2.2845	-0.598418	-0.598418	1.93178	-0.598418	-0.598418	2.24311	-0.598418	0.890621	-0.598418	-0.598418	2.00543	1.00271	1.5605	-0.598418	-0.598418	-0.598418	2.21992	1.38195	0.990748	-0.598418	0.944317	-0.598418	-0.598418	-0.598418	-0.598418	-0.598418	1.67255	1.88739	2.65927	2.03012	-0.598418	-0.598418	-0.598418	-0.598418	1.51827	1.19509	-0.598418	1.88169	-0.598418	0.778442	0.689664	2.23853	-0.598418	-0.598418	1.1578	2.02685	1.89155	-0.598418
RPL9	0.953013	0.563662	0.493607	1.06941	0.10112	-0.239047	1.8953	0.944248	0.905173	1.369	0.9495	0.720649	0.611183	0.98389	-0.0996211	0.119014	1.20522	1.39176	1.07975	1.66949	1.12178	0.530473	0.900948	1.15764	1.60363	-0.397262	0.896319	0.66122	2.94393	1.45971	-1.05943	-1.68896	-0.864565	-0.177925	-1.29592	-1.01378	-2.32306	0.559729	-0.353005	0.415625	1.49908	1.76778	1.54481	1.09768	1.02853	0.877023	1.92889	-1.03602	0.474261
SERINC1	0.687163	1.03065	0.417505	-0.229848	0.245895	0.132791	-1.4523	0.2862	0.968504	-2.82783	-2.82783	0.521856	0.625752	0.467103	0.449088	0.657221	1.06041	1.18432	0.506036	-1.2713	-0.0710404	-2.82783	-0.101625	0.262961	-0.126133	-2.82783	0.157419	0.240425	-0.166343	1.18994	0.528241	0.297172	0.0119386	0.0863881	-0.349617	-0.468651	-0.287122	1.37144	0.816972	1.1015	1.50656	0.545439	0.944482	0.855441	0.367174	0.982025	0.00901204	0.535111	-0.382058
CCKBR	-0.749384	1.75708	-0.749384	1.69183	-0.749384	-0.0188023	1.63361	-0.193513	1.2333	-0.749384	1.43415	-0.749384	1.15699	-0.749384	-0.749384	0.96851	-0.749384	1.21745	-0.749384	1.89933	-0.749384	-0.749384	-0.749384	-0.749384	1.96246	-0.749384	-0.749384	1.36683	1.14155	-0.749384	0.989406	-0.749384	-0.749384	-0.749384	-0.292436	-0.749384	-0.749384	-0.749384	-0.160881	-0.257221	1.73858	-0.749384	1.88062	-0.749384	1.01638	-0.749384	-0.749384	1.57111	-0.749384
EPN3	3.32148	-0.376126	2.70583	-0.376126	-0.376126	-0.376126	-0.376126	3.94506	0.953593	-0.376126	-0.376126	2.72289	-0.376126	-0.376126	-0.376126	-0.376126	-0.376126	-0.376126	3.18753	0.977429	-0.376126	-0.376126	-0.376126	-0.376126	-0.376126	-0.376126	-0.376126	2.03986	2.86214	0.368928	-0.376126	-0.376126	-0.376126	-0.376126	-0.376126	2.44545	3.04333	-0.376126	4.15887	-0.376126	-0.376126	-0.376126	-0.376126	-0.376126	2.3565	-0.376126	-0.376126	-0.376126	-0.376126
PDGFA	-1.30755	0.324648	-1.30755	0.533451	-1.30755	0.506311	-1.30755	0.947487	0.49774	0.660961	-0.00914679	0.597936	0.194916	-1.30755	0.742315	-1.30755	0.136021	1.03912	0.383729	-1.30755	-0.721584	-0.358874	0.297076	-1.30755	-1.30755	0.0463056	-1.30755	1.64734	1.80016	1.00779	0.463824	0.729556	1.21423	-1.30755	0.85701	0.714921	1.06366	-1.30755	1.71614	1.52396	1.30574	1.8794	1.19239	0.474674	1.43145	0.395242	-1.30755	1.54617	0.405923
RNASE1	1.87217	0.781002	-0.589071	0.323694	0.383044	-1.10614	2.24781	1.70092	2.01421	0.935549	-1.10614	1.11055	0.599427	1.76357	0.298889	0.744587	1.44184	1.20186	1.43549	0.732624	0.775311	0.938179	0.347585	1.03309	1.08292	0.0343637	1.23629	1.21662	2.65329	0.919592	0.742738	0.481592	-1.10614	0.857694	-1.10614	0.867294	-0.332794	1.99726	1.76393	0.491797	0.751452	0.997875	0.726384	0.814505	-0.281553	1.28704	1.79369	0.727496	0.890102
DPH7	1.12115	-0.494921	0.343348	0.667152	0.814375	1.13982	1.64814	-0.65567	1.2978	1.58671	0.672003	0.90491	0.738176	0.725734	1.08264	1.11116	0.949122	0.693474	1.21105	0.980672	-1.16329	-1.16329	0.182648	1.09272	-1.16329	0.407601	-1.16329	0.897591	-0.532857	1.16189	0.866499	0.333165	0.871177	0.795758	1.10022	0.432418	0.888398	1.68042	1.31137	-1.16329	-1.16329	-1.16329	1.0581	-1.16329	0.509268	1.44188	0.741634	1.27893	0.528241
SUOX	-0.279066	1.06346	1.19646	-1.27627	1.31174	-1.27627	-0.28436	-1.27627	0.992874	0.417017	0.227212	0.899893	0.735691	0.22869	1.35244	0.67448	-1.27627	0.765681	1.03354	0.344109	0.81222	0.859285	1.33655	1.11766	1.68939	-0.686278	-1.27627	0.775769	0.451671	0.303366	0.90718	0.911613	-1.27627	0.654044	1.0333	-0.113171	-0.749911	-1.27627	1.0503	-1.27627	1.28725	-1.27627	-1.27627	-1.27627	-0.164192	0.564094	0.740566	0.933183	0.267891
ZNF431	-0.0376541	1.52256	-0.795825	-1.39268	-0.477892	-1.39268	0.643794	-1.39268	1.17099	0.564797	0.691812	0.435212	0.554834	0.817674	0.600615	1.10748	0.417821	1.17907	1.00338	0.433706	0.126506	-1.39268	0.42542	-0.626937	0.82628	-1.39268	-1.39268	0.0428642	0.506185	0.605379	0.61997	0.195605	0.512219	1.32916	0.901677	1.50024	1.20875	-1.39268	0.806562	1.23547	1.26231	1.57493	0.780173	0.744156	-1.39268	0.986785	-0.165036	0.984522	-1.39268
TIMP2	1.95297	1.44978	0.342726	0.785563	-0.631149	0.162465	1.36055	0.887458	1.26917	0.340939	-0.544254	-0.221152	0.234736	-0.35095	0.554703	0.276813	0.968307	1.76349	0.588294	-0.7016	0.512359	0.752838	0.630829	-0.142048	0.356744	-1.3613	0.885787	1.14535	0.716637	1.60987	0.0761577	-0.209106	0.0949364	1.13664	1.06543	1.04406	0.939901	2.46618	1.53072	1.09169	1.20907	-0.712351	1.35901	1.04319	-0.432959	1.15527	1.30927	-1.36155	-0.133855
GADD45B	1.61697	0.203568	0.137837	0.34043	1.53949	0.338489	1.07499	0.132525	1.10878	-0.251419	0.129474	0.136272	0.175474	0.373726	0.432821	0.0160972	-0.28984	1.47762	-0.449479	0.070634	0.686132	0.210972	-0.25493	-0.0731041	0.452407	0.168429	1.07416	0.979955	0.784396	2.06771	0.445428	0.149414	-0.174239	0.512975	0.115105	0.519972	-0.120825	1.59315	1.24884	0.657639	1.53099	1.88892	2.12439	0.845859	2.14094	1.47282	1.63025	-0.292409	0.330876
GADD45G	1.48742	1.19183	0.611297	0.526908	1.61336	0.341589	1.57745	-0.982674	1.74432	1.4962	0.519632	0.816089	0.513057	1.12686	-0.982674	0.382372	-0.527151	1.51242	0.566186	1.24016	-0.982674	-0.274179	-0.982674	-0.982674	0.314221	-0.230017	1.54394	1.28427	1.99441	1.33205	0.277396	0.44609	-0.982674	0.539854	0.106892	1.36036	-0.982674	1.5093	1.42872	1.20623	1.38973	1.28693	1.8303	0.903823	1.84947	1.72251	2.12813	0.740284	0.716693
NDRG2	1.04466	0.95055	1.23913	0.976572	0.545053	0.218679	1.24781	0.544396	0.577271	0.857715	-0.0259158	1.02712	1.00588	0.756981	0.728422	0.517243	0.773235	1.42023	1.04993	0.441541	0.989638	0.754045	0.400068	-0.0313695	1.15387	0.322219	1.01415	0.491167	0.549764	1.00427	0.710565	0.461305	0.278604	0.767148	0.195651	0.736158	0.518046	1.54528	1.42134	0.630083	1.08756	-2.08759	0.901824	0.64654	0.989456	1.48584	1.44601	0.626659	0.0151662
SERPINE2	-2.12052	0.580718	0.290704	1.18408	0.604692	0.671802	0.212878	0.527075	0.818172	-0.71375	0.479576	-0.230286	0.450693	0.115955	0.871279	0.530133	0.40482	0.922058	-0.469998	-2.25794	-0.0800446	0.090766	-0.0847239	0.00751029	-1.52016	-0.563678	0.713106	0.86535	-2.31708	0.88629	0.202999	0.924218	1.10944	-1.67718	0.253381	1.18771	1.0643	0.760822	1.53478	0.7049	0.851477	0.72071	0.898886	1.93962	0.944533	0.726672	0.800178	-0.540971	-1.25292
CLIP3	0.822281	0.601786	0.867115	0.125764	-1.43058	0.243611	-1.19015	-0.473515	0.795415	0.642753	-0.280483	1.04051	-1.90469	0.541296	0.552587	-1.09666	0.453986	0.645172	-0.212691	-0.436821	0.638993	-1.42259	0.661509	0.871285	0.0765154	0.854237	-1.09938	0.576493	0.21272	1.35173	0.538775	0.429125	-0.435909	0.0985489	0.396336	-0.0965622	0.575934	0.726893	0.776811	0.065012	0.360315	-2.37912	0.871534	0.897477	-0.108718	1.47418	1.29827	-0.184451	-1.02414
UBA7	2.53616	-0.478809	-0.478809	1.73383	-0.478809	-0.478809	2.9502	-0.478809	2.89239	-0.478809	-0.478809	0.555979	-0.478809	1.31551	-0.478809	1.70726	3.05737	3.23905	1.15808	2.34444	-0.478809	-0.478809	1.61145	-0.478809	-0.478809	-0.478809	-0.478809	1.05015	1.05503	2.38018	1.80186	-0.478809	-0.478809	-0.478809	-0.478809	-0.478809	-0.478809	3.59462	2.51405	-0.478809	-0.478809	-0.478809	-0.478809	-0.478809	-0.478809	-0.478809	0.608687	-0.478809	-0.478809
DDAH2	1.0079	-2.79685	0.709421	0.82205	0.361719	0.381364	1.35683	-2.79685	0.982004	0.556109	0.916817	0.893466	0.213073	0.225413	0.493642	0.959682	0.71475	1.09983	0.114143	0.770647	0.773968	0.677016	0.531891	0.43331	0.533524	0.519443	0.470079	0.747127	0.276589	0.726526	-0.0195202	-0.069982	0.471945	-0.167625	0.457128	0.103111	0.199143	0.756066	0.677006	0.971347	0.923875	1.22204	0.860217	0.604924	0.78919	0.971108	1.1224	0.18868	-0.832692
AC068473.5	-0.537777	-0.537777	-0.537777	-0.537777	2.54408	-0.537777	-0.537777	-0.537777	-0.537777	-0.537777	-0.537777	-0.537777	2.29939	1.88807	-0.537777	-0.537777	1.3477	-0.537777	2.32187	-0.537777	-0.537777	-0.537777	-0.537777	2.84977	-0.537777	-0.537777	-0.537777	1.64859	0.761666	-0.537777	0.0809314	-0.537777	-0.537777	-0.537777	-0.537777	-0.537777	-0.537777	-0.537777	1.25802	-0.537777	2.78718	-0.537777	-0.537777	-0.537777	2.12074	-0.537777	2.24996	-0.537777	-0.537777
ARMCX1	-0.737401	1.24705	1.98525	1.71401	-0.737401	-0.737401	0.471586	-0.737401	1.28174	-0.737401	-0.737401	1.2938	1.34763	1.50849	-0.737401	-0.0796648	1.84242	-0.737401	1.31359	-0.737401	-0.737401	1.21561	0.766891	0.228056	-0.737401	-0.737401	2.05497	1.07312	-0.737401	1.41555	1.27867	0.953854	-0.737401	0.493063	-0.737401	1.62526	1.08968	-0.737401	1.90402	-0.737401	2.23398	1.91173	2.16099	-0.737401	-0.737401	-0.737401	1.57325	1.85062	-0.737401
CTDSP1	0.806227	0.471539	0.353861	-0.238058	-0.032022	-1.4792	-0.0182621	-0.547984	0.416873	0.458054	0.552186	0.999334	0.886192	0.61214	-0.4675	0.955798	1.40611	0.722813	0.599756	-0.0214775	0.563197	-0.252594	0.0883948	1.0682	1.31077	0.778352	1.11818	0.517159	0.0261115	1.03794	0.575176	-0.0951441	-1.7548	0.936497	0.389595	-0.915898	0.067252	-2.31741	1.07547	0.899593	0.998782	-0.378276	1.24677	-0.734003	0.578712	0.646804	1.17744	0.727999	0.126919
SCD5	-0.998551	0.769637	0.624532	1.73356	1.22334	1.07013	0.510502	0.205284	1.44449	0.744421	0.159411	1.08695	1.2378	0.763428	0.727834	1.5129	1.72226	1.27059	1.01873	0.83446	1.0115	-0.465286	1.22076	-0.0918276	1.27104	1.11398	1.33452	-0.998551	0.918019	1.66249	1.10311	0.466984	0.341191	1.00149	-0.998551	0.752194	0.692645	2.3671	1.29801	0.607812	1.70462	-0.998551	1.97797	1.76879	0.637783	1.60608	1.20736	-0.500813	-0.998551
ANG	2.18842	-0.903356	1.79744	1.34357	-0.903356	-0.903356	1.35361	-0.903356	1.10385	-0.903356	1.32244	1.59929	1.22897	0.934791	0.78614	-0.903356	0.0434287	1.86831	1.13951	1.17224	1.17637	1.27778	0.524223	-0.903356	1.01456	1.04121	-0.903356	0.726395	1.69508	1.38141	1.51617	0.654553	-0.318762	1.68469	0.908134	1.34889	0.726695	0.504382	1.72842	-0.903356	-0.903356	-0.903356	0.524338	-0.903356	-0.903356	2.41141	1.49846	-0.903356	1.37435
CAMK2N1	0.123474	2.16516	1.3446	1.34632	0.727433	-1.00484	0.66894	1.16243	-0.0791543	-1.00484	0.0923904	0.642086	0.901327	0.838842	1.20086	1.62673	-0.149242	1.28734	1.42899	0.468591	0.414244	0.863301	1.51611	-1.00484	0.439495	-1.00484	1.58649	0.757674	0.904132	1.39078	-1.00484	0.841714	-1.00484	0.935477	-1.00484	-0.315757	0.390099	1.35481	1.30806	-1.00484	1.27886	1.30483	0.85015	0.561047	1.82203	1.85876	1.36974	-1.00484	-1.00484
TYRO3	0.732584	-0.400915	0.42533	-1.98195	0.244959	-1.50212	0.809497	0.869019	0.874372	0.851458	0.756965	0.514398	-1.1969	0.86028	0.0187737	0.414473	0.956213	0.971913	0.0220754	-0.346504	0.372532	-0.540446	0.602032	0.639093	1.05158	0.889072	-1.17128	0.350737	1.07907	0.831516	0.159943	0.432571	0.397345	0.506944	0.199013	0.571696	0.682157	1.21821	1.0395	1.01629	1.0794	1.16832	1.3524	0.826683	1.03707	1.45763	0.934383	0.469137	-0.489955
PEX6	-1.00523	-1.00523	1.25317	1.53763	1.8565	-1.00523	-1.00523	-1.00523	1.76445	-1.00523	0.500879	-0.088875	0.399367	0.431802	0.445304	1.47153	-0.19236	-0.392781	1.18493	0.881433	-1.00523	-1.00523	-1.00523	-1.00523	-1.00523	-1.00523	-1.00523	0.766409	0.760514	1.29087	0.559854	0.141214	1.46557	-1.00523	-1.00523	0.928461	0.394267	0.203397	1.01722	1.74343	-0.0447426	-1.00523	1.95349	-1.00523	-1.00523	1.54983	-1.00523	-1.00523	0.654708
NSUN5P1	1.67362	-1.74594	-1.74594	-0.174204	0.803613	0.795247	0.390393	-0.63418	1.57246	0.472589	-0.021575	0.325597	0.526895	0.634606	-1.74594	1.10873	0.426905	0.247341	0.689955	0.298144	-0.878789	1.35288	-0.394666	0.824634	-0.91581	-1.74594	0.32917	0.855655	0.757077	0.847258	0.495411	0.238563	0.882635	-0.877132	-1.74594	1.03982	1.02802	-1.74594	0.820663	0.26853	-1.74594	1.3212	-1.74594	-1.05126	0.38651	0.274719	0.918776	1.19509	-0.406247
PJVK	0.314563	1.3931	-0.897775	-0.897775	1.38353	-0.897775	-0.897775	1.82095	0.823664	1.71427	1.15935	0.871796	1.235	1.34731	1.1314	-0.897775	-0.897775	-0.897775	0.168771	-0.897775	-0.897775	-0.897775	-0.897775	-0.897775	-0.897775	-0.897775	-0.897775	-0.897775	-0.0986422	0.701945	-0.897775	0.724568	1.03879	-0.897775	-0.897775	-0.897775	0.758399	-0.897775	0.558893	-0.897775	-0.897775	-0.897775	0.134461	-0.897775	1.68955	1.60461	0.0480949	-0.897775	-0.897775
GLO1	-2.17883	-0.756517	-0.14784	0.754936	0.607534	0.143812	-1.69454	-0.380839	0.102356	-3.91087	-0.661802	-0.0140984	0.281067	0.338169	-0.0498942	0.369475	0.626215	0.496311	0.166633	-2.89442	0.54136	0.200667	0.444579	0.579397	0.597286	1.11303	0.348244	-0.979497	-2.19988	0.319117	0.264554	-0.0261384	-1.51005	0.274363	0.0436573	0.0015182	0.00178481	0.51075	-0.14064	0.222745	0.310163	0.578958	-0.0630713	1.13085	-1.03377	0.953524	-2.49013	0.225967	0.204358
RPS16	2.07815	1.02065	0.917954	1.05096	0.433234	0.108081	2.33322	1.38181	0.938107	0.775331	0.835436	0.18686	0.167197	0.424992	0.0260562	-0.453456	0.421254	1.47584	0.494361	0.914691	0.759443	-0.114751	0.158859	0.533393	1.15407	-0.383183	1.2461	0.459185	3.45717	0.816673	-0.472543	-0.72745	-0.98324	-0.426488	-0.92899	-0.476564	-1.25	2.25497	0.278967	1.15054	1.44063	2.05705	2.12998	0.850284	2.33524	1.24472	2.17081	-0.463691	1.17179
IFITM1	0.643695	1.62395	1.16118	1.23866	0.0727346	0.696706	1.15109	0.398789	0.624541	0.546924	-0.259676	0.861632	0.604851	0.846792	0.54869	-0.0483318	1.15521	1.81336	0.673832	0.483852	0.267945	0.809314	0.689305	-0.75625	0.923961	0.832502	1.3639	0.980499	2.18373	1.54516	0.464282	-0.231003	-0.217673	0.463807	-0.493479	0.586757	-0.278277	1.80058	0.854197	1.26586	1.73574	1.7395	1.92157	1.23726	1.78746	1.12473	1.30158	0.408841	-0.177795
RAB13	0.560651	1.29207	0.971092	1.17999	0.0390721	0.933719	1.40881	-1.14315	1.28901	0.931015	-1.14315	1.04269	0.883672	0.906958	0.178564	-1.14315	1.35302	1.34141	0.88332	1.02044	0.688387	0.471196	0.456413	1.33759	0.66519	0.526937	1.42241	0.842937	1.64556	1.164	0.913877	0.434376	0.058687	-1.14315	-1.14315	0.60388	-0.262927	1.78979	1.13639	1.27316	1.35952	1.53609	1.58216	1.53256	1.51878	1.00144	1.67126	0.920366	-1.14315
RHOU	-1.43482	1.62755	-1.43482	-1.43482	-1.43482	0.228129	-1.43482	-1.43482	0.307437	0.679309	-1.43482	0.458843	-1.43482	0.761111	-1.43482	0.914834	-1.43482	1.48982	0.612131	-1.43482	-1.43482	0.806831	-0.85779	0.927379	-1.43482	0.940158	1.20633	0.866145	-0.0705367	1.08951	0.587171	0.534993	0.430526	0.577271	0.576719	0.500677	0.0840112	1.1062	0.877413	-0.912351	0.300941	0.43962	-1.43482	-1.43482	0.966703	1.04698	-1.43482	0.448031	0.826811
C20orf197	-1.15207	1.13374	-1.15207	-1.15207	-1.15207	-1.15207	-1.15207	-1.15207	1.01743	-1.15207	-1.15207	0.41208	0.570824	-1.15207	-0.596197	0.403949	0.530929	0.148928	-0.209332	-1.15207	0.122098	0.454323	0.728573	-1.15207	-0.399364	-1.15207	1.29031	-1.15207	-1.15207	0.705278	-0.26987	0.281944	0.645834	-1.15207	0.103202	-0.49762	-1.15207	-1.15207	-0.278656	1.24277	-1.15207	-1.15207	-1.15207	-1.15207	1.10561	-1.15207	-1.15207	-0.0394327	0.904762
DRC7	1.4959	-1.077	0.690165	-1.077	-0.511936	0.81427	-1.077	-1.077	-1.077	-1.077	-1.077	0.340793	1.47967	-1.077	-0.283809	-1.077	-1.077	-1.077	1.28433	-1.077	-0.314632	-1.077	1.03332	-1.077	1.50946	1.24769	-1.077	0.719476	0.302211	0.468803	-1.077	0.268628	1.05668	-1.077	-1.077	-0.442449	-0.272415	-1.077	0.0695653	2.14516	-1.077	-1.077	-1.077	-1.077	-1.077	-1.077	0.992471	-1.077	-0.201713
TTC8	0.770839	1.21696	0.556689	-1.56338	-0.995174	-0.0392323	0.603168	-1.56338	1.03449	-1.56338	1.11422	1.27327	0.886322	1.02072	0.512224	-0.31085	0.818602	1.24601	1.07478	-1.56338	0.325617	-1.56338	0.1542	0.554268	0.262434	0.724094	0.453008	0.547737	0.590615	1.1227	0.537938	0.585184	0.627534	-1.56338	0.738357	0.599174	0.926712	-1.56338	1.18068	-0.663878	1.41123	0.887683	1.0465	-1.56338	1.23642	0.940301	0.141343	0.486687	0.596352
CD63	0.775036	1.15155	0.486848	1.57761	0.424883	0.640503	1.5548	1.1065	1.14927	0.764797	-1.16127	0.578148	0.723753	0.837741	0.896927	0.89757	1.49869	1.4633	0.679658	0.756058	0.497335	0.382304	0.495537	-0.488245	0.67314	0.546317	1.73329	1.19606	1.95549	1.29282	0.274466	-0.121181	-0.904325	0.676261	0.160922	0.596157	0.206892	2.1672	1.07515	0.643261	1.39818	1.58472	1.8364	0.777989	1.77857	1.06524	1.58293	0.557909	-0.675172
PDE7B	0.660878	1.23109	0.201745	0.00976651	-0.405519	1.13435	0.0618397	0.33517	0.212558	0.64157	-0.459767	0.827018	-0.981966	0.301197	0.379281	0.186777	0.989644	0.991265	0.939858	0.731324	-0.0449947	0.26884	0.463335	0.0226922	-0.0303105	0.81886	-0.123897	0.409474	0.906454	1.27996	1.12343	-0.1586	0.424821	-0.315255	0.733433	0.871815	1.05422	1.29157	1.42572	-2.48661	0.196694	1.43869	0.412496	-0.0204968	1.07209	0.652209	-1.36109	-0.0845733	0.727699
RPRM	-0.54409	1.73675	1.5337	-0.54409	-0.54409	-0.54409	2.71521	1.67271	2.38119	-0.54409	-0.54409	-0.54409	-0.54409	-0.54409	-0.54409	-0.54409	-0.54409	1.53905	0.471222	-0.54409	1.49296	-0.54409	-0.54409	1.84302	2.02379	-0.54409	-0.54409	2.52523	2.40392	1.62541	-0.54409	-0.54409	1.14551	1.46844	1.56313	1.38144	0.537238	-0.54409	2.50302	-0.54409	1.53423	2.37514	1.85403	3.01053	2.99168	2.01126	0.684952	-0.54409	-0.54409
BISPR	2.66978	-0.49738	2.10501	-0.49738	-0.49738	2.33338	1.6747	-0.49738	1.96214	-0.49738	-0.49738	-0.49738	0.398814	-0.49738	-0.49738	1.25797	-0.49738	2.34524	1.3677	-0.49738	0.22635	1.23746	-0.49738	-0.49738	-0.49738	-0.49738	-0.49738	1.78985	0.467787	2.38194	1.58653	-0.49738	-0.49738	-0.49738	-0.49738	2.33262	-0.49738	3.87021	2.38135	2.44354	-0.49738	-0.49738	2.74671	2.09778	-0.49738	0.597381	-0.49738	-0.49738	-0.49738
GNAQ	0.284549	1.50041	0.312293	-1.7745	-0.0158608	-0.676828	-0.189119	-0.540228	0.704437	0.0652295	-2.48943	0.460792	0.469623	0.443875	-1.75152	0.205447	0.517353	0.376645	0.442577	-1.30144	0.190523	0.684108	1.08634	0.911159	-0.668475	-2.48943	-0.0705374	0.146364	0.471048	0.709612	0.208411	0.474749	0.327239	-1.78467	0.97612	0.378052	0.890944	1.94142	0.765588	-0.173045	0.33078	-0.460909	1.00445	0.71732	-0.0910689	1.10731	0.247027	0.255142	0.799153
MIGA2	-1.19625	-1.19625	0.676089	-1.19625	0.614172	-1.19625	-1.19625	-1.19625	-1.19625	0.354905	-0.649169	0.573964	-0.805433	0.822822	1.13704	0.163962	-0.689639	-0.219157	0.715343	1.27587	-1.19625	-1.19625	0.994571	1.33959	-1.19625	0.175348	-1.19625	0.0890209	0.748174	0.789442	0.577583	0.809846	0.825775	0.417643	1.45751	0.985693	1.34039	-1.19625	0.483344	-1.19625	1.23704	-1.19625	-0.35787	1.22237	-1.19625	-1.19625	-1.19625	-1.19625	-1.19625
STARD13	1.03698	-0.677741	1.94861	-0.677741	-0.677741	0.568226	-0.677741	-0.677741	2.018	2.56118	-0.677741	-0.677741	2.25149	1.4115	-0.677741	-0.677741	0.428461	-0.677741	1.0354	-0.677741	1.393	0.123788	0.0793781	1.58296	-0.677741	-0.677741	2.23698	1.03891	0.92755	0.729959	-0.0328879	1.14248	-0.677741	-0.677741	-0.677741	1.02374	-0.677741	-0.677741	2.07452	-0.677741	-0.677741	1.4025	-0.677741	1.24457	-0.677741	2.06985	2.27267	2.5406	1.70517
PLAAT3	2.00932	0.347794	1.03454	0.288068	0.227929	-0.469749	1.0529	0.0516278	1.59415	-0.881073	-0.774112	-0.0713033	-0.680216	-1.15033	-1.21368	-0.362965	0.0832515	1.54614	0.243382	0.133385	0.00848732	-1.28077	-0.773835	1.13546	0.535436	-0.0182098	0.0631774	1.36537	2.94836	0.175647	-0.30987	0.732873	1.02713	0.871193	0.0466491	-0.235656	0.800163	1.42304	1.17459	1.1941	0.663708	1.62399	1.03884	1.48876	2.34826	0.585837	1.37759	0.210738	-1.79921
SH3BP4	-0.539026	1.67024	-0.539026	0.185915	1.15911	-0.539026	2.74301	-0.539026	2.30621	-0.539026	1.39978	0.0151272	-0.539026	-0.539026	0.20921	-0.539026	-0.539026	0.285089	-0.539026	1.34462	-0.539026	-0.539026	-0.539026	-0.539026	-0.539026	-0.539026	2.4685	1.04322	1.96042	2.04803	0.0985978	-0.539026	-0.539026	-0.539026	-0.539026	1.97208	2.34611	2.15482	2.52084	-0.539026	2.91478	-0.539026	0.689131	1.5511	2.20077	-0.539026	2.68618	-0.539026	-0.539026
ZNF81	-0.556549	-0.556549	-0.556549	-0.556549	-0.556549	-0.556549	2.2409	-0.556549	-0.556549	-0.556549	-0.556549	2.08045	-0.556549	1.97145	-0.556549	-0.556549	-0.556549	-0.556549	1.10246	1.33265	2.02948	-0.556549	-0.556549	-0.556549	-0.556549	-0.556549	-0.556549	0.807411	-0.556549	0.310321	0.277053	-0.556549	-0.556549	-0.556549	-0.556549	-0.556549	0.438833	-0.556549	0.980467	-0.556549	1.69136	-0.556549	-0.556549	-0.556549	-0.556549	0.853406	2.63837	2.73572	-0.556549
DAND5	1.63605	-0.836801	-0.836801	-0.836801	-0.836801	-0.836801	-0.836801	0.0241904	1.20857	-0.167325	-0.836801	1.08563	1.12809	0.358193	1.55907	-0.836801	-0.836801	0.742268	1.20103	0.518053	1.721	-0.836801	-0.836801	-0.836801	0.245352	1.27334	-0.836801	1.73753	0.802814	-0.836801	0.694421	-0.836801	0.244525	-0.836801	-0.836801	-0.836801	-0.836801	-0.836801	0.890701	1.38632	-0.836801	-0.836801	-0.836801	-0.836801	-0.836801	1.91732	-0.836801	1.19543	-0.836801
HEG1	-0.633695	-0.633695	0.0408912	-0.633695	-0.633695	0.756629	-0.633695	-0.633695	2.30506	-0.633695	-0.633695	1.8721	0.624701	-0.633695	1.9547	1.33851	2.72639	0.948135	1.44011	-0.633695	0.0103064	-0.633695	-0.633695	-0.633695	-0.633695	-0.633695	-0.633695	2.09245	1.62399	1.30471	0.590954	0.537658	-0.633695	2.61428	0.228883	0.502979	1.21635	-0.633695	1.82447	0.766176	-0.633695	0.819276	-0.633695	-0.633695	1.35842	2.6218	-0.633695	1.90184	-0.633695
ZNF703	0.99723	0.425793	-0.929609	1.0047	-0.929609	1.00428	-0.929609	0.681685	-0.929609	1.4293	-0.929609	0.965011	0.988841	-0.929609	-0.378489	1.05431	1.34027	1.54501	1.133	-0.929609	0.921232	-0.929609	-0.929609	-0.929609	-0.929609	1.33994	-0.929609	1.05799	1.37412	1.38378	1.33471	0.492148	-0.43216	-0.929609	0.484517	1.09922	-0.929609	1.91328	1.71849	1.44477	-0.929609	-0.929609	1.95063	-0.929609	1.43992	2.04048	0.982081	-0.929609	1.76672
GLYCTK	-1.02067	-1.02067	1.33633	-1.02067	-1.02067	-1.02067	-0.327433	0.355367	0.885285	1.2012	-1.02067	1.06226	-1.02067	1.29831	-1.02067	-1.02067	1.25607	0.942293	0.517288	0.96828	1.30157	1.02429	1.14704	-1.02067	0.624567	-1.02067	-1.02067	0.548855	-0.383747	0.747495	1.03865	0.984136	0.522815	-1.02067	1.02947	-0.43056	-0.510649	-1.02067	0.219068	-0.566601	1.65844	-1.02067	-1.02067	1.01019	-1.02067	-1.02067	0.71795	0.753437	1.63575
TNS2	1.23927	1.35277	-0.169144	1.58472	-0.890508	1.45057	1.66284	0.583002	1.38445	-0.890508	-0.890508	1.64517	1.57208	1.49407	0.486739	-0.49677	1.41905	1.82872	1.20278	0.647321	0.779939	1.12449	-0.890508	-0.890508	0.416664	-0.890508	1.72595	0.673602	0.905255	1.43368	1.23761	-0.498868	0.320205	-0.890508	0.671923	-0.312524	0.887303	2.21713	1.56301	1.60595	1.45565	0.982231	1.43395	-0.890508	1.70659	1.18718	1.42775	-0.890508	0.477376
MX1	1.30028	-0.123994	1.55905	0.297773	-0.822811	-0.822811	1.35294	1.55782	1.26336	0.0427334	-0.822811	1.49901	0.487457	1.71837	1.17889	1.80118	1.4812	1.79315	1.3342	-0.822811	-0.822811	0.512794	-0.822811	-0.822811	1.18379	1.06044	1.41941	1.09793	1.6095	1.49466	0.903015	-0.822811	0.641154	1.48248	-0.822811	-0.822811	-0.822811	1.94976	1.32431	1.57127	-0.822811	0.925902	1.4161	1.07824	-0.822811	1.18818	1.3935	-0.309981	-0.822811
RNF150	0.874367	0.39833	0.0343182	-0.223815	0.221365	0.451352	0.0728818	1.26851	0.511177	0.866296	-0.541351	0.664629	0.18808	-0.331102	0.482173	0.388894	-0.0923794	0.871502	0.817308	-0.088232	-0.50518	-0.0795591	0.435419	-0.188519	0.561405	0.948381	1.03118	0.681504	0.676895	0.128377	0.323242	0.138658	0.764608	1.12556	0.442516	0.734525	0.000534818	-2.97203	0.581819	-1.43812	0.286132	-2.97203	-0.283752	-2.97203	-2.97203	-0.881878	-0.0831867	-0.319534	-0.300376
RPL39	2.39915	1.56645	1.14022	1.0523	-0.42347	0.458726	1.68117	0.867613	1.52312	0.672263	0.826887	0.391799	0.0729686	0.747897	-0.75853	0.096056	0.450621	1.13405	0.174869	1.25687	0.40375	-0.0542012	-0.0140404	0.550675	1.27615	-0.196251	0.774231	0.437271	2.77727	0.543902	-0.352269	-0.963375	-0.557148	0.066168	-0.510835	-0.0193148	-0.404598	1.93777	0.0975411	1.7342	1.63252	1.88691	2.03247	0.905386	2.13441	1.77971	1.61424	-1.2091	-0.223366
GPC6	-1.57438	1.17649	0.707374	-0.397605	0.303211	0.745487	-0.640595	-1.57438	1.06062	1.507	0.779081	0.884065	0.624428	0.232835	0.108112	0.615986	0.81855	0.282439	-0.0459166	-0.270491	1.15149	-0.318884	1.05057	-1.57438	0.50575	-0.467929	0.0511821	0.860503	-0.366027	-0.195213	1.32456	0.91978	0.15988	-1.57438	0.734885	0.544124	0.0347152	-1.57438	1.31162	0.382586	0.727054	-1.57438	-1.57438	1.81452	0.111285	1.144	1.22705	0.175818	0.136013
RBP1	2.25564	1.8875	0.858223	0.88913	0.461228	-0.197032	1.92374	1.51188	1.76821	0.448105	-0.0454639	0.316809	0.475238	0.748522	0.409025	-0.0982249	1.02664	2.21948	0.903539	1.16354	0.29431	-0.049882	0.120534	0.459411	1.5923	1.15358	1.67927	1.15854	2.96687	1.86757	0.327035	-0.330498	-1.03536	-0.0681402	-1.88335	0.85989	-0.623031	2.33175	1.28658	0.00745837	1.02804	0.958226	1.24053	0.762444	0.685476	2.10606	1.88446	0.786213	-0.830365
ZNF45	-0.917579	-0.0726592	-0.917579	-0.917579	-0.917579	-0.917579	-0.917579	1.42645	-0.917579	1.13543	0.707518	-0.453091	1.07771	0.987408	-0.917579	0.876459	0.194375	-0.917579	-0.917579	-0.917579	-0.917579	-0.917579	-0.917579	-0.917579	-0.917579	-0.917579	1.63455	-0.917579	-0.917579	-0.917579	0.803162	0.0306661	-0.917579	1.69395	0.0682724	-0.917579	0.0186649	-0.917579	0.915955	0.696572	1.02936	-0.917579	-0.917579	1.48116	-0.917579	-0.917579	-0.917579	1.45478	0.452966
SLC38A1	-0.397871	-0.397871	-0.397871	-0.397871	2.54276	-0.397871	3.18375	-0.397871	-0.397871	-0.397871	-0.397871	-0.397871	-0.397871	2.24874	-0.397871	2.09936	-0.397871	2.33392	3.38693	-0.397871	1.24292	0.492062	-0.397871	-0.397871	-0.397871	-0.397871	-0.397871	-0.397871	1.38447	2.06734	-0.397871	-0.397871	0.360489	-0.397871	-0.397871	-0.397871	0.457058	-0.397871	2.54547	-0.397871	3.44981	0.939424	-0.397871	-0.397871	3.28207	-0.397871	1.99169	2.78025	-0.397871
SGCE	1.28582	0.784803	0.200846	-0.279101	-0.252612	0.611829	-0.959811	-0.236763	-0.655032	0.66899	-0.407715	0.494526	0.355046	-1.30792	-0.521811	0.171252	1.3236	0.863519	1.14041	-2.24097	0.507889	0.88532	0.139032	-0.0573133	-0.487342	-2.55571	0.022504	0.496257	-2.27249	0.064669	0.629992	0.813622	-0.361363	-0.172283	0.516838	0.694238	-0.405934	1.71015	1.00475	0.0606666	-0.335034	0.587838	0.255835	-1.49722	0.252655	0.884992	1.0972	1.09321	-0.480225
MARVELD2	-1.67417	0.968768	0.919582	0.929016	0.410858	0.693625	0.6915	-1.67417	-0.343897	-1.67417	0.550826	0.546436	0.756428	0.430326	1.01536	0.0669547	0.325343	-1.67417	0.729921	-0.472919	-0.0939735	0.56664	-1.67417	0.498769	0.761288	-1.67417	-1.67417	0.629005	0.0170921	-0.517086	0.117494	0.824404	0.899446	-1.67417	-0.135241	-1.67417	0.623858	-1.67417	0.801965	1.1544	-1.67417	-1.67417	0.0713844	-0.969352	0.347463	-1.67417	-1.67417	0.475835	0.513268
STAR	1.87431	0.913357	-2.22427	1.10499	-0.0102546	0.169152	0.349685	0.667656	0.0818611	0.89684	0.425914	0.876218	0.31279	0.727076	0.524694	0.100499	0.850775	1.32487	0.379234	0.520546	1.27775	0.341161	0.449762	-0.0582747	1.36483	0.979522	1.85847	-0.495172	0.107507	1.26723	0.761305	-0.117185	-1.08152	0.765118	-0.543178	0.857082	-1.76776	1.34279	0.86893	0.551298	2.09585	2.51595	2.0069	1.33926	2.88076	1.29921	1.53154	0.652165	-0.673784
TCEAL3	1.22894	0.863241	1.3986	1.38775	0.245664	0.330466	1.61471	0.659961	1.13644	0.616204	-0.142612	1.06184	0.692915	0.490432	0.98271	0.582838	0.802709	1.3646	1.22664	0.74996	0.75366	0.205059	0.633821	0.981478	1.18466	1.04579	0.781417	0.637415	1.11827	1.0091	0.548204	-0.688499	-0.163349	-0.310846	0.176794	-0.026098	0.250573	1.0122	1.40969	1.17192	1.40431	1.47263	1.50336	1.05167	0.695549	1.248	1.5713	0.532462	-0.00389981
ZNF395	-0.228358	1.12381	0.430088	-1.16143	0.196561	-0.424146	1.13017	-0.342882	0.333076	-0.216551	-0.232741	0.00674618	0.816741	0.186637	-2.43259	0.793725	0.208977	0.94638	0.724273	-2.34882	-0.0965716	-1.50519	0.973408	-1.29777	-0.360961	0.889954	-0.874487	0.701726	0.338734	0.698702	0.357401	-0.24142	-0.693718	-0.147465	-0.400137	0.754783	0.295246	1.35775	1.12444	1.25025	0.783409	0.200852	0.875983	-3.15481	0.316033	0.901193	1.01059	-0.0966522	0.249691
ZNF71	-1.17368	0.656617	-1.17368	-0.426382	0.695624	-1.17368	-1.17368	1.28434	0.400655	1.0569	1.21792	0.602813	-0.295651	-1.17368	1.2662	-1.17368	0.282177	1.23301	0.798943	-1.17368	0.576467	0.882843	0.866799	-0.506341	0.487258	-1.17368	-1.17368	0.893671	0.243332	0.64679	1.03389	0.892313	0.164979	0.73811	1.1287	-1.17368	0.693272	-1.17368	0.67636	1.14469	0.0238812	-1.17368	-1.17368	-1.17368	-1.17368	-1.17368	-1.17368	1.14639	1.26804
SVIL	1.31604	0.55682	0.966648	0.318628	1.20448	-0.191119	1.38445	-0.331824	0.979208	0.656711	0.270515	0.475077	1.07935	0.663129	0.865897	0.447661	0.735134	1.37549	0.714371	-0.177883	0.806054	-0.779321	0.886384	0.781601	0.615899	-0.575215	-0.391703	-0.243457	-0.593446	0.98511	0.630419	0.809918	-0.925661	0.152482	0.617784	0.783547	0.244871	1.99445	1.04469	1.14967	1.38788	-0.742092	1.20806	-0.102769	0.936583	1.4277	0.281167	0.822954	0.637938
ARSD	2.13	-0.606282	1.84565	1.33519	1.35568	1.3617	2.20608	-0.606282	2.05747	-0.606282	-0.606282	-0.606282	-0.606282	0.0168185	-0.606282	-0.606282	-0.606282	-0.606282	2.00502	1.87865	-0.606282	-0.606282	-0.606282	0.267701	-0.606282	-0.606282	-0.606282	1.449	2.28734	1.72816	0.857513	-0.0618032	-0.606282	-0.606282	1.08236	1.87419	0.62649	2.21943	1.93043	2.01968	1.67431	0.860981	2.12771	-0.606282	2.26806	-0.606282	-0.606282	-0.606282	-0.606282
COL4A4	-1.33202	-1.33202	-1.33202	0.422761	1.10568	0.0403451	0.249559	-1.33202	1.05714	0.936627	-1.33202	0.209884	0.403669	0.719396	1.0636	-0.861905	-1.33202	-1.33202	1.54377	-1.33202	0.484028	0.754752	0.0510694	0.676142	-1.33202	1.27974	0.652054	1.45629	1.21688	0.715572	1.45718	1.0022	1.54861	-0.772198	1.41558	0.966891	1.78749	-1.33202	1.4098	1.19329	0.737357	-0.0719026	-1.33202	0.73362	-1.33202	-1.33202	-1.33202	0.936486	-0.0511005
SLC44A5	-0.441913	-0.441913	-0.441913	-0.441913	1.16937	-0.441913	2.77799	-0.441913	2.12071	-0.441913	-0.441913	0.996628	0.22601	-0.441913	-0.441913	-0.441913	-0.441913	-0.441913	1.84035	-0.441913	-0.441913	-0.441913	0.843315	-0.441913	-0.441913	-0.441913	-0.441913	-0.441913	1.79189	1.4745	-0.441913	-0.441913	-0.441913	-0.441913	-0.441913	-0.441913	-0.441913	-0.441913	1.93712	2.93809	2.96413	3.41438	3.28651	-0.441913	1.43477	-0.441913	-0.441913	-0.441913	-0.441913
VDR	-0.373341	-0.373341	-0.373341	-0.373341	-0.373341	0.847915	-0.373341	-0.373341	-0.373341	-0.373341	-0.373341	-0.373341	-0.373341	-0.373341	-0.373341	3.07153	-0.373341	-0.373341	2.79972	-0.373341	-0.373341	-0.373341	3.0498	-0.373341	-0.373341	-0.373341	-0.373341	2.23632	2.72632	1.10983	-0.373341	-0.373341	1.95944	-0.373341	-0.373341	-0.373341	-0.373341	-0.373341	2.66612	-0.373341	-0.373341	2.78553	-0.373341	-0.373341	-0.373341	-0.373341	-0.373341	-0.373341	-0.373341
FEZ1	-1.42561	0.326638	0.861877	0.960175	0.478158	1.32753	1.86609	0.305475	0.512525	0.708119	0.592317	1.09116	0.776135	-1.42561	-1.42561	0.0425209	1.29091	0.570264	1.08879	0.159221	-0.161934	0.624972	0.535486	0.379527	-1.42561	-1.42561	1.3415	1.25835	0.673088	0.788516	0.470016	0.539901	-0.00948566	0.992067	0.594995	0.842	0.648637	-1.42561	1.17523	0.606057	-1.42561	0.842499	-1.42561	1.11991	0.432963	1.13445	1.43932	0.659748	0.387225
DLC1	-0.720007	-0.720007	-0.720007	-0.720007	-0.720007	-0.720007	1.30301	-0.720007	1.42265	-0.720007	-0.720007	1.78642	0.617626	1.28987	-0.125975	-0.720007	1.92748	1.08233	1.64033	1.4163	1.43742	-0.720007	-0.720007	1.11747	-0.720007	-0.720007	1.75211	1.51475	1.66325	0.662005	0.0463721	0.938644	0.998825	-0.720007	1.08368	-0.720007	-0.720007	1.73939	1.66163	0.0860399	2.07257	-0.720007	1.78905	1.88593	-0.720007	-0.720007	-0.720007	-0.720007	1.88155
AMOTL2	-0.510313	-0.510313	2.66062	-0.510313	2.77332	-0.510313	1.77081	-0.510313	2.53812	-0.510313	-0.510313	2.29639	0.324634	-0.510313	0.197313	2.07398	3.07147	-0.510313	-0.510313	1.36654	-0.510313	2.06774	-0.510313	-0.510313	-0.510313	-0.510313	-0.510313	1.74422	-0.510313	-0.510313	-0.510313	-0.510313	-0.510313	-0.510313	1.30539	-0.510313	2.07867	-0.510313	2.3067	1.78208	-0.510313	1.01095	2.23115	2.8306	0.616036	0.50963	-0.510313	-0.510313	-0.510313
BACE1	-1.11192	-1.11192	-1.11192	0.237287	-1.11192	-0.0196019	0.00565591	-1.11192	1.54492	-1.11192	-1.11192	1.39522	0.642092	1.38756	1.24318	0.882912	-1.11192	1.2559	0.0668039	0.0136514	0.61894	1.39461	0.769087	0.79642	-1.11192	-1.11192	1.13295	0.468649	0.552426	1.44694	0.726442	1.17713	1.01536	-1.11192	1.00829	0.804845	0.998652	-1.11192	1.00782	0.388077	1.184	-1.11192	0.639664	1.59714	-1.11192	-1.11192	-1.11192	-1.11192	-1.11192
DAG1	-0.230784	0.717588	0.537268	-0.203897	0.149859	0.66776	1.13884	0.887972	0.762389	-0.55857	-1.47417	0.60497	0.435909	0.50298	-1.47417	1.03103	-0.929922	0.874036	0.256585	0.781146	0.877784	0.502633	-0.925164	0.874952	0.985918	-0.266142	-1.47417	1.19241	1.39512	0.846901	0.561534	-0.0167435	0.591563	-0.527689	0.908873	0.955662	1.03952	1.79723	0.85974	-0.977075	1.33812	-1.47417	-1.47417	-1.47417	1.0253	0.681955	-1.47417	1.12912	1.01036
ALDH1A1	0.539526	1.39296	1.57613	0.957442	0.883883	0.725683	1.31172	0.986296	1.22655	0.595135	0.949985	1.59146	1.43144	1.34764	1.06	0.931523	1.49611	1.32822	1.08673	-0.262908	1.10705	0.903	0.86872	0.0578421	1.25658	0.0761885	0.83072	-0.829424	0.565871	1.15609	1.0678	-0.381432	0.179882	0.775049	0.791119	1.08818	0.629634	1.2776	1.718	0.496032	1.44637	1.2023	1.28238	1.21115	-0.528438	1.86654	1.07859	0.505004	-1.25948
EID1	1.12585	0.424546	0.673532	1.27236	0.707237	0.767291	1.85675	0.961209	1.07633	0.441606	-0.141166	1.17094	0.579208	1.18769	0.8885	0.619552	1.66658	1.77247	0.216326	-0.36749	0.0962561	-0.308853	0.298155	0.700877	0.505039	0.800605	1.04655	0.454221	0.537293	1.51479	0.283375	0.158455	-0.0680546	0.0454908	-1.47265	0.336236	-0.035143	1.8965	1.29637	0.972189	0.880579	-0.979763	1.9365	1.39317	0.182115	1.41952	1.71908	0.081846	-0.621301
AC091271.1	1.98146	-0.776348	-0.776348	-0.776348	0.507738	-0.776348	-0.776348	1.8693	1.81794	-0.776348	-0.776348	1.21867	-0.776348	-0.776348	1.42781	0.662533	-0.776348	-0.776348	0.630629	1.22353	0.710915	-0.776348	-0.776348	-0.776348	-0.776348	1.89161	-0.776348	1.31857	0.869316	-0.776348	0.88598	1.47561	0.661248	-0.776348	1.46838	1.03143	1.19288	-0.776348	0.538531	1.67556	-0.776348	-0.776348	-0.776348	-0.776348	-0.776348	0.226363	0.89071	-0.776348	0.743898
SLC44A2	-0.919959	-0.919959	-0.101022	1.36784	-0.919959	-0.420536	1.92937	-0.919959	1.32149	-0.2701	-0.919959	1.51394	1.17062	0.463132	-0.919959	0.603573	1.41017	1.12147	1.08725	1.42641	0.695368	0.440328	-0.919959	-0.919959	-0.919959	1.65042	-0.919959	0.63849	1.57066	1.32944	1.55257	-0.919959	0.454518	-0.919959	-0.919959	-0.919959	-0.919959	2.14564	1.55834	1.34704	-0.919959	0.61215	0.502941	1.0441	0.722781	1.6547	-0.0816982	1.58561	1.09366
CHST3	1.0717	1.26791	-0.563938	-0.563938	-0.563938	2.22916	2.27108	-0.563938	1.65769	1.97792	0.932659	1.45226	-0.563938	-0.563938	-0.563938	0.939846	-0.563938	2.09701	2.1043	1.67965	2.03394	-0.563938	-0.563938	-0.563938	2.64505	-0.563938	-0.563938	1.35234	2.17567	0.0126824	-0.563938	1.06059	0.023377	-0.563938	1.04596	-0.563938	0.611347	3.43537	1.44466	-0.563938	-0.563938	2.93253	1.0973	-0.563938	2.37885	-0.563938	-0.563938	-0.563938	-0.563938
DUSP6	-0.437328	-0.437328	-0.437328	-0.437328	1.68102	-0.437328	2.23434	-0.437328	-0.437328	-0.437328	-0.437328	-0.437328	1.8467	-0.437328	-0.437328	-0.437328	2.81312	2.0479	-0.437328	-0.437328	-0.437328	-0.437328	-0.437328	-0.437328	-0.437328	-0.437328	-0.437328	1.68028	1.3059	-0.437328	2.25688	-0.437328	-0.437328	-0.437328	1.22677	1.57756	-0.437328	-0.437328	2.10794	-0.437328	-0.437328	1.14689	3.69198	-0.437328	-0.437328	-0.437328	-0.437328	-0.437328	-0.437328
EXOC7	0.251422	1.15649	-0.075576	-1.50132	0.574255	0.301821	0.377364	1.00299	0.33968	0.918697	0.307706	0.833912	-0.0946964	0.714034	0.105515	-0.601063	0.543798	0.0423803	0.476427	-0.638111	0.751316	0.624972	-2.86053	0.625972	0.711023	0.129493	0.0323535	0.31626	-0.761951	0.150485	-0.350091	0.358962	0.385012	-0.0670964	0.180717	0.472104	0.741959	0.689807	0.7046	0.481165	-0.174244	-0.819707	0.124693	-0.714493	-1.69831	0.778715	0.693785	0.883406	-4.42337
MT2A	0.853605	2.79304	-1.19426	1.42466	-1.19426	-1.19426	1.92435	0.43001	1.46719	0.859892	0.104023	1.04481	-0.158261	-0.167934	0.160641	-0.439797	1.43514	1.79083	0.315656	1.29972	-1.19426	0.210222	-1.19426	0.117438	0.171451	1.52186	2.39219	0.933398	1.75134	1.49716	-0.218383	-0.443132	-1.19426	-1.19426	-1.19426	-1.19426	0.546322	0.734331	0.545699	-0.637209	1.2922	1.36619	1.55897	-1.19426	1.71387	1.18961	1.1278	-0.586341	-0.195671
ZNF311	-0.352803	-0.352803	-0.352803	-0.352803	-0.352803	-0.352803	-0.352803	-0.352803	1.50756	-0.352803	-0.352803	1.96635	-0.352803	-0.352803	-0.352803	3.20358	-0.352803	-0.352803	-0.352803	-0.352803	-0.352803	-0.352803	-0.352803	-0.352803	-0.352803	-0.352803	-0.352803	0.748623	1.75244	-0.352803	-0.352803	-0.352803	-0.352803	-0.352803	-0.352803	3.80265	-0.352803	-0.352803	1.4954	-0.352803	-0.352803	-0.352803	-0.352803	5.07841	-0.352803	-0.352803	-0.352803	-0.352803	-0.352803
CD40	-1.00147	-1.00147	1.35873	-1.00147	-0.456206	-1.00147	1.05426	-1.00147	0.647855	-1.00147	1.4497	0.880316	0.864841	0.779233	-1.00147	0.856552	1.04199	1.18948	1.45692	0.00295937	0.505917	-1.00147	-1.00147	1.03069	1.58702	-1.00147	1.18525	0.908198	0.228835	1.19015	0.46236	0.48258	1.22044	-1.00147	0.653772	0.420567	1.03382	0.128964	1.4721	-1.00147	0.863445	-1.00147	-1.00147	-1.00147	-1.00147	1.52381	1.10858	1.22932	-1.00147
VSIG10	-1.5615	-1.5615	-1.5615	-1.5615	-0.290857	-0.556381	-1.5615	-0.936902	-0.894909	-0.849708	0.155542	0.916006	0.728329	-1.5615	1.05637	1.22554	0.495928	1.23908	0.117378	0.250791	0.966453	0.254571	-1.5615	1.2271	-0.410945	1.30957	0.978924	0.314579	-0.117445	1.3171	0.419205	-0.302931	1.17434	-0.508544	0.00484813	0.999884	0.547588	0.512102	0.832402	-0.548345	-0.818885	-1.5615	-0.00298975	0.14372	-1.5615	-1.5615	-1.5615	0.2401	-0.0150123
SLC15A3	-0.459711	-0.459711	-0.459711	-0.459711	-0.459711	-0.459711	1.05156	-0.459711	2.81245	-0.459711	-0.459711	1.9494	0.143323	-0.459711	-0.459711	1.36172	-0.459711	2.39357	2.90084	-0.459711	-0.459711	-0.459711	-0.459711	-0.459711	-0.459711	-0.459711	-0.459711	0.639204	2.33305	2.1056	0.968359	0.169025	-0.459711	-0.459711	-0.459711	-0.459711	-0.459711	-0.459711	1.02992	2.95925	3.13482	-0.459711	2.53569	-0.459711	1.50804	-0.459711	3.07036	-0.459711	-0.459711
CPLX4	-0.897624	-0.897624	-0.897624	1.57943	-0.897624	1.17643	-0.897624	0.916927	0.560271	-0.897624	1.09308	-0.897624	-0.897624	1.14269	-0.897624	0.756433	-0.897624	1.09229	-0.897624	-0.897624	-0.897624	0.945874	0.957828	-0.897624	1.13452	-0.897624	-0.897624	1.34707	-0.190459	0.80179	-0.897624	0.538013	-0.897624	-0.897624	1.11121	-0.897624	-0.897624	-0.897624	0.286228	1.02318	-0.897624	1.60043	-0.897624	1.03452	1.33154	1.56826	-0.897624	-0.0862687	-0.897624
CYBC1	-0.117858	0.50062	0.109521	0.313805	0.834903	0.805183	-1.01377	0.150089	0.41303	0.398465	0.0230277	0.192347	0.270528	0.0265369	0.419586	-0.0843727	0.358261	0.213684	-0.756009	0.374353	-1.11472	0.249135	-0.0779817	0.575632	0.95199	-3.14718	0.275742	0.613614	-0.974009	0.411185	0.277425	0.317373	0.267825	0.180186	1.00383	0.822392	0.338068	0.775553	0.812725	-0.548982	-0.315587	-0.44652	1.06588	0.519891	0.365135	0.471462	0.870244	0.274973	0.490038
DUXB	0.534614	0.410872	0.256831	-2.95366	0.0720366	0.391188	-2.95366	-0.0312361	0.575208	-0.275682	0.524404	0.84157	0.0138227	0.640804	-1.20808	-0.930748	-0.534202	0.316382	0.255039	0.0267882	0.466261	-0.961521	0.64692	-0.093824	-0.207683	0.760997	1.17676	0.0469015	-1.38382	0.477461	0.443794	0.453917	0.398919	0.280295	0.00690782	0.553985	0.436344	-2.95366	-0.566454	-0.00421466	-0.224879	0.703332	0.0106563	0.307372	0.417168	-2.95366	-2.95366	0.689138	0.256776
MED18	-0.960897	0.567621	-0.960897	-0.960897	0.169227	1.11959	-0.960897	-0.960897	1.17505	0.252084	-0.379363	-0.960897	1.0757	-0.960897	-0.960897	0.484977	-0.422382	-0.960897	0.532316	-0.960897	-0.443554	-0.123321	-0.960897	-0.960897	-0.960897	-0.960897	0.818876	1.28414	-0.960897	-0.960897	1.28801	1.44753	0.646018	-0.960897	1.34497	1.16851	1.04503	-0.960897	1.41399	-0.960897	-0.960897	-0.960897	1.30525	1.11568	-0.960897	-0.960897	-0.960897	-0.000544738	1.45878
BORCS5	0.689027	-1.66149	0.405711	-0.666985	0.162462	-1.15365	-0.194742	1.05003	-1.15714	0.0344771	0.460587	0.865689	0.0188907	-0.0309968	0.510784	0.325824	-0.360606	-0.936918	-0.0790788	1.21434	0.640634	0.83911	0.208125	-0.184046	0.919796	-0.209032	-0.176902	0.731302	-0.446434	-1.11579	-0.416313	0.0215219	-1.52833	-0.265778	0.263266	-0.370253	0.241445	-1.92004	-1.32457	-0.843501	-1.42614	-4.3724	-5.44561	-0.607936	-0.68012	-0.607279	-2.95197	0.813813	0.826363
GAK	-0.846265	-0.055109	0.608542	0.0242252	-0.326478	0.225838	-0.118553	-2.93368	0.573781	0.070021	-1.77556	-0.0183561	0.3937	1.14827	-1.56328	-1.22113	0.66851	0.886911	0.111607	-1.43348	0.381606	-5.18589	-0.682073	-0.872287	0.417076	0.381456	-1.43715	-0.0822786	0.0624999	-0.923796	-0.0032952	-0.191846	0.771806	-1.48956	-0.142927	-0.118761	0.112246	-5.18589	0.310743	0.279475	-0.73425	-0.772802	0.233926	-0.159671	-0.504291	0.10503	-0.452119	0.437243	0.0071576
RRP7BP	-1.1241	-1.1241	-0.0146084	1.2323	-1.1241	-0.0984318	1.86589	-1.1241	1.51972	1.55672	-0.456892	0.514529	1.55413	1.14042	-1.1241	0.378566	2.15917	0.431903	1.48339	1.40244	0.0924115	0.903018	0.811322	-1.1241	-1.1241	-0.413613	0.161584	0.443388	1.1545	1.59392	-1.1241	0.311298	0.412148	-1.1241	1.42381	1.10904	0.639202	-1.1241	2.19086	-1.1241	1.79407	-1.1241	0.850171	-0.418235	1.33413	1.82499	-1.1241	-0.508246	0.924275
CSE1L	-1.06242	0.0333417	-0.839852	0.269608	-0.175343	1.17975	-1.18434	-0.138577	0.85297	-1.53357	-1.35746	-0.104614	0.168057	-0.140198	-0.532941	0.172063	0.64685	-0.980412	-0.520959	-2.01032	-0.896967	-0.663027	-0.285805	-0.380356	-1.99143	0.0869005	-1.24693	-1.80763	-0.83886	0.51293	-0.315977	-0.473201	-0.168793	-1.05648	-0.331599	-0.670182	-0.549039	-0.76565	-1.2304	0.590156	0.437765	1.36082	0.44843	0.615176	0.485848	-0.00568695	-1.98625	-0.428109	0.195747
CRISPLD1	-2.42748	0.526322	-1.11025	0.389297	0.44563	0.281753	-1.69539	-2.51168	0.108622	-1.10009	-0.986468	-0.114607	0.0361323	-0.372551	-1.21525	-0.179164	0.593111	0.743254	-0.409566	-0.544446	-0.64132	-0.706731	-0.173726	-1.71973	-4.06642	-1.20313	0.0101306	-1.15463	-1.36339	0.336002	0.0209897	0.220605	-0.0175741	-0.803553	0.413615	0.00276469	-0.340054	-2.04295	0.195915	0.514118	-0.320731	0.771116	-0.717596	0.462359	-0.0848829	-1.25285	-5.40773	0.311103	0.739592
AC019117.2	0.587823	0.362466	0.902346	0.217017	0.285281	-1.96224	-1.96224	-1.96224	0.00472748	0.950201	0.815864	-1.53558	0.198738	0.0102298	0.995741	-1.96224	0.727841	0.0977369	1.17015	0.135255	0.798712	0.59915	0.805918	1.16692	1.05266	0.666334	0.607103	0.754982	0.256676	-1.96224	0.218472	1.05877	0.937011	0.447587	0.596615	0.676133	0.601127	-1.96224	0.422389	-1.96224	-1.96224	-1.96224	-1.96224	0.741238	0.582776	0.330129	-1.96224	0.053514	0.169427
GFM2	-5.475	0.70266	-1.84318	0.299146	0.177006	0.759626	-3.49264	0.423698	-0.482434	-0.532025	-0.671727	-0.0386899	0.345599	-0.262429	-1.64677	0.0354923	-0.0589715	0.439118	-0.778943	-2.61125	-1.02665	-1.07047	0.0129496	-0.731441	-0.360751	-0.758072	0.362287	-1.10573	-2.52279	-0.389888	-0.343316	-0.174821	0.0633526	-0.172418	-0.243015	-0.835378	0.217021	-0.216268	-0.532613	0.928721	0.234569	0.451899	-0.282423	0.135189	0.394173	0.688934	-0.945363	-0.177254	-1.64976
CRHBP	1.93661	2.76807	-0.730336	-0.730336	-0.730336	1.04225	-0.730336	-0.730336	-0.730336	1.77066	-0.730336	-0.730336	-0.259964	1.13692	2.09421	-0.730336	0.929748	0.805236	1.30154	1.55907	1.30557	0.412841	1.76863	-0.730336	1.88727	-0.730336	-0.730336	1.26002	-0.730336	-0.730336	0.956322	0.444939	0.848775	-0.730336	0.484862	0.303551	1.15396	-0.730336	-0.0644114	1.13024	-0.730336	2.25321	-0.730336	1.29558	-0.730336	-0.730336	-0.730336	1.77162	-0.730336
GCNT3	-2.46817	0.443859	-0.723704	0.0164782	0.394014	0.0682549	-1.02479	-0.202885	-0.334717	-4.39194	0.790611	0.807051	1.01358	-0.0634173	0.488516	0.742369	0.325884	0.250159	0.0531725	-1.87917	0.556558	0.558448	0.435918	0.317195	0.209354	0.201885	0.427654	-1.08871	-1.17096	0.158205	0.344218	-0.326348	0.556207	0.4434	0.274308	-0.00963726	0.627802	-6.75618	-0.456078	-0.0791127	-0.92594	0.0136101	-2.18853	0.478856	-0.422239	-0.0902924	-1.43915	1.01941	1.00757
IFT57	-0.00253234	-1.79315	1.33986	-0.577369	1.22943	-0.618224	-1.23622	1.16447	-1.10518	0.432011	-1.38488	0.679444	-0.68971	-0.528006	0.599727	-0.043283	0.442679	-0.906102	-0.0411077	-0.507089	0.477873	0.68273	0.486227	-0.892511	0.836332	-0.0190547	-0.612497	0.0822103	-4.27177	-0.138734	0.421781	0.455151	0.698875	1.55395	-0.137626	1.02909	0.6594	-1.07403	-1.27125	0.475654	-0.919025	-3.48924	-0.300698	-0.630557	-1.00005	-2.23079	0.404576	0.110757	-0.204481
AL603783.1	-0.877079	-0.877079	-0.877079	-0.877079	-0.877079	-0.877079	-0.877079	-0.877079	-0.877079	-0.877079	-0.877079	-0.877079	1.10625	-0.877079	0.00370158	-0.877079	-0.00347121	-0.877079	0.616692	-0.877079	0.368774	0.968832	0.694439	-0.877079	-0.877079	-0.877079	-0.877079	1.65395	-0.877079	-0.0965502	0.259244	-0.174427	-0.877079	-0.877079	-0.877079	-0.877079	-0.877079	-0.877079	1.84181	2.39444	-0.877079	-0.877079	-0.877079	-0.877079	-0.877079	-0.877079	-0.877079	-0.877079	-0.877079
MTF2	0.53094	-0.242019	0.844152	-0.178809	0.848281	-0.190193	-3.23348	-0.408616	-0.930214	0.95438	0.105903	0.286535	0.195865	-0.0814676	0.241198	0.045249	0.466569	0.841517	0.207979	-0.456604	-0.0160806	-0.182322	0.254523	0.629785	-4.49772	0.684907	-4.49772	0.457248	-0.735012	-0.11285	0.726539	0.320362	0.299629	-0.259581	-0.602556	-0.0878581	-0.388551	0.688962	0.379026	0.294363	-0.215637	0.775227	-0.09593	0.311291	-0.691453	-0.320852	-1.51229	0.766176	0.936715
ARRDC1	0.667685	0.0842492	-3.3157	-0.37945	1.18207	-0.594947	-0.338961	-0.0910327	0.249627	0.214812	0.594993	0.960409	-0.631219	0.0322098	0.681148	0.55371	0.311788	0.176573	-0.309968	1.05231	0.479868	-1.32824	-0.095428	1.24689	-0.912839	0.114456	-5.02196	0.643393	-0.180743	-0.630942	0.45619	0.128288	0.358547	0.019686	0.553232	0.52097	1.05298	0.504103	-0.0580444	-1.31265	-2.48372	-0.826135	0.0310947	-3.93643	-0.0572434	-0.0788136	0.792847	0.953725	-0.270738
HAUS4	-2.10656	-0.84936	-0.14893	0.358668	0.136018	-0.0163249	1.16453	0.0143927	-0.455069	-0.0494672	0.149815	-0.239957	0.782021	-0.293096	0.0226823	0.668035	0.675375	0.938818	-0.798383	-0.649364	0.58591	0.383071	0.666851	1.38821	-0.282495	-0.23044	-0.151125	0.424458	-5.17355	-0.723605	-0.510111	-0.670982	-0.592803	-1.0746	-0.42122	0.362584	-0.455118	-2.90152	-0.0724352	0.617552	-0.690505	0.413305	-1.10307	-0.41434	-2.69403	0.958515	-0.527371	1.09653	1.26726
PGBD5	-0.957991	-0.957991	-0.957991	0.744817	0.854052	0.473425	-0.957991	-0.957991	1.31632	-0.957991	-0.957991	1.16393	-0.512118	1.03718	1.8476	-0.243002	-0.957991	0.40586	-0.957991	0.984989	1.24906	-0.957991	-0.374957	0.42756	-0.957991	-0.957991	0.591142	0.440926	0.892426	-0.957991	-0.0331717	0.38478	0.979596	-0.957991	1.03517	0.352269	0.969281	-0.957991	0.561669	-0.957991	-0.957991	-0.957991	-0.957991	-0.957991	-0.957991	-0.957991	-0.957991	-0.957991	1.09134
TRAPPC9	-0.194926	0.135871	-1.07316	1.04541	0.642629	-0.505361	-0.15181	0.452485	0.576775	1.1053	-2.07412	-1.35596	0.490984	0.639871	1.1717	0.853561	-0.698466	-0.103307	0.245939	-1.73448	0.644714	0.320476	0.636758	0.93891	1.16827	-0.348901	-0.245598	0.0173296	-2.63857	-1.16146	-2.10045	0.0899522	0.0867177	0.862604	0.246147	0.312618	-0.0348105	-7.41142	0.0525934	0.112138	-0.0595574	0.978407	-0.740409	0.729991	-0.893594	0.0196314	0.749893	0.815981	0.445177
AIFM1	-0.980338	0.0227646	-0.271901	-0.094256	1.10386	0.0881593	-1.71238	-0.449683	-1.95615	-0.706235	-0.800637	0.483155	-0.234438	0.225945	0.231535	0.257899	0.257014	0.205175	-0.120835	-3.37836	0.496692	-0.0633195	-0.350154	0.742335	-0.944129	0.0862589	-2.11558	-0.220366	-3.68694	-0.196899	-0.346083	0.380422	0.0825319	0.241064	-0.0672106	-0.121659	0.449939	-2.59115	-0.103966	1.02969	-0.288008	0.915127	-1.94747	-0.224877	-3.09194	-0.616378	-1.61032	0.0787381	-0.555634
LINC00668	-0.555087	-0.555087	-0.555087	-0.555087	-0.555087	-0.555087	0.439997	0.749657	0.230555	2.37195	1.79837	1.99549	-0.00458833	-0.555087	2.369	1.65511	0.72051	-0.555087	0.300711	-0.555087	-0.555087	1.90522	-0.555087	-0.555087	-0.555087	-0.555087	2.65367	0.118603	-0.555087	-0.555087	0.87888	-0.555087	0.0943126	-0.555087	-0.555087	-0.555087	1.69817	-0.555087	-0.555087	-0.555087	-0.555087	-0.555087	-0.555087	-0.555087	-0.555087	-0.555087	-0.555087	-0.555087	-0.555087
POLD1	-1.0774	0.848011	0.527398	0.119157	0.503654	0.204742	-0.23178	-0.0747762	0.056251	-0.545612	0.362865	0.473023	1.07745	0.450628	0.917164	0.647625	0.519293	-0.948462	-0.399506	-0.896596	-0.523301	0.0627693	0.759786	0.939503	0.883868	0.488361	0.63062	-0.298043	0.0574999	-0.168849	0.661447	-0.313579	-0.0843334	-0.142866	0.630314	0.333082	0.159818	-4.62384	0.106257	0.473481	-0.452276	-2.79545	-4.62384	-1.34032	-3.27009	-1.42432	-0.67076	0.843555	-0.103721
C10orf71	-0.505285	-0.505285	-0.505285	-0.505285	-0.505285	-0.505285	-0.505285	-0.505285	-0.505285	-0.505285	-0.505285	-0.505285	0.0530319	-0.505285	-0.505285	-0.505285	-0.505285	1.20251	-0.505285	-0.505285	-0.505285	-0.505285	-0.505285	-0.505285	-0.505285	-0.505285	-0.505285	1.53512	1.04265	-0.505285	1.3797	-0.505285	-0.505285	2.6722	1.71028	1.94355	-0.505285	-0.505285	2.11761	2.82149	-0.505285	-0.505285	-0.505285	-0.505285	-0.505285	-0.505285	2.25024	-0.505285	1.08929
EXOSC2	0.412001	0.32433	0.927439	-0.317298	-0.0524793	0.565663	0.780329	-0.035786	0.367384	1.01789	0.837661	0.722798	0.471113	0.17779	0.672071	0.247658	0.590742	0.106388	0.644067	0.966118	0.205671	0.62323	0.226193	0.740216	0.948443	0.704763	-1.34981	0.0371362	-0.543174	0.40168	0.381937	0.519121	0.255207	0.694639	-0.623539	-0.288768	-0.40899	0.514687	-0.522068	0.645057	0.199869	-3.56797	-3.56797	1.11441	0.482207	0.609486	-0.744529	0.25548	0.536693
CES3	-0.672262	-0.672262	-0.672262	-0.672262	-0.672262	1.76504	-0.672262	-0.672262	0.966433	-0.672262	-0.672262	1.59607	-0.672262	1.18081	1.67123	0.36902	-0.0784912	1.9505	1.7458	-0.672262	-0.672262	-0.672262	1.50288	-0.672262	-0.672262	-0.672262	-0.672262	1.09077	-0.672262	-0.672262	0.412474	1.1625	1.84645	1.7199	-0.672262	-0.672262	2.00992	-0.672262	1.02171	-0.672262	-0.672262	-0.672262	-0.672262	-0.672262	-0.672262	-0.672262	-0.672262	-0.672262	1.21287
TK1	-0.164787	0.0143181	0.731066	-0.686203	-0.29465	0.0913071	-2.70778	-3.86759	0.639075	0.802048	1.15934	0.411617	0.594837	0.920954	0.172562	0.501654	0.176318	-0.780485	0.376332	1.3184	-0.365503	0.791353	0.454275	0.425477	0.667664	0.314291	0.17057	0.414649	-0.394384	-0.862623	0.317466	0.0578022	0.252309	0.567872	-0.213849	0.0176469	0.443564	0.406883	-0.393652	0.458647	-1.4059	-0.145256	-3.73037	-2.26467	-0.458595	-0.00602288	0.239186	-0.456374	0.483628
MFSD12	0.381792	0.571409	0.0561557	-0.608976	0.319503	0.192662	0.288734	0.476249	0.16534	0.0868558	0.883339	0.473187	0.416753	0.32677	0.339754	0.39634	-0.258613	-0.407431	0.515949	0.568161	0.787154	0.522666	0.544106	0.503682	0.288809	0.972631	-3.61087	0.588732	-0.157693	0.296807	0.495771	0.245677	0.325013	0.612473	0.656464	0.757822	0.817358	-3.61087	0.729031	-0.358455	-2.76701	-3.61087	-3.61087	-0.108104	-0.5213	-0.217033	0.591724	0.8929	0.105774
DACT3	0.707302	-0.7762	1.95635	2.06677	0.126621	-0.7762	-0.7762	-0.7762	1.59729	-0.7762	-0.7762	0.974829	-0.7762	-0.7762	-0.7762	-0.7762	-0.7762	1.682	-0.7762	0.173923	-0.21386	1.67404	-0.7762	-0.7762	-0.7762	-0.7762	-0.7762	-0.7762	0.475756	1.69125	1.25307	0.643383	0.200677	1.8466	0.623908	-0.0813817	-0.7762	-0.7762	1.29126	1.55013	-0.7762	-0.7762	1.31143	-0.7762	-0.7762	-0.7762	-0.7762	-0.7762	-0.7762
CHRNA10	-0.448762	-0.448762	-0.448762	1.74621	2.85386	-0.448762	-0.448762	-0.448762	-0.448762	-0.448762	-0.448762	-0.448762	-0.448762	-0.448762	-0.448762	-0.448762	-0.448762	-0.448762	-0.448762	-0.448762	-0.448762	-0.448762	-0.448762	-0.448762	-0.448762	-0.448762	-0.448762	-0.448762	2.85306	1.358	-0.448762	1.67435	1.7413	-0.448762	-0.448762	-0.448762	-0.448762	-0.448762	-0.448762	-0.448762	-0.448762	-0.448762	-0.448762	-0.448762	-0.448762	3.14717	0.789069	-0.448762	-0.448762
NKAPL	-0.593834	-0.593834	0.810223	-0.593834	-0.593834	-0.593834	-0.593834	-0.593834	-0.593834	-0.593834	-0.593834	1.06103	-0.593834	-0.593834	0.566298	-0.593834	-0.593834	-0.593834	1.19082	2.03462	0.76362	-0.593834	-0.593834	-0.593834	-0.593834	1.41648	-0.593834	0.505334	2.19957	-0.593834	-0.593834	1.7436	2.25907	-0.593834	1.91506	2.05175	1.16216	-0.593834	0.644794	-0.593834	-0.593834	-0.593834	2.56396	-0.593834	-0.593834	-0.593834	1.02454	-0.593834	1.12885
FANCB	1.22985	1.29092	1.57345	1.84179	-0.916328	-0.916328	-0.916328	-0.916328	1.12998	1.28338	1.02071	1.30169	-0.344338	-0.916328	-0.916328	-0.916328	0.409069	-0.916328	-0.916328	1.2327	-0.204014	-0.124508	1.03429	0.0409464	-0.916328	-0.916328	-0.916328	0.354682	1.38654	-0.253863	0.784453	-0.00315522	1.93716	1.59672	-0.287559	0.340919	1.12996	-0.916328	0.815238	-0.916328	-0.916328	-0.916328	1.33037	-0.916328	-0.916328	-0.916328	-0.916328	-0.916328	0.717296
WFDC13	-1.12269	-0.336632	1.23343	-1.12269	0.604216	-1.12269	1.28159	-1.12269	0.727657	-1.12269	1.89496	0.708611	1.14675	0.919351	0.331359	0.579928	-1.12269	1.12407	0.66764	0.856984	-1.12269	0.301414	0.690165	1.22579	-1.12269	1.51953	-1.12269	1.08882	0.257566	0.915544	0.71776	0.941165	0.316269	-1.12269	0.320926	-1.12269	-1.12269	-1.12269	0.528355	1.09247	-1.12269	-1.12269	-1.12269	-0.171552	-1.12269	-1.12269	-1.12269	-0.545839	-1.12269
NCAPH2	-1.62909	-0.412304	0.173518	0.651555	1.32169	0.425433	0.175062	-0.944183	0.0732971	0.161168	-0.31103	0.654284	0.731914	0.627503	0.819697	0.854941	-0.0727248	0.454312	-0.213028	-0.0588501	0.772943	0.596094	0.39956	-0.139232	0.881834	0.19164	-5.96475	0.16319	-0.735695	-0.625236	0.810387	0.499374	0.271698	0.24973	0.652343	0.150922	0.562033	1.16998	0.827906	0.171713	-0.864852	-0.84865	-5.96475	-0.446503	0.300673	-0.643253	-1.85282	0.45955	0.10087
ADAD1	-0.946381	0.00291002	-1.12532	-0.268023	0.598377	0.700327	0.228602	0.277328	-0.131418	-0.693176	-0.271651	0.313897	-0.0570165	-0.883741	-0.355316	-0.0986979	-1.15344	0.107022	0.139686	-3.41839	0.369993	-0.893215	0.298812	-1.28026	-0.684451	-0.580073	-0.458827	-0.917173	-3.01852	-0.968193	-0.624258	0.331498	0.277549	0.882694	-0.760168	0.345196	-0.215168	-6.04434	-0.278153	0.476332	0.688221	-3.65201	-0.345897	0.966542	-1.35781	0.167154	-0.379257	-0.893956	-0.0509856
VPS33A	-2.07101	-0.296381	-0.0722474	0.367679	0.583799	0.491236	-3.35369	-0.380094	-0.505902	-0.848401	-0.306944	0.215914	-0.0213304	-0.0247516	0.526741	0.543055	0.551715	-0.222911	-0.343753	-1.61542	0.566196	0.289358	0.444017	-0.319393	-0.385764	-0.0310794	0.444707	-0.898779	-1.04259	0.484862	0.447161	0.228928	0.0110888	0.0116113	-0.314439	0.196629	0.250018	-5.68489	0.233908	-1.10007	0.603801	-1.01015	-0.232693	-0.0892125	-0.598767	-0.884904	-0.993306	0.935505	0.291091
LRRC4	-1.04188	-1.04188	0.923971	-1.04188	0.749751	0.513834	-1.04188	1.02566	0.784017	-1.04188	-1.04188	0.649089	-1.04188	-1.04188	-1.04188	-1.04188	-1.04188	1.02848	0.316509	-1.04188	-0.0892961	-0.188488	0.177453	-1.04188	-1.04188	-1.04188	0.537948	1.12653	0.603792	1.01108	0.980626	0.288772	-3.5211e-05	1.62717	1.16078	0.814642	1.19479	-1.04188	0.523468	-1.04188	-1.04188	-1.04188	0.914968	-1.04188	-1.04188	-1.04188	-1.04188	1.42089	1.38081
TLL2	-0.93004	1.75451	-0.93004	-0.93004	-0.93004	-0.93004	-0.93004	-0.93004	0.474634	-0.93004	0.20114	1.0306	-0.93004	-0.93004	1.13907	1.51845	-0.0479696	-0.93004	1.50721	1.23995	-0.93004	1.33603	-0.93004	-0.93004	-0.93004	-0.93004	-0.0165219	0.959424	-0.16328	-0.93004	0.272593	0.115725	1.10176	0.361832	0.962438	0.281289	1.35967	-0.93004	1.28912	-0.93004	-0.93004	-0.93004	-0.93004	-0.93004	1.68905	-0.93004	-0.93004	-0.93004	-0.93004
TRUB2	-3.72111	-0.203945	0.786273	0.540853	-0.0626803	-0.353659	-2.63989	-3.72111	0.369931	0.671884	1.0298	-0.0415164	-0.332752	0.0827241	0.423447	0.0823205	0.512106	0.236019	0.161781	1.03728	0.0553594	-0.219518	0.24614	0.239749	0.883283	0.486994	-1.48856	0.388483	-0.950954	-0.0128597	0.390868	0.168059	0.390326	-0.124184	0.399375	0.267143	0.0132893	0.939615	0.193403	0.0401807	-3.72111	-3.72111	0.00200496	0.379313	0.249444	0.540396	-1.26216	-1.35792	0.138977
LINC01725	-1.18558	-1.18558	-1.18558	0.809447	1.36152	-1.18558	-1.18558	0.242677	0.996057	0.948987	0.671602	-0.45183	1.22471	-1.18558	0.547417	0.746314	-0.551817	1.15489	0.383444	0.322222	-1.18558	0.765195	-1.18558	0.457389	-1.18558	0.732871	0.743292	-0.294642	0.32595	-1.18558	1.13255	1.19015	0.23263	-1.18558	-1.18558	0.0971565	0.992233	-1.18558	1.02139	1.25679	-1.18558	1.81918	-1.18558	-1.18558	-1.18558	-1.18558	-1.18558	1.23142	-1.18558
UBE2D3	-2.67581	0.511568	0.0550352	0.261779	-0.245782	0.464288	-4.18975	1.26051	-0.852992	-2.57041	0.656192	0.165923	-0.74185	0.196633	0.666566	0.0397482	-0.343383	-0.734967	0.21482	-2.72027	0.271383	1.4121	0.411211	0.709529	0.306807	1.08375	0.474296	-2.30512	-3.80651	0.306329	-0.175065	0.666848	-0.14196	-0.847961	-0.211509	-0.202654	-1.03558	-1.6478	-1.00678	-0.443563	-0.141694	0.154527	-2.69822	0.511078	-1.21776	-0.486133	-3.02646	0.338634	-0.599348
ABCB4	0.726931	1.35451	-1.32064	1.27742	0.733954	-1.32064	-1.32064	-1.32064	0.372071	-1.32064	-0.760748	-1.32064	-1.32064	-1.32064	-0.266334	0.451263	0.626129	-1.32064	-0.263428	-0.311101	-1.32064	-1.32064	0.816186	-1.32064	1.17846	-1.32064	-1.32064	1.00911	0.234423	0.178583	0.275884	0.622909	1.01551	-0.821392	-0.140204	-1.32064	-0.00502602	-0.184455	0.207576	-0.453062	-1.32064	-1.32064	-1.32064	1.10914	0.948316	0.829992	0.717465	-1.32064	1.52249
SLCO6A1	-0.446854	-0.446854	-0.446854	-0.446854	0.929245	1.03426	-0.446854	3.42551	-0.446854	-0.446854	2.4395	-0.446854	0.614531	2.28544	-0.446854	2.07116	-0.446854	1.48803	2.31327	-0.446854	1.47625	-0.446854	-0.446854	2.8053	-0.446854	-0.446854	-0.446854	-0.446854	-0.446854	-0.446854	-0.446854	1.62594	-0.446854	-0.446854	1.68722	-0.446854	-0.446854	-0.446854	-0.446854	-0.446854	-0.446854	-0.446854	3.20997	-0.446854	-0.446854	-0.446854	-0.446854	-0.446854	-0.446854
[truncated: 84 more columns]
